# Supplementary material for: Similarities in Gene Expression Profiles during In Vitro Aging of Primary Human Embryonic Lung and Foreskin Fibroblasts
Source: Biomed Res Int. 2015 Aug 3;2015:731938. doi: 10.1155/2015/731938 (PMC4538583; doi:10.1155/2015/731938)
Supplement: Supplementary file 1 — Suppl. Figure 1: (A) Growth curve of MRC-5 and HFF fibroblasts derived from a single vial and maintained in culture as triplicates from an early PD until senescence at late PDs. Data points of all measurements are displayed (not the mean). PDs specified in the plot denoted the time points were the total RNA was collected and subjected to RNA-seq. Black line denotes MRC-5 and green denotes HFF (B) Percentage of SA-β Gal positive cells at different time points of their growth in culture in MRC-5 and HFF fibroblasts. Each curve is measured in triplicate, the mean value is displayed with error bar (± S.E). Red line denotes MRC-5 and black denotes HFF. Suppl. Figure 2: TreeMaps produced using REVIGO () summarizing: (A) 12 GO cellular component (CC) terms found for cluster 3. (B) 21 GO CC terms found for cluster 5. Both clusters contain up-regulated genes but exhibit differences between MRC-5 and HFF. Suppl. Figure 3: TreeMaps produced using REVIGO () summarizing: (A) 59 GO biological processes (BP) terms found for cluster 2. (B) 162 GO BP terms found for cluster 4. Both clusters contain down-regulated genes. Suppl. Figure 4: TreeMaps produced using REVIGO () summarizing 24 GO BP terms found for cluster 1. Suppl. Figure 5: Venn plots showing the number of detected significantly monotonically expression pattern. (A, B): up-/down-regulated in both MRC-5 and HFF. (C) up-regulated in MRC-5 and down-regulated in HFF. (D): vice versa of (C). Suppl. Figure 6: Functional association networks generated using (A) STRING DB and (B) Cognoscente including 23 genes found to be monotonically expressed across the five PD. (A) Only connections between four genes were found using STRING DB. Different line colors represent the types of evidence for the association, explained on the right. (B) Nodes outlined in red are the 23 input genes. There were no interactions found for PCDHB16. 19 intermediates were included by the tool. The edge colors indicate the type of interaction, as explained in [file 731938.f1.zip › mat.731938.v2/SupplTable1_DEG_results_MRC5_HFF.xls]

## Sheet: MRC-5 PD32 to PD42
ensembl_gene_id	external_gene_id	description	gene_biotype	MRC_5_PD32_1	MRC_5_PD32_2	MRC_5_PD32_3	MRC_5_PD42_1	MRC_5_PD42_2	MRC_5_PD42_3	PD32 mean RPKM	PD42 mean RPKM	log2FC	FDR.DESeq	FDR.edgeR
ENSG00000051108	HERPUD1	homocysteine-inducible, endoplasmic reticulum stress-inducible, ubiquitin-like domain member 1 [Source:HGNC Symbol;Acc:13744]	protein_coding	77.2437	73.4218	79.9258	14.8402	13.8512	13.9627	76.8638	14.218	-2.43458	0	0
ENSG00000101255	TRIB3	tribbles homolog 3 (Drosophila) [Source:HGNC Symbol;Acc:16228]	protein_coding	37.5768	35.3132	38.3723	7.40367	7.50208	7.8166	37.0874	7.57412	-2.29178	4.87734e-257	0
ENSG00000044574	HSPA5	heat shock 70kDa protein 5 (glucose-regulated protein, 78kDa) [Source:HGNC Symbol;Acc:5238]	protein_coding	934.873	932.052	991.902	321.054	315.701	335.642	952.943	324.132	-1.55581	2.76443e-194	2.76477e-207
ENSG00000114315	HES1	hairy and enhancer of split 1, (Drosophila) [Source:HGNC Symbol;Acc:5192]	protein_coding	27.6249	24.3264	28.4218	4.54498	4.44983	3.92931	26.791	4.30804	-2.63665	2.10701e-166	3.18517e-250
ENSG00000130766	SESN2	sestrin 2 [Source:HGNC Symbol;Acc:20746]	protein_coding	27.1074	25.6914	26.4316	7.15368	7.43066	7.74722	26.4101	7.44385	-1.82697	9.61656e-161	1.28011e-227
ENSG00000215895	RP11-334L9.1		pseudogene	87.6889	89.0199	96.3093	29.7359	28.7666	30.7514	91.006	29.7513	-1.61301	5.11402e-158	6.45716e-177
ENSG00000128590	DNAJB9	DnaJ (Hsp40) homolog, subfamily B, member 9 [Source:HGNC Symbol;Acc:6968]	protein_coding	24.8542	23.9912	26.6922	6.87661	7.00917	6.59282	25.1792	6.8262	-1.88308	1.13572e-151	1.18915e-196
ENSG00000117318	ID3	inhibitor of DNA binding 3, dominant negative helix-loop-helix protein [Source:HGNC Symbol;Acc:5362]	protein_coding	95.2907	88.3278	100.245	31.8554	30.2793	32.4478	94.6214	31.5275	-1.58556	3.35515e-149	4.65374e-158
ENSG00000250746	RP11-39C10.1		pseudogene	100.594	99.4235	110.839	34.1149	33.3532	36.9719	103.619	34.8133	-1.57358	5.22582e-148	4.1883e-149
ENSG00000149428	HYOU1	hypoxia up-regulated 1 [Source:HGNC Symbol;Acc:16931]	protein_coding	58.2609	60.1487	58.5854	25.3611	23.8808	25.0456	58.9984	24.7625	-1.25252	5.36279e-112	4.29972e-122
ENSG00000144802	NFKBIZ	nuclear factor of kappa light polypeptide gene enhancer in B-cells inhibitor, zeta [Source:HGNC Symbol;Acc:29805]	protein_coding	43.24	39.5769	43.3427	9.52735	8.95933	7.60389	42.0532	8.69686	-2.27365	2.86136e-107	3.7449e-179
ENSG00000142188	TMEM50B	transmembrane protein 50B [Source:HGNC Symbol;Acc:1280]	protein_coding	18.2639	16.8603	19.5388	6.99286	6.69855	6.86781	18.221	6.85308	-1.41078	3.53298e-89	1.54359e-105
ENSG00000153234	NR4A2	nuclear receptor subfamily 4, group A, member 2 [Source:HGNC Symbol;Acc:7981]	protein_coding	31.5403	27.7094	30.0401	5.44974	4.37988	3.10862	29.7632	4.31275	-2.78685	4.22857e-85	3.86425e-79
ENSG00000130513	GDF15	growth differentiation factor 15 [Source:HGNC Symbol;Acc:30142]	protein_coding	110.045	97.8554	107.853	48.4793	45.8778	45.4092	105.251	46.5887	-1.17578	1.51429e-76	5.86022e-81
ENSG00000175197	DDIT3	DNA-damage-inducible transcript 3 [Source:HGNC Symbol;Acc:2726]	protein_coding	37.985	37.1716	42.369	9.60872	10.4419	8.41746	39.1752	9.48937	-2.04556	4.50787e-70	3.3452e-140
ENSG00000018625	ATP1A2	ATPase, Na+/K+ transporting, alpha 2 polypeptide [Source:HGNC Symbol;Acc:800]	protein_coding	2.76883	2.94369	2.78561	0.708347	0.676569	0.805444	2.83271	0.73012	-1.95598	1.67126e-68	1.37063e-105
ENSG00000184164	CRELD2	cysteine-rich with EGF-like domains 2 [Source:HGNC Symbol;Acc:28150]	protein_coding	21.6753	19.6637	22.7726	9.70521	9.07142	9.77369	21.3705	9.51677	-1.16708	1.08209e-66	1.09813e-73
ENSG00000107731	UNC5B	unc-5 homolog B (C. elegans) [Source:HGNC Symbol;Acc:12568]	protein_coding	9.49822	9.43541	9.0964	3.39611	2.95158	3.43265	9.34334	3.26012	-1.51902	3.77596e-65	3.81076e-112
ENSG00000171223	JUNB	jun B proto-oncogene [Source:HGNC Symbol;Acc:6205]	protein_coding	150.158	134.36	142.116	60.3889	53.5504	53.7199	142.211	55.8864	-1.34747	6.84168e-64	7.19356e-90
ENSG00000120738	EGR1	early growth response 1 [Source:HGNC Symbol;Acc:3238]	protein_coding	391.661	369.707	383.204	147.827	122.232	109.756	381.524	126.605	-1.59144	3.50328e-60	5.65859e-64
ENSG00000163660	CCNL1	cyclin L1 [Source:HGNC Symbol;Acc:20569]	protein_coding	28.4929	29.1521	28.7132	14.5094	14.6779	13.6115	28.786	14.2663	-1.01276	6.00416e-59	1.82674e-71
ENSG00000138166	DUSP5	dual specificity phosphatase 5 [Source:HGNC Symbol;Acc:3071]	protein_coding	80.1142	76.2763	86.3274	30.8938	30.3315	26.499	80.906	29.2414	-1.46823	1.06789e-58	8.7743e-93
ENSG00000119138	KLF9	Kruppel-like factor 9 [Source:HGNC Symbol;Acc:1123]	protein_coding	10.2622	9.11591	10.4014	4.32915	4.16859	4.20056	9.92651	4.23277	-1.22968	1.48215e-58	1.51859e-73
ENSG00000073756	PTGS2	prostaglandin-endoperoxide synthase 2 (prostaglandin G/H synthase and cyclooxygenase) [Source:HGNC Symbol;Acc:9605]	protein_coding	3.32596	3.43685	3.1106	0.581106	0.561066	0.432646	3.29114	0.52494	-2.64836	2.93974e-58	1.13201e-134
ENSG00000100219	XBP1	X-box binding protein 1 [Source:HGNC Symbol;Acc:12801]	protein_coding	58.4735	55.9898	64.5379	28.7024	29.6945	28.8349	59.6671	29.0773	-1.03704	4.44638e-58	1.95601e-64
ENSG00000104635	SLC39A14	solute carrier family 39 (zinc transporter), member 14 [Source:HGNC Symbol;Acc:20858]	protein_coding	24.4776	25.2068	25.2862	13.2023	12.6134	12.2437	24.9902	12.6865	-0.978075	1.56343e-57	1.50512e-65
ENSG00000148841	ITPRIP	inositol 1,4,5-trisphosphate receptor interacting protein [Source:HGNC Symbol;Acc:29370]	protein_coding	18.7724	19.5804	17.4667	8.71176	8.32178	8.51853	18.6065	8.51736	-1.12733	4.36128e-56	1.89894e-65
ENSG00000103257	SLC7A5	solute carrier family 7 (amino acid transporter light chain, L system), member 5 [Source:HGNC Symbol;Acc:11063]	protein_coding	31.9121	29.8339	30.2065	13.8473	13.8594	15.472	30.6508	14.3929	-1.09057	2.43703e-54	7.27111e-75
ENSG00000177426	TGIF1	TGFB-induced factor homeobox 1 [Source:HGNC Symbol;Acc:11776]	protein_coding	10.5178	9.95607	10.6812	5.21608	4.97271	4.84032	10.385	5.0097	-1.05171	7.11984e-54	1.20094e-68
ENSG00000168209	DDIT4	DNA-damage-inducible transcript 4 [Source:HGNC Symbol;Acc:24944]	protein_coding	16.9842	17.0386	17.6881	6.79553	7.50759	7.12655	17.237	7.14322	-1.27086	1.4128e-51	4.06592e-84
ENSG00000169429	IL8	interleukin 8 [Source:HGNC Symbol;Acc:6025]	protein_coding	7.80436	6.82021	8.02969	0.818793	0.515104	0.531429	7.55142	0.621775	-3.60228	1.55922e-50	6.52457e-173
ENSG00000136244	IL6	interleukin 6 (interferon, beta 2) [Source:HGNC Symbol;Acc:6018]	protein_coding	9.58487	10.0142	10.033	3.78507	3.69319	3.8194	9.87734	3.76589	-1.39113	3.69291e-50	4.20092e-89
ENSG00000090530	LEPREL1	leprecan-like 1 [Source:HGNC Symbol;Acc:19317]	protein_coding	16.2514	15.4163	15.6162	28.7383	28.8446	27.3378	15.7613	28.3069	0.844767	8.12038e-50	1.21526e-62
ENSG00000153879	CEBPG	CCAAT/enhancer binding protein (C/EBP), gamma [Source:HGNC Symbol;Acc:1837]	protein_coding	13.5224	12.5442	13.931	6.14275	6.1976	6.05191	13.3325	6.13075	-1.12081	1.45747e-48	9.88984e-70
ENSG00000146674	IGFBP3	insulin-like growth factor binding protein 3 [Source:HGNC Symbol;Acc:5472]	protein_coding	17.0137	16.1911	16.678	29.4393	30.4002	30.299	16.6276	30.0461	0.853602	2.04928e-48	2.07913e-73
ENSG00000116584	ARHGEF2	Rho/Rac guanine nucleotide exchange factor (GEF) 2 [Source:HGNC Symbol;Acc:682]	protein_coding	22.1677	21.8382	21.2083	11.4254	11.4706	12.1835	21.738	11.6932	-0.894554	2.10993e-48	2.30438e-60
ENSG00000145050	MANF	mesencephalic astrocyte-derived neurotrophic factor [Source:HGNC Symbol;Acc:15461]	protein_coding	75.045	71.2433	78.5393	32.2524	27.8892	33.2289	74.9425	31.1235	-1.26778	6.24053e-48	4.98327e-75
ENSG00000125968	ID1	inhibitor of DNA binding 1, dominant negative helix-loop-helix protein [Source:HGNC Symbol;Acc:5360]	protein_coding	47.6428	43.3895	49.2133	15.8559	13.7523	17.4637	46.7485	15.6906	-1.57502	8.41738e-48	1.23254e-86
ENSG00000162772	ATF3	activating transcription factor 3 [Source:HGNC Symbol;Acc:785]	protein_coding	31.1772	29.2977	30.5362	11.525	11.1682	8.93323	30.3371	10.5422	-1.52491	9.10955e-47	5.31013e-70
ENSG00000187498	COL4A1	collagen, type IV, alpha 1 [Source:HGNC Symbol;Acc:2202]	protein_coding	61.6103	62.8334	57.7808	120.461	117.537	108.496	60.7415	115.498	0.927116	1.05353e-46	4.53719e-55
ENSG00000107796	ACTA2	actin, alpha 2, smooth muscle, aorta [Source:HGNC Symbol;Acc:130]	protein_coding	37.4997	39.7787	40.6909	78.8296	80.36	70.5821	39.3231	76.5906	0.961789	7.26165e-46	3.0645e-54
ENSG00000128165	ADM2	adrenomedullin 2 [Source:HGNC Symbol;Acc:28898]	protein_coding	3.46611	3.59248	3.77147	1.1902	1.15444	1.16901	3.61002	1.17122	-1.624	1.24256e-43	1.21808e-75
ENSG00000065911	MTHFD2	methylenetetrahydrofolate dehydrogenase (NADP+ dependent) 2, methenyltetrahydrofolate cyclohydrolase [Source:HGNC Symbol;Acc:7434]	protein_coding	30.3877	30.6271	32.9106	13.3262	14.0763	15.6557	31.3085	14.3528	-1.12522	1.53529e-43	3.74803e-68
ENSG00000152049	KCNE4	potassium voltage-gated channel, Isk-related family, member 4 [Source:HGNC Symbol;Acc:6244]	protein_coding	8.23657	7.91539	8.9686	3.75738	3.75328	3.583	8.37352	3.69789	-1.17913	1.53529e-43	2.60633e-62
ENSG00000090520	DNAJB11	DnaJ (Hsp40) homolog, subfamily B, member 11 [Source:HGNC Symbol;Acc:14889]	protein_coding	30.0303	29.1549	31.1162	16.7218	16.0548	17.5205	30.1005	16.7657	-0.844275	1.74881e-43	3.24768e-52
ENSG00000067082	KLF6	Kruppel-like factor 6 [Source:HGNC Symbol;Acc:2235]	protein_coding	66.7597	66.777	65.4214	38.8859	38.9286	36.7038	66.3193	38.1728	-0.796885	3.33745e-43	1.81992e-46
ENSG00000255112	CHMP1B	charged multivesicular body protein 1B [Source:HGNC Symbol;Acc:24287]	protein_coding	37.3205	37.54	39.0475	20.4545	20.6436	20.6856	37.9693	20.5946	-0.882571	1.66712e-42	6.64142e-62
ENSG00000108821	COL1A1	collagen, type I, alpha 1 [Source:HGNC Symbol;Acc:2197]	protein_coding	866.265	822.937	800.201	1352.28	1288.06	1330.42	829.801	1323.59	0.673617	1.93121e-42	1.0292e-42
ENSG00000168003	SLC3A2	solute carrier family 3 (activators of dibasic and neutral amino acid transport), member 2 [Source:HGNC Symbol;Acc:11026]	protein_coding	50.1994	48.4648	52.0231	27.7567	28.5067	30.3958	50.2291	28.8864	-0.798133	5.64093e-42	2.31681e-47
ENSG00000116741	RGS2	regulator of G-protein signaling 2, 24kDa [Source:HGNC Symbol;Acc:9998]	protein_coding	17.4119	17.9853	19.8036	8.08287	8.42292	7.39955	18.4003	7.96844	-1.20736	8.46424e-42	3.49497e-56
ENSG00000115902	SLC1A4	solute carrier family 1 (glutamate/neutral amino acid transporter), member 4 [Source:HGNC Symbol;Acc:10942]	protein_coding	4.61382	4.67465	4.40132	2.03238	1.96898	2.07671	4.56327	2.02602	-1.17142	5.97841e-41	3.00273e-66
ENSG00000139289	PHLDA1	pleckstrin homology-like domain, family A, member 1 [Source:HGNC Symbol;Acc:8933]	protein_coding	66.629	63.3623	66.1063	39.297	38.4933	37.9693	65.3659	38.5865	-0.76044	5.24009e-40	4.92404e-48
ENSG00000160888	IER2	immediate early response 2 [Source:HGNC Symbol;Acc:28871]	protein_coding	89.4862	87.9589	93.0057	46.0221	41.2062	40.3916	90.1503	42.54	-1.08351	1.10299e-39	1.21526e-62
ENSG00000136997	MYC	v-myc myelocytomatosis viral oncogene homolog (avian) [Source:HGNC Symbol;Acc:7553]	protein_coding	37.2526	35.8342	38.1603	18.8438	18.8101	17.0018	37.0823	18.2186	-1.02532	3.3701e-39	7.50421e-61
ENSG00000146278	PNRC1	proline-rich nuclear receptor coactivator 1 [Source:HGNC Symbol;Acc:17278]	protein_coding	24.1156	22.3335	23.8951	11.8731	11.3618	12.2163	23.4481	11.8171	-0.988597	4.4296e-39	3.87667e-57
ENSG00000128342	LIF	leukemia inhibitory factor [Source:HGNC Symbol;Acc:6596]	protein_coding	177.551	167.81	174.636	86.8549	78.7208	71.6767	173.332	79.0841	-1.13208	8.1092e-39	1.33999e-53
ENSG00000179094	PER1	period homolog 1 (Drosophila) [Source:HGNC Symbol;Acc:8845]	protein_coding	8.10712	6.88962	6.84112	2.97607	2.52391	2.78588	7.27929	2.76195	-1.39811	5.57806e-38	8.06341e-57
ENSG00000176907	C8orf4	chromosome 8 open reading frame 4 [Source:HGNC Symbol;Acc:1357]	protein_coding	18.1841	17.2284	18.3133	5.72226	5.69043	4.31532	17.9086	5.24267	-1.77228	4.7297e-37	6.68348e-81
ENSG00000136235	GPNMB	glycoprotein (transmembrane) nmb [Source:HGNC Symbol;Acc:4462]	protein_coding	7.15556	7.40515	7.44606	3.72012	3.76008	3.39857	7.33559	3.62626	-1.01643	2.05734e-36	5.83513e-51
ENSG00000137331	IER3	immediate early response 3 [Source:HGNC Symbol;Acc:5392]	protein_coding	183.887	182.258	193.971	100.923	99.0314	90.1329	186.705	96.6959	-0.949236	2.05484e-35	1.39206e-51
ENSG00000196517	SLC6A9	solute carrier family 6 (neurotransmitter transporter, glycine), member 9 [Source:HGNC Symbol;Acc:11056]	protein_coding	4.78399	4.93595	4.85316	1.71232	1.63259	2.01238	4.8577	1.78576	-1.44373	2.78603e-35	2.0259e-73
ENSG00000162298	SYVN1	synovial apoptosis inhibitor 1, synoviolin [Source:HGNC Symbol;Acc:20738]	protein_coding	15.5494	15.1308	15.3306	8.60878	8.4236	8.51042	15.3369	8.51427	-0.849054	3.6115e-35	1.35321e-52
ENSG00000135069	PSAT1	phosphoserine aminotransferase 1 [Source:HGNC Symbol;Acc:19129]	protein_coding	60.3484	58.1979	62.142	26.5736	28.6231	31.7271	60.2294	28.9746	-1.05568	5.95091e-35	1.14064e-59
ENSG00000090861	AARS	alanyl-tRNA synthetase [Source:HGNC Symbol;Acc:20]	protein_coding	58.7134	62.1077	60.5268	36.3264	35.7798	36.7887	60.4493	36.2983	-0.735823	6.02822e-35	3.07732e-41
ENSG00000128272	ATF4	activating transcription factor 4 (tax-responsive enhancer element B67) [Source:HGNC Symbol;Acc:786]	protein_coding	148.832	147.812	163.245	91.0362	93.2265	93.9933	153.296	92.752	-0.724872	8.55122e-35	1.71384e-37
ENSG00000184205	TSPYL2	TSPY-like 2 [Source:HGNC Symbol;Acc:24358]	protein_coding	16.1531	15.5766	16.3376	8.9016	8.4716	9.26424	16.0225	8.87915	-0.851602	1.02965e-34	9.6012e-48
ENSG00000101333	PLCB4	phospholipase C, beta 4 [Source:HGNC Symbol;Acc:9059]	protein_coding	9.38474	10.0312	9.52247	16.9163	16.3859	15.5238	9.64613	16.2754	0.754667	1.40439e-34	2.83292e-40
ENSG00000153714	LURAP1L	leucine rich adaptor protein 1-like [Source:HGNC Symbol;Acc:31452]	protein_coding	13.2918	14.7845	15.6354	5.97744	6.37057	5.46213	14.5706	5.93671	-1.29532	3.88272e-34	6.07674e-52
ENSG00000120129	DUSP1	dual specificity phosphatase 1 [Source:HGNC Symbol;Acc:3064]	protein_coding	350.279	336.908	362.593	193.417	190.155	171.824	349.927	185.132	-0.918496	1.94079e-33	2.54185e-47
ENSG00000179388	EGR3	early growth response 3 [Source:HGNC Symbol;Acc:3240]	protein_coding	2.18147	1.95319	2.0219	0.200277	0.201055	0.101828	2.05219	0.16772	-3.61304	8.2141e-33	2.18144e-140
ENSG00000155090	KLF10	Kruppel-like factor 10 [Source:HGNC Symbol;Acc:11810]	protein_coding	36.8024	35.1868	36.7179	18.1299	15.5505	14.4016	36.2357	16.0273	-1.17688	1.54464e-32	5.14961e-48
ENSG00000223609	HBD	hemoglobin, delta [Source:HGNC Symbol;Acc:4829]	protein_coding	12.3386	12.9347	14.4701	30.5647	33.0626	27.3618	13.2478	30.3297	1.19498	4.36053e-32	4.99778e-46
ENSG00000143384	MCL1	myeloid cell leukemia sequence 1 (BCL2-related) [Source:HGNC Symbol;Acc:6943]	protein_coding	166.898	159.656	168.951	91.7037	87.6084	79.6589	165.168	86.3237	-0.936108	6.0318e-32	2.42755e-46
ENSG00000164211	STARD4	StAR-related lipid transfer (START) domain containing 4 [Source:HGNC Symbol;Acc:18058]	protein_coding	19.5115	18.1021	19.4854	10.9628	11.6385	10.7996	19.033	11.1336	-0.773578	6.39477e-32	1.11494e-38
ENSG00000128228	SDF2L1	stromal cell-derived factor 2-like 1 [Source:HGNC Symbol;Acc:10676]	protein_coding	56.8089	50.0777	55.5595	19.2199	17.0025	24.0914	54.1487	20.1046	-1.4294	6.88089e-32	5.27562e-46
ENSG00000133639	BTG1	B-cell translocation gene 1, anti-proliferative [Source:HGNC Symbol;Acc:1130]	protein_coding	19.2988	18.7703	21.7276	10.0521	10.9238	10.4749	19.9322	10.4836	-0.926966	1.22866e-31	9.14163e-39
ENSG00000141682	PMAIP1	phorbol-12-myristate-13-acetate-induced protein 1 [Source:HGNC Symbol;Acc:9108]	protein_coding	58.7307	56.2396	60.4069	34.1912	34.9313	34.7143	58.4591	34.6122	-0.756144	1.35056e-31	3.35612e-44
ENSG00000070669	ASNS	asparagine synthetase (glutamine-hydrolyzing) [Source:HGNC Symbol;Acc:753]	protein_coding	22.781	23.1821	25.0248	10.4718	10.6799	12.5705	23.6626	11.2407	-1.07387	2.46879e-31	2.18708e-50
ENSG00000170345	FOS	FBJ murine osteosarcoma viral oncogene homolog [Source:HGNC Symbol;Acc:3796]	protein_coding	189.935	181.674	196.889	83.0339	79.4718	56.7123	189.499	73.0726	-1.37479	1.19854e-43	3.27008e-31
ENSG00000142178	SIK1	salt-inducible kinase 1 [Source:HGNC Symbol;Acc:11142]	protein_coding	10.4801	9.03288	10.3084	3.90391	3.47616	2.8106	9.94048	3.39689	-1.5491	3.17484e-30	1.14952e-48
ENSG00000154188	ANGPT1	angiopoietin 1 [Source:HGNC Symbol;Acc:484]	protein_coding	6.53678	6.63103	6.25045	10.5182	10.8693	10.7002	6.47275	10.6959	0.724606	3.5586e-30	4.16852e-43
ENSG00000134871	COL4A2	collagen, type IV, alpha 2 [Source:HGNC Symbol;Acc:2203]	protein_coding	116.665	115.161	106.121	179.166	173.081	168.224	112.649	173.49	0.623021	5.90422e-31	6.52551e-30
ENSG00000168575	SLC20A2	solute carrier family 20 (phosphate transporter), member 2 [Source:HGNC Symbol;Acc:10947]	protein_coding	23.3568	23.5049	23.1267	37.3515	36.0699	34.6076	23.3295	36.0097	0.626231	7.68139e-30	5.93688e-35
ENSG00000059728	MXD1	MAX dimerization protein 1 [Source:HGNC Symbol;Acc:6761]	protein_coding	3.29571	3.32754	3.34166	1.56119	1.46483	1.46864	3.32164	1.49822	-1.14865	1.36989e-29	3.29837e-54
ENSG00000111912	NCOA7	nuclear receptor coactivator 7 [Source:HGNC Symbol;Acc:21081]	protein_coding	3.84283	3.86751	3.72508	1.90698	1.79249	1.76524	3.81181	1.82157	-1.06529	1.8704e-29	6.30267e-49
ENSG00000113369	ARRDC3	arrestin domain containing 3 [Source:HGNC Symbol;Acc:29263]	protein_coding	20.6532	20.8118	21.1565	10.9898	11.4349	9.98634	20.8738	10.8037	-0.950171	8.18998e-29	8.86021e-49
ENSG00000113140	SPARC	secreted protein, acidic, cysteine-rich (osteonectin) [Source:HGNC Symbol;Acc:11219]	protein_coding	486.474	502.36	505.313	733.721	735.707	718.832	498.049	729.42	0.550462	1.2776e-28	1.8873e-34
ENSG00000136826	KLF4	Kruppel-like factor 4 (gut) [Source:HGNC Symbol;Acc:6348]	protein_coding	8.51141	7.57489	7.77052	2.70607	2.62747	1.73251	7.95227	2.35535	-1.75543	3.10056e-28	6.42969e-40
ENSG00000176046	NUPR1	nuclear protein, transcriptional regulator, 1 [Source:HGNC Symbol;Acc:29990]	protein_coding	71.7567	69.8542	73.1579	41.6215	41.3126	43.3635	71.5896	42.0992	-0.765956	4.97522e-28	9.12994e-42
ENSG00000173334	TRIB1	tribbles homolog 1 (Drosophila) [Source:HGNC Symbol;Acc:16891]	protein_coding	24.0035	23.4517	24.5978	11.9839	12.691	10.6396	24.0177	11.7715	-1.0288	8.28515e-28	2.05813e-48
ENSG00000187479	C11orf96	chromosome 11 open reading frame 96 [Source:HGNC Symbol;Acc:38675]	protein_coding	2.02382	2.14121	2.08065	0.409753	0.481862	0.393518	2.08189	0.428377	-2.28094	1.89071e-27	4.16717e-52
ENSG00000124216	SNAI1	snail homolog 1 (Drosophila) [Source:HGNC Symbol;Acc:11128]	protein_coding	10.9978	9.25135	10.5528	4.56465	4.10233	4.83818	10.2673	4.50172	-1.18951	2.18604e-27	5.8082e-36
ENSG00000103175	WFDC1	WAP four-disulfide core domain 1 [Source:HGNC Symbol;Acc:15466]	protein_coding	6.18228	6.06227	6.05101	9.82571	9.5642	9.66726	6.09852	9.68572	0.667401	4.95598e-27	8.95108e-41
ENSG00000130066	SAT1	spermidine/spermine N1-acetyltransferase 1 [Source:HGNC Symbol;Acc:10540]	protein_coding	37.2924	37.2991	41.1095	18.3113	19.8619	15.6237	38.567	17.9323	-1.10481	6.21141e-27	1.88797e-38
ENSG00000138061	CYP1B1	cytochrome P450, family 1, subfamily B, polypeptide 1 [Source:HGNC Symbol;Acc:2597]	protein_coding	9.62453	9.12629	9.31719	5.35531	5.08975	5.72059	9.356	5.38855	-0.795995	3.19637e-26	1.10161e-35
ENSG00000135074	ADAM19	ADAM metallopeptidase domain 19 [Source:HGNC Symbol;Acc:197]	protein_coding	8.26267	8.52137	7.8362	12.8476	12.8703	12.3718	8.20674	12.6966	0.629556	7.89931e-26	6.7507e-31
ENSG00000261490	RP11-448G15.3		sense_overlapping	4.18628	3.29919	3.93698	1.43226	1.16006	1.43977	3.80749	1.34403	-1.50227	9.71313e-26	3.29872e-37
ENSG00000086619	ERO1LB	ERO1-like beta (S. cerevisiae) [Source:HGNC Symbol;Acc:14355]	protein_coding	2.28695	2.09302	2.13156	0.912927	0.843345	0.816038	2.17051	0.857437	-1.33993	9.96072e-26	2.35142e-44
ENSG00000144655	CSRNP1	cysteine-serine-rich nuclear protein 1 [Source:HGNC Symbol;Acc:14300]	protein_coding	16.4505	14.7524	16.1088	8.45987	7.14822	7.95224	15.7706	7.85344	-1.00584	1.82282e-25	1.62629e-40
ENSG00000071537	SEL1L	sel-1 suppressor of lin-12-like (C. elegans) [Source:HGNC Symbol;Acc:10717]	protein_coding	32.3805	33.5093	31.9781	20.4306	20.7178	19.0926	32.6227	20.0803	-0.70009	2.31717e-25	2.06984e-30
ENSG00000169851	PCDH7	protocadherin 7 [Source:HGNC Symbol;Acc:8659]	protein_coding	2.66532	2.8755	2.56383	4.57185	4.85675	5.07532	2.70155	4.83464	0.839621	2.59052e-25	1.09508e-35
ENSG00000104368	PLAT	plasminogen activator, tissue [Source:HGNC Symbol;Acc:9051]	protein_coding	174.051	176.655	173.968	116.719	114.262	116.353	174.891	115.778	-0.595099	7.57018e-25	1.34612e-30
ENSG00000165997	ARL5B	ADP-ribosylation factor-like 5B [Source:HGNC Symbol;Acc:23052]	protein_coding	9.73682	9.1834	9.43527	4.99379	5.39879	4.70985	9.45183	5.03414	-0.908847	8.62681e-25	6.95e-42
ENSG00000087074	PPP1R15A	protein phosphatase 1, regulatory subunit 15A [Source:HGNC Symbol;Acc:14375]	protein_coding	119.489	123.423	126.624	82.8656	78.1998	77.9911	123.179	79.6855	-0.628363	8.59398e-25	1.76257e-26
ENSG00000172432	GTPBP2	GTP binding protein 2 [Source:HGNC Symbol;Acc:4670]	protein_coding	24.3603	23.9322	25.2413	15.3397	14.8152	15.8097	24.5113	15.3215	-0.677882	1.75226e-24	7.94648e-34
ENSG00000125740	FOSB	FBJ murine osteosarcoma viral oncogene homolog B [Source:HGNC Symbol;Acc:3797]	protein_coding	73.33	62.3963	70.8312	20.611	17.7531	9.61612	68.8525	15.9934	-2.10603	1.3903e-35	2.20406e-24
ENSG00000132386	SERPINF1	serpin peptidase inhibitor, clade F (alpha-2 antiplasmin, pigment epithelium derived factor), member 1 [Source:HGNC Symbol;Acc:8824]	protein_coding	63.0518	58.6602	65.796	39.3868	38.6535	37.6375	62.5027	38.5593	-0.696839	2.22869e-24	3.47884e-29
ENSG00000165030	NFIL3	nuclear factor, interleukin 3 regulated [Source:HGNC Symbol;Acc:7787]	protein_coding	30.3458	29.5803	31.522	18.4523	17.8998	18.5969	30.4827	18.3163	-0.734861	2.55977e-24	9.96248e-36
ENSG00000163430	FSTL1	follistatin-like 1 [Source:HGNC Symbol;Acc:3972]	protein_coding	129.064	129.522	130.553	180.585	190.632	183.508	129.713	184.908	0.511488	2.55977e-24	9.19318e-31
ENSG00000140044	JDP2	Jun dimerization protein 2 [Source:HGNC Symbol;Acc:17546]	protein_coding	8.16674	7.6613	7.56738	4.41635	4.34329	4.76181	7.79847	4.50715	-0.790975	2.92913e-24	6.3754e-33
ENSG00000127528	KLF2	Kruppel-like factor 2 (lung) [Source:HGNC Symbol;Acc:6347]	protein_coding	13.9424	11.8739	13.0555	6.0419	6.26534	6.9205	12.9573	6.40925	-1.01553	2.92913e-24	9.28766e-33
ENSG00000166886	NAB2	NGFI-A binding protein 2 (EGR1 binding protein 2) [Source:HGNC Symbol;Acc:7627]	protein_coding	14.2963	14.8982	15.2676	24.5234	22.1168	24.6548	14.8207	23.765	0.681222	5.95334e-24	7.47203e-31
ENSG00000184575	XPOT	exportin, tRNA (nuclear export receptor for tRNAs) [Source:HGNC Symbol;Acc:12826]	protein_coding	32.8544	32.8227	33.2857	21.1292	22.0569	21.5313	32.9876	21.5725	-0.612732	1.52935e-23	4.18031e-31
ENSG00000261270	RP11-325K4.3		sense_intronic	5.29199	5.11196	5.15277	0.722881	0.556856	0.913984	5.18558	0.731241	-2.82609	1.65421e-23	5.82449e-45
ENSG00000159388	BTG2	BTG family, member 2 [Source:HGNC Symbol;Acc:1131]	protein_coding	14.7661	14.5724	15.005	7.74399	7.54637	6.63469	14.7812	7.30835	-1.01614	1.67631e-23	2.35732e-43
ENSG00000158615	PPP1R15B	protein phosphatase 1, regulatory subunit 15B [Source:HGNC Symbol;Acc:14951]	protein_coding	13.9256	13.1032	12.8585	8.41626	7.69834	7.97344	13.2958	8.02934	-0.727613	2.31434e-23	6.88147e-28
ENSG00000236333	TRHDE-AS1	TRHDE antisense RNA 1 [Source:HGNC Symbol;Acc:27471]	lincRNA	3.00627	3.04799	2.89457	4.85339	5.27865	4.80118	2.98294	4.97774	0.738755	2.35461e-23	9.92607e-33
ENSG00000144810	COL8A1	collagen, type VIII, alpha 1 [Source:HGNC Symbol;Acc:2215]	protein_coding	13.5191	13.4895	13.3468	19.6986	20.573	19.0487	13.4518	19.7735	0.555765	9.84264e-23	8.09113e-29
ENSG00000109861	CTSC	cathepsin C [Source:HGNC Symbol;Acc:2528]	protein_coding	40.0739	40.1143	42.5757	56.0039	59.9344	58.2673	40.9213	58.0685	0.504905	1.06217e-22	5.57169e-27
ENSG00000115738	ID2	inhibitor of DNA binding 2, dominant negative helix-loop-helix protein [Source:HGNC Symbol;Acc:5361]	protein_coding	19.2993	18.0597	20.2188	11.2307	10.4221	11.5092	19.1926	11.054	-0.795979	1.14812e-22	2.94641e-30
ENSG00000123358	NR4A1	nuclear receptor subfamily 4, group A, member 1 [Source:HGNC Symbol;Acc:7980]	protein_coding	68.4479	57.977	62.4445	27.8572	23.4884	18.9273	62.9565	23.4243	-1.42635	6.40997e-22	2.1943e-33
ENSG00000049540	ELN	elastin [Source:HGNC Symbol;Acc:3327]	protein_coding	0.364623	0.424469	0.330469	1.32819	1.10841	1.02438	0.373187	1.15366	1.62825	7.30905e-22	2.0687e-30
ENSG00000261114	RP11-325K4.2		sense_intronic	5.18706	3.84586	5.39165	0.828711	0.758076	0.90372	4.80819	0.830169	-2.53402	8.05115e-22	4.61245e-35
ENSG00000213949	ITGA1	integrin, alpha 1 [Source:HGNC Symbol;Acc:6134]	protein_coding	11.0122	11.7733	10.7993	17.6658	17.8387	16.3859	11.1949	17.2968	0.627659	8.99675e-22	2.46079e-27
ENSG00000163703	CRELD1	cysteine-rich with EGF-like domains 1 [Source:HGNC Symbol;Acc:14630]	protein_coding	13.6021	13.083	13.7119	8.25141	7.94433	7.90993	13.4656	8.03522	-0.744874	9.77001e-22	1.03721e-33
ENSG00000173114	LRRN3	leucine rich repeat neuronal 3 [Source:HGNC Symbol;Acc:17200]	protein_coding	3.53205	3.76132	3.9009	6.36888	6.93629	6.5613	3.73142	6.62215	0.827575	1.2363e-21	4.61245e-35
ENSG00000106484	MEST	mesoderm specific transcript homolog (mouse) [Source:HGNC Symbol;Acc:7028]	protein_coding	62.9861	62.2104	65.3046	86.4892	89.5371	93.5613	63.5004	89.8625	0.500954	1.2363e-21	1.00809e-27
ENSG00000228218	ATF4P3	activating transcription factor 4 pseudogene 3 [Source:HGNC Symbol;Acc:788]	pseudogene	36.3226	34.9404	38.096	20.649	22.1846	20.3909	36.453	21.0748	-0.790517	1.35156e-21	9.84893e-31
ENSG00000116285	ERRFI1	ERBB receptor feedback inhibitor 1 [Source:HGNC Symbol;Acc:18185]	protein_coding	27.0714	25.7798	27.0866	17.7723	16.6762	16.3965	26.6459	16.9483	-0.652772	1.668e-21	8.78864e-27
ENSG00000198855	FICD	FIC domain containing [Source:HGNC Symbol;Acc:18416]	protein_coding	5.09087	5.31009	5.24464	2.79268	2.61441	2.74845	5.2152	2.71852	-0.939903	3.50302e-21	3.2575e-37
ENSG00000100889	PCK2	phosphoenolpyruvate carboxykinase 2 (mitochondrial) [Source:HGNC Symbol;Acc:8725]	protein_coding	12.4213	11.9815	11.6819	5.31403	5.3861	6.66142	12.0282	5.78718	-1.05549	4.31644e-21	7.00375e-38
ENSG00000081041	CXCL2	chemokine (C-X-C motif) ligand 2 [Source:HGNC Symbol;Acc:4603]	protein_coding	4.49061	4.39373	5.3064	0.269414	0.496998	0.169422	4.73025	0.311945	-3.92255	4.88872e-21	1.334e-103
ENSG00000152952	PLOD2	procollagen-lysine, 2-oxoglutarate 5-dioxygenase 2 [Source:HGNC Symbol;Acc:9082]	protein_coding	19.1303	18.4642	19.0438	27.0981	27.291	26.0715	18.8795	26.8202	0.506503	8.63684e-21	4.90295e-27
ENSG00000157734	SNX22	sorting nexin 22 [Source:HGNC Symbol;Acc:16315]	protein_coding	1.09748	0.870819	1.08411	0.315686	0.304668	0.300036	1.01747	0.306797	-1.72963	8.63967e-21	3.58169e-34
ENSG00000128510	CPA4	carboxypeptidase A4 [Source:HGNC Symbol;Acc:15740]	protein_coding	19.1488	19.6146	19.1028	28.2097	28.2345	27.9371	19.2887	28.1271	0.544202	1.48723e-20	5.99937e-30
ENSG00000184557	SOCS3	suppressor of cytokine signaling 3 [Source:HGNC Symbol;Acc:19391]	protein_coding	43.9721	41.2971	44.1387	28.3221	26.714	25.7744	43.136	26.9368	-0.679311	1.66354e-20	2.85887e-27
ENSG00000170498	KISS1	KiSS-1 metastasis-suppressor [Source:HGNC Symbol;Acc:6341]	protein_coding	14.0408	14.4581	15.2875	27.4578	25.9617	27.4265	14.5955	26.9487	0.884692	2.65752e-20	1.52304e-36
ENSG00000113811	RP11-884K10.5	selenoprotein K [Source:RefSeq peptide;Acc:NP_067060]	protein_coding	18.128	18.6799	19.5803	11.2567	11.4648	10.6182	18.7961	11.1132	-0.758153	2.9344e-20	2.51433e-28
ENSG00000167244	IGF2	insulin-like growth factor 2 (somatomedin A) [Source:HGNC Symbol;Acc:5466]	protein_coding	10.7187	12.2273	9.66672	17.9495	17.1023	18.591	10.8709	17.8809	0.71795	2.5204e-20	8.15972e-21
ENSG00000134107	BHLHE40	basic helix-loop-helix family, member e40 [Source:HGNC Symbol;Acc:1046]	protein_coding	37.3834	36.0162	38.2988	21.9552	20.25	17.4011	37.2328	19.8688	-0.90607	3.50707e-20	9.92857e-28
ENSG00000134333	LDHA	lactate dehydrogenase A [Source:HGNC Symbol;Acc:6535]	protein_coding	67.4919	68.1732	74.6	96.4182	104.398	106.632	70.0884	102.483	0.548136	4.00046e-20	6.66155e-25
ENSG00000112715	VEGFA	vascular endothelial growth factor A [Source:HGNC Symbol;Acc:12680]	protein_coding	9.01847	8.30496	8.57569	5.81465	5.67795	5.39941	8.63304	5.63067	-0.616562	4.41416e-20	6.98537e-23
ENSG00000100906	NFKBIA	nuclear factor of kappa light polypeptide gene enhancer in B-cells inhibitor, alpha [Source:HGNC Symbol;Acc:7797]	protein_coding	21.0156	20.7648	22.6532	12.8157	13.833	12.5463	21.4779	13.065	-0.717147	8.35013e-20	1.13067e-25
ENSG00000102580	DNAJC3	DnaJ (Hsp40) homolog, subfamily C, member 3 [Source:HGNC Symbol;Acc:9439]	protein_coding	29.7183	30.5918	25.4357	15.9062	14.8423	14.061	28.5819	14.9365	-0.936262	1.1443e-19	1.33949e-25
ENSG00000149798	CDC42EP2	CDC42 effector protein (Rho GTPase binding) 2 [Source:HGNC Symbol;Acc:16263]	protein_coding	29.5739	26.7341	28.6552	17.2036	16.572	18.7619	28.3211	17.5125	-0.69349	1.40994e-19	1.08254e-24
ENSG00000108691	CCL2	chemokine (C-C motif) ligand 2 [Source:HGNC Symbol;Acc:10618]	protein_coding	54.8764	55.5311	59.987	93.8598	94.869	84.3468	56.7982	91.0252	0.680421	1.7078e-19	8.51915e-27
ENSG00000127951	FGL2	fibrinogen-like 2 [Source:HGNC Symbol;Acc:3696]	protein_coding	5.68024	5.53942	5.6497	3.16561	3.18753	2.8619	5.62312	3.07168	-0.872342	3.221e-19	3.43402e-31
ENSG00000174437	ATP2A2	ATPase, Ca++ transporting, cardiac muscle, slow twitch 2 [Source:HGNC Symbol;Acc:812]	protein_coding	51.283	52.1651	49.46	35.5357	34.7342	35.2591	50.9693	35.1763	-0.535025	4.16775e-19	2.87638e-21
ENSG00000164741	DLC1	deleted in liver cancer 1 [Source:HGNC Symbol;Acc:2897]	protein_coding	33.7665	32.7531	31.0632	22.3895	21.9487	22.3196	32.5276	22.2193	-0.549851	4.15876e-19	2.0562e-20
ENSG00000128016	ZFP36	zinc finger protein 36, C3H type, homolog (mouse) [Source:HGNC Symbol;Acc:12862]	protein_coding	152.682	133.063	148.353	79.7176	79.0967	65.7434	144.699	74.8526	-0.950932	6.62063e-19	1.56981e-29
ENSG00000172201	ID4	inhibitor of DNA binding 4, dominant negative helix-loop-helix protein [Source:HGNC Symbol;Acc:5363]	protein_coding	5.15608	4.80171	4.93568	1.58868	1.53486	1.03112	4.96449	1.38489	-1.84188	7.11051e-19	5.50043e-48
ENSG00000251022	THAP9-AS1	THAP9 antisense RNA 1 [Source:HGNC Symbol;Acc:44172]	processed_transcript	11.1966	10.2113	11.2836	6.60755	6.78021	6.50898	10.8972	6.63224	-0.716387	1.59886e-18	1.79559e-26
ENSG00000165195	PIGA	phosphatidylinositol glycan anchor biosynthesis, class A [Source:HGNC Symbol;Acc:8957]	protein_coding	2.71691	2.56298	2.39431	1.15977	1.10187	0.945813	2.55807	1.06915	-1.25859	1.64323e-18	7.57338e-29
ENSG00000137825	ITPKA	inositol-trisphosphate 3-kinase A [Source:HGNC Symbol;Acc:6178]	protein_coding	3.43919	2.98239	2.8097	1.14824	0.987465	1.03816	3.07709	1.05796	-1.54029	1.98185e-18	5.02363e-30
ENSG00000164683	HEY1	hairy/enhancer-of-split related with YRPW motif 1 [Source:HGNC Symbol;Acc:4880]	protein_coding	0.974221	0.831762	0.894897	0.179229	0.138065	0.16146	0.900293	0.159585	-2.49607	2.30431e-18	2.2706e-35
ENSG00000155660	PDIA4	protein disulfide isomerase family A, member 4 [Source:HGNC Symbol;Acc:30167]	protein_coding	200.719	198.576	204.471	140.947	134.408	144.056	201.255	139.804	-0.525625	2.3838e-18	7.42115e-22
ENSG00000196616	ADH1B	alcohol dehydrogenase 1B (class I), beta polypeptide [Source:HGNC Symbol;Acc:250]	protein_coding	1.13817	1.15741	1.22575	0.462715	0.473209	0.419414	1.17378	0.451779	-1.37747	4.38002e-18	3.13237e-33
ENSG00000122877	EGR2	early growth response 2 [Source:HGNC Symbol;Acc:3239]	protein_coding	0.868187	0.878253	0.915937	0.162151	0.0979891	0.0964995	0.887459	0.11888	-2.90018	5.73133e-18	2.91122e-47
ENSG00000119508	NR4A3	nuclear receptor subfamily 4, group A, member 3 [Source:HGNC Symbol;Acc:7982]	protein_coding	0.715282	0.584836	0.55062	0.140892	0.154597	0.169646	0.616913	0.155045	-1.99238	7.51826e-18	6.50714e-30
ENSG00000076706	MCAM	melanoma cell adhesion molecule [Source:HGNC Symbol;Acc:6934]	protein_coding	32.8835	33.0627	33.3166	45.6898	44.3043	45.4465	33.0876	45.1469	0.448335	9.46968e-18	6.15192e-24
ENSG00000183287	CCBE1	collagen and calcium binding EGF domains 1 [Source:HGNC Symbol;Acc:29426]	protein_coding	38.6427	41.2132	37.6407	56.2059	57.1141	55.4309	39.1655	56.2503	0.522277	1.39865e-17	3.7421e-22
ENSG00000185022	MAFF	v-maf musculoaponeurotic fibrosarcoma oncogene homolog F (avian) [Source:HGNC Symbol;Acc:6780]	protein_coding	26.9011	25.056	28.2829	17.005	14.6987	16.0806	26.7467	15.9281	-0.747784	1.64721e-17	1.25864e-24
ENSG00000150687	PRSS23	protease, serine, 23 [Source:HGNC Symbol;Acc:14370]	protein_coding	18.458	18.6702	19.4818	25.2128	26.1998	26.0442	18.87	25.8189	0.452335	1.77909e-17	1.53752e-23
ENSG00000120053	GOT1	glutamic-oxaloacetic transaminase 1, soluble (aspartate aminotransferase 1) [Source:HGNC Symbol;Acc:4432]	protein_coding	21.4743	21.6007	22.197	13.6729	14.1962	13.8875	21.7573	13.9189	-0.644458	1.9875e-17	1.38491e-26
ENSG00000204954	C12orf73	chromosome 12 open reading frame 73 [Source:HGNC Symbol;Acc:34450]	protein_coding	4.53035	3.65449	4.06711	2.02471	1.85568	1.91618	4.08398	1.93219	-1.07974	2.69814e-17	1.51749e-24
ENSG00000146733	PSPH	phosphoserine phosphatase [Source:HGNC Symbol;Acc:9577]	protein_coding	10.3636	10.1501	11.1064	5.84991	5.32137	6.33431	10.5401	5.83519	-0.853032	3.97357e-17	5.5175e-28
ENSG00000142871	CYR61	cysteine-rich, angiogenic inducer, 61 [Source:HGNC Symbol;Acc:2654]	protein_coding	611.651	606.661	642.735	432.067	448.897	438.403	620.349	439.789	-0.496269	4.26624e-17	5.96119e-20
ENSG00000167797	CDK2AP2	cyclin-dependent kinase 2 associated protein 2 [Source:HGNC Symbol;Acc:30833]	protein_coding	17.2966	16.9288	18.0009	9.38601	8.10845	10.0121	17.4087	9.16885	-0.924999	7.48362e-17	1.51294e-31
ENSG00000100234	TIMP3	TIMP metallopeptidase inhibitor 3 [Source:HGNC Symbol;Acc:11822]	protein_coding	111.417	112.269	111.365	81.061	76.2365	77.5841	111.684	78.2939	-0.512445	9.55944e-17	4.4128e-19
ENSG00000223547	ZNF844	zinc finger protein 844 [Source:HGNC Symbol;Acc:25932]	protein_coding	2.49346	2.49896	2.63467	1.36879	1.33548	1.33177	2.54236	1.34535	-0.918189	1.32546e-16	5.5686e-31
ENSG00000204262	COL5A2	collagen, type V, alpha 2 [Source:HGNC Symbol;Acc:2210]	protein_coding	114.834	121.559	114.603	157.109	159.908	152.004	116.999	156.34	0.418197	5.80142e-17	7.82915e-17
ENSG00000256167	ATF4P4	activating transcription factor 4 pseudogene 4 [Source:HGNC Symbol;Acc:787]	pseudogene	16.3194	15.1579	17.7261	9.5305	10.1581	10.2866	16.4011	9.99175	-0.714984	1.76111e-16	3.41687e-21
ENSG00000168685	IL7R	interleukin 7 receptor [Source:HGNC Symbol;Acc:6024]	protein_coding	22.8775	22.9408	23.7434	31.6604	32.6617	30.7239	23.1872	31.682	0.450333	1.81246e-16	7.24066e-21
ENSG00000135269	TES	testis derived transcript (3 LIM domains) [Source:HGNC Symbol;Acc:14620]	protein_coding	10.7001	10.6176	10.7378	6.55662	6.62425	7.14848	10.6852	6.77645	-0.657005	2.37803e-16	5.88483e-25
ENSG00000019549	SNAI2	snail homolog 2 (Drosophila) [Source:HGNC Symbol;Acc:11094]	protein_coding	49.0453	48.2214	50.9538	33.3803	33.9999	33.134	49.4068	33.5047	-0.560346	2.42681e-16	4.06024e-23
ENSG00000136010	ALDH1L2	aldehyde dehydrogenase 1 family, member L2 [Source:HGNC Symbol;Acc:26777]	protein_coding	15.9754	17.1701	14.8155	9.79774	10.7705	10.2869	15.987	10.2851	-0.63635	2.29129e-16	1.36079e-17
ENSG00000074935	TUBE1	tubulin, epsilon 1 [Source:HGNC Symbol;Acc:20775]	protein_coding	6.58554	5.48406	5.73643	2.83939	3.35202	3.07227	5.93534	3.08789	-0.942709	4.05511e-16	3.85677e-20
ENSG00000002745	WNT16	wingless-type MMTV integration site family, member 16 [Source:HGNC Symbol;Acc:16267]	protein_coding	2.38951	2.71769	2.65186	4.63755	4.83208	4.55648	2.58635	4.67537	0.854162	5.48437e-16	1.57402e-27
ENSG00000105835	NAMPT	nicotinamide phosphoribosyltransferase [Source:HGNC Symbol;Acc:30092]	protein_coding	8.93095	8.2137	8.91082	5.85963	5.93905	5.55436	8.68516	5.78435	-0.586398	8.19937e-16	1.8945e-19
ENSG00000130176	CNN1	calponin 1, basic, smooth muscle [Source:HGNC Symbol;Acc:2155]	protein_coding	33.8997	33.6644	33.8579	49.033	49.6408	45.6701	33.8073	48.1146	0.509139	8.82526e-16	1.19621e-21
ENSG00000107317	PTGDS	prostaglandin D2 synthase 21kDa (brain) [Source:HGNC Symbol;Acc:9592]	protein_coding	5.02886	4.47218	5.41796	2.46205	2.25178	1.975	4.973	2.22961	-1.15733	1.06079e-15	2.3665e-24
ENSG00000118503	TNFAIP3	tumor necrosis factor, alpha-induced protein 3 [Source:HGNC Symbol;Acc:11896]	protein_coding	4.94461	5.19174	5.15187	3.06415	3.07724	2.83935	5.09608	2.99358	-0.767515	1.10134e-15	7.03498e-25
ENSG00000156804	FBXO32	F-box protein 32 [Source:HGNC Symbol;Acc:16731]	protein_coding	1.20424	1.15449	1.09829	0.500768	0.486505	0.51625	1.15234	0.501175	-1.20118	1.11264e-15	9.11456e-29
ENSG00000087589	CASS4	Cas scaffolding protein family member 4 [Source:HGNC Symbol;Acc:15878]	protein_coding	4.36971	4.52844	4.0865	7.04683	6.34696	7.05566	4.32822	6.81648	0.655255	1.26097e-15	1.11426e-20
ENSG00000134109	EDEM1	ER degradation enhancer, mannosidase alpha-like 1 [Source:HGNC Symbol;Acc:18967]	protein_coding	21.8747	21.2882	21.2176	15.4044	14.5678	14.2569	21.4602	14.743	-0.54163	2.08145e-15	1.64629e-18
ENSG00000138623	SEMA7A	semaphorin 7A, GPI membrane anchor (John Milton Hagen blood group) [Source:HGNC Symbol;Acc:10741]	protein_coding	7.33675	7.73324	7.9191	11.9789	10.8929	10.9823	7.66303	11.2847	0.558379	2.82404e-15	1.89913e-19
ENSG00000113916	BCL6	B-cell CLL/lymphoma 6 [Source:HGNC Symbol;Acc:1001]	protein_coding	8.50558	8.64646	8.28044	5.38631	5.39655	4.84735	8.47749	5.21007	-0.702335	3.70465e-15	7.21482e-23
ENSG00000214110	LDHAP4	lactate dehydrogenase A pseudogene 4 [Source:HGNC Symbol;Acc:6539]	pseudogene	15.6475	15.0962	16.9495	24.4817	24.7594	26.8598	15.8977	25.3669	0.674127	4.53414e-15	2.20406e-24
ENSG00000148634	HERC4	HECT and RLD domain containing E3 ubiquitin protein ligase 4 [Source:HGNC Symbol;Acc:24521]	protein_coding	13.029	12.7506	13.0807	17.2378	17.438	17.1918	12.9534	17.2892	0.416534	5.72425e-15	1.81848e-21
ENSG00000130203	APOE	apolipoprotein E [Source:HGNC Symbol;Acc:613]	protein_coding	9.13685	7.36221	8.1035	4.29296	4.04234	4.55367	8.20085	4.29632	-0.932672	9.68794e-15	1.21567e-20
ENSG00000106948	AKNA	AT-hook transcription factor [Source:HGNC Symbol;Acc:24108]	protein_coding	2.55328	2.4707	2.18902	1.38497	1.34083	1.5073	2.40433	1.41103	-0.768888	1.03302e-14	6.21803e-19
ENSG00000117394	SLC2A1	solute carrier family 2 (facilitated glucose transporter), member 1 [Source:HGNC Symbol;Acc:11005]	protein_coding	78.7404	76.5315	75.3909	101.62	98.6311	103.789	76.8876	101.347	0.398479	1.21691e-14	2.61646e-18
ENSG00000134013	LOXL2	lysyl oxidase-like 2 [Source:HGNC Symbol;Acc:6666]	protein_coding	105.981	106.399	100.331	148.449	141.288	135.213	104.237	141.65	0.442466	1.30549e-14	4.58375e-16
ENSG00000135842	FAM129A	family with sequence similarity 129, member A [Source:HGNC Symbol;Acc:16784]	protein_coding	17.2587	17.9781	15.7034	10.4948	11.2963	10.2617	16.98	10.6843	-0.668351	1.4675e-14	1.79785e-19
ENSG00000151012	SLC7A11	solute carrier family 7 (anionic amino acid transporter light chain, xc- system), member 11 [Source:HGNC Symbol;Acc:11059]	protein_coding	30.4463	30.0007	28.6094	20.8104	21.0564	21.7131	29.6855	21.1933	-0.486148	1.81729e-14	9.16552e-17
ENSG00000138347	MYPN	myopalladin [Source:HGNC Symbol;Acc:23246]	protein_coding	2.84461	3.09784	2.53066	4.80535	4.74886	4.56667	2.82437	4.70696	0.736867	2.0778e-14	3.98934e-22
ENSG00000139269	INHBE	inhibin, beta E [Source:HGNC Symbol;Acc:24029]	protein_coding	1.16038	1.30315	1.31783	0.39112	0.314505	0.400819	1.26045	0.368815	-1.77297	2.18481e-14	1.60952e-27
ENSG00000125812	GZF1	GDNF-inducible zinc finger protein 1 [Source:HGNC Symbol;Acc:15808]	protein_coding	5.97318	5.77923	5.67291	3.56913	3.7101	3.56873	5.80844	3.61599	-0.683761	2.35248e-14	9.10254e-24
ENSG00000146197	SCUBE3	signal peptide, CUB domain, EGF-like 3 [Source:HGNC Symbol;Acc:13655]	protein_coding	1.48938	1.47507	1.28137	2.41781	2.40878	2.2758	1.41527	2.36746	0.742262	2.82832e-14	7.84528e-21
ENSG00000172716	SLFN11	schlafen family member 11 [Source:HGNC Symbol;Acc:26633]	protein_coding	14.66	14.8299	14.5063	10.2346	9.59169	10.0475	14.6654	9.95792	-0.5585	2.98139e-14	1.81615e-19
ENSG00000163545	NUAK2	NUAK family, SNF1-like kinase, 2 [Source:HGNC Symbol;Acc:29558]	protein_coding	14.123	13.5603	13.4364	8.92538	8.42819	7.84836	13.7066	8.40064	-0.7063	3.15039e-14	2.57906e-22
ENSG00000108389	MTMR4	myotubularin related protein 4 [Source:HGNC Symbol;Acc:7452]	protein_coding	13.5317	13.6683	12.7206	9.23497	8.77967	9.06555	13.3069	9.02673	-0.559895	3.75454e-14	1.71063e-17
ENSG00000169359	SLC33A1	solute carrier family 33 (acetyl-CoA transporter), member 1 [Source:HGNC Symbol;Acc:95]	protein_coding	11.5374	10.8449	11.6225	7.57982	7.58101	7.04731	11.3349	7.40271	-0.614651	5.92559e-14	2.26275e-19
ENSG00000151892	GFRA1	GDNF family receptor alpha 1 [Source:HGNC Symbol;Acc:4243]	protein_coding	10.7852	11.0999	10.2511	14.5202	13.9657	14.5136	10.712	14.3332	0.420123	6.64733e-14	4.87887e-16
ENSG00000145632	PLK2	polo-like kinase 2 [Source:HGNC Symbol;Acc:19699]	protein_coding	62.8293	63.8718	66.8311	43.0425	47.1508	46.6702	64.5107	45.6211	-0.499836	6.98935e-14	2.01313e-16
ENSG00000114251	WNT5A	wingless-type MMTV integration site family, member 5A [Source:HGNC Symbol;Acc:12784]	protein_coding	30.5058	28.9037	28.4366	38.4038	37.9033	39.2605	29.282	38.5225	0.395686	7.2777e-14	5.27842e-17
ENSG00000105281	SLC1A5	solute carrier family 1 (neutral amino acid transporter), member 5 [Source:HGNC Symbol;Acc:10943]	protein_coding	107.82	105.347	107.274	66.0541	63.2127	75.6041	106.814	68.2903	-0.645343	9.0037e-14	1.5211e-20
ENSG00000113013	HSPA9	heat shock 70kDa protein 9 (mortalin) [Source:HGNC Symbol;Acc:5244]	protein_coding	73.9793	75.0003	78.6985	54.2613	55.479	54.8842	75.8927	54.8748	-0.467817	9.9459e-14	9.12674e-17
ENSG00000228261	RP11-127L20.3		lincRNA	1.40021	2.1676	1.01059	0.108429	0.116936	0.115158	1.52613	0.113508	-3.74902	1.0045e-13	1.48118e-18
ENSG00000127863	TNFRSF19	tumor necrosis factor receptor superfamily, member 19 [Source:HGNC Symbol;Acc:11915]	protein_coding	34.5228	33.3396	35.1992	21.9736	23.8168	24.7898	34.3538	23.5267	-0.546172	1.35732e-13	4.66094e-19
ENSG00000184702	SEPT5	septin 5 [Source:HGNC Symbol;Acc:9164]	protein_coding	5.91568	5.94422	6.13056	3.82	3.42838	3.95213	5.99682	3.7335	-0.683667	1.50194e-13	1.1544e-20
ENSG00000165891	E2F7	E2F transcription factor 7 [Source:HGNC Symbol;Acc:23820]	protein_coding	4.89966	4.82277	4.87152	3.09518	3.15042	2.90644	4.86465	3.05068	-0.673204	1.90715e-13	5.67044e-22
ENSG00000198768	APCDD1L	adenomatosis polyposis coli down-regulated 1-like [Source:HGNC Symbol;Acc:26892]	protein_coding	6.49491	5.86778	5.78079	8.76439	8.77286	9.18991	6.04783	8.90906	0.558856	1.94288e-13	1.40103e-19
ENSG00000114784	EIF1B	eukaryotic translation initiation factor 1B [Source:HGNC Symbol;Acc:30792]	protein_coding	20.061	21.6306	22.7671	14.0229	13.0548	14.7812	21.4863	13.953	-0.622838	2.07683e-13	1.17866e-15
ENSG00000102760	RGCC	regulator of cell cycle [Source:HGNC Symbol;Acc:20369]	protein_coding	54.21	47.1744	54.3256	70.7848	71.5607	78.1375	51.9034	73.4943	0.501805	2.26475e-13	2.03384e-16
ENSG00000076513	ANKRD13A	ankyrin repeat domain 13A [Source:HGNC Symbol;Acc:21268]	protein_coding	26.2855	24.83	24.9253	32.5218	33.8954	33.1529	25.3469	33.1901	0.38894	2.37305e-13	3.99606e-17
ENSG00000143878	RHOB	ras homolog family member B [Source:HGNC Symbol;Acc:668]	protein_coding	51.525	49.5184	51.0217	32.8947	32.2506	36.5661	50.6884	33.9038	-0.580207	2.60392e-13	3.83766e-20
ENSG00000116761	CTH	cystathionase (cystathionine gamma-lyase) [Source:HGNC Symbol;Acc:2501]	protein_coding	2.02898	2.26393	2.39628	0.822727	0.88959	0.887443	2.22973	0.866587	-1.36345	3.34309e-13	3.03421e-24
ENSG00000147224	PRPS1	phosphoribosyl pyrophosphate synthetase 1 [Source:HGNC Symbol;Acc:9462]	protein_coding	28.0989	26.8789	29.7073	38.655	38.984	37.6162	28.2284	38.4184	0.444652	3.37452e-13	8.66716e-18
ENSG00000164176	EDIL3	EGF-like repeats and discoidin I-like domains 3 [Source:HGNC Symbol;Acc:3173]	protein_coding	24.9927	25.7263	25.4017	36.0006	38.9564	33.5489	25.3736	36.1687	0.511413	3.92596e-13	1.15997e-17
ENSG00000139514	SLC7A1	solute carrier family 7 (cationic amino acid transporter, y+ system), member 1 [Source:HGNC Symbol;Acc:11057]	protein_coding	14.1881	14.7628	13.2947	9.97329	9.63699	9.41086	14.0819	9.67371	-0.541699	3.89533e-13	6.61655e-15
ENSG00000166123	GPT2	glutamic pyruvate transaminase (alanine aminotransferase) 2 [Source:HGNC Symbol;Acc:18062]	protein_coding	6.72603	6.51208	6.61018	4.29702	4.16146	4.57322	6.6161	4.3439	-0.606989	4.34556e-13	6.52231e-20
ENSG00000183508	FAM46C	family with sequence similarity 46, member C [Source:HGNC Symbol;Acc:24712]	protein_coding	16.0932	16.4837	16.5101	21.7026	21.1242	22.6895	16.3623	21.8388	0.416512	4.42844e-13	4.94616e-18
ENSG00000080823	MOK	MOK protein kinase [Source:HGNC Symbol;Acc:9833]	protein_coding	1.92345	1.78924	1.92625	2.8974	2.76711	2.68508	1.87965	2.78319	0.566281	5.34206e-13	1.39728e-19
ENSG00000259884	RP11-1100L3.8		lincRNA	15.3289	12.5914	14.4639	8.00395	7.37616	6.6637	14.1281	7.34793	-0.943153	5.40605e-13	1.68754e-17
ENSG00000034063	UHRF1	ubiquitin-like with PHD and ring finger domains 1 [Source:HGNC Symbol;Acc:12556]	processed_transcript	12.1326	11.6582	11.6091	15.7557	16.1167	16.7698	11.8	16.2141	0.458459	5.93237e-13	1.55535e-19
ENSG00000158270	COLEC12	collectin sub-family member 12 [Source:HGNC Symbol;Acc:16016]	protein_coding	7.3271	7.22978	7.90508	4.47562	4.67193	4.57462	7.48732	4.57405	-0.710976	6.20444e-13	7.51627e-22
ENSG00000170396	ZNF804A	zinc finger protein 804A [Source:HGNC Symbol;Acc:21711]	protein_coding	3.77047	4.1194	4.17983	2.2982	2.34293	2.46543	4.02323	2.36885	-0.764168	6.48549e-13	1.23086e-20
ENSG00000067064	IDI1	isopentenyl-diphosphate delta isomerase 1 [Source:HGNC Symbol;Acc:5387]	protein_coding	23.6786	22.5284	23.5903	15.702	16.4584	16.5679	23.2658	16.2428	-0.518411	9.05186e-13	3.52437e-18
ENSG00000117385	LEPRE1	leucine proline-enriched proteoglycan (leprecan) 1 [Source:HGNC Symbol;Acc:19316]	protein_coding	29.652	29.6417	30.0356	38.2086	37.7613	40.39	29.7764	38.7867	0.38139	9.1004e-13	4.72443e-17
ENSG00000149201	CCDC81	coiled-coil domain containing 81 [Source:HGNC Symbol;Acc:26281]	protein_coding	0.867915	0.702125	0.777959	1.61171	1.65101	1.61987	0.782666	1.62753	1.05622	1.06248e-12	7.61531e-24
ENSG00000116991	SIPA1L2	signal-induced proliferation-associated 1 like 2 [Source:HGNC Symbol;Acc:23800]	protein_coding	2.67226	2.97694	2.29409	1.4052	1.56583	1.43059	2.64776	1.46721	-0.8517	1.15842e-12	2.87606e-14
ENSG00000102554	KLF5	Kruppel-like factor 5 (intestinal) [Source:HGNC Symbol;Acc:6349]	protein_coding	3.80285	3.60055	3.7336	5.9527	5.49322	5.73458	3.71233	5.72683	0.625411	1.20429e-12	2.68347e-21
ENSG00000111186	WNT5B	wingless-type MMTV integration site family, member 5B [Source:HGNC Symbol;Acc:16265]	protein_coding	30.2313	28.1002	29.8667	38.6227	37.7039	39.2998	29.3994	38.5421	0.39065	1.4373e-12	7.32331e-17
ENSG00000113448	PDE4D	phosphodiesterase 4D, cAMP-specific [Source:HGNC Symbol;Acc:8783]	protein_coding	0.943517	0.91704	0.974573	0.568413	0.502697	0.515682	0.945043	0.528931	-0.837301	1.62587e-12	1.28706e-21
ENSG00000152578	GRIA4	glutamate receptor, ionotropic, AMPA 4 [Source:HGNC Symbol;Acc:4574]	protein_coding	0.870589	0.928749	0.938782	0.428823	0.489576	0.441274	0.912706	0.453224	-1.00993	1.64186e-12	6.65058e-22
ENSG00000143882	ATP6V1C2	ATPase, H+ transporting, lysosomal 42kDa, V1 subunit C2 [Source:HGNC Symbol;Acc:18264]	protein_coding	1.12905	1.03092	1.03712	0.323642	0.293659	0.388347	1.0657	0.335216	-1.66864	2.73973e-12	5.02047e-24
ENSG00000166598	HSP90B1	heat shock protein 90kDa beta (Grp94), member 1 [Source:HGNC Symbol;Acc:12028]	protein_coding	615.731	623.643	653.41	465.978	469.179	473.482	630.928	469.546	-0.426208	2.94089e-12	1.21493e-14
ENSG00000183160	TMEM119	transmembrane protein 119 [Source:HGNC Symbol;Acc:27884]	protein_coding	28.4439	28.5037	28.0792	20.1043	19.0213	20.6786	28.3423	19.9347	-0.507671	3.35361e-12	2.03384e-16
ENSG00000099194	SCD	stearoyl-CoA desaturase (delta-9-desaturase) [Source:HGNC Symbol;Acc:10571]	protein_coding	92.1606	96.8596	90.7491	67.1305	67.353	71.555	93.2564	68.6795	-0.441324	1.71686e-12	1.64849e-12
ENSG00000143320	CRABP2	cellular retinoic acid binding protein 2 [Source:HGNC Symbol;Acc:2339]	protein_coding	14.8615	15.0929	14.9529	8.18123	8.6203	9.38811	14.9691	8.72988	-0.777954	3.52898e-12	7.68796e-21
ENSG00000118523	CTGF	connective tissue growth factor [Source:HGNC Symbol;Acc:2500]	protein_coding	971.374	949.5	1016.06	715.834	738.068	735.479	978.979	729.794	-0.42379	3.87005e-12	1.99824e-14
ENSG00000141526	SLC16A3	solute carrier family 16, member 3 (monocarboxylic acid transporter 4) [Source:HGNC Symbol;Acc:10924]	protein_coding	114.548	107.386	112.6	144.923	135.924	148.742	111.511	143.197	0.360806	4.07122e-12	2.20532e-13
ENSG00000166173	LARP6	La ribonucleoprotein domain family, member 6 [Source:HGNC Symbol;Acc:24012]	protein_coding	9.08964	8.99273	9.54078	6.09744	6.05452	6.60679	9.20772	6.25292	-0.558314	4.69961e-12	2.88099e-17
ENSG00000176014	TUBB6	tubulin, beta 6 class V [Source:HGNC Symbol;Acc:20776]	protein_coding	138.07	133.232	144.64	173.351	174.859	185.47	138.648	177.893	0.359589	5.58151e-12	1.93314e-14
ENSG00000137672	TRPC6	transient receptor potential cation channel, subfamily C, member 6 [Source:HGNC Symbol;Acc:12338]	protein_coding	1.63706	1.44052	1.6515	2.70885	2.6494	2.46527	1.57636	2.60784	0.726261	5.94018e-12	6.21803e-19
ENSG00000186594	MIR22HG	MIR22 host gene (non-protein coding) [Source:HGNC Symbol;Acc:28219]	lincRNA	31.2923	32.1166	36.7491	22.416	19.88	21.61	33.386	21.302	-0.648255	5.94018e-12	6.45661e-15
ENSG00000213626	LBH	limb bud and heart development homolog (mouse) [Source:HGNC Symbol;Acc:29532]	protein_coding	54.198	57.1674	54.1078	69.9201	70.3534	72.4997	55.1577	70.9244	0.362719	5.94018e-12	3.66049e-14
ENSG00000163734	CXCL3	chemokine (C-X-C motif) ligand 3 [Source:HGNC Symbol;Acc:4604]	protein_coding	0.845646	0.945213	1.11911	0.0932319	0.138252	0.0495092	0.969988	0.0936644	-3.37239	6.30202e-12	1.61407e-35
ENSG00000161544	CYGB	cytoglobin [Source:HGNC Symbol;Acc:16505]	protein_coding	18.7797	17.6248	17.6549	11.993	11.4216	11.9237	18.0198	11.7794	-0.613318	6.30202e-12	9.65803e-19
ENSG00000092421	SEMA6A	sema domain, transmembrane domain (TM), and cytoplasmic domain, (semaphorin) 6A [Source:HGNC Symbol;Acc:10738]	protein_coding	1.85209	1.77959	1.47996	2.84944	2.89176	2.60213	1.70388	2.78111	0.706835	6.60977e-12	9.55269e-17
ENSG00000122786	CALD1	caldesmon 1 [Source:HGNC Symbol;Acc:1441]	protein_coding	94.9663	98.921	94.3524	123.773	129.64	119.957	96.0799	124.457	0.373339	6.60977e-12	1.72953e-13
ENSG00000170017	ALCAM	activated leukocyte cell adhesion molecule [Source:HGNC Symbol;Acc:400]	protein_coding	53.8676	55.3379	54.015	67.7733	71.9782	68.9251	54.4068	69.5589	0.354446	7.80275e-12	2.9518e-14
ENSG00000173812	EIF1	eukaryotic translation initiation factor 1 [Source:HGNC Symbol;Acc:3249]	protein_coding	190.062	193.036	212.021	138.88	128.865	144.907	198.373	137.551	-0.528252	8.21119e-12	1.20008e-14
ENSG00000211459	J01415.24		Mt_rRNA	457.237	495.017	463.279	340.617	337.915	315.102	471.844	331.212	-0.510558	1.00168e-11	9.30492e-14
ENSG00000140545	MFGE8	milk fat globule-EGF factor 8 protein [Source:HGNC Symbol;Acc:7036]	protein_coding	147.03	150.222	149.426	192.151	188.675	184.047	148.893	188.291	0.338689	1.00737e-11	9.8892e-14
ENSG00000087116	ADAMTS2	ADAM metallopeptidase with thrombospondin type 1 motif, 2 [Source:HGNC Symbol;Acc:218]	protein_coding	19.1359	17.8085	16.6162	24.2918	24.2647	23.4028	17.8535	23.9865	0.426009	1.00804e-11	1.90411e-13
ENSG00000134684	YARS	tyrosyl-tRNA synthetase [Source:HGNC Symbol;Acc:12840]	protein_coding	22.43	22.2261	22.7672	15.9458	16.3938	16.9308	22.4744	16.4235	-0.452528	1.05916e-11	6.72493e-16
ENSG00000185112	FAM43A	family with sequence similarity 43, member A [Source:HGNC Symbol;Acc:26888]	protein_coding	9.89282	9.17933	9.29195	5.99371	5.79804	6.54933	9.4547	6.11369	-0.628987	1.34374e-11	4.87085e-17
ENSG00000079102	RUNX1T1	runt-related transcription factor 1; translocated to, 1 (cyclin D-related) [Source:HGNC Symbol;Acc:1535]	protein_coding	1.18266	1.26883	1.19435	0.71117	0.66182	0.771552	1.21528	0.714847	-0.765584	1.51192e-11	7.58981e-18
ENSG00000168016	TRANK1	tetratricopeptide repeat and ankyrin repeat containing 1 [Source:HGNC Symbol;Acc:29011]	protein_coding	6.33708	6.61257	5.57812	4.16095	4.16268	4.00606	6.17592	4.1099	-0.587553	1.6504e-11	6.62996e-13
ENSG00000174136	RGMB	RGM domain family, member B [Source:HGNC Symbol;Acc:26896]	protein_coding	45.2067	43.4151	46.3345	62.6382	63.1531	56.532	44.9854	60.7745	0.434007	2.00027e-11	7.11598e-15
ENSG00000189057	FAM111B	family with sequence similarity 111, member B [Source:HGNC Symbol;Acc:24200]	protein_coding	2.39959	2.36667	2.63596	3.81366	3.96248	4.25829	2.46741	4.01148	0.701137	2.17287e-11	7.87706e-20
ENSG00000163110	PDLIM5	PDZ and LIM domain 5 [Source:HGNC Symbol;Acc:17468]	protein_coding	6.88176	6.94213	6.68415	9.26175	8.81214	8.8289	6.83601	8.9676	0.391566	2.23256e-11	1.31443e-14
ENSG00000110619	CARS	cysteinyl-tRNA synthetase [Source:HGNC Symbol;Acc:1493]	protein_coding	12.5325	12.3734	12.3911	8.64875	9.02224	9.38037	12.4323	9.01712	-0.463354	2.23464e-11	3.55554e-15
ENSG00000092964	DPYSL2	dihydropyrimidinase-like 2 [Source:HGNC Symbol;Acc:3014]	protein_coding	23.4734	23.3496	22.6261	16.3919	15.0562	17.0393	23.1497	16.1625	-0.518347	2.49995e-11	3.0078e-15
ENSG00000163017	ACTG2	actin, gamma 2, smooth muscle, enteric [Source:HGNC Symbol;Acc:145]	protein_coding	109.953	111.088	114.898	143.254	141.817	139.841	111.98	141.637	0.338966	2.52977e-11	2.34624e-14
ENSG00000106105	GARS	glycyl-tRNA synthetase [Source:HGNC Symbol;Acc:4162]	protein_coding	92.8561	89.7479	94.8651	65.5574	71.0597	70.3036	92.4897	68.9736	-0.423249	2.61208e-11	1.40468e-12
ENSG00000183963	SMTN	smoothelin [Source:HGNC Symbol;Acc:11126]	protein_coding	10.7108	9.58986	9.66136	13.2435	12.8775	12.9407	9.98734	13.0206	0.382622	6.46417e-11	1.05188e-12
ENSG00000130635	COL5A1	collagen, type V, alpha 1 [Source:HGNC Symbol;Acc:2209]	protein_coding	70.5837	68.0714	61.9247	89.9982	83.877	88.1676	66.8599	87.3476	0.385627	2.43551e-11	4.31326e-11
ENSG00000177469	PTRF	polymerase I and transcript release factor [Source:HGNC Symbol;Acc:9688]	protein_coding	221.662	220.051	218.049	275.973	270.862	280.292	219.921	275.709	0.326164	6.79889e-11	2.13597e-14
ENSG00000153956	CACNA2D1	calcium channel, voltage-dependent, alpha 2/delta subunit 1 [Source:HGNC Symbol;Acc:1399]	protein_coding	6.15953	6.24452	6.14972	8.23541	8.30716	8.08051	6.18459	8.20769	0.408299	7.30638e-11	3.45541e-16
ENSG00000152409	JMY	junction mediating and regulatory protein, p53 cofactor [Source:HGNC Symbol;Acc:28916]	protein_coding	2.43179	2.60496	2.19218	1.50023	1.41447	1.45013	2.40964	1.45494	-0.727858	7.56326e-11	2.98133e-15
ENSG00000167842	MIS12	MIS12, MIND kinetochore complex component, homolog (S. pombe) [Source:HGNC Symbol;Acc:24967]	protein_coding	9.15422	9.43433	10.0766	5.89675	6.16791	6.28247	9.55506	6.11571	-0.643745	7.8981e-11	1.52082e-17
ENSG00000184678	HIST2H2BE	histone cluster 2, H2be [Source:HGNC Symbol;Acc:4760]	protein_coding	8.11217	7.81388	8.54247	4.3554	4.49138	5.26324	8.15617	4.70334	-0.794206	8.89759e-11	3.29526e-19
ENSG00000131386	GALNTL2	UDP-N-acetyl-alpha-D-galactosamine:polypeptide N-acetylgalactosaminyltransferase-like 2 [Source:HGNC Symbol;Acc:21531]	protein_coding	2.39139	2.66334	2.43846	3.77771	3.85017	3.63205	2.49773	3.75331	0.587546	8.89759e-11	1.27494e-16
ENSG00000135048	TMEM2	transmembrane protein 2 [Source:HGNC Symbol;Acc:11869]	protein_coding	5.2573	5.43866	5.42113	7.05655	7.31639	7.13383	5.37237	7.16892	0.416198	8.89759e-11	2.7337e-16
ENSG00000164305	CASP3	caspase 3, apoptosis-related cysteine peptidase [Source:HGNC Symbol;Acc:1504]	protein_coding	16.3248	15.7132	16.5375	21.5088	22.5884	20.9755	16.1918	21.6909	0.421825	9.75356e-11	4.40577e-15
ENSG00000153989	NUS1	nuclear undecaprenyl pyrophosphate synthase 1 homolog (S. cerevisiae) [Source:HGNC Symbol;Acc:21042]	protein_coding	22.8538	21.859	23.9732	16.2329	17.058	16.599	22.8953	16.6299	-0.461272	1.02966e-10	9.9616e-14
ENSG00000215012	C22orf29	chromosome 22 open reading frame 29 [Source:HGNC Symbol;Acc:26112]	protein_coding	4.04398	3.72577	3.97667	5.85399	5.21052	5.42603	3.91547	5.49685	0.489418	1.09607e-10	3.13835e-14
ENSG00000116717	GADD45A	growth arrest and DNA-damage-inducible, alpha [Source:HGNC Symbol;Acc:4095]	protein_coding	51.9731	49.4305	54.4626	31.7872	33.9146	37.8327	51.9554	34.5115	-0.590197	1.10575e-10	2.18429e-16
ENSG00000145335	SNCA	synuclein, alpha (non A4 component of amyloid precursor) [Source:HGNC Symbol;Acc:11138]	protein_coding	2.22024	2.31999	2.39636	1.16568	1.31415	1.17777	2.3122	1.2192	-0.923332	1.21492e-10	6.78724e-19
ENSG00000168542	COL3A1	collagen, type III, alpha 1 [Source:HGNC Symbol;Acc:2201]	protein_coding	219.578	224.871	215.312	276.182	279.162	267.298	219.92	274.214	0.318323	1.15761e-10	1.50537e-11
ENSG00000116273	PHF13	PHD finger protein 13 [Source:HGNC Symbol;Acc:22983]	protein_coding	6.41109	6.30791	6.72244	9.43641	8.63725	9.20731	6.48048	9.09365	0.488759	1.43099e-10	1.3164e-15
ENSG00000102804	TSC22D1	TSC22 domain family, member 1 [Source:HGNC Symbol;Acc:16826]	protein_coding	22.837	22.1947	22.7485	16.3431	17.0485	15.6706	22.5934	16.3541	-0.46625	1.51727e-10	6.04435e-14
ENSG00000148339	SLC25A25	solute carrier family 25 (mitochondrial carrier; phosphate carrier), member 25 [Source:HGNC Symbol;Acc:20663]	protein_coding	10.2013	9.83719	10.3623	7.27971	6.92889	6.82356	10.1336	7.01072	-0.531515	1.52374e-10	1.33812e-15
ENSG00000140105	WARS	tryptophanyl-tRNA synthetase [Source:HGNC Symbol;Acc:12729]	protein_coding	44.7609	45.4967	45.546	33.0236	33.6092	35.0594	45.2679	33.8974	-0.417313	1.80097e-10	2.78868e-13
ENSG00000170961	HAS2	hyaluronan synthase 2 [Source:HGNC Symbol;Acc:4819]	protein_coding	3.74307	3.95045	3.92752	6.32843	6.34743	5.42179	3.87368	6.03255	0.639063	1.80911e-10	3.44061e-16
ENSG00000101057	MYBL2	v-myb myeloblastosis viral oncogene homolog (avian)-like 2 [Source:HGNC Symbol;Acc:7548]	protein_coding	7.09147	6.93922	6.82996	9.71927	10.1699	10.2508	6.95355	10.0467	0.530895	2.22927e-10	4.66094e-19
ENSG00000107984	DKK1	dickkopf 1 homolog (Xenopus laevis) [Source:HGNC Symbol;Acc:2891]	protein_coding	19.6221	17.8372	20.064	26.0337	25.7653	25.137	19.1744	25.6453	0.419512	2.22927e-10	9.30492e-14
ENSG00000144583	MARCH4	membrane-associated ring finger (C3HC4) 4, E3 ubiquitin protein ligase [Source:HGNC Symbol;Acc:29269]	protein_coding	10.6565	10.8945	9.65082	14.4543	14.3993	13.6801	10.4006	14.1779	0.446979	2.5973e-10	7.97342e-13
ENSG00000174807	CD248	CD248 molecule, endosialin [Source:HGNC Symbol;Acc:18219]	protein_coding	281.556	277.443	271.926	353.405	328.674	350.498	276.975	344.193	0.31346	2.22927e-10	5.24507e-11
ENSG00000099860	GADD45B	growth arrest and DNA-damage-inducible, beta [Source:HGNC Symbol;Acc:4096]	protein_coding	24.5649	25.8459	25.4757	17.3931	17.2406	16.5391	25.2955	17.0576	-0.568467	3.23412e-10	1.48122e-15
ENSG00000136158	SPRY2	sprouty homolog 2 (Drosophila) [Source:HGNC Symbol;Acc:11270]	protein_coding	27.2213	26.3796	29.1353	19.5308	18.2904	16.7931	27.5787	18.2048	-0.59924	3.44153e-10	3.37248e-15
ENSG00000156650	KAT6B	K(lysine) acetyltransferase 6B [Source:HGNC Symbol;Acc:17582]	protein_coding	4.94838	5.04156	4.31203	3.14081	3.40994	3.22146	4.76733	3.2574	-0.549458	3.29e-10	3.48434e-11
ENSG00000166482	MFAP4	microfibrillar-associated protein 4 [Source:HGNC Symbol;Acc:7035]	protein_coding	52.8713	52.4673	54.9925	39.5992	38.0949	39.1795	53.4437	38.9579	-0.456103	3.65327e-10	1.7851e-14
ENSG00000164463	CREBRF	CREB3 regulatory factor [Source:HGNC Symbol;Acc:24050]	protein_coding	2.69721	2.66556	2.51309	1.75446	1.79136	1.73743	2.62528	1.76108	-0.57601	3.88093e-10	1.33734e-15
ENSG00000185585	OLFML2A	olfactomedin-like 2A [Source:HGNC Symbol;Acc:27270]	protein_coding	13.2198	13.5445	12.5765	9.84114	8.99599	9.52285	13.1136	9.45333	-0.47217	4.20883e-10	2.29202e-11
ENSG00000106991	ENG	endoglin [Source:HGNC Symbol;Acc:3349]	protein_coding	58.8976	57.7988	56.2922	72.2798	70.8251	74.0689	57.6629	72.3913	0.328173	4.62666e-10	7.36948e-13
ENSG00000132688	NES	nestin [Source:HGNC Symbol;Acc:7756]	protein_coding	73.1833	72.9389	72.1918	88.98	91.5557	92.2294	72.7713	90.9217	0.321254	5.01011e-10	7.07399e-14
ENSG00000137936	BCAR3	breast cancer anti-estrogen resistance 3 [Source:HGNC Symbol;Acc:973]	protein_coding	7.06705	7.03585	7.45933	10.3482	10.101	9.28684	7.18741	9.91202	0.463706	5.392e-10	2.84896e-14
ENSG00000156030	C14orf43	chromosome 14 open reading frame 43 [Source:HGNC Symbol;Acc:19853]	protein_coding	4.68204	4.32471	4.13399	3.13913	2.94529	3.14086	4.38025	3.07509	-0.510383	5.392e-10	6.94671e-12
ENSG00000149591	TAGLN	transgelin [Source:HGNC Symbol;Acc:11553]	protein_coding	313.629	330.52	336.594	414.47	426.537	395.613	326.914	412.207	0.334456	5.59445e-10	5.63151e-11
ENSG00000099958	DERL3	derlin 3 [Source:HGNC Symbol;Acc:14236]	protein_coding	0.427305	0.45915	0.484868	0.0926499	0.110205	0.0795884	0.457108	0.0941477	-2.27954	7.08452e-10	1.02622e-19
ENSG00000129910	CDH15	cadherin 15, type 1, M-cadherin (myotubule) [Source:HGNC Symbol;Acc:1754]	protein_coding	0.591015	0.529802	0.536581	0.165398	0.168733	0.148364	0.552466	0.160832	-1.78033	7.29445e-10	6.09419e-20
ENSG00000166471	TMEM41B	transmembrane protein 41B [Source:HGNC Symbol;Acc:28948]	protein_coding	11.6877	10.9226	11.6874	8.05164	7.22143	8.17994	11.4326	7.81767	-0.548341	7.40511e-10	3.10549e-14
ENSG00000139645	ANKRD52	ankyrin repeat domain 52 [Source:HGNC Symbol;Acc:26614]	protein_coding	15.6104	15.3769	13.7365	19.6068	19.5351	19.7426	14.9079	19.6282	0.39685	7.56074e-10	4.22211e-12
ENSG00000139318	DUSP6	dual specificity phosphatase 6 [Source:HGNC Symbol;Acc:3072]	protein_coding	22.4941	21.1634	23.1316	15.3798	15.6304	13.586	22.263	14.8654	-0.582693	7.70808e-10	3.55554e-15
ENSG00000149968	MMP3	matrix metallopeptidase 3 (stromelysin 1, progelatinase) [Source:HGNC Symbol;Acc:7173]	protein_coding	1.63062	1.57226	1.62624	2.85877	3.527	3.16494	1.60971	3.18357	0.983846	8.84488e-10	1.29132e-16
ENSG00000115594	IL1R1	interleukin 1 receptor, type I [Source:HGNC Symbol;Acc:5993]	protein_coding	19.8696	19.2437	18.4085	14.3558	14.0096	14.1146	19.174	14.16	-0.437328	9.14261e-10	5.54919e-12
ENSG00000088448	ANKRD10	ankyrin repeat domain 10 [Source:HGNC Symbol;Acc:20265]	protein_coding	16.2698	15.1752	16.7471	11.731	11.2912	11.5054	16.064	11.5092	-0.481044	1.01152e-09	3.89611e-13
ENSG00000261040	CTD-2319I12.1		processed_transcript	50.162	47.2528	52.6789	70.4416	68.2568	70.7214	50.0313	69.8066	0.480534	1.02293e-09	7.56447e-16
ENSG00000106070	GRB10	growth factor receptor-bound protein 10 [Source:HGNC Symbol;Acc:4564]	protein_coding	3.36152	3.29755	3.34342	2.12416	2.19322	2.43608	3.33416	2.25115	-0.566661	1.07283e-09	1.06297e-14
ENSG00000197565	COL4A6	collagen, type IV, alpha 6 [Source:HGNC Symbol;Acc:2208]	protein_coding	4.37629	4.74229	4.09636	2.94445	2.98192	2.98631	4.40498	2.97089	-0.568238	1.09299e-09	7.88055e-13
ENSG00000157693	C9orf91	chromosome 9 open reading frame 91 [Source:HGNC Symbol;Acc:24513]	protein_coding	2.54864	2.44122	2.48134	1.37288	1.47827	1.47299	2.4904	1.44138	-0.788929	1.10711e-09	4.39851e-18
ENSG00000130508	PXDN	peroxidasin homolog (Drosophila) [Source:HGNC Symbol;Acc:14966]	protein_coding	139.182	143.011	123.266	181.037	178.732	170.993	135.153	176.921	0.388506	1.997e-10	9.12627e-10
ENSG00000160200	CBS	cystathionine-beta-synthase [Source:HGNC Symbol;Acc:1550]	protein_coding	15.0949	14.8722	14.2506	10.4304	10.261	11.4234	14.7392	10.7049	-0.461386	1.10711e-09	6.69694e-12
ENSG00000105825	TFPI2	tissue factor pathway inhibitor 2 [Source:HGNC Symbol;Acc:11761]	protein_coding	14.6424	15.3197	15.0519	20.1444	19.9194	23.0097	15.0047	21.0245	0.486656	1.17847e-09	7.84243e-15
ENSG00000100297	MCM5	minichromosome maintenance complex component 5 [Source:HGNC Symbol;Acc:6948]	protein_coding	6.0591	5.89418	5.97325	7.76994	7.88431	8.46054	5.97551	8.03826	0.427822	1.2812e-09	3.90647e-15
ENSG00000105732	ZNF574	zinc finger protein 574 [Source:HGNC Symbol;Acc:26166]	protein_coding	2.49505	2.56234	2.6119	4.40343	3.69875	4.14662	2.55643	4.08293	0.675474	1.2812e-09	1.01747e-14
ENSG00000165312	OTUD1	OTU domain containing 1 [Source:HGNC Symbol;Acc:27346]	protein_coding	5.15257	4.99476	5.24015	3.19865	2.99421	3.21355	5.12916	3.13547	-0.710041	1.28175e-09	6.29772e-18
ENSG00000092969	TGFB2	transforming growth factor, beta 2 [Source:HGNC Symbol;Acc:11768]	protein_coding	3.37128	3.28045	3.28395	5.23329	4.90538	4.52688	3.31189	4.88852	0.561742	1.36363e-09	8.61604e-15
ENSG00000126010	GRPR	gastrin-releasing peptide receptor [Source:HGNC Symbol;Acc:4609]	protein_coding	3.74272	4.44114	3.61972	7.72187	7.33013	6.39289	3.93453	7.1483	0.861409	1.55855e-09	1.07644e-15
ENSG00000113361	CDH6	cadherin 6, type 2, K-cadherin (fetal kidney) [Source:HGNC Symbol;Acc:1765]	protein_coding	2.96493	2.8947	2.58663	3.85219	3.90661	3.85166	2.81542	3.87015	0.459039	1.77799e-09	1.65891e-13
ENSG00000158050	DUSP2	dual specificity phosphatase 2 [Source:HGNC Symbol;Acc:3068]	protein_coding	2.32116	1.7737	2.37412	0.610365	0.274273	0.326967	2.15633	0.403868	-2.41662	1.81353e-09	8.18261e-28
ENSG00000150938	CRIM1	cysteine rich transmembrane BMP regulator 1 (chordin-like) [Source:HGNC Symbol;Acc:2359]	protein_coding	87.4165	89.2169	81.5541	114.834	113.476	105.951	86.0625	111.42	0.372551	1.78598e-09	5.57508e-11
ENSG00000139278	GLIPR1	GLI pathogenesis-related 1 [Source:HGNC Symbol;Acc:17001]	protein_coding	18.3589	19.5058	19.067	23.3859	24.9816	23.7042	18.9772	24.0239	0.340202	2.37777e-09	2.52542e-11
ENSG00000109814	UGDH	UDP-glucose 6-dehydrogenase [Source:HGNC Symbol;Acc:12525]	protein_coding	22.92	22.3988	21.8843	17.0108	15.4787	16.5606	22.401	16.35	-0.45427	2.49322e-09	1.73224e-11
ENSG00000091986	CCDC80	coiled-coil domain containing 80 [Source:HGNC Symbol;Acc:30649]	protein_coding	98.4302	106.142	98.8637	131.48	135.366	124.663	101.145	130.503	0.367652	2.51416e-09	3.0414e-11
ENSG00000118515	SGK1	serum/glucocorticoid regulated kinase 1 [Source:HGNC Symbol;Acc:10810]	protein_coding	13.8335	13.3692	14.1632	8.88647	10.1207	7.30335	13.7886	8.77018	-0.652801	1.09197e-09	1.45652e-09
ENSG00000112576	CCND3	cyclin D3 [Source:HGNC Symbol;Acc:1585]	protein_coding	10.8917	10.4565	10.8317	13.7674	13.3605	14.6084	10.7266	13.9121	0.375145	2.56402e-09	3.83884e-13
ENSG00000214293	RSBN1L-AS1	RSBN1L antisense RNA 1 [Source:HGNC Symbol;Acc:44173]	lincRNA	2.924	2.59201	3.01577	1.66173	1.46643	1.43528	2.84392	1.52115	-0.902723	2.68133e-09	3.55554e-15
ENSG00000148926	ADM	adrenomedullin [Source:HGNC Symbol;Acc:259]	protein_coding	51.3816	49.6593	51.7017	62.1787	63.9974	69.2492	50.9142	65.1418	0.355514	2.94417e-09	6.34254e-13
ENSG00000067141	NEO1	neogenin 1 [Source:HGNC Symbol;Acc:7754]	protein_coding	23.5921	24.1585	21.7072	29.5604	30.2359	29.1401	23.1526	29.6455	0.356637	2.90288e-09	9.69874e-11
ENSG00000011426	ANLN	anillin, actin binding protein [Source:HGNC Symbol;Acc:14082]	protein_coding	22.9755	22.9569	22.893	29.3461	32.7044	29.2515	22.9418	30.434	0.407705	3.56975e-09	8.37479e-14
ENSG00000070404	FSTL3	follistatin-like 3 (secreted glycoprotein) [Source:HGNC Symbol;Acc:3973]	protein_coding	27.169	25.5765	26.7603	36.4412	32.5763	34.7499	26.5019	34.5891	0.38422	3.75359e-09	5.50805e-12
ENSG00000156802	ATAD2	ATPase family, AAA domain containing 2 [Source:HGNC Symbol;Acc:30123]	protein_coding	5.12506	4.95951	4.90888	6.37968	6.97426	6.66373	4.99782	6.67256	0.416941	3.77169e-09	9.30938e-14
ENSG00000137269	LRRC1	leucine rich repeat containing 1 [Source:HGNC Symbol;Acc:14307]	protein_coding	3.71341	3.80593	3.97117	2.41547	2.44351	2.57487	3.83017	2.47795	-0.628261	4.52103e-09	4.77689e-16
ENSG00000138356	AOX1	aldehyde oxidase 1 [Source:HGNC Symbol;Acc:553]	protein_coding	8.46106	8.65167	8.40885	10.7987	11.3626	11.2196	8.50719	11.127	0.387306	4.77732e-09	8.0902e-14
ENSG00000131080	EDA2R	ectodysplasin A2 receptor [Source:HGNC Symbol;Acc:17756]	protein_coding	8.16358	9.01934	9.2237	5.91506	6.23332	5.93008	8.80221	6.02615	-0.546628	4.78227e-09	6.30343e-12
ENSG00000151388	ADAMTS12	ADAM metallopeptidase with thrombospondin type 1 motif, 12 [Source:HGNC Symbol;Acc:14605]	protein_coding	7.92682	8.69198	7.56823	11.5966	11.66	10.6485	8.06235	11.3017	0.487266	4.8299e-09	1.35929e-13
ENSG00000143387	CTSK	cathepsin K [Source:HGNC Symbol;Acc:2536]	protein_coding	20.5122	20.1169	22.7436	14.6034	14.691	15.1663	21.1242	14.8202	-0.511331	5.39372e-09	4.15827e-12
ENSG00000163376	KBTBD8	kelch repeat and BTB (POZ) domain containing 8 [Source:HGNC Symbol;Acc:30691]	protein_coding	1.52985	1.60171	1.67649	0.772533	0.941408	0.770649	1.60268	0.828197	-0.952444	5.55678e-09	1.07199e-15
ENSG00000137962	ARHGAP29	Rho GTPase activating protein 29 [Source:HGNC Symbol;Acc:30207]	protein_coding	4.27165	4.34632	4.00665	5.39993	5.51173	5.25279	4.20821	5.38815	0.356584	5.57054e-09	6.93744e-11
ENSG00000175166	PSMD2	proteasome (prosome, macropain) 26S subunit, non-ATPase, 2 [Source:HGNC Symbol;Acc:9559]	protein_coding	74.0871	78.1023	77.7646	92.1364	96.6649	94.9841	76.6513	94.5951	0.303455	5.57054e-09	7.01874e-11
ENSG00000113407	TARS	threonyl-tRNA synthetase [Source:HGNC Symbol;Acc:11572]	protein_coding	32.9952	33.3334	34.4728	24.6825	26.0016	25.7985	33.6004	25.4942	-0.39831	5.82315e-09	1.97482e-11
ENSG00000172260	NEGR1	neuronal growth regulator 1 [Source:HGNC Symbol;Acc:17302]	protein_coding	3.2381	3.0307	3.14324	4.36765	4.39852	4.32307	3.13735	4.36308	0.475802	5.90798e-09	4.07755e-16
ENSG00000177707	PVRL3	poliovirus receptor-related 3 [Source:HGNC Symbol;Acc:17664]	protein_coding	18.438	18.4681	18.8501	22.5215	24.0107	23.77	18.5854	23.4341	0.33444	5.90798e-09	6.6755e-13
ENSG00000187955	COL14A1	collagen, type XIV, alpha 1 [Source:HGNC Symbol;Acc:2191]	protein_coding	1.55164	1.76186	1.64012	1.01171	1.07742	0.939229	1.6512	1.00945	-0.709944	6.29917e-09	1.05188e-12
ENSG00000167900	TK1	thymidine kinase 1, soluble [Source:HGNC Symbol;Acc:11830]	protein_coding	32.647	29.705	33.173	39.6184	42.7268	45.2398	31.8416	42.5283	0.41751	7.02424e-09	3.08012e-12
ENSG00000167779	IGFBP6	insulin-like growth factor binding protein 6 [Source:HGNC Symbol;Acc:5475]	protein_coding	61.1479	60.9534	63.3644	46.1966	44.5704	45.3531	61.8219	45.3733	-0.446273	8.64434e-09	7.7263e-13
ENSG00000154734	ADAMTS1	ADAM metallopeptidase with thrombospondin type 1 motif, 1 [Source:HGNC Symbol;Acc:217]	protein_coding	63.4293	65.5949	61.4402	78.8294	78.879	76.0083	63.4882	77.9056	0.29524	6.33834e-09	2.92246e-09
ENSG00000134243	SORT1	sortilin 1 [Source:HGNC Symbol;Acc:11186]	protein_coding	20.3609	21.1881	19.6736	26.1908	26.1191	24.4365	20.4075	25.5821	0.326035	6.73982e-09	2.6743e-09
ENSG00000106366	SERPINE1	serpin peptidase inhibitor, clade E (nexin, plasminogen activator inhibitor type 1), member 1 [Source:HGNC Symbol;Acc:8583]	protein_coding	323.253	314.174	319.389	429.01	419.142	382.111	318.939	410.088	0.362653	9.65681e-09	2.97482e-11
ENSG00000198380	GFPT1	glutamine--fructose-6-phosphate transaminase 1 [Source:HGNC Symbol;Acc:4241]	protein_coding	21.7406	22.1476	22.1472	16.8789	16.8349	16.3495	22.0118	16.6878	-0.399487	1.06918e-08	3.03194e-11
ENSG00000150630	VEGFC	vascular endothelial growth factor C [Source:HGNC Symbol;Acc:12682]	protein_coding	20.0306	18.8489	20.4133	25.1537	25.7598	25.9803	19.7643	25.6313	0.375011	1.16678e-08	2.30122e-13
ENSG00000186376	ZNF75D	zinc finger protein 75D [Source:HGNC Symbol;Acc:13145]	protein_coding	2.81249	2.92423	2.65204	1.78393	1.79957	1.84874	2.79625	1.81075	-0.62691	1.1885e-08	5.10182e-14
ENSG00000214517	PPME1	protein phosphatase methylesterase 1 [Source:HGNC Symbol;Acc:30178]	protein_coding	5.91345	5.92168	6.38034	7.87859	7.65483	8.02413	6.07182	7.85252	0.371025	1.36055e-08	2.196e-12
ENSG00000011422	PLAUR	plasminogen activator, urokinase receptor [Source:HGNC Symbol;Acc:9053]	protein_coding	41.163	40.6528	42.7594	54.2202	50.8012	51.598	41.5251	52.2065	0.330245	1.35813e-08	4.86929e-11
ENSG00000158246	FAM46B	family with sequence similarity 46, member B [Source:HGNC Symbol;Acc:28273]	protein_coding	2.12212	2.07088	1.94933	3.52957	3.16816	3.8507	2.04744	3.51614	0.780171	1.46897e-08	6.81865e-14
ENSG00000120708	TGFBI	transforming growth factor, beta-induced, 68kDa [Source:HGNC Symbol;Acc:11771]	protein_coding	102.937	105.93	102.487	125.549	133.27	124.587	103.784	127.802	0.300323	1.42863e-08	5.38975e-10
ENSG00000163431	LMOD1	leiomodin 1 (smooth muscle) [Source:HGNC Symbol;Acc:6647]	protein_coding	16.5552	16.902	15.9724	22.5429	22.7342	20.3482	16.4765	21.8751	0.408877	1.52686e-08	1.23962e-11
ENSG00000137267	TUBB2A	tubulin, beta 2A class IIa [Source:HGNC Symbol;Acc:12412]	protein_coding	42.3349	41.5008	44.1354	53.5726	52.8576	59.1368	42.657	55.189	0.371597	1.56004e-08	2.9873e-12
ENSG00000182199	SHMT2	serine hydroxymethyltransferase 2 (mitochondrial) [Source:HGNC Symbol;Acc:10852]	protein_coding	39.6016	39.2438	39.8675	30.1685	29.7685	30.2867	39.571	30.0745	-0.3959	1.57101e-08	3.7274e-12
ENSG00000110880	CORO1C	coronin, actin binding protein, 1C [Source:HGNC Symbol;Acc:2254]	protein_coding	105.791	107.845	106.471	128.997	133.682	127.634	106.702	130.104	0.286082	1.62667e-08	2.11593e-10
ENSG00000077943	ITGA8	integrin, alpha 8 [Source:HGNC Symbol;Acc:6144]	protein_coding	4.78256	4.94447	4.50958	6.33177	6.75002	6.04906	4.74554	6.37695	0.426295	1.6735e-08	2.91119e-11
ENSG00000212724	KRTAP2-3	keratin associated protein 2-3 [Source:HGNC Symbol;Acc:18906]	protein_coding	10.4021	9.00139	9.07391	14.4574	14.8961	14.9928	9.49246	14.7821	0.638997	1.68871e-08	5.75019e-15
ENSG00000166510	CCDC68	coiled-coil domain containing 68 [Source:HGNC Symbol;Acc:24350]	protein_coding	11.7711	11.0229	12.0458	8.13439	8.48774	7.54525	11.6133	8.05579	-0.527674	1.73953e-08	1.10638e-12
ENSG00000128965	CHAC1	ChaC, cation transport regulator homolog 1 (E. coli) [Source:HGNC Symbol;Acc:28680]	protein_coding	47.4825	44.4343	48.8155	35.183	36.0751	33.277	46.9108	34.845	-0.428966	1.90446e-08	4.75077e-10
ENSG00000123416	TUBA1B	tubulin, alpha 1b [Source:HGNC Symbol;Acc:18809]	protein_coding	64.0814	60.0496	61.4795	73.4853	78.9154	76.4554	61.8702	76.2853	0.302162	2.05245e-08	1.99386e-10
ENSG00000128591	FLNC	filamin C, gamma [Source:HGNC Symbol;Acc:3756]	protein_coding	92.5974	94.7166	76.8222	121.374	117.597	115.132	88.0454	118.034	0.422887	8.98134e-11	2.15312e-08
ENSG00000182481	KPNA2	karyopherin alpha 2 (RAG cohort 1, importin alpha 1) [Source:HGNC Symbol;Acc:6395]	protein_coding	53.8775	54.1611	58.317	66.1539	70.9327	70.5063	55.4519	69.1977	0.319488	2.33224e-08	1.67989e-10
ENSG00000198824	CHAMP1	chromosome alignment maintaining phosphoprotein 1 [Source:HGNC Symbol;Acc:20311]	protein_coding	9.2354	9.47135	9.19856	12.4764	12.0739	11.7256	9.30177	12.092	0.378477	2.41296e-08	1.03517e-11
ENSG00000059804	SLC2A3	solute carrier family 2 (facilitated glucose transporter), member 3 [Source:HGNC Symbol;Acc:11007]	protein_coding	22.4478	21.7087	23.1862	17.356	16.854	15.9824	22.4476	16.7308	-0.424053	2.56672e-08	1.86105e-10
ENSG00000138449	SLC40A1	solute carrier family 40 (iron-regulated transporter), member 1 [Source:HGNC Symbol;Acc:10909]	protein_coding	3.34943	3.46581	3.3331	2.19782	2.0933	2.02342	3.38278	2.10485	-0.684494	2.59775e-08	9.81569e-15
ENSG00000173402	DAG1	dystroglycan 1 (dystrophin-associated glycoprotein 1) [Source:HGNC Symbol;Acc:2666]	protein_coding	19.9759	19.5502	18.4466	24.5833	23.4132	23.6137	19.3242	23.8701	0.304792	2.15836e-08	5.26391e-09
ENSG00000112118	MCM3	minichromosome maintenance complex component 3 [Source:HGNC Symbol;Acc:6945]	protein_coding	12.3237	12.3487	12.5947	15.39	16.0164	16.7244	12.4223	16.0436	0.369063	2.74972e-08	1.05188e-12
ENSG00000119729	RHOQ	ras homolog family member Q [Source:HGNC Symbol;Acc:17736]	protein_coding	22.6538	20.9903	22.9661	16.6168	16.9666	16.3757	22.2034	16.653	-0.414998	3.13558e-08	1.15218e-10
ENSG00000120742	SERP1	stress-associated endoplasmic reticulum protein 1 [Source:HGNC Symbol;Acc:10759]	protein_coding	30.4933	28.544	31.2487	22.2793	22.5899	24.096	30.0953	22.9884	-0.388633	2.94642e-08	2.07233e-09
ENSG00000213931	HBE1	hemoglobin, epsilon 1 [Source:HGNC Symbol;Acc:4830]	protein_coding	15.8506	17.1923	18.9693	24.5518	24.4674	26.2724	17.3374	25.0972	0.533637	3.22009e-08	2.00532e-13
ENSG00000134986	NREP	neuronal regeneration related protein homolog (rat) [Source:HGNC Symbol;Acc:16834]	protein_coding	6.23017	5.72031	6.37372	7.69519	7.93933	7.72745	6.10807	7.78732	0.350411	3.25379e-08	3.58239e-11
ENSG00000079931	MOXD1	monooxygenase, DBH-like 1 [Source:HGNC Symbol;Acc:21063]	protein_coding	26.6553	26.773	28.2327	20.266	20.9867	20.9531	27.2203	20.7353	-0.392598	3.9091e-08	9.17177e-11
ENSG00000147852	VLDLR	very low density lipoprotein receptor [Source:HGNC Symbol;Acc:12698]	protein_coding	4.94048	5.9459	5.2364	3.3345	3.60649	3.33288	5.37426	3.42462	-0.650122	4.48999e-08	6.27326e-11
ENSG00000136153	LMO7	LIM domain 7 [Source:HGNC Symbol;Acc:6646]	protein_coding	32.9357	33.5522	31.9097	39.8766	41.23	38.5651	32.7992	39.8906	0.282387	3.75624e-08	1.49938e-08
ENSG00000140937	CDH11	cadherin 11, type 2, OB-cadherin (osteoblast) [Source:HGNC Symbol;Acc:1750]	protein_coding	18.236	17.7563	17.2602	21.3487	22.2855	21.7697	17.7508	21.8013	0.296528	5.37033e-08	2.63797e-10
ENSG00000166851	PLK1	polo-like kinase 1 [Source:HGNC Symbol;Acc:9077]	protein_coding	6.47852	5.83133	6.50318	7.80694	8.42767	8.70905	6.27101	8.31455	0.406941	6.06773e-08	6.6214e-11
ENSG00000159840	ZYX	zyxin [Source:HGNC Symbol;Acc:13200]	protein_coding	137.486	126.929	130.034	164.507	152.446	160.721	131.483	159.225	0.276188	2.85847e-08	3.59492e-08
ENSG00000071242	RPS6KA2	ribosomal protein S6 kinase, 90kDa, polypeptide 2 [Source:HGNC Symbol;Acc:10431]	protein_coding	20.6116	20.9724	19.3162	15.8694	14.9884	15.4436	20.3001	15.4338	-0.395393	5.00364e-08	1.54615e-08
ENSG00000161638	ITGA5	integrin, alpha 5 (fibronectin receptor, alpha polypeptide) [Source:HGNC Symbol;Acc:6141]	protein_coding	69.4401	68.8295	67.2178	85.9336	82.1217	80.2643	68.4958	82.7732	0.273148	5.08336e-08	2.22965e-08
ENSG00000108344	PSMD3	proteasome (prosome, macropain) 26S subunit, non-ATPase, 3 [Source:HGNC Symbol;Acc:9560]	protein_coding	28.3967	29.7748	29.89	34.8763	35.5956	38.3062	29.3539	36.2594	0.304803	7.16586e-08	1.52951e-09
ENSG00000180914	OXTR	oxytocin receptor [Source:HGNC Symbol;Acc:8529]	protein_coding	33.517	31.6747	33.6098	44.997	42.3775	39.7072	32.9338	42.3606	0.36315	7.38878e-08	2.13015e-10
ENSG00000107290	SETX	senataxin [Source:HGNC Symbol;Acc:445]	protein_coding	13.2747	14.1817	12.1794	9.57211	9.06514	8.63096	13.212	9.0894	-0.539588	7.41926e-08	4.23668e-11
ENSG00000171608	PIK3CD	phosphatidylinositol-4,5-bisphosphate 3-kinase, catalytic subunit delta [Source:HGNC Symbol;Acc:8977]	protein_coding	4.79831	4.5319	4.2591	6.06911	5.52947	6.20514	4.52977	5.93457	0.389706	6.99358e-08	5.48015e-09
ENSG00000187134	AKR1C1	aldo-keto reductase family 1, member C1 (dihydrodiol dehydrogenase 1; 20-alpha (3-alpha)-hydroxysteroid dehydrogenase) [Source:HGNC Symbol;Acc:384]	protein_coding	3.12547	3.21966	3.32365	2.22184	2.20201	2.35216	3.22293	2.25867	-0.512896	8.72009e-08	1.06519e-12
ENSG00000137876	RSL24D1	ribosomal L24 domain containing 1 [Source:HGNC Symbol;Acc:18479]	protein_coding	24.5751	23.5427	27.8268	17.7867	18.1108	19.2686	25.3148	18.3887	-0.461163	8.51066e-08	3.8975e-09
ENSG00000135929	CYP27A1	cytochrome P450, family 27, subfamily A, polypeptide 1 [Source:HGNC Symbol;Acc:2605]	protein_coding	5.85346	5.91221	5.77841	3.84912	3.29098	3.91308	5.84803	3.6844	-0.666522	9.14202e-08	2.11665e-13
ENSG00000156466	GDF6	growth differentiation factor 6 [Source:HGNC Symbol;Acc:4221]	protein_coding	1.7445	1.59639	1.58667	2.4875	2.58471	3.0352	1.64252	2.70247	0.718367	9.1695e-08	9.45253e-13
ENSG00000109079	TNFAIP1	tumor necrosis factor, alpha-induced protein 1 (endothelial) [Source:HGNC Symbol;Acc:11894]	protein_coding	18.7304	18.6842	18.768	23.1694	24.4675	22.9823	18.7275	23.5397	0.329936	9.30386e-08	4.49254e-11
ENSG00000100650	SRSF5	serine/arginine-rich splicing factor 5 [Source:HGNC Symbol;Acc:10787]	protein_coding	45.5492	44.0499	48.1994	35.8307	35.4225	35.1352	45.9328	35.4628	-0.373221	9.60833e-08	3.34895e-09
ENSG00000168297	PXK	PX domain containing serine/threonine kinase [Source:HGNC Symbol;Acc:23326]	protein_coding	20.1192	20.2914	19.5798	15.2657	14.5084	15.1788	19.9968	14.9843	-0.416316	1.10582e-07	1.34901e-10
ENSG00000121073	SLC35B1	solute carrier family 35, member B1 [Source:HGNC Symbol;Acc:20798]	protein_coding	10.688	10.9657	11.9758	8.0413	8.3966	8.62806	11.2099	8.35532	-0.424001	1.06961e-07	4.74887e-09
ENSG00000118263	KLF7	Kruppel-like factor 7 (ubiquitous) [Source:HGNC Symbol;Acc:6350]	protein_coding	5.22641	4.73323	4.78194	3.67214	3.5411	3.42203	4.91386	3.54509	-0.471034	1.13493e-07	6.58339e-10
ENSG00000060718	COL11A1	collagen, type XI, alpha 1 [Source:HGNC Symbol;Acc:2186]	protein_coding	3.96361	4.23445	3.90901	5.29883	5.31784	5.11428	4.03569	5.24365	0.377758	1.24904e-07	2.06809e-10
ENSG00000072849	DERL2	derlin 2 [Source:HGNC Symbol;Acc:17943]	protein_coding	13.5713	12.851	13.7087	8.87197	9.01148	10.2579	13.377	9.38044	-0.51203	1.31565e-07	3.15854e-12
ENSG00000134508	CABLES1	Cdk5 and Abl enzyme substrate 1 [Source:HGNC Symbol;Acc:25097]	protein_coding	10.4701	9.96735	10.2253	7.65936	7.31826	7.46907	10.2209	7.48223	-0.449987	1.35114e-07	1.43527e-11
ENSG00000087586	AURKA	aurora kinase A [Source:HGNC Symbol;Acc:11393]	protein_coding	12.8718	13.7012	14.8072	17.4026	18.0594	19.6703	13.7934	18.3774	0.413958	1.38641e-07	1.16074e-10
ENSG00000140511	HAPLN3	hyaluronan and proteoglycan link protein 3 [Source:HGNC Symbol;Acc:21446]	protein_coding	2.04872	1.88615	1.93165	3.13493	2.84115	3.59293	1.95551	3.18967	0.705863	1.52912e-07	1.56333e-12
ENSG00000105855	ITGB8	integrin, beta 8 [Source:HGNC Symbol;Acc:6163]	protein_coding	0.701716	0.57356	0.555771	0.332699	0.333642	0.282786	0.610349	0.316376	-0.947997	1.65487e-07	3.92206e-11
ENSG00000072041	SLC6A15	solute carrier family 6 (neutral amino acid transporter), member 15 [Source:HGNC Symbol;Acc:13621]	protein_coding	0.722583	0.879804	0.897608	0.409136	0.502301	0.462334	0.833332	0.457924	-0.863783	1.68479e-07	2.16247e-10
ENSG00000208028	MIR616	microRNA 616 [Source:HGNC Symbol;Acc:32872]	miRNA	22.952	21.0139	24.3962	6.61168	5.17532	3.11461	22.7874	4.9672	-2.19773	1.69432e-07	1.95116e-22
ENSG00000136802	LRRC8A	leucine rich repeat containing 8 family, member A [Source:HGNC Symbol;Acc:19027]	protein_coding	18.3045	17.5496	16.479	22.1241	20.6156	21.9039	17.4444	21.5479	0.304783	1.26441e-07	5.40716e-08
ENSG00000110492	MDK	midkine (neurite growth-promoting factor 2) [Source:HGNC Symbol;Acc:6972]	protein_coding	88.3501	85.2612	95.2794	63.0369	62.9371	71.4476	89.6302	65.8072	-0.44574	1.95152e-07	1.15504e-09
ENSG00000172216	CEBPB	CCAAT/enhancer binding protein (C/EBP), beta [Source:HGNC Symbol;Acc:1834]	protein_coding	40.9464	30.9403	35.6722	24.5285	25.1716	25.4618	35.853	25.054	-0.517053	5.24619e-08	1.47105e-07
ENSG00000042062	FAM65C	family with sequence similarity 65, member C [Source:HGNC Symbol;Acc:16168]	protein_coding	25.1623	23.4993	23.4685	18.2644	15.46	17.1583	24.0434	16.9609	-0.503425	2.03749e-07	1.11249e-10
ENSG00000136492	BRIP1	BRCA1 interacting protein C-terminal helicase 1 [Source:HGNC Symbol;Acc:20473]	protein_coding	2.58593	2.36952	2.46502	3.69513	3.97282	3.36469	2.47349	3.67754	0.572196	2.04971e-07	4.40479e-12
ENSG00000131435	PDLIM4	PDZ and LIM domain 4 [Source:HGNC Symbol;Acc:16501]	protein_coding	13.9993	12.5402	13.4452	16.6568	16.3299	18.0692	13.3283	17.0186	0.352627	2.04433e-07	1.83389e-09
ENSG00000122884	P4HA1	prolyl 4-hydroxylase, alpha polypeptide I [Source:HGNC Symbol;Acc:8546]	protein_coding	50.213	51.0991	55.652	61.8437	64.0594	66.8269	52.3214	64.2433	0.296147	2.20463e-07	9.52202e-09
ENSG00000106479	ZNF862	zinc finger protein 862 [Source:HGNC Symbol;Acc:34519]	protein_coding	2.93903	2.72635	2.58882	1.98292	1.77988	1.85056	2.7514	1.87112	-0.556261	2.38981e-07	4.66319e-10
ENSG00000166508	MCM7	minichromosome maintenance complex component 7 [Source:HGNC Symbol;Acc:6950]	protein_coding	20.9809	20.1476	20.6711	24.6541	25.6197	26.1693	20.5999	25.481	0.306789	2.54373e-07	4.05336e-11
ENSG00000105722	ERF	Ets2 repressor factor [Source:HGNC Symbol;Acc:3444]	protein_coding	12.3862	11.473	12.3883	16.7409	14.8199	17.7584	12.0825	16.4397	0.444262	2.61402e-07	8.22108e-11
ENSG00000154511	FAM69A	family with sequence similarity 69, member A [Source:HGNC Symbol;Acc:32213]	protein_coding	23.0854	22.9035	22.998	28.0655	28.6805	29.7821	22.9956	28.8427	0.326846	2.86737e-07	2.16758e-11
ENSG00000168528	SERINC2	serine incorporator 2 [Source:HGNC Symbol;Acc:23231]	protein_coding	70.3773	64.4536	68.4981	87.6367	78.4622	86.7105	67.7764	84.2698	0.314234	2.99872e-07	1.28891e-08
ENSG00000178773	CPNE7	copine VII [Source:HGNC Symbol;Acc:2320]	protein_coding	15.9442	13.2296	13.3424	9.24452	8.15265	7.74036	14.1721	8.37918	-0.758168	3.23778e-07	1.93813e-14
ENSG00000161010	C5orf45	chromosome 5 open reading frame 45 [Source:HGNC Symbol;Acc:30817]	protein_coding	4.54602	3.90756	4.50956	3.1641	2.97307	3.10115	4.32105	3.07944	-0.488713	3.29111e-07	2.4978e-09
ENSG00000163347	CLDN1	claudin 1 [Source:HGNC Symbol;Acc:2032]	protein_coding	29.6429	28.9041	29.8134	37.6826	38.5865	35.0232	29.4535	37.0975	0.332883	3.33902e-07	2.776e-10
ENSG00000130402	ACTN4	actinin, alpha 4 [Source:HGNC Symbol;Acc:166]	protein_coding	106.858	104.683	97.3345	127.661	122.425	123.244	102.959	124.443	0.273425	1.61132e-07	1.82361e-07
ENSG00000136546	SCN7A	sodium channel, voltage-gated, type VII, alpha subunit [Source:HGNC Symbol;Acc:10594]	protein_coding	1.50638	1.57587	1.38016	0.914199	1.01112	0.871699	1.48747	0.932339	-0.673936	3.60039e-07	3.40487e-10
ENSG00000128917	DLL4	delta-like 4 (Drosophila) [Source:HGNC Symbol;Acc:2910]	protein_coding	6.36097	6.23996	6.29489	8.88452	8.02997	7.98936	6.29861	8.30128	0.3983	3.65938e-07	3.47212e-10
ENSG00000143867	OSR1	odd-skipped related 1 (Drosophila) [Source:HGNC Symbol;Acc:8111]	protein_coding	4.32805	4.02557	4.15161	5.33851	5.36997	5.9707	4.16841	5.55973	0.415517	3.77967e-07	7.60483e-11
ENSG00000125459	MSTO1	misato homolog 1 (Drosophila) [Source:HGNC Symbol;Acc:29678]	protein_coding	5.50754	5.36913	5.44072	3.88748	3.58048	4.04368	5.43913	3.83721	-0.503318	4.12863e-07	3.57017e-11
ENSG00000116679	IVNS1ABP	influenza virus NS1A binding protein [Source:HGNC Symbol;Acc:16951]	protein_coding	7.8018	8.24875	7.98822	9.81573	10.4818	9.69891	8.01292	9.9988	0.319426	4.15235e-07	5.27092e-09
ENSG00000100242	SUN2	Sad1 and UNC84 domain containing 2 [Source:HGNC Symbol;Acc:14210]	protein_coding	10.105	9.78184	9.7144	12.5277	11.9894	12.1837	9.86709	12.2336	0.31015	4.25924e-07	4.94673e-10
ENSG00000163661	PTX3	pentraxin 3, long [Source:HGNC Symbol;Acc:9692]	protein_coding	209.584	211.403	227.849	151.557	164.489	173.017	216.279	163.021	-0.407834	4.26318e-07	6.78859e-09
ENSG00000175416	CLTB	clathrin, light chain B [Source:HGNC Symbol;Acc:2091]	protein_coding	38.8241	37.0316	39.2593	47.4539	47.2708	47.2795	38.3717	47.3347	0.302858	4.40426e-07	8.13286e-11
ENSG00000163026	C2orf44	chromosome 2 open reading frame 44 [Source:HGNC Symbol;Acc:26157]	protein_coding	2.26528	2.31907	2.23272	3.31269	3.42181	3.36265	2.27236	3.36572	0.566724	4.97899e-07	7.5675e-14
ENSG00000163874	ZC3H12A	zinc finger CCCH-type containing 12A [Source:HGNC Symbol;Acc:26259]	protein_coding	5.50149	5.34634	5.80888	3.85237	3.69968	3.5589	5.55224	3.70365	-0.584122	4.97899e-07	4.60865e-12
ENSG00000025434	NR1H3	nuclear receptor subfamily 1, group H, member 3 [Source:HGNC Symbol;Acc:7966]	protein_coding	4.77878	4.73095	5.02158	3.26079	3.28561	3.4063	4.84377	3.31757	-0.546005	5.02762e-07	8.92454e-13
ENSG00000149256	ODZ4	odz, odd Oz/ten-m homolog 4 (Drosophila) [Source:HGNC Symbol;Acc:29945]	protein_coding	1.76456	1.71857	1.27202	1.00464	1.03496	0.967086	1.58505	1.00223	-0.661316	4.76441e-08	4.60275e-07
ENSG00000210082	J01415.4		Mt_rRNA	2054.22	2153.59	2226.04	1739.9	1646.52	1680.44	2144.62	1688.95	-0.344591	2.55302e-07	2.80768e-07
ENSG00000006016	CRLF1	cytokine receptor-like factor 1 [Source:HGNC Symbol;Acc:2364]	protein_coding	0.582442	0.655744	0.518806	1.33176	1.56316	1.53939	0.585664	1.4781	1.3356	5.75883e-07	3.79242e-14
ENSG00000083444	PLOD1	procollagen-lysine, 2-oxoglutarate 5-dioxygenase 1 [Source:HGNC Symbol;Acc:9081]	protein_coding	89.3725	89.877	86.9273	110.897	105.63	103.045	88.7256	106.524	0.263759	4.63659e-07	1.34662e-07
ENSG00000149925	ALDOA	aldolase A, fructose-bisphosphate [Source:HGNC Symbol;Acc:414]	protein_coding	140.467	133.788	141.004	163.897	164.339	166.17	138.42	164.802	0.251685	5.99499e-07	1.98485e-09
ENSG00000072110	ACTN1	actinin, alpha 1 [Source:HGNC Symbol;Acc:163]	protein_coding	109.141	110.909	101.47	133.838	127.2	127.042	107.173	129.36	0.271445	2.43808e-07	4.7579e-07
ENSG00000143624	INTS3	integrator complex subunit 3 [Source:HGNC Symbol;Acc:26153]	protein_coding	14.0882	14.0337	13.7616	10.758	10.8992	10.7589	13.9612	10.8054	-0.36967	7.67117e-07	1.42927e-09
ENSG00000140416	TPM1	tropomyosin 1 (alpha) [Source:HGNC Symbol;Acc:12010]	protein_coding	62.132	64.0825	64.5769	75.7888	76.6565	74.9084	63.5971	75.7846	0.252942	7.82074e-07	1.14486e-08
ENSG00000168264	IRF2BP2	interferon regulatory factor 2 binding protein 2 [Source:HGNC Symbol;Acc:21729]	protein_coding	9.80942	9.97424	9.83942	7.20845	7.03724	7.68026	9.87436	7.30865	-0.434082	8.36027e-07	4.72351e-10
ENSG00000110436	SLC1A2	solute carrier family 1 (glial high affinity glutamate transporter), member 2 [Source:HGNC Symbol;Acc:10940]	protein_coding	0.555373	0.498893	0.486202	0.276453	0.269792	0.288207	0.513489	0.278151	-0.884467	8.37758e-07	1.17713e-12
ENSG00000052802	MSMO1	methylsterol monooxygenase 1 [Source:HGNC Symbol;Acc:10545]	protein_coding	26.4711	25.7413	27.508	20.6596	20.1358	19.5922	26.5735	20.1292	-0.400697	8.46839e-07	2.71796e-09
ENSG00000117399	CDC20	cell division cycle 20 homolog (S. cerevisiae) [Source:HGNC Symbol;Acc:1723]	protein_coding	17.9124	17.7391	17.5433	21.67	22.4194	23.8342	17.7316	22.6412	0.35263	8.97539e-07	1.43236e-10
ENSG00000131620	ANO1	anoctamin 1, calcium activated chloride channel [Source:HGNC Symbol;Acc:21625]	protein_coding	4.16474	4.26495	4.06292	5.57583	5.27921	5.40382	4.1642	5.41962	0.380152	8.9845e-07	2.06809e-10
ENSG00000175029	CTBP2	C-terminal binding protein 2 [Source:HGNC Symbol;Acc:2495]	protein_coding	12.963	12.3535	12.2714	9.51486	9.37154	9.90597	12.5293	9.59746	-0.384584	8.97539e-07	2.07155e-09
ENSG00000171793	CTPS1	CTP synthase 1 [Source:HGNC Symbol;Acc:2519]	protein_coding	9.73675	10.0149	10.2195	12.5014	12.4092	12.3066	9.99039	12.4057	0.312394	9.40014e-07	4.40924e-10
ENSG00000139926	FRMD6	FERM domain containing 6 [Source:HGNC Symbol;Acc:19839]	protein_coding	27.0862	27.5302	27.1643	33.2865	33.3569	31.3651	27.2602	32.6695	0.261146	8.46839e-07	9.59945e-08
ENSG00000148677	ANKRD1	ankyrin repeat domain 1 (cardiac muscle) [Source:HGNC Symbol;Acc:15819]	protein_coding	0.626776	0.806078	0.664318	1.60989	1.76157	1.3462	0.699057	1.57255	1.16963	1.00349e-06	6.34226e-12
ENSG00000116962	NID1	nidogen 1 [Source:HGNC Symbol;Acc:7821]	protein_coding	32.9222	34.579	30.3761	40.7589	41.8861	39.1136	32.6257	40.5862	0.314979	8.46839e-07	2.14777e-07
ENSG00000183023	SLC8A1	solute carrier family 8 (sodium/calcium exchanger), member 1 [Source:HGNC Symbol;Acc:11068]	protein_coding	7.25673	7.90323	7.19354	9.49023	9.34625	9.32818	7.45117	9.38822	0.333385	1.08054e-06	7.27818e-09
ENSG00000135914	HTR2B	5-hydroxytryptamine (serotonin) receptor 2B, G protein-coupled [Source:HGNC Symbol;Acc:5294]	protein_coding	0.934604	0.841781	0.741437	0.239489	0.298015	0.256799	0.839274	0.264767	-1.66442	1.11236e-06	3.82107e-13
ENSG00000185262	FAM100B	family with sequence similarity 100, member B [Source:HGNC Symbol;Acc:28438]	protein_coding	17.2644	15.4589	18.2687	11.1909	9.13249	11.709	16.9973	10.6775	-0.670738	1.13568e-06	1.77245e-10
ENSG00000140564	FURIN	furin (paired basic amino acid cleaving enzyme) [Source:HGNC Symbol;Acc:8568]	protein_coding	26.2163	25.6751	24.5017	31.5183	29.5825	31.0833	25.4644	30.728	0.271075	1.13564e-06	1.33795e-07
ENSG00000143179	UCK2	uridine-cytidine kinase 2 [Source:HGNC Symbol;Acc:12562]	protein_coding	10.3425	9.89085	10.0284	12.6182	12.0977	12.4224	10.0872	12.3795	0.295417	1.27212e-06	1.47671e-09
ENSG00000119655	NPC2	Niemann-Pick disease, type C2 [Source:HGNC Symbol;Acc:14537]	protein_coding	41.7085	43.2856	47.144	33.4367	33.327	34.4489	44.046	33.7376	-0.384656	1.27212e-06	4.16973e-08
ENSG00000035403	VCL	vinculin [Source:HGNC Symbol;Acc:12665]	protein_coding	138.32	140.264	129.4	161.678	166.961	159.047	135.995	162.562	0.25744	8.78336e-07	5.54177e-07
ENSG00000063046	EIF4B	eukaryotic translation initiation factor 4B [Source:HGNC Symbol;Acc:3285]	protein_coding	49.2857	48.3879	52.2984	40.4002	39.5695	37.8373	49.9906	39.269	-0.348268	1.10129e-06	3.88792e-07
ENSG00000221852	KRTAP1-5	keratin associated protein 1-5 [Source:HGNC Symbol;Acc:16777]	protein_coding	15.3755	15.0342	14.9179	21.8834	23.8847	19.2513	15.1092	21.6732	0.520483	1.53073e-06	3.02451e-10
ENSG00000197646	PDCD1LG2	programmed cell death 1 ligand 2 [Source:HGNC Symbol;Acc:18731]	protein_coding	14.4424	15.0394	15.1876	20.2176	21.4763	18.2306	14.8898	19.9748	0.42386	1.56635e-06	4.63132e-10
ENSG00000164284	GRPEL2	GrpE-like 2, mitochondrial (E. coli) [Source:HGNC Symbol;Acc:21060]	protein_coding	4.08807	4.05783	4.58162	2.94007	2.94733	2.79687	4.2425	2.89476	-0.551474	1.5799e-06	4.10109e-10
ENSG00000255823	MTRNR2L8	MT-RNR2-like 8 [Source:HGNC Symbol;Acc:37165]	protein_coding	157.348	164.4	171.192	131.185	123.339	131.663	164.314	128.729	-0.352111	1.33142e-06	3.53986e-07
ENSG00000126950	TMEM35	transmembrane protein 35 [Source:HGNC Symbol;Acc:25864]	protein_coding	16.2426	17.4076	18.4655	12.3839	13.6138	12.6697	17.3719	12.8891	-0.430602	1.59092e-06	1.45902e-07
ENSG00000144959	NCEH1	neutral cholesterol ester hydrolase 1 [Source:HGNC Symbol;Acc:29260]	protein_coding	11.2587	10.9059	11.1319	14.4619	15.4412	13.407	11.0989	14.4367	0.379329	1.82212e-06	5.09391e-10
ENSG00000164692	COL1A2	collagen, type I, alpha 2 [Source:HGNC Symbol;Acc:2198]	protein_coding	687.029	688.296	670.138	837.284	819.725	778.687	681.821	811.899	0.251907	1.60837e-06	2.823e-07
ENSG00000041353	RAB27B	RAB27B, member RAS oncogene family [Source:HGNC Symbol;Acc:9767]	protein_coding	0.958279	0.721341	0.851051	0.428357	0.477896	0.462787	0.843557	0.456347	-0.886356	1.89304e-06	5.3424e-10
ENSG00000150551	LYPD1	LY6/PLAUR domain containing 1 [Source:HGNC Symbol;Acc:28431]	protein_coding	3.80234	4.016	3.96	5.22788	6.07742	7.26988	3.92612	6.19173	0.657239	1.92522e-06	3.45485e-09
ENSG00000150593	PDCD4	programmed cell death 4 (neoplastic transformation inhibitor) [Source:HGNC Symbol;Acc:8763]	protein_coding	11.3474	11.3019	12.2659	8.58091	8.60968	9.08442	11.6384	8.75834	-0.410161	1.94598e-06	6.14995e-09
ENSG00000167874	TMEM88	transmembrane protein 88 [Source:HGNC Symbol;Acc:32371]	protein_coding	2.26136	1.69388	2.11073	0.640574	0.511729	0.69293	2.02199	0.615078	-1.71694	1.98766e-06	1.21107e-12
ENSG00000168944	CEP120	centrosomal protein 120kDa [Source:HGNC Symbol;Acc:26690]	protein_coding	4.92537	4.61384	4.69798	3.36776	3.53622	3.31469	4.74573	3.40623	-0.478456	1.98817e-06	2.15528e-10
ENSG00000092621	PHGDH	phosphoglycerate dehydrogenase [Source:HGNC Symbol;Acc:8923]	protein_coding	20.7156	20.3201	21.8271	15.4457	15.225	17.08	20.9543	15.9169	-0.396686	1.98766e-06	1.11246e-08
ENSG00000159200	RCAN1	regulator of calcineurin 1 [Source:HGNC Symbol;Acc:3040]	protein_coding	21.7805	20.9166	22.2548	16.3475	16.7252	17.4867	21.6506	16.8532	-0.361392	1.99827e-06	1.14486e-08
ENSG00000171469	ZNF561	zinc finger protein 561 [Source:HGNC Symbol;Acc:28684]	protein_coding	6.67011	6.41028	6.55658	4.81582	4.77842	4.96083	6.54566	4.85169	-0.432052	2.25623e-06	1.77245e-10
ENSG00000136040	PLXNC1	plexin C1 [Source:HGNC Symbol;Acc:9106]	protein_coding	1.2803	1.20711	1.10514	0.782581	0.739049	0.763926	1.19752	0.761852	-0.652462	2.25742e-06	2.34211e-10
ENSG00000163453	IGFBP7	insulin-like growth factor binding protein 7 [Source:HGNC Symbol;Acc:5476]	protein_coding	33.5572	28.5159	28.0563	43.3597	43.9005	56.6253	30.0431	47.9618	0.674852	2.31402e-06	1.28544e-12
ENSG00000013441	CLK1	CDC-like kinase 1 [Source:HGNC Symbol;Acc:2068]	protein_coding	9.31384	8.82809	9.69132	6.70665	7.03434	7.15052	9.27775	6.96384	-0.413893	2.41386e-06	4.16907e-09
ENSG00000155304	HSPA13	heat shock protein 70kDa family, member 13 [Source:HGNC Symbol;Acc:11375]	protein_coding	18.1699	18.4756	18.2438	13.6836	14.4832	14.0011	18.2964	14.056	-0.380379	2.41386e-06	8.07501e-09
ENSG00000104738	MCM4	minichromosome maintenance complex component 4 [Source:HGNC Symbol;Acc:6947]	protein_coding	8.94862	8.35934	9.02487	10.2349	11.1042	11.2493	8.77761	10.8628	0.307498	2.42658e-06	1.15604e-08
ENSG00000132640	BTBD3	BTB (POZ) domain containing 3 [Source:HGNC Symbol;Acc:15854]	protein_coding	7.81334	7.15289	7.97462	9.30104	9.59643	9.67545	7.64695	9.52431	0.31673	2.4758e-06	4.21661e-09
ENSG00000120686	UFM1	ubiquitin-fold modifier 1 [Source:HGNC Symbol;Acc:20597]	protein_coding	31.5262	31.1022	33.3656	25.2697	24.7567	24.5772	31.998	24.8679	-0.3637	2.49861e-06	1.89323e-08
ENSG00000154553	PDLIM3	PDZ and LIM domain 3 [Source:HGNC Symbol;Acc:20767]	protein_coding	2.62267	2.16003	2.33635	1.71113	1.49034	1.57032	2.37302	1.5906	-0.577153	2.75271e-06	3.26226e-08
ENSG00000171314	PGAM1	phosphoglycerate mutase 1 (brain) [Source:HGNC Symbol;Acc:8888]	protein_coding	86.3413	84.4324	90.7268	100.074	104.934	107.444	87.1668	104.15	0.256817	2.81672e-06	3.48644e-08
ENSG00000259706	HSP90B2P	heat shock protein 90kDa beta (Grp94), member 2, pseudogene [Source:HGNC Symbol;Acc:12099]	pseudogene	14.2615	14.5352	14.9998	10.7867	10.5286	10.7488	14.5988	10.688	-0.449857	2.95131e-06	2.43509e-10
ENSG00000107562	CXCL12	chemokine (C-X-C motif) ligand 12 [Source:HGNC Symbol;Acc:10672]	protein_coding	1.32105	1.26407	1.32339	0.745812	0.795586	0.80932	1.30283	0.783573	-0.733515	3.01265e-06	6.60806e-12
ENSG00000049130	KITLG	KIT ligand [Source:HGNC Symbol;Acc:6343]	protein_coding	15.6111	15.226	15.7192	11.7967	12.1151	10.9084	15.5188	11.6067	-0.419053	3.13843e-06	1.53627e-09
ENSG00000105976	MET	met proto-oncogene (hepatocyte growth factor receptor) [Source:HGNC Symbol;Acc:7029]	protein_coding	5.39872	5.3371	5.07731	7.28842	7.53539	6.28401	5.27105	7.03594	0.416653	3.20723e-06	1.4405e-08
ENSG00000072657	TRHDE	thyrotropin-releasing hormone degrading enzyme [Source:HGNC Symbol;Acc:30748]	protein_coding	23.9828	24.1084	23.7868	28.2915	29.8233	27.8711	23.9593	28.662	0.258549	3.14424e-06	9.12996e-08
ENSG00000006459	JHDM1D	jumonji C domain containing histone demethylase 1 homolog D (S. cerevisiae) [Source:HGNC Symbol;Acc:22224]	protein_coding	1.1872	1.19982	1.09673	0.702037	0.75712	0.760172	1.16125	0.739776	-0.650519	3.23759e-06	1.2387e-10
ENSG00000136960	ENPP2	ectonucleotide pyrophosphatase/phosphodiesterase 2 [Source:HGNC Symbol;Acc:3357]	protein_coding	2.95154	3.01866	2.92538	2.13524	2.06481	1.96094	2.96519	2.05366	-0.529927	3.30613e-06	2.11068e-10
ENSG00000165271	NOL6	nucleolar protein family 6 (RNA-associated) [Source:HGNC Symbol;Acc:19910]	protein_coding	11.9992	11.2747	11.3473	14.4036	13.4933	14.1956	11.5404	14.0308	0.281909	3.4894e-06	5.40456e-08
ENSG00000034152	MAP2K3	mitogen-activated protein kinase kinase 3 [Source:HGNC Symbol;Acc:6843]	protein_coding	29.1987	27.5515	29.3857	36.9435	33.0366	35.6079	28.712	35.196	0.293761	3.74334e-06	6.85894e-08
ENSG00000166147	FBN1	fibrillin 1 [Source:HGNC Symbol;Acc:3603]	protein_coding	36.4005	40.0939	31.2214	48.1316	49.4498	45.41	35.9053	47.6638	0.408699	3.05908e-06	9.25636e-07
ENSG00000167325	RRM1	ribonucleotide reductase M1 [Source:HGNC Symbol;Acc:10451]	protein_coding	20.6024	20.9445	21.3141	24.1164	26.202	26.1911	20.9537	25.5032	0.283473	3.97901e-06	1.40368e-08
ENSG00000125753	VASP	vasodilator-stimulated phosphoprotein [Source:HGNC Symbol;Acc:12652]	protein_coding	42.7682	39.8019	43.1966	50.5168	49.3124	51.8187	41.9222	50.5493	0.269975	4.0356e-06	2.25458e-08
ENSG00000136527	TRA2B	transformer 2 beta homolog (Drosophila) [Source:HGNC Symbol;Acc:10781]	protein_coding	15.6065	14.8748	15.3635	11.5122	12.0595	12.7303	15.2816	12.1007	-0.336711	3.97901e-06	3.62687e-07
ENSG00000125845	BMP2	bone morphogenetic protein 2 [Source:HGNC Symbol;Acc:1069]	protein_coding	16.497	14.8778	15.1701	12.1855	11.4156	11.4719	15.515	11.691	-0.408261	4.4086e-06	1.31562e-07
ENSG00000116133	DHCR24	24-dehydrocholesterol reductase [Source:HGNC Symbol;Acc:2859]	protein_coding	44.5496	44.6319	42.5014	51.1636	51.6857	53.8385	43.8943	52.2292	0.250825	4.5135e-06	1.20819e-07
ENSG00000145860	RNF145	ring finger protein 145 [Source:HGNC Symbol;Acc:20853]	protein_coding	22.5175	22.5524	23.4513	26.3366	27.5423	28.9338	22.8404	27.6042	0.273301	4.62074e-06	2.22571e-08
ENSG00000184564	SLITRK6	SLIT and NTRK-like family, member 6 [Source:HGNC Symbol;Acc:23503]	protein_coding	1.01646	1.24514	1.20433	0.536608	0.684636	0.642424	1.15531	0.621223	-0.895098	4.95003e-06	1.57966e-09
ENSG00000171451	DSEL	dermatan sulfate epimerase-like [Source:HGNC Symbol;Acc:18144]	protein_coding	16.675	17.2022	16.0866	19.6832	20.1759	19.7222	16.6546	19.8604	0.253976	4.76682e-06	2.56938e-07
ENSG00000122952	ZWINT	ZW10 interactor [Source:HGNC Symbol;Acc:13195]	protein_coding	11.5156	12.2985	13.5633	15.2856	16.7241	17.2091	12.4591	16.4063	0.397043	5.13717e-06	1.26844e-08
ENSG00000117592	PRDX6	peroxiredoxin 6 [Source:HGNC Symbol;Acc:16753]	protein_coding	191.165	188.705	202.063	225.682	233.8	226.753	193.978	228.745	0.237853	5.08657e-06	1.38833e-07
ENSG00000042493	CAPG	capping protein (actin filament), gelsolin-like [Source:HGNC Symbol;Acc:1474]	protein_coding	23.3865	23.2689	25.2229	18.6075	17.5153	19.2046	23.9594	18.4425	-0.377562	5.16703e-06	2.10404e-07
ENSG00000070614	NDST1	N-deacetylase/N-sulfotransferase (heparan glucosaminyl) 1 [Source:HGNC Symbol;Acc:7680]	protein_coding	24.8992	24.6678	22.6112	29.4115	28.8258	28.2867	24.0594	28.8413	0.261536	4.06324e-06	1.39259e-06
ENSG00000142102	ATHL1	ATH1, acid trehalase-like 1 (yeast) [Source:HGNC Symbol;Acc:26210]	protein_coding	8.58611	7.49202	8.52019	6.34411	5.75281	6.17707	8.19944	6.09133	-0.428768	5.1389e-06	3.89453e-07
ENSG00000225614	ZNF469	zinc finger protein 469 [Source:HGNC Symbol;Acc:23216]	protein_coding	7.48505	6.71443	5.88175	10.4274	8.90389	10.0935	6.69374	9.80827	0.551186	5.5659e-06	4.56673e-11
ENSG00000117479	SLC19A2	solute carrier family 19 (thiamine transporter), member 2 [Source:HGNC Symbol;Acc:10938]	protein_coding	4.24527	3.91094	4.51241	2.85723	3.00088	2.71585	4.22287	2.85799	-0.563224	5.6665e-06	3.58317e-09
ENSG00000163520	FBLN2	fibulin 2 [Source:HGNC Symbol;Acc:3601]	protein_coding	5.44935	5.25664	5.2688	4.05813	3.61175	3.76575	5.32493	3.81188	-0.482262	6.22821e-06	3.84609e-09
ENSG00000164949	GEM	GTP binding protein overexpressed in skeletal muscle [Source:HGNC Symbol;Acc:4234]	protein_coding	12.6955	11.3011	12.0811	8.64872	8.40468	7.21896	12.0259	8.09078	-0.571793	6.59452e-06	9.59021e-10
ENSG00000152078	TMEM56	transmembrane protein 56 [Source:HGNC Symbol;Acc:26477]	protein_coding	1.24607	1.05362	1.25118	0.790969	0.655596	0.660472	1.18362	0.702346	-0.752957	6.71487e-06	4.3105e-09
ENSG00000087086	FTL	ferritin, light polypeptide [Source:HGNC Symbol;Acc:3999]	protein_coding	4182.41	4025.05	4375.54	3422.94	3277.75	3416.99	4194.33	3372.56	-0.314597	5.79293e-06	1.15198e-06
ENSG00000072501	SMC1A	structural maintenance of chromosomes 1A [Source:HGNC Symbol;Acc:11111]	protein_coding	7.48455	7.90587	7.68736	9.09017	9.57313	9.2682	7.69259	9.3105	0.275388	6.997e-06	3.9388e-08
ENSG00000173598	NUDT4	nudix (nucleoside diphosphate linked moiety X)-type motif 4 [Source:HGNC Symbol;Acc:8051]	protein_coding	16.8725	16.2192	16.9482	12.8762	12.9486	13.038	16.68	12.9543	-0.364691	7.07083e-06	5.88128e-09
ENSG00000213190	MLLT11	myeloid/lymphoid or mixed-lineage leukemia (trithorax homolog, Drosophila); translocated to, 11 [Source:HGNC Symbol;Acc:16997]	protein_coding	9.84139	9.77937	9.87951	12.0969	12.3556	12.242	9.83343	12.2315	0.314836	7.14187e-06	7.5384e-10
ENSG00000068878	PSME4	proteasome (prosome, macropain) activator subunit 4 [Source:HGNC Symbol;Acc:20635]	protein_coding	12.8069	12.9234	12.2084	15.0881	15.6097	14.5773	12.6462	15.0917	0.255048	6.22821e-06	9.55844e-07
ENSG00000134294	SLC38A2	solute carrier family 38, member 2 [Source:HGNC Symbol;Acc:13448]	protein_coding	243.099	242.424	242.156	193.83	198.849	193.946	242.56	195.542	-0.310865	7.07083e-06	2.15825e-07
ENSG00000132475	H3F3B	H3 histone, family 3B (H3.3B) [Source:HGNC Symbol;Acc:4765]	protein_coding	167.32	161.357	176.297	137.73	126.941	136.686	168.324	133.786	-0.331322	4.67991e-06	2.76686e-06
ENSG00000115461	IGFBP5	insulin-like growth factor binding protein 5 [Source:HGNC Symbol;Acc:5474]	protein_coding	1200.1	1269.61	1119.94	1589.04	1512.89	1442.83	1196.55	1514.92	0.340362	7.67605e-06	5.84004e-08
ENSG00000131446	MGAT1	mannosyl (alpha-1,3-)-glycoprotein beta-1,2-N-acetylglucosaminyltransferase [Source:HGNC Symbol;Acc:7044]	protein_coding	35.9165	35.9705	36.1712	42.1872	41.0164	44.6705	36.0194	42.6247	0.242915	7.60194e-06	2.11506e-07
ENSG00000186815	TPCN1	two pore segment channel 1 [Source:HGNC Symbol;Acc:18182]	protein_coding	8.42858	8.2484	7.74565	6.4449	6.33642	5.95374	8.14088	6.24502	-0.382478	7.08155e-06	9.66116e-07
ENSG00000102265	TIMP1	TIMP metallopeptidase inhibitor 1 [Source:HGNC Symbol;Acc:11820]	protein_coding	341.965	320.844	361.077	417.647	409.083	388.779	341.295	405.17	0.247505	4.69351e-06	3.54448e-06
ENSG00000166986	MARS	methionyl-tRNA synthetase [Source:HGNC Symbol;Acc:6898]	protein_coding	29.3204	29.5286	29.685	22.9224	23.2463	24.3623	29.5113	23.5103	-0.327974	8.15572e-06	1.28122e-07
ENSG00000131747	TOP2A	topoisomerase (DNA) II alpha 170kDa [Source:HGNC Symbol;Acc:11989]	protein_coding	23.9013	25.8125	24.4043	28.4405	30.8908	29.495	24.706	29.6088	0.261162	7.39143e-06	1.15198e-06
ENSG00000186185	KIF18B	kinesin family member 18B [Source:HGNC Symbol;Acc:27102]	protein_coding	3.2301	3.02962	3.11254	4.63475	4.38748	4.12024	3.12409	4.38083	0.487768	8.85672e-06	2.54993e-09
ENSG00000117500	TMED5	transmembrane emp24 protein transport domain containing 5 [Source:HGNC Symbol;Acc:24251]	protein_coding	12.7314	11.6058	12.1474	9.4121	9.66341	9.56896	12.1616	9.54815	-0.349034	8.77745e-06	1.5767e-07
ENSG00000105971	CAV2	caveolin 2 [Source:HGNC Symbol;Acc:1528]	protein_coding	19.1393	17.3067	18.9941	22.1426	22.5058	21.3838	18.48	22.0107	0.25224	8.07065e-06	1.05132e-06
ENSG00000143545	RAB13	RAB13, member RAS oncogene family [Source:HGNC Symbol;Acc:9762]	protein_coding	83.2343	90.268	91.6624	68.2565	69.9029	71.7558	88.3882	69.9717	-0.337082	7.74348e-06	1.72764e-06
ENSG00000149596	JPH2	junctophilin 2 [Source:HGNC Symbol;Acc:14202]	protein_coding	2.1139	2.21199	1.95162	3.07729	2.60919	3.00394	2.0925	2.89681	0.469233	9.63892e-06	8.12759e-08
ENSG00000149090	PAMR1	peptidase domain containing associated with muscle regeneration 1 [Source:HGNC Symbol;Acc:24554]	protein_coding	87.8958	91.1786	89.6806	72.7889	70.7196	71.3726	89.585	71.627	-0.322753	9.51911e-06	4.60275e-07
ENSG00000138764	CCNG2	cyclin G2 [Source:HGNC Symbol;Acc:1593]	protein_coding	5.27882	4.92684	5.09145	3.59987	3.88978	3.99976	5.09904	3.8298	-0.412955	1.05581e-05	4.64778e-08
ENSG00000188643	S100A16	S100 calcium binding protein A16 [Source:HGNC Symbol;Acc:20441]	protein_coding	62.5288	61.8903	69.0328	76.1267	76.5507	79.896	64.484	77.5245	0.265712	1.05693e-05	2.63113e-07
ENSG00000172071	EIF2AK3	eukaryotic translation initiation factor 2-alpha kinase 3 [Source:HGNC Symbol;Acc:3255]	protein_coding	4.20241	4.03379	4.24196	3.09142	2.90491	2.87591	4.15939	2.95742	-0.492034	1.10714e-05	8.14086e-10
ENSG00000257298	RP3-405J10.3		sense_intronic	0.782806	0.607999	0.477312	0.201921	0.301793	0.233102	0.622706	0.245605	-1.34221	1.10714e-05	7.27818e-09
ENSG00000234616	JRK	jerky homolog (mouse) [Source:HGNC Symbol;Acc:6199]	processed_transcript	2.42523	2.4974	2.31663	3.1616	3.15633	2.94414	2.41309	3.08736	0.355492	1.10714e-05	5.28213e-08
ENSG00000139793	MBNL2	muscleblind-like splicing regulator 2 [Source:HGNC Symbol;Acc:16746]	protein_coding	18.4359	18.4814	18.2476	13.9611	15.0212	13.8448	18.3883	14.2757	-0.365224	1.10714e-05	1.45166e-07
ENSG00000169184	MN1	meningioma (disrupted in balanced translocation) 1 [Source:HGNC Symbol;Acc:7180]	protein_coding	1.41392	1.28641	1.18866	0.744914	0.670675	0.878259	1.29633	0.764616	-0.761624	1.16932e-05	1.40781e-09
ENSG00000235927	NEXN-AS1	NEXN antisense RNA 1 [Source:HGNC Symbol;Acc:31983]	antisense	1.44315	1.44355	1.38938	2.48222	2.21459	2.50446	1.42536	2.40042	0.751961	1.17533e-05	1.00035e-10
ENSG00000090006	LTBP4	latent transforming growth factor beta binding protein 4 [Source:HGNC Symbol;Acc:6717]	protein_coding	53.2898	47.2438	48.0924	35.6821	31.6293	38.4762	49.542	35.2625	-0.490516	1.17559e-05	9.8172e-09
ENSG00000229645	LINC00341	long intergenic non-protein coding RNA 341 [Source:HGNC Symbol;Acc:20353]	lincRNA	6.61568	6.05062	6.49112	4.16403	3.63686	4.59376	6.38581	4.13155	-0.628186	1.18133e-05	1.68949e-10
ENSG00000182446	NPLOC4	nuclear protein localization 4 homolog (S. cerevisiae) [Source:HGNC Symbol;Acc:18261]	protein_coding	16.8902	16.0667	16.4835	19.9641	19.1141	19.4057	16.4802	19.4946	0.242347	1.20742e-05	2.15825e-07
ENSG00000167670	CHAF1A	chromatin assembly factor 1, subunit A (p150) [Source:HGNC Symbol;Acc:1910]	protein_coding	6.39141	6.22804	6.28163	7.69001	8.32339	8.50896	6.30036	8.17412	0.37563	1.23962e-05	1.12546e-09
ENSG00000182287	AP1S2	adaptor-related protein complex 1, sigma 2 subunit [Source:HGNC Symbol;Acc:560]	protein_coding	17.6226	16.2306	18.2909	19.9551	21.2524	21.4927	17.3813	20.9001	0.265968	1.19055e-05	5.00052e-07
ENSG00000177853	ZNF518A	zinc finger protein 518A [Source:HGNC Symbol;Acc:29009]	lincRNA	2.67403	2.5	2.67643	1.86294	1.86304	2.03409	2.61682	1.92002	-0.446691	1.29727e-05	6.9544e-09
ENSG00000188549	C15orf52	chromosome 15 open reading frame 52 [Source:HGNC Symbol;Acc:33488]	protein_coding	16.0888	15.3882	15.4479	19.1731	18.0036	18.3918	15.6416	18.5228	0.243914	1.25348e-05	7.22442e-07
ENSG00000162630	B3GALT2	UDP-Gal:betaGlcNAc beta 1,3-galactosyltransferase, polypeptide 2 [Source:HGNC Symbol;Acc:917]	protein_coding	2.80746	2.71592	2.81087	3.91773	3.92698	3.90083	2.77808	3.91518	0.49499	1.33528e-05	4.01893e-11
ENSG00000110047	EHD1	EH-domain containing 1 [Source:HGNC Symbol;Acc:3242]	protein_coding	24.446	22.9687	22.8924	28.131	26.3153	29.2283	23.4357	27.8915	0.251121	1.1546e-05	1.88614e-06
ENSG00000131871	VIMP	VCP-interacting membrane protein [Source:HGNC Symbol;Acc:30396]	protein_coding	18.0644	17.4141	20.0845	13.8434	14.0631	14.6224	18.521	14.1763	-0.385685	1.29727e-05	4.81996e-07
ENSG00000181260	RP11-145M9.3		pseudogene	2.23249	2.8249	2.91261	1.22067	1.1916	0.949967	2.65667	1.12075	-1.24516	1.38631e-05	2.47046e-10
ENSG00000164086	DUSP7	dual specificity phosphatase 7 [Source:HGNC Symbol;Acc:3073]	protein_coding	4.87097	4.50337	4.84679	6.12074	5.74771	6.0688	4.74037	5.97908	0.334923	1.3971e-05	1.58782e-08
ENSG00000171848	RRM2	ribonucleotide reductase M2 [Source:HGNC Symbol;Acc:10452]	protein_coding	17.3143	17.1966	18.4334	20.4669	22.0649	23.7965	17.6481	22.1095	0.32515	1.40376e-05	1.37757e-08
ENSG00000003436	TFPI	tissue factor pathway inhibitor (lipoprotein-associated coagulation inhibitor) [Source:HGNC Symbol;Acc:11760]	protein_coding	14.1838	13.3987	13.6873	10.7362	10.8828	11.2051	13.7566	10.9414	-0.330332	1.44359e-05	1.57709e-07
ENSG00000006118	TMEM132A	transmembrane protein 132A [Source:HGNC Symbol;Acc:31092]	protein_coding	11.5392	10.0719	10.8166	13.7343	12.3624	13.8478	10.8092	13.3148	0.300771	1.38868e-05	9.58446e-07
ENSG00000072415	MPP5	membrane protein, palmitoylated 5 (MAGUK p55 subfamily member 5) [Source:HGNC Symbol;Acc:18669]	protein_coding	7.34099	7.38278	7.44833	8.59187	9.844	9.51843	7.3907	9.3181	0.334325	1.53595e-05	3.79976e-09
ENSG00000145901	TNIP1	TNFAIP3 interacting protein 1 [Source:HGNC Symbol;Acc:16903]	protein_coding	14.8388	14.7298	14.8715	17.6312	18.1677	17.3283	14.8134	17.7091	0.257592	1.57525e-05	5.17798e-08
ENSG00000129646	QRICH2	glutamine rich 2 [Source:HGNC Symbol;Acc:25326]	protein_coding	0.635281	0.498038	0.46042	0.261588	0.183986	0.251651	0.531247	0.232408	-1.19272	1.61795e-05	3.45492e-09
ENSG00000225511	LINC00475	long intergenic non-protein coding RNA 475 [Source:HGNC Symbol;Acc:23569]	lincRNA	4.70621	4.48583	4.22715	5.9929	5.61611	6.13707	4.47306	5.91536	0.403204	1.64187e-05	1.40368e-08
ENSG00000177084	POLE	polymerase (DNA directed), epsilon, catalytic subunit [Source:HGNC Symbol;Acc:9177]	protein_coding	2.11932	2.0889	1.82595	2.60191	2.57837	2.54404	2.01139	2.57477	0.356251	1.63484e-05	9.72149e-08
ENSG00000075618	FSCN1	fascin homolog 1, actin-bundling protein (Strongylocentrotus purpuratus) [Source:HGNC Symbol;Acc:11148]	protein_coding	85.5911	79.1154	79.4336	96.2812	94.5916	111.751	81.38	100.875	0.309815	1.63484e-05	9.08729e-07
ENSG00000075624	ACTB	actin, beta [Source:HGNC Symbol;Acc:132]	protein_coding	1658.57	1613.13	1709.4	1910.92	1926.95	1943.79	1660.37	1927.22	0.215021	1.74953e-05	2.11619e-07
ENSG00000166669	ATF7IP2	activating transcription factor 7 interacting protein 2 [Source:HGNC Symbol;Acc:20397]	protein_coding	0.467792	0.443743	0.479987	0.184513	0.209464	0.244957	0.463841	0.212978	-1.12293	1.78114e-05	1.03481e-10
ENSG00000088756	ARHGAP28	Rho GTPase activating protein 28 [Source:HGNC Symbol;Acc:25509]	protein_coding	2.65751	2.85844	2.5225	1.92071	1.94482	1.97475	2.67949	1.94676	-0.46088	1.84568e-05	8.71272e-08
ENSG00000108854	SMURF2	SMAD specific E3 ubiquitin protein ligase 2 [Source:HGNC Symbol;Acc:16809]	protein_coding	86.3404	87.447	87.9707	103.377	104.336	98.082	87.2527	101.931	0.224327	1.61795e-05	2.45747e-06
ENSG00000198901	PRC1	protein regulator of cytokinesis 1 [Source:HGNC Symbol;Acc:9341]	protein_coding	12.2428	12.2701	12.1823	14.6387	16.4366	14.8739	12.2317	15.3164	0.324448	1.87288e-05	8.87128e-09
ENSG00000137310	TCF19	transcription factor 19 [Source:HGNC Symbol;Acc:11629]	protein_coding	2.84967	2.44646	2.48552	3.46167	3.6103	3.85817	2.59389	3.64338	0.490163	1.89446e-05	7.22111e-09
ENSG00000134440	NARS	asparaginyl-tRNA synthetase [Source:HGNC Symbol;Acc:7643]	protein_coding	69.6113	71.99	74.4384	56.8942	58.6959	57.6095	72.0132	57.7332	-0.318861	1.78431e-05	1.11158e-06
ENSG00000112902	SEMA5A	sema domain, seven thrombospondin repeats (type 1 and type 1-like), transmembrane domain (TM) and short cytoplasmic domain, (semaphorin) 5A [Source:HGNC Symbol;Acc:10736]	protein_coding	9.77782	9.92197	8.45761	12.6195	12.6754	11.5473	9.3858	12.2808	0.387848	1.89377e-05	4.08367e-08
ENSG00000185697	MYBL1	v-myb myeloblastosis viral oncogene homolog (avian)-like 1 [Source:HGNC Symbol;Acc:7547]	protein_coding	7.16544	6.77387	7.05042	8.16661	8.83512	8.64766	6.99658	8.54979	0.289241	2.01856e-05	4.40703e-08
ENSG00000157613	CREB3L1	cAMP responsive element binding protein 3-like 1 [Source:HGNC Symbol;Acc:18856]	protein_coding	76.0781	74.1238	71.5911	89.0186	82.1205	89.8435	73.931	86.9942	0.23474	1.4303e-05	5.97913e-06
ENSG00000133110	POSTN	periostin, osteoblast specific factor [Source:HGNC Symbol;Acc:16953]	protein_coding	26.0565	25.8581	26.7434	18.9733	21.2994	18.5573	26.2193	19.61	-0.419039	2.07868e-05	1.77705e-08
ENSG00000013810	TACC3	transforming, acidic coiled-coil containing protein 3 [Source:HGNC Symbol;Acc:11524]	protein_coding	7.81875	7.75442	7.6002	9.20407	9.41157	10.1425	7.72446	9.58606	0.311504	2.13275e-05	3.41704e-08
ENSG00000198467	TPM2	tropomyosin 2 (beta) [Source:HGNC Symbol;Acc:12011]	protein_coding	385.632	399.791	426.602	471.714	470.915	474.172	404.008	472.267	0.225218	1.93297e-05	2.43632e-06
ENSG00000066135	KDM4A	lysine (K)-specific demethylase 4A [Source:HGNC Symbol;Acc:22978]	protein_coding	11.5548	11.7948	10.8512	8.74807	8.77335	8.88956	11.4003	8.80366	-0.372892	2.25368e-05	4.7579e-07
ENSG00000130309	GLT25D1	glycosyltransferase 25 domain containing 1 [Source:HGNC Symbol;Acc:26182]	protein_coding	49.3744	48.114	47.2142	56.8243	54.1329	58.9477	48.2342	56.635	0.231638	2.18293e-05	2.13261e-06
ENSG00000100979	PLTP	phospholipid transfer protein [Source:HGNC Symbol;Acc:9093]	protein_coding	29.4347	28.7049	29.872	23.2462	22.2347	22.9258	29.3372	22.8022	-0.363557	2.50548e-05	5.56083e-08
ENSG00000188229	TUBB4B	tubulin, beta 4B class IVb [Source:HGNC Symbol;Acc:20771]	protein_coding	158.83	155.574	160.8	179.862	182.771	194.488	158.401	185.707	0.229442	2.50548e-05	4.09806e-07
ENSG00000148411	NACC2	NACC family member 2, BEN and BTB (POZ) domain containing [Source:HGNC Symbol;Acc:23846]	protein_coding	9.33596	8.78209	8.88772	10.8174	10.5648	11.0364	9.00192	10.8062	0.263552	2.74517e-05	9.56809e-08
ENSG00000054118	THRAP3	thyroid hormone receptor associated protein 3 [Source:HGNC Symbol;Acc:22964]	protein_coding	31.9996	32.791	30.9363	37.2964	38.0944	37.3181	31.909	37.5697	0.235605	2.67347e-05	1.04022e-06
ENSG00000139211	AMIGO2	adhesion molecule with Ig-like domain 2 [Source:HGNC Symbol;Acc:24073]	protein_coding	1.89736	1.91914	2.16382	2.99654	3.07373	2.59656	1.99344	2.88895	0.535285	2.79242e-05	4.52325e-08
ENSG00000154978	VOPP1	vesicular, overexpressed in cancer, prosurvival protein 1 [Source:HGNC Symbol;Acc:34518]	protein_coding	19.1743	19.1101	18.8774	22.0736	22.817	23.0439	19.0539	22.6448	0.249096	2.83149e-05	5.20851e-08
ENSG00000132780	NASP	nuclear autoantigenic sperm protein (histone-binding) [Source:HGNC Symbol;Acc:7644]	protein_coding	10.9647	11.0036	11.7277	12.835	13.4923	13.923	11.232	13.4168	0.256425	2.82922e-05	2.63113e-07
ENSG00000104812	GYS1	glycogen synthase 1 (muscle) [Source:HGNC Symbol;Acc:4706]	protein_coding	19.2728	19.0866	18.5462	21.9335	22.1953	24.0967	18.9685	22.7418	0.261739	2.87527e-05	4.05558e-07
ENSG00000183722	LHFP	lipoma HMGIC fusion partner [Source:HGNC Symbol;Acc:6586]	protein_coding	34.1967	34.9493	34.187	42.052	39.9821	40.9087	34.4443	40.9809	0.250686	2.88384e-05	3.43036e-07
ENSG00000147065	MSN	moesin [Source:HGNC Symbol;Acc:7373]	protein_coding	235.398	244.663	235.478	274.898	283.222	272.297	238.513	276.806	0.214804	2.57667e-05	3.54448e-06
ENSG00000182718	ANXA2	annexin A2 [Source:HGNC Symbol;Acc:537]	protein_coding	165.485	174.291	184.617	198.181	215.764	212.088	174.798	208.678	0.255592	2.82713e-05	1.30169e-06
ENSG00000198900	TOP1	topoisomerase (DNA) I [Source:HGNC Symbol;Acc:11986]	protein_coding	61.9846	63.8717	61.8069	49.1579	50.7348	51.3742	62.5544	50.4223	-0.311049	2.88384e-05	1.56568e-06
ENSG00000204256	BRD2	bromodomain containing 2 [Source:HGNC Symbol;Acc:1103]	protein_coding	32.596	32.8883	31.639	26.2149	25.4191	26.3042	32.3744	25.9794	-0.317485	2.96742e-05	1.1997e-06
ENSG00000133119	RFC3	replication factor C (activator 1) 3, 38kDa [Source:HGNC Symbol;Acc:9971]	protein_coding	3.62978	3.4434	4.05598	4.67175	5.23044	5.54274	3.70972	5.14831	0.472789	3.13681e-05	8.50571e-08
ENSG00000063660	GPC1	glypican 1 [Source:HGNC Symbol;Acc:4449]	protein_coding	96.8501	88.7779	89.2065	108.049	101.478	111.033	91.6115	106.854	0.222034	9.69509e-06	2.21585e-05
ENSG00000237892	KLF7-IT1	KLF7 intronic transcript 1 (non-protein coding) [Source:HGNC Symbol;Acc:41355]	sense_intronic	1.84517	1.71384	1.73953	0.536945	0.468368	0.335453	1.76618	0.446922	-1.98254	3.21768e-05	4.31036e-11
ENSG00000171603	CLSTN1	calsyntenin 1 [Source:HGNC Symbol;Acc:17447]	protein_coding	42.4809	41.8381	39.537	49.1432	47.7914	47.5738	41.2853	48.1695	0.22249	2.49217e-05	7.83288e-06
ENSG00000147027	TMEM47	transmembrane protein 47 [Source:HGNC Symbol;Acc:18515]	protein_coding	23.5987	23.1943	23.6518	27.9091	29.7673	27.2417	23.4816	28.306	0.269578	3.29053e-05	1.32142e-07
ENSG00000092853	CLSPN	claspin [Source:HGNC Symbol;Acc:19715]	protein_coding	2.3687	2.40111	2.06838	2.93697	3.11818	3.18189	2.2794	3.07901	0.433816	3.32256e-05	5.16629e-08
ENSG00000101412	E2F1	E2F transcription factor 1 [Source:HGNC Symbol;Acc:3113]	protein_coding	5.45117	4.67373	5.53257	7.0834	6.55168	7.17629	5.21916	6.93713	0.410521	3.3831e-05	1.62488e-07
ENSG00000188206	HNRNPU-AS1	HNRNPU antisense RNA 1 [Source:HGNC Symbol;Acc:27651]	processed_transcript	0.535178	0.409688	0.551027	0.868383	0.923108	0.787188	0.498631	0.859559	0.785625	3.45876e-05	6.34661e-09
ENSG00000124193	SRSF6	serine/arginine-rich splicing factor 6 [Source:HGNC Symbol;Acc:10788]	protein_coding	61.5731	59.561	65.2407	49.8066	48.9032	51.3922	62.125	50.034	-0.312265	3.13681e-05	3.38946e-06
ENSG00000198342	ZNF442	zinc finger protein 442 [Source:HGNC Symbol;Acc:20877]	protein_coding	0.697342	0.610162	0.557011	0.243236	0.221554	0.235641	0.621505	0.233477	-1.41249	3.48586e-05	1.57521e-10
ENSG00000176890	TYMS	thymidylate synthetase [Source:HGNC Symbol;Acc:12441]	protein_coding	28.5325	26.6262	28.5121	32.5135	34.6685	37.3805	27.8903	34.8542	0.321569	3.61128e-05	5.40632e-08
ENSG00000121152	NCAPH	non-SMC condensin I complex, subunit H [Source:HGNC Symbol;Acc:1112]	protein_coding	3.72577	3.63183	4.16215	4.9543	5.05375	5.47126	3.83991	5.15977	0.426233	3.62583e-05	1.76375e-08
ENSG00000108960	MMD	monocyte to macrophage differentiation-associated [Source:HGNC Symbol;Acc:7153]	protein_coding	13.4438	12.0639	13.2933	9.90722	9.3203	9.90483	12.9336	9.71079	-0.413469	3.75522e-05	2.15825e-07
ENSG00000156970	BUB1B	budding uninhibited by benzimidazoles 1 homolog beta (yeast) [Source:HGNC Symbol;Acc:1149]	protein_coding	4.95229	5.13133	5.39268	6.41048	7.68781	6.69244	5.15877	6.93024	0.425879	3.95006e-05	2.11462e-08
ENSG00000159348	CYB5R1	cytochrome b5 reductase 1 [Source:HGNC Symbol;Acc:13397]	protein_coding	10.7899	10.6385	11.7276	13.2011	13.3625	13.6533	11.052	13.4057	0.278533	3.94483e-05	1.84987e-07
ENSG00000176435	CLEC14A	C-type lectin domain family 14, member A [Source:HGNC Symbol;Acc:19832]	protein_coding	10.7466	10.3205	10.8381	12.9312	13.311	14.1142	10.6351	13.4522	0.339008	4.07816e-05	8.44809e-09
ENSG00000206190	ATP10A	ATPase, class V, type 10A [Source:HGNC Symbol;Acc:13542]	protein_coding	3.00039	3.14882	2.91944	3.86642	3.79222	3.70516	3.02288	3.78793	0.325486	4.06872e-05	1.56563e-07
ENSG00000261824	LINC00662	long intergenic non-protein coding RNA 662 [Source:HGNC Symbol;Acc:27122]	lincRNA	2.33407	2.22751	2.42675	1.49322	1.27076	1.24037	2.32944	1.33478	-0.803381	4.11668e-05	1.89213e-09
ENSG00000132256	TRIM5	tripartite motif containing 5 [Source:HGNC Symbol;Acc:16276]	protein_coding	14.4579	14.694	14.8349	11.1407	11.4995	12.0368	14.6623	11.559	-0.343088	4.14655e-05	4.65567e-07
ENSG00000151503	NCAPD3	non-SMC condensin II complex, subunit D3 [Source:HGNC Symbol;Acc:28952]	protein_coding	2.73334	2.8191	2.70003	3.34265	3.59015	3.33762	2.75082	3.42347	0.315597	4.19179e-05	1.45257e-07
ENSG00000071127	WDR1	WD repeat domain 1 [Source:HGNC Symbol;Acc:12754]	protein_coding	89.731	91.4766	88.2768	103.87	102.801	104.853	89.8281	103.841	0.209138	4.12621e-05	1.83081e-06
ENSG00000138685	FGF2	fibroblast growth factor 2 (basic) [Source:HGNC Symbol;Acc:3676]	protein_coding	15.0269	14.4937	14.3683	11.9152	11.2998	11.4118	14.6297	11.5422	-0.341974	4.33848e-05	6.15298e-07
ENSG00000134531	EMP1	epithelial membrane protein 1 [Source:HGNC Symbol;Acc:3333]	protein_coding	77.0109	75.7844	80.1059	63.2333	64.486	60.7961	77.6337	62.8385	-0.305036	3.90926e-05	6.55926e-06
ENSG00000101335	MYL9	myosin, light chain 9, regulatory [Source:HGNC Symbol;Acc:15754]	protein_coding	362.268	376.546	362.937	459.35	429.689	417.843	367.25	435.627	0.246331	4.16564e-05	4.68709e-06
ENSG00000065809	FAM107B	family with sequence similarity 107, member B [Source:HGNC Symbol;Acc:23726]	protein_coding	10.8372	10.6012	11.6547	13.1117	14.0078	12.8189	11.031	13.3128	0.271244	4.56559e-05	8.64675e-07
ENSG00000136026	CKAP4	cytoskeleton-associated protein 4 [Source:HGNC Symbol;Acc:16991]	protein_coding	237.33	225.197	238.508	270.169	272.522	266.416	233.678	269.702	0.206842	4.48657e-05	1.7143e-06
ENSG00000176678	FOXL1	forkhead box L1 [Source:HGNC Symbol;Acc:3817]	protein_coding	32.4033	31.0605	30.736	36.2838	35.7951	39.3677	31.3999	37.1488	0.242557	4.48657e-05	2.30873e-06
ENSG00000112078	KCTD20	potassium channel tetramerisation domain containing 20 [Source:HGNC Symbol;Acc:21052]	protein_coding	15.9916	17.1499	16.6469	19.71	20.3123	18.8458	16.5962	19.6227	0.241672	3.95911e-05	7.79912e-06
ENSG00000188158	NHS	Nance-Horan syndrome (congenital cataracts and dental anomalies) [Source:HGNC Symbol;Acc:7820]	protein_coding	0.974005	0.90788	0.885214	0.570878	0.624723	0.5647	0.922366	0.586767	-0.652552	4.86108e-05	5.99e-09
ENSG00000113552	GNPDA1	glucosamine-6-phosphate deaminase 1 [Source:HGNC Symbol;Acc:4417]	protein_coding	19.9212	20.4648	21.9944	16.233	15.9548	14.1452	20.7935	15.4443	-0.429055	4.86108e-05	3.00582e-07
ENSG00000119280	C1orf198	chromosome 1 open reading frame 198 [Source:HGNC Symbol;Acc:25900]	protein_coding	25.3958	24.7389	24.2564	29.0941	28.381	29.8121	24.797	29.0957	0.23064	4.86108e-05	8.01756e-07
ENSG00000179262	RAD23A	RAD23 homolog A (S. cerevisiae) [Source:HGNC Symbol;Acc:9812]	protein_coding	50.5566	47.3222	48.4849	59.1339	56.9652	56.6682	48.7879	57.5891	0.239272	4.84282e-05	1.29467e-06
ENSG00000092820	EZR	ezrin [Source:HGNC Symbol;Acc:12691]	protein_coding	38.0972	37.2631	37.4561	44.5887	42.2351	45.479	37.6055	44.1009	0.229867	4.85434e-05	1.33016e-06
ENSG00000065328	MCM10	minichromosome maintenance complex component 10 [Source:HGNC Symbol;Acc:18043]	protein_coding	1.65584	1.9279	1.64419	2.30206	2.5154	2.56778	1.74264	2.46175	0.498405	4.99736e-05	2.77938e-08
ENSG00000159674	SPON2	spondin 2, extracellular matrix protein [Source:HGNC Symbol;Acc:11253]	protein_coding	62.06	55.5108	60.1116	69.9503	65.5974	72.525	59.2275	69.3576	0.227787	2.75493e-05	2.26915e-05
ENSG00000135931	ARMC9	armadillo repeat containing 9 [Source:HGNC Symbol;Acc:20730]	protein_coding	8.34549	8.07807	7.70824	6.60397	6.09932	6.1513	8.04393	6.28487	-0.356019	4.56559e-05	5.59247e-06
ENSG00000155034	FBXL18	F-box and leucine-rich repeat protein 18 [Source:HGNC Symbol;Acc:21874]	protein_coding	1.8581	1.78517	1.78306	2.69972	2.27884	2.50336	1.80878	2.49397	0.46343	5.1659e-05	1.65149e-07
ENSG00000005007	UPF1	UPF1 regulator of nonsense transcripts homolog (yeast) [Source:HGNC Symbol;Acc:9962]	protein_coding	16.2179	15.6219	15.3621	18.4351	17.8378	19.7047	15.7339	18.6592	0.246005	4.95898e-05	2.30174e-06
ENSG00000235513	RP4-756G23.5		antisense	0.839649	0.874421	0.712852	0.322735	0.334671	0.296624	0.808974	0.31801	-1.34702	5.24193e-05	2.95419e-10
ENSG00000085063	CD59	CD59 molecule, complement regulatory protein [Source:HGNC Symbol;Acc:1689]	protein_coding	105.975	110	120.077	130.647	135.631	131.224	112.017	132.501	0.242278	4.85003e-05	4.05403e-06
ENSG00000108256	NUFIP2	nuclear fragile X mental retardation protein interacting protein 2 [Source:HGNC Symbol;Acc:17634]	protein_coding	9.57742	9.99281	9.43674	11.758	11.5002	10.9164	9.66899	11.3915	0.236525	3.95911e-05	1.305e-05
ENSG00000124762	CDKN1A	cyclin-dependent kinase inhibitor 1A (p21, Cip1) [Source:HGNC Symbol;Acc:1784]	protein_coding	324.059	315.075	328.542	262.101	262.155	265.75	322.559	263.335	-0.292661	5.30246e-05	1.03574e-06
ENSG00000130517	PGPEP1	pyroglutamyl-peptidase I [Source:HGNC Symbol;Acc:13568]	protein_coding	8.47651	7.95245	8.12863	6.53295	5.77941	6.31189	8.18586	6.20808	-0.398987	5.40926e-05	3.27534e-07
ENSG00000166963	MAP1A	microtubule-associated protein 1A [Source:HGNC Symbol;Acc:6835]	protein_coding	46.3864	50.1889	40.2896	56.7292	58.7974	54.7967	45.6216	56.7745	0.315524	1.30836e-05	4.21359e-05
ENSG00000188153	COL4A5	collagen, type IV, alpha 5 [Source:HGNC Symbol;Acc:2207]	protein_coding	18.0277	18.1935	17.1143	14.2644	14.5711	13.9037	17.7785	14.2464	-0.319537	4.80497e-05	7.50626e-06
ENSG00000069399	BCL3	B-cell CLL/lymphoma 3 [Source:HGNC Symbol;Acc:998]	protein_coding	8.05423	7.36253	7.72284	10.3122	9.0412	11.4029	7.7132	10.2521	0.410517	5.63141e-05	2.94382e-07
ENSG00000234684	SDCBP2-AS1	SDCBP2 antisense RNA 1 [Source:HGNC Symbol;Acc:44314]	lincRNA	2.5465	2.25107	1.96812	1.19948	1.07799	1.28909	2.25523	1.18885	-0.923702	5.66392e-05	1.04265e-08
ENSG00000108306	FBXL20	F-box and leucine-rich repeat protein 20 [Source:HGNC Symbol;Acc:24679]	protein_coding	2.01809	1.80894	1.87349	1.3586	1.32857	1.41167	1.90017	1.36628	-0.475882	5.73167e-05	2.86137e-08
ENSG00000005379	BZRAP1	benzodiazapine receptor (peripheral) associated protein 1 [Source:HGNC Symbol;Acc:16831]	protein_coding	0.959772	0.956786	0.942427	0.624305	0.576793	0.553734	0.952995	0.584944	-0.70417	5.77433e-05	2.1613e-09
ENSG00000134900	TPP2	tripeptidyl peptidase II [Source:HGNC Symbol;Acc:12016]	protein_coding	18.5124	19.3937	18.6556	14.6846	15.588	14.9321	18.8539	15.0682	-0.323354	5.37374e-05	4.16627e-06
ENSG00000172613	RAD9A	RAD9 homolog A (S. pombe) [Source:HGNC Symbol;Acc:9827]	protein_coding	3.23558	2.8006	2.7789	2.03298	1.73923	1.87715	2.93836	1.88312	-0.641886	5.79855e-05	1.22286e-07
ENSG00000162687	KCNT2	potassium channel, subfamily T, member 2 [Source:HGNC Symbol;Acc:18866]	protein_coding	0.477304	0.438566	0.476156	0.220335	0.216021	0.212737	0.464009	0.216364	-1.10069	5.8744e-05	3.02995e-10
ENSG00000181751	C5orf30	chromosome 5 open reading frame 30 [Source:HGNC Symbol;Acc:25052]	protein_coding	2.00563	1.72214	1.8587	2.87593	2.61852	2.47864	1.86216	2.6577	0.513203	5.92966e-05	2.58332e-07
ENSG00000235847	LDHAP7	lactate dehydrogenase A pseudogene 7 [Source:HGNC Symbol;Acc:23144]	pseudogene	3.46063	4.1021	3.81463	5.48826	6.76277	6.14766	3.79246	6.1329	0.693436	5.99685e-05	2.75699e-08
ENSG00000149485	FADS1	fatty acid desaturase 1 [Source:HGNC Symbol;Acc:3574]	protein_coding	18.9304	19.6447	18.9196	15.3871	15.1792	15.8404	19.1649	15.4689	-0.309093	5.90896e-05	3.26142e-06
ENSG00000181873	IBA57	IBA57, iron-sulfur cluster assembly homolog (S. cerevisiae) [Source:HGNC Symbol;Acc:27302]	protein_coding	1.20447	1.07249	1.06923	0.767278	0.758704	0.709543	1.1154	0.745175	-0.581908	6.34018e-05	3.83827e-08
ENSG00000143799	PARP1	poly (ADP-ribose) polymerase 1 [Source:HGNC Symbol;Acc:270]	protein_coding	19.4243	20.1341	19.5482	22.2851	23.2288	23.8977	19.7022	23.1372	0.231854	6.23356e-05	1.12828e-06
ENSG00000011007	TCEB3	transcription elongation factor B (SIII), polypeptide 3 (110kDa, elongin A) [Source:HGNC Symbol;Acc:11620]	protein_coding	10.0589	10.2361	9.77635	11.9347	12.1158	12.0641	10.0238	12.0382	0.264197	6.60306e-05	2.61761e-07
ENSG00000211448	DIO2	deiodinase, iodothyronine, type II [Source:HGNC Symbol;Acc:2884]	protein_coding	0.555525	0.594764	0.634944	0.82201	1.03748	0.970438	0.595078	0.943309	0.664652	6.91833e-05	2.17806e-08
ENSG00000182985	CADM1	cell adhesion molecule 1 [Source:HGNC Symbol;Acc:5951]	protein_coding	28.8078	28.7592	28.0321	33.1643	34.3232	32.1914	28.533	33.2263	0.219692	6.65481e-05	5.97645e-06
ENSG00000173559	NABP1	nucleic acid binding protein 1 [Source:HGNC Symbol;Acc:26232]	protein_coding	50.0007	51.7336	45.5535	67.149	68.8871	58.9108	49.096	64.9823	0.404443	7.33187e-05	2.16658e-08
ENSG00000010810	FYN	FYN oncogene related to SRC, FGR, YES [Source:HGNC Symbol;Acc:4037]	protein_coding	4.65207	4.91889	4.64779	3.57318	3.68043	3.55406	4.73958	3.60256	-0.395739	7.44253e-05	3.4619e-07
ENSG00000115966	ATF2	activating transcription factor 2 [Source:HGNC Symbol;Acc:784]	protein_coding	9.71677	8.92247	8.96117	6.95721	7.38572	7.14449	9.20014	7.16247	-0.361198	7.31458e-05	1.9352e-06
ENSG00000130487	KLHDC7B	kelch domain containing 7B [Source:HGNC Symbol;Acc:25145]	protein_coding	0.170193	0.0988002	0.136794	0.00691912	0.00932749	0	0.135262	0.00541554	-4.64251	7.55335e-05	2.64242e-09
ENSG00000127463	EMC1	ER membrane protein complex subunit 1 [Source:HGNC Symbol;Acc:28957]	protein_coding	16.5326	17.0202	16.2974	19.4585	19.072	19.4371	16.6167	19.3226	0.21765	7.41589e-05	3.04027e-06
ENSG00000123395	C12orf44	chromosome 12 open reading frame 44 [Source:HGNC Symbol;Acc:25679]	protein_coding	12.0697	12.6421	12.2834	9.13151	9.66838	9.63301	12.3317	9.47763	-0.379777	7.75803e-05	4.07887e-07
ENSG00000108551	RASD1	RAS, dexamethasone-induced 1 [Source:HGNC Symbol;Acc:15828]	protein_coding	1.91266	1.37047	1.23822	0.592445	0.686848	0.676406	1.50712	0.651899	-1.20907	8.01837e-05	3.69293e-08
ENSG00000186871	ERCC6L	excision repair cross-complementing rodent repair deficiency, complementation group 6-like [Source:HGNC Symbol;Acc:20794]	protein_coding	1.47319	1.58511	1.54082	2.25335	2.31504	2.00904	1.53304	2.19248	0.516168	8.01837e-05	7.45467e-08
ENSG00000131652	THOC6	THO complex 6 homolog (Drosophila) [Source:HGNC Symbol;Acc:28369]	protein_coding	14.8273	12.607	15.0397	10.5626	9.64338	10.0964	14.158	10.1008	-0.487151	7.96971e-05	1.02627e-06
ENSG00000224163	RP11-309L24.6		pseudogene	36.3041	33.9124	34.0132	43.2601	41.5391	46.6239	34.7432	43.8077	0.334453	8.39786e-05	2.60498e-07
ENSG00000163466	ARPC2	actin related protein 2/3 complex, subunit 2, 34kDa [Source:HGNC Symbol;Acc:705]	protein_coding	60.8083	59.6903	64.8683	69.4387	72.6301	72.4426	61.789	71.5038	0.210671	8.39786e-05	4.67278e-06
ENSG00000259207	ITGB3	integrin, beta 3 (platelet glycoprotein IIIa, antigen CD61) [Source:HGNC Symbol;Acc:6156]	protein_coding	2.0311	1.91925	2.00592	2.78362	2.45021	2.72726	1.98542	2.6537	0.418558	8.93675e-05	1.40943e-07
ENSG00000137812	CASC5	cancer susceptibility candidate 5 [Source:HGNC Symbol;Acc:24054]	protein_coding	2.29926	2.35177	2.16905	2.80148	2.97938	2.77064	2.27336	2.8505	0.326388	9.03622e-05	4.74103e-07
ENSG00000175376	EIF1AD	eukaryotic translation initiation factor 1A domain containing [Source:HGNC Symbol;Acc:28147]	protein_coding	5.17176	4.94574	5.4795	6.37372	6.75645	6.94267	5.199	6.69095	0.363976	9.71193e-05	3.01292e-08
ENSG00000178381	ZFAND2A	zinc finger, AN1-type domain 2A [Source:HGNC Symbol;Acc:28073]	protein_coding	4.55949	4.93433	5.31535	3.4828	3.13005	3.3594	4.93639	3.32408	-0.570501	9.69796e-05	1.71818e-07
ENSG00000109805	NCAPG	non-SMC condensin I complex, subunit G [Source:HGNC Symbol;Acc:24304]	protein_coding	4.466	4.55635	4.9454	5.49891	5.90542	6.22307	4.65591	5.8758	0.33572	9.70553e-05	4.60275e-07
ENSG00000101384	JAG1	jagged 1 [Source:HGNC Symbol;Acc:6188]	protein_coding	4.47072	4.34377	4.35887	3.39595	3.24973	3.19186	4.39112	3.27918	-0.421254	9.76178e-05	5.33044e-08
ENSG00000143476	DTL	denticleless E3 ubiquitin protein ligase homolog (Drosophila) [Source:HGNC Symbol;Acc:30288]	protein_coding	2.86062	3.09181	2.93825	3.60309	4.01919	4.03669	2.96356	3.88633	0.391077	9.89683e-05	1.31659e-07
ENSG00000197976	AKAP17A	A kinase (PRKA) anchor protein 17A [Source:HGNC Symbol;Acc:18783]	protein_coding	15.1415	14.593	14.6184	11.7072	11.3542	11.6601	14.7843	11.5738	-0.353199	9.95388e-05	3.49558e-07
ENSG00000161203	AP2M1	adaptor-related protein complex 2, mu 1 subunit [Source:HGNC Symbol;Acc:564]	protein_coding	116.46	119.191	122.252	134.741	138.66	139.135	119.301	137.512	0.204955	9.79451e-05	2.10928e-06
ENSG00000261026	CTD-3247F14.2		sense_overlapping	0.152755	0.124148	0.0350793	0.00828024	0.00558119	0.0109927	0.103994	0.0082847	-3.64991	0.000100458	2.20109e-06
ENSG00000181026	AEN	apoptosis enhancing nuclease [Source:HGNC Symbol;Acc:25722]	protein_coding	16.2142	16.042	15.8553	12.8399	12.7258	12.797	16.0372	12.7876	-0.326679	0.000103054	4.53962e-07
ENSG00000198113	TOR4A	torsin family 4, member A [Source:HGNC Symbol;Acc:25981]	protein_coding	15.7184	14.4644	13.847	17.6807	16.7752	18.9105	14.6766	17.7888	0.277453	9.47172e-05	9.97597e-06
ENSG00000181039	ANKRD34A	ankyrin repeat domain 34A [Source:HGNC Symbol;Acc:27639]	protein_coding	1.57659	1.53801	1.60194	2.412	2.09304	2.35025	1.57218	2.2851	0.539487	0.000106038	4.26389e-08
ENSG00000136732	GYPC	glycophorin C (Gerbich blood group) [Source:HGNC Symbol;Acc:4704]	protein_coding	21.7338	21.1452	21.8776	16.8471	16.7921	17.555	21.5855	17.0647	-0.339047	0.000106471	4.0417e-07
ENSG00000068305	MEF2A	myocyte enhancer factor 2A [Source:HGNC Symbol;Acc:6993]	protein_coding	12.1429	11.3669	11.5157	9.22875	9.66006	8.89983	11.6751	9.26288	-0.333908	9.96781e-05	7.22124e-06
ENSG00000128595	CALU	calumenin [Source:HGNC Symbol;Acc:1458]	protein_coding	330.032	332.945	342.416	388.993	405.636	374.946	335.131	389.858	0.218226	0.000102809	4.91786e-06
ENSG00000172349	IL16	interleukin 16 [Source:HGNC Symbol;Acc:5980]	protein_coding	1.68164	1.70592	1.37009	1.06342	1.12839	1.0784	1.58588	1.09007	-0.540864	0.00010512	2.87045e-06
ENSG00000138675	FGF5	fibroblast growth factor 5 [Source:HGNC Symbol;Acc:3683]	protein_coding	41.1798	39.6527	38.7815	48.6058	49.4594	44.623	39.8713	47.5627	0.254479	0.000103736	4.68608e-06
ENSG00000126787	DLGAP5	discs, large (Drosophila) homolog-associated protein 5 [Source:HGNC Symbol;Acc:16864]	protein_coding	7.42432	7.98347	7.99894	9.37653	10.3814	9.46715	7.80224	9.74171	0.320287	0.000111904	8.59676e-07
ENSG00000096433	ITPR3	inositol 1,4,5-trisphosphate receptor, type 3 [Source:HGNC Symbol;Acc:6182]	protein_coding	8.20453	8.24393	7.43073	6.30189	5.69438	5.50839	7.95973	5.83489	-0.448014	0.000112939	2.96516e-07
ENSG00000114735	HEMK1	HemK methyltransferase family member 1 [Source:HGNC Symbol;Acc:24923]	protein_coding	5.25681	4.85382	4.86445	3.95984	3.62914	3.88241	4.9917	3.8238	-0.384523	0.000113013	2.00127e-06
ENSG00000025796	SEC63	SEC63 homolog (S. cerevisiae) [Source:HGNC Symbol;Acc:21082]	protein_coding	19.2302	19.0523	19.0204	15.2558	15.4301	15.7143	19.1009	15.4667	-0.304473	0.000114047	1.23911e-06
ENSG00000146376	ARHGAP18	Rho GTPase activating protein 18 [Source:HGNC Symbol;Acc:21035]	protein_coding	10.8095	10.2567	10.9053	12.8142	13.1332	12.3298	10.6572	12.759	0.259693	0.000114047	1.30169e-06
ENSG00000103485	QPRT	quinolinate phosphoribosyltransferase [Source:HGNC Symbol;Acc:9755]	protein_coding	10.8633	10.686	11.2503	8.43339	8.53404	8.31683	10.9332	8.42809	-0.375439	0.000115264	1.85389e-07
ENSG00000123737	EXOSC9	exosome component 9 [Source:HGNC Symbol;Acc:9137]	protein_coding	5.63725	5.25484	5.99064	6.77602	7.93875	7.13595	5.62758	7.28357	0.372132	0.000117686	2.75163e-07
ENSG00000129116	PALLD	palladin, cytoskeletal associated protein [Source:HGNC Symbol;Acc:17068]	protein_coding	58.0029	58.4078	57.0815	64.7421	68.336	66.6481	57.8307	66.5754	0.203153	0.000113752	4.86665e-06
ENSG00000102901	CENPT	centromere protein T [Source:HGNC Symbol;Acc:25787]	protein_coding	8.39614	8.10959	9.03969	10.1041	10.2389	10.4742	8.51514	10.2724	0.270669	0.000119295	7.21661e-07
ENSG00000127586	CHTF18	CTF18, chromosome transmission fidelity factor 18 homolog (S. cerevisiae) [Source:HGNC Symbol;Acc:18435]	protein_coding	2.8547	2.35691	2.64201	3.31864	3.26694	3.6351	2.61787	3.40689	0.380062	0.000119968	1.11192e-06
ENSG00000111962	UST	uronyl-2-sulfotransferase [Source:HGNC Symbol;Acc:17223]	protein_coding	6.90047	6.73305	6.67795	5.1369	5.21968	5.00189	6.77049	5.11949	-0.40326	0.000121271	9.56809e-08
ENSG00000085382	HACE1	HECT domain and ankyrin repeat containing E3 ubiquitin protein ligase 1 [Source:HGNC Symbol;Acc:21033]	protein_coding	2.45818	2.39515	2.25803	1.70423	1.76911	1.76303	2.37045	1.74546	-0.441557	0.000121271	1.31272e-07
ENSG00000137821	LRRC49	leucine rich repeat containing 49 [Source:HGNC Symbol;Acc:25965]	protein_coding	1.57214	1.72282	1.73569	1.1678	1.02633	1.18632	1.67688	1.12682	-0.57353	0.000121435	1.72295e-07
ENSG00000238178	RP11-431J24.2		antisense	1.95682	2.08412	1.34213	3.49611	3.52333	3.28952	1.79436	3.43632	0.937397	0.000123404	2.49034e-10
ENSG00000141052	MYOCD	myocardin [Source:HGNC Symbol;Acc:16067]	protein_coding	0.320534	0.29103	0.267969	0.426367	0.546352	0.559817	0.293178	0.510845	0.801111	0.000123521	5.16629e-08
ENSG00000116016	EPAS1	endothelial PAS domain protein 1 [Source:HGNC Symbol;Acc:3374]	protein_coding	94.3205	92.8995	83.8977	74.7224	70.5946	70.4888	90.3725	71.9353	-0.329185	6.70583e-05	5.77801e-05
ENSG00000075702	WDR62	WD repeat domain 62 [Source:HGNC Symbol;Acc:24502]	protein_coding	2.25137	2.27159	2.3515	2.92519	3.00137	3.12845	2.29148	3.01834	0.397471	0.000126763	6.66132e-09
ENSG00000198142	SOWAHC	sosondowah ankyrin repeat domain family member C [Source:HGNC Symbol;Acc:26149]	protein_coding	3.45869	3.0665	3.15196	2.37872	1.98395	2.26663	3.22571	2.20977	-0.545724	0.000131298	3.16693e-07
ENSG00000135472	FAIM2	Fas apoptotic inhibitory molecule 2 [Source:HGNC Symbol;Acc:17067]	protein_coding	0.777137	0.868143	0.863386	0.529415	0.437424	0.471584	0.836222	0.479474	-0.802433	0.00013207	1.76818e-08
ENSG00000113368	LMNB1	lamin B1 [Source:HGNC Symbol;Acc:6637]	protein_coding	9.72958	8.98834	9.63661	10.8819	12.2221	12.6484	9.45151	11.9175	0.334462	0.000135391	2.06695e-07
ENSG00000235162	C12orf75	chromosome 12 open reading frame 75 [Source:HGNC Symbol;Acc:35164]	protein_coding	73.0343	70.5677	79.2164	84.7577	86.9091	87.648	74.2728	86.4383	0.218837	0.000125835	9.93319e-06
ENSG00000174804	FZD4	frizzled family receptor 4 [Source:HGNC Symbol;Acc:4042]	protein_coding	1.43021	1.37243	1.49183	1.97831	1.96052	1.78935	1.43149	1.90939	0.415598	0.00013573	1.72622e-07
ENSG00000136928	GABBR2	gamma-aminobutyric acid (GABA) B receptor, 2 [Source:HGNC Symbol;Acc:4507]	protein_coding	1.62545	1.42125	1.41042	2.07674	2.0939	1.88375	1.48571	2.01813	0.441867	0.000137969	7.86542e-07
ENSG00000104884	ERCC2	excision repair cross-complementing rodent repair deficiency, complementation group 2 [Source:HGNC Symbol;Acc:3434]	protein_coding	18.1011	17.5698	16.8797	21.7546	19.7867	20.6153	17.5169	20.7189	0.2422	0.000111904	2.80147e-05
ENSG00000099875	MKNK2	MAP kinase interacting serine/threonine kinase 2 [Source:HGNC Symbol;Acc:7111]	protein_coding	14.4621	13.8788	14.0738	11.3686	10.163	11.2159	14.1382	10.9159	-0.373174	0.000141089	1.72545e-06
ENSG00000167625	ZNF526	zinc finger protein 526 [Source:HGNC Symbol;Acc:29415]	protein_coding	2.5218	2.54921	2.48454	3.38938	3.45999	3.30435	2.51851	3.38457	0.426401	0.00014606	1.28428e-08
ENSG00000075218	GTSE1	G-2 and S-phase expressed 1 [Source:HGNC Symbol;Acc:13698]	protein_coding	4.36361	4.24803	4.88298	5.68656	5.424	5.95015	4.49821	5.6869	0.338293	0.000145561	1.01541e-06
ENSG00000222937	SNORD63	Small nucleolar RNA SNORD63 [Source:RFAM;Acc:RF00154]	snoRNA	21.8091	16.4587	19.6159	7.09309	5.57784	5.88541	19.2946	6.18544	-1.64125	0.000147404	1.99394e-09
ENSG00000124813	RUNX2	runt-related transcription factor 2 [Source:HGNC Symbol;Acc:10472]	protein_coding	3.22014	3.06381	3.038	2.43474	2.24673	2.15989	3.10732	2.28045	-0.44635	0.000147802	7.20742e-07
ENSG00000174099	MSRB3	methionine sulfoxide reductase B3 [Source:HGNC Symbol;Acc:27375]	protein_coding	21.8092	21.6292	21.7639	25.5932	25.7991	24.3635	21.7341	25.2519	0.216432	0.000143177	6.79612e-06
ENSG00000130479	MAP1S	microtubule-associated protein 1S [Source:HGNC Symbol;Acc:15715]	protein_coding	9.52663	9.08101	8.49557	11.2121	10.7022	11.0997	9.03441	11.0047	0.284618	0.00014543	4.66447e-06
ENSG00000154380	ENAH	enabled homolog (Drosophila) [Source:HGNC Symbol;Acc:18271]	protein_coding	22.2665	22.7678	21.7025	25.5725	26.2549	25.2833	22.2456	25.7036	0.208452	0.000139787	1.27142e-05
ENSG00000155816	FMN2	formin 2 [Source:HGNC Symbol;Acc:14074]	protein_coding	3.74847	3.85439	3.57511	4.78529	4.58288	4.29347	3.72599	4.55388	0.289472	0.000148079	7.9266e-06
ENSG00000141959	PFKL	phosphofructokinase, liver [Source:HGNC Symbol;Acc:8876]	protein_coding	12.9414	12.0733	12.1266	14.5601	13.7978	14.868	12.3805	14.4086	0.218865	0.000141169	1.60033e-05
ENSG00000188126	MYO15B	myosin XVB pseudogene [Source:HGNC Symbol;Acc:14083]	protein_coding	0.311249	0.226249	0.233076	0.114433	0.106798	0.125625	0.256858	0.115619	-1.15159	0.00016055	4.19643e-08
ENSG00000142867	BCL10	B-cell CLL/lymphoma 10 [Source:HGNC Symbol;Acc:989]	protein_coding	8.89524	8.57853	8.50174	6.4698	6.64801	6.48811	8.65851	6.53531	-0.405863	0.000160793	8.84661e-08
ENSG00000142556	ZNF614	zinc finger protein 614 [Source:HGNC Symbol;Acc:24722]	protein_coding	2.76698	2.55288	2.7851	1.91609	1.88594	1.88388	2.70165	1.8953	-0.511414	0.000163649	2.74953e-08
ENSG00000237649	KIFC1	kinesin family member C1 [Source:HGNC Symbol;Acc:6389]	protein_coding	7.93933	8.15144	8.23616	9.48749	10.0218	10.8958	8.10898	10.135	0.321755	0.000166518	4.26015e-07
ENSG00000180801	ARSJ	arylsulfatase family, member J [Source:HGNC Symbol;Acc:26286]	protein_coding	31.6529	30.3997	30.3783	38.0409	38.0312	34.3971	30.8103	36.8231	0.257197	0.000163621	4.00386e-06
ENSG00000079156	OSBPL6	oxysterol binding protein-like 6 [Source:HGNC Symbol;Acc:16388]	protein_coding	1.14494	1.12601	1.16089	0.713829	0.750382	0.817662	1.14395	0.760625	-0.588768	0.000167638	3.86998e-08
ENSG00000143013	LMO4	LIM domain only 4 [Source:HGNC Symbol;Acc:6644]	protein_coding	11.6763	11.5663	12.0281	8.0537	8.84953	9.55639	11.7569	8.81987	-0.414679	0.000167638	2.11506e-07
ENSG00000176208	ATAD5	ATPase family, AAA domain containing 5 [Source:HGNC Symbol;Acc:25752]	protein_coding	0.906973	0.90831	0.851743	1.30846	1.32848	1.22953	0.889009	1.28882	0.535784	0.000169664	2.74953e-08
ENSG00000073111	MCM2	minichromosome maintenance complex component 2 [Source:HGNC Symbol;Acc:6944]	protein_coding	6.5051	6.50643	5.85617	7.38169	7.74226	8.00579	6.28923	7.70991	0.293831	0.000166752	5.23135e-06
ENSG00000117543	DPH5	DPH5 homolog (S. cerevisiae) [Source:HGNC Symbol;Acc:24270]	protein_coding	8.75973	8.46451	9.77776	6.79157	6.72346	6.79695	9.00067	6.77066	-0.410735	0.000170449	2.00704e-06
ENSG00000204388	HSPA1B	heat shock 70kDa protein 1B [Source:HGNC Symbol;Acc:5233]	protein_coding	29.4952	29.5295	28.9602	22.6749	20.2529	23.7596	29.3283	22.2291	-0.399843	0.000172298	4.81996e-07
ENSG00000105220	GPI	glucose-6-phosphate isomerase [Source:HGNC Symbol;Acc:4458]	protein_coding	23.0888	23.1798	22.6679	26.8039	25.6697	26.9362	22.9789	26.4699	0.204048	0.0001645	9.13641e-06
ENSG00000231991	ANXA2P2	annexin A2 pseudogene 2 [Source:HGNC Symbol;Acc:539]	pseudogene	172.62	183.269	194.672	207.403	227.584	225.655	183.52	220.214	0.262969	0.000171816	2.81557e-06
ENSG00000182492	BGN	biglycan [Source:HGNC Symbol;Acc:1044]	protein_coding	84.0928	80.6421	80.1037	96.8312	93.5631	91.1918	81.6129	93.862	0.201745	0.000138288	3.79994e-05
ENSG00000188483	IER5L	immediate early response 5-like [Source:HGNC Symbol;Acc:23679]	protein_coding	2.66804	2.47815	2.24566	3.45567	3.25683	3.71481	2.46395	3.47577	0.496361	0.00017636	3.27109e-07
ENSG00000104332	SFRP1	secreted frizzled-related protein 1 [Source:HGNC Symbol;Acc:10776]	protein_coding	615.772	617.118	600.961	510.272	504.216	496.453	611.284	503.647	-0.27943	0.000160464	2.17487e-05
ENSG00000088970	PLK1S1	polo-like kinase 1 substrate 1 [Source:HGNC Symbol;Acc:15865]	lincRNA	3.39111	3.41428	3.29143	2.36953	2.47994	2.40221	3.36561	2.41723	-0.477513	0.000182669	4.86927e-08
ENSG00000119812	FAM98A	family with sequence similarity 98, member A [Source:HGNC Symbol;Acc:24520]	protein_coding	19.9846	20.4641	20.8316	23.6502	24.6324	23.3042	20.4268	23.8623	0.224271	0.000181422	3.96394e-06
ENSG00000131153	GINS2	GINS complex subunit 2 (Psf2 homolog) [Source:HGNC Symbol;Acc:24575]	protein_coding	3.91463	3.26026	3.81448	4.69799	4.82036	5.29165	3.66312	4.93667	0.430463	0.000184899	7.21661e-07
ENSG00000112245	PTP4A1	protein tyrosine phosphatase type IVA, member 1 [Source:HGNC Symbol;Acc:9634]	protein_coding	40.1642	38.9662	39.7061	32.9595	31.3446	32.2829	39.6122	32.1956	-0.299079	0.000180501	5.63717e-06
ENSG00000185070	FLRT2	fibronectin leucine rich transmembrane protein 2 [Source:HGNC Symbol;Acc:3761]	protein_coding	2.53684	2.25425	2.21361	1.67024	1.76095	1.75196	2.3349	1.72772	-0.434494	0.000185652	2.29082e-06
ENSG00000187678	SPRY4	sprouty homolog 4 (Drosophila) [Source:HGNC Symbol;Acc:15533]	protein_coding	15.5216	14.7457	15.0855	12.5699	11.6777	11.5372	15.1176	11.9283	-0.341844	0.000184355	4.35095e-06
ENSG00000196547	MAN2A2	mannosidase, alpha, class 2A, member 2 [Source:HGNC Symbol;Acc:6825]	protein_coding	5.23086	5.06236	4.77574	6.46996	6.19853	5.72536	5.02298	6.13128	0.287645	0.000184355	9.74798e-06
ENSG00000137040	RANBP6	RAN binding protein 6 [Source:HGNC Symbol;Acc:9851]	protein_coding	8.35434	8.16645	8.09548	9.95528	10.2878	9.41716	8.20542	9.88675	0.268918	0.000191075	3.38946e-06
ENSG00000111913	FAM65B	family with sequence similarity 65, member B [Source:HGNC Symbol;Acc:13872]	protein_coding	2.74372	2.6444	2.56967	1.84116	2.00736	2.0375	2.6526	1.96201	-0.435076	0.000194826	4.83966e-07
ENSG00000110092	CCND1	cyclin D1 [Source:HGNC Symbol;Acc:1582]	protein_coding	313.538	308.581	285.438	353.125	352.536	341.536	302.519	349.065	0.206472	0.000114278	8.16966e-05
ENSG00000179833	SERTAD2	SERTA domain containing 2 [Source:HGNC Symbol;Acc:30784]	protein_coding	7.1823	6.85628	6.62366	8.61019	8.12103	8.02709	6.88741	8.25277	0.260917	0.000186725	1.09382e-05
ENSG00000154265	ABCA5	ATP-binding cassette, sub-family A (ABC1), member 5 [Source:HGNC Symbol;Acc:35]	protein_coding	0.675472	0.476065	0.589293	0.353266	0.330384	0.301912	0.580277	0.328521	-0.820755	0.000197613	5.40794e-07
ENSG00000009694	ODZ1	odz, odd Oz/ten-m homolog 1 (Drosophila) [Source:HGNC Symbol;Acc:8117]	protein_coding	0.157841	0.130572	0.115538	0.245447	0.257352	0.238532	0.13465	0.247111	0.875942	0.000201641	1.14406e-08
ENSG00000123643	SLC36A1	solute carrier family 36 (proton/amino acid symporter), member 1 [Source:HGNC Symbol;Acc:18761]	protein_coding	5.09329	5.00735	4.36364	6.30622	5.75981	5.85535	4.82143	5.9738	0.309189	0.000177413	2.44839e-05
ENSG00000164619	BMPER	BMP binding endothelial regulator [Source:HGNC Symbol;Acc:24154]	protein_coding	1.61482	1.7507	1.73138	2.27292	2.34896	2.20599	1.69897	2.27596	0.421815	0.000204653	6.93541e-08
ENSG00000162063	CCNF	cyclin F [Source:HGNC Symbol;Acc:1591]	protein_coding	1.63839	1.67162	1.64391	2.10849	2.22795	2.28986	1.6513	2.20877	0.419637	0.000206092	1.88125e-08
ENSG00000105486	LIG1	ligase I, DNA, ATP-dependent [Source:HGNC Symbol;Acc:6598]	protein_coding	5.43195	5.13669	5.42747	6.37278	6.86616	6.71605	5.33204	6.65166	0.319028	0.000206092	9.56809e-08
ENSG00000031698	SARS	seryl-tRNA synthetase [Source:HGNC Symbol;Acc:10537]	protein_coding	62.8387	64.3654	67.1813	51.0355	53.8736	54.5796	64.7951	53.1629	-0.285466	0.000166486	4.11924e-05
ENSG00000102144	PGK1	phosphoglycerate kinase 1 [Source:HGNC Symbol;Acc:8896]	protein_coding	61.5931	63.7059	68.3407	71.778	76.6089	76.1686	64.5466	74.8518	0.213697	0.000180687	2.7143e-05
ENSG00000196233	LCOR	ligand dependent nuclear receptor corepressor [Source:HGNC Symbol;Acc:29503]	protein_coding	3.47955	3.17348	3.06755	2.50884	2.55476	2.39494	3.24019	2.48618	-0.38215	0.000196191	1.27954e-05
ENSG00000166922	SCG5	secretogranin V (7B2 protein) [Source:HGNC Symbol;Acc:10816]	protein_coding	4.7301	4.59561	4.95806	3.46376	3.06629	2.85678	4.76126	3.12894	-0.605667	0.000209783	1.06394e-07
ENSG00000033100	CHPF2	chondroitin polymerizing factor 2 [Source:HGNC Symbol;Acc:29270]	protein_coding	46.526	43.5874	42.7169	52.8632	49.4104	50.7911	44.2767	51.0215	0.204557	0.000116321	9.79122e-05
ENSG00000153904	DDAH1	dimethylarginine dimethylaminohydrolase 1 [Source:HGNC Symbol;Acc:2715]	protein_coding	27.3908	25.7301	27.0975	31.0002	31.2964	30.1988	26.7395	30.8318	0.205448	0.00020916	9.28056e-06
ENSG00000154864	PIEZO2	piezo-type mechanosensitive ion channel component 2 [Source:HGNC Symbol;Acc:26270]	protein_coding	5.47619	5.84031	4.8417	4.09214	4.14653	4.01977	5.38607	4.08615	-0.39849	0.00019307	2.58217e-05
ENSG00000075426	FOSL2	FOS-like antigen 2 [Source:HGNC Symbol;Acc:3798]	protein_coding	18.1444	18.017	16.6017	14.0282	12.9529	14.6057	17.5877	13.8622	-0.343406	0.000194797	2.42926e-05
ENSG00000156515	HK1	hexokinase 1 [Source:HGNC Symbol;Acc:4922]	protein_coding	26.9047	28.9088	27.0973	32.3139	31.3674	32.267	27.6369	31.9828	0.210698	0.000184358	3.51284e-05
ENSG00000075643	MOCOS	molybdenum cofactor sulfurase [Source:HGNC Symbol;Acc:18234]	protein_coding	3.32505	3.0884	3.07329	2.27704	2.36334	2.32295	3.16225	2.32111	-0.446136	0.000220028	1.60117e-07
ENSG00000153071	DAB2	disabled homolog 2, mitogen-responsive phosphoprotein (Drosophila) [Source:HGNC Symbol;Acc:2662]	protein_coding	63.8942	65.2519	62.0549	72.1297	74.2857	72.4371	63.7337	72.9508	0.194868	0.000196191	2.46955e-05
ENSG00000177058	SLC38A9	solute carrier family 38, member 9 [Source:HGNC Symbol;Acc:26907]	protein_coding	1.72308	1.72098	1.81457	1.16302	1.28019	1.35412	1.75288	1.26578	-0.469702	0.000223069	7.22442e-07
ENSG00000131236	CAP1	CAP, adenylate cyclase-associated protein 1 (yeast) [Source:HGNC Symbol;Acc:20040]	protein_coding	138.552	143.578	143.671	159.083	166.355	162.257	141.934	162.565	0.1958	0.000212885	1.12542e-05
ENSG00000140525	FANCI	Fanconi anemia, complementation group I [Source:HGNC Symbol;Acc:25568]	protein_coding	4.29851	4.37662	4.12526	5.05687	5.636	5.12609	4.2668	5.27299	0.305467	0.000225396	1.48901e-06
ENSG00000134690	CDCA8	cell division cycle associated 8 [Source:HGNC Symbol;Acc:14629]	protein_coding	8.41174	8.18397	9.54909	10.2226	11.2054	11.6691	8.71493	11.0324	0.34018	0.000227406	3.67076e-06
ENSG00000104549	SQLE	squalene epoxidase [Source:HGNC Symbol;Acc:11279]	protein_coding	19.0312	18.8501	19.4497	15.3155	15.0945	15.4903	19.1103	15.3001	-0.320814	0.000231107	1.0943e-06
ENSG00000160828	AC004166.7		pseudogene	3.31829	2.98996	3.01773	4.33842	4.13746	4.06504	3.10866	4.18031	0.427317	0.000238048	1.87373e-07
ENSG00000150991	UBC	ubiquitin C [Source:HGNC Symbol;Acc:12468]	protein_coding	251.616	247.304	289.064	199.197	216.746	212.598	262.661	209.514	-0.32616	0.000123521	0.000115041
ENSG00000183010	PYCR1	pyrroline-5-carboxylate reductase 1 [Source:HGNC Symbol;Acc:9721]	protein_coding	38.6678	39.0514	40.426	32.8742	31.1319	31.0806	39.3817	31.6956	-0.313244	0.000229602	9.98676e-06
ENSG00000135919	SERPINE2	serpin peptidase inhibitor, clade E (nexin, plasminogen activator inhibitor type 1), member 2 [Source:HGNC Symbol;Acc:8951]	protein_coding	12.395	12.0743	12.6936	14.1567	14.4826	14.5775	12.3876	14.4056	0.217726	0.000243564	1.12192e-06
ENSG00000256663	RP11-424C20.2		pseudogene	5.43119	5.02388	4.88632	7.00752	7.0164	7.25715	5.1138	7.09369	0.472142	0.000246039	3.41704e-08
ENSG00000123572	NRK	Nik related kinase [Source:HGNC Symbol;Acc:25391]	protein_coding	1.31863	1.49695	1.16295	1.84742	1.89749	1.80052	1.32618	1.84848	0.479065	0.000248598	4.94479e-07
ENSG00000132122	SPATA6	spermatogenesis associated 6 [Source:HGNC Symbol;Acc:18309]	protein_coding	2.04095	2.04857	1.92013	1.41323	1.39999	1.32659	2.00322	1.37994	-0.537715	0.000249785	1.10902e-07
ENSG00000185559	DLK1	delta-like 1 homolog (Drosophila) [Source:HGNC Symbol;Acc:2907]	protein_coding	0.166663	0.116101	0.204124	0.514946	0.548041	0.455755	0.162296	0.506247	1.64121	0.000249905	4.16907e-09
ENSG00000185495	RP11-504P24.4		processed_transcript	1.93227	1.88645	2.11179	1.19267	1.10073	1.07181	1.97684	1.12174	-0.81746	0.000256408	1.56438e-08
ENSG00000111860	CEP85L	centrosomal protein 85kDa-like [Source:HGNC Symbol;Acc:21638]	protein_coding	1.8857	1.85765	1.87728	1.31406	1.41775	1.37878	1.87354	1.37019	-0.451392	0.000256408	9.50235e-08
ENSG00000113594	LIFR	leukemia inhibitory factor receptor alpha [Source:HGNC Symbol;Acc:6597]	protein_coding	5.98888	6.1951	5.61945	4.83549	4.67563	4.57445	5.93448	4.69519	-0.337937	0.000227406	3.44121e-05
ENSG00000072163	LIMS2	LIM and senescent cell antigen-like domains 2 [Source:HGNC Symbol;Acc:16084]	protein_coding	4.21932	4.05537	4.15928	5.1953	4.78242	4.94374	4.14466	4.97382	0.263102	0.000257689	4.50457e-06
ENSG00000196781	TLE1	transducin-like enhancer of split 1 (E(sp1) homolog, Drosophila) [Source:HGNC Symbol;Acc:11837]	protein_coding	7.371	6.54532	6.81848	5.1615	5.38342	5.43035	6.9116	5.32509	-0.376214	0.000262951	4.36698e-06
ENSG00000134057	CCNB1	cyclin B1 [Source:HGNC Symbol;Acc:1579]	protein_coding	24.668	24.1365	25.4006	27.7001	29.8844	30.2354	24.735	29.2733	0.243029	0.000266445	2.65969e-06
ENSG00000164402	SEPT8	septin 8 [Source:HGNC Symbol;Acc:16511]	protein_coding	16.6762	16.7274	16.1599	18.9487	19.53	18.891	16.5212	19.1233	0.211013	0.000262351	7.77373e-06
ENSG00000173692	PSMD1	proteasome (prosome, macropain) 26S subunit, non-ATPase, 1 [Source:HGNC Symbol;Acc:9554]	protein_coding	33.8653	34.9513	35.8933	39.0639	41.0383	40.8446	34.9033	40.3156	0.207973	0.000262951	7.22785e-06
ENSG00000161800	RACGAP1	Rac GTPase activating protein 1 [Source:HGNC Symbol;Acc:9804]	protein_coding	9.7915	9.7907	10.429	11.335	12.5658	13.1066	10.0037	12.3358	0.302315	0.000274136	7.20239e-07
ENSG00000124201	ZNFX1	zinc finger, NFX1-type containing 1 [Source:HGNC Symbol;Acc:29271]	protein_coding	7.58195	7.7818	6.85568	9.04171	8.76959	8.77378	7.40648	8.86169	0.258795	0.000256408	1.88587e-05
ENSG00000197635	DPP4	dipeptidyl-peptidase 4 [Source:HGNC Symbol;Acc:3009]	protein_coding	22.1282	24.027	22.8636	18.8172	19.0419	17.7052	23.0062	18.5214	-0.312829	0.00019003	9.66802e-05
ENSG00000005884	ITGA3	integrin, alpha 3 (antigen CD49C, alpha 3 subunit of VLA-3 receptor) [Source:HGNC Symbol;Acc:6139]	protein_coding	52.1984	51.9402	48.8378	60.9835	57.815	56.8758	50.9921	58.5581	0.199594	0.000112939	0.000176967
ENSG00000171456	ASXL1	additional sex combs like 1 (Drosophila) [Source:HGNC Symbol;Acc:18318]	protein_coding	10.4869	10.441	9.97638	11.9492	11.8613	12.0633	10.3014	11.9579	0.215126	0.000284597	6.67849e-06
ENSG00000074410	CA12	carbonic anhydrase XII [Source:HGNC Symbol;Acc:1371]	protein_coding	4.26211	4.52026	4.35053	3.23916	3.50856	3.3801	4.37763	3.37594	-0.374861	0.000291366	3.73708e-06
ENSG00000104408	EIF3E	eukaryotic translation initiation factor 3, subunit E [Source:HGNC Symbol;Acc:3277]	protein_coding	42.35	41.8448	45.6351	34.7547	35.478	36.4846	43.2766	35.5725	-0.282827	0.000240575	5.55689e-05
ENSG00000108465	CDK5RAP3	CDK5 regulatory subunit associated protein 3 [Source:HGNC Symbol;Acc:18673]	protein_coding	51.1577	48.5992	54.6412	42.4437	39.7899	42.1116	51.466	41.4484	-0.312305	0.000252414	4.73565e-05
ENSG00000106733	NMRK1	nicotinamide riboside kinase 1 [Source:HGNC Symbol;Acc:26057]	protein_coding	5.45579	5.03692	5.53313	3.99311	4.0553	3.816	5.34195	3.9548	-0.43376	0.000305009	5.14672e-07
ENSG00000102158	MAGT1	magnesium transporter 1 [Source:HGNC Symbol;Acc:28880]	protein_coding	31.2816	30.483	33.121	25.9687	26.3577	24.9063	31.6285	25.7442	-0.296979	0.000273413	4.75664e-05
ENSG00000119523	ALG2	asparagine-linked glycosylation 2, alpha-1,3-mannosyltransferase homolog (S. cerevisiae) [Source:HGNC Symbol;Acc:23159]	protein_coding	14.6644	15.0482	15.4311	11.6909	11.3803	12.3594	15.0479	11.8102	-0.349532	0.000319072	3.53169e-06
ENSG00000187840	EIF4EBP1	eukaryotic translation initiation factor 4E binding protein 1 [Source:HGNC Symbol;Acc:3288]	protein_coding	45.7955	40.664	46.7771	30.0586	33.1915	36.2193	44.4122	33.1565	-0.421664	0.000325788	3.96453e-06
ENSG00000100280	AP1B1	adaptor-related protein complex 1, beta 1 subunit [Source:HGNC Symbol;Acc:554]	protein_coding	15.9994	15.6431	15.6183	18.198	17.839	18.6997	15.7536	18.2456	0.211863	0.000327417	3.7206e-06
ENSG00000160957	RECQL4	RecQ protein-like 4 [Source:HGNC Symbol;Acc:9949]	processed_transcript	3.66115	3.12937	3.60376	4.27107	4.26085	4.7715	3.46476	4.43448	0.356007	0.000334213	4.94121e-06
ENSG00000170027	YWHAG	tyrosine 3-monooxygenase/tryptophan 5-monooxygenase activation protein, gamma polypeptide [Source:HGNC Symbol;Acc:12852]	protein_coding	63.8475	64.4386	64.687	73.472	73.2641	74.0498	64.3244	73.5953	0.194248	0.000346224	5.47029e-06
ENSG00000172403	SYNPO2	synaptopodin 2 [Source:HGNC Symbol;Acc:17732]	protein_coding	5.59486	6.35754	4.9621	8.83726	9.84642	7.75546	5.63816	8.81305	0.644415	0.000364303	6.58372e-11
ENSG00000082458	DLG3	discs, large homolog 3 (Drosophila) [Source:HGNC Symbol;Acc:2902]	protein_coding	4.04406	4.28369	4.2625	3.10283	3.20827	3.44673	4.19675	3.25261	-0.367674	0.00035848	7.5211e-06
ENSG00000090339	ICAM1	intercellular adhesion molecule 1 [Source:HGNC Symbol;Acc:5344]	protein_coding	26.9254	26.3469	26.7311	34.9647	30.5011	31.1459	26.6678	32.2039	0.272137	0.000361491	7.03602e-06
ENSG00000103522	IL21R	interleukin 21 receptor [Source:HGNC Symbol;Acc:6006]	protein_coding	0.301539	0.238066	0.242364	0.0539393	0.0793246	0.110668	0.260657	0.0813107	-1.68063	0.000373726	4.49314e-08
ENSG00000125266	EFNB2	ephrin-B2 [Source:HGNC Symbol;Acc:3227]	protein_coding	5.29962	5.18151	5.53165	6.62003	6.32164	6.70727	5.33759	6.54965	0.295228	0.000381603	6.03212e-07
ENSG00000148840	PPRC1	peroxisome proliferator-activated receptor gamma, coactivator-related 1 [Source:HGNC Symbol;Acc:30025]	protein_coding	12.1849	11.9668	10.8694	14.3002	13.03	14.0253	11.6737	13.7852	0.239851	0.000266116	0.000119251
ENSG00000103064	SLC7A6	solute carrier family 7 (amino acid transporter light chain, y+L system), member 6 [Source:HGNC Symbol;Acc:11064]	protein_coding	3.8065	3.719	3.56603	4.73887	4.27364	4.38645	3.69718	4.46632	0.272664	0.00035848	2.98869e-05
ENSG00000066027	PPP2R5A	protein phosphatase 2, regulatory subunit B', alpha [Source:HGNC Symbol;Acc:9309]	protein_coding	9.29529	8.91667	9.52161	6.74789	7.50836	7.39421	9.24452	7.21682	-0.357236	0.000380172	9.6775e-06
ENSG00000137285	TUBB2B	tubulin, beta 2B class IIb [Source:HGNC Symbol;Acc:30829]	protein_coding	18.0403	16.2667	17.2171	19.8404	20.3776	22.6095	17.1747	20.9425	0.286149	0.000385195	4.78315e-06
ENSG00000108828	VAT1	vesicle amine transport protein 1 homolog (T. californica) [Source:HGNC Symbol;Acc:16919]	protein_coding	139.325	141.875	141.663	118.297	113.737	116.496	140.955	116.177	-0.278909	0.000366352	2.66127e-05
ENSG00000064703	DDX20	DEAD (Asp-Glu-Ala-Asp) box polypeptide 20 [Source:HGNC Symbol;Acc:2743]	protein_coding	2.96437	2.80738	2.94628	3.51964	4.01727	3.61853	2.90601	3.71848	0.355674	0.000402005	5.4315e-07
ENSG00000188290	HES4	hairy and enhancer of split 4 (Drosophila) [Source:HGNC Symbol;Acc:24149]	protein_coding	5.49047	3.75211	4.02428	2.73868	2.295	2.18641	4.42229	2.4067	-0.877738	0.00039931	3.57394e-06
ENSG00000082512	TRAF5	TNF receptor-associated factor 5 [Source:HGNC Symbol;Acc:12035]	protein_coding	4.15628	3.8441	3.85348	4.80859	4.70487	4.6577	3.95129	4.72372	0.257602	0.00039959	5.66755e-06
ENSG00000113070	HBEGF	heparin-binding EGF-like growth factor [Source:HGNC Symbol;Acc:3059]	protein_coding	7.8511	7.28253	8.267	6.00492	5.92345	5.65139	7.80021	5.85992	-0.412632	0.000405231	2.83346e-06
ENSG00000102409	BEX4	brain expressed, X-linked 4 [Source:HGNC Symbol;Acc:25475]	protein_coding	12.31	11.078	13.3977	8.64603	9.1354	8.97584	12.2619	8.91909	-0.459212	0.000403338	6.18782e-06
ENSG00000100401	RANGAP1	Ran GTPase activating protein 1 [Source:HGNC Symbol;Acc:9854]	protein_coding	43.2253	40.7736	41.7187	47.9133	46.0054	49.5175	41.9059	47.812	0.190222	0.000365095	4.73783e-05
ENSG00000198763	MT-ND2	mitochondrially encoded NADH dehydrogenase 2 [Source:HGNC Symbol;Acc:7456]	protein_coding	976.825	1008.37	1081.1	836.362	723.005	824.748	1022.1	794.705	-0.363045	0.000396284	1.73496e-05
ENSG00000077942	FBLN1	fibulin 1 [Source:HGNC Symbol;Acc:3600]	protein_coding	49.3296	46.8371	48.5024	40.179	37.8357	41.0169	48.223	39.6772	-0.281412	0.000357678	6.18251e-05
ENSG00000106333	PCOLCE	procollagen C-endopeptidase enhancer [Source:HGNC Symbol;Acc:8738]	protein_coding	86.9861	82.3341	88.8947	71.53	68.1596	72.6911	86.0717	70.7936	-0.28192	0.000360996	5.96115e-05
ENSG00000073921	PICALM	phosphatidylinositol binding clathrin assembly protein [Source:HGNC Symbol;Acc:15514]	protein_coding	42.4773	42.0955	42.1664	48.2511	49.5012	46.9892	42.2464	48.2472	0.191615	0.000396284	2.639e-05
ENSG00000128805	ARHGAP22	Rho GTPase activating protein 22 [Source:HGNC Symbol;Acc:30320]	protein_coding	8.78443	8.53366	8.27586	10.4127	9.72115	9.80005	8.53131	9.97796	0.225977	0.000380831	4.60525e-05
ENSG00000173210	ABLIM3	actin binding LIM protein family, member 3 [Source:HGNC Symbol;Acc:29132]	protein_coding	12.3573	11.9319	11.6909	9.6308	9.91299	9.47326	11.9934	9.67235	-0.310299	0.00041372	1.49545e-05
ENSG00000230606	AC159540.1		lincRNA	6.05249	4.851	6.3488	3.86078	3.71514	4.39208	5.75077	3.98933	-0.527608	0.000416936	2.0801e-05
ENSG00000138376	BARD1	BRCA1 associated RING domain 1 [Source:HGNC Symbol;Acc:952]	protein_coding	1.15425	1.14033	1.31088	1.65178	1.67004	1.63559	1.20182	1.65247	0.459404	0.000438857	1.76034e-07
ENSG00000104356	POP1	processing of precursor 1, ribonuclease P/MRP subunit (S. cerevisiae) [Source:HGNC Symbol;Acc:30129]	protein_coding	5.61764	6.15544	5.87677	6.95433	6.88608	7.64181	5.88328	7.16074	0.283488	0.000427946	1.39052e-05
ENSG00000095319	NUP188	nucleoporin 188kDa [Source:HGNC Symbol;Acc:17859]	protein_coding	10.5766	10.6789	9.84971	12.1739	11.8936	12.0267	10.3684	12.0314	0.214612	0.000398307	4.67405e-05
ENSG00000111424	VDR	vitamin D (1,25- dihydroxyvitamin D3) receptor [Source:HGNC Symbol;Acc:12679]	protein_coding	3.27354	3.5664	3.32108	4.43735	3.90272	4.24031	3.38701	4.19346	0.30813	0.000426872	3.01752e-05
ENSG00000171241	SHCBP1	SHC SH2-domain binding protein 1 [Source:HGNC Symbol;Acc:29547]	protein_coding	7.63203	7.58572	8.36687	9.03338	9.7509	9.64578	7.86154	9.47669	0.269572	0.000452765	5.50506e-06
ENSG00000169519	METTL15	methyltransferase like 15 [Source:HGNC Symbol;Acc:26606]	protein_coding	4.44771	4.23323	4.34589	3.31447	3.3676	3.14159	4.34228	3.27456	-0.407152	0.000463173	7.03447e-07
ENSG00000111011	RSRC2	arginine/serine-rich coiled-coil 2 [Source:HGNC Symbol;Acc:30559]	protein_coding	11.0126	10.8782	11.4977	8.74548	9.18122	9.10019	11.1295	9.00896	-0.304959	0.00045844	1.00986e-05
ENSG00000223559	RP11-700P18.1		pseudogene	2.76804	2.76565	2.65409	1.62837	1.90505	1.91419	2.72926	1.81587	-0.587849	0.000481168	6.66753e-07
ENSG00000152953	STK32B	serine/threonine kinase 32B [Source:HGNC Symbol;Acc:14217]	protein_coding	6.57125	6.54746	6.78799	7.88047	7.91521	8.06314	6.63557	7.95294	0.261268	0.000485094	6.52549e-07
ENSG00000132467	UTP3	UTP3, small subunit (SSU) processome component, homolog (S. cerevisiae) [Source:HGNC Symbol;Acc:24477]	protein_coding	19.5864	21.1009	22.4754	25.4209	25.0357	25.4769	21.0542	25.3112	0.265663	0.00048013	7.92275e-06
ENSG00000136542	GALNT5	UDP-N-acetyl-alpha-D-galactosamine:polypeptide N-acetylgalactosaminyltransferase 5 (GalNAc-T5) [Source:HGNC Symbol;Acc:4127]	protein_coding	101.344	109.577	97.874	125.473	133.2	119.75	102.932	126.141	0.293352	0.000486314	2.27044e-06
ENSG00000103196	CRISPLD2	cysteine-rich secretory protein LCCL domain containing 2 [Source:HGNC Symbol;Acc:25248]	protein_coding	6.08299	6.12119	5.84818	7.56029	6.95567	6.89476	6.01745	7.13691	0.246145	0.000450547	4.05346e-05
ENSG00000179476	C14orf28	chromosome 14 open reading frame 28 [Source:HGNC Symbol;Acc:19834]	protein_coding	1.95076	1.88838	2.16241	1.27963	1.23423	1.44292	2.00052	1.31892	-0.601012	0.000498906	7.81647e-07
ENSG00000117226	GBP3	guanylate binding protein 3 [Source:HGNC Symbol;Acc:4184]	protein_coding	19.0888	19.5521	19.853	21.9063	23.5017	22.7417	19.498	22.7166	0.22042	0.000498906	6.74122e-06
ENSG00000123983	ACSL3	acyl-CoA synthetase long-chain family member 3 [Source:HGNC Symbol;Acc:3570]	protein_coding	26.485	26.5014	26.5157	21.414	22.0494	21.9987	26.5007	21.8207	-0.280333	0.000498906	1.47425e-05
ENSG00000137124	ALDH1B1	aldehyde dehydrogenase 1 family, member B1 [Source:HGNC Symbol;Acc:407]	protein_coding	15.0311	14.8284	14.8268	18.0431	16.9737	17.6652	14.8954	17.5606	0.237477	0.000507818	7.43776e-06
ENSG00000113758	DBN1	drebrin 1 [Source:HGNC Symbol;Acc:2695]	protein_coding	62.0875	60.4791	62.2886	69.8685	68.7178	71.6167	61.6184	70.0677	0.185389	0.000507818	1.23896e-05
ENSG00000147536	GINS4	GINS complex subunit 4 (Sld5 homolog) [Source:HGNC Symbol;Acc:28226]	protein_coding	3.0614	3.13488	3.02558	3.68419	3.9376	4.00315	3.07395	3.87498	0.334095	0.000521614	3.51514e-07
ENSG00000175471	MCTP1	multiple C2 domains, transmembrane 1 [Source:HGNC Symbol;Acc:26183]	protein_coding	0.345214	0.328044	0.256124	0.177914	0.162999	0.119245	0.309794	0.153386	-1.01414	0.000524134	2.51733e-07
ENSG00000132359	RAP1GAP2	RAP1 GTPase activating protein 2 [Source:HGNC Symbol;Acc:29176]	protein_coding	2.05763	1.94222	1.96464	2.63648	2.5076	2.45711	1.98816	2.53373	0.349829	0.00052447	8.81578e-07
ENSG00000074181	NOTCH3	notch 3 [Source:HGNC Symbol;Acc:7883]	protein_coding	13.5417	12.7097	11.3748	15.5174	14.4561	14.8149	12.5421	14.9295	0.251389	0.000341273	0.000185072
ENSG00000146858	ZC3HAV1L	zinc finger CCCH-type, antiviral 1-like [Source:HGNC Symbol;Acc:22423]	protein_coding	2.4831	2.37181	2.21622	4.23844	3.38191	3.28488	2.35704	3.63508	0.625008	0.000524224	2.43198e-06
ENSG00000134874	DZIP1	DAZ interacting protein 1 [Source:HGNC Symbol;Acc:20908]	protein_coding	9.33979	9.24014	9.09332	7.64356	7.38641	7.1898	9.22442	7.40659	-0.316649	0.000512862	1.74932e-05
ENSG00000182858	ALG12	asparagine-linked glycosylation 12, alpha-1,6-mannosyltransferase homolog (S. cerevisiae) [Source:HGNC Symbol;Acc:19358]	protein_coding	13.0454	12.0293	12.7012	9.50253	7.92952	9.70593	12.592	9.04599	-0.477152	0.000530138	6.40195e-07
ENSG00000115091	ACTR3	ARP3 actin-related protein 3 homolog (yeast) [Source:HGNC Symbol;Acc:170]	protein_coding	31.4604	31.3454	33.2682	35.6346	36.9587	36.8133	32.0247	36.4689	0.187482	0.000515679	2.18227e-05
ENSG00000128245	YWHAH	tyrosine 3-monooxygenase/tryptophan 5-monooxygenase activation protein, eta polypeptide [Source:HGNC Symbol;Acc:12853]	protein_coding	35.7456	35.1301	37.4804	40.0039	42.5533	43.0922	36.1187	41.8831	0.213623	0.000530044	1.03065e-05
ENSG00000074800	ENO1	enolase 1, (alpha) [Source:HGNC Symbol;Acc:3350]	protein_coding	383.017	384.31	400.848	436.774	435.629	449.01	389.392	440.471	0.177824	0.000518497	2.20381e-05
ENSG00000061918	GUCY1B3	guanylate cyclase 1, soluble, beta 3 [Source:HGNC Symbol;Acc:4687]	protein_coding	1.6654	1.40408	1.41997	0.861081	1.04847	0.833397	1.49648	0.914315	-0.710813	0.000540496	1.6771e-06
ENSG00000076382	SPAG5	sperm associated antigen 5 [Source:HGNC Symbol;Acc:13452]	protein_coding	8.48077	8.95634	8.676	10.0099	11.3872	10.6407	8.70437	10.6793	0.295001	0.000549528	3.00124e-06
ENSG00000120889	TNFRSF10B	tumor necrosis factor receptor superfamily, member 10b [Source:HGNC Symbol;Acc:11905]	protein_coding	43.4527	44.3978	43.534	35.1314	36.5782	36.922	43.7948	36.2106	-0.27435	0.000531211	4.79247e-05
ENSG00000114861	FOXP1	forkhead box P1 [Source:HGNC Symbol;Acc:3823]	protein_coding	4.70681	4.89811	4.45478	3.82357	3.70562	3.68629	4.68657	3.73849	-0.326075	0.000519328	6.60666e-05
ENSG00000127561	SYNGR3	synaptogyrin 3 [Source:HGNC Symbol;Acc:11501]	protein_coding	2.40861	2.28901	2.34064	1.40341	1.47601	1.75874	2.34609	1.54605	-0.601669	0.000592742	7.14953e-07
ENSG00000203875	SNHG5	small nucleolar RNA host gene 5 (non-protein coding) [Source:HGNC Symbol;Acc:21026]	lincRNA	118.103	113.239	128.381	97.3434	89.1421	99.969	119.908	95.4848	-0.328582	0.000542025	5.39005e-05
ENSG00000105373	GLTSCR2	glioma tumor suppressor candidate region gene 2 [Source:HGNC Symbol;Acc:4333]	protein_coding	82.2915	78.5502	82.3094	66.9987	62.2835	68.7172	81.0504	65.9998	-0.296357	0.000540496	5.83169e-05
ENSG00000111206	FOXM1	forkhead box M1 [Source:HGNC Symbol;Acc:3818]	protein_coding	9.14124	8.79939	8.56182	10.2879	10.6975	10.4372	8.83415	10.4742	0.245676	0.000594228	5.50506e-06
ENSG00000104980	TIMM44	translocase of inner mitochondrial membrane 44 homolog (yeast) [Source:HGNC Symbol;Acc:17316]	protein_coding	17.8674	17.4085	18.9117	14.2406	13.2959	14.7012	18.0625	14.0792	-0.359432	0.000595066	1.10982e-05
ENSG00000261326	RP5-1057J7.6		lincRNA	0.777011	0.553491	0.692279	1.02985	1.00922	1.12	0.67426	1.05302	0.643157	0.000619801	2.66985e-07
ENSG00000185963	BICD2	bicaudal D homolog 2 (Drosophila) [Source:HGNC Symbol;Acc:17208]	protein_coding	10.6049	10.8016	9.75053	12.0678	12.2935	12.2562	10.3857	12.2058	0.232972	0.000592812	3.05681e-05
ENSG00000114331	ACAP2	ArfGAP with coiled-coil, ankyrin repeat and PH domains 2 [Source:HGNC Symbol;Acc:16469]	protein_coding	8.56219	8.67215	8.68447	6.98935	7.15843	6.92328	8.6396	7.02369	-0.298737	0.000617432	1.12163e-05
ENSG00000214391	RP11-121L10.3		pseudogene	76.3869	73.203	70.1854	82.8938	103.119	84.1325	73.2584	90.0485	0.297707	0.000433999	0.000201928
ENSG00000171132	PRKCE	protein kinase C, epsilon [Source:HGNC Symbol;Acc:9401]	protein_coding	1.85539	1.83664	1.76329	1.3426	1.35393	1.34443	1.81844	1.34699	-0.432966	0.000682275	4.86035e-07
ENSG00000129657	SEC14L1	SEC14-like 1 (S. cerevisiae) [Source:HGNC Symbol;Acc:10698]	protein_coding	10.063	10.1713	9.53031	11.2147	11.582	11.6305	9.92154	11.4757	0.209952	0.000656664	2.77932e-05
ENSG00000130202	PVRL2	poliovirus receptor-related 2 (herpesvirus entry mediator B) [Source:HGNC Symbol;Acc:9707]	protein_coding	41.9675	39.6335	40.0218	46.1229	44.5962	48.4522	40.5409	46.3905	0.194449	0.000618911	6.57224e-05
ENSG00000152457	DCLRE1C	DNA cross-link repair 1C [Source:HGNC Symbol;Acc:17642]	protein_coding	1.71059	1.71418	1.74324	1.22594	1.2061	1.25167	1.72267	1.2279	-0.488448	0.000718116	1.87496e-07
ENSG00000166106	ADAMTS15	ADAM metallopeptidase with thrombospondin type 1 motif, 15 [Source:HGNC Symbol;Acc:16305]	protein_coding	1.80091	1.57373	1.68004	1.1021	1.08723	1.28872	1.68489	1.15935	-0.539339	0.000726858	4.5618e-06
ENSG00000102531	FNDC3A	fibronectin type III domain containing 3A [Source:HGNC Symbol;Acc:20296]	protein_coding	18.8831	18.6313	17.8554	15.0722	14.8387	15.4936	18.4566	15.1348	-0.286267	0.000683029	5.03793e-05
ENSG00000114554	PLXNA1	plexin A1 [Source:HGNC Symbol;Acc:9099]	protein_coding	18.518	17.8208	15.6594	21.0908	19.9358	20.2551	17.3327	20.4272	0.236994	0.000376826	0.000357568
ENSG00000148296	SURF6	surfeit 6 [Source:HGNC Symbol;Acc:11478]	protein_coding	10.6056	10.192	10.0468	12.4484	11.9288	12.7912	10.2814	12.3894	0.269067	0.000738594	4.30642e-06
ENSG00000178860	MSC	musculin [Source:HGNC Symbol;Acc:7321]	protein_coding	6.47236	5.73209	5.69649	4.26883	4.03885	4.41939	5.96698	4.24236	-0.492134	0.000746117	2.82474e-06
ENSG00000136830	FAM129B	family with sequence similarity 129, member B [Source:HGNC Symbol;Acc:25282]	protein_coding	133.277	128.863	129.825	148.574	145.258	148.245	130.655	147.359	0.173572	0.000709303	4.11305e-05
ENSG00000099942	CRKL	v-crk sarcoma virus CT10 oncogene homolog (avian)-like [Source:HGNC Symbol;Acc:2363]	protein_coding	11.4557	11.2118	11.0387	12.9374	13.1878	13.2194	11.2354	13.1149	0.223151	0.000745379	5.50506e-06
ENSG00000187735	TCEA1	transcription elongation factor A (SII), 1 [Source:HGNC Symbol;Acc:11612]	protein_coding	28.5382	29.0165	29.6743	23.1947	24.2625	24.244	29.0763	23.9004	-0.282811	0.000722502	3.22028e-05
ENSG00000173511	VEGFB	vascular endothelial growth factor B [Source:HGNC Symbol;Acc:12681]	protein_coding	44.3284	39.1004	44.9524	35.3809	31.7129	32.7834	42.7937	33.2924	-0.362207	0.000711482	4.59844e-05
ENSG00000153885	KCTD15	potassium channel tetramerisation domain containing 15 [Source:HGNC Symbol;Acc:23297]	protein_coding	4.52427	4.08886	4.51599	3.32332	3.08252	3.48518	4.37638	3.29701	-0.40858	0.000754515	8.31741e-06
ENSG00000154127	UBASH3B	ubiquitin associated and SH3 domain containing B [Source:HGNC Symbol;Acc:29884]	protein_coding	9.31451	9.10399	8.62419	10.5082	10.7799	9.98819	9.01423	10.4255	0.209835	0.000611476	0.000151374
ENSG00000130816	DNMT1	DNA (cytosine-5-)-methyltransferase 1 [Source:HGNC Symbol;Acc:2976]	protein_coding	25.149	26.0766	24.2738	28.9225	28.201	29.2771	25.1665	28.8002	0.194576	0.000656892	0.000106758
ENSG00000151729	SLC25A4	solute carrier family 25 (mitochondrial carrier; adenine nucleotide translocator), member 4 [Source:HGNC Symbol;Acc:10990]	protein_coding	12.4335	12.7017	13.1485	14.9876	16.1059	15.9557	12.7612	15.6831	0.297441	0.000762877	9.1944e-07
ENSG00000039560	RAI14	retinoic acid induced 14 [Source:HGNC Symbol;Acc:14873]	protein_coding	65.373	66.4199	64.4693	74.9711	75.2053	71.7013	65.4207	73.9592	0.176983	0.000595066	0.000170212
ENSG00000121769	FABP3	fatty acid binding protein 3, muscle and heart (mammary-derived growth inhibitor) [Source:HGNC Symbol;Acc:3557]	protein_coding	7.03675	7.45729	8.28619	4.87967	5.13749	5.22	7.59341	5.07905	-0.58019	0.000764552	1.6533e-06
ENSG00000166396	SERPINB7	serpin peptidase inhibitor, clade B (ovalbumin), member 7 [Source:HGNC Symbol;Acc:13902]	protein_coding	8.233	8.20464	8.87936	10.2325	11.0869	9.90272	8.439	10.4074	0.302464	0.000775446	8.02837e-06
ENSG00000169744	LDB2	LIM domain binding 2 [Source:HGNC Symbol;Acc:6533]	protein_coding	5.73923	5.73796	6.1715	4.50725	4.69813	4.57754	5.88289	4.59431	-0.356679	0.000790685	6.56937e-06
ENSG00000143162	CREG1	cellular repressor of E1A-stimulated genes 1 [Source:HGNC Symbol;Acc:2351]	protein_coding	11.2997	10.6054	11.0318	8.45844	8.12398	8.8792	10.979	8.48721	-0.371381	0.000801313	3.54448e-06
ENSG00000105738	SIPA1L3	signal-induced proliferation-associated 1 like 3 [Source:HGNC Symbol;Acc:23801]	protein_coding	5.48189	5.40687	4.60832	6.72744	6.14077	6.17252	5.16569	6.34691	0.297092	0.000704014	0.00010162
ENSG00000215837	SDHAP2	succinate dehydrogenase complex, subunit A, flavoprotein pseudogene 2 [Source:HGNC Symbol;Acc:27408]	pseudogene	3.21102	3.42808	3.13986	4.2199	3.91042	3.88863	3.25965	4.00632	0.297558	0.000782152	2.85889e-05
ENSG00000166483	WEE1	WEE1 homolog (S. pombe) [Source:HGNC Symbol;Acc:12761]	protein_coding	5.75285	5.39261	5.54071	4.28419	4.63891	4.40676	5.56205	4.44329	-0.32399	0.000791648	2.72223e-05
ENSG00000116497	S100PBP	S100P binding protein [Source:HGNC Symbol;Acc:25768]	protein_coding	3.64078	3.47166	3.62091	2.71715	2.86782	2.80032	3.57778	2.7951	-0.356167	0.000820755	3.43322e-06
ENSG00000164509	IL31RA	interleukin 31 receptor A [Source:HGNC Symbol;Acc:18969]	protein_coding	0.71561	0.785529	0.76358	0.418465	0.380307	0.436947	0.754906	0.411906	-0.87398	0.00082426	1.26176e-07
ENSG00000110108	TMEM109	transmembrane protein 109 [Source:HGNC Symbol;Acc:28771]	protein_coding	28.2316	28.2844	29.5893	33.2668	33.2228	33.4211	28.7018	33.3036	0.214538	0.000820575	6.18983e-06
ENSG00000150636	CCDC102B	coiled-coil domain containing 102B [Source:HGNC Symbol;Acc:26295]	protein_coding	3.50864	3.59642	3.50458	2.40045	2.31	1.65713	3.53655	2.12252	-0.736559	0.000830024	6.0309e-07
ENSG00000136824	SMC2	structural maintenance of chromosomes 2 [Source:HGNC Symbol;Acc:14011]	protein_coding	6.01076	5.96216	5.78341	6.92379	7.14267	6.99586	5.91877	7.02077	0.246331	0.000830107	3.84978e-06
ENSG00000112984	KIF20A	kinesin family member 20A [Source:HGNC Symbol;Acc:9787]	protein_coding	12.0936	12.7704	12.718	13.9977	15.9739	15.5576	12.5273	15.1764	0.276755	0.000847804	5.63717e-06
ENSG00000229644	NAMPTL	nicotinamide phosphoribosyltransferase-like [Source:HGNC Symbol;Acc:17633]	protein_coding	8.10936	7.93172	7.42583	6.01553	5.31382	6.16165	7.8223	5.83033	-0.424015	0.000837307	2.0838e-05
ENSG00000076003	MCM6	minichromosome maintenance complex component 6 [Source:HGNC Symbol;Acc:6949]	protein_coding	10.0558	9.54101	10.0529	11.2685	11.879	12.0052	9.88326	11.7176	0.245612	0.000854789	3.53169e-06
ENSG00000183337	BCOR	BCL6 corepressor [Source:HGNC Symbol;Acc:20893]	protein_coding	1.8054	1.89473	1.63105	2.20587	2.10866	2.4495	1.77706	2.25468	0.343427	0.000814573	4.60525e-05
ENSG00000146122	DAAM2	dishevelled associated activator of morphogenesis 2 [Source:HGNC Symbol;Acc:18143]	protein_coding	3.6139	3.94998	3.5953	5.00264	4.80797	4.21659	3.71973	4.67573	0.329996	0.000823325	3.95901e-05
ENSG00000067225	PKM	pyruvate kinase, muscle [Source:HGNC Symbol;Acc:9021]	protein_coding	297.215	307.757	301.774	339.245	339.769	341.441	302.249	340.152	0.170442	0.00080125	6.93828e-05
ENSG00000111669	TPI1	triosephosphate isomerase 1 [Source:HGNC Symbol;Acc:12009]	protein_coding	144.618	145.507	161.095	167.85	191.537	184.587	150.407	181.325	0.269706	0.000868351	4.70101e-06
ENSG00000116044	NFE2L2	nuclear factor (erythroid-derived 2)-like 2 [Source:HGNC Symbol;Acc:7782]	protein_coding	31.934	31.4387	33.858	25.8888	26.6023	27.9215	32.4102	26.8042	-0.273989	0.000734171	0.000139589
ENSG00000149212	SESN3	sestrin 3 [Source:HGNC Symbol;Acc:23060]	protein_coding	1.85554	1.96562	1.85941	1.45835	1.39581	1.39577	1.89352	1.41664	-0.418597	0.000871942	2.58592e-06
ENSG00000198826	ARHGAP11A	Rho GTPase activating protein 11A [Source:HGNC Symbol;Acc:15783]	protein_coding	7.42674	6.87519	6.83567	8.31968	8.17846	8.3105	7.04587	8.26955	0.231031	0.000854789	2.31577e-05
ENSG00000175061	C17orf76-AS1	C17orf76 antisense RNA 1 [Source:HGNC Symbol;Acc:28619]	processed_transcript	97.1224	93.5224	103.065	81.5438	80.7254	81.2072	97.9034	81.1588	-0.270611	0.000727374	0.000151528
ENSG00000132196	HSD17B7	hydroxysteroid (17-beta) dehydrogenase 7 [Source:HGNC Symbol;Acc:5215]	protein_coding	1.91261	1.83379	1.83481	1.25915	1.1767	1.26537	1.8604	1.23374	-0.592576	0.000880732	3.09357e-07
ENSG00000011028	MRC2	mannose receptor, C type 2 [Source:HGNC Symbol;Acc:16875]	protein_coding	73.1697	70.2553	67.9531	81.8643	78.6217	78.249	70.4594	79.5783	0.175585	0.000516837	0.000371198
ENSG00000104833	TUBB4A	tubulin, beta 4A class IVa [Source:HGNC Symbol;Acc:20774]	protein_coding	0.946077	0.749516	0.817924	1.37559	1.3542	1.59793	0.837839	1.44257	0.783902	0.000890321	2.08974e-07
ENSG00000226458	RP11-417O11.6		sense_intronic	1.41956	1.00459	1.17979	0.395735	0.41493	0.379435	1.20131	0.3967	-1.59849	0.000894625	1.32472e-07
ENSG00000152377	SPOCK1	sparc/osteonectin, cwcv and kazal-like domains proteoglycan (testican) 1 [Source:HGNC Symbol;Acc:11251]	protein_coding	3.99235	3.70342	3.34078	5.04303	5.17671	4.37735	3.67885	4.8657	0.403393	0.000900936	3.50536e-06
ENSG00000134594	RAB33A	RAB33A, member RAS oncogene family [Source:HGNC Symbol;Acc:9773]	protein_coding	1.44108	1.17414	1.60243	0.493359	0.642915	0.720471	1.40588	0.618915	-1.18366	0.000925914	4.53012e-07
ENSG00000027001	MIPEP	mitochondrial intermediate peptidase [Source:HGNC Symbol;Acc:7104]	protein_coding	8.49499	8.61006	8.74656	6.79485	6.62236	6.58617	8.6172	6.66779	-0.37001	0.000935985	1.95124e-06
ENSG00000187189	TSPYL4	TSPY-like 4 [Source:HGNC Symbol;Acc:21559]	protein_coding	10.0962	10.3118	9.93503	11.4286	12.3266	12.1927	10.1143	11.9826	0.244543	0.0009297	9.93319e-06
ENSG00000150867	PIP4K2A	phosphatidylinositol-5-phosphate 4-kinase, type II, alpha [Source:HGNC Symbol;Acc:8997]	protein_coding	10.9349	11.0268	10.2822	8.73642	8.73032	8.13874	10.748	8.53516	-0.332573	0.000864427	7.73296e-05
ENSG00000167106	FAM102A	family with sequence similarity 102, member A [Source:HGNC Symbol;Acc:31419]	protein_coding	6.1531	5.75861	5.81918	4.52638	4.47048	4.94105	5.9103	4.64597	-0.347251	0.000925902	2.34406e-05
ENSG00000070047	PHRF1	PHD and ring finger domains 1 [Source:HGNC Symbol;Acc:24351]	protein_coding	7.14274	6.88437	6.77416	8.37115	7.64675	8.18128	6.93376	8.0664	0.218287	0.000845191	0.000106883
ENSG00000196549	MME	membrane metallo-endopeptidase [Source:HGNC Symbol;Acc:7154]	protein_coding	11.0117	10.8734	10.4907	8.59448	8.74927	7.19218	10.7919	8.17864	-0.40002	0.000917809	3.43014e-05
ENSG00000134775	FHOD3	formin homology 2 domain containing 3 [Source:HGNC Symbol;Acc:26178]	protein_coding	5.35444	5.15268	5.24952	6.00719	6.47287	6.64123	5.25222	6.37376	0.279219	0.000952181	3.60442e-06
ENSG00000124145	SDC4	syndecan 4 [Source:HGNC Symbol;Acc:10661]	protein_coding	70.1703	72.1403	76.6215	84.2491	79.6758	85.1811	72.9774	83.0353	0.186276	0.000735027	0.00023288
ENSG00000168496	FEN1	flap structure-specific endonuclease 1 [Source:HGNC Symbol;Acc:3650]	protein_coding	6.34044	6.21105	6.66126	7.73928	7.93458	8.41247	6.40425	8.02878	0.32615	0.000969937	8.57165e-07
ENSG00000215114	UBXN2B	UBX domain protein 2B [Source:HGNC Symbol;Acc:27035]	protein_coding	2.79694	2.80066	2.80228	1.93832	2.17319	2.079	2.79996	2.0635	-0.440313	0.000970018	2.45747e-06
ENSG00000149948	HMGA2	high mobility group AT-hook 2 [Source:HGNC Symbol;Acc:5009]	protein_coding	17.9149	17.7551	17.8649	20.9424	21.1429	19.4953	17.845	20.5269	0.201997	0.000925902	5.77606e-05
ENSG00000196305	IARS	isoleucyl-tRNA synthetase [Source:HGNC Symbol;Acc:5330]	protein_coding	55.217	56.2126	55.0396	45.2115	47.0699	46.6809	55.4897	46.3208	-0.260562	0.00088063	0.000119668
ENSG00000105953	OGDH	oxoglutarate (alpha-ketoglutarate) dehydrogenase (lipoamide) [Source:HGNC Symbol;Acc:8124]	protein_coding	17.2976	18.0514	17.3362	20.1361	19.9759	20.4684	17.5617	20.1935	0.201455	0.000987928	2.83379e-05
ENSG00000113108	APBB3	amyloid beta (A4) precursor protein-binding, family B, member 3 [Source:HGNC Symbol;Acc:20708]	protein_coding	4.14846	3.90261	4.04885	2.99252	2.52425	3.09443	4.03331	2.8704	-0.490711	0.00102762	9.25636e-07
ENSG00000169071	ROR2	receptor tyrosine kinase-like orphan receptor 2 [Source:HGNC Symbol;Acc:10257]	protein_coding	1.46506	1.36079	1.36083	1.03476	0.862849	0.887498	1.39556	0.92837	-0.588071	0.00103888	3.37428e-06
ENSG00000166670	MMP10	matrix metallopeptidase 10 (stromelysin 2) [Source:HGNC Symbol;Acc:7156]	protein_coding	0.379922	0.285666	0.365606	0.788457	0.824937	0.874888	0.343731	0.829427	1.27083	0.00104933	5.18115e-08
ENSG00000107863	ARHGAP21	Rho GTPase activating protein 21 [Source:HGNC Symbol;Acc:23725]	protein_coding	16.614	17.5533	15.3972	13.3032	13.6371	13.0849	16.5215	13.3418	-0.308395	0.000768805	0.000281677
ENSG00000113328	CCNG1	cyclin G1 [Source:HGNC Symbol;Acc:1592]	protein_coding	51.245	49.6347	53.2551	42.1479	44.295	41.3527	51.3783	42.5985	-0.270355	0.000820755	0.000265739
ENSG00000196352	CD55	CD55 molecule, decay accelerating factor for complement (Cromer blood group) [Source:HGNC Symbol;Acc:2665]	protein_coding	11.5615	11.9707	12.5096	9.66586	9.77739	9.47563	12.0139	9.63963	-0.317661	0.0010572	3.72776e-05
ENSG00000260841	CTC-205M6.5		sense_overlapping	0.885757	1.15754	0.993394	1.5141	1.55341	1.63653	1.01223	1.56801	0.631399	0.00110034	9.80154e-07
ENSG00000134769	DTNA	dystrobrevin, alpha [Source:HGNC Symbol;Acc:3057]	protein_coding	1.21423	1.32617	1.2695	0.912859	0.8962	0.951074	1.26996	0.920044	-0.465013	0.00111091	2.33931e-06
ENSG00000166317	SYNPO2L	synaptopodin 2-like [Source:HGNC Symbol;Acc:23532]	protein_coding	0.359484	0.392477	0.37656	0.672786	0.59174	0.658991	0.376174	0.641172	0.769313	0.00112237	2.41327e-07
ENSG00000078403	MLLT10	myeloid/lymphoid or mixed-lineage leukemia (trithorax homolog, Drosophila); translocated to, 10 [Source:HGNC Symbol;Acc:16063]	protein_coding	7.1621	6.96954	6.68915	5.49923	5.45887	5.65484	6.94026	5.53765	-0.325717	0.00111466	1.95246e-05
ENSG00000141068	KSR1	kinase suppressor of ras 1 [Source:HGNC Symbol;Acc:6465]	protein_coding	4.86374	4.85355	4.81482	3.95571	3.63625	3.96863	4.84404	3.85353	-0.33003	0.00111793	2.41413e-05
ENSG00000105829	BET1	blocked early in transport 1 homolog (S. cerevisiae) [Source:HGNC Symbol;Acc:14562]	protein_coding	5.98134	5.40824	6.1671	4.49415	4.7044	4.49584	5.85223	4.5648	-0.358436	0.00112498	3.62819e-05
ENSG00000060138	CSDA	cold shock domain protein A [Source:HGNC Symbol;Acc:2428]	protein_coding	17.4659	16.0137	16.9153	13.7769	14.0142	13.7342	16.7983	13.8418	-0.279287	0.00107241	9.16871e-05
ENSG00000118526	TCF21	transcription factor 21 [Source:HGNC Symbol;Acc:11632]	protein_coding	22.4612	21.9271	22.2501	17.9379	18.0535	18.6481	22.2128	18.2132	-0.286407	0.00116458	1.82543e-05
ENSG00000147403	RPL10	ribosomal protein L10 [Source:HGNC Symbol;Acc:10298]	protein_coding	117.339	124.704	129.455	102.112	101.956	104.852	123.833	102.973	-0.266123	0.000854789	0.000340636
ENSG00000165507	C10orf10	chromosome 10 open reading frame 10 [Source:HGNC Symbol;Acc:23355]	protein_coding	6.60867	6.74322	6.40401	7.82664	8.32276	8.1317	6.5853	8.0937	0.297551	0.00120796	2.20627e-06
ENSG00000172594	SMPDL3A	sphingomyelin phosphodiesterase, acid-like 3A [Source:HGNC Symbol;Acc:17389]	protein_coding	7.69427	7.01406	7.78898	5.49704	5.43264	5.79383	7.4991	5.5745	-0.427875	0.00120813	3.207e-06
ENSG00000145390	USP53	ubiquitin specific peptidase 53 [Source:HGNC Symbol;Acc:29255]	protein_coding	15.1093	14.5877	14.8545	18.1952	18.1968	16.1229	14.8505	17.505	0.237252	0.00117682	5.20624e-05
ENSG00000116871	MAP7D1	MAP7 domain containing 1 [Source:HGNC Symbol;Acc:25514]	protein_coding	30.6283	31.0769	31.0055	34.9081	33.8364	36.6203	30.9035	35.1216	0.184586	0.00116499	8.41435e-05
ENSG00000092470	WDR76	WD repeat domain 76 [Source:HGNC Symbol;Acc:25773]	protein_coding	3.18985	3.08597	3.08057	3.86571	4.02814	3.98711	3.11879	3.96032	0.344629	0.00127816	5.54488e-07
ENSG00000233913	CTC-575D19.1		pseudogene	60.2709	60.0765	66.5698	47.1679	49.585	53.1192	62.3057	49.9574	-0.318668	0.0010572	0.00023288
ENSG00000122378	FAM213A	family with sequence similarity 213, member A [Source:HGNC Symbol;Acc:28651]	protein_coding	6.19222	6.40882	6.68813	4.46163	4.90478	4.93598	6.42972	4.76747	-0.431534	0.00129327	6.64565e-06
ENSG00000101928	MOSPD1	motile sperm domain containing 1 [Source:HGNC Symbol;Acc:25235]	protein_coding	18.0604	18.4094	19.1237	15.1275	14.5962	13.3579	18.5312	14.3605	-0.367847	0.00128823	1.27142e-05
ENSG00000085511	MAP3K4	mitogen-activated protein kinase kinase kinase 4 [Source:HGNC Symbol;Acc:6856]	protein_coding	4.24768	4.11383	4.01419	3.26511	3.12182	3.26013	4.12523	3.21568	-0.35935	0.00129626	6.53797e-06
ENSG00000079819	EPB41L2	erythrocyte membrane protein band 4.1-like 2 [Source:HGNC Symbol;Acc:3379]	protein_coding	41.5447	44.443	39.8698	48.3155	52.262	48.294	41.9525	49.6238	0.242276	0.00126796	4.01928e-05
ENSG00000171067	C11orf24	chromosome 11 open reading frame 24 [Source:HGNC Symbol;Acc:1174]	protein_coding	21.1036	19.7751	21.281	23.1178	24.3191	24.5058	20.7199	23.9809	0.210869	0.00129327	2.10042e-05
ENSG00000170624	SGCD	sarcoglycan, delta (35kDa dystrophin-associated glycoprotein) [Source:HGNC Symbol;Acc:10807]	protein_coding	3.76921	3.96334	3.5248	4.76878	5.02689	4.27225	3.75245	4.68931	0.321541	0.00131887	1.86863e-05
ENSG00000087076	HSD17B14	hydroxysteroid (17-beta) dehydrogenase 14 [Source:HGNC Symbol;Acc:23238]	protein_coding	3.92398	4.36405	4.3396	2.80432	2.03736	2.56372	4.20921	2.46847	-0.769934	0.00133738	4.7579e-07
ENSG00000260006	RP11-469M7.1		lincRNA	1.6821	1.22996	1.56706	0.86912	0.795041	0.947787	1.49304	0.87065	-0.77809	0.00133811	5.7387e-06
ENSG00000147872	PLIN2	perilipin 2 [Source:HGNC Symbol;Acc:248]	protein_coding	19.7048	20.0653	20.8246	16.5172	17.2241	15.9702	20.1982	16.5705	-0.285613	0.00118563	0.000168711
ENSG00000165244	ZNF367	zinc finger protein 367 [Source:HGNC Symbol;Acc:18320]	protein_coding	1.29976	1.16674	1.51445	1.84412	1.95056	1.89078	1.32698	1.89515	0.514163	0.0013583	3.52609e-06
ENSG00000132170	PPARG	peroxisome proliferator-activated receptor gamma [Source:HGNC Symbol;Acc:9236]	protein_coding	15.0849	14.8655	15.6402	12.0161	12.4281	12.5039	15.1969	12.3161	-0.303234	0.00133675	2.54201e-05
ENSG00000137575	SDCBP	syndecan binding protein (syntenin) [Source:HGNC Symbol;Acc:10662]	protein_coding	43.9797	43.1001	46.978	37.1547	37.0767	37.0821	44.6859	37.1045	-0.268226	0.00121165	0.000170265
ENSG00000006744	ELAC2	elaC homolog 2 (E. coli) [Source:HGNC Symbol;Acc:14198]	protein_coding	9.4759	9.89673	9.18094	10.769	10.8695	11.4618	9.51786	11.0334	0.213174	0.00129437	9.02268e-05
ENSG00000181827	RFX7	regulatory factor X, 7 [Source:HGNC Symbol;Acc:25777]	protein_coding	5.60628	5.40755	4.90984	4.22125	4.30519	3.95327	5.30789	4.15991	-0.351588	0.00122061	0.000194505
ENSG00000118898	PPL	periplakin [Source:HGNC Symbol;Acc:9273]	protein_coding	1.47226	1.46417	1.06552	0.857708	0.873711	0.851867	1.33398	0.861095	-0.631497	0.00134692	6.8548e-05
ENSG00000225630	MTND2P28	MT-ND2 pseudogene 28 [Source:HGNC Symbol;Acc:42129]	pseudogene	449.229	468.472	491.314	391.47	329.702	388.591	469.672	369.921	-0.344436	0.00121165	0.000213305
ENSG00000164615	CAMLG	calcium modulating ligand [Source:HGNC Symbol;Acc:1471]	protein_coding	19.4013	19.7785	21.0882	15.6887	16.7989	15.751	20.0893	16.0795	-0.321203	0.00134088	8.7158e-05
ENSG00000166340	TPP1	tripeptidyl peptidase I [Source:HGNC Symbol;Acc:2073]	protein_coding	58.4378	61.3215	59.8987	51.376	47.6766	47.1089	59.886	48.7205	-0.29769	0.00129088	0.000142015
ENSG00000147883	CDKN2B	cyclin-dependent kinase inhibitor 2B (p15, inhibits CDK4) [Source:HGNC Symbol;Acc:1788]	protein_coding	6.20485	5.82303	6.0323	4.52815	4.57998	4.78835	6.02006	4.63216	-0.378092	0.00143725	2.96986e-06
ENSG00000164099	PRSS12	protease, serine, 12 (neurotrypsin, motopsin) [Source:HGNC Symbol;Acc:9477]	protein_coding	22.7162	23.8962	22.668	18.7368	19.8708	18.4365	23.0934	19.0147	-0.280369	0.00106326	0.000396822
ENSG00000214185	XPOTP1	exportin, tRNA (nuclear export receptor for tRNAs) pseudogene 1 [Source:HGNC Symbol;Acc:16586]	pseudogene	2.37409	2.80876	2.89959	1.82898	1.80268	1.64929	2.69415	1.76032	-0.613995	0.0014689	1.1634e-05
ENSG00000247095	MIR210HG	MIR210 host gene (non-protein coding) [Source:HGNC Symbol;Acc:39524]	lincRNA	0.630342	0.903675	0.742654	1.30137	1.29773	1.37267	0.75889	1.32392	0.802856	0.00151213	4.22897e-07
ENSG00000128606	LRRC17	leucine rich repeat containing 17 [Source:HGNC Symbol;Acc:16895]	protein_coding	65.5485	63.7556	69.3561	72.6097	77.4098	75.9043	66.2201	75.3079	0.185533	0.00140608	0.000110576
ENSG00000179750	APOBEC3B	apolipoprotein B mRNA editing enzyme, catalytic polypeptide-like 3B [Source:HGNC Symbol;Acc:17352]	protein_coding	4.3111	4.19124	3.79058	5.16113	5.42781	5.83781	4.09764	5.47558	0.418218	0.00151316	5.41096e-06
ENSG00000251562	MALAT1	metastasis associated lung adenocarcinoma transcript 1 (non-protein coding) [Source:HGNC Symbol;Acc:29665]	lincRNA	142.318	142.658	140.45	105.8	126.03	96.1441	141.809	109.325	-0.375329	0.000696021	0.000849661
ENSG00000226608	FTLP3	ferritin, light polypeptide pseudogene 3 [Source:HGNC Symbol;Acc:4000]	pseudogene	363.282	353.674	388.346	310.399	284.315	312.036	368.434	302.25	-0.285666	0.00122748	0.000340826
ENSG00000135205	CCDC146	coiled-coil domain containing 146 [Source:HGNC Symbol;Acc:29296]	protein_coding	1.55349	1.32697	1.49707	0.987943	0.900044	0.982184	1.45918	0.956724	-0.608981	0.0015798	2.5801e-06
ENSG00000166189	HPS6	Hermansky-Pudlak syndrome 6 [Source:HGNC Symbol;Acc:18817]	protein_coding	7.80097	7.17877	6.79039	8.6318	8.56913	9.43533	7.25671	8.87876	0.291042	0.00153341	5.48244e-05
ENSG00000099251	HSD17B7P2	hydroxysteroid (17-beta) dehydrogenase 7 pseudogene 2 [Source:HGNC Symbol;Acc:28120]	pseudogene	2.94205	2.94698	3.32072	1.85118	1.75361	2.1753	3.06991	1.9267	-0.672069	0.00162703	3.48715e-06
ENSG00000145623	OSMR	oncostatin M receptor [Source:HGNC Symbol;Acc:8507]	protein_coding	30.0493	31.1307	28.5229	34.2621	33.8916	33.7324	29.901	33.962	0.183729	0.00127787	0.00036974
ENSG00000135185	C7orf23	chromosome 7 open reading frame 23 [Source:HGNC Symbol;Acc:21707]	protein_coding	5.01056	4.29247	5.01369	3.40478	3.5832	3.66315	4.77224	3.55038	-0.426694	0.00162267	3.52613e-05
ENSG00000092841	MYL6	myosin, light chain 6, alkali, smooth muscle and non-muscle [Source:HGNC Symbol;Acc:7587]	protein_coding	187.731	199.488	222.971	229.545	238.247	241.21	203.397	236.334	0.21653	0.00135365	0.00031504
ENSG00000177602	GSG2	germ cell associated 2 (haspin) [Source:HGNC Symbol;Acc:19682]	protein_coding	0.656803	0.630737	0.726035	1.12963	1.20069	1.06708	0.671192	1.13247	0.754671	0.00167622	3.74469e-07
ENSG00000176641	RNF152	ring finger protein 152 [Source:HGNC Symbol;Acc:26811]	protein_coding	2.49726	2.54339	2.41077	1.96626	1.96965	1.77783	2.48381	1.90458	-0.383081	0.00164288	3.83516e-05
ENSG00000177706	FAM20C	family with sequence similarity 20, member C [Source:HGNC Symbol;Acc:22140]	protein_coding	41.7125	38.38	39.1998	46.3372	43.0719	51.3349	39.7641	46.9147	0.238572	0.00155907	0.000148558
ENSG00000143933	CALM2	calmodulin 2 (phosphorylase kinase, delta) [Source:HGNC Symbol;Acc:1445]	protein_coding	112.681	116.769	127.131	133.305	137.12	136.054	118.86	135.493	0.188954	0.00153341	0.000201928
ENSG00000105894	PTN	pleiotrophin [Source:HGNC Symbol;Acc:9630]	protein_coding	50.5016	50.5806	54.3202	58.9486	59.3114	59.6763	51.8008	59.3121	0.195352	0.00169122	4.57587e-05
ENSG00000207949	MIR214	microRNA 214 [Source:HGNC Symbol;Acc:31591]	miRNA	11.8545	11.0108	12.2173	4.13763	5.3243	3.99494	11.6942	4.48563	-1.38241	0.00173729	3.22123e-07
ENSG00000147905	ZCCHC7	zinc finger, CCHC domain containing 7 [Source:HGNC Symbol;Acc:26209]	protein_coding	6.06783	5.62865	6.44241	4.48004	4.86472	4.72271	6.04629	4.68916	-0.366722	0.00169122	5.18678e-05
ENSG00000130706	ADRM1	adhesion regulating molecule 1 [Source:HGNC Symbol;Acc:15759]	protein_coding	27.2382	26.1725	26.5041	31.1469	29.0094	32.1442	26.6383	30.7668	0.207874	0.00161288	0.000134337
ENSG00000138829	FBN2	fibrillin 2 [Source:HGNC Symbol;Acc:3604]	protein_coding	28.2667	31.5269	24.7409	38.9212	39.1687	34.4897	28.1782	37.5266	0.413334	0.00176981	2.21403e-06
ENSG00000133226	SRRM1	serine/arginine repetitive matrix 1 [Source:HGNC Symbol;Acc:16638]	protein_coding	12.2228	11.8544	11.2042	13.8576	14.1813	12.9157	11.7605	13.6515	0.215118	0.00154382	0.000228786
ENSG00000133048	CHI3L1	chitinase 3-like 1 (cartilage glycoprotein-39) [Source:HGNC Symbol;Acc:1932]	protein_coding	1.13855	1.20488	1.38875	0.819514	0.572842	0.628606	1.24406	0.673654	-0.88498	0.00177561	3.79889e-07
ENSG00000086598	TMED2	transmembrane emp24 domain trafficking protein 2 [Source:HGNC Symbol;Acc:16996]	protein_coding	73.5301	72.0936	78.4292	61.2132	63.8328	62.3252	74.6843	62.4571	-0.25794	0.00139542	0.000396409
ENSG00000132361	KIAA0664	KIAA0664 [Source:HGNC Symbol;Acc:29094]	protein_coding	11.869	11.1712	11.2938	13.589	12.5469	13.3859	11.4447	13.1739	0.203009	0.00160668	0.000186798
ENSG00000188493	C19orf54	chromosome 19 open reading frame 54 [Source:HGNC Symbol;Acc:24758]	protein_coding	3.54574	3.71994	3.51211	2.54955	2.42556	2.69303	3.59259	2.55605	-0.491113	0.0017922	3.8461e-06
ENSG00000138660	AP1AR	adaptor-related protein complex 1 associated regulatory protein [Source:HGNC Symbol;Acc:28808]	protein_coding	4.68208	4.56328	5.3188	3.83248	3.57118	3.42917	4.85472	3.61094	-0.427013	0.00172414	7.70708e-05
ENSG00000081923	ATP8B1	ATPase, aminophospholipid transporter, class I, type 8B, member 1 [Source:HGNC Symbol;Acc:3706]	protein_coding	45.5916	44.2721	41.1906	53.5147	52.5236	47.9185	43.6848	51.3189	0.23236	0.00161025	0.000195129
ENSG00000049192	ADAMTS6	ADAM metallopeptidase with thrombospondin type 1 motif, 6 [Source:HGNC Symbol;Acc:222]	protein_coding	1.25111	1.12413	1.24132	1.52137	1.78072	1.50679	1.20552	1.60296	0.411082	0.00180438	6.56743e-06
ENSG00000139910	NOVA1	neuro-oncological ventral antigen 1 [Source:HGNC Symbol;Acc:7886]	protein_coding	0.465557	0.468186	0.517681	0.305108	0.276252	0.296235	0.483808	0.292532	-0.725841	0.00182483	8.87913e-07
ENSG00000197989	SNHG12	small nucleolar RNA host gene 12 (non-protein coding) [Source:HGNC Symbol;Acc:30062]	lincRNA	2.92902	2.67682	3.00198	3.49806	3.82372	3.87945	2.86928	3.73374	0.379937	0.00182292	3.43322e-06
ENSG00000145244	CORIN	corin, serine peptidase [Source:HGNC Symbol;Acc:19012]	protein_coding	1.30221	1.21246	1.28886	1.52182	1.63127	1.65821	1.26785	1.60377	0.339085	0.00182483	2.13936e-06
ENSG00000093000	NUP50	nucleoporin 50kDa [Source:HGNC Symbol;Acc:8065]	protein_coding	8.53843	8.32158	8.32813	9.64983	9.74479	9.54379	8.39605	9.64614	0.200241	0.00180438	2.65796e-05
ENSG00000154305	MIA3	melanoma inhibitory activity family, member 3 [Source:HGNC Symbol;Acc:24008]	protein_coding	11.0826	11.4402	10.541	9.0882	9.12241	9.00257	11.0213	9.07106	-0.280946	0.00154652	0.000292706
ENSG00000238917	SNORD10	small nucleolar RNA, C/D box 10 [Source:HGNC Symbol;Acc:32706]	snoRNA	26.8774	24.7564	24.8947	15.4433	13.5518	14.8931	25.5095	14.6294	-0.802163	0.00185336	4.5205e-07
ENSG00000102096	PIM2	pim-2 oncogene [Source:HGNC Symbol;Acc:8987]	protein_coding	2.64945	2.43948	2.76174	1.62598	1.7778	1.90993	2.61689	1.77124	-0.563096	0.00184981	6.29515e-06
ENSG00000061337	LZTS1	leucine zipper, putative tumor suppressor 1 [Source:HGNC Symbol;Acc:13861]	protein_coding	3.68437	3.76384	3.37414	4.2348	4.24252	4.69787	3.60745	4.39173	0.28381	0.00178148	7.51216e-05
ENSG00000138180	CEP55	centrosomal protein 55kDa [Source:HGNC Symbol;Acc:1161]	protein_coding	11.7263	11.3704	11.5575	13.1111	13.8466	13.8628	11.5514	13.6068	0.236266	0.00184895	8.68138e-06
ENSG00000186866	POFUT2	protein O-fucosyltransferase 2 [Source:HGNC Symbol;Acc:14683]	protein_coding	22.1328	21.7503	21.6317	25.4955	23.7476	24.9	21.8383	24.7144	0.178492	0.0016432	0.000238768
ENSG00000030110	BAK1	BCL2-antagonist/killer 1 [Source:HGNC Symbol;Acc:949]	protein_coding	5.87356	5.69715	6.57752	7.86382	7.46754	7.2476	6.04941	7.52632	0.31515	0.00185563	4.39924e-05
ENSG00000156273	BACH1	BTB and CNC homology 1, basic leucine zipper transcription factor 1 [Source:HGNC Symbol;Acc:935]	protein_coding	14.8256	14.7392	14.2547	12.039	12.2288	11.1594	14.6065	11.809	-0.306718	0.00182896	8.91244e-05
ENSG00000166037	CEP57	centrosomal protein 57kDa [Source:HGNC Symbol;Acc:30794]	protein_coding	7.23795	6.53976	7.17935	5.60541	5.82449	5.41878	6.98569	5.61623	-0.314801	0.0017981	0.000163811
ENSG00000111802	TDP2	tyrosyl-DNA phosphodiesterase 2 [Source:HGNC Symbol;Acc:17768]	protein_coding	15.0666	15.4895	15.5745	12.4451	12.4787	12.1375	15.3769	12.3537	-0.315812	0.00194064	2.72223e-05
ENSG00000172939	OXSR1	oxidative-stress responsive 1 [Source:HGNC Symbol;Acc:8508]	protein_coding	14.2193	15.0356	14.1868	16.4756	17.188	16.0768	14.4806	16.5801	0.195336	0.00169556	0.000278356
ENSG00000029153	ARNTL2	aryl hydrocarbon receptor nuclear translocator-like 2 [Source:HGNC Symbol;Acc:18984]	protein_coding	7.78908	8.26234	7.39434	9.08675	9.69041	8.9391	7.81525	9.23875	0.241406	0.00179327	0.000186112
ENSG00000151725	MLF1IP	MLF1 interacting protein [Source:HGNC Symbol;Acc:21348]	protein_coding	4.606	4.45644	5.32789	5.79796	6.04905	6.38983	4.79678	6.07895	0.341756	0.0019705	1.58715e-05
ENSG00000111602	TIMELESS	timeless homolog (Drosophila) [Source:HGNC Symbol;Acc:11813]	protein_coding	7.13603	6.79123	6.83724	8.1374	7.90158	8.3717	6.9215	8.13689	0.233393	0.00197663	1.9905e-05
ENSG00000112619	PRPH2	peripherin 2 (retinal degeneration, slow) [Source:HGNC Symbol;Acc:9942]	protein_coding	1.7004	1.87737	1.92542	1.16867	1.20972	1.14515	1.83439	1.17451	-0.64324	0.00200363	2.22892e-06
ENSG00000213763	ACTBP2	actin, beta pseudogene 2 [Source:HGNC Symbol;Acc:135]	pseudogene	58.4269	62.397	58.0402	65.8411	70.704	79.5831	59.6214	72.0427	0.273023	0.00193869	6.75815e-05
ENSG00000117036	ETV3	ets variant 3 [Source:HGNC Symbol;Acc:3492]	protein_coding	4.71833	4.78774	4.61293	3.77551	3.6925	3.61999	4.70633	3.696	-0.348639	0.00198987	1.69551e-05
ENSG00000160877	NACC1	nucleus accumbens associated 1, BEN and BTB (POZ) domain containing [Source:HGNC Symbol;Acc:20967]	protein_coding	24.9506	23.076	22.2028	26.7835	26.3415	27.2632	23.4098	26.7961	0.19491	0.00171296	0.000297145
ENSG00000118985	ELL2	elongation factor, RNA polymerase II, 2 [Source:HGNC Symbol;Acc:17064]	protein_coding	39.4379	36.8674	39.8716	31.8545	32.7196	32.6429	38.7256	32.4057	-0.257042	0.00175677	0.000255665
ENSG00000225783	MIAT	myocardial infarction associated transcript (non-protein coding) [Source:HGNC Symbol;Acc:33425]	lincRNA	2.65086	2.4622	2.1527	1.8921	1.75902	1.81522	2.42192	1.82211	-0.41054	0.0018982	0.00013147
ENSG00000169213	RAB3B	RAB3B, member RAS oncogene family [Source:HGNC Symbol;Acc:9778]	protein_coding	32.1515	33.8055	29.2152	40.2601	40.6439	36.4314	31.7241	39.1118	0.302026	0.00202116	1.21087e-05
ENSG00000018189	RUFY3	RUN and FYVE domain containing 3 [Source:HGNC Symbol;Acc:30285]	protein_coding	7.49208	7.01376	7.33458	6.05263	5.75409	5.83338	7.28014	5.88004	-0.308141	0.00198808	5.55689e-05
ENSG00000176619	LMNB2	lamin B2 [Source:HGNC Symbol;Acc:6638]	protein_coding	29.9781	30.3298	28.0589	33.9153	31.745	34.5085	29.4556	33.3896	0.180858	0.00112692	0.000943938
ENSG00000196230	TUBB	tubulin, beta class I [Source:HGNC Symbol;Acc:20778]	protein_coding	497.071	507.548	526.874	555.218	585.466	575.658	510.498	572.114	0.164397	0.00187028	0.000207275
ENSG00000117586	TNFSF4	tumor necrosis factor (ligand) superfamily, member 4 [Source:HGNC Symbol;Acc:11934]	protein_coding	19.3556	20.1813	21.9151	23.4697	24.472	23.243	20.484	23.7282	0.212107	0.00193869	0.000149836
ENSG00000196154	S100A4	S100 calcium binding protein A4 [Source:HGNC Symbol;Acc:10494]	protein_coding	40.431	40.2914	46.3453	32.0313	33.7936	35.0215	42.3559	33.6155	-0.333438	0.0018473	0.000241987
ENSG00000198189	HSD17B11	hydroxysteroid (17-beta) dehydrogenase 11 [Source:HGNC Symbol;Acc:22960]	protein_coding	9.20839	8.78352	10.0424	7.29821	6.9179	7.35414	9.34476	7.19008	-0.378149	0.00206593	3.6797e-05
ENSG00000035115	SH3YL1	SH3 domain containing, Ysc84-like 1 (S. cerevisiae) [Source:HGNC Symbol;Acc:29546]	protein_coding	3.13983	2.93379	2.95312	2.40243	2.38032	2.29282	3.00892	2.35852	-0.35136	0.00208164	2.17295e-05
ENSG00000129009	ISLR	immunoglobulin superfamily containing leucine-rich repeat [Source:HGNC Symbol;Acc:6133]	protein_coding	0.512022	0.37604	0.514083	0.1704	0.146181	0.215938	0.467382	0.177506	-1.39673	0.00210666	8.85199e-07
ENSG00000110104	CCDC86	coiled-coil domain containing 86 [Source:HGNC Symbol;Acc:28359]	protein_coding	11.6545	11.8223	11.749	14.3319	13.4943	14.3373	11.7419	14.0545	0.259364	0.0021023	1.30854e-05
ENSG00000004776	HSPB6	heat shock protein, alpha-crystallin-related, B6 [Source:HGNC Symbol;Acc:26511]	protein_coding	147.215	144.462	141.685	118.563	113.701	126.431	144.454	119.565	-0.272818	0.00179327	0.000323785
ENSG00000169118	CSNK1G1	casein kinase 1, gamma 1 [Source:HGNC Symbol;Acc:2454]	protein_coding	3.87639	3.55592	3.43868	2.80005	2.70961	3.03504	3.62367	2.84823	-0.347383	0.00193951	0.000201166
ENSG00000150093	ITGB1	integrin, beta 1 (fibronectin receptor, beta polypeptide, antigen CD29 includes MDF2, MSK12) [Source:HGNC Symbol;Acc:6153]	protein_coding	561.476	588.584	589.647	662.225	702.924	633.73	579.902	666.293	0.200346	0.00197506	0.000167382
ENSG00000140941	MAP1LC3B	microtubule-associated protein 1 light chain 3 beta [Source:HGNC Symbol;Acc:13352]	protein_coding	26.6438	24.3804	27.2518	21.4476	20.9484	22.3931	26.092	21.5964	-0.272819	0.00168316	0.000471557
ENSG00000164938	TP53INP1	tumor protein p53 inducible nuclear protein 1 [Source:HGNC Symbol;Acc:18022]	protein_coding	8.10647	7.92443	7.6417	6.31016	6.40201	6.28053	7.89087	6.3309	-0.317773	0.00213224	4.13273e-05
ENSG00000040275	CCDC99	coiled-coil domain containing 99 [Source:HGNC Symbol;Acc:26010]	protein_coding	4.7471	4.4216	5.0272	5.43081	5.94915	5.79547	4.73197	5.72514	0.274872	0.00216128	2.92696e-05
ENSG00000225485	ARHGAP23	Rho GTPase activating protein 23 [Source:HGNC Symbol;Acc:29293]	protein_coding	24.2437	23.7698	21.2873	27.7539	26.2205	25.9738	23.1003	26.6494	0.206194	0.00122835	0.000969385
ENSG00000145604	SKP2	S-phase kinase-associated protein 2, E3 ubiquitin protein ligase [Source:HGNC Symbol;Acc:10901]	protein_coding	7.29432	7.23711	6.9212	8.16851	8.43872	9.01192	7.15087	8.53972	0.256068	0.0021731	2.97625e-05
ENSG00000073331	ALPK1	alpha-kinase 1 [Source:HGNC Symbol;Acc:20917]	protein_coding	1.36782	1.23098	1.17375	0.922257	0.995495	0.900464	1.25752	0.939405	-0.420759	0.0021023	0.000102165
ENSG00000168040	FADD	Fas (TNFRSF6)-associated via death domain [Source:HGNC Symbol;Acc:3573]	protein_coding	3.507	3.73879	2.99928	4.38261	4.86281	5.89287	3.41502	5.0461	0.563272	0.00222847	1.76978e-05
ENSG00000163781	TOPBP1	topoisomerase (DNA) II binding protein 1 [Source:HGNC Symbol;Acc:17008]	protein_coding	6.55625	6.89674	6.4574	8.06569	8.54441	7.39854	6.63679	8.00288	0.270033	0.00218685	6.11676e-05
ENSG00000196923	PDLIM7	PDZ and LIM domain 7 (enigma) [Source:HGNC Symbol;Acc:22958]	protein_coding	73.6557	64.1569	69.8726	78.8845	76.5355	80.2394	69.2284	78.5531	0.182305	0.00167622	0.000577058
ENSG00000145386	CCNA2	cyclin A2 [Source:HGNC Symbol;Acc:1578]	protein_coding	10.541	10.002	10.9257	11.8863	13.8997	12.8734	10.4896	12.8865	0.296904	0.00225455	1.21245e-05
ENSG00000176692	FOXC2	forkhead box C2 (MFH-1, mesenchyme forkhead 1) [Source:HGNC Symbol;Acc:3801]	protein_coding	2.94805	2.24675	2.70801	3.95816	3.38051	3.8187	2.63427	3.71912	0.497561	0.00222327	4.92858e-05
ENSG00000105355	PLIN3	perilipin 3 [Source:HGNC Symbol;Acc:16893]	protein_coding	89.9507	86.0105	89.1065	100.629	96.0748	101.093	88.3559	99.2658	0.16797	0.00207845	0.000198189
ENSG00000155158	TTC39B	tetratricopeptide repeat domain 39B [Source:HGNC Symbol;Acc:23704]	protein_coding	1.97068	2.06328	1.86913	1.42978	1.37529	1.40976	1.9677	1.40494	-0.485997	0.00227281	6.56937e-06
ENSG00000014138	POLA2	polymerase (DNA directed), alpha 2, accessory subunit [Source:HGNC Symbol;Acc:30073]	protein_coding	3.46043	3.32249	3.6889	3.94903	4.41766	4.42725	3.49061	4.26465	0.288949	0.00225627	2.91148e-05
ENSG00000144935	TRPC1	transient receptor potential cation channel, subfamily C, member 1 [Source:HGNC Symbol;Acc:12333]	protein_coding	4.36917	4.12636	4.86512	3.43212	3.33407	3.47348	4.45355	3.41322	-0.383821	0.00222327	7.05165e-05
ENSG00000134278	SPIRE1	spire homolog 1 (Drosophila) [Source:HGNC Symbol;Acc:30622]	protein_coding	7.98213	7.74476	7.87735	6.50788	6.36625	6.12426	7.86808	6.3328	-0.313168	0.00226779	5.13566e-05
ENSG00000145358	DDIT4L	DNA-damage-inducible transcript 4-like [Source:HGNC Symbol;Acc:30555]	protein_coding	4.11105	4.223	4.14712	5.02348	5.43066	5.30224	4.16039	5.25213	0.336183	0.00235367	3.04027e-06
ENSG00000139974	SLC38A6	solute carrier family 38, member 6 [Source:HGNC Symbol;Acc:19863]	protein_coding	6.3894	5.63046	6.30622	4.54199	5.04466	4.34364	6.10869	4.64343	-0.395673	0.00233584	4.18726e-05
ENSG00000198840	MT-ND3	mitochondrially encoded NADH dehydrogenase 3 [Source:HGNC Symbol;Acc:7458]	protein_coding	1007.64	982.972	1067.54	846.899	697.15	855.709	1019.39	799.919	-0.349773	0.00193214	0.000452602
ENSG00000143457	GOLPH3L	golgi phosphoprotein 3-like [Source:HGNC Symbol;Acc:24882]	protein_coding	5.92637	6.26474	6.31657	4.7789	4.61933	4.79281	6.16923	4.73035	-0.383144	0.00237542	9.53878e-06
ENSG00000169439	SDC2	syndecan 2 [Source:HGNC Symbol;Acc:10659]	protein_coding	12.4466	12.298	12.6526	14.0723	14.9301	14.23	12.4657	14.4108	0.209183	0.00234431	4.13273e-05
ENSG00000149679	CABLES2	Cdk5 and Abl enzyme substrate 2 [Source:HGNC Symbol;Acc:16143]	protein_coding	4.3168	4.19678	4.0116	3.23953	2.94578	3.13308	4.17506	3.10613	-0.426677	0.0023861	1.22717e-05
ENSG00000145685	LHFPL2	lipoma HMGIC fusion partner-like 2 [Source:HGNC Symbol;Acc:6588]	protein_coding	8.17555	7.99003	8.08136	6.79661	6.59549	6.28515	8.08231	6.55908	-0.301273	0.00227281	0.000130397
ENSG00000155366	RHOC	ras homolog family member C [Source:HGNC Symbol;Acc:669]	protein_coding	49.476	48.3969	53.9336	57.3701	57.0455	56.901	50.6022	57.1055	0.174432	0.00199056	0.000419144
ENSG00000059122	FLYWCH1	FLYWCH-type zinc finger 1 [Source:HGNC Symbol;Acc:25404]	protein_coding	11.1056	9.92242	10.2972	8.4147	7.98068	8.93996	10.4417	8.44511	-0.306174	0.00197654	0.000455436
ENSG00000187741	FANCA	Fanconi anemia, complementation group A [Source:HGNC Symbol;Acc:3582]	protein_coding	1.47381	1.49632	1.37432	1.75964	1.84063	1.79612	1.44815	1.7988	0.312822	0.00242978	8.93458e-06
ENSG00000145354	CISD2	CDGSH iron sulfur domain 2 [Source:HGNC Symbol;Acc:24212]	protein_coding	9.23408	8.24654	9.42728	7.11362	6.83865	6.72372	8.9693	6.892	-0.380074	0.00239382	5.02941e-05
ENSG00000094975	SUCO	SUN domain containing ossification factor [Source:HGNC Symbol;Acc:1240]	protein_coding	13.318	13.2792	13.8419	11.0271	11.1609	11.1186	13.4797	11.1022	-0.279945	0.00241298	5.77801e-05
ENSG00000105447	GRWD1	glutamate-rich WD repeat containing 1 [Source:HGNC Symbol;Acc:21270]	protein_coding	10.321	10.9577	10.4442	12.5932	12.1731	13.0393	10.5743	12.6019	0.253073	0.00244721	3.39551e-05
ENSG00000154721	JAM2	junctional adhesion molecule 2 [Source:HGNC Symbol;Acc:14686]	protein_coding	1.9714	1.66689	1.97819	1.35203	1.27773	1.40634	1.87216	1.34537	-0.476705	0.00245793	3.78186e-05
ENSG00000167657	DAPK3	death-associated protein kinase 3 [Source:HGNC Symbol;Acc:2676]	protein_coding	50.3077	46.4352	50.0176	56.3023	52.5084	57.5955	48.9202	55.4687	0.181245	0.00197654	0.000519299
ENSG00000183048	SLC25A10	solute carrier family 25 (mitochondrial carrier; dicarboxylate transporter), member 10 [Source:HGNC Symbol;Acc:10980]	protein_coding	17.1225	16.4532	17.9308	19.1834	19.4604	21.4267	17.1688	20.0235	0.221903	0.0023959	0.000113419
ENSG00000154920	EME1	essential meiotic endonuclease 1 homolog 1 (S. pombe) [Source:HGNC Symbol;Acc:24965]	protein_coding	1.22551	1.11118	1.31335	1.69554	1.79105	1.80582	1.21668	1.76414	0.536013	0.00251313	1.71164e-06
ENSG00000197063	MAFG	v-maf musculoaponeurotic fibrosarcoma oncogene homolog G (avian) [Source:HGNC Symbol;Acc:6781]	protein_coding	14.7894	13.8331	14.8793	12.282	11.8135	11.3706	14.5006	11.822	-0.29464	0.00227281	0.000248668
ENSG00000167995	BEST1	bestrophin 1 [Source:HGNC Symbol;Acc:12703]	protein_coding	0.940256	0.942806	1.01092	0.669527	0.574649	0.72892	0.96466	0.657699	-0.552594	0.00252555	7.69583e-06
ENSG00000162704	ARPC5	actin related protein 2/3 complex, subunit 5, 16kDa [Source:HGNC Symbol;Acc:708]	protein_coding	73.9995	71.9801	78.1321	83.6866	83.658	84.686	74.7039	84.0102	0.169381	0.00235367	0.000180675
ENSG00000049541	RFC2	replication factor C (activator 1) 2, 40kDa [Source:HGNC Symbol;Acc:9970]	protein_coding	6.15578	5.91899	6.88901	7.34096	8.07153	8.36061	6.32126	7.92437	0.326084	0.00249573	4.53345e-05
ENSG00000104885	DOT1L	DOT1-like, histone H3 methyltransferase (S. cerevisiae) [Source:HGNC Symbol;Acc:24948]	protein_coding	3.38122	3.15438	3.19606	3.75269	3.63512	4.03953	3.24389	3.80911	0.231732	0.00244721	9.97196e-05
ENSG00000114796	KLHL24	kelch-like 24 (Drosophila) [Source:HGNC Symbol;Acc:25947]	protein_coding	2.61001	2.69554	2.59158	1.85943	2.04891	1.94264	2.63238	1.95033	-0.432651	0.0025692	1.13911e-05
ENSG00000159023	EPB41	erythrocyte membrane protein band 4.1 (elliptocytosis 1, RH-linked) [Source:HGNC Symbol;Acc:3377]	protein_coding	2.76113	2.77863	2.91729	2.25067	2.1316	2.15225	2.81902	2.17817	-0.372076	0.00263917	1.12418e-05
ENSG00000136404	TM6SF1	transmembrane 6 superfamily member 1 [Source:HGNC Symbol;Acc:11860]	protein_coding	4.76954	4.47427	4.67619	3.3655	3.53569	3.27652	4.64	3.39257	-0.451746	0.00268835	5.63717e-06
ENSG00000132153	DHX30	DEAH (Asp-Glu-Ala-His) box polypeptide 30 [Source:HGNC Symbol;Acc:16716]	protein_coding	9.79845	9.08962	9.26503	10.7814	10.3985	10.9506	9.38436	10.7102	0.190649	0.00255695	0.000148551
ENSG00000138413	IDH1	isocitrate dehydrogenase 1 (NADP+), soluble [Source:HGNC Symbol;Acc:5382]	protein_coding	29.6356	28.8592	31.344	22.8486	24.6519	25.9585	29.9463	24.4863	-0.290401	0.00251313	0.000231541
ENSG00000141401	IMPA2	inositol(myo)-1(or 4)-monophosphatase 2 [Source:HGNC Symbol;Acc:6051]	protein_coding	4.90401	5.03571	5.4318	6.161	6.2745	7.28533	5.12384	6.57361	0.359461	0.00273749	1.97326e-05
ENSG00000212673	AL136115.1	HCG2032337; PRO1848; Protein 100507229 [Source:UniProtKB/TrEMBL;Acc:Q9UHT5]	protein_coding	0.910445	0.638933	0.854899	0.302689	0.301601	0.331959	0.801426	0.312083	-1.36064	0.0027626	1.47124e-06
ENSG00000113578	FGF1	fibroblast growth factor 1 (acidic) [Source:HGNC Symbol;Acc:3665]	protein_coding	3.14208	2.95939	3.15231	4.14501	4.42274	3.46918	3.08459	4.01231	0.379353	0.00272085	5.71948e-05
ENSG00000119922	IFIT2	interferon-induced protein with tetratricopeptide repeats 2 [Source:HGNC Symbol;Acc:5409]	protein_coding	1.46764	1.40552	1.48211	0.930938	0.935236	0.897402	1.45176	0.921192	-0.656225	0.00277648	2.12886e-06
ENSG00000180155	LYNX1	Ly6/neurotoxin 1 [Source:HGNC Symbol;Acc:29604]	protein_coding	2.8607	2.8773	2.71004	2.21377	2.09735	2.03817	2.81601	2.11643	-0.412021	0.00278109	1.92227e-05
ENSG00000133816	MICAL2	microtubule associated monoxygenase, calponin and LIM domain containing 2 [Source:HGNC Symbol;Acc:24693]	protein_coding	19.7818	21.3749	18.3539	23.785	23.1925	22.1437	19.8369	23.0404	0.215983	0.00169122	0.00110975
ENSG00000233137	RP11-220I1.1		lincRNA	13.8051	12.7281	13.3822	10.8855	10.9389	10.6031	13.3051	10.8092	-0.299724	0.002708	0.000106758
ENSG00000077514	POLD3	polymerase (DNA-directed), delta 3, accessory subunit [Source:HGNC Symbol;Acc:20932]	protein_coding	2.69464	2.41711	2.83566	3.18655	3.58735	3.17405	2.64914	3.31598	0.323913	0.00276833	7.59913e-05
ENSG00000183779	ZNF703	zinc finger protein 703 [Source:HGNC Symbol;Acc:25883]	protein_coding	18.9195	16.8492	17.091	20.0268	19.7733	24.4865	17.6199	21.4288	0.28235	0.00242978	0.000419144
ENSG00000168411	RFWD3	ring finger and WD repeat domain 3 [Source:HGNC Symbol;Acc:25539]	protein_coding	6.42263	6.01324	6.16517	7.17318	7.51297	7.26009	6.20035	7.31541	0.23859	0.00285368	2.47647e-05
ENSG00000214402	LCNL1	lipocalin-like 1 [Source:HGNC Symbol;Acc:34436]	protein_coding	0.800616	0.707182	0.857999	0.500355	0.440501	0.386357	0.788599	0.442404	-0.833926	0.00289953	3.74278e-06
ENSG00000153487	ING1	inhibitor of growth family, member 1 [Source:HGNC Symbol;Acc:6062]	protein_coding	2.99304	2.97347	3.1178	2.12251	2.18487	2.38481	3.0281	2.23073	-0.440901	0.00292164	1.02714e-05
ENSG00000261556	RP11-296I10.6		pseudogene	0.446931	0.444084	0.429636	0.202825	0.182282	0.143609	0.440217	0.176239	-1.32068	0.00298159	7.14953e-07
ENSG00000175567	UCP2	uncoupling protein 2 (mitochondrial, proton carrier) [Source:HGNC Symbol;Acc:12518]	protein_coding	3.56663	3.55006	3.22207	4.28846	4.10972	4.93814	3.44625	4.44544	0.367298	0.00294605	5.12681e-05
ENSG00000198018	ENTPD7	ectonucleoside triphosphate diphosphohydrolase 7 [Source:HGNC Symbol;Acc:19745]	protein_coding	5.34865	5.52535	5.00901	7.34297	7.33646	5.7529	5.29434	6.81078	0.363369	0.00261217	0.000390651
ENSG00000135451	TROAP	trophinin associated protein (tastin) [Source:HGNC Symbol;Acc:12327]	protein_coding	3.59554	2.97355	3.91605	4.35843	4.65526	4.647	3.49505	4.55356	0.381683	0.00298159	2.37659e-05
ENSG00000196150	ZNF250	zinc finger protein 250 [Source:HGNC Symbol;Acc:13044]	protein_coding	0.540365	0.590079	0.553382	0.786108	0.771588	0.788234	0.561276	0.781976	0.478416	0.00301192	3.1519e-06
ENSG00000002834	LASP1	LIM and SH3 protein 1 [Source:HGNC Symbol;Acc:6513]	protein_coding	151.713	154.081	151.628	169.066	170.564	170.351	152.474	169.994	0.15692	0.00283484	0.000201431
ENSG00000115109	EPB41L5	erythrocyte membrane protein band 4.1 like 5 [Source:HGNC Symbol;Acc:19819]	protein_coding	5.28425	5.5925	5.41746	6.34176	6.59893	6.00441	5.4314	6.31503	0.217466	0.00281211	0.000236136
ENSG00000159164	SV2A	synaptic vesicle glycoprotein 2A [Source:HGNC Symbol;Acc:20566]	protein_coding	16.654	16.9568	16.267	13.6463	13.2913	14.097	16.626	13.6782	-0.281559	0.00290655	0.000165979
ENSG00000138160	KIF11	kinesin family member 11 [Source:HGNC Symbol;Acc:6388]	protein_coding	7.82355	7.42484	7.84806	8.47031	9.4782	9.43022	7.69882	9.12624	0.245384	0.00303683	3.70113e-05
ENSG00000184254	ALDH1A3	aldehyde dehydrogenase 1 family, member A3 [Source:HGNC Symbol;Acc:409]	protein_coding	0.461381	0.45209	0.530932	0.237454	0.297876	0.288969	0.481468	0.274766	-0.809233	0.00309123	5.20781e-06
ENSG00000183762	KREMEN1	kringle containing transmembrane protein 1 [Source:HGNC Symbol;Acc:17550]	protein_coding	3.24946	3.19595	3.13138	2.61682	2.35994	2.46178	3.19227	2.47951	-0.364524	0.00307031	3.84418e-05
ENSG00000109654	TRIM2	tripartite motif containing 2 [Source:HGNC Symbol;Acc:15974]	protein_coding	6.87691	6.72932	6.32324	5.35325	5.38779	5.52954	6.64316	5.42353	-0.292637	0.00288454	0.00025664
ENSG00000170312	CDK1	cyclin-dependent kinase 1 [Source:HGNC Symbol;Acc:1722]	protein_coding	7.40405	6.63526	7.48131	8.00218	9.07523	8.76161	7.17354	8.61301	0.263832	0.00303683	0.000104942
ENSG00000165916	PSMC3	proteasome (prosome, macropain) 26S subunit, ATPase, 3 [Source:HGNC Symbol;Acc:9549]	protein_coding	63.7371	64.3676	67.3368	71.7503	73.701	75.2819	65.1472	73.5777	0.175567	0.00305691	0.000110576
ENSG00000115548	KDM3A	lysine (K)-specific demethylase 3A [Source:HGNC Symbol;Acc:20815]	protein_coding	2.86227	2.97547	2.96875	2.3766	2.41015	2.27325	2.9355	2.35334	-0.318899	0.00308328	9.45515e-05
ENSG00000137752	CASP1	caspase 1, apoptosis-related cysteine peptidase [Source:HGNC Symbol;Acc:1499]	protein_coding	11.553	11.58	13.2575	9.54924	9.77846	9.69621	12.1302	9.67464	-0.32632	0.0029735	0.000212409
ENSG00000160785	SLC25A44	solute carrier family 25, member 44 [Source:HGNC Symbol;Acc:29036]	protein_coding	4.21263	4.48602	4.17361	5.08768	4.81552	5.24435	4.29075	5.04918	0.23482	0.00304401	0.000169796
ENSG00000157741	UBN2	ubinuclein 2 [Source:HGNC Symbol;Acc:21931]	protein_coding	1.87401	1.95317	1.59458	1.37168	1.41496	1.34745	1.80725	1.37803	-0.391189	0.00287287	0.000347931
ENSG00000080839	RBL1	retinoblastoma-like 1 (p107) [Source:HGNC Symbol;Acc:9893]	protein_coding	2.26491	2.3369	2.36509	2.77626	3.04467	2.84616	2.3223	2.88903	0.315031	0.00323519	1.05594e-05
ENSG00000103426	CORO7	coronin 7 [Source:HGNC Symbol;Acc:26161]	protein_coding	5.96765	5.72401	5.91001	6.99163	6.72701	7.36408	5.86722	7.02757	0.260348	0.00323349	1.94776e-05
ENSG00000174371	EXO1	exonuclease 1 [Source:HGNC Symbol;Acc:3511]	protein_coding	1.93595	1.89806	1.73598	2.24871	2.47904	2.62711	1.85666	2.45162	0.401024	0.00323519	2.40607e-05
ENSG00000105376	ICAM5	intercellular adhesion molecule 5, telencephalin [Source:HGNC Symbol;Acc:5348]	protein_coding	7.29149	6.39847	6.52256	9.07908	7.45323	8.66697	6.73751	8.39976	0.318133	0.00306525	0.000221869
ENSG00000185129	PURA	purine-rich element binding protein A [Source:HGNC Symbol;Acc:9701]	protein_coding	3.82391	3.90066	3.56564	4.5925	4.83965	4.69953	3.7634	4.71056	0.323861	0.00327873	1.39052e-05
ENSG00000176087	SLC35A4	solute carrier family 35, member A4 [Source:HGNC Symbol;Acc:20753]	protein_coding	13.6928	13.8491	13.7253	15.5508	16.1526	15.8046	13.7557	15.836	0.203179	0.00324783	5.04543e-05
ENSG00000068366	ACSL4	acyl-CoA synthetase long-chain family member 4 [Source:HGNC Symbol;Acc:3571]	protein_coding	51.2809	51.4594	50.8821	42.7888	43.7447	42.7731	51.2075	43.1022	-0.248593	0.00298159	0.000317033
ENSG00000011347	SYT7	synaptotagmin VII [Source:HGNC Symbol;Acc:11514]	protein_coding	0.267133	0.198497	0.31409	0.114683	0.112438	0.115342	0.259906	0.114154	-1.18701	0.00330072	5.90011e-06
ENSG00000111087	GLI1	GLI family zinc finger 1 [Source:HGNC Symbol;Acc:4317]	protein_coding	0.94455	0.954528	0.923171	0.550505	0.563218	0.600333	0.94075	0.571352	-0.719432	0.00330524	2.44182e-06
ENSG00000107537	PHYH	phytanoyl-CoA 2-hydroxylase [Source:HGNC Symbol;Acc:8940]	protein_coding	8.99304	9.70728	10.4383	7.9424	7.48991	7.41667	9.71289	7.61633	-0.350805	0.00305703	0.000253576
ENSG00000173451	THAP2	THAP domain containing, apoptosis associated protein 2 [Source:HGNC Symbol;Acc:20854]	protein_coding	0.81376	0.805629	0.810167	0.557855	0.48711	0.509161	0.809852	0.518042	-0.644589	0.0033239	3.22991e-06
ENSG00000198888	MT-ND1	mitochondrially encoded NADH dehydrogenase 1 [Source:HGNC Symbol;Acc:7455]	protein_coding	1435.71	1446.87	1486.03	1242.39	1064.43	1210.51	1456.21	1172.44	-0.312695	0.00309539	0.000240166
ENSG00000103642	LACTB	lactamase, beta [Source:HGNC Symbol;Acc:16468]	protein_coding	9.41391	8.60681	9.90626	10.9029	11.3332	10.7967	9.30899	11.011	0.242242	0.00322063	0.000136483
ENSG00000138709	LARP1B	La ribonucleoprotein domain family, member 1B [Source:HGNC Symbol;Acc:24704]	protein_coding	3.21594	3.06769	3.49905	2.54131	2.62968	2.55846	3.26089	2.57649	-0.339863	0.00323349	0.000123973
ENSG00000008517	IL32	interleukin 32 [Source:HGNC Symbol;Acc:16830]	protein_coding	7.98385	7.92077	8.63268	10.0611	9.81464	9.28971	8.1791	9.72181	0.249282	0.00323519	0.000124108
ENSG00000237796	LINC00361	long intergenic non-protein coding RNA 361 [Source:HGNC Symbol;Acc:42681]	antisense	0.7826	0.639673	0.718879	1.77153	1.45485	1.27054	0.713717	1.49897	1.07055	0.0034095	4.50849e-06
ENSG00000114867	EIF4G1	eukaryotic translation initiation factor 4 gamma, 1 [Source:HGNC Symbol;Acc:3296]	protein_coding	67.4847	68.2164	64.9479	74.3817	74.6899	74.5357	66.883	74.5357	0.156292	0.00289714	0.000524433
ENSG00000156299	TIAM1	T-cell lymphoma invasion and metastasis 1 [Source:HGNC Symbol;Acc:11805]	protein_coding	0.419246	0.429691	0.37183	0.637102	0.554615	0.571152	0.406922	0.587623	0.530137	0.0034095	2.10248e-05
ENSG00000128294	TPST2	tyrosylprotein sulfotransferase 2 [Source:HGNC Symbol;Acc:12021]	protein_coding	12.591	11.9005	12.6334	14.8981	13.4512	14.5132	12.3749	14.2875	0.207334	0.00305691	0.000376536
ENSG00000186318	BACE1	beta-site APP-cleaving enzyme 1 [Source:HGNC Symbol;Acc:933]	protein_coding	9.99125	9.95995	9.33744	10.9478	11.3308	10.8703	9.76288	11.0496	0.178622	0.0029287	0.000509438
ENSG00000197324	LRP10	low density lipoprotein receptor-related protein 10 [Source:HGNC Symbol;Acc:14553]	protein_coding	43.5931	43.0533	43.0054	48.4653	48.0689	48.1105	43.2173	48.2149	0.157872	0.00325464	0.000203223
ENSG00000105401	CDC37	cell division cycle 37 homolog (S. cerevisiae) [Source:HGNC Symbol;Acc:1735]	protein_coding	137.935	134.076	147.37	156.765	152.998	160.206	139.794	156.656	0.164302	0.0029343	0.000524433
ENSG00000042753	AP2S1	adaptor-related protein complex 2, sigma 1 subunit [Source:HGNC Symbol;Acc:565]	protein_coding	103.562	108.207	114.76	120.177	123.308	136.277	108.843	126.587	0.217882	0.00329865	0.000191278
ENSG00000132507	EIF5A	eukaryotic translation initiation factor 5A [Source:HGNC Symbol;Acc:3300]	protein_coding	106.526	100.387	110.456	117.241	116.465	131.11	105.79	121.605	0.201005	0.00325464	0.000243427
ENSG00000186480	INSIG1	insulin induced gene 1 [Source:HGNC Symbol;Acc:6083]	protein_coding	43.2546	40.6374	43.4066	35.5723	36.1566	34.4331	42.4329	35.3874	-0.261949	0.00306525	0.000433254
ENSG00000165572	KBTBD6	kelch repeat and BTB (POZ) domain containing 6 [Source:HGNC Symbol;Acc:25340]	protein_coding	2.30337	2.35052	2.35279	3.06847	3.16702	2.69985	2.33556	2.97845	0.350791	0.00349486	3.15391e-05
ENSG00000111276	CDKN1B	cyclin-dependent kinase inhibitor 1B (p27, Kip1) [Source:HGNC Symbol;Acc:1785]	protein_coding	7.72776	7.18827	7.64938	8.87582	9.33609	8.8815	7.5218	9.03114	0.263829	0.00354214	1.79066e-05
ENSG00000172731	LRRC20	leucine rich repeat containing 20 [Source:HGNC Symbol;Acc:23421]	protein_coding	5.56832	5.58843	5.79033	4.50859	4.39528	4.09617	5.64903	4.33335	-0.382522	0.00354207	3.27484e-05
ENSG00000117594	HSD11B1	hydroxysteroid (11-beta) dehydrogenase 1 [Source:HGNC Symbol;Acc:5208]	protein_coding	2.95956	2.72957	2.79517	1.74887	1.68139	1.81782	2.8281	1.74936	-0.693005	0.00360387	2.43632e-06
ENSG00000103145	HCFC1R1	host cell factor C1 regulator 1 (XPO1 dependent) [Source:HGNC Symbol;Acc:21198]	protein_coding	35.0808	30.3979	33.9189	26.605	24.8772	27.3279	33.1325	26.27	-0.334831	0.00323519	0.000371831
ENSG00000196700	ZNF512B	zinc finger protein 512B [Source:HGNC Symbol;Acc:29212]	protein_coding	11.6745	11.6535	11.4521	13.5102	12.5821	13.4679	11.5934	13.1868	0.18579	0.00333563	0.00029875
ENSG00000136485	DCAF7	DDB1 and CUL4 associated factor 7 [Source:HGNC Symbol;Acc:30915]	protein_coding	17.0868	18.0894	17.1722	19.623	19.6335	19.9232	17.4495	19.7266	0.176958	0.00334722	0.000297891
ENSG00000212725	KRTAP2-1	keratin associated protein 2-1 [Source:HGNC Symbol;Acc:16775]	protein_coding	1.27056	0.989784	1.35535	2.45272	2.37202	2.26517	1.20523	2.3633	0.971499	0.0037225	1.73805e-06
ENSG00000173145	NOC3L	nucleolar complex associated 3 homolog (S. cerevisiae) [Source:HGNC Symbol;Acc:24034]	protein_coding	6.02062	5.8755	6.27153	7.12686	7.50886	6.79751	6.05588	7.14441	0.238477	0.0035985	0.000138789
ENSG00000164291	ARSK	arylsulfatase family, member K [Source:HGNC Symbol;Acc:25239]	protein_coding	6.66472	6.29309	7.00245	7.9319	7.8095	7.74171	6.65342	7.8277	0.234493	0.00367102	6.97703e-05
ENSG00000070081	NUCB2	nucleobindin 2 [Source:HGNC Symbol;Acc:8044]	protein_coding	20.2603	20.4597	21.9446	16.891	18.2082	16.7984	20.8882	17.2992	-0.271983	0.00306525	0.000684717
ENSG00000172757	CFL1	cofilin 1 (non-muscle) [Source:HGNC Symbol;Acc:1874]	protein_coding	151.136	149.797	160.651	168.372	167.943	177.971	153.861	171.429	0.155981	0.00320699	0.000547089
ENSG00000010539	ZNF200	zinc finger protein 200 [Source:HGNC Symbol;Acc:12993]	protein_coding	1.42631	1.41365	1.52587	2.00263	1.9752	1.99774	1.45528	1.99186	0.452822	0.00376312	3.85933e-06
ENSG00000167470	MIDN	midnolin [Source:HGNC Symbol;Acc:16298]	protein_coding	20.5347	18.2938	19.1865	23.9579	20.251	25.2622	19.3383	23.157	0.259988	0.00306525	0.000715916
ENSG00000105327	BBC3	BCL2 binding component 3 [Source:HGNC Symbol;Acc:17868]	protein_coding	4.12932	3.356	3.48631	2.49838	2.35627	2.70064	3.65721	2.51843	-0.538218	0.00370885	7.90375e-05
ENSG00000099849	RASSF7	Ras association (RalGDS/AF-6) domain family (N-terminal) member 7 [Source:HGNC Symbol;Acc:1166]	protein_coding	1.93994	1.55293	1.75854	2.39093	2.24949	2.75534	1.75047	2.46525	0.493992	0.00381531	6.30228e-05
ENSG00000111667	USP5	ubiquitin specific peptidase 5 (isopeptidase T) [Source:HGNC Symbol;Acc:12628]	protein_coding	27.0826	27.5181	27.0346	30.667	29.941	31.6533	27.2118	30.7538	0.176531	0.00371747	0.000165979
ENSG00000147383	NSDHL	NAD(P) dependent steroid dehydrogenase-like [Source:HGNC Symbol;Acc:13398]	protein_coding	18.8503	18.7519	19.5842	15.3399	14.9786	15.6178	19.0621	15.3121	-0.316037	0.00389984	4.53711e-05
ENSG00000135365	PHF21A	PHD finger protein 21A [Source:HGNC Symbol;Acc:24156]	protein_coding	4.42251	4.25741	3.91187	3.34111	3.34943	3.47364	4.19726	3.38806	-0.308989	0.0035714	0.000397185
ENSG00000218418	RP11-296E7.1		pseudogene	5.54707	5.72731	5.95982	4.52638	4.68319	4.17717	5.74473	4.46224	-0.364471	0.00384604	0.000126185
ENSG00000132530	XAF1	XIAP associated factor 1 [Source:HGNC Symbol;Acc:30932]	protein_coding	1.23352	1.0838	1.27089	0.824057	0.635839	0.77012	1.19607	0.743339	-0.686212	0.00396228	1.28696e-05
ENSG00000254615	RP11-395G23.3		lincRNA	7.62848	7.05829	7.97759	5.05753	5.29998	5.57412	7.55479	5.31054	-0.508531	0.00408408	1.6249e-05
ENSG00000187109	NAP1L1	nucleosome assembly protein 1-like 1 [Source:HGNC Symbol;Acc:7637]	protein_coding	56.1046	54.9266	60.1048	47.4485	47.2324	49.9142	57.0453	48.1984	-0.243125	0.00283182	0.00129925
ENSG00000095397	DFNB31	deafness, autosomal recessive 31 [Source:HGNC Symbol;Acc:16361]	protein_coding	1.17073	1.20468	1.13867	0.80259	0.764915	0.797889	1.17136	0.788465	-0.571064	0.00413354	7.25731e-06
ENSG00000120519	SLC10A7	solute carrier family 10 (sodium/bile acid cotransporter family), member 7 [Source:HGNC Symbol;Acc:23088]	protein_coding	1.56791	1.52252	1.49699	1.09406	1.1374	1.07908	1.52914	1.10351	-0.470618	0.00414963	9.27969e-06
ENSG00000162004	CCDC78	coiled-coil domain containing 78 [Source:HGNC Symbol;Acc:14153]	protein_coding	1.41116	1.31073	1.43012	0.952843	0.753217	0.973569	1.384	0.89321	-0.631776	0.00416542	1.13772e-05
ENSG00000143641	GALNT2	UDP-N-acetyl-alpha-D-galactosamine:polypeptide N-acetylgalactosaminyltransferase 2 (GalNAc-T2) [Source:HGNC Symbol;Acc:4124]	protein_coding	36.2289	37.2203	35.6732	40.4701	39.5273	41.8167	36.3741	40.6047	0.158733	0.00354207	0.000644522
ENSG00000188486	H2AFX	H2A histone family, member X [Source:HGNC Symbol;Acc:4739]	protein_coding	23.9423	20.9571	22.8979	24.9181	26.9388	31.4812	22.5991	27.7794	0.297748	0.00395653	0.000257325
ENSG00000157483	MYO1E	myosin IE [Source:HGNC Symbol;Acc:7599]	protein_coding	6.47521	6.70987	6.26986	7.60585	7.55947	7.28703	6.48498	7.48412	0.20673	0.00396228	0.000304975
ENSG00000074416	MGLL	monoglyceride lipase [Source:HGNC Symbol;Acc:17038]	protein_coding	32.1524	32.7313	30.5474	38.3901	36.1402	34.4584	31.8104	36.3295	0.191645	0.00323113	0.00103926
ENSG00000157796	WDR19	WD repeat domain 19 [Source:HGNC Symbol;Acc:18340]	protein_coding	4.49339	4.93575	4.19335	3.54281	3.61655	3.22119	4.54083	3.46018	-0.392107	0.00413354	0.000140009
ENSG00000145476	CYP4V2	cytochrome P450, family 4, subfamily V, polypeptide 2 [Source:HGNC Symbol;Acc:23198]	protein_coding	1.2932	1.33362	1.27722	0.974007	0.952093	0.962808	1.30134	0.962969	-0.43444	0.00426934	1.05596e-05
ENSG00000182261	NLRP10	NLR family, pyrin domain containing 10 [Source:HGNC Symbol;Acc:21464]	protein_coding	0.980158	0.933742	0.773378	1.41409	1.80712	1.25878	0.895759	1.49333	0.737349	0.00426934	2.25227e-05
ENSG00000244161	FLNB-AS1	FLNB antisense RNA 1 [Source:HGNC Symbol;Acc:40239]	antisense	1.04616	1.08321	0.87433	0.635872	0.503795	0.651642	1.00123	0.597103	-0.745722	0.00428098	2.42768e-05
ENSG00000116574	RHOU	ras homolog family member U [Source:HGNC Symbol;Acc:17794]	protein_coding	0.829313	0.837858	0.828611	0.435341	0.554977	0.527694	0.831927	0.506004	-0.717308	0.00431596	9.35163e-06
ENSG00000023909	GCLM	glutamate-cysteine ligase, modifier subunit [Source:HGNC Symbol;Acc:4312]	protein_coding	10.4517	9.88373	10.041	11.0871	11.6196	12.2505	10.1255	11.6524	0.202636	0.00414963	0.000176628
ENSG00000100311	PDGFB	platelet-derived growth factor beta polypeptide [Source:HGNC Symbol;Acc:8800]	protein_coding	0.96404	0.824736	0.908849	1.27066	1.37926	1.29987	0.899209	1.3166	0.550087	0.0043259	5.74211e-06
ENSG00000189319	FAM53B	family with sequence similarity 53, member B [Source:HGNC Symbol;Acc:28968]	protein_coding	1.97048	1.68308	1.80094	1.35903	1.28072	1.34248	1.81816	1.32741	-0.453871	0.00429366	3.95901e-05
ENSG00000204520	MICA	MHC class I polypeptide-related sequence A [Source:HGNC Symbol;Acc:7090]	protein_coding	15.8485	16.2774	18.8721	19.9163	20.3803	19.7337	16.9993	20.0101	0.235251	0.004074	0.000293413
ENSG00000143079	CTTNBP2NL	CTTNBP2 N-terminal like [Source:HGNC Symbol;Acc:25330]	protein_coding	8.99645	9.28241	8.89585	10.2574	10.8583	10.0991	9.05824	10.4049	0.199964	0.00404659	0.000320957
ENSG00000162804	SNED1	sushi, nidogen and EGF-like domains 1 [Source:HGNC Symbol;Acc:24696]	protein_coding	1.89772	1.92131	1.63573	1.37596	1.37681	1.44075	1.81825	1.39784	-0.379349	0.0041513	0.000220621
ENSG00000136816	TOR1B	torsin family 1, member B (torsin B) [Source:HGNC Symbol;Acc:11995]	protein_coding	12.0183	11.7718	11.9129	13.5102	13.3554	14.8318	11.901	13.8991	0.223908	0.0042576	0.000121584
ENSG00000134717	BTF3L4	basic transcription factor 3-like 4 [Source:HGNC Symbol;Acc:30547]	protein_coding	9.02599	9.12433	10.154	7.50298	8.07222	7.51166	9.43478	7.69562	-0.293951	0.00331492	0.00106743
ENSG00000013016	EHD3	EH-domain containing 3 [Source:HGNC Symbol;Acc:3244]	protein_coding	24.8975	26.0325	24.0485	20.6798	20.6737	21.1458	24.9928	20.8331	-0.262636	0.00356474	0.000834107
ENSG00000173546	CSPG4	chondroitin sulfate proteoglycan 4 [Source:HGNC Symbol;Acc:2466]	protein_coding	27.3391	25.8673	24.1651	30.5306	28.9859	28.373	25.7905	29.2965	0.183889	0.00241372	0.00199215
ENSG00000180354	C7orf41	chromosome 7 open reading frame 41 [Source:HGNC Symbol;Acc:25457]	protein_coding	2.43454	2.82207	2.71489	1.9605	2.13908	1.98883	2.65717	2.02947	-0.388784	0.00412555	0.000287067
ENSG00000010292	NCAPD2	non-SMC condensin I complex, subunit D2 [Source:HGNC Symbol;Acc:24305]	protein_coding	12.4582	12.6553	11.6239	13.6018	13.9296	14.2259	12.2458	13.9191	0.184775	0.004074	0.000482807
ENSG00000147421	HMBOX1	homeobox containing 1 [Source:HGNC Symbol;Acc:26137]	protein_coding	2.8825	2.908	2.31682	1.989	2.05369	1.91735	2.70244	1.98668	-0.443901	0.00412052	0.000452168
ENSG00000026508	CD44	CD44 molecule (Indian blood group) [Source:HGNC Symbol;Acc:1681]	protein_coding	223.308	227.318	221.072	241.677	252.35	251.815	223.899	248.614	0.15106	0.00413375	0.000473267
ENSG00000125484	GTF3C4	general transcription factor IIIC, polypeptide 4, 90kDa [Source:HGNC Symbol;Acc:4667]	protein_coding	4.1009	4.12918	3.79607	4.57551	4.8389	4.58614	4.00872	4.66685	0.219308	0.00432045	0.000320957
ENSG00000188785	ZNF548	zinc finger protein 548 [Source:HGNC Symbol;Acc:26561]	protein_coding	2.32173	2.33186	2.38321	1.71492	1.76607	1.63656	2.3456	1.70585	-0.459467	0.00470133	1.23896e-05
ENSG00000166073	GPR176	G protein-coupled receptor 176 [Source:HGNC Symbol;Acc:32370]	protein_coding	35.6756	35.8142	34.7284	38.5877	40.9921	39.5587	35.4061	39.7128	0.165608	0.00432187	0.000428371
ENSG00000114346	ECT2	epithelial cell transforming sequence 2 oncogene [Source:HGNC Symbol;Acc:3155]	protein_coding	8.21872	7.97759	8.71304	9.69887	10.6049	9.28494	8.30311	9.8629	0.24836	0.00466024	9.75508e-05
ENSG00000078401	EDN1	endothelin 1 [Source:HGNC Symbol;Acc:3176]	protein_coding	11.0292	9.85193	11.2377	7.82548	8.95802	8.29496	10.7063	8.35949	-0.356974	0.00432045	0.000453101
ENSG00000261819	RP11-680G24.4		pseudogene	5.08343	5.43609	4.85385	6.39571	6.39311	6.74357	5.12445	6.5108	0.345436	0.00477123	2.63713e-05
ENSG00000122862	SRGN	serglycin [Source:HGNC Symbol;Acc:9361]	protein_coding	15.9285	14.3348	16.5952	18.8737	18.1737	19.2031	15.6195	18.7502	0.263557	0.00470133	0.000102879
ENSG00000184009	ACTG1	actin, gamma 1 [Source:HGNC Symbol;Acc:144]	protein_coding	2296.36	2219.77	2355.05	2565.58	2505.63	2519.54	2290.39	2530.25	0.143685	0.00413354	0.00067233
ENSG00000151640	DPYSL4	dihydropyrimidinase-like 4 [Source:HGNC Symbol;Acc:3016]	protein_coding	3.74175	3.38202	3.77895	4.4687	4.44534	4.71651	3.63424	4.54352	0.322157	0.00479005	1.89636e-05
ENSG00000152443	ZNF776	zinc finger protein 776 [Source:HGNC Symbol;Acc:26765]	protein_coding	2.11105	2.03621	1.84859	2.47851	2.63941	2.40396	1.99862	2.50729	0.327127	0.00471955	0.000102137
ENSG00000179152	TCAIM	T cell activation inhibitor, mitochondrial [Source:HGNC Symbol;Acc:25241]	protein_coding	4.70228	4.52259	4.73393	3.89738	3.66447	3.64151	4.65294	3.73445	-0.317245	0.0047042	0.000129045
ENSG00000167994	RAB3IL1	RAB3A interacting protein (rabin3)-like 1 [Source:HGNC Symbol;Acc:9780]	protein_coding	3.63968	3.37081	3.71265	2.82862	2.44935	2.41212	3.57438	2.56336	-0.479655	0.00477377	5.99667e-05
ENSG00000229373	LINC00452	long intergenic non-protein coding RNA 452 [Source:HGNC Symbol;Acc:42800]	lincRNA	0.976062	0.906593	0.98963	1.42553	1.33229	1.43131	0.957428	1.39638	0.544451	0.00483358	6.26957e-06
ENSG00000132952	USPL1	ubiquitin specific peptidase like 1 [Source:HGNC Symbol;Acc:20294]	protein_coding	5.47461	4.84283	5.69488	6.36967	6.49367	6.26128	5.33744	6.37487	0.256249	0.00476076	0.000192984
ENSG00000196139	AKR1C3	aldo-keto reductase family 1, member C3 (3-alpha hydroxysteroid dehydrogenase, type II) [Source:HGNC Symbol;Acc:386]	protein_coding	0.883469	0.781515	0.879162	0.431003	0.461131	0.508615	0.848048	0.466917	-0.860982	0.00495482	4.95521e-06
ENSG00000260627				40.9339	40.4717	42.1978	45.8395	45.7164	49.326	41.2011	46.9606	0.188768	0.00482252	0.000163811
ENSG00000175175	PPM1E	protein phosphatase, Mg2+/Mn2+ dependent, 1E [Source:HGNC Symbol;Acc:19322]	protein_coding	0.15876	0.129586	0.16351	0.043811	0.0590605	0.0623171	0.150619	0.0550629	-1.45175	0.00499842	5.3883e-06
ENSG00000168101	NUDT16L1	nudix (nucleoside diphosphate linked moiety X)-type motif 16-like 1 [Source:HGNC Symbol;Acc:28154]	protein_coding	8.92013	8.54239	9.67719	10.5742	10.3438	11.8334	9.04657	10.9171	0.271152	0.00481468	0.000230796
ENSG00000116774	OLFML3	olfactomedin-like 3 [Source:HGNC Symbol;Acc:24956]	protein_coding	45.4676	47.2921	50.098	39.8327	39.4882	39.7245	47.6192	39.6818	-0.263067	0.00432441	0.000730289
ENSG00000176788	BASP1	brain abundant, membrane attached signal protein 1 [Source:HGNC Symbol;Acc:957]	protein_coding	109.285	103.158	109.067	114.193	121.982	124.573	107.17	120.249	0.166125	0.00459336	0.000470244
ENSG00000031081	ARHGAP31	Rho GTPase activating protein 31 [Source:HGNC Symbol;Acc:29216]	protein_coding	3.44349	3.17323	2.89226	3.69274	3.96167	3.7551	3.16966	3.80317	0.262875	0.00482201	0.000248668
ENSG00000152749	GPR180	G protein-coupled receptor 180 [Source:HGNC Symbol;Acc:28899]	protein_coding	5.14819	5.06307	5.28537	4.20236	4.25198	4.14376	5.16554	4.19937	-0.298749	0.00499842	9.06174e-05
ENSG00000090889	KIF4A	kinesin family member 4A [Source:HGNC Symbol;Acc:13339]	protein_coding	5.32663	5.74187	5.59191	6.21565	6.90292	6.64678	5.55347	6.58845	0.24655	0.00493961	0.000165486
ENSG00000139946	PELI2	pellino E3 ubiquitin protein ligase family member 2 [Source:HGNC Symbol;Acc:8828]	protein_coding	2.45705	2.33394	2.28957	1.70699	1.83914	1.81993	2.36018	1.78869	-0.399999	0.00510608	3.86449e-05
ENSG00000135679	MDM2	Mdm2, p53 E3 ubiquitin protein ligase homolog (mouse) [Source:HGNC Symbol;Acc:6973]	protein_coding	12.6119	11.0964	12.4252	9.94227	9.74664	10.1969	12.0445	9.96193	-0.273875	0.00426951	0.000899284
ENSG00000185164	NOMO2	NODAL modulator 2 [Source:HGNC Symbol;Acc:22652]	protein_coding	48.3357	50.9452	47.4248	54.6955	55.185	53.9287	48.9019	54.6031	0.159092	0.00370885	0.00146462
ENSG00000153666	GOLGA8IP	golgin A8 family, member I, pseudogene [Source:HGNC Symbol;Acc:26660]	protein_coding	2.55415	2.16082	2.66997	1.83777	1.7832	1.8638	2.46165	1.82826	-0.429156	0.00507308	0.000157948
ENSG00000116525	TRIM62	tripartite motif containing 62 [Source:HGNC Symbol;Acc:25574]	protein_coding	4.39872	4.15238	4.13589	4.87605	5.11022	5.41859	4.229	5.13496	0.280036	0.00529114	3.83945e-05
ENSG00000125445	MRPS7	mitochondrial ribosomal protein S7 [Source:HGNC Symbol;Acc:14499]	protein_coding	25.3494	24.7152	25.9301	28.662	29.4079	30.3205	25.3316	29.4635	0.217992	0.00528826	4.49397e-05
ENSG00000196924	FLNA	filamin A, alpha [Source:HGNC Symbol;Acc:3754]	protein_coding	412.727	424.029	348.996	477.733	455.491	446.128	395.251	459.784	0.218188	0.00120772	0.00419618
ENSG00000258890	CEP95	centrosomal protein 95kDa [Source:HGNC Symbol;Acc:25141]	protein_coding	6.61789	6.59431	6.45833	4.59571	4.45543	5.45739	6.55684	4.83618	-0.439134	0.00541109	1.96245e-05
ENSG00000114353	GNAI2	guanine nucleotide binding protein (G protein), alpha inhibiting activity polypeptide 2 [Source:HGNC Symbol;Acc:4385]	protein_coding	66.7362	67.0915	65.8928	73.466	71.9542	76.0841	66.5735	73.8347	0.149352	0.00483358	0.000618068
ENSG00000082497	SERTAD4	SERTA domain containing 4 [Source:HGNC Symbol;Acc:25236]	protein_coding	0.221069	0.1513	0.14963	0.374635	0.300981	0.311477	0.174	0.329031	0.91914	0.00544471	1.5739e-05
ENSG00000087111	PIGS	phosphatidylinositol glycan anchor biosynthesis, class S [Source:HGNC Symbol;Acc:14937]	protein_coding	18.6022	18.6875	19.4124	21.4014	20.9071	21.5747	18.9007	21.2944	0.172033	0.00528826	0.000193111
ENSG00000132561	MATN2	matrilin 2 [Source:HGNC Symbol;Acc:6908]	protein_coding	6.41508	6.54201	6.0486	5.0408	5.20711	5.21111	6.33523	5.15301	-0.297982	0.00513503	0.000363893
ENSG00000180901	KCTD2	potassium channel tetramerisation domain containing 2 [Source:HGNC Symbol;Acc:21294]	protein_coding	6.99604	6.81783	6.71887	8.04913	7.88534	8.25592	6.84425	8.06346	0.236508	0.00546968	4.05346e-05
ENSG00000109787	KLF3	Kruppel-like factor 3 (basic) [Source:HGNC Symbol;Acc:16516]	protein_coding	8.13178	8.4303	8.49965	6.93877	6.80289	6.74309	8.35391	6.82825	-0.290936	0.00535453	0.000205974
ENSG00000100258	LMF2	lipase maturation factor 2 [Source:HGNC Symbol;Acc:25096]	protein_coding	37.6588	33.5713	36.9782	40.4043	38.8786	42.6307	36.0694	40.6379	0.172048	0.00395689	0.00162032
ENSG00000139174	PRICKLE1	prickle homolog 1 (Drosophila) [Source:HGNC Symbol;Acc:17019]	protein_coding	1.85289	2.21517	1.96603	2.63326	2.49882	2.55589	2.01136	2.56266	0.349466	0.00552099	7.86504e-05
ENSG00000140950	KIAA1609	KIAA1609 [Source:HGNC Symbol;Acc:29325]	protein_coding	6.11651	5.86284	5.95982	6.92044	6.69684	7.0848	5.97972	6.90069	0.206663	0.00555542	9.80429e-05
ENSG00000134490	TMEM241	transmembrane protein 241 [Source:HGNC Symbol;Acc:31723]	protein_coding	3.01309	2.97745	2.79851	2.11237	2.12839	2.2189	2.92968	2.15322	-0.44425	0.00567462	2.44757e-05
ENSG00000122176	FMOD	fibromodulin [Source:HGNC Symbol;Acc:3774]	protein_coding	3.62881	4.26221	3.81835	2.67266	3.1147	2.56994	3.90312	2.78577	-0.486554	0.00557567	0.000132137
ENSG00000185291	IL3RA	interleukin 3 receptor, alpha (low affinity) [Source:HGNC Symbol;Acc:6012]	protein_coding	1.11858	0.883121	1.0275	0.472942	0.425041	0.547373	1.00973	0.481785	-1.06751	0.00570422	6.17101e-06
ENSG00000137193	PIM1	pim-1 oncogene [Source:HGNC Symbol;Acc:8986]	protein_coding	18.2368	18.6158	19.0189	15.4762	15.2608	15.0473	18.6238	15.2614	-0.287259	0.00557077	0.000197052
ENSG00000115762	PLEKHB2	pleckstrin homology domain containing, family B (evectins) member 2 [Source:HGNC Symbol;Acc:19236]	protein_coding	22.7178	23.2132	23.2892	26.0235	26.1245	25.2015	23.0734	25.7831	0.160199	0.00528417	0.000528829
ENSG00000051180	RAD51	RAD51 homolog (S. cerevisiae) [Source:HGNC Symbol;Acc:9817]	protein_coding	2.01059	1.95984	2.1919	2.52225	2.75114	3.03367	2.05411	2.76902	0.430861	0.00579844	4.05396e-05
ENSG00000007968	E2F2	E2F transcription factor 2 [Source:HGNC Symbol;Acc:3114]	protein_coding	0.384666	0.373529	0.289101	0.542131	0.572401	0.578798	0.349098	0.564443	0.693195	0.00584926	8.06552e-06
ENSG00000122861	PLAU	plasminogen activator, urokinase [Source:HGNC Symbol;Acc:9052]	protein_coding	330.26	331.152	350.136	286.791	289.119	284.453	337.182	286.788	-0.233547	0.004819	0.0011466
ENSG00000167930	ITFG3	integrin alpha FG-GAP repeat containing 3 [Source:HGNC Symbol;Acc:14163]	protein_coding	18.7918	18.0616	17.6526	21.1295	19.5338	20.5683	18.1687	20.4105	0.167859	0.00463796	0.00135703
ENSG00000183671	GPR1	G protein-coupled receptor 1 [Source:HGNC Symbol;Acc:4463]	protein_coding	0.662134	0.312716	0.608221	0.2482	0.157455	0.232592	0.52769	0.212749	-1.31054	0.00588873	0.000113541
ENSG00000130958	SLC35D2	solute carrier family 35, member D2 [Source:HGNC Symbol;Acc:20799]	protein_coding	11.4197	10.9824	12.3598	9.09979	9.24154	9.17586	11.5873	9.1724	-0.337175	0.00588422	0.000127955
ENSG00000182197	EXT1	exostosin 1 [Source:HGNC Symbol;Acc:3512]	protein_coding	35.8163	37.9051	35.7566	40.3276	40.0432	41.5129	36.4927	40.6279	0.154865	0.00475203	0.00127364
ENSG00000131051	RBM39	RNA binding motif protein 39 [Source:HGNC Symbol;Acc:15923]	protein_coding	26.3679	26.6497	28.5749	22.8177	22.9898	23.1597	27.1975	22.989	-0.242527	0.00482201	0.00120887
ENSG00000023445	BIRC3	baculoviral IAP repeat containing 3 [Source:HGNC Symbol;Acc:591]	protein_coding	0.582211	0.568405	0.484058	0.798888	0.767661	0.715623	0.544891	0.760724	0.481405	0.00597073	6.89388e-05
ENSG00000177731	FLII	flightless I homolog (Drosophila) [Source:HGNC Symbol;Acc:3750]	protein_coding	48.4876	48.7231	45.7783	53.5111	51.601	53.9643	47.663	53.0255	0.153816	0.00441834	0.00170944
ENSG00000108671	PSMD11	proteasome (prosome, macropain) 26S subunit, non-ATPase, 11 [Source:HGNC Symbol;Acc:9556]	protein_coding	20.7162	20.557	21.4289	22.8499	23.3648	24.4669	20.9007	23.5605	0.172824	0.00595013	0.000203341
ENSG00000234741	GAS5	growth arrest-specific 5 (non-protein coding) [Source:HGNC Symbol;Acc:16355]	processed_transcript	49.5161	51.6138	56.8615	40.9775	44.7257	44.7719	52.6638	43.4917	-0.276072	0.00435817	0.00183978
ENSG00000127589	TUBBP1	tubulin, beta pseudogene 1 [Source:HGNC Symbol;Acc:12414]	pseudogene	89.6372	94.313	93.1125	101.568	105.237	103.57	92.3542	103.458	0.163801	0.00573299	0.000472614
ENSG00000214222	TUBBP2	tubulin, beta pseudogene 2 [Source:HGNC Symbol;Acc:12415]	pseudogene	57.5738	60.5919	65.5388	67.5008	75.1177	75.7132	61.2348	72.7772	0.249134	0.00587688	0.00039344
ENSG00000157404	KIT	v-kit Hardy-Zuckerman 4 feline sarcoma viral oncogene homolog [Source:HGNC Symbol;Acc:6342]	protein_coding	6.17714	5.84886	5.57455	6.86635	7.27392	6.51258	5.86685	6.88428	0.23072	0.00571573	0.000572062
ENSG00000215158	RP11-1023L17.1		pseudogene	1.19184	0.932929	1.16985	0.812772	0.729047	0.705514	1.09821	0.749111	-0.551897	0.00612311	0.000218204
ENSG00000214114	MYCBP	c-myc binding protein [Source:HGNC Symbol;Acc:7554]	protein_coding	1.1733	1.05643	1.24273	1.39401	1.82674	1.63354	1.15749	1.6181	0.483297	0.006291	6.28176e-05
ENSG00000132436	FIGNL1	fidgetin-like 1 [Source:HGNC Symbol;Acc:13286]	protein_coding	2.91004	2.60746	2.89143	3.33869	3.61642	3.35064	2.80298	3.43525	0.293454	0.00644468	7.74698e-05
ENSG00000130985	UBA1	ubiquitin-like modifier activating enzyme 1 [Source:HGNC Symbol;Acc:12469]	protein_coding	64.8549	65.379	63.4774	71.6485	69.7295	73.1155	64.5704	71.4978	0.147025	0.00571573	0.000926126
ENSG00000141076	CIRH1A	cirrhosis, autosomal recessive 1A (cirhin) [Source:HGNC Symbol;Acc:1983]	protein_coding	7.97921	8.27067	8.37428	9.27268	9.39459	9.64871	8.20805	9.43866	0.201542	0.00652039	0.000126185
ENSG00000131981	LGALS3	lectin, galactoside-binding, soluble, 3 [Source:HGNC Symbol;Acc:6563]	protein_coding	43.6164	42.2626	45.6183	37.1965	36.2457	37.6844	43.8324	37.0422	-0.242829	0.00574183	0.000927887
ENSG00000213417	KRTAP2-4	keratin associated protein 2-4 [Source:HGNC Symbol;Acc:18891]	protein_coding	0.958731	0.851779	0.957249	1.87088	1.79105	2.12379	0.922587	1.92857	1.06378	0.00667032	4.68386e-06
ENSG00000085840	ORC1	origin recognition complex, subunit 1 [Source:HGNC Symbol;Acc:8487]	protein_coding	1.2996	1.41296	1.5732	1.76934	2.3852	2.11405	1.42859	2.08953	0.54859	0.00661749	6.06088e-05
ENSG00000101447	FAM83D	family with sequence similarity 83, member D [Source:HGNC Symbol;Acc:16122]	protein_coding	6.49453	6.68904	7.84205	8.0913	9.16245	8.96662	7.00854	8.74012	0.318539	0.00666089	0.000143027
ENSG00000226415	TPI1P1	triosephosphate isomerase 1 pseudogene 1 [Source:HGNC Symbol;Acc:35449]	pseudogene	44.3996	52.3471	51.7694	56.6856	63.6246	65.1109	49.5054	61.807	0.320186	0.00681516	2.42768e-05
ENSG00000148120	C9orf3	chromosome 9 open reading frame 3 [Source:HGNC Symbol;Acc:1361]	protein_coding	1.43974	1.46377	1.45272	1.72115	1.67925	1.86014	1.45208	1.75351	0.272132	0.00679817	5.51062e-05
ENSG00000011009	LYPLA2	lysophospholipase II [Source:HGNC Symbol;Acc:6738]	protein_coding	19.2335	17.5687	19.6099	21.602	21.0693	22.1748	18.804	21.6154	0.201015	0.00652039	0.000337351
ENSG00000099290	FAM21A	family with sequence similarity 21, member A [Source:HGNC Symbol;Acc:23416]	protein_coding	13.5858	13.9294	13.4757	11.33	11.4863	10.3593	13.6636	11.0586	-0.305176	0.00658691	0.000320957
ENSG00000256618	MTRNR2L1	MT-RNR2-like 1 [Source:HGNC Symbol;Acc:37155]	protein_coding	6.13599	5.90825	5.58002	4.0445	4.68108	4.00939	5.87475	4.24499	-0.468766	0.00677276	0.000152271
ENSG00000161011	SQSTM1	sequestosome 1 [Source:HGNC Symbol;Acc:11280]	protein_coding	62.7258	60.8749	60.5042	53.6262	48.8025	47.799	61.3683	50.0759	-0.293378	0.0065569	0.000382867
ENSG00000063245	EPN1	epsin 1 [Source:HGNC Symbol;Acc:21604]	protein_coding	45.26	41.5045	43.0168	48.2195	46.2968	50.5859	43.2604	48.3674	0.160987	0.005368	0.00157886
ENSG00000170325	PRDM10	PR domain containing 10 [Source:HGNC Symbol;Acc:13995]	protein_coding	1.992	1.7789	1.76367	2.30111	2.34444	2.16373	1.84486	2.26976	0.299031	0.00677843	0.000196999
ENSG00000145908	ZNF300	zinc finger protein 300 [Source:HGNC Symbol;Acc:13091]	protein_coding	3.51865	3.62987	3.49709	2.58426	2.85784	2.73345	3.54854	2.72518	-0.380871	0.00689474	9.65228e-05
ENSG00000060971	ACAA1	acetyl-CoA acyltransferase 1 [Source:HGNC Symbol;Acc:82]	protein_coding	4.58806	4.28953	4.51915	4.94568	5.2967	5.48523	4.46558	5.24254	0.231418	0.00690539	0.000135028
ENSG00000133835	HSD17B4	hydroxysteroid (17-beta) dehydrogenase 4 [Source:HGNC Symbol;Acc:5213]	protein_coding	26.8762	28.7348	28.1059	23.2827	23.5616	23.5416	27.9056	23.462	-0.250232	0.00595765	0.00110825
ENSG00000145687	SSBP2	single-stranded DNA binding protein 2 [Source:HGNC Symbol;Acc:15831]	protein_coding	2.08011	2.24622	2.20331	1.6574	1.77459	1.75978	2.17655	1.73059	-0.330779	0.00690539	0.000229102
ENSG00000173391	OLR1	oxidized low density lipoprotein (lectin-like) receptor 1 [Source:HGNC Symbol;Acc:8133]	protein_coding	3.25857	3.10401	3.108	4.13086	3.98939	3.74894	3.15686	3.9564	0.325697	0.00707343	7.70708e-05
ENSG00000173894	CBX2	chromobox homolog 2 [Source:HGNC Symbol;Acc:1552]	protein_coding	0.706633	0.73321	0.625707	0.931713	1.03273	1.01703	0.688517	0.993822	0.529497	0.00713833	1.92698e-05
ENSG00000144468	RHBDD1	rhomboid domain containing 1 [Source:HGNC Symbol;Acc:23081]	protein_coding	5.36816	5.31452	5.10824	4.19678	4.42942	4.15587	5.26364	4.26069	-0.304975	0.00690768	0.000332596
ENSG00000037474	NSUN2	NOP2/Sun RNA methyltransferase family, member 2 [Source:HGNC Symbol;Acc:25994]	protein_coding	13.3493	12.6889	13.8489	15.255	14.6588	15.0595	13.2957	14.9911	0.173149	0.00677843	0.000519299
ENSG00000121440	PDZRN3	PDZ domain containing ring finger 3 [Source:HGNC Symbol;Acc:17704]	protein_coding	6.32365	6.39836	6.14682	4.85174	5.15423	5.36682	6.28961	5.12426	-0.295626	0.00676998	0.000531148
ENSG00000182568	SATB1	SATB homeobox 1 [Source:HGNC Symbol;Acc:10541]	protein_coding	1.30862	1.3196	1.16861	0.940537	1.02465	0.914701	1.26561	0.959963	-0.398781	0.00689823	0.000452168
ENSG00000131094	C1QL1	complement component 1, q subcomponent-like 1 [Source:HGNC Symbol;Acc:24182]	protein_coding	2.41717	1.674	2.08402	1.0482	0.948233	1.40988	2.0584	1.13544	-0.858273	0.00734566	4.65337e-05
ENSG00000152270	PDE3B	phosphodiesterase 3B, cGMP-inhibited [Source:HGNC Symbol;Acc:8779]	protein_coding	0.197508	0.177806	0.265162	0.100802	0.125231	0.118079	0.213492	0.114704	-0.896265	0.00734566	8.17269e-05
ENSG00000204569	PPP1R10	protein phosphatase 1, regulatory subunit 10 [Source:HGNC Symbol;Acc:9284]	protein_coding	12.5512	12.5359	11.7141	13.4761	13.8564	14.5042	12.2671	13.9455	0.185013	0.00671835	0.000711098
ENSG00000241343	RPL36A	ribosomal protein L36a [Source:HGNC Symbol;Acc:10359]	protein_coding	3.82274	3.24224	4.04713	2.79741	2.5922	2.8885	3.70404	2.75937	-0.424761	0.00704549	0.000384175
ENSG00000099917	MED15	mediator complex subunit 15 [Source:HGNC Symbol;Acc:14248]	protein_coding	10.5035	10.0037	9.96934	11.6204	11.0976	11.3525	10.1589	11.3568	0.160824	0.0065569	0.000890512
ENSG00000137055	PLAA	phospholipase A2-activating protein [Source:HGNC Symbol;Acc:9043]	protein_coding	9.97322	9.67361	10.0815	11.0837	11.7453	11.2138	9.90945	11.3476	0.195508	0.00725623	0.000192984
ENSG00000154359	LONRF1	LON peptidase N-terminal domain and ring finger 1 [Source:HGNC Symbol;Acc:26302]	protein_coding	3.02104	2.62935	3.29924	2.20164	2.29589	2.27065	2.98321	2.25606	-0.403059	0.0071372	0.000331337
ENSG00000127418	FGFRL1	fibroblast growth factor receptor-like 1 [Source:HGNC Symbol;Acc:3693]	protein_coding	13.8272	13.2482	12.6945	15.6751	14.1688	16.5051	13.2566	15.4497	0.220861	0.00679817	0.000670388
ENSG00000115556	PLCD4	phospholipase C, delta 4 [Source:HGNC Symbol;Acc:9062]	protein_coding	1.6748	1.59084	1.74754	1.08941	1.26423	1.32926	1.67106	1.22764	-0.444879	0.00724034	0.000228786
ENSG00000235531	RP11-383H13.1	Uncharacterized protein; cDNA FLJ53548 [Source:UniProtKB/TrEMBL;Acc:B7Z945]	protein_coding	1.83217	1.95093	1.87826	1.46174	1.36694	1.36802	1.88712	1.3989	-0.431893	0.0074515	4.92858e-05
ENSG00000178922	HYI	hydroxypyruvate isomerase (putative) [Source:HGNC Symbol;Acc:26948]	protein_coding	5.05931	4.53954	5.33545	5.99078	6.08394	6.27777	4.9781	6.1175	0.297346	0.00741809	8.57278e-05
ENSG00000119682	KIAA0317	KIAA0317 [Source:HGNC Symbol;Acc:20363]	protein_coding	7.86413	7.56476	7.43714	8.55604	8.79899	8.58915	7.62201	8.64806	0.182205	0.00724034	0.000328936
ENSG00000245856	RP11-656E20.4		antisense	2.6424	1.56185	1.23569	0.750024	0.379158	0.746789	1.81331	0.625324	-1.53595	0.00758468	8.03508e-05
ENSG00000148773	MKI67	antigen identified by monoclonal antibody Ki-67 [Source:HGNC Symbol;Acc:7107]	protein_coding	9.36738	10.8689	7.60778	11.6404	13.1051	11.7607	9.28136	12.1687	0.390773	0.0072646	0.000439215
ENSG00000105726	ATP13A1	ATPase type 13A1 [Source:HGNC Symbol;Acc:24215]	protein_coding	8.59468	8.37437	7.89139	9.78107	8.80817	10.1429	8.28681	9.57739	0.208815	0.00682625	0.000951155
ENSG00000197632	SERPINB2	serpin peptidase inhibitor, clade B (ovalbumin), member 2 [Source:HGNC Symbol;Acc:8584]	protein_coding	9.69887	8.76132	9.51515	7.24236	7.74362	6.6964	9.32511	7.22746	-0.367632	0.00766463	0.000171493
ENSG00000183207	RUVBL2	RuvB-like 2 (E. coli) [Source:HGNC Symbol;Acc:10475]	protein_coding	31.0664	30.4637	32.0923	35.695	34.253	35.3376	31.2075	35.0952	0.169382	0.00749938	0.000356003
ENSG00000154175	ABI3BP	ABI family, member 3 (NESH) binding protein [Source:HGNC Symbol;Acc:17265]	protein_coding	0.437469	0.519353	0.444429	0.284561	0.332801	0.23017	0.467084	0.282511	-0.725377	0.00783471	2.22259e-05
ENSG00000108846	ABCC3	ATP-binding cassette, sub-family C (CFTR/MRP), member 3 [Source:HGNC Symbol;Acc:54]	protein_coding	11.4567	10.9154	10.7262	9.06451	8.40057	9.58769	11.0328	9.01759	-0.290979	0.00731381	0.000549061
ENSG00000078246	TULP3	tubby like protein 3 [Source:HGNC Symbol;Acc:12425]	protein_coding	17.1494	17.5531	18.1169	13.8438	14.7331	15.1698	17.6065	14.5822	-0.271893	0.00699625	0.000890475
ENSG00000175073	VCPIP1	valosin containing protein (p97)/p47 complex interacting protein 1 [Source:HGNC Symbol;Acc:30897]	protein_coding	2.65201	2.67422	2.63883	3.23994	3.10254	2.93659	2.65502	3.09302	0.220294	0.00741809	0.000579723
ENSG00000183309	ZNF623	zinc finger protein 623 [Source:HGNC Symbol;Acc:29084]	protein_coding	3.70498	3.79061	3.73944	4.50591	4.32287	4.3581	3.74501	4.39563	0.2311	0.00801974	0.000113419
ENSG00000177427	SMCR7	Smith-Magenis syndrome chromosome region, candidate 7 [Source:HGNC Symbol;Acc:17920]	protein_coding	3.56443	3.17791	3.41569	4.40098	3.82018	4.56962	3.38601	4.26359	0.332483	0.00784449	0.000301197
ENSG00000079616	KIF22	kinesin family member 22 [Source:HGNC Symbol;Acc:6391]	protein_coding	6.04327	5.65806	5.87477	6.48274	6.94051	7.21074	5.8587	6.878	0.231408	0.00798608	0.000166981
ENSG00000204389	HSPA1A	heat shock 70kDa protein 1A [Source:HGNC Symbol;Acc:5232]	protein_coding	30.6153	28.7035	28.7349	22.6269	20.8051	25.7268	29.3512	23.0529	-0.34847	0.00788798	0.000281677
ENSG00000122042	UBL3	ubiquitin-like 3 [Source:HGNC Symbol;Acc:12504]	protein_coding	11.6657	11.9001	11.6288	12.9867	13.582	13.6136	11.7315	13.3941	0.191211	0.0080729	0.000207662
ENSG00000108387	SEPT4	septin 4 [Source:HGNC Symbol;Acc:9165]	protein_coding	0.896513	0.925229	0.875804	0.407284	0.474179	0.540703	0.899182	0.474055	-0.923558	0.00834855	1.61016e-05
ENSG00000127564	PKMYT1	protein kinase, membrane associated tyrosine/threonine 1 [Source:HGNC Symbol;Acc:29650]	protein_coding	2.78168	2.35219	2.44529	3.08701	3.18234	3.43531	2.52639	3.23489	0.356641	0.00834427	0.000130779
ENSG00000136868	SLC31A1	solute carrier family 31 (copper transporters), member 1 [Source:HGNC Symbol;Acc:11016]	protein_coding	14.7048	14.2765	14.2392	12.3653	11.7748	11.7701	14.4068	11.9701	-0.267319	0.00794949	0.000545672
ENSG00000103187	COTL1	coactosin-like 1 (Dictyostelium) [Source:HGNC Symbol;Acc:18304]	protein_coding	60.0531	58.6349	62.2591	65.9406	65.4659	68.4022	60.3157	66.6029	0.143051	0.00775272	0.000798873
ENSG00000134001	EIF2S1	eukaryotic translation initiation factor 2, subunit 1 alpha, 35kDa [Source:HGNC Symbol;Acc:3265]	protein_coding	15.8659	15.411	16.6937	17.6166	18.6257	17.735	15.9902	17.9924	0.170205	0.00794949	0.000617514
ENSG00000124789	NUP153	nucleoporin 153kDa [Source:HGNC Symbol;Acc:8062]	protein_coding	12.9035	13.5287	12.1309	14.3922	15.175	14.4739	12.8544	14.6804	0.191631	0.00754934	0.00103164
ENSG00000188313	PLSCR1	phospholipid scramblase 1 [Source:HGNC Symbol;Acc:9092]	protein_coding	4.73705	4.63112	4.95664	3.65758	3.96124	3.65444	4.77494	3.75775	-0.345611	0.00840874	0.000175184
ENSG00000131467	PSME3	proteasome (prosome, macropain) activator subunit 3 (PA28 gamma; Ki) [Source:HGNC Symbol;Acc:9570]	protein_coding	26.2324	26.0186	26.918	29.2565	28.9626	30.3317	26.3897	29.517	0.16157	0.00826407	0.000321191
ENSG00000142949	PTPRF	protein tyrosine phosphatase, receptor type, F [Source:HGNC Symbol;Acc:9670]	protein_coding	23.5087	23.7013	20.0901	27.2098	25.1156	25.4846	22.4334	25.9367	0.209346	0.004819	0.00377288
ENSG00000149577	SIDT2	SID1 transmembrane family, member 2 [Source:HGNC Symbol;Acc:24272]	protein_coding	5.66528	5.25881	5.2975	6.37929	5.79268	6.25932	5.40719	6.14376	0.184243	0.00682625	0.00179409
ENSG00000110721	CHKA	choline kinase alpha [Source:HGNC Symbol;Acc:1937]	protein_coding	4.28704	3.37546	3.79593	2.85566	2.92302	2.70794	3.81948	2.82887	-0.433147	0.00824002	0.000428371
ENSG00000148737	TCF7L2	transcription factor 7-like 2 (T-cell specific, HMG-box) [Source:HGNC Symbol;Acc:11641]	protein_coding	4.23939	3.97862	4.03887	3.15916	2.92204	3.44335	4.08563	3.17485	-0.363868	0.00851687	0.000234384
ENSG00000231340	ACTG1P10	actin, gamma 1 pseudogene 10 [Source:HGNC Symbol;Acc:155]	pseudogene	8.52441	10.3749	9.88242	11.4339	13.1713	12.3873	9.59392	12.3309	0.36208	0.00856038	0.000197436
ENSG00000148331	ASB6	ankyrin repeat and SOCS box containing 6 [Source:HGNC Symbol;Acc:17181]	protein_coding	9.60971	9.50899	9.73005	10.9479	11.2873	11.8702	9.61625	11.3685	0.24149	0.00872792	5.38454e-05
ENSG00000177963	RIC8A	resistance to inhibitors of cholinesterase 8 homolog A (C. elegans) [Source:HGNC Symbol;Acc:29550]	protein_coding	22.9937	22.8818	23.3766	26.1256	25.1191	25.6452	23.084	25.6299	0.150936	0.0080729	0.000729851
ENSG00000237493	RP11-603J24.7		pseudogene	23.9063	24.0634	24.6201	18.7358	18.0079	18.5527	24.1966	18.4321	-0.392582	0.00880413	3.70304e-05
ENSG00000138107	ACTR1A	ARP1 actin-related protein 1 homolog A, centractin alpha (yeast) [Source:HGNC Symbol;Acc:167]	protein_coding	40.1865	38.8984	39.8218	43.4876	44.484	44.219	39.6356	44.0635	0.152788	0.00848812	0.000367655
ENSG00000170681	MURC	muscle-related coiled-coil protein [Source:HGNC Symbol;Acc:33742]	protein_coding	1.19192	0.994122	1.19542	0.664553	0.671901	0.64068	1.12716	0.659045	-0.774239	0.00886199	1.82543e-05
ENSG00000176834	VSIG10	V-set and immunoglobulin domain containing 10 [Source:HGNC Symbol;Acc:26078]	protein_coding	2.61286	2.30137	2.65254	1.92523	1.95936	1.99181	2.52226	1.9588	-0.364748	0.0087125	0.000241507
ENSG00000115107	STEAP3	STEAP family member 3, metalloreductase [Source:HGNC Symbol;Acc:24592]	protein_coding	23.9026	23.8373	24.3367	20.2931	19.7763	20.4663	24.0256	20.1786	-0.251744	0.00853412	0.000420921
ENSG00000054356	PTPRN	protein tyrosine phosphatase, receptor type, N [Source:HGNC Symbol;Acc:9676]	protein_coding	2.6719	2.41737	2.34472	3.01269	2.7717	2.98224	2.478	2.92221	0.237888	0.00809304	0.000875954
ENSG00000118363	SPCS2	signal peptidase complex subunit 2 homolog (S. cerevisiae) [Source:HGNC Symbol;Acc:28962]	protein_coding	17.9576	17.1456	18.9276	14.3199	14.7544	15.5904	18.0103	14.8882	-0.27465	0.00788798	0.00110127
ENSG00000116191	RALGPS2	Ral GEF with PH domain and SH3 binding motif 2 [Source:HGNC Symbol;Acc:30279]	protein_coding	12.6869	12.9747	12.1681	10.1787	10.9713	9.8894	12.6099	10.3465	-0.285416	0.00821235	0.000808227
ENSG00000116685	KIAA2013	KIAA2013 [Source:HGNC Symbol;Acc:28513]	protein_coding	14.9767	15.2883	15.8587	17.0751	17.0429	18.5334	15.3746	17.5505	0.190965	0.00855446	0.000476914
ENSG00000223745	RP4-717I23.3		processed_transcript	3.72941	3.57085	3.71796	2.92338	2.80732	2.77049	3.67274	2.83373	-0.374156	0.00901966	5.12681e-05
ENSG00000074370	ATP2A3	ATPase, Ca++ transporting, ubiquitous [Source:HGNC Symbol;Acc:813]	protein_coding	1.27977	0.927902	0.971642	0.675307	0.584007	0.7612	1.05977	0.673505	-0.653993	0.00870416	0.00036974
ENSG00000180611	MB21D2	Mab-21 domain containing 2 [Source:HGNC Symbol;Acc:30438]	protein_coding	4.8916	4.85922	4.58874	5.7863	5.56459	5.85512	4.77985	5.73534	0.262912	0.00898568	9.97196e-05
ENSG00000183741	CBX6	chromobox homolog 6 [Source:HGNC Symbol;Acc:1556]	protein_coding	14.7182	13.7258	13.7235	16.2156	15.0074	15.7985	14.0558	15.6738	0.157188	0.00641701	0.00276516
ENSG00000139734	DIAPH3	diaphanous homolog 3 (Drosophila) [Source:HGNC Symbol;Acc:15480]	protein_coding	5.61694	5.71529	5.91668	6.26814	7.18268	7.01499	5.74964	6.82194	0.24671	0.00905381	0.000131145
ENSG00000189159	HN1	hematological and neurological expressed 1 [Source:HGNC Symbol;Acc:14569]	protein_coding	30.4475	30.4693	32.4277	33.5891	34.3201	36.9731	31.1148	34.9608	0.168134	0.00834855	0.000970289
ENSG00000071539	TRIP13	thyroid hormone receptor interactor 13 [Source:HGNC Symbol;Acc:12307]	protein_coding	5.36037	5.38547	6.12207	6.4912	6.6041	6.97432	5.62264	6.68987	0.250732	0.00909641	0.000303139
ENSG00000144357	UBR3	ubiquitin protein ligase E3 component n-recognin 3 (putative) [Source:HGNC Symbol;Acc:30467]	protein_coding	5.83194	5.99839	5.21619	6.85601	7.1123	6.35539	5.68217	6.77457	0.253687	0.00909641	0.000334711
ENSG00000143578	CREB3L4	cAMP responsive element binding protein 3-like 4 [Source:HGNC Symbol;Acc:18854]	protein_coding	1.8246	1.81652	2.05741	1.22949	1.34129	1.29259	1.89951	1.28779	-0.560729	0.00938846	5.31444e-05
ENSG00000101493	ZNF516	zinc finger protein 516 [Source:HGNC Symbol;Acc:28990]	protein_coding	7.21893	6.56623	6.46696	5.55465	5.61047	5.54093	6.75071	5.56868	-0.277702	0.00809362	0.00135782
ENSG00000106211	HSPB1	heat shock 27kDa protein 1 [Source:HGNC Symbol;Acc:5246]	protein_coding	217.982	192.886	207.671	237.002	214.136	275.846	206.18	242.328	0.233058	0.0056319	0.00386512
ENSG00000196975	ANXA4	annexin A4 [Source:HGNC Symbol;Acc:542]	protein_coding	7.19541	7.14432	7.33649	6.00122	6.02344	5.98282	7.22541	6.00249	-0.267517	0.00916393	0.000335269
ENSG00000154856	APCDD1	adenomatosis polyposis coli down-regulated 1 [Source:HGNC Symbol;Acc:15718]	protein_coding	0.955884	0.910913	1.00349	1.3889	1.61109	1.35075	0.956762	1.45025	0.600065	0.00947701	2.76058e-05
ENSG00000167785	ZNF558	zinc finger protein 558 [Source:HGNC Symbol;Acc:26422]	protein_coding	6.3535	6.34391	5.65595	4.72838	4.81753	4.88145	6.11778	4.80912	-0.347237	0.00905381	0.000487244
ENSG00000123268	ATF1	activating transcription factor 1 [Source:HGNC Symbol;Acc:783]	protein_coding	10.1684	9.66708	9.62323	7.51893	8.09687	8.05253	9.81958	7.88944	-0.315739	0.00929048	0.000260756
ENSG00000106003	LFNG	LFNG O-fucosylpeptide 3-beta-N-acetylglucosaminyltransferase [Source:HGNC Symbol;Acc:6560]	protein_coding	0.499899	0.481841	0.684461	0.920292	0.810541	0.952975	0.5554	0.894603	0.687719	0.00952612	3.53606e-05
ENSG00000136279	DBNL	drebrin-like [Source:HGNC Symbol;Acc:2696]	protein_coding	9.90966	9.78844	10.0469	10.8599	11.0259	11.3097	9.91502	11.0652	0.15834	0.00930229	0.000300506
ENSG00000260942	RP11-27M15.1		antisense	0.278293	0.258486	0.21181	0.465484	0.397421	0.514973	0.24953	0.459293	0.880202	0.00959317	2.0601e-05
ENSG00000102471	NDFIP2	Nedd4 family interacting protein 2 [Source:HGNC Symbol;Acc:18537]	protein_coding	8.19277	7.86783	8.13966	9.18183	9.63298	8.95506	8.06675	9.25662	0.198498	0.00933468	0.000344959
ENSG00000168487	BMP1	bone morphogenetic protein 1 [Source:HGNC Symbol;Acc:1067]	protein_coding	16.0408	14.8121	14.8325	17.3846	16.2983	17.2453	15.2285	16.976	0.156729	0.0070212	0.00269847
ENSG00000113810	SMC4	structural maintenance of chromosomes 4 [Source:HGNC Symbol;Acc:14013]	protein_coding	9.78872	10.1426	9.53016	10.6985	11.414	11.0815	9.82049	11.0647	0.172094	0.00880227	0.000931684
ENSG00000132846	ZBED3	zinc finger, BED-type containing 3 [Source:HGNC Symbol;Acc:20711]	protein_coding	1.19134	1.28795	1.08985	0.84798	0.890537	0.796888	1.18971	0.845135	-0.493362	0.00947701	0.000262214
ENSG00000117395	EBNA1BP2	EBNA1 binding protein 2 [Source:HGNC Symbol;Acc:15531]	protein_coding	19.2451	19.6161	21.0383	22.1299	23.2278	22.3301	19.9665	22.5626	0.176354	0.00900652	0.00075388
ENSG00000121060	TRIM25	tripartite motif containing 25 [Source:HGNC Symbol;Acc:12932]	protein_coding	23.311	24.6297	22.6693	19.46	20.1303	19.8147	23.5367	19.8017	-0.249286	0.00741809	0.00248598
ENSG00000112936	C7	complement component 7 [Source:HGNC Symbol;Acc:1346]	protein_coding	1.07174	1.19566	1.20447	1.49942	1.52257	1.54595	1.15729	1.52265	0.395832	0.00988502	4.0849e-05
ENSG00000101265	RASSF2	Ras association (RalGDS/AF-6) domain family member 2 [Source:HGNC Symbol;Acc:9883]	protein_coding	7.83934	8.10269	8.04298	5.88485	6.77492	6.6533	7.995	6.43769	-0.312556	0.00966416	0.000349995
ENSG00000100345	MYH9	myosin, heavy chain 9, non-muscle [Source:HGNC Symbol;Acc:7579]	protein_coding	346.052	348.878	304.604	412.269	384.859	372.457	333.178	389.862	0.22667	0.0091614	0.00086158
ENSG00000112242	E2F3	E2F transcription factor 3 [Source:HGNC Symbol;Acc:3115]	protein_coding	7.37843	7.01158	7.11393	8.24406	8.09722	8.33931	7.16798	8.22687	0.198777	0.00986954	0.000205423
ENSG00000102786	INTS6	integrator complex subunit 6 [Source:HGNC Symbol;Acc:14879]	protein_coding	4.83399	5.06584	4.49669	3.87361	4.07133	3.72304	4.79884	3.88933	-0.303166	0.00811755	0.00197759
ENSG00000147454	SLC25A37	solute carrier family 25 (mitochondrial iron transporter), member 37 [Source:HGNC Symbol;Acc:29786]	protein_coding	7.51886	7.19404	7.01782	6.1935	5.86403	5.83893	7.24358	5.96549	-0.280063	0.00922254	0.000961582
ENSG00000167676	PLIN4	perilipin 4 [Source:HGNC Symbol;Acc:29393]	protein_coding	0.431355	0.330773	0.396233	0.195756	0.233106	0.225231	0.38612	0.218031	-0.824513	0.0101805	4.8437e-05
ENSG00000125089	SH3TC1	SH3 domain and tetratricopeptide repeats 1 [Source:HGNC Symbol;Acc:26009]	protein_coding	0.357077	0.302569	0.296353	0.193557	0.17853	0.202865	0.318666	0.191651	-0.733567	0.0101984	3.59602e-05
ENSG00000183873	SCN5A	sodium channel, voltage-gated, type V, alpha subunit [Source:HGNC Symbol;Acc:10593]	protein_coding	1.49864	1.56008	1.26871	1.84019	1.7958	1.74108	1.44248	1.79236	0.313311	0.0098215	0.000435486
ENSG00000178502	KLHL11	kelch-like 11 (Drosophila) [Source:HGNC Symbol;Acc:19008]	protein_coding	0.760754	0.81818	0.711072	1.21542	1.20545	1.23323	0.763335	1.21803	0.674163	0.0102871	1.63949e-05
ENSG00000134569	LRP4	low density lipoprotein receptor-related protein 4 [Source:HGNC Symbol;Acc:6696]	protein_coding	1.26154	1.34357	1.2132	1.67007	1.49227	1.52709	1.27277	1.56314	0.296481	0.00974011	0.000607188
ENSG00000071553	ATP6AP1	ATPase, H+ transporting, lysosomal accessory protein 1 [Source:HGNC Symbol;Acc:868]	protein_coding	27.6567	27.5936	28.5752	31.0365	30.1733	32.0203	27.9418	31.0767	0.153407	0.00962893	0.000732847
ENSG00000100364	KIAA0930	KIAA0930 [Source:HGNC Symbol;Acc:1314]	protein_coding	9.45847	9.56709	9.38599	10.9884	10.1718	10.6595	9.47051	10.6066	0.163442	0.00887296	0.00149218
ENSG00000082781	ITGB5	integrin, beta 5 [Source:HGNC Symbol;Acc:6160]	protein_coding	42.2295	42.7507	41.5374	47.9051	45.6454	46.0933	42.1725	46.5479	0.142413	0.00790647	0.00246554
ENSG00000085276	MECOM	MDS1 and EVI1 complex locus [Source:HGNC Symbol;Acc:3498]	protein_coding	1.50237	1.61612	1.52447	1.92496	1.87194	1.8103	1.54765	1.86907	0.272235	0.0101816	0.000203011
ENSG00000103005	USB1	U6 snRNA biogenesis 1 [Source:HGNC Symbol;Acc:25792]	protein_coding	5.6914	5.96186	5.99151	6.95613	6.26959	7.17452	5.88159	6.80008	0.209345	0.00965059	0.000749665
ENSG00000160179	ABCG1	ATP-binding cassette, sub-family G (WHITE), member 1 [Source:HGNC Symbol;Acc:73]	protein_coding	1.24977	1.25636	1.17636	0.893231	0.793742	0.919357	1.2275	0.868777	-0.498662	0.0103558	8.56657e-05
ENSG00000130522	JUND	jun D proto-oncogene [Source:HGNC Symbol;Acc:6206]	protein_coding	56.4664	46.3182	50.4939	38.1127	36.9868	43.0484	51.0928	39.3826	-0.375561	0.010328	0.000119387
ENSG00000179222	MAGED1	melanoma antigen family D, 1 [Source:HGNC Symbol;Acc:6813]	protein_coding	105.258	104.077	105.716	113.41	116.87	116.755	105.017	115.678	0.139491	0.00988395	0.000613462
ENSG00000197956	S100A6	S100 calcium binding protein A6 [Source:HGNC Symbol;Acc:10496]	protein_coding	1572.41	1623.61	1808.28	1409.09	1417.79	1370.97	1668.1	1399.28	-0.253517	0.00652039	0.00400148
ENSG00000168781	PPIP5K1	diphosphoinositol pentakisphosphate kinase 1 [Source:HGNC Symbol;Acc:29023]	protein_coding	1.74137	1.75358	1.61843	1.26429	1.37788	1.36959	1.70446	1.33725	-0.350042	0.0101456	0.000396409
ENSG00000166780	C16orf45	chromosome 16 open reading frame 45 [Source:HGNC Symbol;Acc:19213]	protein_coding	8.26168	8.15428	8.15143	6.58005	6.39002	6.83652	8.18913	6.60219	-0.310765	0.0103811	0.000163722
ENSG00000015532	XYLT2	xylosyltransferase II [Source:HGNC Symbol;Acc:15517]	protein_coding	17.8409	16.8128	16.3644	20.1635	18.2835	19.1066	17.006	19.1845	0.173897	0.00713833	0.00341546
ENSG00000105974	CAV1	caveolin 1, caveolae protein, 22kDa [Source:HGNC Symbol;Acc:1527]	protein_coding	137.283	134.562	141.103	146.776	157.327	152.113	137.649	152.072	0.143757	0.00939719	0.00119634
ENSG00000223496	EXOSC6	exosome component 6 [Source:HGNC Symbol;Acc:19055]	protein_coding	7.63317	7.42007	6.63358	5.56147	5.23333	5.46073	7.22894	5.41851	-0.415888	0.0103488	0.00026786
ENSG00000143554	SLC27A3	solute carrier family 27 (fatty acid transporter), member 3 [Source:HGNC Symbol;Acc:10997]	protein_coding	1.81991	1.8146	1.92276	1.30105	1.29504	1.5264	1.85242	1.37416	-0.430861	0.0104214	0.000245331
ENSG00000218891	ZNF579	zinc finger protein 579 [Source:HGNC Symbol;Acc:26646]	protein_coding	5.77069	5.12812	5.13897	6.26567	6.48946	7.91242	5.34593	6.88918	0.365893	0.0103579	0.000313748
ENSG00000143368	SF3B4	splicing factor 3b, subunit 4, 49kDa [Source:HGNC Symbol;Acc:10771]	protein_coding	28.4898	26.7911	27.1851	31.2304	29.8893	31.7838	27.4887	30.9678	0.171933	0.00988546	0.000841603
ENSG00000087274	ADD1	adducin 1 (alpha) [Source:HGNC Symbol;Acc:243]	protein_coding	26.9635	27.1903	26.3084	29.0465	30.0108	29.8186	26.8208	29.6253	0.14348	0.00959317	0.00115051
ENSG00000105137	SYDE1	synapse defective 1, Rho GTPase, homolog 1 (C. elegans) [Source:HGNC Symbol;Acc:25824]	protein_coding	32.88	30.204	30.535	34.4782	34.223	35.8719	31.2063	34.8577	0.159638	0.0094387	0.00131364
ENSG00000099625	C19orf26	chromosome 19 open reading frame 26 [Source:HGNC Symbol;Acc:28617]	protein_coding	2.60543	2.10021	2.21379	3.06872	2.68448	3.57578	2.30648	3.10966	0.431066	0.010328	0.000452768
ENSG00000137449	CPEB2	cytoplasmic polyadenylation element binding protein 2 [Source:HGNC Symbol;Acc:21745]	protein_coding	13.4009	12.5253	13.1157	11.0979	10.9194	10.6501	13.014	10.8891	-0.257171	0.0100741	0.000839498
ENSG00000130726	TRIM28	tripartite motif containing 28 [Source:HGNC Symbol;Acc:16384]	protein_coding	78.346	74.2774	77.3182	82.1234	84.6856	88.1041	76.6472	84.971	0.148738	0.0100105	0.000926126
ENSG00000222047	C10orf55	chromosome 10 open reading frame 55 [Source:HGNC Symbol;Acc:31008]	protein_coding	2.53022	2.70266	2.60311	1.92563	1.67513	1.82446	2.612	1.80841	-0.530434	0.0108736	6.58114e-05
ENSG00000168807	SNTB2	syntrophin, beta 2 (dystrophin-associated protein A1, 59kDa, basic component 2) [Source:HGNC Symbol;Acc:11169]	protein_coding	4.45318	4.64932	4.09342	5.08673	5.23904	4.91954	4.39864	5.08177	0.208273	0.00966121	0.00136324
ENSG00000129195	FAM64A	family with sequence similarity 64, member A [Source:HGNC Symbol;Acc:25483]	protein_coding	10.1818	9.08662	10.047	10.8698	12.7572	12.6177	9.77178	12.0816	0.306117	0.0108736	0.000201761
ENSG00000026559	KCNG1	potassium voltage-gated channel, subfamily G, member 1 [Source:HGNC Symbol;Acc:6248]	protein_coding	0.958898	0.867006	0.763899	0.51886	0.47623	0.571582	0.863268	0.522224	-0.72514	0.0110932	5.39556e-05
ENSG00000171992	SYNPO	synaptopodin [Source:HGNC Symbol;Acc:30672]	protein_coding	6.05527	6.22042	5.5309	6.66345	6.5441	7.21036	5.93553	6.80597	0.197424	0.00925493	0.00189704
ENSG00000099725	PRKY	protein kinase, Y-linked, pseudogene [Source:HGNC Symbol;Acc:9444]	pseudogene	3.74248	3.10657	3.60908	2.85224	2.53307	2.80593	3.48604	2.73041	-0.35247	0.0098215	0.00135141
ENSG00000143549	TPM3	tropomyosin 3 [Source:HGNC Symbol;Acc:12012]	protein_coding	46.8649	47.4786	49.4839	51.9344	53.8609	52.9731	47.9425	52.9228	0.142584	0.010128	0.0011357
ENSG00000255443	RP1-68D18.4		antisense	5.79748	4.78095	4.33003	2.5728	2.75566	3.55598	4.96949	2.96148	-0.746778	0.011052	0.000238613
ENSG00000151292	CSNK1G3	casein kinase 1, gamma 3 [Source:HGNC Symbol;Acc:2456]	protein_coding	8.9817	8.91555	8.75873	7.43119	7.39064	7.02011	8.88532	7.28065	-0.287358	0.0107869	0.000548437
ENSG00000178814	OPLAH	5-oxoprolinase (ATP-hydrolysing) [Source:HGNC Symbol;Acc:8149]	processed_transcript	3.21655	3.2064	2.90056	2.36997	1.91694	2.41536	3.10784	2.23409	-0.476223	0.0111655	0.00017244
ENSG00000226666	HSPA9P1	heat shock 70kDa protein 9 pseudogene 1 [Source:HGNC Symbol;Acc:24915]	pseudogene	3.44853	2.73719	3.31173	2.15141	2.35045	2.09813	3.16582	2.19999	-0.525078	0.0110595	0.000349995
ENSG00000177675	CD163L1	CD163 molecule-like 1 [Source:HGNC Symbol;Acc:30375]	protein_coding	1.0732	1.27718	1.20147	1.56707	1.49004	1.53496	1.18395	1.53069	0.370572	0.0112494	0.000173061
ENSG00000067715	SYT1	synaptotagmin I [Source:HGNC Symbol;Acc:11509]	protein_coding	1.48886	1.5967	1.5206	1.11501	1.12519	1.16729	1.53539	1.13583	-0.434856	0.0113456	8.91244e-05
ENSG00000240869	Metazoa_SRP	Metazoan signal recognition particle RNA [Source:RFAM;Acc:RF00017]	misc_RNA	3.99224	2.96649	4.88958	6.0593	27.1891	3.10277	3.94944	12.117	1.61732	2.14856e-06	0.0114741
ENSG00000028277	POU2F2	POU class 2 homeobox 2 [Source:HGNC Symbol;Acc:9213]	protein_coding	1.10391	1.1293	1.00001	1.45598	1.39178	1.30912	1.07774	1.38563	0.362533	0.0113288	0.000256038
ENSG00000188636	LDOC1L	leucine zipper, down-regulated in cancer 1-like [Source:HGNC Symbol;Acc:13343]	protein_coding	10.8177	11.2198	10.123	11.995	12.2164	12.3256	10.7202	12.179	0.184072	0.0104005	0.00126123
ENSG00000100767	PAPLN	papilin, proteoglycan-like sulfated glycoprotein [Source:HGNC Symbol;Acc:19262]	protein_coding	0.853241	0.666171	0.68911	0.530878	0.484338	0.462737	0.736174	0.492651	-0.57948	0.0113633	0.000316523
ENSG00000176871	WSB2	WD repeat and SOCS box containing 2 [Source:HGNC Symbol;Acc:19222]	protein_coding	22.633	24.3713	24.5236	27.1514	27.148	25.8889	23.8426	26.7294	0.164886	0.00932872	0.00235507
ENSG00000117643	MAN1C1	mannosidase, alpha, class 1C, member 1 [Source:HGNC Symbol;Acc:19080]	protein_coding	7.42725	7.6688	7.14013	6.3437	5.61249	6.1518	7.41206	6.036	-0.296283	0.0104994	0.00119715
ENSG00000120885	CLU	clusterin [Source:HGNC Symbol;Acc:2095]	protein_coding	94.4003	94.3034	98.4557	83.3749	78.9717	82.6614	95.7198	81.6693	-0.229023	0.00945439	0.00225543
ENSG00000138434	SSFA2	sperm specific antigen 2 [Source:HGNC Symbol;Acc:11319]	protein_coding	33.8329	34.7022	34.4229	37.6649	40.7278	37.3312	34.3193	38.5746	0.168631	0.0108683	0.00086158
ENSG00000025770	NCAPH2	non-SMC condensin II complex, subunit H2 [Source:HGNC Symbol;Acc:25071]	protein_coding	8.68641	7.75266	8.2466	9.6086	9.67654	9.32829	8.22856	9.53781	0.213019	0.0112378	0.000559186
ENSG00000107438	PDLIM1	PDZ and LIM domain 1 [Source:HGNC Symbol;Acc:2067]	protein_coding	116.878	113.705	117.696	125.885	126.218	140.589	116.093	130.897	0.173149	0.0112342	0.000622751
ENSG00000169641	LUZP1	leucine zipper protein 1 [Source:HGNC Symbol;Acc:14985]	protein_coding	8.61824	9.48208	7.70354	10.3303	10.6643	9.7097	8.60128	10.2348	0.250852	0.0105398	0.00140421
ENSG00000103512	NOMO1	NODAL modulator 1 [Source:HGNC Symbol;Acc:30060]	protein_coding	44.4416	46.4009	43.0923	49.9908	49.3417	48.7238	44.6449	49.3521	0.144614	0.0080077	0.00396524
ENSG00000179409	GEMIN4	gem (nuclear organelle) associated protein 4 [Source:HGNC Symbol;Acc:15717]	protein_coding	5.95119	5.81981	5.8493	6.77439	6.6126	7.30497	5.87343	6.89732	0.231832	0.0118321	0.000204224
ENSG00000070423	RNF126	ring finger protein 126 [Source:HGNC Symbol;Acc:21151]	protein_coding	13.3132	11.0735	13.3297	14.8688	15.3509	18.7885	12.5721	16.3361	0.377834	0.0119677	0.000101381
ENSG00000124541	RRP36	ribosomal RNA processing 36 homolog (S. cerevisiae) [Source:HGNC Symbol;Acc:21374]	protein_coding	39.8178	40.8582	42.5751	44.0717	48.5113	49.5749	41.0837	47.386	0.205894	0.0115997	0.000471413
ENSG00000075240	GRAMD4	GRAM domain containing 4 [Source:HGNC Symbol;Acc:29113]	protein_coding	4.28318	3.99043	4.08989	3.30689	3.2193	3.18723	4.12117	3.23781	-0.348036	0.0119505	0.000129782
ENSG00000186469	GNG2	guanine nucleotide binding protein (G protein), gamma 2 [Source:HGNC Symbol;Acc:4404]	protein_coding	5.78316	5.60329	5.26186	4.31355	4.7255	4.54594	5.54944	4.52833	-0.293362	0.0104144	0.00167882
ENSG00000138092	CENPO	centromere protein O [Source:HGNC Symbol;Acc:28152]	protein_coding	2.70324	2.75711	2.70021	3.26557	3.20943	3.3249	2.72019	3.26663	0.264097	0.0121035	6.66109e-05
ENSG00000171621	SPSB1	splA/ryanodine receptor domain and SOCS box containing 1 [Source:HGNC Symbol;Acc:30628]	protein_coding	8.31805	8.34239	8.23315	9.91549	9.22811	9.57207	8.29786	9.57189	0.206064	0.0117156	0.000520307
ENSG00000135617	PRADC1	protease-associated domain containing 1 [Source:HGNC Symbol;Acc:16047]	protein_coding	6.17109	6.63471	7.03907	8.18999	8.70175	7.96433	6.61496	8.28536	0.324832	0.0121362	0.000181975
ENSG00000224959	AC017002.2		lincRNA	4.296	2.24661	3.97937	1.83164	1.80441	2.18225	3.50733	1.93944	-0.854736	0.0108683	0.00151204
ENSG00000152137	HSPB8	heat shock 22kDa protein 8 [Source:HGNC Symbol;Acc:30171]	protein_coding	9.13639	9.40607	9.04671	10.6626	10.6268	10.7535	9.19639	10.681	0.215903	0.0122451	0.000198189
ENSG00000256977	LIMS3	LIM and senescent cell antigen-like-containing domain protein 3 [Source:UniProtKB/Swiss-Prot;Acc:P0CW19]	protein_coding	0.555481	0.4498	0.562586	0.231619	0.149875	0.282893	0.522622	0.221462	-1.23871	0.012469	2.98544e-05
ENSG00000178209	PLEC	plectin [Source:HGNC Symbol;Acc:9069]	protein_coding	43.5531	41.2482	33.5395	46.8404	43.8838	48.7195	39.4469	46.4812	0.236736	0.00406754	0.00844917
ENSG00000162073	PAQR4	progestin and adipoQ receptor family member IV [Source:HGNC Symbol;Acc:26386]	protein_coding	2.40273	1.91442	1.84099	2.5851	2.71603	3.09758	2.05271	2.79957	0.447673	0.0122451	0.000280541
ENSG00000131351	HAUS8	HAUS augmin-like complex, subunit 8 [Source:HGNC Symbol;Acc:30532]	protein_coding	3.30298	3.16949	2.97377	4.15471	3.98965	4.6468	3.14875	4.26372	0.437336	0.012469	0.000113268
ENSG00000111885	MAN1A1	mannosidase, alpha, class 1A, member 1 [Source:HGNC Symbol;Acc:6821]	protein_coding	12.707	12.4776	12.4724	10.603	10.1411	10.6344	12.5523	10.4595	-0.263141	0.0119505	0.000638566
ENSG00000112175	BMP5	bone morphogenetic protein 5 [Source:HGNC Symbol;Acc:1072]	protein_coding	0.40239	0.366276	0.584009	0.177985	0.14114	0.264089	0.450891	0.194405	-1.21372	0.0125744	1.68789e-05
ENSG00000067057	PFKP	phosphofructokinase, platelet [Source:HGNC Symbol;Acc:8878]	protein_coding	49.2041	48.5263	46.8157	55.8001	50.7808	53.8895	48.182	53.4901	0.150777	0.0085978	0.00400601
ENSG00000188976	NOC2L	nucleolar complex associated 2 homolog (S. cerevisiae) [Source:HGNC Symbol;Acc:24517]	protein_coding	15.7732	15.648	15.1166	17.4499	16.7214	17.7812	15.5126	17.3175	0.158793	0.0113633	0.00130155
ENSG00000152193	RNF219	ring finger protein 219 [Source:HGNC Symbol;Acc:20308]	protein_coding	2.00076	1.98393	2.11105	2.47977	2.83713	2.53717	2.03191	2.61802	0.365639	0.0125697	0.00013117
ENSG00000198561	CTNND1	catenin (cadherin-associated protein), delta 1 [Source:HGNC Symbol;Acc:2515]	protein_coding	30.163	30.8857	29.6882	33.0758	33.4999	33.5316	30.2456	33.3691	0.141786	0.0112378	0.00154197
ENSG00000149131	SERPING1	serpin peptidase inhibitor, clade G (C1 inhibitor), member 1 [Source:HGNC Symbol;Acc:1228]	protein_coding	8.20059	8.55983	8.77349	6.94199	7.05938	6.67002	8.5113	6.89046	-0.304779	0.0122726	0.000520936
ENSG00000164331	ANKRA2	ankyrin repeat, family A (RFXANK-like), 2 [Source:HGNC Symbol;Acc:13208]	protein_coding	6.4471	6.28821	6.79015	4.83165	5.03453	5.4538	6.50849	5.10666	-0.349942	0.0124732	0.000348754
ENSG00000117525	F3	coagulation factor III (thromboplastin, tissue factor) [Source:HGNC Symbol;Acc:3541]	protein_coding	544.4	509.641	557.244	594.373	567.718	605.878	537.095	589.323	0.133882	0.00871225	0.00411812
ENSG00000172992	DCAKD	dephospho-CoA kinase domain containing [Source:HGNC Symbol;Acc:26238]	protein_coding	14.9595	13.372	14.2327	11.6531	10.6374	12.0677	14.1881	11.4527	-0.308989	0.011325	0.00152272
ENSG00000137804	NUSAP1	nucleolar and spindle associated protein 1 [Source:HGNC Symbol;Acc:18538]	protein_coding	12.0471	12.0939	13.0478	13.4491	16.006	14.922	12.3963	14.7924	0.254944	0.0126265	0.000271276
ENSG00000102802	C13orf33	chromosome 13 open reading frame 33 [Source:HGNC Symbol;Acc:25926]	protein_coding	0.937802	0.684401	0.9722	0.40958	0.458163	0.543751	0.864801	0.470498	-0.878179	0.0127994	0.00016003
ENSG00000216819	RP1-40E16.8		pseudogene	12.4517	11.8368	13.0144	15.5102	14.7291	15.5773	12.4343	15.2722	0.29658	0.0128945	0.000106883
ENSG00000144354	CDCA7	cell division cycle associated 7 [Source:HGNC Symbol;Acc:14628]	protein_coding	3.29852	3.28153	3.7206	4.04403	3.92746	4.53798	3.43355	4.16982	0.280285	0.0122879	0.000720415
ENSG00000172935	MRGPRF	MAS-related GPR, member F [Source:HGNC Symbol;Acc:24828]	protein_coding	25.8979	23.4523	26.1618	28.0187	27.3611	31.1459	25.1707	28.8419	0.196423	0.0119505	0.00119196
ENSG00000138735	PDE5A	phosphodiesterase 5A, cGMP-specific [Source:HGNC Symbol;Acc:8784]	protein_coding	77.3149	79.0855	72.2266	58.801	66.9415	58.6071	76.209	61.4499	-0.310551	0.0125138	0.000751365
ENSG00000113742	CPEB4	cytoplasmic polyadenylation element binding protein 4 [Source:HGNC Symbol;Acc:21747]	protein_coding	3.60715	3.64952	3.44428	2.98077	2.97572	2.74866	3.56698	2.90172	-0.297798	0.0119505	0.00132402
ENSG00000172986	GXYLT2	glucoside xylosyltransferase 2 [Source:HGNC Symbol;Acc:33383]	protein_coding	3.88562	4.05215	3.70469	2.91677	3.08782	2.95849	3.88082	2.98769	-0.377332	0.0130457	0.000295569
ENSG00000204775	AC145291.1	KM-PA-2 protein; Uncharacterized protein [Source:UniProtKB/TrEMBL;Acc:Q96Q25]	protein_coding	9.17479	8.17673	8.42776	10.6961	9.46165	10.3361	8.59309	10.1646	0.242304	0.0119505	0.0014338
ENSG00000170581	STAT2	signal transducer and activator of transcription 2, 113kDa [Source:HGNC Symbol;Acc:11363]	protein_coding	33.9498	33.7145	33.5576	29.5032	26.7662	28.7241	33.7406	28.3312	-0.252097	0.0117162	0.00170152
ENSG00000066855	MTFR1	mitochondrial fission regulator 1 [Source:HGNC Symbol;Acc:29510]	protein_coding	6.2504	6.14373	6.54045	5.14024	5.14978	5.02491	6.31152	5.10498	-0.306084	0.0131908	0.000275596
ENSG00000162302	RPS6KA4	ribosomal protein S6 kinase, 90kDa, polypeptide 4 [Source:HGNC Symbol;Acc:10433]	protein_coding	12.3811	11.3525	12.056	13.2976	13.1351	14.234	11.9298	13.5556	0.18431	0.0125194	0.000947876
ENSG00000163481	RNF25	ring finger protein 25 [Source:HGNC Symbol;Acc:14662]	protein_coding	9.63867	9.38504	10.3505	11.346	11.5375	11.4803	9.79139	11.4546	0.226339	0.0133096	0.000189743
ENSG00000187257	RSBN1L	round spermatid basic protein 1-like [Source:HGNC Symbol;Acc:24765]	protein_coding	4.18593	3.95662	4.23715	3.36883	3.13079	3.04775	4.12657	3.18246	-0.374801	0.0132717	0.000237897
ENSG00000198517	MAFK	v-maf musculoaponeurotic fibrosarcoma oncogene homolog K (avian) [Source:HGNC Symbol;Acc:6782]	protein_coding	11.0368	9.11153	9.70565	7.95413	6.98169	8.05844	9.95133	7.66475	-0.376651	0.0131872	0.000356376
ENSG00000156931	VPS8	vacuolar protein sorting 8 homolog (S. cerevisiae) [Source:HGNC Symbol;Acc:29122]	protein_coding	5.9124	5.6227	5.35772	4.72399	4.77555	4.47774	5.63094	4.65909	-0.273327	0.0109748	0.00259924
ENSG00000133112	TPT1	tumor protein, translationally-controlled 1 [Source:HGNC Symbol;Acc:12022]	protein_coding	591.01	606.348	649.625	510.848	538.009	535.114	615.661	527.99	-0.221625	0.00699625	0.0066317
ENSG00000148344	PTGES	prostaglandin E synthase [Source:HGNC Symbol;Acc:9599]	protein_coding	0.687764	0.576491	0.770444	0.305521	0.367737	0.24626	0.678233	0.306506	-1.14586	0.0136379	3.23759e-05
ENSG00000089597	GANAB	glucosidase, alpha; neutral AB [Source:HGNC Symbol;Acc:4138]	protein_coding	143.686	152.713	148.078	159.995	165.323	163.734	148.159	163.017	0.137876	0.011052	0.00271669
ENSG00000197386	HTT	huntingtin [Source:HGNC Symbol;Acc:4851]	protein_coding	5.21011	5.55672	4.60207	5.96735	6.03101	5.7362	5.12297	5.91152	0.206549	0.00965237	0.00427053
ENSG00000125772	GPCPD1	glycerophosphocholine phosphodiesterase GDE1 homolog (S. cerevisiae) [Source:HGNC Symbol;Acc:26957]	protein_coding	4.32034	4.00096	4.68228	3.63501	3.01728	3.38431	4.33453	3.34553	-0.373639	0.0133037	0.000655989
ENSG00000042088	TDP1	tyrosyl-DNA phosphodiesterase 1 [Source:HGNC Symbol;Acc:18884]	protein_coding	2.65339	2.69248	2.67215	3.0728	3.35334	3.14784	2.67267	3.19133	0.255873	0.0138919	0.000163196
ENSG00000181804	SLC9A9	solute carrier family 9, subfamily A (NHE9, cation proton antiporter 9), member 9 [Source:HGNC Symbol;Acc:20653]	protein_coding	2.74153	2.8826	2.99226	2.11891	2.22844	2.19456	2.87213	2.18063	-0.397374	0.0138919	0.00016746
ENSG00000140181	HERC2P2	hect domain and RLD 2 pseudogene 2 [Source:HGNC Symbol;Acc:4870]	pseudogene	5.32223	5.55174	5.02214	6.00181	6.17539	5.94907	5.2987	6.04209	0.189408	0.0123869	0.00168795
ENSG00000143321	HDGF	hepatoma-derived growth factor [Source:HGNC Symbol;Acc:4856]	protein_coding	53.0025	54.9826	58.4536	61.1693	61.6212	61.2859	55.4796	61.3588	0.145313	0.01129	0.00280819
ENSG00000173080	RXFP4	relaxin/insulin-like family peptide receptor 4 [Source:HGNC Symbol;Acc:14666]	protein_coding	0.305282	0.206222	0.203946	0	0.0243361	0.0479323	0.238483	0.0240895	-3.30741	0.014035	9.45515e-05
ENSG00000013293	SLC7A14	solute carrier family 7 (orphan transporter), member 14 [Source:HGNC Symbol;Acc:29326]	protein_coding	4.66797	5.20396	4.30389	3.70861	3.78271	3.33915	4.72527	3.61016	-0.388336	0.0131908	0.000970289
ENSG00000143479	DYRK3	dual-specificity tyrosine-(Y)-phosphorylation regulated kinase 3 [Source:HGNC Symbol;Acc:3094]	protein_coding	3.66457	3.72592	3.69866	2.8987	2.91587	2.45481	3.69638	2.75646	-0.423298	0.0140555	0.000134337
ENSG00000005700	IBTK	inhibitor of Bruton agammaglobulinemia tyrosine kinase [Source:HGNC Symbol;Acc:17853]	protein_coding	13.4957	13.3786	13.4219	10.7948	11.847	10.6876	13.4321	11.1098	-0.273851	0.0135394	0.000675862
ENSG00000102024	PLS3	plastin 3 [Source:HGNC Symbol;Acc:9091]	protein_coding	51.9993	54.7986	56.6168	59.7934	62.1825	58.9001	54.4716	60.292	0.146464	0.0105623	0.0037627
ENSG00000160214	RRP1	ribosomal RNA processing 1 homolog (S. cerevisiae) [Source:HGNC Symbol;Acc:18785]	protein_coding	5.54779	5.35353	5.77328	6.66032	6.334	6.3599	5.5582	6.45141	0.214996	0.0139696	0.00043105
ENSG00000110048	OSBP	oxysterol binding protein [Source:HGNC Symbol;Acc:8503]	protein_coding	17.6803	17.1427	16.7195	14.322	14.5387	14.5728	17.1809	14.4778	-0.246955	0.0132717	0.00115051
ENSG00000184374	COLEC10	collectin sub-family member 10 (C-type lectin) [Source:HGNC Symbol;Acc:2220]	protein_coding	8.68444	9.79991	10.2691	11.298	11.8738	11.6275	9.58447	11.5998	0.275323	0.0141062	0.000324264
ENSG00000099365	STX1B	syntaxin 1B [Source:HGNC Symbol;Acc:18539]	protein_coding	4.07559	3.55063	3.53846	4.45285	4.18235	4.48443	3.72156	4.37321	0.232786	0.0130232	0.0014212
ENSG00000164054	SHISA5	shisa homolog 5 (Xenopus laevis) [Source:HGNC Symbol;Acc:30376]	protein_coding	40.6195	39.1457	41.3511	44.3086	43.719	45.6536	40.3721	44.5604	0.142404	0.0133543	0.0011194
ENSG00000147119	CHST7	carbohydrate (N-acetylglucosamine 6-O) sulfotransferase 7 [Source:HGNC Symbol;Acc:13817]	protein_coding	3.36251	2.59405	3.03767	3.68754	3.89888	4.9195	2.99808	4.16864	0.47554	0.0141543	0.000331337
ENSG00000088325	TPX2	TPX2, microtubule-associated, homolog (Xenopus laevis) [Source:HGNC Symbol;Acc:1249]	protein_coding	21.5179	22.8709	22.3835	23.9248	25.4136	25.6444	22.2574	24.9943	0.16731	0.0134209	0.00113161
ENSG00000106397	PLOD3	procollagen-lysine, 2-oxoglutarate 5-dioxygenase 3 [Source:HGNC Symbol;Acc:9083]	protein_coding	39.1565	38.5192	38.3205	43.7965	40.7283	43.1092	38.6654	42.5447	0.137934	0.0108773	0.00369288
ENSG00000136827	TOR1A	torsin family 1, member A (torsin A) [Source:HGNC Symbol;Acc:3098]	protein_coding	15.9663	16.6718	17.2774	18.1084	19.8143	18.5796	16.6385	18.8341	0.178822	0.0131174	0.001528
ENSG00000172164	SNTB1	syntrophin, beta 1 (dystrophin-associated protein A1, 59kDa, basic component 1) [Source:HGNC Symbol;Acc:11168]	protein_coding	5.21832	5.25849	5.35201	4.35105	4.24931	4.33126	5.27627	4.31054	-0.291651	0.0143584	0.000310946
ENSG00000101361	NOP56	NOP56 ribonucleoprotein homolog (yeast) [Source:HGNC Symbol;Acc:15911]	protein_coding	20.0142	19.3467	21.6123	22.4871	21.9728	23.5771	20.3244	22.679	0.158146	0.0122175	0.00251723
ENSG00000196498	NCOR2	nuclear receptor corepressor 2 [Source:HGNC Symbol;Acc:7673]	protein_coding	12.4145	12.0927	10.019	13.8049	12.8779	13.1436	11.5088	13.2755	0.206032	0.00426951	0.0104839
ENSG00000105011	ASF1B	ASF1 anti-silencing function 1 homolog B (S. cerevisiae) [Source:HGNC Symbol;Acc:20996]	protein_coding	4.56919	4.03884	4.24788	4.87573	5.48343	6.19875	4.2853	5.5193	0.365088	0.0145213	0.000303653
ENSG00000176928	GCNT4	glucosaminyl (N-acetyl) transferase 4, core 2 [Source:HGNC Symbol;Acc:17973]	protein_coding	3.52668	3.42183	2.8569	4.16051	4.57786	3.87679	3.26847	4.20505	0.363508	0.0143584	0.000493015
ENSG00000101367	MAPRE1	microtubule-associated protein, RP/EB family, member 1 [Source:HGNC Symbol;Acc:6890]	protein_coding	63.5976	63.61	66.5279	70.1883	71.8868	72.2389	64.5785	71.438	0.145638	0.0139696	0.000886213
ENSG00000163739	CXCL1	chemokine (C-X-C motif) ligand 1 (melanoma growth stimulating activity, alpha) [Source:HGNC Symbol;Acc:4602]	protein_coding	0.343571	0.364707	0.180341	0.0638524	0.0215195	0.0635769	0.296206	0.0496496	-2.57675	0.0147571	0.000135668
ENSG00000162520	SYNC	syncoilin, intermediate filament protein [Source:HGNC Symbol;Acc:28897]	protein_coding	14.2844	13.9049	14.1369	17.2288	16.3613	15.1299	14.1087	16.24	0.202966	0.0139576	0.000978969
ENSG00000103066	PLA2G15	phospholipase A2, group XV [Source:HGNC Symbol;Acc:17163]	protein_coding	7.80527	7.3167	7.85164	8.79939	8.77818	8.70075	7.65787	8.75944	0.193895	0.0145213	0.000424449
ENSG00000177542	SLC25A22	solute carrier family 25 (mitochondrial carrier: glutamate), member 22 [Source:HGNC Symbol;Acc:19954]	protein_coding	6.55157	5.89003	6.30776	7.29715	6.86938	7.41846	6.24978	7.195	0.203187	0.0139148	0.00105477
ENSG00000134250	NOTCH2	notch 2 [Source:HGNC Symbol;Acc:7882]	protein_coding	16.0232	17.4731	14.0273	18.4789	19.2429	17.7534	15.8412	18.4917	0.223196	0.00967879	0.0053028
ENSG00000105063	PPP6R1	protein phosphatase 6, regulatory subunit 1 [Source:HGNC Symbol;Acc:29195]	protein_coding	26.4813	25.0366	24.362	28.4443	27.1781	28.6925	25.2933	28.105	0.152069	0.0119505	0.00305187
ENSG00000088826	SMOX	spermine oxidase [Source:HGNC Symbol;Acc:15862]	protein_coding	7.71911	7.00928	7.99304	6.06741	5.72742	6.28363	7.57381	6.02615	-0.329782	0.0141897	0.000812852
ENSG00000152291	TGOLN2	trans-golgi network protein 2 [Source:HGNC Symbol;Acc:15450]	protein_coding	49.5836	51.6732	49.0677	55.5572	56.1567	53.7351	50.1082	55.1497	0.138307	0.0104263	0.00462897
ENSG00000119950	MXI1	MAX interactor 1 [Source:HGNC Symbol;Acc:7534]	protein_coding	2.57563	2.58319	2.73087	1.84024	2.15041	2.05856	2.62989	2.0164	-0.383222	0.0145213	0.000592882
ENSG00000228589	RP5-1053E7.1		pseudogene	18.8195	17.48	21.1767	14.8734	14.9966	15.7234	19.1587	15.1978	-0.334136	0.0139473	0.00117098
ENSG00000060491	OGFR	opioid growth factor receptor [Source:HGNC Symbol;Acc:15768]	protein_coding	8.55661	7.85337	8.12087	9.38051	8.74281	9.93585	8.17695	9.35306	0.193875	0.0133543	0.00178876
ENSG00000139263	LRIG3	leucine-rich repeats and immunoglobulin-like domains 3 [Source:HGNC Symbol;Acc:30991]	protein_coding	4.92752	4.82746	5.16088	3.98106	4.11736	4.00816	4.97195	4.03553	-0.301055	0.0147652	0.00037782
ENSG00000225972	MTND1P23	MT-ND1 pseudogene 23 [Source:HGNC Symbol;Acc:42092]	pseudogene	381.231	339.327	401.474	294.584	254.976	311.642	374.011	287.067	-0.38169	0.0150741	0.000142015
ENSG00000171951	SCG2	secretogranin II [Source:HGNC Symbol;Acc:10575]	protein_coding	0.994268	0.977827	1.22491	1.43805	1.76423	1.44448	1.06567	1.54892	0.539502	0.015073	0.000283247
ENSG00000160323	ADAMTS13	ADAM metallopeptidase with thrombospondin type 1 motif, 13 [Source:HGNC Symbol;Acc:1366]	protein_coding	1.05514	0.829665	1.08205	0.64276	0.616823	0.776181	0.98895	0.678588	-0.543361	0.0140731	0.00129433
ENSG00000080845	DLGAP4	discs, large (Drosophila) homolog-associated protein 4 [Source:HGNC Symbol;Acc:24476]	protein_coding	13.5376	12.5876	11.8736	14.554	13.5749	14.5342	12.6662	14.221	0.167037	0.0103558	0.00502381
ENSG00000141985	SH3GL1	SH3-domain GRB2-like 1 [Source:HGNC Symbol;Acc:10830]	protein_coding	48.3649	44.0688	45.7639	51.9986	49.7438	51.303	46.0658	51.0151	0.147228	0.0123253	0.00309359
ENSG00000120696	KBTBD7	kelch repeat and BTB (POZ) domain containing 7 [Source:HGNC Symbol;Acc:25266]	protein_coding	1.04135	1.04836	1.00593	1.4334	1.31375	1.3576	1.03188	1.36825	0.407055	0.0153421	0.000138453
ENSG00000090863	GLG1	golgi glycoprotein 1 [Source:HGNC Symbol;Acc:4316]	protein_coding	37.5564	39.0996	35.9822	41.7359	41.4805	41.1547	37.5461	41.457	0.142955	0.0108683	0.0046201
ENSG00000176142	TMEM39A	transmembrane protein 39A [Source:HGNC Symbol;Acc:25600]	protein_coding	11.7904	11.8763	12.1068	9.8262	10.3493	9.7542	11.9245	9.97656	-0.257316	0.014035	0.00148431
ENSG00000246859	STARD4-AS1	STARD4 antisense RNA 1 [Source:HGNC Symbol;Acc:44117]	lincRNA	2.12896	2.10822	1.94009	2.60846	2.71138	2.31025	2.05909	2.54336	0.30473	0.0147662	0.000757829
ENSG00000134970	TMED7	transmembrane emp24 protein transport domain containing 7 [Source:HGNC Symbol;Acc:24253]	protein_coding	40.2421	38.0076	40.6943	33.508	33.4327	34.1869	39.648	33.7092	-0.234104	0.0139473	0.00160558
ENSG00000213699	C2orf18	chromosome 2 open reading frame 18 [Source:HGNC Symbol;Acc:26055]	protein_coding	19.334	18.9497	18.3962	15.4923	14.4306	16.6044	18.8933	15.5091	-0.284758	0.014468	0.00110368
ENSG00000123908	EIF2C2	eukaryotic translation initiation factor 2C, 2 [Source:HGNC Symbol;Acc:3263]	protein_coding	6.4546	7.10974	5.2992	8.44853	7.58513	7.50967	6.28785	7.84777	0.319718	0.0133037	0.00235834
ENSG00000110218	PANX1	pannexin 1 [Source:HGNC Symbol;Acc:8599]	protein_coding	23.1444	25.2952	23.1274	26.3365	28.1914	26.7808	23.8557	27.1029	0.184116	0.0136311	0.00207187
ENSG00000100354	TNRC6B	trinucleotide repeat containing 6B [Source:HGNC Symbol;Acc:29190]	protein_coding	1.63799	1.63798	1.41268	1.21634	1.30955	1.2183	1.56288	1.24806	-0.324517	0.013213	0.00255351
ENSG00000179988	PSTK	phosphoseryl-tRNA kinase [Source:HGNC Symbol;Acc:28578]	protein_coding	0.806282	0.647352	0.795029	0.565947	0.455367	0.483847	0.749555	0.50172	-0.57915	0.0152701	0.000498208
ENSG00000111615	KRR1	KRR1, small subunit (SSU) processome component, homolog (yeast) [Source:HGNC Symbol;Acc:5176]	protein_coding	6.87326	7.0432	7.17034	5.76332	5.81371	5.62611	7.02893	5.73438	-0.293668	0.0153132	0.000487145
ENSG00000109572	CLCN3	chloride channel, voltage-sensitive 3 [Source:HGNC Symbol;Acc:2021]	protein_coding	10.732	10.7964	10.3827	9.02118	9.1878	8.59217	10.637	8.93372	-0.251764	0.0133393	0.00248885
ENSG00000112319	EYA4	eyes absent homolog 4 (Drosophila) [Source:HGNC Symbol;Acc:3522]	protein_coding	4.082	4.02865	4.06889	3.33345	3.32133	3.3229	4.05985	3.32589	-0.287684	0.0155171	0.000322423
ENSG00000117114	LPHN2	latrophilin 2 [Source:HGNC Symbol;Acc:18582]	protein_coding	1.96367	2.11009	1.7019	1.50178	1.48776	1.33388	1.92522	1.44114	-0.417811	0.0140379	0.00180571
ENSG00000152492	CCDC50	coiled-coil domain containing 50 [Source:HGNC Symbol;Acc:18111]	protein_coding	26.973	25.2619	26.9198	29.0201	30.3441	28.1756	26.3849	29.1799	0.145265	0.0127994	0.00308932
ENSG00000083817	ZNF416	zinc finger protein 416 [Source:HGNC Symbol;Acc:20645]	protein_coding	1.26814	1.14254	1.22313	1.72401	1.7681	1.68646	1.21127	1.72619	0.511072	0.0159078	5.03793e-05
ENSG00000089685	BIRC5	baculoviral IAP repeat containing 5 [Source:HGNC Symbol;Acc:593]	protein_coding	14.6468	13.778	15.8361	16.4563	16.7765	17.2175	14.7536	16.8168	0.188831	0.014805	0.00130268
ENSG00000114423	CBLB	Cbl proto-oncogene, E3 ubiquitin protein ligase B [Source:HGNC Symbol;Acc:1542]	protein_coding	1.00012	0.948394	0.981216	0.779979	0.73006	0.698613	0.976577	0.736217	-0.407602	0.0160818	0.000205145
ENSG00000008130	NADK	NAD kinase [Source:HGNC Symbol;Acc:29831]	protein_coding	10.585	9.58971	10.1813	11.5247	10.7251	11.8494	10.1187	11.3664	0.167757	0.0128323	0.00347954
ENSG00000071967	CYBRD1	cytochrome b reductase 1 [Source:HGNC Symbol;Acc:20797]	protein_coding	38.1216	37.1206	37.5633	32.707	32.1944	30.9674	37.6018	31.9562	-0.234705	0.0138388	0.00249697
ENSG00000106263	EIF3B	eukaryotic translation initiation factor 3, subunit B [Source:HGNC Symbol;Acc:3280]	protein_coding	20.0344	19.6003	20.0541	21.6555	21.1773	23.0617	19.8963	21.9648	0.142695	0.0142375	0.00210758
ENSG00000040199	PHLPP2	PH domain and leucine rich repeat protein phosphatase 2 [Source:HGNC Symbol;Acc:29149]	protein_coding	1.92856	2.07229	1.95911	2.30561	2.17746	2.42955	1.98665	2.30421	0.213931	0.0151117	0.00130287
ENSG00000231672	DIRC3	disrupted in renal carcinoma 3 [Source:HGNC Symbol;Acc:17805]	protein_coding	0.449972	0.417947	0.444648	0.643041	0.747299	0.624076	0.437522	0.671472	0.61797	0.0163497	7.14892e-05
ENSG00000163486	SRGAP2	SLIT-ROBO Rho GTPase activating protein 2 [Source:HGNC Symbol;Acc:19751]	protein_coding	8.03686	7.46486	7.6594	6.4645	6.35648	6.58527	7.72038	6.46875	-0.255185	0.0152701	0.00127777
ENSG00000100243	CYB5R3	cytochrome b5 reductase 3 [Source:HGNC Symbol;Acc:2873]	protein_coding	65.9686	63.4694	64.8086	70.5504	69.9075	72.4175	64.7489	70.9584	0.132119	0.0149863	0.00156861
ENSG00000131462	TUBG1	tubulin, gamma 1 [Source:HGNC Symbol;Acc:12417]	protein_coding	24.4942	24.3575	24.9731	27.6302	27.0449	28.7194	24.6083	27.7982	0.175849	0.01594	0.000620437
ENSG00000137807	KIF23	kinesin family member 23 [Source:HGNC Symbol;Acc:6392]	protein_coding	8.69084	8.86933	8.68896	9.61229	11.1469	9.88317	8.74971	10.2141	0.22326	0.0161117	0.000482731
ENSG00000088256	GNA11	guanine nucleotide binding protein (G protein), alpha 11 (Gq class) [Source:HGNC Symbol;Acc:4379]	protein_coding	27.0849	25.8972	23.8734	29.7692	28.5354	29.1506	25.6185	29.1517	0.186395	0.0138534	0.00275395
ENSG00000157540	DYRK1A	dual-specificity tyrosine-(Y)-phosphorylation regulated kinase 1A [Source:HGNC Symbol;Acc:3091]	protein_coding	6.36748	6.17111	6.21879	5.23949	4.9275	5.35821	6.25246	5.17507	-0.272847	0.015643	0.000970289
ENSG00000127124	HIVEP3	human immunodeficiency virus type I enhancer binding protein 3 [Source:HGNC Symbol;Acc:13561]	protein_coding	0.344344	0.315683	0.254689	0.462517	0.399986	0.388112	0.304905	0.416872	0.451243	0.0152987	0.00132513
ENSG00000054523	KIF1B	kinesin family member 1B [Source:HGNC Symbol;Acc:16636]	protein_coding	4.54126	4.71068	4.19774	5.1157	5.8096	5.06434	4.48323	5.32988	0.249566	0.0163055	0.00032308
ENSG00000173320	STOX2	storkhead box 2 [Source:HGNC Symbol;Acc:25450]	protein_coding	0.548861	0.650059	0.554855	0.404243	0.430358	0.403753	0.584591	0.412784	-0.50204	0.0160752	0.000556148
ENSG00000132003	ZSWIM4	zinc finger, SWIM-type containing 4 [Source:HGNC Symbol;Acc:25704]	protein_coding	4.52999	3.81706	4.03656	5.24924	4.48963	5.08897	4.12787	4.94261	0.259876	0.0145213	0.00214092
ENSG00000101871	MID1	midline 1 (Opitz/BBB syndrome) [Source:HGNC Symbol;Acc:7095]	protein_coding	6.60133	6.83793	6.19507	5.30802	5.58226	5.3958	6.54477	5.42869	-0.269738	0.0135394	0.00318172
ENSG00000258486	RN7SL1	RNA, 7SL, cytoplasmic 1 [Source:HGNC Symbol;Acc:10038]	antisense	20.2491	32.3969	43.8229	59.8578	227.948	30.8526	32.1563	106.219	1.72387	0.0131908	0.00353243
ENSG00000136295	TTYH3	tweety homolog 3 (Drosophila) [Source:HGNC Symbol;Acc:22222]	protein_coding	55.8363	53.3998	50.1745	60.7447	55.9195	63.0369	53.1369	59.9004	0.172852	0.0130232	0.00381056
ENSG00000087053	MTMR2	myotubularin related protein 2 [Source:HGNC Symbol;Acc:7450]	protein_coding	7.6412	7.94808	7.60986	8.73582	8.71735	8.74035	7.73305	8.73117	0.175139	0.016073	0.000943557
ENSG00000248498	ASNSP1	asparagine synthetase pseudogene 1 [Source:HGNC Symbol;Acc:754]	pseudogene	0.633633	0.425054	0.646713	0.251876	0.185208	0.258389	0.568467	0.231824	-1.29404	0.0169409	8.56066e-05
ENSG00000175305	CCNE2	cyclin E2 [Source:HGNC Symbol;Acc:1590]	protein_coding	0.860373	0.940163	0.936428	1.16162	1.36308	1.24246	0.912321	1.25572	0.460901	0.0169147	0.000140009
ENSG00000245571	AP001258.4		lincRNA	1.46699	1.37375	1.54636	1.9554	2.25644	1.82755	1.46237	2.01313	0.461135	0.0167489	0.000323785
ENSG00000101193	GID8	GID complex subunit 8 homolog (S. cerevisiae) [Source:HGNC Symbol;Acc:15857]	protein_coding	11.0852	10.8015	11.1709	12.5104	12.2963	13.2368	11.0192	12.6811	0.20267	0.016727	0.000380858
ENSG00000185989	RASA3	RAS p21 protein activator 3 [Source:HGNC Symbol;Acc:20331]	protein_coding	25.7903	24.62	24.4758	28.6601	26.96	27.1875	24.962	27.6026	0.145067	0.0130232	0.0040887
ENSG00000101003	GINS1	GINS complex subunit 1 (Psf1 homolog) [Source:HGNC Symbol;Acc:28980]	protein_coding	1.75344	1.97412	2.1127	2.37988	2.42283	2.56298	1.94675	2.45523	0.334789	0.0168283	0.000343536
ENSG00000065060	UHRF1BP1	UHRF1 binding protein 1 [Source:HGNC Symbol;Acc:21216]	protein_coding	1.8933	1.95661	1.57295	1.39126	1.44772	1.27784	1.80762	1.37228	-0.397521	0.0143141	0.00286462
ENSG00000131089	ARHGEF9	Cdc42 guanine nucleotide exchange factor (GEF) 9 [Source:HGNC Symbol;Acc:14561]	protein_coding	2.61665	2.73145	2.39921	2.06479	2.08135	1.90977	2.58244	2.01863	-0.355354	0.0156922	0.00152272
ENSG00000228716	DHFR	dihydrofolate reductase [Source:HGNC Symbol;Acc:2861]	protein_coding	9.09638	8.95149	9.06474	9.76928	10.2284	11.0633	9.03754	10.3537	0.196139	0.0165814	0.00070328
ENSG00000163872	YEATS2	YEATS domain containing 2 [Source:HGNC Symbol;Acc:25489]	protein_coding	6.83668	7.49809	6.89772	8.0922	7.74761	8.07611	7.0775	7.97197	0.171698	0.0145993	0.00271044
ENSG00000169087	HSPBAP1	HSPB (heat shock 27kDa) associated protein 1 [Source:HGNC Symbol;Acc:16389]	protein_coding	1.2984	1.29291	1.39146	0.96631	0.887244	1.00002	1.32759	0.951192	-0.480998	0.0172354	0.000161632
ENSG00000051596	THOC3	THO complex 3 [Source:HGNC Symbol;Acc:19072]	protein_coding	6.07041	5.7501	6.17966	6.60914	7.19748	7.36775	6.00006	7.05812	0.234308	0.0170743	0.000339006
ENSG00000155876	RRAGA	Ras-related GTP binding A [Source:HGNC Symbol;Acc:16963]	protein_coding	66.659	63.7073	66.8334	69.4209	74.4107	77.8126	65.7332	73.8814	0.168588	0.0165661	0.000942986
ENSG00000105520	LPPR2	Lipid phosphate phosphatase-related protein type 2 [Source:UniProtKB/Swiss-Prot;Acc:Q96GM1]	protein_coding	23.8858	21.2528	21.0075	24.8744	24.7244	25.2967	22.0487	24.9652	0.179224	0.0152667	0.00232974
ENSG00000204257	HLA-DMA	major histocompatibility complex, class II, DM alpha [Source:HGNC Symbol;Acc:4934]	protein_coding	2.61866	2.28856	2.64599	1.74208	1.73264	1.9016	2.51774	1.79211	-0.490474	0.0173883	0.000255097
ENSG00000168386	FILIP1L	filamin A interacting protein 1-like [Source:HGNC Symbol;Acc:24589]	protein_coding	27.2313	28.354	25.8563	29.8412	33.5692	30.283	27.1472	31.2311	0.202183	0.016669	0.0011056
ENSG00000138182	KIF20B	kinesin family member 20B [Source:HGNC Symbol;Acc:7212]	protein_coding	4.7444	4.51866	4.2966	5.1764	5.73361	5.00664	4.51989	5.30555	0.231216	0.0167161	0.00109751
ENSG00000172086	KRCC1	lysine-rich coiled-coil 1 [Source:HGNC Symbol;Acc:28039]	protein_coding	19.9756	19.3122	20.2657	15.6017	17.1026	16.2943	19.8511	16.3329	-0.281445	0.0166377	0.00123607
ENSG00000144554	FANCD2	Fanconi anemia, complementation group D2 [Source:HGNC Symbol;Acc:3585]	protein_coding	1.58303	1.37869	1.54131	1.89152	1.72435	1.78993	1.50101	1.80193	0.263611	0.0168682	0.0010227
ENSG00000140464	PML	promyelocytic leukemia [Source:HGNC Symbol;Acc:9113]	protein_coding	4.72412	4.34355	4.45026	4.9379	4.94677	5.31858	4.50598	5.06775	0.169506	0.0160752	0.0018388
ENSG00000135750	KCNK1	potassium channel, subfamily K, member 1 [Source:HGNC Symbol;Acc:6272]	protein_coding	0.826101	0.850708	0.915554	0.484788	0.543296	0.581562	0.864121	0.536549	-0.687524	0.0179034	0.000113268
ENSG00000186432	KPNA4	karyopherin alpha 4 (importin alpha 3) [Source:HGNC Symbol;Acc:6397]	protein_coding	11.0724	10.7331	10.6147	11.7122	11.9491	12.3423	10.8067	12.0012	0.151248	0.0169098	0.0011186
ENSG00000114107	CEP70	centrosomal protein 70kDa [Source:HGNC Symbol;Acc:29972]	protein_coding	3.40998	3.26083	3.41648	2.65329	2.70628	2.46013	3.36243	2.60657	-0.367354	0.0177464	0.000344768
ENSG00000188375	H3F3C	H3 histone, family 3C [Source:HGNC Symbol;Acc:33164]	protein_coding	37.2718	35.601	40.3131	30.2955	30.4848	32.6296	37.7286	31.1366	-0.277047	0.0155258	0.00265963
ENSG00000103335	PIEZO1	piezo-type mechanosensitive ion channel component 1 [Source:HGNC Symbol;Acc:28993]	protein_coding	26.1544	24.2117	22.1162	29.3679	26.5911	27.3696	24.1608	27.7762	0.201184	0.0147652	0.00353217
ENSG00000059377	TBXAS1	thromboxane A synthase 1 (platelet) [Source:HGNC Symbol;Acc:11609]	protein_coding	5.86401	5.80064	5.67594	4.75309	4.50487	4.96296	5.7802	4.74031	-0.286138	0.0173139	0.00104778
ENSG00000105329	TGFB1	transforming growth factor, beta 1 [Source:HGNC Symbol;Acc:11766]	protein_coding	30.7346	29.8905	28.9362	34.9225	30.8062	39.4305	29.8538	35.0531	0.231627	0.0152516	0.00315712
ENSG00000101191	DIDO1	death inducer-obliterator 1 [Source:HGNC Symbol;Acc:2680]	protein_coding	5.57741	5.42735	5.09688	5.81655	6.02051	6.19162	5.36721	6.00956	0.163086	0.0159142	0.00252753
ENSG00000172840	PDP2	pyruvate dehyrogenase phosphatase catalytic subunit 2 [Source:HGNC Symbol;Acc:30263]	protein_coding	2.15688	2.38254	2.02044	2.86939	2.70344	2.47292	2.18662	2.68192	0.294561	0.0156584	0.00279414
ENSG00000161326	DUSP14	dual specificity phosphatase 14 [Source:HGNC Symbol;Acc:17007]	protein_coding	27.5286	26.6214	29.2503	30.3493	30.8355	32.2131	27.8001	31.1326	0.163337	0.0171335	0.00133077
ENSG00000077235	GTF3C1	general transcription factor IIIC, polypeptide 1, alpha 220kDa [Source:HGNC Symbol;Acc:4664]	protein_coding	12.0371	12.2743	11.1595	13.0781	13.2765	13.1421	11.8236	13.1656	0.155097	0.0149126	0.00357568
ENSG00000150627	WDR17	WD repeat domain 17 [Source:HGNC Symbol;Acc:16661]	protein_coding	1.05047	1.02449	0.935244	0.791049	0.690853	0.634994	1.0034	0.705632	-0.507907	0.0183802	0.000359195
ENSG00000214063	TSPAN4	tetraspanin 4 [Source:HGNC Symbol;Acc:11859]	protein_coding	30.6832	26.6129	29.8605	32.8687	31.4082	32.741	29.0522	32.3393	0.154642	0.0134724	0.00530802
ENSG00000108771	DHX58	DEXH (Asp-Glu-X-His) box polypeptide 58 [Source:HGNC Symbol;Acc:29517]	protein_coding	1.40267	1.36487	1.69749	1.00653	1.01522	0.922878	1.48834	0.981542	-0.600585	0.0185278	0.000273124
ENSG00000162892	IL24	interleukin 24 [Source:HGNC Symbol;Acc:11346]	protein_coding	1.04463	0.910569	1.03338	0.606323	0.591888	0.402472	0.996193	0.533561	-0.900772	0.0187293	8.56066e-05
ENSG00000136108	CKAP2	cytoskeleton associated protein 2 [Source:HGNC Symbol;Acc:1990]	protein_coding	9.30874	9.72357	10.0234	10.5339	11.2464	11.2987	9.68525	11.0263	0.187092	0.0179366	0.00087957
ENSG00000174010	KLHL15	kelch-like 15 (Drosophila) [Source:HGNC Symbol;Acc:29347]	protein_coding	1.9371	2.02531	1.95172	1.44804	1.50296	1.59396	1.97137	1.51499	-0.379896	0.0185181	0.000328936
ENSG00000125398	SOX9	SRY (sex determining region Y)-box 9 [Source:HGNC Symbol;Acc:11204]	protein_coding	14.5486	13.333	13.2304	11.6401	11.1202	11.3351	13.704	11.3651	-0.269982	0.0165613	0.00237146
ENSG00000108424	KPNB1	karyopherin (importin) beta 1 [Source:HGNC Symbol;Acc:6400]	protein_coding	81.0299	84.4133	80.9809	86.7015	91.5768	92.8978	82.1413	90.392	0.138087	0.0154554	0.00355859
ENSG00000184840	TMED9	transmembrane emp24 protein transport domain containing 9 [Source:HGNC Symbol;Acc:24878]	protein_coding	153.015	153.082	163.198	173.246	165.552	175.282	156.432	171.36	0.131499	0.0145835	0.00457216
ENSG00000019991	HGF	hepatocyte growth factor (hepapoietin A; scatter factor) [Source:HGNC Symbol;Acc:4893]	protein_coding	41.2234	42.4925	39.7975	44.1036	48.3908	45.2723	41.1711	45.9222	0.15756	0.01594	0.00322206
ENSG00000181788	SIAH2	siah E3 ubiquitin protein ligase 2 [Source:HGNC Symbol;Acc:10858]	protein_coding	6.80578	6.31011	6.66469	5.01196	4.92351	5.66726	6.59353	5.20091	-0.342287	0.0183849	0.000962037
ENSG00000111640	GAPDH	glyceraldehyde-3-phosphate dehydrogenase [Source:HGNC Symbol;Acc:4141]	protein_coding	889.489	948.607	983.625	996.586	1083.41	1057.07	940.574	1045.69	0.15284	0.0158871	0.00350886
ENSG00000149716	ORAOV1	oral cancer overexpressed 1 [Source:HGNC Symbol;Acc:17589]	protein_coding	2.96434	2.75694	2.93216	3.54511	3.08338	3.48648	2.88448	3.37166	0.225147	0.0179987	0.00142618
ENSG00000250588	IQCJ-SCHIP1	IQCJ-SCHIP1 readthrough [Source:HGNC Symbol;Acc:38842]	protein_coding	0.786285	0.509216	0.62287	0.957221	0.853945	1.13997	0.639457	0.983713	0.621389	0.0192397	0.000224712
ENSG00000115233	PSMD14	proteasome (prosome, macropain) 26S subunit, non-ATPase, 14 [Source:HGNC Symbol;Acc:16889]	protein_coding	10.7669	11.0367	12.2053	12.3893	12.7889	13.1618	11.3363	12.78	0.172935	0.0177464	0.0017262
ENSG00000122641	INHBA	inhibin, beta A [Source:HGNC Symbol;Acc:6066]	protein_coding	16.6372	17.0023	15.973	13.6896	14.3445	12.0005	16.5375	13.3449	-0.309454	0.0173883	0.00213417
ENSG00000186174	BCL9L	B-cell CLL/lymphoma 9-like [Source:HGNC Symbol;Acc:23688]	protein_coding	8.91678	8.91817	7.41002	10.1116	9.46495	9.43258	8.41499	9.66971	0.200512	0.00943266	0.0101035
ENSG00000213859	KCTD11	potassium channel tetramerisation domain containing 11 [Source:HGNC Symbol;Acc:21302]	protein_coding	6.25465	6.78742	6.71251	7.80468	7.18483	8.10184	6.58486	7.69712	0.225165	0.0179987	0.00153835
ENSG00000118960	HS1BP3	HCLS1 binding protein 3 [Source:HGNC Symbol;Acc:24979]	protein_coding	4.67295	4.50668	4.42792	3.92114	3.4419	3.31984	4.53585	3.56096	-0.349108	0.0190412	0.00051639
ENSG00000140153	WDR20	WD repeat domain 20 [Source:HGNC Symbol;Acc:19667]	protein_coding	2.97303	2.91462	3.06186	3.63059	3.22735	3.50437	2.98317	3.4541	0.211466	0.0180727	0.00161115
ENSG00000184381	PLA2G6	phospholipase A2, group VI (cytosolic, calcium-independent) [Source:HGNC Symbol;Acc:9039]	protein_coding	1.27658	1.26447	1.24135	0.940666	0.817699	0.994743	1.2608	0.917702	-0.458241	0.0194249	0.000351346
ENSG00000067798	NAV3	neuron navigator 3 [Source:HGNC Symbol;Acc:15998]	protein_coding	6.92706	7.17238	5.96144	8.41894	9.03667	7.68085	6.68696	8.37882	0.325396	0.0197283	7.12914e-05
ENSG00000120071	KANSL1	KAT8 regulatory NSL complex subunit 1 [Source:HGNC Symbol;Acc:24565]	protein_coding	7.51741	7.32815	7.19764	6.0264	6.22861	5.92133	7.34773	6.05878	-0.278271	0.0187293	0.00109663
ENSG00000085662	AKR1B1	aldo-keto reductase family 1, member B1 (aldose reductase) [Source:HGNC Symbol;Acc:381]	protein_coding	61.8137	60.7028	66.5059	53.5176	53.7966	54.4852	63.0075	53.9331	-0.224352	0.0151448	0.00469271
ENSG00000140829	DHX38	DEAH (Asp-Glu-Ala-His) box polypeptide 38 [Source:HGNC Symbol;Acc:17211]	protein_coding	11.049	11.3474	10.7657	12.4615	11.939	12.5759	11.054	12.3255	0.157072	0.0174642	0.00237753
ENSG00000148335	NTMT1	N-terminal Xaa-Pro-Lys N-methyltransferase 1 [Source:HGNC Symbol;Acc:23373]	protein_coding	19.5416	18.0487	20.2337	21.5725	20.8808	22.9351	19.2747	21.7961	0.177366	0.0173139	0.00262407
ENSG00000214135	AC024560.3		pseudogene	4.52279	4.36117	4.32139	4.98595	5.33574	5.41148	4.40178	5.24439	0.252687	0.0199167	0.000227865
ENSG00000251379	RP11-484O2.1		antisense	5.55033	5.3588	4.79653	3.70534	3.10592	3.62629	5.23522	3.47918	-0.589502	0.0200121	0.000211549
ENSG00000145439	CBR4	carbonyl reductase 4 [Source:HGNC Symbol;Acc:25891]	protein_coding	2.56431	2.43961	2.7157	2.05667	1.85018	2.01555	2.57321	1.97414	-0.382346	0.0197728	0.000460344
ENSG00000230787	PSAT1P3	phosphoserine aminotransferase 1 pseudogene 3 [Source:HGNC Symbol;Acc:43989]	pseudogene	1.05921	1.24972	0.78889	0.316561	0.326336	0.593308	1.03261	0.412068	-1.32533	0.0203377	4.24835e-05
ENSG00000196588	MKL1	megakaryoblastic leukemia (translocation) 1 [Source:HGNC Symbol;Acc:14334]	protein_coding	6.75141	6.41302	6.32095	7.06697	7.43279	7.55204	6.49513	7.3506	0.178504	0.0192397	0.00114576
ENSG00000151348	EXT2	exostosin 2 [Source:HGNC Symbol;Acc:3513]	protein_coding	37.7013	40.0422	38.213	42.2061	42.5303	42.8657	38.6522	42.534	0.138066	0.0167926	0.00365929
ENSG00000093009	CDC45	cell division cycle 45 homolog (S. cerevisiae) [Source:HGNC Symbol;Acc:1739]	protein_coding	4.30249	4.06893	4.45517	4.9576	5.1839	5.39461	4.27553	5.17871	0.276489	0.0202526	0.000212939
ENSG00000189410	SH2D5	SH2 domain containing 5 [Source:HGNC Symbol;Acc:28819]	protein_coding	13.5331	13.2044	13.4814	16.7919	15.562	14.2014	13.4063	15.5184	0.211072	0.0187293	0.00176011
ENSG00000166130	IKBIP	IKBKB interacting protein [Source:HGNC Symbol;Acc:26430]	protein_coding	24.547	22.956	25.8747	27.0889	26.6096	27.6302	24.4593	27.1096	0.148422	0.0170743	0.00342132
ENSG00000106344	RBM28	RNA binding motif protein 28 [Source:HGNC Symbol;Acc:21863]	protein_coding	8.15458	8.55362	8.68062	9.76596	10.2944	9.25336	8.46294	9.77126	0.207384	0.0188159	0.00174193
ENSG00000197879	MYO1C	myosin IC [Source:HGNC Symbol;Acc:7597]	protein_coding	80.9266	77.4106	74.1235	85.3576	82.1721	87.1659	77.4869	84.8985	0.131787	0.0125744	0.00815553
ENSG00000183751	TBL3	transducin (beta)-like 3 [Source:HGNC Symbol;Acc:11587]	protein_coding	5.2971	4.94078	5.04177	5.8219	5.45752	6.05936	5.09322	5.77959	0.18239	0.0185278	0.00221075
ENSG00000072062	PRKACA	protein kinase, cAMP-dependent, catalytic, alpha [Source:HGNC Symbol;Acc:9380]	protein_coding	24.9908	24.498	23.6662	26.9566	26.9985	27.2091	24.385	27.0547	0.149885	0.0191396	0.00167941
ENSG00000104853	CLPTM1	cleft lip and palate associated transmembrane protein 1 [Source:HGNC Symbol;Acc:2087]	protein_coding	46.8691	46.0025	47.3758	50.4897	50.6752	53.886	46.7491	51.6837	0.144769	0.0194242	0.00149721
ENSG00000248144	ADH1C	alcohol dehydrogenase 1C (class I), gamma polypeptide [Source:HGNC Symbol;Acc:251]	polymorphic_pseudogene	0.410385	0.39706	0.392678	0.066736	0.074971	0.177195	0.400041	0.106301	-1.912	0.0210255	8.46474e-07
ENSG00000068489	PRR11	proline rich 11 [Source:HGNC Symbol;Acc:25619]	protein_coding	10.7948	10.862	10.0979	11.9012	12.5542	12.5081	10.5849	12.3211	0.219132	0.0204322	0.00059547
ENSG00000198873	GRK5	G protein-coupled receptor kinase 5 [Source:HGNC Symbol;Acc:4544]	protein_coding	19.7086	19.834	20.2964	16.2966	16.8486	17.4464	19.9464	16.8639	-0.242189	0.0189813	0.00212782
ENSG00000133858	ZFC3H1	zinc finger, C3H1-type containing [Source:HGNC Symbol;Acc:28328]	protein_coding	8.70276	8.71574	8.27211	9.82421	10.4664	9.11153	8.56354	9.80071	0.194679	0.0193616	0.00178536
ENSG00000118655	DCLRE1B	DNA cross-link repair 1B [Source:HGNC Symbol;Acc:17641]	protein_coding	2.00193	1.94192	2.01689	2.50463	2.42084	2.53043	1.98692	2.4853	0.32289	0.0211294	0.000151248
ENSG00000123989	CHPF	chondroitin polymerizing factor [Source:HGNC Symbol;Acc:24291]	protein_coding	44.0849	38.4723	41.1487	45.1019	44.9104	47.4868	41.2353	45.8331	0.152508	0.0165613	0.00475767
ENSG00000163527	STT3B	STT3, subunit of the oligosaccharyltransferase complex, homolog B (S. cerevisiae) [Source:HGNC Symbol;Acc:30611]	protein_coding	42.0573	41.5405	42.2659	35.8595	36.3395	35.639	41.9546	35.946	-0.222998	0.0191861	0.00230272
ENSG00000197858	GPAA1	glycosylphosphatidylinositol anchor attachment protein 1 homolog (yeast) [Source:HGNC Symbol;Acc:4446]	protein_coding	34.8209	31.4299	33.5497	37.3703	34.8508	38.1774	33.2669	36.7995	0.145602	0.0145993	0.0069122
ENSG00000135678	CPM	carboxypeptidase M [Source:HGNC Symbol;Acc:2311]	protein_coding	1.58286	1.48588	1.49275	1.19159	1.17331	0.987801	1.5205	1.11757	-0.44418	0.0212901	0.000296451
ENSG00000198046	ZNF667	zinc finger protein 667 [Source:HGNC Symbol;Acc:28854]	protein_coding	1.2761	1.06433	1.01072	0.800422	0.725062	0.775886	1.11705	0.767124	-0.542165	0.0209612	0.000655989
ENSG00000164045	CDC25A	cell division cycle 25 homolog A (S. pombe) [Source:HGNC Symbol;Acc:1725]	protein_coding	1.49097	1.72928	1.74568	2.09042	2.03225	2.20149	1.65531	2.10805	0.34881	0.021261	0.000421856
ENSG00000149503	INCENP	inner centromere protein antigens 135/155kDa [Source:HGNC Symbol;Acc:6058]	protein_coding	5.7381	5.86466	4.98351	6.54455	6.81487	6.21391	5.52876	6.52444	0.238899	0.0190904	0.00260579
ENSG00000168477	TNXB	tenascin XB [Source:HGNC Symbol;Acc:11976]	protein_coding	0.150992	0.181151	0.156035	0.102309	0.0753961	0.106847	0.162726	0.0948507	-0.778717	0.0214869	0.00021465
ENSG00000118217	ATF6	activating transcription factor 6 [Source:HGNC Symbol;Acc:791]	protein_coding	11.7424	11.7641	11.7639	13.0868	13.372	12.6117	11.7568	13.0235	0.147623	0.0193616	0.00237146
ENSG00000167513	CDT1	chromatin licensing and DNA replication factor 1 [Source:HGNC Symbol;Acc:24576]	protein_coding	3.66099	3.06393	3.32787	3.88833	3.96268	4.37995	3.35093	4.07699	0.28294	0.0205096	0.0012307
ENSG00000166401	SERPINB8	serpin peptidase inhibitor, clade B (ovalbumin), member 8 [Source:HGNC Symbol;Acc:8952]	protein_coding	8.94898	9.0143	9.75622	7.67945	7.67511	7.57726	9.23983	7.64394	-0.27355	0.0201236	0.00165001
ENSG00000107819	SFXN3	sideroflexin 3 [Source:HGNC Symbol;Acc:16087]	protein_coding	16.4866	16.66	17.7766	18.5469	18.7354	19.4417	16.9744	18.908	0.155637	0.0203322	0.00146971
ENSG00000008083	JARID2	jumonji, AT rich interactive domain 2 [Source:HGNC Symbol;Acc:6196]	protein_coding	5.30001	5.22291	4.58938	4.05607	3.86516	4.2645	5.03743	4.06191	-0.31053	0.0186227	0.00327844
ENSG00000196396	PTPN1	protein tyrosine phosphatase, non-receptor type 1 [Source:HGNC Symbol;Acc:9642]	protein_coding	23.7297	22.677	23.3209	25.507	25.5658	26.329	23.2425	25.8006	0.150635	0.0210618	0.000970289
ENSG00000116017	ARID3A	AT rich interactive domain 3A (BRIGHT-like) [Source:HGNC Symbol;Acc:3031]	protein_coding	10.1073	8.65682	9.21097	10.8932	10.2934	10.9546	9.32503	10.7137	0.20028	0.0188159	0.00328466
ENSG00000146555	SDK1	sidekick cell adhesion molecule 1 [Source:HGNC Symbol;Acc:19307]	protein_coding	1.1973	1.22721	1.02956	0.934913	0.811701	0.86996	1.15136	0.872191	-0.400617	0.0198503	0.00229342
ENSG00000154760	SLFN13	schlafen family member 13 [Source:HGNC Symbol;Acc:26481]	protein_coding	0.702305	0.756818	0.814231	0.518923	0.544092	0.588814	0.757785	0.55061	-0.460758	0.0216359	0.000617293
ENSG00000073711	PPP2R3A	protein phosphatase 2, regulatory subunit B'', alpha [Source:HGNC Symbol;Acc:9307]	protein_coding	5.87491	5.71681	5.45619	6.52658	7.01588	6.13842	5.68264	6.56029	0.207199	0.0208021	0.00158466
ENSG00000113240	CLK4	CDC-like kinase 4 [Source:HGNC Symbol;Acc:13659]	protein_coding	1.18807	1.33465	1.31255	1.57694	1.55918	1.5528	1.27842	1.56297	0.289929	0.0220956	0.000416463
ENSG00000101152	DNAJC5	DnaJ (Hsp40) homolog, subfamily C, member 5 [Source:HGNC Symbol;Acc:16235]	protein_coding	21.581	21.5544	20.8098	23.6798	22.7993	24.0528	21.3151	23.5107	0.14144	0.0195074	0.00310659
ENSG00000005020	SKAP2	src kinase associated phosphoprotein 2 [Source:HGNC Symbol;Acc:15687]	protein_coding	7.49604	7.40137	7.53668	6.25517	6.24981	6.06524	7.47803	6.19007	-0.272702	0.0217381	0.000883055
ENSG00000055070	SZRD1	SUZ RNA binding domain containing 1 [Source:HGNC Symbol;Acc:30232]	protein_coding	28.4683	27.9046	28.5382	30.7381	31.2909	31.5327	28.3037	31.1872	0.139964	0.0214968	0.00115051
ENSG00000065308	TRAM2	translocation associated membrane protein 2 [Source:HGNC Symbol;Acc:16855]	protein_coding	55.2396	57.3677	52.4631	61.3428	58.7377	61.7292	55.0234	60.6032	0.139348	0.0147495	0.00793349
ENSG00000164761	TNFRSF11B	tumor necrosis factor receptor superfamily, member 11b [Source:HGNC Symbol;Acc:11909]	protein_coding	183.539	187.457	197.686	202.659	212.163	207.937	189.561	207.586	0.131053	0.0187588	0.00394952
ENSG00000044115	CTNNA1	catenin (cadherin-associated protein), alpha 1, 102kDa [Source:HGNC Symbol;Acc:2509]	protein_coding	54.6806	57.5569	55.2807	59.5318	62.7018	61.3473	55.8394	61.1936	0.132098	0.018074	0.00477273
ENSG00000184675	FAM123B	family with sequence similarity 123B [Source:HGNC Symbol;Acc:26837]	protein_coding	0.689363	0.738269	0.660916	0.857617	0.918299	0.92711	0.696182	0.901009	0.372076	0.0227599	0.000234384
ENSG00000138468	SENP7	SUMO1/sentrin specific peptidase 7 [Source:HGNC Symbol;Acc:30402]	protein_coding	3.39133	3.8012	3.54456	2.83023	2.9302	2.90712	3.57903	2.88918	-0.308906	0.0211302	0.00191622
ENSG00000147535	PPAPDC1B	phosphatidic acid phosphatase type 2 domain containing 1B [Source:HGNC Symbol;Acc:25026]	protein_coding	9.20857	8.88111	9.60383	7.7897	7.46197	7.64098	9.23117	7.63089	-0.274663	0.0219346	0.0012235
ENSG00000050344	NFE2L3	nuclear factor (erythroid-derived 2)-like 3 [Source:HGNC Symbol;Acc:7783]	protein_coding	21.5652	21.9908	22.9142	24.1702	25.0862	24.4803	22.1567	24.5789	0.149675	0.0216724	0.00167155
ENSG00000099250	NRP1	neuropilin 1 [Source:HGNC Symbol;Acc:8004]	protein_coding	18.2291	17.7347	17.4531	15.236	15.455	14.9491	17.8056	15.2134	-0.226993	0.0198503	0.0035865
ENSG00000159403	C1R	complement component 1, r subcomponent [Source:HGNC Symbol;Acc:1246]	protein_coding	41.9301	42.4435	43.7482	37.3101	35.5267	36.7061	42.7073	36.5143	-0.226022	0.0200102	0.0035865
ENSG00000155111	CDK19	cyclin-dependent kinase 19 [Source:HGNC Symbol;Acc:19338]	protein_coding	3.55885	3.4834	3.41819	2.85102	2.9747	2.6599	3.48681	2.82854	-0.301852	0.0219346	0.00177807
ENSG00000172037	LAMB2	laminin, beta 2 (laminin S) [Source:HGNC Symbol;Acc:6487]	protein_coding	73.2508	73.4981	66.9418	81.4237	76.0545	78.2869	71.2303	78.5884	0.141825	0.0119505	0.0118071
ENSG00000148297	MED22	mediator complex subunit 22 [Source:HGNC Symbol;Acc:11477]	protein_coding	4.7782	4.32391	5.01847	5.442	5.22971	5.36258	4.70686	5.34476	0.183362	0.0204251	0.00342994
ENSG00000203761	RP11-243J18.3		pseudogene	3.31626	2.87935	2.81446	2.08679	2.18098	2.35535	3.00336	2.20771	-0.444027	0.0229112	0.000978482
ENSG00000157593	SLC35B2	solute carrier family 35, member B2 [Source:HGNC Symbol;Acc:16872]	protein_coding	58.1721	57.9314	60.7358	66.6899	63.8748	63.9339	58.9464	64.8329	0.137321	0.0201344	0.00377082
ENSG00000069702	TGFBR3	transforming growth factor, beta receptor III [Source:HGNC Symbol;Acc:11774]	protein_coding	3.88832	3.87443	3.59873	3.15797	3.07767	2.68495	3.78716	2.97353	-0.34894	0.0228463	0.00109447
ENSG00000102900	NUP93	nucleoporin 93kDa [Source:HGNC Symbol;Acc:28958]	protein_coding	5.09045	5.1477	5.2086	5.57005	5.94135	5.87315	5.14891	5.79485	0.170503	0.0229275	0.00102596
ENSG00000171150	SOCS5	suppressor of cytokine signaling 5 [Source:HGNC Symbol;Acc:16852]	protein_coding	15.6497	15.8973	16.517	17.6059	17.313	18.4629	16.0214	17.7939	0.151391	0.0221713	0.00178572
ENSG00000167508	MVD	mevalonate (diphospho) decarboxylase [Source:HGNC Symbol;Acc:7529]	protein_coding	12.7166	12.0933	12.5421	10.2235	9.39494	10.9465	12.4506	10.1883	-0.289306	0.0227776	0.00121186
ENSG00000240350	AC017002.1		lincRNA	4.83165	4.3707	6.17495	3.36149	3.31576	3.15651	5.12577	3.27792	-0.644989	0.0235669	0.00055665
ENSG00000260359	RP11-4F5.2		lincRNA	1.72082	2.02144	1.85036	1.46832	1.18054	1.23253	1.86421	1.2938	-0.526953	0.0231701	0.00109624
ENSG00000168806	LCMT2	leucine carboxyl methyltransferase 2 [Source:HGNC Symbol;Acc:17558]	protein_coding	2.37132	2.40088	2.76667	2.92412	3.16341	3.51322	2.51296	3.20025	0.348799	0.0233181	0.000967668
ENSG00000145362	ANK2	ankyrin 2, neuronal [Source:HGNC Symbol;Acc:493]	protein_coding	0.517138	0.546641	0.45104	0.395279	0.372548	0.348841	0.50494	0.372223	-0.439944	0.0224563	0.00186091
ENSG00000177613	CSTF2T	cleavage stimulation factor, 3' pre-RNA, subunit 2, 64kDa, tau variant [Source:HGNC Symbol;Acc:17086]	protein_coding	5.39499	5.73714	5.37521	6.16768	6.32581	6.66411	5.50244	6.38587	0.21481	0.0234934	0.00086276
ENSG00000092929	UNC13D	unc-13 homolog D (C. elegans) [Source:HGNC Symbol;Acc:23147]	protein_coding	0.202902	0.100961	0.239633	0.065991	0.0444804	0.0813506	0.181165	0.0639407	-1.5025	0.0235534	0.00088064
ENSG00000239437	Metazoa_SRP	Metazoan signal recognition particle RNA [Source:RFAM;Acc:RF00017]	misc_RNA	0.736224	0.54706	1.48781	1.3409	9.94199	0.635769	0.923699	3.97289	2.10469	0.0199155	0.00462694
ENSG00000081377	CDC14B	CDC14 cell division cycle 14 homolog B (S. cerevisiae) [Source:HGNC Symbol;Acc:1719]	protein_coding	4.55007	4.37313	4.66852	3.82821	3.68051	3.80579	4.53057	3.7715	-0.264554	0.0233181	0.00127802
ENSG00000244754	N4BP2L2	NEDD4 binding protein 2-like 2 [Source:HGNC Symbol;Acc:26916]	protein_coding	8.99152	8.37322	8.69974	7.49876	7.25984	6.67514	8.68816	7.14458	-0.282202	0.0231911	0.00152407
ENSG00000033050	ABCF2	ATP-binding cassette, sub-family F (GCN20), member 2 [Source:HGNC Symbol;Acc:71]	protein_coding	19.6564	20.5886	20.4861	21.73	22.5283	23.2047	20.2437	22.4877	0.151662	0.0228256	0.00190585
ENSG00000101665	SMAD7	SMAD family member 7 [Source:HGNC Symbol;Acc:6773]	protein_coding	1.933	1.98978	2.22409	2.73509	2.52506	2.52109	2.04896	2.59374	0.340147	0.0241506	0.000639423
ENSG00000234693	RP4-530I15.6		antisense	2.2105	3.24831	3.12155	3.90586	4.19495	4.95742	2.86012	4.35274	0.605849	0.0246119	0.0002277
ENSG00000102595	UGGT2	UDP-glucose glycoprotein glucosyltransferase 2 [Source:HGNC Symbol;Acc:15664]	protein_coding	8.17065	8.26791	8.09362	9.56365	9.84694	8.63026	8.17739	9.34695	0.192855	0.0232516	0.00171328
ENSG00000184304	PRKD1	protein kinase D1 [Source:HGNC Symbol;Acc:9407]	protein_coding	6.77013	7.06434	6.89608	7.86446	8.05916	7.57588	6.91018	7.83317	0.180872	0.0232516	0.00180387
ENSG00000198890	PRMT6	protein arginine methyltransferase 6 [Source:HGNC Symbol;Acc:18241]	protein_coding	5.12479	4.41447	4.78468	5.37112	6.01986	5.85579	4.77465	5.74892	0.267898	0.0241272	0.00109751
ENSG00000234782	RP11-442A13.1		pseudogene	79.4815	85.2086	89.1656	69.0403	72.4905	69.9596	84.6186	70.4968	-0.263417	0.0205459	0.00470696
ENSG00000162337	LRP5	low density lipoprotein receptor-related protein 5 [Source:HGNC Symbol;Acc:6697]	protein_coding	11.3825	11.5309	10.2993	13.1734	12.1438	12.1553	11.0709	12.4909	0.174103	0.0179034	0.00740201
ENSG00000009844	VTA1	Vps20-associated 1 homolog (S. cerevisiae) [Source:HGNC Symbol;Acc:20954]	protein_coding	14.0925	13.9194	15.3818	15.8412	16.3313	16.6398	14.4646	16.2708	0.169759	0.0233181	0.00199346
ENSG00000143870	PDIA6	protein disulfide isomerase family A, member 6 [Source:HGNC Symbol;Acc:30168]	protein_coding	132.385	138.846	144.074	119.745	117.677	120.288	138.435	119.237	-0.215377	0.0172454	0.00807692
ENSG00000213983	AP1G2	adaptor-related protein complex 1, gamma 2 subunit [Source:HGNC Symbol;Acc:556]	protein_coding	1.94601	1.71328	1.81298	1.4818	1.23736	1.42563	1.82409	1.3816	-0.400842	0.0241333	0.00120887
ENSG00000198185	ZNF334	zinc finger protein 334 [Source:HGNC Symbol;Acc:15806]	protein_coding	2.11179	2.00395	2.46889	1.58179	1.54717	1.69733	2.19488	1.60877	-0.448186	0.0241506	0.00129303
ENSG00000177410	ZNFX1-AS1	ZNFX1 antisense RNA 1 [Source:HGNC Symbol;Acc:33101]	antisense	58.0722	54.1814	64.2096	48.0712	49.3718	48.9968	58.8211	48.8133	-0.26906	0.0210618	0.00448501
ENSG00000185630	PBX1	pre-B-cell leukemia homeobox 1 [Source:HGNC Symbol;Acc:8632]	protein_coding	2.3516	2.58049	2.2442	1.90126	2.01548	1.99886	2.39209	1.97187	-0.278713	0.020624	0.00502381
ENSG00000151632	AKR1C2	aldo-keto reductase family 1, member C2 (dihydrodiol dehydrogenase 2; bile acid binding protein; 3-alpha hydroxysteroid dehydrogenase, type III) [Source:HGNC Symbol;Acc:385]	protein_coding	1.66569	1.66848	1.77007	1.30443	1.19141	1.26355	1.70142	1.25313	-0.441203	0.0253627	0.000289023
ENSG00000101182	PSMA7	proteasome (prosome, macropain) subunit, alpha type, 7 [Source:HGNC Symbol;Acc:9536]	protein_coding	93.0338	90.4131	99.1983	100.911	101.07	110.614	94.2151	104.199	0.145306	0.0205459	0.00517234
ENSG00000260114	CTD-2574D22.4		sense_intronic	0.854668	0.624661	0.682118	1.18478	0.98288	1.18572	0.720482	1.1178	0.633622	0.0254069	0.000394616
ENSG00000196584	XRCC2	X-ray repair complementing defective repair in Chinese hamster cells 2 [Source:HGNC Symbol;Acc:12829]	protein_coding	0.832314	0.821774	0.957186	1.27463	1.13787	1.05265	0.870425	1.15505	0.408163	0.024474	0.00138081
ENSG00000100439	ABHD4	abhydrolase domain containing 4 [Source:HGNC Symbol;Acc:20154]	protein_coding	13.224	14.0266	13.675	11.0244	11.2917	11.8073	13.6419	11.3745	-0.262243	0.0232516	0.00263942
ENSG00000097021	ACOT7	acyl-CoA thioesterase 7 [Source:HGNC Symbol;Acc:24157]	protein_coding	12.8508	12.6312	13.5019	14.4665	14.538	14.4069	12.9946	14.4705	0.155196	0.0243646	0.00163712
ENSG00000196961	AP2A1	adaptor-related protein complex 2, alpha 1 subunit [Source:HGNC Symbol;Acc:561]	protein_coding	54.7018	51.8555	50.5902	57.2457	56.4719	58.5334	52.3825	57.417	0.132392	0.020624	0.00549853
ENSG00000151690	MFSD6	major facilitator superfamily domain containing 6 [Source:HGNC Symbol;Acc:24711]	protein_coding	3.25906	3.49734	2.9937	2.55558	2.51562	2.64133	3.25003	2.57084	-0.338214	0.0241494	0.00201253
ENSG00000249476	CTD-2587M2.1		lincRNA	0.406935	0.215984	0.320401	0.155038	0.152929	0.165665	0.31444	0.157878	-0.993979	0.0257333	0.000469687
ENSG00000085415	SEH1L	SEH1-like (S. cerevisiae) [Source:HGNC Symbol;Acc:30379]	protein_coding	9.09748	9.26801	9.31585	10.5183	10.3181	10.6082	9.22711	10.4815	0.183899	0.0254185	0.000824455
ENSG00000166250	CLMP	CXADR-like membrane protein [Source:HGNC Symbol;Acc:24039]	protein_coding	58.2989	62.7149	56.1908	49.259	50.7933	49.6355	59.0682	49.8959	-0.24346	0.0193297	0.00693508
ENSG00000124207	CSE1L	CSE1 chromosome segregation 1-like (yeast) [Source:HGNC Symbol;Acc:2431]	protein_coding	21.3318	21.0799	22.4601	23.1157	24.4416	24.3019	21.6239	23.9531	0.147581	0.024474	0.00189229
ENSG00000249348	UGDH-AS1	UGDH antisense RNA 1 [Source:HGNC Symbol;Acc:40601]	antisense	6.75583	6.01001	5.70258	4.98832	4.72325	4.08973	6.15614	4.60043	-0.420256	0.0251673	0.0012235
ENSG00000116132	PRRX1	paired related homeobox 1 [Source:HGNC Symbol;Acc:9142]	protein_coding	11.6443	11.2204	11.0859	9.48103	9.76765	9.60917	11.3169	9.61928	-0.234473	0.0237723	0.00267115
ENSG00000206053	HN1L	hematological and neurological expressed 1-like [Source:HGNC Symbol;Acc:14137]	protein_coding	13.6211	12.8809	14.0255	14.8957	15.0677	15.1669	13.5092	15.0434	0.155191	0.0247112	0.00175707
ENSG00000147100	SLC16A2	solute carrier family 16, member 2 (thyroid hormone transporter) [Source:HGNC Symbol;Acc:10923]	protein_coding	11.0812	10.6849	9.89402	11.9862	12.1245	11.4101	10.5534	11.8403	0.165997	0.0193297	0.00728059
ENSG00000100316	RPL3	ribosomal protein L3 [Source:HGNC Symbol;Acc:10332]	protein_coding	272.205	279.559	292.281	243.297	242.485	244.123	281.348	243.302	-0.20961	0.0195623	0.0071052
ENSG00000156642	NPTN	neuroplastin [Source:HGNC Symbol;Acc:17867]	protein_coding	38.7371	38.0557	42.3773	43.178	44.0556	44.0313	39.7234	43.755	0.139459	0.0220956	0.00477273
ENSG00000143153	ATP1B1	ATPase, Na+/K+ transporting, beta 1 polypeptide [Source:HGNC Symbol;Acc:804]	protein_coding	14.7788	13.8808	14.8597	16.1275	16.6918	16.1071	14.5064	16.3088	0.168955	0.0254244	0.00152272
ENSG00000104427	ZC2HC1A	zinc finger, C2HC-type containing 1A [Source:HGNC Symbol;Acc:24277]	protein_coding	4.13343	4.56521	5.02568	3.53928	3.29504	3.49156	4.57478	3.44196	-0.41047	0.025414	0.00154922
ENSG00000112406	HECA	headcase homolog (Drosophila) [Source:HGNC Symbol;Acc:21041]	protein_coding	3.05925	2.61525	2.68526	2.22212	2.10138	2.22109	2.78659	2.18153	-0.353159	0.0252342	0.00183079
ENSG00000138777	PPA2	pyrophosphatase (inorganic) 2 [Source:HGNC Symbol;Acc:28883]	protein_coding	8.50135	8.22001	9.52289	7.06794	7.48466	7.10532	8.74808	7.21931	-0.277106	0.0223801	0.00483711
ENSG00000174243	DDX23	DEAD (Asp-Glu-Ala-Asp) box polypeptide 23 [Source:HGNC Symbol;Acc:17347]	protein_coding	16.8021	18.8912	18.7853	20.2361	20.751	20.3016	18.1595	20.4296	0.169931	0.0241333	0.00317059
ENSG00000126822	PLEKHG3	pleckstrin homology domain containing, family G (with RhoGef domain) member 3 [Source:HGNC Symbol;Acc:20364]	protein_coding	0.691491	0.562855	0.594208	0.798024	0.805217	0.789766	0.616185	0.797669	0.372427	0.0267182	0.000593007
ENSG00000150051	MKX	mohawk homeobox [Source:HGNC Symbol;Acc:23729]	protein_coding	0.557573	0.381224	0.48372	0.287126	0.258045	0.23406	0.474172	0.259743	-0.868323	0.0270702	0.00026786
ENSG00000124181	PLCG1	phospholipase C, gamma 1 [Source:HGNC Symbol;Acc:9065]	protein_coding	18.5251	17.894	17.4161	20.4986	19.8867	18.9493	17.9451	19.7782	0.140322	0.0190412	0.00830314
ENSG00000146950	SHROOM2	shroom family member 2 [Source:HGNC Symbol;Acc:630]	protein_coding	0.296738	0.272039	0.346915	0.398572	0.452824	0.482547	0.305231	0.444648	0.542763	0.0272738	0.000276134
ENSG00000129911	KLF16	Kruppel-like factor 16 [Source:HGNC Symbol;Acc:16857]	protein_coding	8.3204	8.0353	8.15921	10.086	8.60062	10.3732	8.17164	9.68662	0.245368	0.0262106	0.00135782
ENSG00000142731	PLK4	polo-like kinase 4 [Source:HGNC Symbol;Acc:11397]	protein_coding	3.38486	3.40759	3.64376	4.02039	4.18151	4.12407	3.47873	4.10866	0.240105	0.0273465	0.000373259
ENSG00000071243	ING3	inhibitor of growth family, member 3 [Source:HGNC Symbol;Acc:14587]	protein_coding	2.22646	2.39095	2.34775	1.7379	1.82933	1.82785	2.32172	1.79836	-0.368512	0.0271546	0.000610231
ENSG00000142552	RCN3	reticulocalbin 3, EF-hand calcium binding domain [Source:HGNC Symbol;Acc:21145]	protein_coding	53.3457	47.9069	52.187	56.7055	53.6261	59.3919	51.1465	56.5745	0.145516	0.0193616	0.00845053
ENSG00000213523	SRA1	steroid receptor RNA activator 1 [Source:HGNC Symbol;Acc:11281]	protein_coding	16.3586	15.2917	16.6545	13.2464	13.186	13.9998	16.1016	13.4774	-0.256663	0.0253061	0.00259919
ENSG00000174775	HRAS	v-Ha-ras Harvey rat sarcoma viral oncogene homolog [Source:HGNC Symbol;Acc:5173]	protein_coding	16.966	17.0332	18.1532	19.5053	19.7661	20.0434	17.3841	19.7716	0.18566	0.0270112	0.000931684
ENSG00000169933	FRMPD4	FERM and PDZ domain containing 4 [Source:HGNC Symbol;Acc:29007]	protein_coding	1.1015	1.06834	0.977397	1.23315	1.35027	1.29739	1.04908	1.2936	0.302272	0.0273399	0.000649101
ENSG00000175137	SH3BP5L	SH3-binding domain protein 5-like [Source:HGNC Symbol;Acc:29360]	protein_coding	5.35928	4.98237	5.28542	5.82805	5.7718	6.1132	5.20902	5.90435	0.180767	0.0267684	0.00122948
ENSG00000204387	C6orf48	chromosome 6 open reading frame 48 [Source:HGNC Symbol;Acc:19078]	protein_coding	48.5312	48.1712	50.2274	40.8231	39.2313	44.0362	48.9766	41.3635	-0.243733	0.0241168	0.00396524
ENSG00000207808	MIR27A	microRNA 27a [Source:HGNC Symbol;Acc:31613]	miRNA	9.37836	8.71088	7.86564	3.18279	2.14532	0.704237	8.65163	2.01079	-2.10521	0.0281461	1.04545e-06
ENSG00000166592	RRAD	Ras-related associated with diabetes [Source:HGNC Symbol;Acc:10446]	protein_coding	5.50863	4.71899	5.24814	4.09163	3.59019	3.7606	5.15859	3.81414	-0.435619	0.0272699	0.000902772
ENSG00000019144	PHLDB1	pleckstrin homology-like domain, family B, member 1 [Source:HGNC Symbol;Acc:23697]	protein_coding	7.56007	7.38028	6.7136	8.28748	7.62377	8.15162	7.21798	8.02096	0.152178	0.015834	0.0123835
ENSG00000177363	LRRN4CL	LRRN4 C-terminal like [Source:HGNC Symbol;Acc:33724]	protein_coding	12.156	10.9708	11.9008	9.45173	9.27842	10.0086	11.6759	9.57959	-0.285496	0.0263254	0.00199027
ENSG00000172638	EFEMP2	EGF containing fibulin-like extracellular matrix protein 2 [Source:HGNC Symbol;Acc:3219]	protein_coding	58.7185	55.3604	56.3897	63.0497	61.2147	61.3273	56.8229	61.8639	0.122626	0.0219972	0.00632303
ENSG00000105339	DENND3	DENN/MADD domain containing 3 [Source:HGNC Symbol;Acc:29134]	protein_coding	9.30081	8.84022	8.56741	9.76025	9.52454	10.0725	8.90282	9.78575	0.13642	0.0221223	0.00627111
ENSG00000181027	FKRP	fukutin related protein [Source:HGNC Symbol;Acc:17997]	protein_coding	8.45017	7.35555	8.11534	9.03395	8.88698	9.40807	7.97369	9.10966	0.192151	0.0257641	0.00266851
ENSG00000197647	ZNF433	zinc finger protein 433 [Source:HGNC Symbol;Acc:20811]	protein_coding	1.18791	1.13214	1.50868	0.786137	0.815209	0.945539	1.27624	0.848962	-0.588131	0.0271794	0.00126521
ENSG00000112320	SOBP	sine oculis binding protein homolog (Drosophila) [Source:HGNC Symbol;Acc:29256]	protein_coding	2.15925	1.84185	1.84176	1.3902	1.4587	1.63155	1.94762	1.49348	-0.383032	0.0248116	0.00365581
ENSG00000139620	KANSL2	KAT8 regulatory NSL complex subunit 2 [Source:HGNC Symbol;Acc:26024]	protein_coding	4.84681	4.78104	5.0389	5.30951	6.0045	6.21334	4.88892	5.84245	0.257059	0.0278708	0.000677693
ENSG00000063978	RNF4	ring finger protein 4 [Source:HGNC Symbol;Acc:10067]	protein_coding	8.89925	8.90701	9.55916	10.148	10.083	10.1825	9.12181	10.1378	0.152359	0.0262106	0.00237146
ENSG00000176222	ZNF404	zinc finger protein 404 [Source:HGNC Symbol;Acc:19417]	protein_coding	3.24786	3.40182	3.72927	2.41605	2.45413	2.61076	3.45965	2.49365	-0.472367	0.0281637	0.000591821
ENSG00000213551	DNAJC9	DnaJ (Hsp40) homolog, subfamily C, member 9 [Source:HGNC Symbol;Acc:19123]	protein_coding	2.11575	2.03796	2.17742	2.54859	2.77432	2.68139	2.11038	2.6681	0.338312	0.0285508	0.00026786
ENSG00000125977	EIF2S2	eukaryotic translation initiation factor 2, subunit 2 beta, 38kDa [Source:HGNC Symbol;Acc:3266]	protein_coding	44.7855	45.5131	48.0687	37.4272	39.8072	41.2702	46.1224	39.5016	-0.223559	0.0195357	0.00946317
ENSG00000167601	AXL	AXL receptor tyrosine kinase [Source:HGNC Symbol;Acc:905]	protein_coding	138.105	133.054	133.905	155.222	139.682	151.204	135.022	148.703	0.13924	0.0223801	0.00663363
ENSG00000167766	ZNF83	zinc finger protein 83 [Source:HGNC Symbol;Acc:13158]	protein_coding	12.9109	11.8418	13.2434	10.441	10.5825	10.7524	12.6654	10.592	-0.25792	0.0259444	0.00317553
ENSG00000196365	LONP1	lon peptidase 1, mitochondrial [Source:HGNC Symbol;Acc:9479]	protein_coding	33.8396	32.6499	32.9971	28.9634	25.9299	28.4177	33.1622	27.7703	-0.255995	0.0265158	0.00267893
ENSG00000083750	RRAGB	Ras-related GTP binding B [Source:HGNC Symbol;Acc:19901]	protein_coding	7.24801	6.54786	7.11887	5.72436	5.45503	5.48297	6.97158	5.55412	-0.327928	0.0283502	0.000942673
ENSG00000261559	RP11-1H8.3		pseudogene	6.27078	6.54256	5.64184	7.36169	7.15591	9.23544	6.15172	7.91768	0.364087	0.027366	0.00197271
ENSG00000064932	SBNO2	strawberry notch homolog 2 (Drosophila) [Source:HGNC Symbol;Acc:29158]	protein_coding	15.091	13.0626	12.9023	16.0781	14.605	16.3138	13.6853	15.6656	0.194977	0.0243211	0.00506217
ENSG00000169230	PRELID1	PRELI domain containing 1 [Source:HGNC Symbol;Acc:30255]	protein_coding	11.5176	11.5171	11.5926	12.6777	13.0447	16.6989	11.5425	14.1404	0.292876	0.0264858	0.00297074
ENSG00000138772	ANXA3	annexin A3 [Source:HGNC Symbol;Acc:541]	protein_coding	3.49449	3.63851	3.96962	2.92021	2.91705	3.06601	3.70087	2.96776	-0.318493	0.027742	0.00185892
ENSG00000180229	HERC2P3	hect domain and RLD 2 pseudogene 3 [Source:HGNC Symbol;Acc:4871]	pseudogene	1.59227	1.86393	1.51369	2.07145	2.28716	1.9512	1.65663	2.10327	0.344382	0.0283397	0.00133057
ENSG00000197093	GAL3ST4	galactose-3-O-sulfotransferase 4 [Source:HGNC Symbol;Acc:24145]	protein_coding	5.76738	5.59171	5.7536	4.52497	4.53189	4.67321	5.70423	4.57669	-0.317728	0.0292486	0.000452602
ENSG00000183688	FAM101B	family with sequence similarity 101, member B [Source:HGNC Symbol;Acc:28705]	protein_coding	11.3834	10.9974	12.0459	12.2438	13.0319	13.6757	11.4756	12.9838	0.178148	0.0273228	0.00242038
ENSG00000260552	RP11-49I11.1		antisense	4.38688	3.97764	4.12563	2.71766	2.38134	2.34514	4.16338	2.48138	-0.746613	0.0295642	0.000181413
ENSG00000178999	AURKB	aurora kinase B [Source:HGNC Symbol;Acc:11390]	protein_coding	11.3413	11.6562	12.1617	13.5034	13.469	14.5842	11.7197	13.8522	0.241179	0.0291994	0.000571352
ENSG00000156976	EIF4A2	eukaryotic translation initiation factor 4A2 [Source:HGNC Symbol;Acc:3284]	protein_coding	61.748	63.7259	68.8199	56.9608	54.9326	53.9632	64.7646	55.2855	-0.228304	0.0190412	0.0107589
ENSG00000161888	SPC24	SPC24, NDC80 kinetochore complex component, homolog (S. cerevisiae) [Source:HGNC Symbol;Acc:26913]	protein_coding	3.4524	3.34858	3.92904	4.86897	4.79555	4.85457	3.57667	4.8397	0.436298	0.0296019	0.000319652
ENSG00000134363	FST	follistatin [Source:HGNC Symbol;Acc:3971]	protein_coding	118.403	114.513	128.039	128.226	132.974	134.375	120.319	131.858	0.13213	0.0233693	0.00662727
ENSG00000136144	RCBTB1	regulator of chromosome condensation (RCC1) and BTB (POZ) domain containing protein 1 [Source:HGNC Symbol;Acc:18243]	protein_coding	10.4509	10.0817	10.6273	8.94075	8.44072	8.70823	10.3866	8.69657	-0.256209	0.0278292	0.00218871
ENSG00000153179	RASSF3	Ras association (RalGDS/AF-6) domain family member 3 [Source:HGNC Symbol;Acc:14271]	protein_coding	19.4718	18.7594	20.8165	16.8601	16.2369	16.7855	19.6826	16.6275	-0.243347	0.0255071	0.00462511
ENSG00000168610	STAT3	signal transducer and activator of transcription 3 (acute-phase response factor) [Source:HGNC Symbol;Acc:11364]	protein_coding	22.4378	22.3584	21.5567	24.0337	23.8767	24.9383	22.1177	24.2829	0.134741	0.026444	0.00370776
ENSG00000205476	CCDC85C	coiled-coil domain containing 85C [Source:HGNC Symbol;Acc:35459]	protein_coding	4.0837	4.07161	3.70069	4.69816	4.49699	4.35956	3.952	4.51824	0.193177	0.0247672	0.00538561
ENSG00000117533	VAMP4	vesicle-associated membrane protein 4 [Source:HGNC Symbol;Acc:12645]	protein_coding	8.58775	8.7553	8.89086	7.20617	7.54128	7.20836	8.74463	7.3186	-0.25683	0.0280436	0.00232216
ENSG00000140859	KIFC3	kinesin family member C3 [Source:HGNC Symbol;Acc:6326]	protein_coding	9.00807	8.45311	8.37808	9.91955	9.0117	9.60425	8.61308	9.51183	0.143193	0.0204614	0.00994077
ENSG00000115363	FAM176A	family with sequence similarity 176, member A [Source:HGNC Symbol;Acc:25816]	protein_coding	10.6982	9.06477	10.5618	11.3016	11.7797	11.991	10.1083	11.6908	0.209837	0.0281282	0.00229166
ENSG00000260924	AC004463.6		antisense	0.309644	0.12326	0.243799	0.460376	0.504256	0.725785	0.225568	0.563472	1.32078	0.0301724	0.00026786
ENSG00000185883	ATP6V0C	ATPase, H+ transporting, lysosomal 16kDa, V0 subunit c [Source:HGNC Symbol;Acc:855]	protein_coding	0.533846	0.419566	0.565821	0.227049	0.162042	0.177309	0.506411	0.1888	-1.42345	0.0303414	0.000142968
ENSG00000091844	RGS17	regulator of G-protein signaling 17 [Source:HGNC Symbol;Acc:14088]	protein_coding	6.97919	6.8436	6.4645	5.23527	5.28463	5.00284	6.76243	5.17425	-0.386193	0.0299884	0.000623559
ENSG00000197771	MCMBP	minichromosome maintenance complex binding protein [Source:HGNC Symbol;Acc:25782]	protein_coding	8.73778	8.39421	9.59424	9.88466	9.98925	10.11	8.90874	9.99464	0.165933	0.0271794	0.00349896
ENSG00000196569	LAMA2	laminin, alpha 2 [Source:HGNC Symbol;Acc:6482]	protein_coding	2.86618	3.24372	2.60969	2.24297	2.39468	2.08659	2.90653	2.24141	-0.374889	0.0281845	0.00259999
ENSG00000150753	CCT5	chaperonin containing TCP1, subunit 5 (epsilon) [Source:HGNC Symbol;Acc:1618]	protein_coding	39.9481	41.1928	43.38	43.9167	46.326	46.3226	41.507	45.5218	0.133202	0.0255488	0.0053028
ENSG00000198839	ZNF277	zinc finger protein 277 [Source:HGNC Symbol;Acc:13070]	protein_coding	4.59562	4.43045	4.72364	3.68511	3.68243	3.61961	4.58324	3.66238	-0.323584	0.0303165	0.000551465
ENSG00000169607	CKAP2L	cytoskeleton associated protein 2-like [Source:HGNC Symbol;Acc:26877]	protein_coding	3.16712	2.88234	3.11743	3.40204	3.7403	3.63326	3.05563	3.59187	0.233264	0.0299969	0.000881484
ENSG00000183155	RABIF	RAB interacting factor [Source:HGNC Symbol;Acc:9797]	protein_coding	4.58095	4.59531	4.92932	5.47428	6.08283	5.45914	4.70186	5.67208	0.270647	0.029937	0.000997531
ENSG00000174353	STAG3L3	stromal antigen 3-like 3 [Source:HGNC Symbol;Acc:33845]	protein_coding	3.51739	3.45351	3.31117	4.30341	4.00276	3.88915	3.42735	4.06511	0.246198	0.0290405	0.00199215
ENSG00000186575	NF2	neurofibromin 2 (merlin) [Source:HGNC Symbol;Acc:7773]	protein_coding	13.8978	13.7608	13.1876	15.9085	14.2521	15.2314	13.6154	15.1306	0.152234	0.0239435	0.0071157
ENSG00000196470	SIAH1	siah E3 ubiquitin protein ligase 1 [Source:HGNC Symbol;Acc:10857]	protein_coding	1.36564	1.20804	1.52555	1.04124	0.98257	1.02379	1.36641	1.01587	-0.427679	0.0292779	0.00187439
ENSG00000153823	PID1	phosphotyrosine interaction domain containing 1 [Source:HGNC Symbol;Acc:26084]	protein_coding	2.1178	2.10758	2.11906	1.30992	1.57519	1.69821	2.11481	1.52777	-0.4691	0.0304155	0.000765168
ENSG00000234745	HLA-B	major histocompatibility complex, class I, B [Source:HGNC Symbol;Acc:4932]	protein_coding	111.919	110.378	120.799	121.437	127.076	126.657	114.365	125.056	0.128932	0.0251143	0.00616146
ENSG00000133943	C14orf159	chromosome 14 open reading frame 159 [Source:HGNC Symbol;Acc:20498]	protein_coding	3.84535	3.67733	3.62003	3.16435	3.00081	2.86874	3.71424	3.0113	-0.302679	0.0292779	0.00203271
ENSG00000101181	GTPBP5	GTP binding protein 5 (putative) [Source:HGNC Symbol;Acc:16239]	protein_coding	3.75504	3.59554	3.59512	4.23375	4.0423	4.41848	3.64856	4.23151	0.213844	0.0304155	0.000969385
ENSG00000101751	POLI	polymerase (DNA directed) iota [Source:HGNC Symbol;Acc:9182]	protein_coding	8.95342	7.79936	8.28249	6.53137	7.20795	6.41037	8.34509	6.71656	-0.313204	0.0267439	0.00470857
ENSG00000156983	BRPF1	bromodomain and PHD finger containing, 1 [Source:HGNC Symbol;Acc:14255]	protein_coding	4.05328	4.1855	3.95795	4.87269	4.61341	4.50817	4.06558	4.66476	0.198341	0.0286888	0.00280916
ENSG00000165943	MOAP1	modulator of apoptosis 1 [Source:HGNC Symbol;Acc:16658]	protein_coding	10.2046	9.62973	10.4677	8.15458	7.87098	8.704	10.1007	8.24319	-0.293181	0.0297416	0.00175759
ENSG00000100764	PSMC1	proteasome (prosome, macropain) 26S subunit, ATPase, 1 [Source:HGNC Symbol;Acc:9547]	protein_coding	15.5423	16.6544	17.4107	17.5997	19.5042	18.8721	16.5358	18.6587	0.174253	0.0269897	0.00461062
ENSG00000198887	SMC5	structural maintenance of chromosomes 5 [Source:HGNC Symbol;Acc:20465]	protein_coding	10.6276	9.47814	9.86947	11.1619	11.4431	10.698	9.99172	11.101	0.151886	0.0232516	0.00835369
ENSG00000072682	P4HA2	prolyl 4-hydroxylase, alpha polypeptide II [Source:HGNC Symbol;Acc:8547]	protein_coding	16.7627	17.687	17.8294	19.1291	19.1631	19.0676	17.4264	19.1199	0.133807	0.0269853	0.00462511
ENSG00000122585	NPY	neuropeptide Y [Source:HGNC Symbol;Acc:7955]	protein_coding	0.172665	0.160376	0.348933	0.786195	0.363377	0.954275	0.227325	0.701283	1.62524	0.0305905	0.00105477
ENSG00000146918	NCAPG2	non-SMC condensin II complex, subunit G2 [Source:HGNC Symbol;Acc:21904]	protein_coding	6.6984	6.32725	6.21983	6.96902	7.56446	7.09996	6.41516	7.21115	0.168744	0.0280436	0.0037642
ENSG00000025772	TOMM34	translocase of outer mitochondrial membrane 34 [Source:HGNC Symbol;Acc:15746]	protein_coding	19.2032	18.6531	19.4107	21.25	21.6811	21.498	19.089	21.4764	0.170007	0.0308859	0.000988883
ENSG00000163071	SPATA18	spermatogenesis associated 18 [Source:HGNC Symbol;Acc:29579]	protein_coding	4.95	4.99828	4.80712	3.97769	4.02449	4.01334	4.91847	4.00517	-0.296344	0.0310352	0.000857119
ENSG00000185298	CCDC137	coiled-coil domain containing 137 [Source:HGNC Symbol;Acc:33451]	protein_coding	14.0852	13.3209	12.7583	15.2832	14.7975	15.6014	13.3881	15.2274	0.185712	0.0291994	0.00274226
ENSG00000254851	RP11-109L13.1		pseudogene	28.9417	28.0678	28.5399	22.6764	23.0714	23.8901	28.5165	23.2126	-0.296885	0.0312639	0.000699704
ENSG00000174579	MSL2	male-specific lethal 2 homolog (Drosophila) [Source:HGNC Symbol;Acc:25544]	protein_coding	3.62057	3.14836	3.37738	3.84934	3.90832	4.09687	3.38211	3.95151	0.224482	0.0306034	0.0013664
ENSG00000143786	CNIH3	cornichon homolog 3 (Drosophila) [Source:HGNC Symbol;Acc:26802]	protein_coding	2.40554	2.3361	2.51619	1.83362	2.0395	1.88807	2.41927	1.9204	-0.333169	0.030517	0.00148438
ENSG00000253626	EIF5AL1	eukaryotic translation initiation factor 5A-like 1 [Source:HGNC Symbol;Acc:17419]	protein_coding	11.4205	11.3092	12.2137	12.59	12.8529	14.22	11.6478	13.221	0.182767	0.0295642	0.00249106
ENSG00000137076	TLN1	talin 1 [Source:HGNC Symbol;Acc:11845]	protein_coding	109.944	113.932	95.467	123.068	119.447	115.829	106.448	119.448	0.166234	0.0112495	0.0209163
ENSG00000172137	CALB2	calbindin 2 [Source:HGNC Symbol;Acc:1435]	protein_coding	1.38497	1.24046	1.45395	0.740012	0.592772	0.968188	1.35979	0.766991	-0.826104	0.0321193	5.66395e-05
ENSG00000062822	POLD1	polymerase (DNA directed), delta 1, catalytic subunit [Source:HGNC Symbol;Acc:9175]	protein_coding	6.55647	5.68727	6.24286	7.11999	6.77621	7.41378	6.1622	7.10333	0.20505	0.0292779	0.00306616
ENSG00000204574	ABCF1	ATP-binding cassette, sub-family F (GCN20), member 1 [Source:HGNC Symbol;Acc:70]	protein_coding	22.0518	23.2581	22.7624	25.0701	25.1823	24.6719	22.6908	24.9748	0.138366	0.0281461	0.00424147
ENSG00000095383	TBC1D2	TBC1 domain family, member 2 [Source:HGNC Symbol;Acc:18026]	protein_coding	16.3351	16.6641	16.2179	20.1775	17.9696	17.8197	16.4057	18.6556	0.185408	0.0286985	0.00369288
ENSG00000185745	IFIT1	interferon-induced protein with tetratricopeptide repeats 1 [Source:HGNC Symbol;Acc:5407]	protein_coding	3.36745	3.19495	3.78593	2.59358	2.57244	2.76526	3.44944	2.64376	-0.383773	0.0307085	0.00174407
ENSG00000223361	FTH1P10	ferritin, heavy polypeptide 1 pseudogene 10 [Source:HGNC Symbol;Acc:3980]	pseudogene	67.953	65.7531	71.5616	56.3919	52.6896	60.9256	68.4226	56.669	-0.271912	0.0292486	0.00323298
ENSG00000169679	BUB1	budding uninhibited by benzimidazoles 1 homolog (yeast) [Source:HGNC Symbol;Acc:1148]	protein_coding	4.90601	4.82087	4.81602	5.26963	5.85756	5.48214	4.84763	5.53644	0.191679	0.0307274	0.00188186
ENSG00000157193	LRP8	low density lipoprotein receptor-related protein 8, apolipoprotein e receptor [Source:HGNC Symbol;Acc:6700]	protein_coding	3.45148	3.50221	3.1044	4.00199	3.86201	3.67911	3.3527	3.8477	0.198675	0.0255605	0.00705466
ENSG00000179218	CALR	calreticulin [Source:HGNC Symbol;Acc:1455]	protein_coding	1382.17	1460.38	1483.54	1245.37	1210.18	1289.34	1442.03	1248.3	-0.20814	0.0194336	0.0132277
ENSG00000205542	TMSB4X	thymosin beta 4, X-linked [Source:HGNC Symbol;Acc:11881]	protein_coding	719.63	798.792	844.466	648.868	669.864	688.934	787.629	669.222	-0.235031	0.0155404	0.0171618
ENSG00000106415	GLCCI1	glucocorticoid induced transcript 1 [Source:HGNC Symbol;Acc:18713]	protein_coding	2.50836	2.05094	2.48658	1.872	1.84308	1.7632	2.34863	1.82609	-0.363057	0.0299001	0.00285861
ENSG00000147650	LRP12	low density lipoprotein receptor-related protein 12 [Source:HGNC Symbol;Acc:31708]	protein_coding	5.02867	4.99404	4.83136	5.54125	5.7929	5.29474	4.95136	5.54296	0.162834	0.027878	0.00488959
ENSG00000212452	SNORD69	small nucleolar RNA, C/D box 69 [Source:HGNC Symbol;Acc:32730]	snoRNA	12.8046	6.52209	6.45012	3.76148	1.81099	2.49684	8.59226	2.68977	-1.67555	0.0320388	0.000829955
ENSG00000115839	RAB3GAP1	RAB3 GTPase activating protein subunit 1 (catalytic) [Source:HGNC Symbol;Acc:17063]	protein_coding	15.9612	16.1936	16.1032	17.4242	18.1762	17.6095	16.086	17.7366	0.140925	0.0304019	0.00249642
ENSG00000131845	ZNF304	zinc finger protein 304 [Source:HGNC Symbol;Acc:13505]	protein_coding	1.88401	1.95732	2.18569	2.34206	2.56375	2.50067	2.00901	2.46883	0.297343	0.0321193	0.000855807
ENSG00000198363	ASPH	aspartate beta-hydroxylase [Source:HGNC Symbol;Acc:757]	protein_coding	78.4707	80.8089	78.2308	85.5445	89.9102	83.852	79.1701	86.4356	0.126669	0.0247354	0.00829422
ENSG00000117155	SSX2IP	synovial sarcoma, X breakpoint 2 interacting protein [Source:HGNC Symbol;Acc:16509]	protein_coding	3.71385	3.8543	4.11642	3.08805	3.3513	3.24374	3.89485	3.2277	-0.271064	0.0281461	0.00490136
ENSG00000189043	NDUFA4	NADH dehydrogenase (ubiquinone) 1 alpha subcomplex, 4, 9kDa [Source:HGNC Symbol;Acc:7687]	protein_coding	30.9373	28.86	33.0849	33.8248	34.7596	34.3006	30.9607	34.295	0.147559	0.0279853	0.00510273
ENSG00000248290	TNXA	tenascin XA (pseudogene) [Source:HGNC Symbol;Acc:11975]	pseudogene	0.218483	0.173943	0.200693	0.0507561	0.0273692	0.0539062	0.197706	0.0440105	-2.16744	0.0330579	0.000118073
ENSG00000238227	C9orf69	chromosome 9 open reading frame 69 [Source:HGNC Symbol;Acc:31009]	protein_coding	6.88578	6.32656	6.93199	7.77773	7.17221	8.18011	6.71478	7.71002	0.199394	0.0295642	0.00368584
ENSG00000196363	WDR5	WD repeat domain 5 [Source:HGNC Symbol;Acc:12757]	protein_coding	12.8639	12.7282	12.9917	14.1475	14.2163	15.0101	12.8612	14.458	0.168834	0.0320388	0.00129303
ENSG00000157107	FCHO2	FCH domain only 2 [Source:HGNC Symbol;Acc:25180]	protein_coding	4.64932	4.22224	4.87475	3.76516	3.92256	3.48736	4.5821	3.72503	-0.29876	0.0280684	0.00526539
ENSG00000161981	SNRNP25	small nuclear ribonucleoprotein 25kDa (U11/U12) [Source:HGNC Symbol;Acc:14161]	protein_coding	6.89106	7.04742	7.26562	7.80201	8.09334	8.64347	7.06803	8.17961	0.210723	0.0326407	0.000988883
ENSG00000163808	KIF15	kinesin family member 15 [Source:HGNC Symbol;Acc:17273]	protein_coding	2.18992	2.13994	2.0061	2.40016	2.71474	2.5284	2.11199	2.54776	0.270629	0.0324452	0.00127138
ENSG00000021762	OSBPL5	oxysterol binding protein-like 5 [Source:HGNC Symbol;Acc:16392]	protein_coding	7.79147	7.24485	7.33316	8.35452	7.85948	8.67071	7.45649	8.2949	0.153728	0.0273465	0.00641826
ENSG00000052841	TTC17	tetratricopeptide repeat domain 17 [Source:HGNC Symbol;Acc:25596]	protein_coding	10.7161	10.8469	10.985	9.30958	9.50729	9.03146	10.8494	9.28278	-0.224981	0.028713	0.00510273
ENSG00000186076	RP11-887P2.3		pseudogene	21.6606	25.5638	21.73	25.6371	29.0194	29.1167	22.9848	27.9244	0.280846	0.0320388	0.00182743
ENSG00000168785	TSPAN5	tetraspanin 5 [Source:HGNC Symbol;Acc:17753]	protein_coding	15.5471	15.0609	15.6929	12.8695	13.4604	13.3888	15.4336	13.2396	-0.221219	0.0299292	0.00400148
ENSG00000105443	CYTH2	cytohesin 2 [Source:HGNC Symbol;Acc:9502]	protein_coding	8.04403	7.66414	8.31078	6.73143	6.52576	7.11976	8.00632	6.79232	-0.237235	0.0280665	0.00588024
ENSG00000156026	MCU	mitochondrial calcium uniporter [Source:HGNC Symbol;Acc:23526]	protein_coding	8.96666	8.75017	8.84723	9.5135	10.7348	10.1236	8.85469	10.124	0.19326	0.0326055	0.00146971
ENSG00000110328	GALNTL4	UDP-N-acetyl-alpha-D-galactosamine:polypeptide N-acetylgalactosaminyltransferase-like 4 [Source:HGNC Symbol;Acc:30488]	protein_coding	1.92039	1.87331	2.07817	2.40136	2.39138	2.55191	1.95729	2.44822	0.322873	0.0337012	0.000419095
ENSG00000123095	BHLHE41	basic helix-loop-helix family, member e41 [Source:HGNC Symbol;Acc:16617]	protein_coding	0.757259	0.823084	0.740001	0.466375	0.543938	0.347837	0.773448	0.452717	-0.772696	0.0340463	7.54556e-05
ENSG00000170515	PA2G4	proliferation-associated 2G4, 38kDa [Source:HGNC Symbol;Acc:8550]	protein_coding	14.4226	15.3686	16.0054	16.0817	17.8303	17.8481	15.2655	17.2534	0.176602	0.0303193	0.00381228
ENSG00000122870	BICC1	bicaudal C homolog 1 (Drosophila) [Source:HGNC Symbol;Acc:19351]	protein_coding	8.58204	8.29062	8.1235	9.2777	9.36435	9.15089	8.33205	9.26432	0.153012	0.0310352	0.00311348
ENSG00000173486	FKBP2	FK506 binding protein 2, 13kDa [Source:HGNC Symbol;Acc:3718]	protein_coding	30.4599	29.0452	30.0147	26.1561	23.5879	24.8349	29.8399	24.8596	-0.26344	0.0306034	0.00372732
ENSG00000173575	CHD2	chromodomain helicase DNA binding protein 2 [Source:HGNC Symbol;Acc:1917]	protein_coding	9.53389	9.68394	8.98532	8.06111	8.2612	7.85874	9.40105	8.06035	-0.221979	0.0218455	0.0125565
ENSG00000128268	MGAT3	mannosyl (beta-1,4-)-glycoprotein beta-1,4-N-acetylglucosaminyltransferase [Source:HGNC Symbol;Acc:7046]	protein_coding	0.932523	0.958182	0.931547	1.27003	1.19591	1.16263	0.940751	1.20952	0.362552	0.0340008	0.000615192
ENSG00000137871	ZNF280D	zinc finger protein 280D [Source:HGNC Symbol;Acc:25953]	protein_coding	2.70108	2.54508	2.78893	2.19585	2.22969	2.26317	2.67836	2.22957	-0.264587	0.0322902	0.00237753
ENSG00000177225	PDDC1	Parkinson disease 7 domain containing 1 [Source:HGNC Symbol;Acc:26616]	protein_coding	10.9932	10.4408	11.2248	13.5149	11.5738	12.1587	10.8863	12.4158	0.189667	0.0305772	0.00409796
ENSG00000167522	ANKRD11	ankyrin repeat domain 11 [Source:HGNC Symbol;Acc:21316]	protein_coding	15.8743	15.6475	13.6904	12.5758	12.6049	12.9287	15.0707	12.7031	-0.246564	0.0208525	0.0138256
ENSG00000011258	MBTD1	mbt domain containing 1 [Source:HGNC Symbol;Acc:19866]	protein_coding	2.14795	2.28704	2.2793	1.75964	1.87097	1.67802	2.23809	1.76954	-0.338892	0.0328244	0.0019211
ENSG00000198805	PNP	purine nucleoside phosphorylase [Source:HGNC Symbol;Acc:7892]	protein_coding	5.30978	5.34583	6.14798	4.37356	4.64932	4.60519	5.60119	4.54269	-0.302188	0.0304852	0.00427192
ENSG00000105227	PRX	periaxin [Source:HGNC Symbol;Acc:13797]	protein_coding	1.12042	1.18015	1.25731	0.946689	0.744455	0.827897	1.18596	0.83968	-0.498142	0.0340008	0.000969385
ENSG00000213516	RBMXL1	RNA binding motif protein, X-linked-like 1 [Source:HGNC Symbol;Acc:25073]	protein_coding	5.02676	4.9129	5.22624	4.17261	3.83771	4.36787	5.0553	4.12606	-0.293029	0.0324604	0.00264324
ENSG00000144711	IQSEC1	IQ motif and Sec7 domain 1 [Source:HGNC Symbol;Acc:29112]	protein_coding	6.67803	6.35735	5.6501	6.97082	7.33286	7.04342	6.22849	7.1157	0.192122	0.0301823	0.00494247
ENSG00000029993	HMGB3	high mobility group box 3 [Source:HGNC Symbol;Acc:5004]	protein_coding	6.06914	6.2925	6.32616	6.69093	7.31151	7.85809	6.22927	7.28684	0.226231	0.0340463	0.00118652
ENSG00000100814	CCNB1IP1	cyclin B1 interacting protein 1, E3 ubiquitin protein ligase [Source:HGNC Symbol;Acc:19437]	protein_coding	7.5018	6.24541	7.68488	5.45875	5.69152	6.07519	7.14403	5.74182	-0.315229	0.0287226	0.00678679
ENSG00000105519	CAPS	calcyphosine [Source:HGNC Symbol;Acc:1487]	protein_coding	1.89546	1.55974	1.93974	1.29858	1.06804	1.43768	1.79831	1.2681	-0.503976	0.0339563	0.00159695
ENSG00000244586	WNT5A-AS1	WNT5A antisense RNA 1 [Source:HGNC Symbol;Acc:40616]	antisense	6.61541	7.0899	5.20031	8.68903	8.81299	8.95366	6.30188	8.81856	0.484762	0.0351859	0.000458884
ENSG00000188921	PTPLAD2	protein tyrosine phosphatase-like A domain containing 2 [Source:HGNC Symbol;Acc:20920]	protein_coding	2.77492	3.25569	3.19397	2.4152	2.40373	2.48361	3.07486	2.43418	-0.337084	0.032918	0.00279414
ENSG00000138071	ACTR2	ARP2 actin-related protein 2 homolog (yeast) [Source:HGNC Symbol;Acc:169]	protein_coding	99.7239	101.758	101.104	107.926	112.153	108.875	100.862	109.651	0.120538	0.0306034	0.0051759
ENSG00000068793	CYFIP1	cytoplasmic FMR1 interacting protein 1 [Source:HGNC Symbol;Acc:13759]	protein_coding	17.1962	16.8544	16.5607	18.3599	18.2704	18.5662	16.8704	18.3989	0.125118	0.0315196	0.00429567
ENSG00000108774	RAB5C	RAB5C, member RAS oncogene family [Source:HGNC Symbol;Acc:9785]	protein_coding	62.9583	62.3781	63.9444	69.1548	68.3765	68.8439	63.0936	68.7917	0.124742	0.0324452	0.00344851
ENSG00000095002	MSH2	mutS homolog 2, colon cancer, nonpolyposis type 1 (E. coli) [Source:HGNC Symbol;Acc:7325]	protein_coding	8.74824	8.48532	8.96976	6.98602	7.42257	7.54861	8.73444	7.31907	-0.255055	0.0325886	0.00330841
ENSG00000112182	BACH2	BTB and CNC homology 1, basic leucine zipper transcription factor 2 [Source:HGNC Symbol;Acc:14078]	protein_coding	0.389925	0.386318	0.307435	0.247294	0.233645	0.224481	0.361226	0.23514	-0.619381	0.0351024	0.000806338
ENSG00000132356	PRKAA1	protein kinase, AMP-activated, alpha 1 catalytic subunit [Source:HGNC Symbol;Acc:9376]	protein_coding	16.6463	16.2223	15.38	17.8102	17.5503	17.5931	16.0828	17.6512	0.134244	0.0285508	0.00746498
ENSG00000089280	FUS	fused in sarcoma [Source:HGNC Symbol;Acc:4010]	protein_coding	52.904	52.5841	54.6027	57.5651	56.6852	59.6727	53.3636	57.9743	0.119557	0.0311741	0.00486977
ENSG00000168300	PCMTD1	protein-L-isoaspartate (D-aspartate) O-methyltransferase domain containing 1 [Source:HGNC Symbol;Acc:30483]	protein_coding	3.22097	3.2909	3.2106	2.71237	2.71373	2.46574	3.24082	2.63061	-0.30096	0.0335839	0.00259924
ENSG00000157150	TIMP4	TIMP metallopeptidase inhibitor 4 [Source:HGNC Symbol;Acc:11823]	protein_coding	2.12032	1.79038	2.23098	1.19114	1.41981	1.43152	2.04723	1.34749	-0.603397	0.0353865	0.000942986
ENSG00000123064	DDX54	DEAD (Asp-Glu-Ala-Asp) box polypeptide 54 [Source:HGNC Symbol;Acc:20084]	protein_coding	9.20105	8.59286	8.7288	10.103	9.51119	9.94693	8.84091	9.85372	0.156474	0.0317549	0.00461397
ENSG00000173950	XXYLT1	xyloside xylosyltransferase 1 [Source:HGNC Symbol;Acc:26639]	protein_coding	3.81023	3.82851	3.47839	4.11163	4.40844	4.36174	3.70571	4.29394	0.21255	0.0341975	0.00217694
ENSG00000142864	SERBP1	SERPINE1 mRNA binding protein 1 [Source:HGNC Symbol;Acc:17860]	protein_coding	31.9375	31.7157	33.1507	34.5495	35.4792	35.4658	32.2679	35.1648	0.124031	0.032952	0.00345508
ENSG00000185532	PRKG1	protein kinase, cGMP-dependent, type I [Source:HGNC Symbol;Acc:9414]	protein_coding	6.45647	6.74127	6.20156	5.20715	5.66886	4.82614	6.46643	5.23405	-0.305042	0.0336074	0.00289198
ENSG00000187626	ZKSCAN4	zinc finger with KRAB and SCAN domains 4 [Source:HGNC Symbol;Acc:13854]	protein_coding	1.23803	1.40289	1.31918	1.99715	1.62841	1.71056	1.32003	1.77871	0.430255	0.0348824	0.00190799
ENSG00000162236	STX5	syntaxin 5 [Source:HGNC Symbol;Acc:11440]	protein_coding	19.6297	20.4184	19.8565	16.3342	16.4963	17.4989	19.9682	16.7765	-0.251266	0.0330579	0.0037685
ENSG00000082146	STRADB	STE20-related kinase adaptor beta [Source:HGNC Symbol;Acc:13205]	protein_coding	10.6928	9.71406	10.7102	8.11774	8.65704	9.09886	10.3723	8.62455	-0.266219	0.0304852	0.00647286
ENSG00000107551	RASSF4	Ras association (RalGDS/AF-6) domain family member 4 [Source:HGNC Symbol;Acc:20793]	protein_coding	2.38335	2.13173	2.19987	1.71756	1.76684	1.91895	2.23832	1.80112	-0.31352	0.0340463	0.00294747
ENSG00000119326	CTNNAL1	catenin (cadherin-associated protein), alpha-like 1 [Source:HGNC Symbol;Acc:2512]	protein_coding	30.6766	29.4091	32.7913	32.7546	35.1089	34.7594	30.959	34.2076	0.14396	0.0314467	0.00570375
ENSG00000114491	UMPS	uridine monophosphate synthetase [Source:HGNC Symbol;Acc:12563]	protein_coding	5.5629	5.17542	5.81132	5.97763	6.59968	6.69558	5.51655	6.4243	0.219774	0.0351893	0.00197759
ENSG00000159167	STC1	stanniocalcin 1 [Source:HGNC Symbol;Acc:11373]	protein_coding	29.0376	28.1101	27.5957	24.4179	24.1115	20.0975	28.2478	22.8756	-0.304326	0.031553	0.00561677
ENSG00000178662	CSRNP3	cysteine-serine-rich nuclear protein 3 [Source:HGNC Symbol;Acc:30729]	protein_coding	0.0987179	0.105798	0.072079	0.0510412	0.0466115	0.0306019	0.0921984	0.0427516	-1.10876	0.036763	0.00046711
ENSG00000108518	PFN1	profilin 1 [Source:HGNC Symbol;Acc:8881]	protein_coding	523.733	510.347	560.521	575.246	560.074	636.444	531.534	590.588	0.151991	0.0312315	0.00605932
ENSG00000113583	C5orf15	chromosome 5 open reading frame 15 [Source:HGNC Symbol;Acc:20656]	protein_coding	28.9459	29.6881	30.2803	31.9492	34.1163	32.4827	29.6381	32.8494	0.148417	0.0339886	0.00338
ENSG00000142798	HSPG2	heparan sulfate proteoglycan 2 [Source:HGNC Symbol;Acc:5273]	protein_coding	23.3477	24.9065	17.3914	29.2667	28.1115	25.4085	21.8819	27.5956	0.3347	0.0317647	0.00568669
ENSG00000169432	SCN9A	sodium channel, voltage-gated, type IX, alpha subunit [Source:HGNC Symbol;Acc:10597]	protein_coding	12.7275	13.3374	12.5196	14.4646	14.9748	13.5366	12.8615	14.3253	0.155509	0.0306034	0.00697028
ENSG00000141560	FN3KRP	fructosamine 3 kinase related protein [Source:HGNC Symbol;Acc:25700]	protein_coding	12.8978	13.0236	13.4632	14.7349	14.6086	15.6241	13.1282	14.9892	0.191254	0.0365156	0.00116956
ENSG00000104756	KCTD9	potassium channel tetramerisation domain containing 9 [Source:HGNC Symbol;Acc:22401]	protein_coding	15.002	14.8246	15.1279	16.371	17.0837	16.3349	14.9848	16.5966	0.147382	0.0350057	0.00277036
ENSG00000143344	RGL1	ral guanine nucleotide dissociation stimulator-like 1 [Source:HGNC Symbol;Acc:30281]	protein_coding	6.03883	6.05514	5.6924	4.81962	4.78688	5.12381	5.92879	4.9101	-0.271984	0.0343783	0.00347684
ENSG00000138448	ITGAV	integrin, alpha V [Source:HGNC Symbol;Acc:6150]	protein_coding	25.9419	27.7968	25.2561	30.5927	31.1933	27.9434	26.3316	29.9098	0.183824	0.0341975	0.0037685
ENSG00000143850	PLEKHA6	pleckstrin homology domain containing, family A member 6 [Source:HGNC Symbol;Acc:17053]	protein_coding	3.56627	3.22912	3.03381	3.80426	3.90901	3.714	3.2764	3.80909	0.217335	0.0342382	0.00394676
ENSG00000182796	TMEM198B	transmembrane protein 198B, pseudogene [Source:HGNC Symbol;Acc:43629]	pseudogene	4.33703	4.08637	4.68067	3.19842	3.05185	3.7915	4.36802	3.34726	-0.384001	0.0364973	0.00174151
ENSG00000130518	KIAA1683	KIAA1683 [Source:HGNC Symbol;Acc:29350]	protein_coding	0.487631	0.400354	0.407933	0.243557	0.236705	0.330861	0.431973	0.270374	-0.675982	0.0379258	0.000609913
ENSG00000184661	CDCA2	cell division cycle associated 2 [Source:HGNC Symbol;Acc:14623]	protein_coding	3.42627	3.13706	3.50613	3.76919	4.08204	4.11838	3.35648	3.98987	0.249391	0.0375471	0.00102862
ENSG00000146242	TPBG	trophoblast glycoprotein [Source:HGNC Symbol;Acc:12004]	protein_coding	16.3539	15.1087	16.5499	12.8911	13.6861	14.4129	16.0042	13.6634	-0.228134	0.0278292	0.0107913
ENSG00000079308	TNS1	tensin 1 [Source:HGNC Symbol;Acc:11973]	protein_coding	6.569	7.09217	5.48898	8.5711	8.31758	7.29823	6.38338	8.0623	0.336871	0.0381914	0.000475472
ENSG00000244567	AC096772.6		lincRNA	2.5454	2.17697	2.45389	1.40981	1.67954	1.52343	2.39209	1.53759	-0.637596	0.038258	0.00055191
ENSG00000117569	PTBP2	polypyrimidine tract binding protein 2 [Source:HGNC Symbol;Acc:17662]	protein_coding	4.35272	4.08475	4.51533	3.52939	3.19824	3.64216	4.3176	3.4566	-0.320878	0.036181	0.00263927
ENSG00000141522	ARHGDIA	Rho GDP dissociation inhibitor (GDI) alpha [Source:HGNC Symbol;Acc:678]	protein_coding	199.96	190.774	198.982	215.208	204.304	219.797	196.572	213.103	0.116494	0.0292826	0.00960052
ENSG00000161547	SRSF2	serine/arginine-rich splicing factor 2 [Source:HGNC Symbol;Acc:10783]	protein_coding	55.7203	52.3536	58.4305	58.0303	61.754	66.1987	55.5015	61.9944	0.159611	0.0344358	0.00462242
ENSG00000167702	KIFC2	kinesin family member C2 [Source:HGNC Symbol;Acc:29530]	protein_coding	4.97063	4.09206	4.55934	3.74034	3.43049	3.65627	4.54068	3.60903	-0.331295	0.0350295	0.00412921
ENSG00000161692	DBF4B	DBF4 homolog B (S. cerevisiae) [Source:HGNC Symbol;Acc:17883]	protein_coding	1.53606	1.4941	1.44626	1.8873	1.74354	1.69125	1.49214	1.77403	0.249648	0.0365261	0.00270787
ENSG00000072506	HSD17B10	hydroxysteroid (17-beta) dehydrogenase 10 [Source:HGNC Symbol;Acc:4800]	protein_coding	31.7193	32.5881	31.8616	35.4018	34.8928	38.0572	32.0563	36.1173	0.172079	0.0365156	0.00280073
ENSG00000163565	IFI16	interferon, gamma-inducible protein 16 [Source:HGNC Symbol;Acc:5395]	protein_coding	25.3766	25.4957	25.8875	22.0207	22.716	21.1203	25.5866	21.9523	-0.221014	0.0308284	0.00850911
ENSG00000166750	SLFN5	schlafen family member 5 [Source:HGNC Symbol;Acc:28286]	protein_coding	23.7178	25.8749	19.7653	18.0043	18.4823	16.0516	23.1194	17.5127	-0.400699	0.0378772	0.00147472
ENSG00000080603	SRCAP	Snf2-related CREBBP activator protein [Source:HGNC Symbol;Acc:16974]	protein_coding	8.49476	8.61736	7.08394	9.53641	9.53909	8.81704	8.06535	9.29751	0.205107	0.028863	0.0105227
ENSG00000104164	BLOC1S6	biogenesis of lysosomal organelles complex-1, subunit 6, pallidin [Source:HGNC Symbol;Acc:8549]	protein_coding	14.8893	14.6232	15.6284	13.2384	12.5649	12.6884	15.0469	12.8305	-0.229888	0.0336996	0.00575572
ENSG00000011638	TMEM159	transmembrane protein 159 [Source:HGNC Symbol;Acc:30136]	protein_coding	13.8503	13.7401	15.307	11.8488	11.7763	11.8728	14.2991	11.8326	-0.273159	0.0356991	0.0037642
ENSG00000230124	RP5-1180C10.2		antisense	1.81051	1.47524	1.72914	1.15218	1.08324	1.39415	1.67163	1.20986	-0.466422	0.0376016	0.00205794
ENSG00000070961	ATP2B1	ATPase, Ca++ transporting, plasma membrane 1 [Source:HGNC Symbol;Acc:814]	protein_coding	15.0429	15.6219	15.1232	13.2225	13.4524	12.5042	15.2627	13.0597	-0.224887	0.0291108	0.0106105
ENSG00000144115	THNSL2	threonine synthase-like 2 (S. cerevisiae) [Source:HGNC Symbol;Acc:25602]	protein_coding	0.838537	0.737379	0.824954	0.574492	0.583019	0.527024	0.80029	0.561512	-0.511207	0.0391183	0.000655969
ENSG00000196449	YRDC	yrdC domain containing (E. coli) [Source:HGNC Symbol;Acc:28905]	protein_coding	10.0326	9.18917	10.4157	8.13478	7.85052	7.73118	9.87918	7.90549	-0.321536	0.0379208	0.00199293
ENSG00000155961	RAB39B	RAB39B, member RAS oncogene family [Source:HGNC Symbol;Acc:16499]	protein_coding	0.136112	0.109568	0.0916883	0.0177074	0.015914	0.0470161	0.112456	0.0268792	-2.0648	0.0399093	0.00040094
ENSG00000163468	CCT3	chaperonin containing TCP1, subunit 3 (gamma) [Source:HGNC Symbol;Acc:1616]	protein_coding	58.7575	61.8322	63.7675	64.7265	68.3903	68.4375	61.4524	67.1848	0.128665	0.0322255	0.0081155
ENSG00000198121	LPAR1	lysophosphatidic acid receptor 1 [Source:HGNC Symbol;Acc:3166]	protein_coding	150.49	149.004	151.994	126.816	133.313	133.054	150.496	131.061	-0.199484	0.0312639	0.00912819
ENSG00000172009	THOP1	thimet oligopeptidase 1 [Source:HGNC Symbol;Acc:11793]	protein_coding	12.917	12.0993	12.4012	13.8158	13.2931	15.1929	12.4725	14.1006	0.177006	0.0368319	0.0036486
ENSG00000213588	ZBTB9	zinc finger and BTB domain containing 9 [Source:HGNC Symbol;Acc:28323]	protein_coding	2.89242	2.87146	2.82902	3.63338	3.53236	3.37754	2.8643	3.51442	0.295107	0.0395846	0.000905065
ENSG00000141873	SLC39A3	solute carrier family 39 (zinc transporter), member 3 [Source:HGNC Symbol;Acc:17128]	protein_coding	5.31003	4.49908	5.25511	5.78241	5.44619	6.31189	5.02141	5.84683	0.219562	0.0340471	0.00645944
ENSG00000221968	FADS3	fatty acid desaturase 3 [Source:HGNC Symbol;Acc:3576]	protein_coding	14.8571	13.795	15.7538	16.4735	15.5271	17.0046	14.802	16.335	0.142179	0.0283901	0.0121452
ENSG00000150990	DHX37	DEAH (Asp-Glu-Ala-His) box polypeptide 37 [Source:HGNC Symbol;Acc:17210]	protein_coding	4.28679	4.19595	4.2291	5.02043	4.44171	5.2291	4.23728	4.89708	0.208784	0.0379208	0.00274226
ENSG00000123485	HJURP	Holliday junction recognition protein [Source:HGNC Symbol;Acc:25444]	protein_coding	7.14357	7.77444	7.80766	8.41686	8.6652	8.79454	7.57522	8.62553	0.187326	0.038136	0.00255571
ENSG00000197405	C5AR1	complement component 5a receptor 1 [Source:HGNC Symbol;Acc:1338]	protein_coding	0.774072	0.744207	0.948061	0.485845	0.500148	0.422181	0.822114	0.469391	-0.808546	0.040152	0.000559186
ENSG00000102384	CENPI	centromere protein I [Source:HGNC Symbol;Acc:3968]	protein_coding	2.83606	2.95413	2.84748	3.3225	3.59861	3.34772	2.87922	3.42294	0.24956	0.0398041	0.00111662
ENSG00000132382	MYBBP1A	MYB binding protein (P160) 1a [Source:HGNC Symbol;Acc:7546]	protein_coding	10.3773	10.3475	9.1883	12.1692	10.8333	11.1778	9.97104	11.3934	0.192387	0.0335465	0.00758711
ENSG00000139567	ACVRL1	activin A receptor type II-like 1 [Source:HGNC Symbol;Acc:175]	protein_coding	7.77144	7.71049	7.74128	6.38453	6.18961	6.84179	7.74107	6.47198	-0.258326	0.0375471	0.00381952
ENSG00000157423	HYDIN	HYDIN, axonemal central pair apparatus protein [Source:HGNC Symbol;Acc:19368]	protein_coding	0.112389	0.0981019	0.0945316	0.0625366	0.0486826	0.0724985	0.101674	0.0612392	-0.731427	0.0406436	0.000733753
ENSG00000196151	WDSUB1	WD repeat, sterile alpha motif and U-box domain containing 1 [Source:HGNC Symbol;Acc:26697]	protein_coding	4.3052	3.98496	4.41992	3.23646	3.13509	3.25466	4.23669	3.20874	-0.400933	0.0405835	0.000861968
ENSG00000172059	KLF11	Kruppel-like factor 11 [Source:HGNC Symbol;Acc:11811]	protein_coding	1.30297	1.31967	1.3815	0.933199	0.990617	0.987527	1.33471	0.970448	-0.459806	0.0407542	0.000800397
ENSG00000125817	CENPB	centromere protein B, 80kDa [Source:HGNC Symbol;Acc:1852]	protein_coding	30.853	29.1772	30.0793	32.5329	32.3476	34.1961	30.0365	33.0255	0.136865	0.038136	0.00365178
ENSG00000143367	TUFT1	tuftelin 1 [Source:HGNC Symbol;Acc:12422]	protein_coding	11.3063	10.5016	11.7385	9.29088	8.3383	9.79778	11.1821	9.14232	-0.290561	0.0381694	0.0037685
ENSG00000126062	TMEM115	transmembrane protein 115 [Source:HGNC Symbol;Acc:30055]	protein_coding	20.8751	18.865	19.8802	22.4208	20.9201	24.1524	19.8734	22.4978	0.178941	0.0367359	0.00521196
ENSG00000169683	LRRC45	leucine rich repeat containing 45 [Source:HGNC Symbol;Acc:28302]	protein_coding	6.71382	6.03115	6.48227	5.03656	4.80219	5.52267	6.40908	5.12047	-0.32384	0.0387505	0.00319787
ENSG00000261379	RP11-395N3.1		lincRNA	2.66591	2.27462	2.30647	3.1859	3.18035	3.96185	2.41566	3.4427	0.51112	0.0412579	0.000875954
ENSG00000072952	MRVI1	murine retrovirus integration site 1 homolog [Source:HGNC Symbol;Acc:7237]	protein_coding	13.782	14.0173	12.2882	14.8943	15.5151	14.469	13.3625	14.9595	0.16287	0.0312315	0.0110096
ENSG00000159128	IFNGR2	interferon gamma receptor 2 (interferon gamma transducer 1) [Source:HGNC Symbol;Acc:5440]	protein_coding	11.7509	11.6522	13.2041	13.6526	13.7683	13.7934	12.2024	13.7381	0.171018	0.0381532	0.00429018
ENSG00000123119	NECAB1	N-terminal EF-hand calcium binding protein 1 [Source:HGNC Symbol;Acc:20983]	protein_coding	0.739533	0.617748	0.565339	0.474588	0.38735	0.424322	0.640873	0.428754	-0.57989	0.0406436	0.00181602
ENSG00000214575	CPEB1	cytoplasmic polyadenylation element binding protein 1 [Source:HGNC Symbol;Acc:21744]	protein_coding	0.409637	0.419967	0.429531	0.253889	0.301597	0.283663	0.419712	0.279716	-0.585436	0.0418916	0.000568224
ENSG00000197170	PSMD12	proteasome (prosome, macropain) 26S subunit, non-ATPase, 12 [Source:HGNC Symbol;Acc:9557]	protein_coding	12.6758	12.2899	12.7444	13.6638	13.8307	14.3622	12.57	13.9522	0.15051	0.0401472	0.00235671
ENSG00000163512	AZI2	5-azacytidine induced 2 [Source:HGNC Symbol;Acc:24002]	protein_coding	6.09147	6.09995	5.95901	5.12887	5.04281	4.96615	6.05014	5.04594	-0.261845	0.0399093	0.00261524
ENSG00000144136	SLC20A1	solute carrier family 20 (phosphate transporter), member 1 [Source:HGNC Symbol;Acc:10946]	protein_coding	26.3672	24.8791	26.4238	28.5294	27.2484	28.7578	25.89	28.1785	0.122202	0.0346427	0.00788572
ENSG00000226278	PSPHP1	phosphoserine phosphatase pseudogene 1 [Source:HGNC Symbol;Acc:9578]	pseudogene	3.1683	3.39555	2.79839	1.34751	0.747986	1.68369	3.12075	1.25973	-1.30878	0.042256	0.000451718
ENSG00000164970	FAM219A	family with sequence similarity 219, member A [Source:HGNC Symbol;Acc:19920]	protein_coding	8.77956	9.3654	10.0654	10.7598	10.7516	10.3775	9.40346	10.6296	0.176829	0.0372118	0.00549887
ENSG00000148690	FRA10AC1	fragile site, folic acid type, rare, fra(10)(q23.3) or fra(10)(q24.2) candidate 1 [Source:HGNC Symbol;Acc:1162]	protein_coding	4.10423	4.06363	4.35279	3.4799	3.40559	3.5342	4.17355	3.47323	-0.264997	0.0401472	0.00258249
ENSG00000137809	ITGA11	integrin, alpha 11 [Source:HGNC Symbol;Acc:6136]	protein_coding	43.4506	46.7018	39.1626	51.684	49.9563	46.8976	43.105	49.5127	0.199942	0.0359518	0.00681759
ENSG00000106246	PTCD1	pentatricopeptide repeat domain 1 [Source:HGNC Symbol;Acc:22198]	protein_coding	0.606946	0.539059	0.647057	0.412092	0.376829	0.439964	0.597687	0.409628	-0.545076	0.0419636	0.000836215
ENSG00000130741	EIF2S3	eukaryotic translation initiation factor 2, subunit 3 gamma, 52kDa [Source:HGNC Symbol;Acc:3267]	protein_coding	41.5424	40.8064	42.4513	36.1745	35.4318	35.7633	41.6	35.7899	-0.217032	0.0380668	0.00473947
ENSG00000024526	DEPDC1	DEP domain containing 1 [Source:HGNC Symbol;Acc:22949]	protein_coding	3.29146	3.42747	3.64201	3.97014	3.93963	4.01	3.45364	3.97326	0.202202	0.0415166	0.00153835
ENSG00000125249	RAP2A	RAP2A, member of RAS oncogene family [Source:HGNC Symbol;Acc:9861]	protein_coding	8.45355	8.25182	8.54308	6.84315	7.02264	7.27531	8.41615	7.04704	-0.256144	0.040367	0.00269166
ENSG00000006282	SPATA20	spermatogenesis associated 20 [Source:HGNC Symbol;Acc:26125]	protein_coding	18.2661	16.4531	18.0665	15.225	14.804	14.9563	17.5953	14.9951	-0.230696	0.0353377	0.00775824
ENSG00000149930	TAOK2	TAO kinase 2 [Source:HGNC Symbol;Acc:16835]	protein_coding	10.0265	9.31286	9.33859	10.5792	10.1381	10.8129	9.55931	10.5101	0.136795	0.0351477	0.00794951
ENSG00000197694	SPTAN1	spectrin, alpha, non-erythrocytic 1 [Source:HGNC Symbol;Acc:11273]	protein_coding	41.4239	43.389	36.525	45.7065	44.6804	44.9676	40.446	45.1181	0.157712	0.0229163	0.020278
ENSG00000151458	ANKRD50	ankyrin repeat domain 50 [Source:HGNC Symbol;Acc:29223]	protein_coding	6.1013	6.34227	5.77395	6.9188	7.12294	6.43062	6.0725	6.82412	0.168352	0.0337812	0.00943042
ENSG00000171388	APLN	apelin [Source:HGNC Symbol;Acc:16665]	protein_coding	0.760551	0.935779	0.834721	1.16933	1.02203	1.3562	0.843684	1.18252	0.487091	0.0414094	0.00183409
ENSG00000155511	GRIA1	glutamate receptor, ionotropic, AMPA 1 [Source:HGNC Symbol;Acc:4571]	protein_coding	1.09716	1.29664	1.23528	0.977481	0.853522	0.903219	1.20969	0.911407	-0.408473	0.0395846	0.00366087
ENSG00000141429	GALNT1	UDP-N-acetyl-alpha-D-galactosamine:polypeptide N-acetylgalactosaminyltransferase 1 (GalNAc-T1) [Source:HGNC Symbol;Acc:4123]	protein_coding	16.8343	16.5907	17.577	18.563	19.7047	18.16	17.0007	18.8092	0.14585	0.0375471	0.00575117
ENSG00000108294	PSMB3	proteasome (prosome, macropain) subunit, beta type, 3 [Source:HGNC Symbol;Acc:9540]	protein_coding	85.7221	84.2978	91.8854	94.052	97.3547	98.6284	87.3018	96.6784	0.147182	0.0393593	0.00395972
ENSG00000226318	RP11-474D14.2		pseudogene	1.45894	1.3551	1.11041	2.35894	2.37588	1.87181	1.30815	2.20221	0.751424	0.0427758	0.00056123
ENSG00000259343	RP11-761I4.3		antisense	0.990218	0.766452	0.844621	0.460078	0.454828	0.325755	0.867097	0.413554	-1.06812	0.0430676	0.000335269
ENSG00000164053	ATRIP	ATR interacting protein [Source:HGNC Symbol;Acc:33499]	protein_coding	1.99188	2.06624	1.97504	2.48234	2.5057	2.51584	2.01105	2.50129	0.314722	0.0428874	0.000622678
ENSG00000166451	CENPN	centromere protein N [Source:HGNC Symbol;Acc:30873]	protein_coding	3.8419	3.99072	3.43083	4.18054	4.73679	4.47234	3.75448	4.46322	0.249472	0.0388366	0.00471953
ENSG00000068885	IFT80	intraflagellar transport 80 homolog (Chlamydomonas) [Source:HGNC Symbol;Acc:29262]	protein_coding	3.23146	3.08382	3.17194	2.57485	2.60429	2.5647	3.16241	2.58128	-0.292938	0.0424673	0.00111327
ENSG00000135486	HNRNPA1	heterogeneous nuclear ribonucleoprotein A1 [Source:HGNC Symbol;Acc:5031]	protein_coding	37.8734	40.2451	41.4076	30.9865	35.7899	33.8276	39.842	33.5347	-0.248636	0.0343937	0.00921551
ENSG00000166311	SMPD1	sphingomyelin phosphodiesterase 1, acid lysosomal [Source:HGNC Symbol;Acc:11120]	protein_coding	42.2142	39.0167	41.5543	45.3698	44.3434	44.3669	40.9284	44.6934	0.126959	0.0364973	0.00720057
ENSG00000103226	NOMO3	NODAL modulator 3 [Source:HGNC Symbol;Acc:25242]	protein_coding	53.7086	57.7767	52.2824	60.9457	58.8998	60.2453	54.5892	60.0303	0.137074	0.031461	0.0123251
ENSG00000228328	RP11-516A11.1		pseudogene	3.18558	3.43228	4.04987	4.35977	4.93871	4.7536	3.55591	4.68403	0.39753	0.0423836	0.0014212
ENSG00000204560	DHX16	DEAH (Asp-Glu-Ala-His) box polypeptide 16 [Source:HGNC Symbol;Acc:2739]	protein_coding	11.8792	11.874	12.0637	13.0746	13.1096	13.6915	11.939	13.2919	0.154871	0.0417679	0.00234352
ENSG00000164164	OTUD4	OTU domain containing 4 [Source:HGNC Symbol;Acc:24949]	protein_coding	6.32947	6.15863	5.92666	6.87936	6.82725	6.66602	6.13825	6.79088	0.145771	0.0379208	0.00645746
ENSG00000134072	CAMK1	calcium/calmodulin-dependent protein kinase I [Source:HGNC Symbol;Acc:1459]	protein_coding	9.27252	9.03615	10.0213	10.6331	10.684	10.9154	9.44331	10.7442	0.186191	0.0423836	0.00202271
ENSG00000133706	LARS	leucyl-tRNA synthetase [Source:HGNC Symbol;Acc:6512]	protein_coding	19.6518	19.9271	19.664	16.8961	17.277	16.967	19.7476	17.0467	-0.212185	0.0379208	0.00669015
ENSG00000230630	DNM3OS	DNM3 opposite strand/antisense RNA [Source:HGNC Symbol;Acc:41228]	antisense	7.55926	7.95741	7.04663	4.73497	5.54838	5.36732	7.5211	5.21689	-0.527754	0.043699	0.00111435
ENSG00000255150	EID3	EP300 interacting inhibitor of differentiation 3 [Source:HGNC Symbol;Acc:32961]	protein_coding	1.499	1.47303	1.65633	0.960926	1.04775	0.769177	1.54279	0.925951	-0.73653	0.0443414	0.00058647
ENSG00000152127	MGAT5	mannosyl (alpha-1,6-)-glycoprotein beta-1,6-N-acetyl-glucosaminyltransferase [Source:HGNC Symbol;Acc:7049]	protein_coding	38.5752	40.4548	35.029	42.0565	43.6415	41.1498	38.0197	42.2826	0.153319	0.028713	0.0162888
ENSG00000125450	NUP85	nucleoporin 85kDa [Source:HGNC Symbol;Acc:8734]	protein_coding	6.88953	6.46094	7.21411	7.71414	7.69559	7.94461	6.85486	7.78478	0.183528	0.0426905	0.00232974
ENSG00000108883	EFTUD2	elongation factor Tu GTP binding domain containing 2 [Source:HGNC Symbol;Acc:30858]	protein_coding	23.9739	23.9265	23.2698	25.2706	25.8345	27.0368	23.7234	26.0473	0.134824	0.0404402	0.00466036
ENSG00000100413	POLR3H	polymerase (RNA) III (DNA directed) polypeptide H (22.9kD) [Source:HGNC Symbol;Acc:30349]	protein_coding	5.92382	6.17146	6.17442	7.01768	6.58112	6.76922	6.0899	6.78934	0.156853	0.0401216	0.00526539
ENSG00000100027	YPEL1	yippee-like 1 (Drosophila) [Source:HGNC Symbol;Acc:12845]	protein_coding	0.479131	0.564123	0.48971	0.307272	0.337298	0.297205	0.510988	0.313925	-0.702871	0.04479	0.000613621
ENSG00000163818	LZTFL1	leucine zipper transcription factor-like 1 [Source:HGNC Symbol;Acc:6741]	protein_coding	2.46454	2.34246	2.48295	2.0398	1.91712	1.70871	2.42998	1.88854	-0.363672	0.0441017	0.00133396
ENSG00000038358	EDC4	enhancer of mRNA decapping 4 [Source:HGNC Symbol;Acc:17157]	protein_coding	15.8324	15.0961	14.6369	16.8174	16.3246	16.9292	15.1884	16.6904	0.136044	0.0380125	0.00746498
ENSG00000129173	E2F8	E2F transcription factor 8 [Source:HGNC Symbol;Acc:24727]	protein_coding	0.474585	0.646992	0.534382	0.697074	0.986694	0.80644	0.551987	0.830069	0.588599	0.0439453	0.00156113
ENSG00000168275	C1orf31	chromosome 1 open reading frame 31 [Source:HGNC Symbol;Acc:18025]	protein_coding	11.2595	9.18904	11.6443	8.37731	8.18705	8.14998	10.6976	8.23811	-0.376901	0.0417158	0.0038424
ENSG00000003096	KLHL13	kelch-like 13 (Drosophila) [Source:HGNC Symbol;Acc:22931]	protein_coding	1.89472	2.03062	2.0626	1.41615	1.52566	1.73452	1.99598	1.55878	-0.356682	0.0425144	0.00305187
ENSG00000143158	MPC2	mitochondrial pyruvate carrier 2 [Source:HGNC Symbol;Acc:24515]	protein_coding	9.48413	9.34161	9.83381	10.6035	11.3546	10.7515	9.55319	10.9032	0.190696	0.0439724	0.00171383
ENSG00000101945	SUV39H1	suppressor of variegation 3-9 homolog 1 (Drosophila) [Source:HGNC Symbol;Acc:11479]	protein_coding	1.67152	1.57815	1.6451	1.98339	2.14223	2.0938	1.63159	2.07314	0.345537	0.0450911	0.000618068
ENSG00000088387	DOCK9	dedicator of cytokinesis 9 [Source:HGNC Symbol;Acc:14132]	protein_coding	2.86247	2.78145	2.25377	3.41495	3.28514	2.96084	2.63256	3.22031	0.290731	0.0424673	0.00342704
ENSG00000207870	MIR221	microRNA 221 [Source:HGNC Symbol;Acc:31601]	miRNA	23.1308	20.9474	23.9034	31.4084	31.4387	33.208	22.6605	32.0184	0.498717	0.0455055	0.000396409
ENSG00000116237	ICMT	isoprenylcysteine carboxyl methyltransferase [Source:HGNC Symbol;Acc:5350]	protein_coding	26.1835	25.9561	24.9736	27.5674	28.4969	28.2258	25.7044	28.0967	0.128384	0.0399395	0.00600558
ENSG00000105085	MED26	mediator complex subunit 26 [Source:HGNC Symbol;Acc:2376]	protein_coding	1.23863	0.927803	0.972618	1.39697	1.39271	1.47505	1.04635	1.42158	0.442124	0.0448269	0.00124056
ENSG00000136699	SMPD4	sphingomyelin phosphodiesterase 4, neutral membrane (neutral sphingomyelinase-3) [Source:HGNC Symbol;Acc:32949]	protein_coding	8.89904	8.48006	8.26869	9.46968	9.25018	9.55617	8.54926	9.42534	0.140746	0.0399415	0.00639299
ENSG00000112941	PAPD7	PAP associated domain containing 7 [Source:HGNC Symbol;Acc:16705]	protein_coding	7.14337	6.5894	7.09682	7.606	7.66187	8.11196	6.9432	7.79328	0.16663	0.0432795	0.00314812
ENSG00000185485	SDHAP1	succinate dehydrogenase complex, subunit A, flavoprotein pseudogene 1 [Source:HGNC Symbol;Acc:32455]	pseudogene	5.7577	6.273	5.31503	7.16959	6.31313	6.74139	5.78191	6.74137	0.221496	0.0362174	0.0102241
ENSG00000163827	LRRC2	leucine rich repeat containing 2 [Source:HGNC Symbol;Acc:14676]	protein_coding	1.0975	1.00362	1.12246	1.26219	1.43365	1.38254	1.07453	1.35946	0.33933	0.0454776	0.000981248
ENSG00000149527	PLCH2	phospholipase C, eta 2 [Source:HGNC Symbol;Acc:29037]	protein_coding	0.730976	0.775159	0.812818	0.893208	0.934225	1.01969	0.772984	0.949042	0.296032	0.0450911	0.00138535
ENSG00000104889	RNASEH2A	ribonuclease H2, subunit A [Source:HGNC Symbol;Acc:18518]	protein_coding	15.234	14.7448	14.5309	16.8114	16.8507	17.9654	14.8366	17.2092	0.214024	0.0453426	0.00123516
ENSG00000067113	PPAP2A	phosphatidic acid phosphatase type 2A [Source:HGNC Symbol;Acc:9228]	protein_coding	5.91608	5.72948	6.05752	4.38187	4.5652	4.959	5.90103	4.63536	-0.348287	0.0447893	0.00180571
ENSG00000229939	RP11-111F16.2		pseudogene	23.3827	23.5712	26.7722	19.679	17.3943	17.0342	24.5754	18.0358	-0.446347	0.044586	0.00205794
ENSG00000164237	CMBL	carboxymethylenebutenolidase homolog (Pseudomonas) [Source:HGNC Symbol;Acc:25090]	protein_coding	7.75028	7.82079	7.44444	6.0745	6.43533	6.48622	7.67184	6.33202	-0.276907	0.043699	0.00308671
ENSG00000116455	WDR77	WD repeat domain 77 [Source:HGNC Symbol;Acc:29652]	protein_coding	9.05957	8.24627	8.36358	9.46272	9.90291	9.89923	8.55647	9.75495	0.189118	0.0443981	0.00243275
ENSG00000160193	WDR4	WD repeat domain 4 [Source:HGNC Symbol;Acc:12756]	protein_coding	4.57674	4.73653	4.46018	5.53095	5.10318	5.58734	4.59115	5.40715	0.236014	0.0445139	0.00237146
ENSG00000240184	PCDHGC3	protocadherin gamma subfamily C, 3 [Source:HGNC Symbol;Acc:8716]	protein_coding	20.1051	21.1699	16.4712	16.3626	15.5993	15.1172	19.2487	15.693	-0.294637	0.019724	0.027225
ENSG00000163067	ZNF2	zinc finger protein 2 [Source:HGNC Symbol;Acc:12991]	protein_coding	0.8669	0.960331	0.898593	1.17952	1.1019	1.46289	0.908608	1.2481	0.458007	0.0456357	0.00131534
ENSG00000152784	PRDM8	PR domain containing 8 [Source:HGNC Symbol;Acc:13993]	protein_coding	6.59251	6.47744	6.26587	7.19216	6.92367	7.72834	6.44527	7.28139	0.175973	0.0422516	0.00488084
ENSG00000256671	LIMS3L	LIM and senescent cell antigen-like domains 3-like [Source:HGNC Symbol;Acc:39941]	protein_coding	0.442443	0.379342	0.390787	0.199244	0.104454	0.161647	0.404191	0.155115	-1.3817	0.046801	0.000339006
ENSG00000122966	CIT	citron (rho-interacting, serine/threonine kinase 21) [Source:HGNC Symbol;Acc:1985]	protein_coding	2.32707	2.37357	2.08018	2.50197	2.61817	2.6365	2.26027	2.58555	0.193972	0.0425144	0.00464052
ENSG00000024422	EHD2	EH-domain containing 2 [Source:HGNC Symbol;Acc:3243]	protein_coding	143.898	140.807	130.988	151.997	146.265	154.138	138.564	150.8	0.122082	0.0286888	0.0186392
ENSG00000115648	MLPH	melanophilin [Source:HGNC Symbol;Acc:29643]	protein_coding	4.08884	3.86466	4.12528	3.50768	3.17716	3.04844	4.02626	3.24443	-0.311476	0.0450911	0.00233826
ENSG00000164535	DAGLB	diacylglycerol lipase, beta [Source:HGNC Symbol;Acc:28923]	protein_coding	4.03223	3.7709	3.91194	4.44088	4.16546	4.76993	3.90502	4.45875	0.191311	0.0427887	0.00465664
ENSG00000160613	PCSK7	proprotein convertase subtilisin/kexin type 7 [Source:HGNC Symbol;Acc:8748]	protein_coding	9.82111	9.44398	9.58733	8.57841	8.25435	7.96754	9.61747	8.26676	-0.218335	0.0367834	0.0107518
ENSG00000166822	TMEM170A	transmembrane protein 170A [Source:HGNC Symbol;Acc:29577]	protein_coding	1.9396	1.82789	1.7973	1.43873	1.40739	1.44477	1.85493	1.43029	-0.375052	0.0464935	0.0011194
ENSG00000128536	CDHR3	cadherin-related family member 3 [Source:HGNC Symbol;Acc:26308]	protein_coding	0.766382	0.844553	0.909807	0.56188	0.691962	0.656204	0.840247	0.636682	-0.400241	0.0408416	0.0067741
ENSG00000071282	LMCD1	LIM and cysteine-rich domains 1 [Source:HGNC Symbol;Acc:6633]	protein_coding	2.94855	3.13976	3.09378	3.75565	4.17581	3.47311	3.0607	3.80152	0.312717	0.0455747	0.00204606
ENSG00000138002	IFT172	intraflagellar transport 172 homolog (Chlamydomonas) [Source:HGNC Symbol;Acc:30391]	protein_coding	3.67984	3.89968	3.41847	3.09301	2.99773	2.91947	3.666	3.0034	-0.287609	0.0408416	0.00679492
ENSG00000142197	DOPEY2	dopey family member 2 [Source:HGNC Symbol;Acc:1291]	protein_coding	3.27393	3.55988	2.90232	4.06155	3.99973	3.58905	3.24538	3.88344	0.258949	0.0443762	0.003394
ENSG00000233429	HOTAIRM1	HOXA transcript antisense RNA, myeloid-specific 1 [Source:HGNC Symbol;Acc:37117]	antisense	3.29732	2.50799	3.005	3.51277	4.09801	4.25991	2.93677	3.9569	0.430139	0.0457055	0.00206907
ENSG00000070010	UFD1L	ubiquitin fusion degradation 1 like (yeast) [Source:HGNC Symbol;Acc:12520]	protein_coding	6.79909	6.81463	7.11071	7.50718	7.62341	7.78176	6.90814	7.63745	0.144793	0.0447893	0.00304863
ENSG00000142541	RPL13A	ribosomal protein L13a [Source:HGNC Symbol;Acc:10304]	protein_coding	188.885	200.337	208.337	166.456	177.388	173.904	199.187	172.583	-0.206832	0.0259963	0.0220286
ENSG00000024862	CCDC28A	coiled-coil domain containing 28A [Source:HGNC Symbol;Acc:21098]	protein_coding	5.93152	6.14126	6.77653	4.50825	4.90298	5.12219	6.28311	4.84448	-0.375137	0.0450911	0.00325624
ENSG00000079246	XRCC5	X-ray repair complementing defective repair in Chinese hamster cells 5 (double-strand-break rejoining) [Source:HGNC Symbol;Acc:12833]	protein_coding	62.4454	62.2297	65.7035	66.3816	71.9361	69.0276	63.4595	69.1151	0.123164	0.0396559	0.00876085
ENSG00000261355	RP11-698N11.4		sense_overlapping	0.951724	0.699154	0.921917	0.596558	0.493144	0.567834	0.857598	0.552512	-0.634296	0.046908	0.00155888
ENSG00000168291	PDHB	pyruvate dehydrogenase (lipoamide) beta [Source:HGNC Symbol;Acc:8808]	protein_coding	16.6542	16.5273	18.2897	18.89	18.7426	18.9409	17.1571	18.8578	0.136359	0.0409597	0.00757938
ENSG00000119396	RAB14	RAB14, member RAS oncogene family [Source:HGNC Symbol;Acc:16524]	protein_coding	22.9004	22.4923	23.5405	24.25	26.671	25.2509	22.9777	25.3906	0.14406	0.044415	0.00426939
ENSG00000130935	NOL11	nucleolar protein 11 [Source:HGNC Symbol;Acc:24557]	protein_coding	14.646	14.4641	15.8201	16.5274	16.4931	17.3165	14.9767	16.779	0.163935	0.0450911	0.00364591
ENSG00000137942	FNBP1L	formin binding protein 1-like [Source:HGNC Symbol;Acc:20851]	protein_coding	4.84498	5.00076	5.34586	3.95712	4.42446	4.23837	5.06387	4.20665	-0.267567	0.0399093	0.00893551
ENSG00000119681	LTBP2	latent transforming growth factor beta binding protein 2 [Source:HGNC Symbol;Acc:6715]	protein_coding	39.1087	39.3238	34.6754	42.7852	41.8188	40.3187	37.7027	41.6409	0.143335	0.026444	0.0225008
ENSG00000143393	PI4KB	phosphatidylinositol 4-kinase, catalytic, beta [Source:HGNC Symbol;Acc:8984]	protein_coding	18.4499	18.6528	18.7254	20.0056	20.3546	20.7449	18.6093	20.3684	0.130305	0.0456357	0.00350981
ENSG00000260549	MT1L	metallothionein 1L (gene/pseudogene) [Source:HGNC Symbol;Acc:7404]	pseudogene	20.7389	22.9286	24.8081	28.4903	27.5499	26.4628	22.8252	27.501	0.268857	0.0455726	0.00373841
ENSG00000139631	CSAD	cysteine sulfinic acid decarboxylase [Source:HGNC Symbol;Acc:18966]	protein_coding	3.91558	3.30627	3.73689	2.89612	2.32369	3.10807	3.65291	2.77596	-0.39606	0.0443325	0.00510111
ENSG00000166741	NNMT	nicotinamide N-methyltransferase [Source:HGNC Symbol;Acc:7861]	protein_coding	31.2274	31.4945	34.9602	34.9197	36.1824	36.912	32.5607	36.0047	0.145054	0.0426905	0.00676442
ENSG00000106546	AHR	aryl hydrocarbon receptor [Source:HGNC Symbol;Acc:348]	protein_coding	5.81092	5.61466	5.62726	4.67122	4.87779	4.75828	5.68428	4.76909	-0.253262	0.045898	0.00365788
ENSG00000251136	RP11-37B2.1		lincRNA	0.95542	0.871644	0.89323	0.693288	0.632999	0.671046	0.906765	0.665778	-0.445687	0.048629	0.00100981
ENSG00000253667	RP11-30L15.4		pseudogene	0.407205	0.36827	0.383893	0.146379	0.14095	0.249852	0.386456	0.17906	-1.10986	0.0496242	0.000222269
ENSG00000161847	RAVER1	ribonucleoprotein, PTB-binding 1 [Source:HGNC Symbol;Acc:30296]	protein_coding	15.0846	13.0303	13.6576	16.0889	14.6769	15.799	13.9242	15.5216	0.156688	0.0336778	0.016498
ENSG00000136807	CDK9	cyclin-dependent kinase 9 [Source:HGNC Symbol;Acc:1780]	protein_coding	12.1813	11.9445	12.8547	13.9714	13.3868	13.934	12.3268	13.7641	0.159107	0.0461738	0.00402521
ENSG00000117614	SYF2	SYF2 homolog, RNA splicing factor (S. cerevisiae) [Source:HGNC Symbol;Acc:19824]	protein_coding	10.8722	11.2116	12.3189	9.25749	9.81502	9.8288	11.4676	9.63377	-0.25139	0.0387505	0.0115403
ENSG00000244734	HBB	hemoglobin, beta [Source:HGNC Symbol;Acc:4827]	protein_coding	0.268293	0.294506	0.403278	0.618741	0.620235	0.863554	0.322026	0.700844	1.12192	0.0498482	0.000468664
ENSG00000071246	VASH1	vasohibin 1 [Source:HGNC Symbol;Acc:19964]	protein_coding	2.74344	2.82738	2.37105	2.18799	1.90781	2.1425	2.64729	2.07944	-0.348326	0.042689	0.00769837
ENSG00000180332	KCTD4	potassium channel tetramerisation domain containing 4 [Source:HGNC Symbol;Acc:23227]	protein_coding	0.375234	0.278823	0.330895	0.536975	0.842336	0.531418	0.328317	0.636909	0.955998	0.049881	0.000559186
ENSG00000168078	PBK	PDZ binding kinase [Source:HGNC Symbol;Acc:18282]	protein_coding	8.54985	9.15574	10.3636	10.2629	11.5293	11.3794	9.35642	11.0572	0.240953	0.047263	0.00336266
ENSG00000185946	RNPC3	RNA-binding region (RNP1, RRM) containing 3 [Source:HGNC Symbol;Acc:18666]	protein_coding	1.39088	1.20577	1.49057	1.58931	1.80914	1.56944	1.36241	1.65596	0.281513	0.0443078	0.00638229
ENSG00000204390	HSPA1L	heat shock 70kDa protein 1-like [Source:HGNC Symbol;Acc:5234]	protein_coding	1.15758	0.883576	0.947521	0.633692	0.62311	0.633432	0.996227	0.630078	-0.660943	0.0497706	0.000988453
ENSG00000183864	TOB2	transducer of ERBB2, 2 [Source:HGNC Symbol;Acc:11980]	protein_coding	12.4572	12.4895	11.7181	13.3012	13.4345	13.8439	12.2216	13.5265	0.146357	0.0445146	0.00638699
ENSG00000146540	C7orf50	chromosome 7 open reading frame 50 [Source:HGNC Symbol;Acc:22421]	protein_coding	9.84284	8.80282	9.9426	10.3941	10.256	11.7226	9.52942	10.7909	0.179356	0.0443745	0.00672235
ENSG00000100644	HIF1A	hypoxia inducible factor 1, alpha subunit (basic helix-loop-helix transcription factor) [Source:HGNC Symbol;Acc:4910]	protein_coding	62.5293	62.0206	61.2696	67.0527	67.8258	66.0012	61.9399	66.9599	0.112429	0.0420392	0.00912819
ENSG00000080824	HSP90AA1	heat shock protein 90kDa alpha (cytosolic), class A member 1 [Source:HGNC Symbol;Acc:5253]	protein_coding	219.842	226.472	236.124	238.122	248.891	252.046	227.479	246.353	0.114993	0.0408416	0.0103902
[truncated: 61 more rows]

## Sheet: MRC-5 PD42 to PD52
ensembl_gene_id	external_gene_id	description	gene_biotype	MRC_5_PD42_1	MRC_5_PD42_2	MRC_5_PD42_3	MRC_5_PD52_1	MRC_5_PD52_2	MRC_5_PD52_3	PD42 mean RPKM	PD52 mean RPKM	log2FC	FDR.DESeq	FDR.edgeR
[truncated: 1,248 more rows]

[truncated: 8 more sheets: MRC-5 PD52 to PD62, MRC-5 PD62 to PD72, MRC-5 PD32 to PD72, HFF PD16 to PD26, HFF PD26 to PD46, HFF PD46 to PD64, HFF PD64 to PD74, HFF PD16 to PD74]
