# Supplementary material for: Similarities in Gene Expression Profiles during In Vitro Aging of Primary Human Embryonic Lung and Foreskin Fibroblasts
Source: Biomed Res Int. 2015 Aug 3;2015:731938. doi: 10.1155/2015/731938 (PMC4538583; doi:10.1155/2015/731938)
Supplement: Supplementary file 1 — Suppl. Figure 1: (A) Growth curve of MRC-5 and HFF fibroblasts derived from a single vial and maintained in culture as triplicates from an early PD until senescence at late PDs. Data points of all measurements are displayed (not the mean). PDs specified in the plot denoted the time points were the total RNA was collected and subjected to RNA-seq. Black line denotes MRC-5 and green denotes HFF (B) Percentage of SA-β Gal positive cells at different time points of their growth in culture in MRC-5 and HFF fibroblasts. Each curve is measured in triplicate, the mean value is displayed with error bar (± S.E). Red line denotes MRC-5 and black denotes HFF. Suppl. Figure 2: TreeMaps produced using REVIGO () summarizing: (A) 12 GO cellular component (CC) terms found for cluster 3. (B) 21 GO CC terms found for cluster 5. Both clusters contain up-regulated genes but exhibit differences between MRC-5 and HFF. Suppl. Figure 3: TreeMaps produced using REVIGO () summarizing: (A) 59 GO biological processes (BP) terms found for cluster 2. (B) 162 GO BP terms found for cluster 4. Both clusters contain down-regulated genes. Suppl. Figure 4: TreeMaps produced using REVIGO () summarizing 24 GO BP terms found for cluster 1. Suppl. Figure 5: Venn plots showing the number of detected significantly monotonically expression pattern. (A, B): up-/down-regulated in both MRC-5 and HFF. (C) up-regulated in MRC-5 and down-regulated in HFF. (D): vice versa of (C). Suppl. Figure 6: Functional association networks generated using (A) STRING DB and (B) Cognoscente including 23 genes found to be monotonically expressed across the five PD. (A) Only connections between four genes were found using STRING DB. Different line colors represent the types of evidence for the association, explained on the right. (B) Nodes outlined in red are the 23 input genes. There were no interactions found for PCDHB16. 19 intermediates were included by the tool. The edge colors indicate the type of interaction, as explained in [file 731938.f1.zip › mat.731938.v2/SupplTable2_FCM_result_table_MRC5_HFF.xls]

## Sheet: fcm_result_matrix
				mean RPKM values
ensembl_gene_id	external_gene_id	description	gene_biotype	HFF PD16	HFF PD26	HFF PD46	HFF PD64	HFF PD74	MRC-5 PD32	MRC-5 PD42	MRC-5 PD52	MRC-5 PD62	MRC-5 PD72	Cluster membership
ENSG00000008118	CAMK1G	calcium/calmodulin-dependent protein kinase IG [Source:HGNC Symbol;Acc:14585]	protein_coding	0.439023	0.117119	0.0174803	0.00703198	0.0124682	1.16234	0.920641	0.749601	0.375064	0.292788	1
ENSG00000008513	ST3GAL1	ST3 beta-galactoside alpha-2,3-sialyltransferase 1 [Source:HGNC Symbol;Acc:10862]	protein_coding	10.9404	8.0465	6.80428	5.72904	3.50611	14.5953	14.0845	13.4366	15.1106	7.25582	1
ENSG00000008517	IL32	interleukin 32 [Source:HGNC Symbol;Acc:16830]	protein_coding	0.796662	5.12746	2.94945	1.90198	2.67197	8.1791	9.72181	9.41994	7.92612	3.38829	1
ENSG00000013293	SLC7A14	solute carrier family 7 (orphan transporter), member 14 [Source:HGNC Symbol;Acc:29326]	protein_coding	0.212438	0.881863	0.608273	0.760709	1.46055	4.72527	3.61016	4.79329	3.51406	0.975189	1
ENSG00000017483	SLC38A5	solute carrier family 38, member 5 [Source:HGNC Symbol;Acc:18070]	protein_coding	0.233664	0.282037	2.08709	1.66746	0.568184	7.80132	7.55818	6.63169	6.79101	0.898413	1
ENSG00000018625	ATP1A2	ATPase, Na+/K+ transporting, alpha 2 polypeptide [Source:HGNC Symbol;Acc:800]	protein_coding	0.064885	0.138597	1.11871	1.7091	2.15629	2.83271	0.73012	0.310942	1.7333	0.0385546	1
ENSG00000019549	SNAI2	snail homolog 2 (Drosophila) [Source:HGNC Symbol;Acc:11094]	protein_coding	39.9505	14.9206	20.8025	14.792	12.9873	49.4068	33.5047	31.033	47.2801	22.7917	1
ENSG00000021645	NRXN3	neurexin 3 [Source:HGNC Symbol;Acc:8010]	protein_coding	0.00461051	0.0131054	0.0137279	0.0233838	0.0581555	0.219604	0.305015	0.485447	0.145384	0.211883	1
ENSG00000021826	CPS1	carbamoyl-phosphate synthase 1, mitochondrial [Source:HGNC Symbol;Acc:2323]	protein_coding	0.833411	0.810839	0.624204	0.735334	0.226655	1.18099	1.06209	1.25813	0.955281	0.250642	1
ENSG00000026559	KCNG1	potassium voltage-gated channel, subfamily G, member 1 [Source:HGNC Symbol;Acc:6248]	protein_coding	0.29351	0.258347	0.242494	0.27857	0.0267046	0.863268	0.522224	0.926808	0.880162	0.0989171	1
ENSG00000028137	TNFRSF1B	tumor necrosis factor receptor superfamily, member 1B [Source:HGNC Symbol;Acc:11917]	protein_coding	1.01297	0.779959	0.346128	0.194996	0.0931388	8.14927	7.89117	5.31927	5.13688	2.74766	1
ENSG00000034510	TMSB10	thymosin beta 10 [Source:HGNC Symbol;Acc:11879]	protein_coding	2222.47	1573.61	2062.27	997.847	832.096	3462.27	3320.11	3221.88	3716.8	1601.05	1
ENSG00000037965	HOXC8	homeobox C8 [Source:HGNC Symbol;Acc:5129]	protein_coding	0.185847	0.30195	1.22593	0.929454	0.745635	1.20754	1.04106	0.470804	0.191255	0.0093625	1
ENSG00000038427	VCAN	versican [Source:HGNC Symbol;Acc:2464]	protein_coding	2.69598	1.04801	5.99012	8.22842	4.50941	12.3662	13.9006	18.96	5.26921	5.32685	1
ENSG00000048740	CELF2	CUGBP, Elav-like family member 2 [Source:HGNC Symbol;Acc:2550]	protein_coding	1.29156	2.32242	0.632048	0.903027	2.03646	2.66687	2.19132	1.68353	0.712267	1.66021	1
ENSG00000054356	PTPRN	protein tyrosine phosphatase, receptor type, N [Source:HGNC Symbol;Acc:9676]	protein_coding	0.177966	0.0320787	0.0135531	0.0205371	0.0520352	2.478	2.92221	4.08257	2.00498	0.949705	1
ENSG00000059728	MXD1	MAX dimerization protein 1 [Source:HGNC Symbol;Acc:6761]	protein_coding	1.07927	1.51141	1.00184	1.53826	2.22661	3.32164	1.49822	1.58032	3.0698	2.48399	1
ENSG00000064989	CALCRL	calcitonin receptor-like [Source:HGNC Symbol;Acc:16709]	protein_coding	0.224158	0.18909	0.159392	0.237489	0.111349	0.253852	0.146793	0.233331	0.276442	0.0398351	1
ENSG00000065911	MTHFD2	methylenetetrahydrofolate dehydrogenase (NADP+ dependent) 2, methenyltetrahydrofolate cyclohydrolase [Source:HGNC Symbol;Acc:7434]	protein_coding	18.4377	22.8248	23.6247	21.7756	6.09753	31.3085	14.3528	27.4692	44.5936	6.45283	1
ENSG00000067064	IDI1	isopentenyl-diphosphate delta isomerase 1 [Source:HGNC Symbol;Acc:5387]	protein_coding	10.9576	11.021	22.1272	17.0733	14.6473	23.2658	16.2428	19.0456	25.7093	11.5646	1
ENSG00000070669	ASNS	asparagine synthetase (glutamine-hydrolyzing) [Source:HGNC Symbol;Acc:753]	protein_coding	5.85706	13.1227	24.1381	18.5953	5.40156	23.6626	11.2407	26.0833	44.1104	4.21358	1
ENSG00000073150	PANX2	pannexin 2 [Source:HGNC Symbol;Acc:8600]	protein_coding	0.490766	0.636977	0.377096	0.350866	1.21305	0.938242	0.807562	0.909476	1.23636	0.419079	1
ENSG00000075643	MOCOS	molybdenum cofactor sulfurase [Source:HGNC Symbol;Acc:18234]	protein_coding	0.823576	1.42266	2.61154	2.76603	1.81002	3.16225	2.32111	1.85492	2.99455	1.44785	1
ENSG00000077264	PAK3	p21 protein (Cdc42/Rac)-activated kinase 3 [Source:HGNC Symbol;Acc:8592]	protein_coding	0.105888	0.090405	0.00989989	0.00819566	0.00270355	0.282544	0.198088	0.189769	0.0991182	0.0290195	1
ENSG00000077943	ITGA8	integrin, alpha 8 [Source:HGNC Symbol;Acc:6144]	protein_coding	0.13907	0.341583	0.482758	0.359966	0.674016	4.74554	6.37695	6.41174	16.6342	8.05361	1
ENSG00000078053	AMPH	amphiphysin [Source:HGNC Symbol;Acc:471]	protein_coding	1.02899	0.898274	1.00806	0.958522	0.340129	3.23456	3.14359	2.34069	0.598014	0.170456	1
ENSG00000087086	FTL	ferritin, light polypeptide [Source:HGNC Symbol;Acc:3999]	protein_coding	1494.33	2152.53	5578.82	4373.51	5263.39	4194.33	3372.56	3390.98	6512.28	2974.32	1
ENSG00000087842	PIR	pirin (iron-binding nuclear protein) [Source:HGNC Symbol;Acc:30048]	protein_coding	0.884186	1.79013	2.35948	2.32111	3.03715	3.93435	3.54186	3.61807	6.49014	0.940407	1
ENSG00000089692	LAG3	lymphocyte-activation gene 3 [Source:HGNC Symbol;Acc:6476]	protein_coding	0.25313	0.170507	0.185006	0.0946499	0.0570793	0.189692	0.232319	0.310674	0.285704	0.0473504	1
ENSG00000090006	LTBP4	latent transforming growth factor beta binding protein 4 [Source:HGNC Symbol;Acc:6717]	protein_coding	3.90014	6.53531	10.5396	9.89763	23.9987	49.542	35.2625	38.6093	71.5113	32.7643	1
ENSG00000091428	RAPGEF4	Rap guanine nucleotide exchange factor (GEF) 4 [Source:HGNC Symbol;Acc:16626]	protein_coding	0.243802	0.207169	0.0378251	0.103052	0.700184	0.788419	0.622689	0.5285	0.269975	0.342446	1
ENSG00000091490	SEL1L3	sel-1 suppressor of lin-12-like 3 (C. elegans) [Source:HGNC Symbol;Acc:29108]	protein_coding	2.90852	5.69698	3.75174	3.80503	1.07613	6.76403	6.86527	8.67247	8.17425	1.53902	1
ENSG00000091844	RGS17	regulator of G-protein signaling 17 [Source:HGNC Symbol;Acc:14088]	protein_coding	1.73215	0.860938	0.223821	0.228638	0.233152	6.76243	5.17425	4.1109	3.10896	2.16499	1
ENSG00000092421	SEMA6A	sema domain, transmembrane domain (TM), and cytoplasmic domain, (semaphorin) 6A [Source:HGNC Symbol;Acc:10738]	protein_coding	0.0881265	0.134295	1.7309	2.80803	1.58291	1.70388	2.78111	4.354	6.99019	4.53395	1
ENSG00000092621	PHGDH	phosphoglycerate dehydrogenase [Source:HGNC Symbol;Acc:8923]	protein_coding	15.3679	21.4335	27.6524	18.9146	6.36442	20.9543	15.9169	28.2929	37.0263	3.42867	1
ENSG00000095203	EPB41L4B	erythrocyte membrane protein band 4.1 like 4B [Source:HGNC Symbol;Acc:19818]	protein_coding	0.0912566	0.120969	0.02538	0.0233636	0.0305778	0.271154	0.237481	0.162233	0.0840682	0.0378736	1
ENSG00000099284	H2AFY2	H2A histone family, member Y2 [Source:HGNC Symbol;Acc:14453]	protein_coding	1.97648	2.06728	4.98166	3.6135	5.74074	8.25054	8.00319	7.82951	5.97543	3.12453	1
ENSG00000100889	PCK2	phosphoenolpyruvate carboxykinase 2 (mitochondrial) [Source:HGNC Symbol;Acc:8725]	protein_coding	6.90654	15.566	22.6359	16.9485	4.81868	12.0282	5.78718	11.9373	27.3633	2.37623	1
ENSG00000101255	TRIB3	tribbles homolog 3 (Drosophila) [Source:HGNC Symbol;Acc:16228]	protein_coding	8.08596	11.5945	18.0456	17.7511	5.29466	37.0874	7.57412	12.3165	57.3832	5.39822	1
ENSG00000101353	C20orf132	chromosome 20 open reading frame 132 [Source:HGNC Symbol;Acc:16125]	protein_coding	0.253334	0.316268	0.443741	0.421806	0.660784	0.451758	0.331345	0.442725	0.896734	0.460503	1
ENSG00000102172	SMS	spermine synthase [Source:HGNC Symbol;Acc:11123]	protein_coding	42.9963	21.503	13.1841	9.07076	9.94866	69.5886	69.1809	66.4664	53.9246	34.7042	1
ENSG00000102886	GDPD3	glycerophosphodiester phosphodiesterase domain containing 3 [Source:HGNC Symbol;Acc:28638]	protein_coding	0.969066	1.34079	0.733824	0.554897	0.439086	0.949053	1.04406	1.03573	1.39743	0.516475	1
ENSG00000103710	RASL12	RAS-like, family 12 [Source:HGNC Symbol;Acc:30289]	protein_coding	0.920817	1.94168	0.194138	0.178222	0.367004	1.64289	1.12863	0.44621	0.940177	0.148085	1
ENSG00000104213	PDGFRL	platelet-derived growth factor receptor-like [Source:HGNC Symbol;Acc:8805]	protein_coding	0.886207	1.87063	0.904749	0.988185	9.71245	9.59215	8.47418	7.33141	9.80768	3.47637	1
ENSG00000104321	TRPA1	transient receptor potential cation channel, subfamily A, member 1 [Source:HGNC Symbol;Acc:497]	protein_coding	0.319365	0.188028	0.0310063	0.0407523	0.14103	96.154	86.5845	51.6898	134.24	107.637	1
ENSG00000104332	SFRP1	secreted frizzled-related protein 1 [Source:HGNC Symbol;Acc:10776]	protein_coding	103.239	163.182	19.0674	30.092	80.9234	611.284	503.647	344.67	154.089	325.29	1
ENSG00000105281	SLC1A5	solute carrier family 1 (neutral amino acid transporter), member 5 [Source:HGNC Symbol;Acc:10943]	protein_coding	62.2638	53.8327	64.822	52.4578	25.3371	106.814	68.2903	94.9685	159.382	34.0013	1
ENSG00000105538	RASIP1	Ras interacting protein 1 [Source:HGNC Symbol;Acc:24716]	protein_coding	0.12424	0.14771	0.204502	0.119324	0.318966	0.397745	0.332169	0.210661	0.20424	0.0745541	1
ENSG00000105605	CACNG7	calcium channel, voltage-dependent, gamma subunit 7 [Source:HGNC Symbol;Acc:13626]	protein_coding	0.244995	0.228771	0.0180446	0.0107201	0.0390046	0.718165	0.673163	0.403663	0.185551	0.0289468	1
ENSG00000105855	ITGB8	integrin, beta 8 [Source:HGNC Symbol;Acc:6163]	protein_coding	0.130545	0.168921	0.293452	0.379596	0.478438	0.610349	0.316376	0.306366	0.439378	0.277345	1
ENSG00000108176	DNAJC12	DnaJ (Hsp40) homolog, subfamily C, member 12 [Source:HGNC Symbol;Acc:28908]	protein_coding	0.122541	0.0987583	0.0975068	0.175938	0.635226	0.640729	0.330449	0.227109	0.58814	0.0589942	1
ENSG00000111087	GLI1	GLI family zinc finger 1 [Source:HGNC Symbol;Acc:4317]	protein_coding	0.501583	0.244721	0.243102	0.17005	0.0814369	0.94075	0.571352	0.926004	0.718055	0.0867899	1
ENSG00000112414	GPR126	G protein-coupled receptor 126 [Source:HGNC Symbol;Acc:13841]	protein_coding	2.92911	2.2724	3.42381	4.60208	0.572142	3.43051	3.73492	4.51845	3.7281	1.64197	1
ENSG00000112936	C7	complement component 7 [Source:HGNC Symbol;Acc:1346]	protein_coding	0.028883	0.0426905	0.0214225	0.0226493	0.160994	1.15729	1.52265	0.950942	1.91572	0.892365	1
ENSG00000114854	TNNC1	troponin C type 1 (slow) [Source:HGNC Symbol;Acc:11943]	protein_coding	0.0781699	0.0846282	0.848062	0.403061	0.381287	0.767755	0.851969	0.651202	0.968356	0.219062	1
ENSG00000115604	IL18R1	interleukin 18 receptor 1 [Source:HGNC Symbol;Acc:5988]	protein_coding	0.0308545	0.139989	0.0389256	0.0335206	0.0179822	0.691405	0.589025	0.619017	1.67584	0.350285	1
ENSG00000115902	SLC1A4	solute carrier family 1 (glutamate/neutral amino acid transporter), member 4 [Source:HGNC Symbol;Acc:10942]	protein_coding	1.77076	2.56702	3.79228	3.48016	1.47471	4.56327	2.02602	3.76853	8.69902	2.27688	1
ENSG00000115963	RND3	Rho family GTPase 3 [Source:HGNC Symbol;Acc:671]	protein_coding	142.362	177.311	155.589	165.899	286.528	233.49	210.898	190.709	370.283	146.917	1
ENSG00000117594	HSD11B1	hydroxysteroid (11-beta) dehydrogenase 1 [Source:HGNC Symbol;Acc:5208]	protein_coding	0.336523	0.267872	0.0294517	0.0663727	0.348673	2.8281	1.74936	0.8441	0.858329	0.687933	1
ENSG00000118523	CTGF	connective tissue growth factor [Source:HGNC Symbol;Acc:2500]	protein_coding	216.909	280.089	415.259	554.592	863.261	978.979	729.794	528.339	442.484	481.264	1
ENSG00000118526	TCF21	transcription factor 21 [Source:HGNC Symbol;Acc:11632]	protein_coding	0.170704	0.157574	0.00444775	0.00607113	0	22.2128	18.2132	7.89574	16.3952	9.84547	1
ENSG00000118777	ABCG2	ATP-binding cassette, sub-family G (WHITE), member 2 [Source:HGNC Symbol;Acc:74]	protein_coding	0.685173	0.358544	0.0910063	0.111869	0.263697	1.47448	1.14189	1.31549	2.26793	0.922354	1
ENSG00000120645	IQSEC3	IQ motif and Sec7 domain 3 [Source:HGNC Symbol;Acc:29193]	protein_coding	0.00139522	0.00141227	0.00263358	0.00244829	0.0896971	0.269379	0.205869	0.0769667	0.0365224	0.0736109	1
ENSG00000121743	GJA3	gap junction protein, alpha 3, 46kDa [Source:HGNC Symbol;Acc:4277]	protein_coding	0.263502	0.235462	0.0144437	0.0169609	0.102378	1.69411	1.52233	0.757644	0.523784	0.8941	1
ENSG00000122367	LDB3	LIM domain binding 3 [Source:HGNC Symbol;Acc:15710]	protein_coding	0.137182	0.256223	0.0831093	0.0991021	0.0813938	0.354228	0.464583	0.422907	0.195188	0.167138	1
ENSG00000123689	G0S2	G0/G1switch 2 [Source:HGNC Symbol;Acc:30229]	protein_coding	1.23391	0.506299	0.519022	0.25613	0.179666	4.28907	3.22377	3.08358	0.70303	0.152048	1
ENSG00000124920	C11orf9	chromosome 11 open reading frame 9 [Source:HGNC Symbol;Acc:1181]	protein_coding	0.235025	0.12132	0.0432872	0.0476208	0.0382294	0.718361	0.705665	0.94733	0.524704	0.144622	1
ENSG00000125089	SH3TC1	SH3 domain and tetratricopeptide repeats 1 [Source:HGNC Symbol;Acc:26009]	protein_coding	0.136827	0.0810281	0.0283906	0.0231359	0.0406772	0.318666	0.191651	0.170682	0.206817	0.0500176	1
ENSG00000125384	PTGER2	prostaglandin E receptor 2 (subtype EP2), 53kDa [Source:HGNC Symbol;Acc:9594]	protein_coding	2.05916	0.649245	0.114703	0.0476857	0.0629158	22.8586	21.1375	22.2456	28.0179	9.39606	1
ENSG00000126016	AMOT	angiomotin [Source:HGNC Symbol;Acc:17810]	protein_coding	0.469096	0.288015	0.235359	0.293777	0.116864	1.75793	1.59414	1.21635	0.322769	0.369495	1
ENSG00000127951	FGL2	fibrinogen-like 2 [Source:HGNC Symbol;Acc:3696]	protein_coding	0.0253233	0.0568036	0.0447916	0.0631253	0.226833	5.62312	3.07168	1.96115	3.60986	0.577858	1
ENSG00000128045	RASL11B	RAS-like, family 11, member B [Source:HGNC Symbol;Acc:23804]	protein_coding	0.313774	0.252831	0.0591065	0.0415745	0.0315671	0.194845	0.315964	0.814127	0.654836	0.0418214	1
ENSG00000128228	SDF2L1	stromal cell-derived factor 2-like 1 [Source:HGNC Symbol;Acc:10676]	protein_coding	23.0337	12.7836	12.3242	6.07681	10.3723	54.1487	20.1046	19.4714	85.3264	13.6756	1
ENSG00000128342	LIF	leukemia inhibitory factor [Source:HGNC Symbol;Acc:6596]	protein_coding	36.3493	11.2207	27.3188	32.9264	5.55313	173.332	79.0841	35.1501	45.284	80.4851	1
ENSG00000128590	DNAJB9	DnaJ (Hsp40) homolog, subfamily B, member 9 [Source:HGNC Symbol;Acc:6968]	protein_coding	5.35543	9.60283	11.1005	10.9669	21.0779	25.1792	6.8262	7.26045	46.5659	12.9648	1
ENSG00000128602	SMO	smoothened, frizzled family receptor [Source:HGNC Symbol;Acc:11119]	protein_coding	3.04188	2.76812	1.23523	1.41581	3.4929	8.33316	7.32561	7.45897	7.55684	3.79377	1
ENSG00000128965	CHAC1	ChaC, cation transport regulator homolog 1 (E. coli) [Source:HGNC Symbol;Acc:28680]	protein_coding	10.9698	16.1246	10.4859	15.9171	6.9161	46.9108	34.845	23.7509	34.2526	21.0651	1
ENSG00000129757	CDKN1C	cyclin-dependent kinase inhibitor 1C (p57, Kip2) [Source:HGNC Symbol;Acc:1786]	protein_coding	0.663849	1.14123	2.77701	2.25048	2.27962	2.74811	2.15274	2.3196	4.14164	1.25359	1
ENSG00000129910	CDH15	cadherin 15, type 1, M-cadherin (myotubule) [Source:HGNC Symbol;Acc:1754]	protein_coding	0.226771	0.166479	0.112206	0.103123	0.0855966	0.552466	0.160832	0.144334	1.44219	0.0848187	1
ENSG00000129951	hsa-mir-3187	hsa-mir-3187 [Source:miRBase;Acc:MI0014231]	protein_coding	0.0852256	0.118489	0.192078	0.179975	1.07165	1.4069	1.10346	0.964389	0.631353	0.631408	1
ENSG00000130164	LDLR	low density lipoprotein receptor [Source:HGNC Symbol;Acc:6547]	protein_coding	17.8958	24.1663	30.8431	36.0045	13.1031	40.5141	38.0049	44.0977	44.6751	14.962	1
ENSG00000130303	BST2	bone marrow stromal cell antigen 2 [Source:HGNC Symbol;Acc:1119]	protein_coding	0.300565	0.448978	0.0689031	0.0488192	0.0576466	0.252416	0.230832	0.59844	0.893104	0.347692	1
ENSG00000130513	GDF15	growth differentiation factor 15 [Source:HGNC Symbol;Acc:30142]	protein_coding	28.3146	40.9726	40.6899	40.66	58.3091	105.251	46.5887	29.8502	141.038	34.6334	1
ENSG00000130766	SESN2	sestrin 2 [Source:HGNC Symbol;Acc:20746]	protein_coding	7.97913	13.9428	12.2795	22.8505	8.22087	26.4101	7.44385	9.90379	26.7059	11.0735	1
ENSG00000130775	THEMIS2	thymocyte selection associated family member 2 [Source:HGNC Symbol;Acc:16839]	protein_coding	0.760531	0.504318	0.569876	0.440333	0.18755	2.10144	1.62883	1.12162	1.64622	0.709655	1
ENSG00000132031	MATN3	matrilin 3 [Source:HGNC Symbol;Acc:6909]	protein_coding	0.729567	1.07203	1.43511	1.41295	2.05086	2.2506	2.21428	2.35349	2.82715	1.00499	1
ENSG00000132329	RAMP1	receptor (G protein-coupled) activity modifying protein 1 [Source:HGNC Symbol;Acc:9843]	protein_coding	0.59739	1.05326	1.03557	0.74377	1.35787	18.9569	17.2215	12.3013	9.79544	5.96391	1
ENSG00000132481	TRIM47	tripartite motif containing 47 [Source:HGNC Symbol;Acc:19020]	protein_coding	0.678171	1.64664	1.56676	1.2787	2.39072	4.53042	4.36035	5.80504	8.22681	2.54044	1
ENSG00000132639	SNAP25	synaptosomal-associated protein, 25kDa [Source:HGNC Symbol;Acc:11132]	protein_coding	1.82516	0.807506	0.19896	0.232387	3.51885	3.157	2.56095	1.58458	2.69067	1.45235	1
ENSG00000133110	POSTN	periostin, osteoblast specific factor [Source:HGNC Symbol;Acc:16953]	protein_coding	1.37791	1.03191	39.0482	29.8497	1.1126	26.2193	19.61	29.4995	14.5442	1.78338	1
ENSG00000134107	BHLHE40	basic helix-loop-helix family, member e40 [Source:HGNC Symbol;Acc:1046]	protein_coding	22.4902	7.56231	36.1399	29.3103	8.28949	37.2328	19.8688	16.2054	22.7289	16.7427	1
ENSG00000134871	COL4A2	collagen, type IV, alpha 2 [Source:HGNC Symbol;Acc:2203]	protein_coding	60.7602	62.8959	33.9608	37.1666	16.5678	112.649	173.49	209.331	179.721	76.0526	1
ENSG00000134917	ADAMTS8	ADAM metallopeptidase with thrombospondin type 1 motif, 8 [Source:HGNC Symbol;Acc:224]	protein_coding	0.358581	1.40612	0.0241735	0.0151165	0.125639	8.02845	8.32836	2.48144	6.6201	7.12235	1
ENSG00000135069	PSAT1	phosphoserine aminotransferase 1 [Source:HGNC Symbol;Acc:19129]	protein_coding	19.2432	50.0992	98.094	82.5803	20.4847	60.2294	28.9746	74.6992	127.096	7.54568	1
ENSG00000135750	KCNK1	potassium channel, subfamily K, member 1 [Source:HGNC Symbol;Acc:6272]	protein_coding	0.224748	0.221324	0.371116	0.298473	0.642429	0.864121	0.536549	0.461152	0.481811	0.33593	1
ENSG00000135842	FAM129A	family with sequence similarity 129, member A [Source:HGNC Symbol;Acc:16784]	protein_coding	4.34356	5.891	6.66944	8.00541	2.90552	16.98	10.6843	12.5648	24.728	3.46625	1
ENSG00000136014	USP44	ubiquitin specific peptidase 44 [Source:HGNC Symbol;Acc:20064]	protein_coding	2.0563	4.19302	1.98562	2.15437	2.38435	5.5256	5.8916	5.80079	4.6478	2.66556	1
ENSG00000136490	LIMD2	LIM domain containing 2 [Source:HGNC Symbol;Acc:28142]	protein_coding	1.47991	1.12816	1.56927	0.965006	0.397514	4.94204	4.61836	6.3789	6.07916	2.42096	1
ENSG00000136943	CTSL2	cathepsin L2 [Source:HGNC Symbol;Acc:2538]	protein_coding	0.359415	0.0955557	0.101821	0.0805684	0.266324	0.676855	0.557641	0.604425	0.320929	0.186926	1
ENSG00000137331	IER3	immediate early response 3 [Source:HGNC Symbol;Acc:5392]	protein_coding	111.375	47.7693	175.293	146.637	63.3468	186.705	96.6959	76.7537	116.089	87.3051	1
ENSG00000137563	GGH	gamma-glutamyl hydrolase (conjugase, folylpolygammaglutamyl hydrolase) [Source:HGNC Symbol;Acc:4248]	protein_coding	12.5862	4.86179	4.43986	4.37447	10.4206	14.9051	15.8723	15.8026	13.0123	3.74868	1
ENSG00000137752	CASP1	caspase 1, apoptosis-related cysteine peptidase [Source:HGNC Symbol;Acc:1499]	protein_coding	5.38032	4.37188	3.07777	2.58719	2.39051	12.1302	9.67464	10.6751	19.4627	8.1178	1
ENSG00000138316	ADAMTS14	ADAM metallopeptidase with thrombospondin type 1 motif, 14 [Source:HGNC Symbol;Acc:14899]	protein_coding	1.92213	4.59831	4.3456	5.76936	4.31862	5.15583	5.3808	4.07728	4.9162	1.31806	1
ENSG00000139269	INHBE	inhibin, beta E [Source:HGNC Symbol;Acc:24029]	protein_coding	0.182416	0.685523	0.803025	0.612421	0.399202	1.26045	0.368815	1.18565	2.05673	0.0580596	1
ENSG00000139289	PHLDA1	pleckstrin homology-like domain, family A, member 1 [Source:HGNC Symbol;Acc:8933]	protein_coding	13.7492	6.04666	7.9549	7.13009	4.98227	65.3659	38.5865	30.9113	41.9501	31.6284	1
ENSG00000139910	NOVA1	neuro-oncological ventral antigen 1 [Source:HGNC Symbol;Acc:7886]	protein_coding	0.161359	0.128829	0.0923137	0.0816329	0.250281	0.483808	0.292532	0.143505	0.0656774	0.0580431	1
ENSG00000140105	WARS	tryptophanyl-tRNA synthetase [Source:HGNC Symbol;Acc:12729]	protein_coding	22.4275	34.4421	33.1397	30.8431	14.3537	45.2679	33.8974	53.5656	97.5795	27.7325	1
ENSG00000140332	TLE3	transducin-like enhancer of split 3 (E(sp1) homolog, Drosophila) [Source:HGNC Symbol;Acc:11839]	protein_coding	0.83286	0.557795	0.711422	0.646066	0.347873	1.84063	1.70156	1.68737	1.2689	0.826422	1
ENSG00000140368	PSTPIP1	proline-serine-threonine phosphatase interacting protein 1 [Source:HGNC Symbol;Acc:9580]	protein_coding	0.0369235	0.0222354	0.107778	0.0935795	0.0774296	0.126479	0.0908549	0.0839228	0.0561435	0.0348063	1
ENSG00000140961	OSGIN1	oxidative stress induced growth inhibitor 1 [Source:HGNC Symbol;Acc:30093]	protein_coding	1.16679	1.31143	1.83546	1.75398	2.41418	4.15578	3.75252	3.99355	9.05119	1.6954	1
ENSG00000141441	FAM59A	family with sequence similarity 59, member A [Source:HGNC Symbol;Acc:26136]	protein_coding	0.344412	0.306269	0.0301095	0.0299928	0.434521	0.464226	0.342016	0.369112	0.548082	0.230432	1
ENSG00000144339	TMEFF2	transmembrane protein with EGF-like and two follistatin-like domains 2 [Source:HGNC Symbol;Acc:11867]	protein_coding	0.0176696	0.0104176	0.0124353	0.0187898	0.0745044	0.49379	0.44974	0.719676	0.520244	0.0893511	1
ENSG00000144488	ESPNL	espin-like [Source:HGNC Symbol;Acc:27937]	protein_coding	0.224458	0.238397	0.0242841	0.0434623	0.0558693	0.774756	0.631018	0.586029	0.525263	0.211073	1
ENSG00000145050	MANF	mesencephalic astrocyte-derived neurotrophic factor [Source:HGNC Symbol;Acc:15461]	protein_coding	36.6331	24.1704	22.7971	13.5949	17.9813	74.9425	31.1235	31.893	151.372	16.9252	1
ENSG00000145242	EPHA5	EPH receptor A5 [Source:HGNC Symbol;Acc:3389]	protein_coding	0.00391128	0.00702883	0.00681573	0.00501816	0.0274326	0.228356	0.225839	0.155406	0.0427845	0.00965188	1
ENSG00000146267	FAXC	failed axon connections homolog (Drosophila) [Source:HGNC Symbol;Acc:20742]	protein_coding	0.884927	0.629525	0.445864	0.332453	0.367869	0.750356	0.734766	1.20284	1.03959	0.371876	1
ENSG00000146555	SDK1	sidekick cell adhesion molecule 1 [Source:HGNC Symbol;Acc:19307]	protein_coding	0.044779	0.0804303	0.0943639	0.139716	0.338183	1.15136	0.872191	0.607862	0.49102	1.01373	1
ENSG00000147180	ZNF711	zinc finger protein 711 [Source:HGNC Symbol;Acc:13128]	protein_coding	0.166752	0.0753509	0.0100227	0.00632909	0.0348052	0.994012	0.906746	1.02529	0.562175	0.0226817	1
ENSG00000147403	RPL10	ribosomal protein L10 [Source:HGNC Symbol;Acc:10298]	protein_coding	108.431	108.375	121.979	91.7212	44.6433	123.833	102.973	106.258	147.661	63.5624	1
ENSG00000147509	RGS20	regulator of G-protein signaling 20 [Source:HGNC Symbol;Acc:14600]	protein_coding	1.02198	0.458779	0.376754	0.424442	0.29102	6.13039	5.72672	6.54411	5.81155	2.88121	1
ENSG00000149257	SERPINH1	serpin peptidase inhibitor, clade H (heat shock protein 47), member 1, (collagen binding protein 1) [Source:HGNC Symbol;Acc:1546]	protein_coding	111.969	106.89	98.4451	87.8986	40.088	109.399	105.769	146.375	122.173	27.688	1
ENSG00000150540	HNMT	histamine N-methyltransferase [Source:HGNC Symbol;Acc:5028]	protein_coding	1.13923	1.93776	1.85906	1.98944	2.70864	3.02638	2.6954	3.04836	4.60986	2.14786	1
ENSG00000151012	SLC7A11	solute carrier family 7 (anionic amino acid transporter light chain, xc- system), member 11 [Source:HGNC Symbol;Acc:11059]	protein_coding	2.60588	5.26706	13.1396	16.3071	11.289	29.6855	21.1933	27.2909	52.6466	10.5587	1
ENSG00000151617	EDNRA	endothelin receptor type A [Source:HGNC Symbol;Acc:3179]	protein_coding	0.762379	0.87606	5.44014	6.73844	2.94954	5.21627	5.11598	4.50071	7.34832	2.14612	1
ENSG00000152049	KCNE4	potassium voltage-gated channel, Isk-related family, member 4 [Source:HGNC Symbol;Acc:6244]	protein_coding	1.02448	1.29506	2.59819	3.54068	6.12744	8.37352	3.69789	2.62502	6.29846	4.68343	1
ENSG00000152804	HHEX	hematopoietically expressed homeobox [Source:HGNC Symbol;Acc:4901]	protein_coding	3.78771	3.08694	1.18092	1.16639	1.20422	3.82688	4.10388	5.91669	7.20823	2.20776	1
ENSG00000153132	CLGN	calmegin [Source:HGNC Symbol;Acc:2060]	protein_coding	0.146786	0.32601	0.373683	0.324758	0.481711	2.90446	2.55993	2.343	5.29198	1.65801	1
ENSG00000153714	LURAP1L	leucine rich adaptor protein 1-like [Source:HGNC Symbol;Acc:31452]	protein_coding	1.28695	3.49689	8.71347	12.0158	10.5971	14.5706	5.93671	4.80504	21.2383	9.00133	1
ENSG00000153879	CEBPG	CCAAT/enhancer binding protein (C/EBP), gamma [Source:HGNC Symbol;Acc:1837]	protein_coding	6.03343	8.15395	10.0529	10.9502	5.07191	13.3325	6.13075	9.18115	18.1126	3.99671	1
ENSG00000153885	KCTD15	potassium channel tetramerisation domain containing 15 [Source:HGNC Symbol;Acc:23297]	protein_coding	2.91088	3.09465	6.31316	5.29512	1.82284	4.37638	3.29701	5.41192	5.60687	0.795364	1
ENSG00000154133	ROBO4	roundabout, axon guidance receptor, homolog 4 (Drosophila) [Source:HGNC Symbol;Acc:17985]	protein_coding	0.177861	0.109042	0.0208955	0.0202774	0.0340346	0.432285	0.431586	0.476356	0.222743	0.142691	1
ENSG00000154277	UCHL1	ubiquitin carboxyl-terminal esterase L1 (ubiquitin thiolesterase) [Source:HGNC Symbol;Acc:12513]	protein_coding	133.302	163.338	103.079	78.0201	165.24	244.446	234.383	215.643	298.814	109.612	1
ENSG00000154545	MAGED4	melanoma antigen family D, 4 [Source:HGNC Symbol;Acc:23793]	protein_coding	10.6078	8.13596	7.31324	6.18415	4.31942	20.9887	20.224	20.255	21.7486	10.8445	1
ENSG00000154654	NCAM2	neural cell adhesion molecule 2 [Source:HGNC Symbol;Acc:7657]	protein_coding	0.0272593	0.0324242	0.0463469	0.0736464	0.292801	0.626117	0.626954	0.530635	0.381363	0.234493	1
ENSG00000156510	HKDC1	hexokinase domain containing 1 [Source:HGNC Symbol;Acc:23302]	protein_coding	0.0132478	0.0239923	0.046643	0.0711237	0.285823	0.43977	0.33481	0.273221	1.01466	0.180235	1
ENSG00000157150	TIMP4	TIMP metallopeptidase inhibitor 4 [Source:HGNC Symbol;Acc:11823]	protein_coding	0.967135	1.18983	0.537106	0.335894	0.441019	2.04723	1.34749	1.32887	2.02082	0.564686	1
ENSG00000157368	IL34	interleukin 34 [Source:HGNC Symbol;Acc:28529]	protein_coding	0.127428	0.99313	0.406837	0.407742	0.673153	0.557845	0.384644	0.438869	1.42409	0.411048	1
ENSG00000157399	ARSE	arylsulfatase E (chondrodysplasia punctata 1) [Source:HGNC Symbol;Acc:719]	protein_coding	0.924338	0.626452	0.230727	0.295705	0.729662	1.2248	1.09796	1.15099	1.37084	0.514157	1
ENSG00000158352	SHROOM4	shroom family member 4 [Source:HGNC Symbol;Acc:29215]	protein_coding	0.100864	0.0975266	0.0291363	0.0554779	0.0662425	0.207172	0.237634	0.178315	0.0817957	0.0930756	1
ENSG00000160179	ABCG1	ATP-binding cassette, sub-family G (WHITE), member 1 [Source:HGNC Symbol;Acc:73]	protein_coding	0.0621921	0.0792278	0.0449738	0.0648104	0.514425	1.2275	0.868777	0.140754	0.75235	0.60216	1
ENSG00000160207	HSF2BP	heat shock transcription factor 2 binding protein [Source:HGNC Symbol;Acc:5226]	protein_coding	0.421812	0.568345	0.573099	0.57244	0.858687	0.683763	0.485917	0.56446	1.14296	0.730481	1
ENSG00000160781	PAQR6	progestin and adipoQ receptor family member VI [Source:HGNC Symbol;Acc:30132]	protein_coding	0.888928	0.598843	0.738347	0.660955	0.360007	1.05952	0.816246	0.678697	1.02628	0.521451	1
ENSG00000160867	FGFR4	fibroblast growth factor receptor 4 [Source:HGNC Symbol;Acc:3691]	protein_coding	0.219781	0.133061	0.056718	0.0711264	0.0428613	3.29269	2.7285	0.590914	1.22633	0.352122	1
ENSG00000160951	PTGER1	prostaglandin E receptor 1 (subtype EP1), 42kDa [Source:HGNC Symbol;Acc:9593]	protein_coding	0.524182	0.18365	0.847623	0.41483	0.298572	0.711081	0.624936	1.39839	1.21995	0.737005	1
ENSG00000161011	SQSTM1	sequestosome 1 [Source:HGNC Symbol;Acc:11280]	protein_coding	24.1059	44.1862	42.2646	44.5337	61.451	61.3683	50.0759	40.7946	81.9138	46.7209	1
ENSG00000161544	CYGB	cytoglobin [Source:HGNC Symbol;Acc:16505]	protein_coding	0.913161	1.64588	1.39884	1.64252	7.64612	18.0198	11.7794	9.22984	21.9397	17.3766	1
ENSG00000161896	IP6K3	inositol hexakisphosphate kinase 3 [Source:HGNC Symbol;Acc:17269]	protein_coding	0.30054	0.568287	0.358023	0.421857	0.799845	1.05779	1.00833	0.558949	0.856182	0.262354	1
ENSG00000162407	PPAP2B	phosphatidic acid phosphatase type 2B [Source:HGNC Symbol;Acc:9229]	protein_coding	9.55864	13.9152	17.0821	21.3073	19.9796	50.1716	46.2782	38.2668	34.5572	21.7315	1
ENSG00000162551	ALPL	alkaline phosphatase, liver/bone/kidney [Source:HGNC Symbol;Acc:438]	protein_coding	0.709281	3.88859	1.83761	2.42243	3.60902	7.95962	8.70118	2.31164	4.54842	5.31283	1
ENSG00000162692	VCAM1	vascular cell adhesion molecule 1 [Source:HGNC Symbol;Acc:12663]	protein_coding	0.0292432	0.201888	1.41784	1.15637	1.72867	3.3313	3.62729	3.12713	4.94489	1.10854	1
ENSG00000162772	ATF3	activating transcription factor 3 [Source:HGNC Symbol;Acc:785]	protein_coding	9.71468	4.24613	17.1698	20.3602	2.38452	30.3371	10.5422	4.15525	6.64554	13.335	1
ENSG00000162944	RFTN2	raftlin family member 2 [Source:HGNC Symbol;Acc:26402]	protein_coding	0.0692556	0.17706	0.162351	0.246531	0.94799	1.94154	1.48431	1.54337	2.73816	1.24469	1
ENSG00000163703	CRELD1	cysteine-rich with EGF-like domains 1 [Source:HGNC Symbol;Acc:14630]	protein_coding	6.0383	8.47303	7.05548	6.78243	13.8172	13.4656	8.03522	7.12127	29.066	11.6944	1
ENSG00000163734	CXCL3	chemokine (C-X-C motif) ligand 3 [Source:HGNC Symbol;Acc:4604]	protein_coding	0.533436	0.178295	0.106711	0.203564	0.0975057	0.969988	0.0936644	0.0900475	0.345633	0.0464511	1
ENSG00000163814	CDCP1	CUB domain containing protein 1 [Source:HGNC Symbol;Acc:24357]	protein_coding	4.34446	3.25659	0.157587	0.15742	0.390236	23.1625	22.8051	10.4475	8.33478	14.4841	1
ENSG00000164112	TMEM155	transmembrane protein 155 [Source:HGNC Symbol;Acc:26418]	protein_coding	0.281999	0.105714	0.12927	0.0691819	0.138437	1.07987	0.970291	0.732403	0.714724	0.0237229	1
ENSG00000164683	HEY1	hairy/enhancer-of-split related with YRPW motif 1 [Source:HGNC Symbol;Acc:4880]	protein_coding	0.334259	0.0727788	0.0392024	0.056327	0.0444419	0.900293	0.159585	0.194353	0.300579	0.131354	1
ENSG00000164929	BAALC	brain and acute leukemia, cytoplasmic [Source:HGNC Symbol;Acc:14333]	protein_coding	0.496403	0.50541	2.03844	1.79279	0.308946	8.16419	6.87976	7.53087	4.30173	3.93999	1
ENSG00000165323	FAT3	FAT tumor suppressor homolog 3 (Drosophila) [Source:HGNC Symbol;Acc:23112]	protein_coding	0.0227617	0.0336003	0.0310253	0.036034	0.0577109	0.288933	0.418818	0.797078	0.403226	0.194063	1
ENSG00000165449	SLC16A9	solute carrier family 16, member 9 (monocarboxylic acid transporter 9) [Source:HGNC Symbol;Acc:23520]	protein_coding	0.00439228	0.013166	0.00227823	0.00226112	0.0629405	0.116047	0.0583624	0.066081	0.0641576	0.00918363	1
ENSG00000165685	TMEM52B	transmembrane protein 52B [Source:HGNC Symbol;Acc:26438]	protein_coding	0.308588	0.365298	0.222449	0.241531	0.0789157	0.707677	0.815474	0.653632	0.998383	0.405654	1
ENSG00000165868	HSPA12A	heat shock 70kDa protein 12A [Source:HGNC Symbol;Acc:19022]	protein_coding	1.50237	1.76641	3.33649	3.48613	3.83513	4.06988	3.90911	3.68811	2.19804	1.77882	1
ENSG00000165997	ARL5B	ADP-ribosylation factor-like 5B [Source:HGNC Symbol;Acc:23052]	protein_coding	5.32926	4.23384	5.05558	7.29749	2.7846	9.45183	5.03414	5.49744	6.27541	3.85059	1
ENSG00000166831	RBPMS2	RNA binding protein with multiple splicing 2 [Source:HGNC Symbol;Acc:19098]	protein_coding	0.160896	0.110036	0.351601	0.328308	0.552984	1.32288	1.33894	1.28652	1.6229	0.714496	1
ENSG00000167771	RCOR2	REST corepressor 2 [Source:HGNC Symbol;Acc:27455]	protein_coding	1.151	0.694384	0.245367	0.191611	0.280406	2.1568	1.68042	2.4889	1.94337	0.714831	1
ENSG00000167889	MGAT5B	mannosyl (alpha-1,6-)-glycoprotein beta-1,6-N-acetyl-glucosaminyltransferase, isozyme B [Source:HGNC Symbol;Acc:24140]	protein_coding	0.0441932	0.0213045	0.104983	0.0745043	0.0747558	0.497508	0.570435	0.838893	0.362068	0.164153	1
ENSG00000167912	RP11-25K19.1		lincRNA	0.652551	0.592317	3.4108	2.82893	1.79334	2.08207	1.65714	1.95157	2.22173	0.248661	1
ENSG00000168003	SLC3A2	solute carrier family 3 (activators of dibasic and neutral amino acid transport), member 2 [Source:HGNC Symbol;Acc:11026]	protein_coding	19.2976	24.2528	71.5778	54.8069	19.0205	50.2291	28.8864	33.6081	130.219	13.2678	1
ENSG00000168028	RPSA	ribosomal protein SA [Source:HGNC Symbol;Acc:6502]	protein_coding	22.9637	19.2101	18.7096	13.5489	6.48257	28.1445	27.2184	26.3217	25.9296	12.2115	1
ENSG00000168077	SCARA3	scavenger receptor class A, member 3 [Source:HGNC Symbol;Acc:19000]	protein_coding	21.8396	9.91727	2.80929	2.09429	0.537976	48.8817	50.7186	62.624	29.3666	29.1274	1
ENSG00000168209	DDIT4	DNA-damage-inducible transcript 4 [Source:HGNC Symbol;Acc:24944]	protein_coding	4.17407	12.401	8.32068	9.83067	13.3927	17.237	7.14322	8.45088	60.2758	5.16638	1
ENSG00000168685	IL7R	interleukin 7 receptor [Source:HGNC Symbol;Acc:6024]	protein_coding	16.0515	6.26057	5.28343	3.7178	3.55547	23.1872	31.682	37.9857	16.7765	23.2042	1
ENSG00000169174	PCSK9	proprotein convertase subtilisin/kexin type 9 [Source:HGNC Symbol;Acc:20001]	protein_coding	0.00584146	0.0338571	0.166032	0.114774	0.11965	0.1797	0.147544	0.271799	0.085487	0.00584774	1
ENSG00000169429	IL8	interleukin 8 [Source:HGNC Symbol;Acc:6025]	protein_coding	1.10611	0.160865	0.433218	0.450862	0.2638	7.55142	0.621775	0.41447	0.566519	0.415335	1
ENSG00000169710	FASN	fatty acid synthase [Source:HGNC Symbol;Acc:3594]	protein_coding	24.5935	21.2602	15.1579	14.6976	11.4686	40.302	41.6882	43.4162	41.1957	15.4124	1
ENSG00000169760	NLGN1	neuroligin 1 [Source:HGNC Symbol;Acc:14291]	protein_coding	0.179966	0.514725	0.820902	0.935243	0.288113	0.63243	0.751476	1.59682	1.81663	0.827939	1
ENSG00000169851	PCDH7	protocadherin 7 [Source:HGNC Symbol;Acc:8659]	protein_coding	0.15497	0.169767	3.97384	5.65618	3.40971	2.70155	4.83464	9.8716	4.3297	3.34659	1
ENSG00000169933	FRMPD4	FERM and PDZ domain containing 4 [Source:HGNC Symbol;Acc:29007]	protein_coding	0.229642	0.282393	0.093443	0.135957	0.404412	1.04908	1.2936	0.904329	0.6777	0.164292	1
ENSG00000169946	ZFPM2	zinc finger protein, multitype 2 [Source:HGNC Symbol;Acc:16700]	protein_coding	2.52016	3.51823	0.123674	0.105888	0.193508	6.86747	7.37281	7.56401	5.12461	3.31502	1
ENSG00000170365	SMAD1	SMAD family member 1 [Source:HGNC Symbol;Acc:6767]	protein_coding	1.12273	1.16375	1.42246	1.70366	0.692957	2.34455	1.93727	1.45453	1.37216	0.944963	1
ENSG00000171208	NETO2	neuropilin (NRP) and tolloid (TLL)-like 2 [Source:HGNC Symbol;Acc:14644]	protein_coding	1.84426	0.787853	0.361989	0.318577	0.320838	3.60779	4.08472	3.66822	1.35139	1.15101	1
ENSG00000171388	APLN	apelin [Source:HGNC Symbol;Acc:16665]	protein_coding	0.400797	0.161896	0.0635793	0.0640713	0.642977	0.843684	1.18252	0.805418	0.325177	0.311989	1
ENSG00000171724	VAT1L	vesicle amine transport protein 1 homolog (T. californica)-like [Source:HGNC Symbol;Acc:29315]	protein_coding	2.31511	1.50408	0.192559	0.11857	0.0380349	27.4594	24.3197	22.2814	13.1105	30.3109	1
ENSG00000171860	C3AR1	complement component 3a receptor 1 [Source:HGNC Symbol;Acc:1319]	protein_coding	0.146659	0.0484546	0.0218076	0.00410822	0.0150614	0.265281	0.21296	0.170855	0.123624	0.0390567	1
ENSG00000171877	FRMD5	FERM domain containing 5 [Source:HGNC Symbol;Acc:28214]	protein_coding	0.36123	0.44705	0.156315	0.216151	0.26714	1.42743	1.33473	0.86326	0.518009	0.566206	1
ENSG00000172201	ID4	inhibitor of DNA binding 4, dominant negative helix-loop-helix protein [Source:HGNC Symbol;Acc:5363]	protein_coding	1.62881	0.164177	1.46481	1.14482	0.212757	4.96449	1.38489	0.721925	0.607435	0.204069	1
ENSG00000172349	IL16	interleukin 16 [Source:HGNC Symbol;Acc:5980]	protein_coding	0.0203991	0.0516939	0.0693073	0.0842856	0.117547	1.58588	1.09007	1.09855	2.33277	0.395701	1
ENSG00000173320	STOX2	storkhead box 2 [Source:HGNC Symbol;Acc:25450]	protein_coding	0.0419706	0.128071	0.0672442	0.104191	0.195966	0.584591	0.412784	0.330391	0.676708	0.34405	1
ENSG00000173334	TRIB1	tribbles homolog 1 (Drosophila) [Source:HGNC Symbol;Acc:16891]	protein_coding	17.24	4.02464	13.7976	13.2007	1.89464	24.0177	11.7715	6.83084	8.18156	18.0404	1
ENSG00000173894	CBX2	chromobox homolog 2 [Source:HGNC Symbol;Acc:1552]	protein_coding	0.300349	0.101816	0.112612	0.0785525	0.0262897	0.688517	0.993822	1.22003	0.712695	0.189815	1
ENSG00000174444	RPL4	ribosomal protein L4 [Source:HGNC Symbol;Acc:10353]	protein_coding	194.732	190.939	195.716	142.031	79.1654	202.301	178.809	181.635	211.027	104.97	1
ENSG00000174599	TRAM1L1	translocation associated membrane protein 1-like 1 [Source:HGNC Symbol;Acc:28371]	protein_coding	0.421247	0.437408	1.2104	1.03432	1.1187	2.12098	2.216	1.93344	1.95122	0.89104	1
ENSG00000176046	NUPR1	nuclear protein, transcriptional regulator, 1 [Source:HGNC Symbol;Acc:29990]	protein_coding	18.1021	58.7917	172.862	108.989	73.9768	71.5896	42.0992	60.9029	175.947	41.0054	1
ENSG00000176049	JAKMIP2	janus kinase and microtubule interacting protein 2 [Source:HGNC Symbol;Acc:29067]	protein_coding	0.0839583	0.0586255	0.17639	0.157828	0.0606968	0.308656	0.19624	0.263796	0.141207	0.109217	1
ENSG00000176476	CCDC101	coiled-coil domain containing 101 [Source:HGNC Symbol;Acc:25156]	protein_coding	2.04864	1.81239	2.14607	1.66598	1.01592	2.17965	2.21319	2.30403	2.45218	0.978055	1
ENSG00000176597	B3GNT5	UDP-GlcNAc:betaGal beta-1,3-N-acetylglucosaminyltransferase 5 [Source:HGNC Symbol;Acc:15684]	protein_coding	0.0431943	0.0578708	0.0306865	0.0477099	0.107517	0.764048	0.70978	0.523302	0.418267	0.321107	1
ENSG00000176887	SOX11	SRY (sex determining region Y)-box 11 [Source:HGNC Symbol;Acc:11191]	protein_coding	0.0890824	0.0170978	0	0	0.00507556	2.58389	2.6922	2.31482	1.13302	0.454873	1
ENSG00000177098	SCN4B	sodium channel, voltage-gated, type IV, beta subunit [Source:HGNC Symbol;Acc:10592]	protein_coding	0.0973228	0.126938	0.00325154	0.00177119	0.021824	2.54695	2.36269	0.580033	0.397026	0.56145	1
ENSG00000177679	SRRM3	serine/arginine repetitive matrix 3 [Source:HGNC Symbol;Acc:26729]	protein_coding	0.264069	0.238956	0.63287	0.411462	0.418858	0.750583	0.712615	0.665676	0.456518	0.151607	1
ENSG00000177822	AC108142.1		lincRNA	0.087079	0.0552408	0.0307431	0.0380261	0.0196113	0.28795	0.344275	0.48568	0.300736	0.10585	1
ENSG00000178464	CTD-2192J16.15		pseudogene	96.3668	98.118	116.835	90.4819	45.4488	113.375	96.0174	98.9982	137.84	58.5273	1
ENSG00000178821	TMEM52	transmembrane protein 52 [Source:HGNC Symbol;Acc:27916]	protein_coding	0.275314	0.161484	0.142631	0.107442	0.0367837	0.302073	0.284167	0.203497	0.383439	0.081786	1
ENSG00000178860	MSC	musculin [Source:HGNC Symbol;Acc:7321]	protein_coding	2.6662	3.53013	1.10378	0.624341	1.25377	5.96698	4.24236	3.84916	7.16139	2.00776	1
ENSG00000179855	GIPC3	GIPC PDZ domain containing family, member 3 [Source:HGNC Symbol;Acc:18183]	protein_coding	0.267191	0.288012	0.0262598	0.0254459	0.0515292	0.680838	0.477564	0.468811	0.284408	0.157696	1
ENSG00000180139	RP11-399O19.5		antisense	0.338247	0.779356	0.803701	0.919379	0.284518	0.441902	0.593914	1.31138	0.617621	0.671754	1
ENSG00000180537	RNF182	ring finger protein 182 [Source:HGNC Symbol;Acc:28522]	protein_coding	1.52378	1.15214	0.479855	0.439497	0.558912	3.3619	3.35468	3.2442	3.38744	1.30264	1
ENSG00000181260	RP11-145M9.3		pseudogene	1.38625	1.78239	1.3936	1.3688	0.351206	2.65667	1.12075	2.20367	3.5449	0.573	1
ENSG00000181444	ZNF467	zinc finger protein 467 [Source:HGNC Symbol;Acc:23154]	protein_coding	0.158586	0.1754	0.274568	0.234857	0.700139	0.732566	0.569178	0.503281	0.671692	0.266395	1
ENSG00000182199	SHMT2	serine hydroxymethyltransferase 2 (mitochondrial) [Source:HGNC Symbol;Acc:10852]	protein_coding	28.0985	31.4419	34.495	29.1123	11.9924	39.571	30.0745	39.3368	58.327	16.0173	1
ENSG00000182383	CTD-2503O16.2		pseudogene	5.17934	7.41155	10.0001	6.73462	2.7432	7.07742	7.08882	6.31615	8.5523	4.24129	1
ENSG00000183010	PYCR1	pyrroline-5-carboxylate reductase 1 [Source:HGNC Symbol;Acc:9721]	protein_coding	28.2357	28.2118	21.5531	16.1855	11.1638	39.3817	31.6956	40.3349	62.6944	13.9421	1
ENSG00000183098	GPC6	glypican 6 [Source:HGNC Symbol;Acc:4454]	protein_coding	0.700191	1.90319	9.73027	13.2491	6.40612	7.40475	7.51446	12.6938	8.54651	3.0519	1
ENSG00000183876	ARSI	arylsulfatase family, member I [Source:HGNC Symbol;Acc:32521]	protein_coding	2.52094	2.43253	2.17474	1.94186	0.867516	3.9773	3.38525	2.9296	3.07303	1.77382	1
ENSG00000185482	STAC3	SH3 and cysteine rich domain 3 [Source:HGNC Symbol;Acc:28423]	protein_coding	0.60038	0.519233	0.498187	0.509034	0.193184	0.711555	0.583321	0.677091	0.826858	0.284988	1
ENSG00000185565	LSAMP	limbic system-associated membrane protein [Source:HGNC Symbol;Acc:6705]	protein_coding	0.167687	0.216697	1.81975	2.05492	0.522013	2.52796	2.58331	2.30251	1.91846	0.443641	1
ENSG00000186480	INSIG1	insulin induced gene 1 [Source:HGNC Symbol;Acc:6083]	protein_coding	7.46013	11.192	30.772	21.3089	14.0562	42.4329	35.3874	34.7439	46.0401	6.51224	1
ENSG00000186854	TRABD2A	TraB domain containing 2A [Source:HGNC Symbol;Acc:27013]	protein_coding	1.15252	0.759414	0.425924	0.417298	0.17346	2.93046	2.77998	2.21204	3.09457	0.989769	1
ENSG00000187164	KIAA1598	KIAA1598 [Source:HGNC Symbol;Acc:29319]	protein_coding	3.54491	3.82356	1.83172	1.72983	2.23484	3.72521	3.09184	3.63435	4.51737	2.09248	1
ENSG00000187498	COL4A1	collagen, type IV, alpha 1 [Source:HGNC Symbol;Acc:2202]	protein_coding	23.8943	29.4983	15.9943	16.921	6.87648	60.7415	115.498	159.633	128.817	51.4927	1
ENSG00000187764	SEMA4D	sema domain, immunoglobulin domain (Ig), transmembrane domain (TM) and short cytoplasmic domain, (semaphorin) 4D [Source:HGNC Symbol;Acc:10732]	protein_coding	0.542837	0.856279	0.190189	0.249538	0.379705	0.754393	0.697881	0.586049	0.709835	0.327369	1
ENSG00000187800	PEAR1	platelet endothelial aggregation receptor 1 [Source:HGNC Symbol;Acc:33631]	protein_coding	1.1033	1.82205	2.77856	2.49348	0.790243	16.7607	16.2427	12.0394	8.5514	3.73672	1
ENSG00000187840	EIF4EBP1	eukaryotic translation initiation factor 4E binding protein 1 [Source:HGNC Symbol;Acc:3288]	protein_coding	38.5594	33.1319	45.759	27.5754	13.8697	44.4122	33.1565	48.3506	74.0113	10.5762	1
ENSG00000187867	PALM3	paralemmin 3 [Source:HGNC Symbol;Acc:33274]	protein_coding	0.311495	0.239784	0.25091	0.111746	0.0938666	0.696982	0.495284	0.793214	0.52796	0.16957	1
ENSG00000187955	COL14A1	collagen, type XIV, alpha 1 [Source:HGNC Symbol;Acc:2191]	protein_coding	0.0866525	0.240568	0.519923	0.601637	0.806628	1.6512	1.00945	1.00168	2.99249	0.220968	1
ENSG00000189184	PCDH18	protocadherin 18 [Source:HGNC Symbol;Acc:14268]	protein_coding	20.0196	19.9882	32.0311	38.0677	14.9467	58.3602	58.4086	69.6619	77.2178	32.9342	1
ENSG00000196196	HRCT1	histidine rich carboxyl terminus 1 [Source:HGNC Symbol;Acc:33872]	protein_coding	1.71156	1.05492	1.60143	1.24724	0.608884	1.10486	1.40563	1.77408	2.00618	0.920789	1
ENSG00000196503	ARL9	ADP-ribosylation factor-like 9 [Source:HGNC Symbol;Acc:23592]	protein_coding	0.433403	0.304664	0.0460889	0.0210817	0.0802401	0.801007	0.568285	0.683256	0.612098	0.0627268	1
ENSG00000196517	SLC6A9	solute carrier family 6 (neurotransmitter transporter, glycine), member 9 [Source:HGNC Symbol;Acc:11056]	protein_coding	1.99538	5.09842	7.2558	7.87482	4.10468	4.8577	1.78576	4.25871	11.8479	1.07823	1
ENSG00000196557	CACNA1H	calcium channel, voltage-dependent, T type, alpha 1H subunit [Source:HGNC Symbol;Acc:1395]	protein_coding	0.113505	0.314015	0.0782343	0.0940229	0.272362	0.620291	0.614236	0.32134	0.0903901	0.048992	1
ENSG00000196932	TMEM26	transmembrane protein 26 [Source:HGNC Symbol;Acc:28550]	protein_coding	0.214541	0.241819	0.119176	0.187422	0.486011	0.298591	0.22234	0.279165	0.707688	0.114685	1
ENSG00000197147	LRRC8B	leucine rich repeat containing 8 family, member B [Source:HGNC Symbol;Acc:30692]	protein_coding	0.263175	0.302422	0.0387492	0.0360294	0.123972	0.44102	0.471311	0.390241	0.263986	0.160332	1
ENSG00000197977	ELOVL2	ELOVL fatty acid elongase 2 [Source:HGNC Symbol;Acc:14416]	protein_coding	0.199936	0.146543	0.134089	0.114694	0.0392778	4.62215	4.84687	6.40732	5.96997	0.549043	1
ENSG00000198286	CARD11	caspase recruitment domain family, member 11 [Source:HGNC Symbol;Acc:16393]	protein_coding	0.0522011	0.056779	0.00214174	0.00399778	0.00447548	0.307446	0.30474	0.250929	0.0671733	0.00858585	1
ENSG00000198768	APCDD1L	adenomatosis polyposis coli down-regulated 1-like [Source:HGNC Symbol;Acc:26892]	protein_coding	2.51282	1.7374	1.36326	1.56774	0.433978	6.04783	8.90906	12.4705	6.19434	3.70126	1
ENSG00000198846	TOX	thymocyte selection-associated high mobility group box [Source:HGNC Symbol;Acc:18988]	protein_coding	1.13349	1.22427	5.80736	6.68054	2.26925	5.52996	4.99221	5.86552	4.45261	0.310133	1
ENSG00000198855	FICD	FIC domain containing [Source:HGNC Symbol;Acc:18416]	protein_coding	2.81805	3.72071	3.09354	3.43394	6.64791	5.2152	2.71852	2.75463	9.03778	4.36297	1
ENSG00000205336	GPR56	G protein-coupled receptor 56 [Source:HGNC Symbol;Acc:4512]	protein_coding	1.57805	0.593739	0.214577	0.133764	0.248663	5.02706	4.37538	2.3248	1.81719	1.39587	1
ENSG00000213420	GPC2	glypican 2 [Source:HGNC Symbol;Acc:4450]	protein_coding	0.468018	0.292954	0.275137	0.287505	0.176423	1.82894	1.83095	2.07202	1.49394	0.47767	1
ENSG00000213530	AC004894.2		pseudogene	0.314212	0.225263	0.250258	0.405152	0.0391166	0.440103	0.19372	0.427926	0.679609	0.0731669	1
ENSG00000223609	HBD	hemoglobin, delta [Source:HGNC Symbol;Acc:4829]	protein_coding	0.210783	0.167126	0.0345539	0	0.0109146	13.2478	30.3297	12.4986	37.3911	2.67224	1
ENSG00000224945	RP11-82L18.2		sense_intronic	2.3652	2.30868	0.543615	0.519458	2.19453	5.73268	5.46871	3.84369	4.45325	2.85492	1
ENSG00000224962	PSAT1P4	phosphoserine aminotransferase 1 pseudogene 4 [Source:HGNC Symbol;Acc:43990]	pseudogene	0.471399	1.2034	2.2689	2.38386	0.584907	1.30984	0.664416	1.54571	2.97195	0.078537	1
ENSG00000225067	RPL23AP2	ribosomal protein L23a pseudogene 2 [Source:HGNC Symbol;Acc:10319]	pseudogene	10.7874	10.2258	12.6429	7.46482	3.97218	12.155	11.1043	10.0291	12.5664	6.19969	1
ENSG00000226380	AC058791.1		lincRNA	3.36911	3.15228	1.78445	1.96665	4.80963	6.74487	6.00091	3.77744	2.10985	4.65242	1
ENSG00000226608	FTLP3	ferritin, light polypeptide pseudogene 3 [Source:HGNC Symbol;Acc:4000]	pseudogene	126.058	189.727	452.044	391.99	471.319	368.434	302.25	299.441	569.791	267.917	1
ENSG00000228499	TMSB10P1	thymosin beta 10 pseudogene 1 [Source:HGNC Symbol;Acc:41949]	pseudogene	160.106	108.923	136.84	54.668	41.8358	257.534	254.044	232.989	269.527	127.564	1
ENSG00000229133	RPS7P4	ribosomal protein S7 pseudogene 4 [Source:HGNC Symbol;Acc:36000]	pseudogene	2.25715	1.89201	2.41629	1.25196	0.923331	2.07476	1.70437	1.54174	2.82657	0.918639	1
ENSG00000229207	RP11-571F15.6		pseudogene	10.5673	10.9382	9.69346	9.51095	4.60275	10.693	10.4597	15.056	12.5218	2.57803	1
ENSG00000229638	RP11-110C15.4		pseudogene	105.213	100.286	119.893	79.9807	45.1561	108.379	95.8836	97.2585	116.577	56.4571	1
ENSG00000230207	RP11-87M1.1		pseudogene	67.2567	65.5582	68.7806	51.1717	28.7007	71.3808	63.6454	63.7619	74.9314	37.0946	1
ENSG00000230734	RPL10P3	ribosomal protein L10 pseudogene 3 [Source:HGNC Symbol;Acc:23300]	pseudogene	16.2825	16.2329	24.1931	13.5942	7.56389	17.3938	15.9532	17.1437	26.0371	9.38928	1
ENSG00000230787	PSAT1P3	phosphoserine aminotransferase 1 pseudogene 3 [Source:HGNC Symbol;Acc:43989]	pseudogene	0.405939	0.725169	1.10813	1.77895	0.395116	1.03261	0.412068	1.44648	1.88131	0.128335	1
ENSG00000233143	AC009492.1		lincRNA	0.611618	0.539183	0.0329053	0.117172	0.775547	1.98679	3.42983	2.99127	1.17002	1.21385	1
ENSG00000233913	CTC-575D19.1		pseudogene	51.429	54.6109	71.965	55.6518	24.7426	62.3057	49.9574	53.9737	76.59	30.1114	1
ENSG00000234741	GAS5	growth arrest-specific 5 (non-protein coding) [Source:HGNC Symbol;Acc:16355]	processed_transcript	38.5261	42.8846	66.4416	41.2037	13.8632	52.6638	43.4917	46.6134	67.3141	24.3525	1
ENSG00000234883	MIR155HG	MIR155 host gene (non-protein coding) [Source:HGNC Symbol;Acc:35460]	lincRNA	0.653551	0.241915	0.335409	0.0973897	0.0768294	1.39831	1.65695	1.30054	0.339906	0.2574	1
ENSG00000236824	BCYRN1	brain cytoplasmic RNA 1 [Source:HGNC Symbol;Acc:1022]	lincRNA	1.12191	0.5601	0.73105	0.596593	0.741464	1.1947	1.6158	1.6532	1.51832	0.448058	1
ENSG00000239268	RP11-384F7.2		processed_transcript	0.13261	0.128784	1.32232	1.17461	0.122362	1.1603	1.78079	1.44082	1.17712	0.258173	1
ENSG00000241714	RP11-76P2.2		antisense	0.0690148	0.246959	0.844319	1.37072	0.680689	0.185198	0.512289	0.5601	1.73505	0.376126	1
ENSG00000246662	LINC00535	long intergenic non-protein coding RNA 535 [Source:HGNC Symbol;Acc:43644]	lincRNA	0.0275355	0.0431529	0.080565	0.13717	0.131002	0.0550347	0.0762927	0.119527	0.237082	0.0279948	1
ENSG00000248498	ASNSP1	asparagine synthetase pseudogene 1 [Source:HGNC Symbol;Acc:754]	pseudogene	0.0999141	0.254433	0.633041	0.514118	0.0861045	0.568467	0.231824	0.674622	1.15734	0.0855596	1
ENSG00000249992	TMEM158	transmembrane protein 158 (gene/pseudogene) [Source:HGNC Symbol;Acc:30293]	protein_coding	25.1738	14.4058	3.80014	2.2067	10.79	88.7247	83.0359	47.0114	37.123	90.363	1
ENSG00000250033	SLC7A11-AS1	SLC7A11 antisense RNA 1 [Source:HGNC Symbol;Acc:44064]	processed_transcript	0.0704073	0.0936143	0.167397	0.263754	0.0614511	0.806172	0.41079	0.410916	0.590064	0.196148	1
ENSG00000251470	ASNSP4	asparagine synthetase pseudogene 4 [Source:HGNC Symbol;Acc:39400]	pseudogene	0.53204	1.00023	2.82074	1.6252	0.447068	2.08772	0.815528	1.66564	4.09709	0.300169	1
ENSG00000253250	RP11-122A3.2	uncharacterized protein LOC100127983 [Source:RefSeq peptide;Acc:NP_001177901]	protein_coding	3.77133	2.87274	2.72754	2.58608	1.28735	4.56424	3.75935	4.54014	4.35495	1.12042	1
ENSG00000253873	PCDHGA11	protocadherin gamma subfamily A, 11 [Source:HGNC Symbol;Acc:8698]	protein_coding	1.01236	0.764033	1.47606	2.37871	2.50298	2.7805	2.64914	1.82761	0.832677	0.690625	1
ENSG00000258947	TUBB3	Tubulin beta-3 chain [Source:UniProtKB/Swiss-Prot;Acc:Q13509]	protein_coding	0.154299	0.0700038	0.067297	0.103911	0.0906746	0.290115	0.257101	0.258902	0.431251	0.117607	1
ENSG00000259250	RP11-50C13.1		antisense	1.74144	1.8094	2.93721	2.07109	3.50501	3.59104	2.29443	1.9415	3.00538	1.4778	1
ENSG00000259811	RP11-863P13.3		processed_transcript	0.0540782	0.188747	0.363029	0.570751	0.750272	0.564628	0.495859	0.791403	1.17944	0.370293	1
ENSG00000260517	RP11-426C22.5		lincRNA	0.519528	0.593595	1.44644	1.63958	2.13366	1.73075	2.23709	2.33448	3.14105	1.52449	1
ENSG00000005379	BZRAP1	benzodiazapine receptor (peripheral) associated protein 1 [Source:HGNC Symbol;Acc:16831]	protein_coding	0.660185	0.771461	1.16235	1.26182	0.319961	0.952995	0.584944	0.330304	0.452092	0.10782	2
ENSG00000006757	PNPLA4	patatin-like phospholipase domain containing 4 [Source:HGNC Symbol;Acc:24887]	protein_coding	3.25023	3.30095	2.50379	2.10579	1.31348	2.22561	1.83518	1.2159	1.47475	0.822556	2
ENSG00000013619	MAMLD1	mastermind-like domain containing 1 [Source:HGNC Symbol;Acc:2568]	protein_coding	6.18857	9.66581	6.71663	6.73097	2.45976	7.20993	6.63019	8.8969	5.74217	2.41304	2
ENSG00000023171	GRAMD1B	GRAM domain containing 1B [Source:HGNC Symbol;Acc:29214]	protein_coding	3.34996	2.35299	0.937726	1.22195	1.37352	1.12978	1.22558	0.846868	0.628459	1.33752	2
ENSG00000049192	ADAMTS6	ADAM metallopeptidase with thrombospondin type 1 motif, 6 [Source:HGNC Symbol;Acc:222]	protein_coding	8.05235	6.29659	4.10869	4.67102	2.44707	1.20552	1.60296	1.78688	0.476804	0.247417	2
ENSG00000055813	CCDC85A	coiled-coil domain containing 85A [Source:HGNC Symbol;Acc:29400]	protein_coding	6.24229	2.72025	0.854671	0.96902	0.138204	0.156915	0.183408	0.171842	0.0474411	0.0127129	2
ENSG00000058668	ATP2B4	ATPase, Ca++ transporting, plasma membrane 4 [Source:HGNC Symbol;Acc:817]	protein_coding	113.203	130.141	56.5148	68.8021	88.6937	61.9031	64.9753	57.486	39.2138	111.699	2
ENSG00000060718	COL11A1	collagen, type XI, alpha 1 [Source:HGNC Symbol;Acc:2186]	protein_coding	54.5865	81.3353	103.413	123.12	20.9227	4.03569	5.24365	6.51206	4.15379	18.5735	2
ENSG00000068079	IFI35	interferon-induced protein 35 [Source:HGNC Symbol;Acc:5399]	protein_coding	10.3596	8.47378	7.57145	5.51814	4.53233	5.63622	5.37598	6.2873	8.21703	4.10095	2
ENSG00000070159	PTPN3	protein tyrosine phosphatase, non-receptor type 3 [Source:HGNC Symbol;Acc:9655]	protein_coding	0.822117	0.811049	0.100549	0.115186	0.225986	0.260638	0.248921	0.193285	0.131781	0.269394	2
ENSG00000073756	PTGS2	prostaglandin-endoperoxide synthase 2 (prostaglandin G/H synthase and cyclooxygenase) [Source:HGNC Symbol;Acc:9605]	protein_coding	142.43	36.8521	12.439	22.5934	16.5759	3.29114	0.52494	0.148716	0.483619	3.95757	2
ENSG00000077420	APBB1IP	amyloid beta (A4) precursor protein-binding, family B, member 1 interacting protein [Source:HGNC Symbol;Acc:17379]	protein_coding	4.11958	6.02786	2.98596	3.92092	5.03836	0.106185	0.0831731	0.112373	0.0697944	0.0221528	2
ENSG00000080573	COL5A3	collagen, type V, alpha 3 [Source:HGNC Symbol;Acc:14864]	protein_coding	10.6758	20.0139	26.0266	25.5388	7.41431	5.97885	6.25569	8.52391	3.52226	0.846505	2
ENSG00000081041	CXCL2	chemokine (C-X-C motif) ligand 2 [Source:HGNC Symbol;Acc:4603]	protein_coding	4.49828	1.2325	2.07031	2.29696	0.259738	4.73025	0.311945	0.122961	0.408865	0.300785	2
ENSG00000082482	KCNK2	potassium channel, subfamily K, member 2 [Source:HGNC Symbol;Acc:6277]	protein_coding	19.8375	15.4535	14.07	14.9465	5.34486	2.37383	2.76702	2.33541	0.376498	0.688754	2
ENSG00000090339	ICAM1	intercellular adhesion molecule 1 [Source:HGNC Symbol;Acc:5344]	protein_coding	16.5811	38.6173	39.6963	44.6233	25.9375	26.6678	32.2039	13.5328	10.6637	5.26236	2
ENSG00000093072	CECR1	cat eye syndrome chromosome region, candidate 1 [Source:HGNC Symbol;Acc:1839]	protein_coding	4.6153	4.50481	1.35019	1.61465	1.38428	0.17139	0.120093	0.0937476	0.0799328	0.0569568	2
ENSG00000095380	NANS	N-acetylneuraminic acid synthase [Source:HGNC Symbol;Acc:19237]	protein_coding	11.9609	10.05	7.75271	5.37196	4.36755	5.78371	5.13752	5.17557	6.53028	2.93843	2
ENSG00000100292	HMOX1	heme oxygenase (decycling) 1 [Source:HGNC Symbol;Acc:5013]	protein_coding	19.6083	20.0396	42.3608	18.7946	11.4448	12.3708	10.4285	8.48115	13.1511	2.75737	2
ENSG00000101194	SLC17A9	solute carrier family 17, member 9 [Source:HGNC Symbol;Acc:16192]	protein_coding	23.8771	18.0611	7.77945	7.05094	6.92	2.97182	2.84406	2.47854	1.87989	0.838706	2
ENSG00000101210	EEF1A2	eukaryotic translation elongation factor 1 alpha 2 [Source:HGNC Symbol;Acc:3192]	protein_coding	18.3965	33.5273	11.7389	11.0251	18.8441	5.38363	6.27817	6.34311	7.44971	22.2325	2
ENSG00000101938	CHRDL1	chordin-like 1 [Source:HGNC Symbol;Acc:29861]	protein_coding	6.49719	7.55944	0.207867	0.356642	0.976031	0.309945	0.214534	0.0668293	0.0104928	0.00982484	2
ENSG00000103257	SLC7A5	solute carrier family 7 (amino acid transporter light chain, L system), member 5 [Source:HGNC Symbol;Acc:11063]	protein_coding	15.3862	23.2659	127.438	125.626	27.8422	30.6508	14.3929	29.6879	38.5881	4.44097	2
ENSG00000103490	PYCARD	PYD and CARD domain containing [Source:HGNC Symbol;Acc:16608]	protein_coding	6.44591	4.87615	5.87683	3.03629	1.88778	3.52278	2.97441	2.97144	3.24544	1.66396	2
ENSG00000104381	GDAP1	ganglioside induced differentiation associated protein 1 [Source:HGNC Symbol;Acc:15968]	protein_coding	2.27993	1.42938	0.732832	0.559112	0.898994	0.902895	0.740005	0.68129	0.291884	0.186135	2
ENSG00000105048	TNNT1	troponin T type 1 (skeletal, slow) [Source:HGNC Symbol;Acc:11948]	protein_coding	5.45382	4.78738	2.8789	1.82097	0.812704	0.390001	0.258825	0.233856	0.0699214	0.0560876	2
ENSG00000105373	GLTSCR2	glioma tumor suppressor candidate region gene 2 [Source:HGNC Symbol;Acc:4333]	protein_coding	63.9372	73.9999	110.489	83.6249	38.9094	81.0504	65.9998	65.8202	88.7561	42.9175	2
ENSG00000105640	RPL18A	ribosomal protein L18a [Source:HGNC Symbol;Acc:10311]	protein_coding	165.512	165.505	206.088	148.205	64.3542	144.497	135.88	138.305	172.611	81.1201	2
ENSG00000105889	STEAP1B	STEAP family member 1B [Source:HGNC Symbol;Acc:41907]	protein_coding	7.67553	4.34098	0.735413	0.918511	1.6358	2.01199	1.84729	1.21022	0.734227	0.541696	2
ENSG00000106003	LFNG	LFNG O-fucosylpeptide 3-beta-N-acetylglucosaminyltransferase [Source:HGNC Symbol;Acc:6560]	protein_coding	2.75747	1.64623	3.57859	1.28036	1.62315	0.5554	0.894603	0.928682	0.752738	0.188392	2
ENSG00000106123	EPHB6	EPH receptor B6 [Source:HGNC Symbol;Acc:3396]	protein_coding	7.36277	13.9292	3.80839	3.54084	1.09128	0.14901	0.145304	0.0936676	0.0391421	0.0252257	2
ENSG00000107562	CXCL12	chemokine (C-X-C motif) ligand 12 [Source:HGNC Symbol;Acc:10672]	protein_coding	34.104	24.2829	21.7207	14.2058	1.62905	1.30283	0.783573	0.724757	0.0807482	0.08775	2
ENSG00000107798	LIPA	lipase A, lysosomal acid, cholesterol esterase [Source:HGNC Symbol;Acc:6617]	protein_coding	30.9055	42.9417	43.1429	40.9196	12.4146	10.5755	9.25565	9.29781	13.2522	6.59997	2
ENSG00000107968	MAP3K8	mitogen-activated protein kinase kinase kinase 8 [Source:HGNC Symbol;Acc:6860]	protein_coding	6.5907	7.69304	8.88603	10.2344	4.50922	1.21548	0.783403	0.459375	0.634239	0.291786	2
ENSG00000108375	RNF43	ring finger protein 43 [Source:HGNC Symbol;Acc:18505]	protein_coding	0.0576634	0.100262	0.429442	0.3329	0.14606	0.132837	0.142518	0.064049	0.0632392	0.0271181	2
ENSG00000108551	RASD1	RAS, dexamethasone-induced 1 [Source:HGNC Symbol;Acc:15828]	protein_coding	3.60307	1.49227	10.2727	8.99037	1.87471	1.50712	0.651899	0.69076	0.820694	0.268647	2
ENSG00000108821	COL1A1	collagen, type I, alpha 1 [Source:HGNC Symbol;Acc:2197]	protein_coding	1066.41	1469.33	1953.65	2227.28	941.999	829.801	1323.59	1705.6	1141.23	411.325	2
ENSG00000108947	EFNB3	ephrin-B3 [Source:HGNC Symbol;Acc:3228]	protein_coding	2.11337	1.58231	0.876368	0.525704	0.451489	1.26075	0.899156	0.753722	0.44605	0.0767335	2
ENSG00000108984	MAP2K6	mitogen-activated protein kinase kinase 6 [Source:HGNC Symbol;Acc:6846]	protein_coding	1.34859	1.83664	3.22778	3.37488	1.47735	0.854309	0.724634	0.753469	0.750821	0.202493	2
ENSG00000110031	LPXN	leupaxin [Source:HGNC Symbol;Acc:14061]	protein_coding	21.7917	14.2938	3.96323	3.59232	7.00108	6.58395	7.21772	5.38311	3.45408	9.13453	2
ENSG00000110427	KIAA1549L	KIAA1549-like [Source:HGNC Symbol;Acc:24836]	protein_coding	6.08673	4.82746	1.93426	2.19897	3.98234	0.964938	1.18273	1.38242	0.30002	0.403122	2
ENSG00000111981	ULBP1	UL16 binding protein 1 [Source:HGNC Symbol;Acc:14893]	protein_coding	1.4938	1.30985	1.35196	1.44831	0.644931	1.56096	1.23959	1.17289	1.0391	0.475315	2
ENSG00000112149	CD83	CD83 molecule [Source:HGNC Symbol;Acc:1703]	protein_coding	2.47633	2.53025	1.16661	1.19283	2.74557	1.16938	1.07859	1.26571	0.932435	0.458842	2
ENSG00000113389	NPR3	natriuretic peptide receptor C/guanylate cyclase C (atrionatriuretic peptide receptor C) [Source:HGNC Symbol;Acc:7945]	protein_coding	2.64075	1.13852	0.385013	0.421576	0.715094	0.290418	0.306607	0.227056	0.154897	0.0821271	2
ENSG00000114315	HES1	hairy and enhancer of split 1, (Drosophila) [Source:HGNC Symbol;Acc:5192]	protein_coding	30.0988	1.51021	38.0634	18.4227	0.883494	26.791	4.30804	1.3285	1.67725	3.3037	2
ENSG00000115414	FN1	fibronectin 1 [Source:HGNC Symbol;Acc:3778]	protein_coding	446.783	626.303	917.295	1079.25	449.213	480.55	607.757	583.597	377.968	799.71	2
ENSG00000115738	ID2	inhibitor of DNA binding 2, dominant negative helix-loop-helix protein [Source:HGNC Symbol;Acc:5361]	protein_coding	33.5504	16.5623	73.2123	54.2811	25.7096	19.1926	11.054	12.195	14.6738	5.88864	2
ENSG00000116106	EPHA4	EPH receptor A4 [Source:HGNC Symbol;Acc:3388]	protein_coding	5.52172	7.59479	3.26546	3.84638	1.06478	3.15574	2.9834	4.29933	4.18995	6.35199	2
ENSG00000116132	PRRX1	paired related homeobox 1 [Source:HGNC Symbol;Acc:9142]	protein_coding	40.4619	27.1116	10.88	12.98	25.2666	11.3169	9.61928	6.68876	2.98157	1.81414	2
ENSG00000116741	RGS2	regulator of G-protein signaling 2, 24kDa [Source:HGNC Symbol;Acc:9998]	protein_coding	15.9405	5.79835	16.7732	9.02736	6.19953	18.4003	7.96844	4.48121	9.27336	10.6874	2
ENSG00000116962	NID1	nidogen 1 [Source:HGNC Symbol;Acc:7821]	protein_coding	71.7304	72.0457	29.976	36.8779	19.6422	32.6257	40.5862	47.3649	35.8344	15.6995	2
ENSG00000117152	RGS4	regulator of G-protein signaling 4 [Source:HGNC Symbol;Acc:10000]	protein_coding	40.0872	24.6761	1.08974	0.889817	6.03694	4.06605	3.75419	4.61552	1.61468	22.7941	2
ENSG00000117318	ID3	inhibitor of DNA binding 3, dominant negative helix-loop-helix protein [Source:HGNC Symbol;Acc:5362]	protein_coding	106.24	15.5253	67.8483	40.8259	5.72332	94.6214	31.5275	17.9331	18.1833	11.7251	2
ENSG00000118263	KLF7	Kruppel-like factor 7 (ubiquitous) [Source:HGNC Symbol;Acc:6350]	protein_coding	7.46284	6.62085	11.9125	15.0184	6.34829	4.91386	3.54509	5.65167	2.78774	5.8288	2
ENSG00000118515	SGK1	serum/glucocorticoid regulated kinase 1 [Source:HGNC Symbol;Acc:10810]	protein_coding	61.148	44.3069	49.7991	39.515	9.82596	13.7886	8.77018	4.31932	5.62005	8.80324	2
ENSG00000119508	NR4A3	nuclear receptor subfamily 4, group A, member 3 [Source:HGNC Symbol;Acc:7982]	protein_coding	8.32609	3.70498	1.68288	1.97455	1.66924	0.616913	0.155045	0.0932641	0.0776556	0.32346	2
ENSG00000120129	DUSP1	dual specificity phosphatase 1 [Source:HGNC Symbol;Acc:3064]	protein_coding	258.137	158.343	401.818	371.515	134.356	349.927	185.132	90.8913	110.781	138.302	2
ENSG00000120738	EGR1	early growth response 1 [Source:HGNC Symbol;Acc:3238]	protein_coding	361.501	220.911	360.855	432.2	124.25	381.524	126.605	95.1782	112.754	156.027	2
ENSG00000120875	DUSP4	dual specificity phosphatase 4 [Source:HGNC Symbol;Acc:3070]	protein_coding	7.6074	3.88719	0.367078	0.502373	2.94686	0.447898	0.587495	0.727693	1.09298	4.99598	2
ENSG00000121075	TBX4	T-box 4 [Source:HGNC Symbol;Acc:11603]	protein_coding	13.2843	12.4082	0.201845	0.220397	0.590962	0.386149	0.367352	0.149295	0.0770506	0.0206019	2
ENSG00000121904	CSMD2	CUB and Sushi multiple domains 2 [Source:HGNC Symbol;Acc:19290]	protein_coding	0.979794	0.771697	0.323821	0.369048	0.97292	0.0929092	0.0970418	0.0573058	0.0240008	0.022626	2
ENSG00000123080	CDKN2C	cyclin-dependent kinase inhibitor 2C (p18, inhibits CDK4) [Source:HGNC Symbol;Acc:1789]	protein_coding	8.32181	5.73565	17.3536	11.9026	5.38451	3.70003	4.11201	5.22806	1.73598	0.759044	2
ENSG00000123358	NR4A1	nuclear receptor subfamily 4, group A, member 1 [Source:HGNC Symbol;Acc:7980]	protein_coding	61.9691	12.6134	42.4855	46.8394	3.39452	62.9565	23.4243	4.37752	2.97696	18.1426	2
ENSG00000124216	SNAI1	snail homolog 1 (Drosophila) [Source:HGNC Symbol;Acc:11128]	protein_coding	14.664	3.74272	17.7054	15.1691	3.06573	10.2673	4.50172	4.40457	3.84824	1.86975	2
ENSG00000124467	PSG8	pregnancy specific beta-1-glycoprotein 8 [Source:HGNC Symbol;Acc:9525]	protein_coding	1.70641	2.43254	0.966211	1.11802	1.7743	0.330407	0.414241	0.232861	0.403917	0.701205	2
ENSG00000125538	IL1B	interleukin 1, beta [Source:HGNC Symbol;Acc:5992]	protein_coding	1.60552	0.868916	1.29088	1.0419	0.361984	0.289619	0.133991	0.0480154	0.0185454	0.00674786	2
ENSG00000125740	FOSB	FBJ murine osteosarcoma viral oncogene homolog B [Source:HGNC Symbol;Acc:3797]	protein_coding	40.4016	15.7677	166.751	158.069	8.70453	68.8525	15.9934	8.95369	15.8121	14.4687	2
ENSG00000125968	ID1	inhibitor of DNA binding 1, dominant negative helix-loop-helix protein [Source:HGNC Symbol;Acc:5360]	protein_coding	117.807	8.88961	120.969	58.5475	3.36147	46.7485	15.6906	13.9284	6.05472	5.53498	2
ENSG00000126353	CCR7	chemokine (C-C motif) receptor 7 [Source:HGNC Symbol;Acc:1608]	protein_coding	6.36966	2.10943	4.07538	5.64607	1.77397	0.604464	0.6328	0.439918	0.474211	1.01618	2
ENSG00000127124	HIVEP3	human immunodeficiency virus type I enhancer binding protein 3 [Source:HGNC Symbol;Acc:13561]	protein_coding	0.694929	0.516389	0.387558	0.416718	0.31397	0.304905	0.416872	0.30901	0.0878855	0.131601	2
ENSG00000127311	HELB	helicase (DNA) B [Source:HGNC Symbol;Acc:17196]	protein_coding	0.725106	0.554341	0.257606	0.361	0.319114	0.273306	0.219875	0.219449	0.137738	0.124915	2
ENSG00000127528	KLF2	Kruppel-like factor 2 (lung) [Source:HGNC Symbol;Acc:6347]	protein_coding	17.7463	12.3306	45.1552	28.5886	9.5854	12.9573	6.40925	6.7555	5.97604	5.53442	2
ENSG00000128165	ADM2	adrenomedullin 2 [Source:HGNC Symbol;Acc:28898]	protein_coding	2.58506	7.4094	9.01452	10.8812	2.34296	3.61002	1.17122	2.64167	6.5416	0.328658	2
ENSG00000130208	APOC1	apolipoprotein C-I [Source:HGNC Symbol;Acc:607]	protein_coding	2.18575	2.08713	1.54197	0.878716	0.361877	2.13627	1.00426	0.805398	1.39999	0.843588	2
ENSG00000130707	ASS1	argininosuccinate synthase 1 [Source:HGNC Symbol;Acc:758]	protein_coding	37.243	83.6744	76.5892	61.3648	23.3432	11.3173	9.62095	2.44392	2.43908	1.40966	2
ENSG00000131979	GCH1	GTP cyclohydrolase 1 [Source:HGNC Symbol;Acc:4193]	protein_coding	2.05796	2.99426	1.27518	0.987864	0.292531	0.659166	0.441861	0.370398	1.02284	0.424677	2
ENSG00000132205	EMILIN2	elastin microfibril interfacer 2 [Source:HGNC Symbol;Acc:19881]	protein_coding	18.8821	13.3223	8.33022	7.84331	7.2473	0.623452	0.447112	0.22519	0.115802	0.0887976	2
ENSG00000133106	EPSTI1	epithelial stromal interaction 1 (breast) [Source:HGNC Symbol;Acc:16465]	protein_coding	1.02673	1.2857	0.954336	0.834885	0.392724	0.808859	0.724323	0.92358	0.947706	0.456545	2
ENSG00000134247	PTGFRN	prostaglandin F2 receptor negative regulator [Source:HGNC Symbol;Acc:9601]	protein_coding	4.95814	5.81307	0.444703	0.439388	2.24212	0.409541	0.418753	0.176993	0.0424345	0.0417118	2
ENSG00000134463	ECHDC3	enoyl CoA hydratase domain containing 3 [Source:HGNC Symbol;Acc:23489]	protein_coding	3.64082	3.61841	2.80315	2.09333	1.13302	2.24743	2.20299	1.99085	1.71371	0.385289	2
ENSG00000134516	DOCK2	dedicator of cytokinesis 2 [Source:HGNC Symbol;Acc:2988]	protein_coding	1.25331	1.31444	0.404592	0.590837	0.574406	0.101908	0.103682	0.128591	0.0389046	0.0523986	2
ENSG00000135074	ADAM19	ADAM metallopeptidase domain 19 [Source:HGNC Symbol;Acc:197]	protein_coding	17.6604	21.516	15.2324	16.3528	5.68673	8.20674	12.6966	19.4253	7.94152	12.3946	2
ENSG00000135424	ITGA7	integrin, alpha 7 [Source:HGNC Symbol;Acc:6143]	protein_coding	11.5793	18.726	3.36414	4.44937	11.451	6.41875	6.94472	3.42759	2.87863	7.83529	2
ENSG00000136010	ALDH1L2	aldehyde dehydrogenase 1 family, member L2 [Source:HGNC Symbol;Acc:26777]	protein_coding	12.6607	22.1102	17.9676	22.1827	8.72498	15.987	10.2851	16.5908	24.3708	3.01552	2
ENSG00000136244	IL6	interleukin 6 (interferon, beta 2) [Source:HGNC Symbol;Acc:6018]	protein_coding	24.8909	14.7513	44.4823	41.283	4.87722	9.87734	3.76589	2.38676	3.70485	3.30511	2
ENSG00000136826	KLF4	Kruppel-like factor 4 (gut) [Source:HGNC Symbol;Acc:6348]	protein_coding	13.1257	10.5597	40.2786	35.5228	16.4109	7.95227	2.35535	1.77501	5.07062	4.10834	2
ENSG00000136938	ANP32B	acidic (leucine-rich) nuclear phosphoprotein 32 family, member B [Source:HGNC Symbol;Acc:16677]	protein_coding	87.3151	62.4336	84.9105	56.0735	28.8616	63.0672	56.682	61.3368	60.0023	27.2608	2
ENSG00000136960	ENPP2	ectonucleotide pyrophosphatase/phosphodiesterase 2 [Source:HGNC Symbol;Acc:3357]	protein_coding	48.6569	32.0453	12.4967	10.5759	4.47773	2.96519	2.05366	1.38741	0.642187	0.183801	2
ENSG00000136997	MYC	v-myc myelocytomatosis viral oncogene homolog (avian) [Source:HGNC Symbol;Acc:7553]	protein_coding	47.9446	27.156	21.2036	18.2863	7.51687	37.0823	18.2186	13.2157	12.882	10.5328	2
ENSG00000137573	SULF1	sulfatase 1 [Source:HGNC Symbol;Acc:20391]	protein_coding	73.0855	274.558	339.984	454.807	134.747	0.976512	1.21547	0.92847	0.684646	0.261286	2
ENSG00000137959	IFI44L	interferon-induced protein 44-like [Source:HGNC Symbol;Acc:17817]	protein_coding	0.27273	0.289703	0.0622864	0.0766115	0.0346456	0.0328773	0.0333742	0.144227	0.107703	0.00750911	2
ENSG00000138166	DUSP5	dual specificity phosphatase 5 [Source:HGNC Symbol;Acc:3071]	protein_coding	58.9999	41.563	27.4982	32.6225	15.7166	80.906	29.2414	18.8684	14.244	27.1621	2
ENSG00000138623	SEMA7A	semaphorin 7A, GPI membrane anchor (John Milton Hagen blood group) [Source:HGNC Symbol;Acc:10741]	protein_coding	40.4002	35.1306	24.91	18.9711	17.3497	7.66303	11.2847	10.915	4.44889	7.68674	2
ENSG00000139514	SLC7A1	solute carrier family 7 (cationic amino acid transporter, y+ system), member 1 [Source:HGNC Symbol;Acc:11057]	protein_coding	26.9698	18.8818	16.5364	18.1931	10.4792	14.0819	9.67371	13.3437	13.5954	5.44578	2
ENSG00000140403	DNAJA4	DnaJ (Hsp40) homolog, subfamily A, member 4 [Source:HGNC Symbol;Acc:14885]	protein_coding	1.62569	1.724	0.440773	0.609524	1.20161	0.445272	0.337919	0.106788	0.0507122	0.0571792	2
ENSG00000141052	MYOCD	myocardin [Source:HGNC Symbol;Acc:16067]	protein_coding	3.97278	3.94188	0.492612	0.717387	0.714035	0.293178	0.510845	1.07865	0.442895	0.374483	2
ENSG00000142178	SIK1	salt-inducible kinase 1 [Source:HGNC Symbol;Acc:11142]	protein_coding	5.02866	1.05206	5.46878	4.87758	1.26338	9.94048	3.39689	1.27644	2.25353	3.14467	2
ENSG00000142632	ARHGEF19	Rho guanine nucleotide exchange factor (GEF) 19 [Source:HGNC Symbol;Acc:26604]	protein_coding	4.49099	2.93579	2.45126	2.08631	1.08966	1.88692	1.74742	2.10565	1.93492	0.626998	2
ENSG00000142937	RPS8	ribosomal protein S8 [Source:HGNC Symbol;Acc:10441]	protein_coding	204.404	216.151	285.977	187.42	92.6731	213.28	190.752	192.834	244.215	119.612	2
ENSG00000143322	ABL2	v-abl Abelson murine leukemia viral oncogene homolog 2 [Source:HGNC Symbol;Acc:77]	protein_coding	7.56857	6.95322	8.78219	9.67901	4.63053	6.11985	6.19775	5.98432	3.87975	8.64186	2
ENSG00000143850	PLEKHA6	pleckstrin homology domain containing, family A member 6 [Source:HGNC Symbol;Acc:17053]	protein_coding	10.9008	9.33	3.42329	4.23578	3.8655	3.2764	3.80909	3.71758	2.26671	5.05588	2
ENSG00000144063	MALL	mal, T-cell differentiation protein-like [Source:HGNC Symbol;Acc:6818]	protein_coding	3.50545	0.934246	0.465812	0.416705	0.433376	0.178786	0.113553	0.0628244	0.0250864	0.0419384	2
ENSG00000144655	CSRNP1	cysteine-serine-rich nuclear protein 1 [Source:HGNC Symbol;Acc:14300]	protein_coding	20.2088	8.06936	14.6512	15.4271	5.83171	15.7706	7.85344	8.00839	4.48792	11.1689	2
ENSG00000144802	NFKBIZ	nuclear factor of kappa light polypeptide gene enhancer in B-cells inhibitor, zeta [Source:HGNC Symbol;Acc:29805]	protein_coding	21.4435	17.3202	22.1364	33.0897	10.6363	42.0532	8.69686	6.21472	6.0161	10.6936	2
ENSG00000146950	SHROOM2	shroom family member 2 [Source:HGNC Symbol;Acc:630]	protein_coding	0.387725	0.166497	0.614456	0.382141	0.202731	0.305231	0.444648	0.331714	0.136931	0.0340557	2
ENSG00000147862	NFIB	nuclear factor I/B [Source:HGNC Symbol;Acc:7785]	protein_coding	2.93565	2.64848	0.293401	0.255892	0.292393	0.0489825	0.0301141	0	0.00187906	0.0121263	2
ENSG00000148803	FUOM	fucose mutarotase [Source:HGNC Symbol;Acc:24733]	protein_coding	10.1509	9.1739	9.52215	6.53992	4.07276	7.23205	7.21188	6.74904	9.15741	3.28646	2
ENSG00000148841	ITPRIP	inositol 1,4,5-trisphosphate receptor interacting protein [Source:HGNC Symbol;Acc:29370]	protein_coding	14.9838	10.1668	8.72325	10.6692	4.11836	18.6065	8.51736	6.94508	4.58841	6.65531	2
ENSG00000149506	ZP1	zona pellucida glycoprotein 1 (sperm receptor) [Source:HGNC Symbol;Acc:13187]	protein_coding	0.539355	0.630724	0.023341	0.00949021	0.00432391	0.157099	0.134343	0.161897	0.147152	0.0257231	2
ENSG00000149798	CDC42EP2	CDC42 effector protein (Rho GTPase binding) 2 [Source:HGNC Symbol;Acc:16263]	protein_coding	33.8233	25.5301	47.4792	51.7203	23.225	28.3211	17.5125	16.3139	16.0819	12.3795	2
ENSG00000151967	SCHIP1	schwannomin interacting protein 1 [Source:HGNC Symbol;Acc:15678]	protein_coding	0.905821	0.805758	1.18822	1.15459	0.45711	0.688499	0.5849	0.796554	0.340532	0.64778	2
ENSG00000153234	NR4A2	nuclear receptor subfamily 4, group A, member 2 [Source:HGNC Symbol;Acc:7981]	protein_coding	11.7032	0.450394	13.3053	13.868	0.441778	29.7632	4.31275	0.902353	1.32055	8.39415	2
ENSG00000154065	ANKRD29	ankyrin repeat domain 29 [Source:HGNC Symbol;Acc:27110]	protein_coding	11.0045	14.3722	6.70892	8.27429	10.3823	0.210225	0.172458	0.0856725	0.236667	2.2319	2
ENSG00000154930	ACSS1	acyl-CoA synthetase short-chain family member 1 [Source:HGNC Symbol;Acc:16091]	protein_coding	1.48913	1.32723	0.601382	0.571505	1.04346	0.215014	0.153231	0.120768	0.0892408	0.0182363	2
ENSG00000155090	KLF10	Kruppel-like factor 10 [Source:HGNC Symbol;Acc:11810]	protein_coding	30.2902	9.9405	31.0629	33.9744	9.36813	36.2357	16.0273	12.96	10.8062	17.3555	2
ENSG00000157734	SNX22	sorting nexin 22 [Source:HGNC Symbol;Acc:16315]	protein_coding	1.07122	0.804037	0.539091	0.489143	0.398585	1.01747	0.306797	0.44744	0.737349	0.18266	2
ENSG00000157927	RADIL	Ras association and DIL domains [Source:HGNC Symbol;Acc:22226]	protein_coding	0.376979	0.295928	0.220596	0.317745	0.176308	0.123438	0.0836769	0.0812781	0.0816153	0.0305634	2
ENSG00000158050	DUSP2	dual specificity phosphatase 2 [Source:HGNC Symbol;Acc:3068]	protein_coding	4.2774	0.782558	1.02184	1.041	0.195052	2.15633	0.403868	0.366472	0.229881	0.176036	2
ENSG00000158125	XDH	xanthine dehydrogenase [Source:HGNC Symbol;Acc:12805]	protein_coding	1.54975	1.20799	0.153697	0.158024	0.889738	0.339119	0.409851	0.188086	0.0901259	0.392617	2
ENSG00000158859	ADAMTS4	ADAM metallopeptidase with thrombospondin type 1 motif, 4 [Source:HGNC Symbol;Acc:220]	protein_coding	1.93672	1.12227	0.736595	0.741774	0.583793	0.462701	0.326533	0.181793	0.0970434	0.0544639	2
ENSG00000159860	FAM115D	family with sequence similarity 115, member D (pseudogene) [Source:HGNC Symbol;Acc:33603]	pseudogene	1.42651	0.860162	0.205639	0.291208	0.612181	0.353817	0.463942	0.274654	0.139686	0.570014	2
ENSG00000160200	CBS	cystathionine-beta-synthase [Source:HGNC Symbol;Acc:1550]	protein_coding	15.6244	19.6446	16.1548	13.5007	5.33749	14.7392	10.7049	15.7106	22.1708	5.03627	2
ENSG00000160886	LY6K	lymphocyte antigen 6 complex, locus K [Source:HGNC Symbol;Acc:24225]	protein_coding	13.379	4.10742	2.28104	1.17158	1.45565	0.515339	0.618074	0.393191	0.177392	0.027923	2
ENSG00000160888	IER2	immediate early response 2 [Source:HGNC Symbol;Acc:28871]	protein_coding	90.5156	57.7264	127.249	109.381	56.9235	90.1503	42.54	36.2869	43.5814	36.1009	2
ENSG00000162630	B3GALT2	UDP-Gal:betaGlcNAc beta 1,3-galactosyltransferase, polypeptide 2 [Source:HGNC Symbol;Acc:917]	protein_coding	0.416752	1.09074	11.4411	11.8758	1.10738	2.77808	3.91518	4.62727	2.69399	0.179748	2
ENSG00000162631	NTNG1	netrin G1 [Source:HGNC Symbol;Acc:23319]	protein_coding	0.486729	0.249949	0.872537	0.947274	0.303918	0.171405	0.166461	0.0692894	0.00558906	0.00818796	2
ENSG00000162817	C1orf115	chromosome 1 open reading frame 115 [Source:HGNC Symbol;Acc:25873]	protein_coding	13.692	24.0928	0.764409	0.713635	0.675863	0.573897	0.597866	0.27664	0.260577	0.522435	2
ENSG00000162849	KIF26B	kinesin family member 26B [Source:HGNC Symbol;Acc:25484]	protein_coding	2.51043	4.41979	3.07388	3.66281	0.814753	0.185828	0.123559	0.0957309	0.091083	0.0835242	2
ENSG00000163660	CCNL1	cyclin L1 [Source:HGNC Symbol;Acc:20569]	protein_coding	35.3305	30.4727	31.585	42.2561	15.8481	28.786	14.2663	14.0014	13.1309	15.4229	2
ENSG00000163739	CXCL1	chemokine (C-X-C motif) ligand 1 (melanoma growth stimulating activity, alpha) [Source:HGNC Symbol;Acc:4602]	protein_coding	8.62608	1.86757	1.18406	0.484312	0.195375	0.296206	0.0496496	0.0563997	0.0361306	0.00823274	2
ENSG00000163874	ZC3H12A	zinc finger CCCH-type containing 12A [Source:HGNC Symbol;Acc:26259]	protein_coding	5.52789	3.80667	5.37077	6.43662	2.20624	5.55224	3.70365	3.85471	3.22167	2.75921	2
ENSG00000164241	C5orf63	chromosome 5 open reading frame 63 [Source:HGNC Symbol;Acc:40051]	protein_coding	0.283819	0.267687	0.103449	0.116048	0.11796	0.132645	0.0866163	0.053092	0.0347761	0.0195651	2
ENSG00000164330	EBF1	early B-cell factor 1 [Source:HGNC Symbol;Acc:3126]	protein_coding	0.928756	1.20993	0.459829	0.638574	0.588353	0.394891	0.280336	0.406673	0.561504	0.947796	2
ENSG00000164649	CDCA7L	cell division cycle associated 7-like [Source:HGNC Symbol;Acc:30777]	protein_coding	9.89938	6.61975	4.48668	5.23367	4.31471	5.39267	5.69179	5.59157	3.31354	2.29552	2
ENSG00000165030	NFIL3	nuclear factor, interleukin 3 regulated [Source:HGNC Symbol;Acc:7787]	protein_coding	32.1949	16.5981	23.8608	24.7179	12.2853	30.4827	18.3163	15.0076	16.5605	14.6059	2
ENSG00000166106	ADAMTS15	ADAM metallopeptidase with thrombospondin type 1 motif, 15 [Source:HGNC Symbol;Acc:16305]	protein_coding	7.44175	6.82222	0.814565	0.917117	0.949342	1.68489	1.15935	1.1374	1.67525	0.550787	2
ENSG00000166441	RPL27A	ribosomal protein L27a [Source:HGNC Symbol;Acc:10329]	protein_coding	73.022	79.4247	109.158	66.1461	32.0391	81.0796	73.7145	72.1222	92.4667	45.8384	2
ENSG00000166825	ANPEP	alanyl (membrane) aminopeptidase [Source:HGNC Symbol;Acc:500]	protein_coding	217.319	134.075	85.4719	83.5415	59.1652	41.8251	38.4715	36.7397	31.1149	19.4288	2
ENSG00000167157	PRRX2	paired related homeobox 2 [Source:HGNC Symbol;Acc:21338]	protein_coding	47.8704	29.4691	42.1964	26.158	18.2409	8.32343	7.43932	10.7189	12.6251	4.25242	2
ENSG00000167874	TMEM88	transmembrane protein 88 [Source:HGNC Symbol;Acc:32371]	protein_coding	1.07496	0.790301	1.22714	1.29757	0.520359	2.02199	0.615078	0.554411	1.1763	0.459287	2
ENSG00000168961	LGALS9	lectin, galactoside-binding, soluble, 9 [Source:HGNC Symbol;Acc:6570]	protein_coding	0.909151	0.444124	0.338363	0.207607	0.0998171	0.28618	0.297085	0.302067	0.201638	0.0924387	2
ENSG00000169071	ROR2	receptor tyrosine kinase-like orphan receptor 2 [Source:HGNC Symbol;Acc:10257]	protein_coding	5.75314	6.35021	1.23541	1.2455	0.184281	1.39556	0.92837	0.346429	0.276874	0.0626722	2
ENSG00000169594	BNC1	basonuclin 1 [Source:HGNC Symbol;Acc:1081]	protein_coding	1.45469	0.870483	1.1114	1.06233	0.314318	0.342145	0.271255	0.139353	0.0595665	0.0383637	2
ENSG00000170345	FOS	FBJ murine osteosarcoma viral oncogene homolog [Source:HGNC Symbol;Acc:3796]	protein_coding	147.913	81.8025	377.091	312.546	85.101	189.499	73.0726	33.8941	67.8724	65.8763	2
ENSG00000170379	FAM115C	family with sequence similarity 115, member C [Source:HGNC Symbol;Acc:26878]	protein_coding	2.96059	2.00962	0.735297	0.867021	1.59116	0.874396	1.07821	0.827116	0.500852	1.38852	2
ENSG00000170500	LONRF2	LON peptidase N-terminal domain and ring finger 2 [Source:HGNC Symbol;Acc:24788]	protein_coding	0.258409	0.150645	0.0241159	0.0189509	0.147082	0.026698	0.0277751	0.0392178	0.0431801	0.110591	2
ENSG00000170801	HTRA3	HtrA serine peptidase 3 [Source:HGNC Symbol;Acc:30406]	protein_coding	1.06021	1.56381	4.48537	3.60831	2.02338	2.38309	2.87492	3.14948	1.41943	0.243511	2
ENSG00000171223	JUNB	jun B proto-oncogene [Source:HGNC Symbol;Acc:6205]	protein_coding	154.316	98.7151	373.777	319.629	84.9322	142.211	55.8864	45.2212	56.1382	75.1562	2
ENSG00000171345	KRT19	keratin 19 [Source:HGNC Symbol;Acc:6436]	protein_coding	80.8765	79.0188	78.7546	43.2395	36.0849	4.52285	4.49194	2.22346	0.69834	0.675209	2
ENSG00000173421	CCDC36	coiled-coil domain containing 36 [Source:HGNC Symbol;Acc:27945]	protein_coding	0.710912	0.695548	0.29984	0.380156	0.301696	0.299034	0.208909	0.152033	0.116028	0.0789757	2
ENSG00000173848	NET1	neuroepithelial cell transforming 1 [Source:HGNC Symbol;Acc:14592]	protein_coding	19.5021	10.717	5.80729	4.78595	4.98639	5.19626	5.24309	4.99269	2.51105	2.21983	2
ENSG00000174576	NPAS4	neuronal PAS domain protein 4 [Source:HGNC Symbol;Acc:18983]	protein_coding	0.237249	0.267573	0.284543	0.333588	0.0164127	0.239458	0.121821	0.219423	0.0594183	0.0701518	2
ENSG00000174640	SLCO2A1	solute carrier organic anion transporter family, member 2A1 [Source:HGNC Symbol;Acc:10955]	protein_coding	1.34208	0.505544	0.0126708	0.011234	0.0150255	0.0997985	0.097942	0.0345737	0.0731711	0.691485	2
ENSG00000175084	DES	desmin [Source:HGNC Symbol;Acc:2770]	protein_coding	1.12811	1.3221	0.26222	0.204056	0.210234	0.859514	0.65367	0.290498	0.175777	0.193302	2
ENSG00000175356	SCUBE2	signal peptide, CUB domain, EGF-like 2 [Source:HGNC Symbol;Acc:30425]	protein_coding	0.248948	0.385972	0.601237	0.769436	0.3777	0.35633	0.292913	0.376962	0.465016	0.149474	2
ENSG00000176170	SPHK1	sphingosine kinase 1 [Source:HGNC Symbol;Acc:11240]	protein_coding	39.415	16.9499	10.4045	5.04713	3.38962	3.8516	3.48167	2.87963	1.47822	1.2535	2
ENSG00000176907	C8orf4	chromosome 8 open reading frame 4 [Source:HGNC Symbol;Acc:1357]	protein_coding	53.2174	39.6097	28.5696	29.7782	15.107	17.9086	5.24267	1.80007	2.91138	4.77305	2
ENSG00000177350	RPL13AP3	ribosomal protein L13a pseudogene 3 [Source:HGNC Symbol;Acc:23539]	pseudogene	1.14661	1.24224	1.83443	1.01275	0.452391	0.974353	0.738636	0.795867	1.28508	0.470409	2
ENSG00000177410	ZNFX1-AS1	ZNFX1 antisense RNA 1 [Source:HGNC Symbol;Acc:33101]	antisense	45.1041	54.0251	101.652	57.8679	28.7869	58.8211	48.8133	50.9563	79.3523	32.5029	2
ENSG00000177426	TGIF1	TGFB-induced factor homeobox 1 [Source:HGNC Symbol;Acc:11776]	protein_coding	9.19089	5.55288	7.92676	8.93067	4.29619	10.385	5.0097	3.70392	7.52276	3.99298	2
ENSG00000178726	THBD	thrombomodulin [Source:HGNC Symbol;Acc:11784]	protein_coding	0.414933	0.102515	0.144272	0.116211	0.0408575	0.120703	0.0410168	0.029384	0.021381	0.292503	2
ENSG00000179094	PER1	period homolog 1 (Drosophila) [Source:HGNC Symbol;Acc:8845]	protein_coding	7.7633	3.19558	8.08427	9.98689	1.82187	7.27929	2.76195	2.49161	2.83187	2.79401	2
ENSG00000179294	C17orf96	chromosome 17 open reading frame 96 [Source:HGNC Symbol;Acc:34493]	protein_coding	1.67071	1.36393	0.99886	0.7473	1.50236	0.158526	0.159264	0.152543	0.194665	0.425282	2
ENSG00000179348	GATA2	GATA binding protein 2 [Source:HGNC Symbol;Acc:4171]	protein_coding	24.6838	16.0296	5.38734	4.88394	4.88481	1.63189	1.68074	0.99889	0.445277	0.170717	2
ENSG00000179388	EGR3	early growth response 3 [Source:HGNC Symbol;Acc:3240]	protein_coding	2.32714	1.85735	3.12286	5.0753	0.720146	2.05219	0.16772	0.175884	0.174501	0.223857	2
ENSG00000180353	HCLS1	hematopoietic cell-specific Lyn substrate 1 [Source:HGNC Symbol;Acc:4844]	protein_coding	1.37502	1.20188	0.889326	0.778508	0.548716	0.129932	0.118999	0.0911208	0.0419603	0.0326324	2
ENSG00000182492	BGN	biglycan [Source:HGNC Symbol;Acc:1044]	protein_coding	187.556	181.07	92.479	78.2193	13.0369	81.6129	93.862	121.514	92.584	30.7878	2
ENSG00000182836	PLCXD3	phosphatidylinositol-specific phospholipase C, X domain containing 3 [Source:HGNC Symbol;Acc:31822]	protein_coding	0.426308	0.262339	0.0149465	0.0174788	0.19871	0.00918068	0.014299	0.0327573	0.0324587	0.049984	2
ENSG00000183044	ABAT	4-aminobutyrate aminotransferase [Source:HGNC Symbol;Acc:23]	protein_coding	4.11957	5.27196	1.51051	2.00126	2.14429	1.30294	1.40501	1.12991	1.11631	2.58667	2
ENSG00000183807	FAM162B	family with sequence similarity 162, member B [Source:HGNC Symbol;Acc:21549]	protein_coding	8.69171	6.42998	7.56188	5.45087	3.8467	4.08871	3.94263	5.37168	5.95675	0.941535	2
ENSG00000184307	ZDHHC23	zinc finger, DHHC-type containing 23 [Source:HGNC Symbol;Acc:28654]	protein_coding	1.34264	1.28336	0.550843	0.666888	0.91655	0.17309	0.157662	0.212523	0.260399	0.446935	2
ENSG00000184588	PDE4B	phosphodiesterase 4B, cAMP-specific [Source:HGNC Symbol;Acc:8781]	protein_coding	2.6275	1.25743	0.997413	1.62505	1.19532	0.886969	0.686246	0.366129	0.647803	0.191958	2
ENSG00000184635	ZNF93	zinc finger protein 93 [Source:HGNC Symbol;Acc:13169]	protein_coding	1.2234	0.994152	1.0997	1.30538	0.55417	0.723014	0.787159	1.23339	0.589489	0.619039	2
ENSG00000184995	IFNE	interferon, epsilon [Source:HGNC Symbol;Acc:18163]	protein_coding	1.69948	1.51725	0.594579	0.871512	0.602439	0.784582	0.962905	0.774258	0.474255	1.51442	2
ENSG00000185044	BX004987.4		lincRNA	0.420968	0.500397	0.171315	0.175159	0.356141	0.115861	0.129364	0.121691	0.166959	0.374189	2
ENSG00000185633	NDUFA4L2	NADH dehydrogenase (ubiquinone) 1 alpha subcomplex, 4-like 2 [Source:HGNC Symbol;Acc:29836]	protein_coding	0.23409	0.777938	1.25929	0.990055	0.333184	0.511955	0.334241	0.632169	1.08338	0.109962	2
ENSG00000185745	IFIT1	interferon-induced protein with tetratricopeptide repeats 1 [Source:HGNC Symbol;Acc:5407]	protein_coding	16.7919	17.4793	20.3146	17.3626	4.21807	3.44944	2.64376	2.5799	3.04448	1.6756	2
ENSG00000185760	KCNQ5	potassium voltage-gated channel, KQT-like subfamily, member 5 [Source:HGNC Symbol;Acc:6299]	protein_coding	2.72789	1.27309	0.802852	0.782979	0.131381	0.562597	0.57597	0.635544	0.130416	0.550943	2
ENSG00000187193	MT1X	metallothionein 1X [Source:HGNC Symbol;Acc:7405]	protein_coding	2.01979	0.976937	1.07283	0.562827	0.428479	0.552637	0.52504	0.526961	0.649633	1.53982	2
ENSG00000187634	SAMD11	sterile alpha motif domain containing 11 [Source:HGNC Symbol;Acc:28706]	protein_coding	0.525405	0.173174	0.560272	0.550311	0.0907385	0.327189	0.278812	0.472882	0.629726	0.179931	2
ENSG00000188158	NHS	Nance-Horan syndrome (congenital cataracts and dental anomalies) [Source:HGNC Symbol;Acc:7820]	protein_coding	5.2129	2.97862	0.970449	1.2232	0.997711	0.922366	0.586767	0.402882	0.243104	0.27007	2
ENSG00000188396	TCTEX1D4	Tctex1 domain containing 4 [Source:HGNC Symbol;Acc:32315]	protein_coding	2.18225	2.21842	1.13361	1.58399	0.832324	0.850609	1.02856	1.2775	1.33989	2.07203	2
ENSG00000189343	RPS2P46	ribosomal protein S2 pseudogene 46 [Source:HGNC Symbol;Acc:35839]	pseudogene	25.6385	23.0748	26.0157	17.3877	7.33981	17.6448	17.8366	16.7573	20.1635	8.19475	2
ENSG00000197083	ZNF300P1	zinc finger protein 300 pseudogene 1 [Source:HGNC Symbol;Acc:27032]	pseudogene	0.568996	0.610199	0.136789	0.167083	0.106702	0.209474	0.196027	0.295518	0.307895	0.0330345	2
ENSG00000197935	ZNF311	zinc finger protein 311 [Source:HGNC Symbol;Acc:13847]	protein_coding	0.63454	0.501758	0.422622	0.515223	0.236581	0.260864	0.161439	0.193262	0.157431	0.057304	2
ENSG00000198028	ZNF560	zinc finger protein 560 [Source:HGNC Symbol;Acc:26484]	protein_coding	1.0836	1.11613	1.08555	1.15757	0.429178	0.685252	0.528832	0.482603	0.566675	0.315991	2
ENSG00000198342	ZNF442	zinc finger protein 442 [Source:HGNC Symbol;Acc:20877]	protein_coding	0.350529	0.287013	0.330063	0.386473	0.164941	0.621505	0.233477	0.28385	0.23623	0.192687	2
ENSG00000198680	TUSC1	tumor suppressor candidate 1 [Source:HGNC Symbol;Acc:31010]	protein_coding	3.60953	3.12799	7.15679	4.8177	3.94595	2.91183	2.69159	2.13894	1.93779	1.04927	2
ENSG00000198865	CCDC152	coiled-coil domain containing 152 [Source:HGNC Symbol;Acc:34438]	protein_coding	2.49639	1.21808	0.128358	0.100968	0.0739054	0.556888	0.446671	0.234796	0.0514779	0.0270667	2
ENSG00000198929	NOS1AP	nitric oxide synthase 1 (neuronal) adaptor protein [Source:HGNC Symbol;Acc:16859]	protein_coding	0.339452	0.350056	0.0767902	0.166237	0.239634	0.0376895	0.0294826	0.0694048	0.0263888	0.13922	2
ENSG00000198959	TGM2	transglutaminase 2 (C polypeptide, protein-glutamine-gamma-glutamyltransferase) [Source:HGNC Symbol;Acc:11778]	protein_coding	128.489	141.463	38.9452	47.254	14.7377	33.9891	35.9849	18.8154	13.8688	78.7106	2
ENSG00000203706	SERTAD4-AS1	SERTAD4 antisense RNA 1 [Source:HGNC Symbol;Acc:32019]	protein_coding	6.24888	5.60756	14.1694	8.37515	5.60051	0.708039	1.06003	1.24774	1.48454	3.50046	2
ENSG00000203805	PPAPDC1A	phosphatidic acid phosphatase type 2 domain containing 1A [Source:HGNC Symbol;Acc:23531]	protein_coding	1.34516	0.623564	0.849761	0.569957	0.300489	0.103287	0.0973553	0.04897	0.00852699	0.00385206	2
ENSG00000204052	LRRC73	leucine rich repeat containing 73 [Source:HGNC Symbol;Acc:21375]	protein_coding	0.320192	0.255499	0.646161	0.271517	0.233966	0.156352	0.127075	0.210386	0.399578	0.402356	2
ENSG00000204131	NHSL2	NHS-like 2 [Source:HGNC Symbol;Acc:33737]	protein_coding	1.71105	0.947569	0.435661	0.403028	0.167839	0.247005	0.166936	0.232798	0.0672777	0.127385	2
ENSG00000204444	APOM	apolipoprotein M [Source:HGNC Symbol;Acc:13916]	protein_coding	1.24746	0.977747	1.16613	0.732985	0.525101	0.90704	0.877274	0.778288	1.09188	0.521767	2
ENSG00000205246	RPSAP58	ribosomal protein SA pseudogene 58 [Source:HGNC Symbol;Acc:36809]	protein_coding	11.9486	10.719	12.2666	8.29844	3.65466	4.84588	4.58818	4.58152	5.32413	2.03651	2
ENSG00000205277	MUC12	mucin 12, cell surface associated [Source:HGNC Symbol;Acc:7510]	protein_coding	0.12126	0.0467966	0.131614	0.0738161	0.107102	0.0897293	0.0730748	0.0623308	0.072996	0.0180655	2
ENSG00000206190	ATP10A	ATPase, class V, type 10A [Source:HGNC Symbol;Acc:13542]	protein_coding	4.94713	4.43452	5.95838	6.36526	2.82047	3.02288	3.78793	5.48619	3.53976	6.07529	2
ENSG00000206337	HCP5	HLA complex P5 (non-protein coding) [Source:HGNC Symbol;Acc:21659]	processed_transcript	0.621316	1.20105	0.414257	0.52532	0.51764	0.159403	0.116755	0.137821	0.183552	0.497254	2
ENSG00000209582	SNORA48	small nucleolar RNA, H/ACA box 48 [Source:HGNC Symbol;Acc:32641]	snoRNA	16.2217	16.1871	7.48986	8.75024	3.89198	14.4776	9.04212	9.97481	6.41263	4.23445	2
ENSG00000212452	SNORD69	small nucleolar RNA, C/D box 69 [Source:HGNC Symbol;Acc:32730]	snoRNA	9.36887	3.84855	4.8264	4.66267	2.73203	8.59226	2.68977	3.6536	4.32348	1.99898	2
ENSG00000213442	RPL18AP3	ribosomal protein L18a pseudogene 3 [Source:HGNC Symbol;Acc:31387]	pseudogene	102.118	102.03	133.776	91.4246	40.5118	86.4524	83.1176	84.0145	105.65	49.1615	2
ENSG00000213917	AC008279.1		pseudogene	1.52443	1.4264	1.95016	1.02966	0.498986	1.47905	1.40106	1.37595	1.71177	0.753245	2
ENSG00000216775	RP1-152L7.5		pseudogene	13.6297	10.4526	2.61358	4.4382	3.09557	2.7032	4.20732	4.97474	1.08247	1.53094	2
ENSG00000216866	RPS2P55	ribosomal protein S2 pseudogene 55 [Source:HGNC Symbol;Acc:36140]	pseudogene	1.92896	1.96232	2.14568	1.35414	0.420379	1.7308	1.68896	1.97511	2.11834	0.788167	2
ENSG00000220472	RP11-69L16.5		pseudogene	37.8259	36.7461	42.3444	26.9728	14.5139	32.7685	29.6049	28.6858	34.0994	15.9339	2
ENSG00000222937	SNORD63	Small nucleolar RNA SNORD63 [Source:RFAM;Acc:RF00154]	snoRNA	16.6787	7.41323	8.48478	16.7331	4.42013	19.2946	6.18544	5.17312	9.77218	4.59268	2
ENSG00000223865	HLA-DPB1	major histocompatibility complex, class II, DP beta 1 [Source:HGNC Symbol;Acc:4940]	protein_coding	3.59083	2.85927	1.49723	1.02226	1.45661	2.17847	1.93189	1.27646	0.281757	0.0438668	2
ENSG00000223877	RP11-2F9.3		pseudogene	7.36858	7.599	11.2087	6.10625	3.05363	7.44745	6.68162	6.12879	8.43073	3.57409	2
ENSG00000225200	AB019441.29		pseudogene	43.0873	43.9716	68.5038	40.9126	19.5061	44.9425	38.5103	39.9538	52.0978	23.0004	2
ENSG00000225783	MIAT	myocardial infarction associated transcript (non-protein coding) [Source:HGNC Symbol;Acc:33425]	lincRNA	1.70584	3.16095	1.04096	1.15978	1.39511	2.42192	1.82211	1.70492	1.45337	1.16343	2
ENSG00000225968	ELFN1	extracellular leucine-rich repeat and fibronectin type III domain containing 1 [Source:HGNC Symbol;Acc:33154]	protein_coding	0.73579	1.30729	2.27965	2.26074	0.766082	0.715554	0.501564	0.844361	0.268285	0.113665	2
ENSG00000227331	AC005042.2		pseudogene	0.575349	0.536127	0.536852	0.684422	0.154535	0.411836	0.097877	0.0743897	0.0685082	0.0527883	2
ENSG00000228149	RPL3P1	ribosomal protein L3 pseudogene 1 [Source:HGNC Symbol;Acc:10352]	pseudogene	2.20365	2.1501	1.95777	1.79845	1.07103	1.96555	1.80635	1.57261	2.04243	1.0137	2
ENSG00000228205	RP11-778D9.4		pseudogene	37.853	36.7161	44.4104	26.8043	13.308	34.3361	31.1164	29.3187	37.7062	17.5245	2
ENSG00000228649	AC005682.5		lincRNA	6.22524	3.70802	2.57353	2.98435	1.44575	0.748955	0.559137	0.380254	0.187133	0.218123	2
ENSG00000229119	CTB-63M22.1		pseudogene	367.022	352.581	516.462	264.376	123.239	316.697	296.242	298.921	383.101	172.407	2
ENSG00000230629	RPS23P8	ribosomal protein S23 pseudogene 8 [Source:HGNC Symbol;Acc:35982]	pseudogene	258.081	262.564	405.685	232.883	125.947	251.653	213.174	218.649	284.104	118.075	2
ENSG00000230918	AC008063.2		antisense	0.650556	3.31069	1.27549	1.58894	0.645359	0.60862	0.554884	0.468814	1.10591	1.6616	2
ENSG00000230979	AC079250.1		pseudogene	38.7414	40.3917	51.4812	38.2746	16.6182	34.2915	31.7516	33.7793	43.397	18.1523	2
ENSG00000231389	HLA-DPA1	major histocompatibility complex, class II, DP alpha 1 [Source:HGNC Symbol;Acc:4938]	protein_coding	0.884813	1.27299	0.147662	0.175397	0.697228	0.375536	0.317027	0.181863	0.0720455	0.0358646	2
ENSG00000231684	RP11-416K24.2		pseudogene	14.6735	16.0674	33.0717	25.8128	16.0193	21.3457	16.189	17.2419	25.073	11.5346	2
ENSG00000235750	KIAA0040	KIAA0040 [Source:HGNC Symbol;Acc:28950]	protein_coding	0.233657	0.232401	0.0561532	0.040494	0.115914	0.0292688	0.0218206	0.00924596	0.0182379	0.236577	2
ENSG00000236552	RPL13AP5	ribosomal protein L13a pseudogene 5 [Source:HGNC Symbol;Acc:23736]	pseudogene	46.4799	51.2326	66.121	39.4142	19.549	47.0845	40.2143	40.6352	56.8408	27.2339	2
ENSG00000236841	AC007750.5		antisense	0.480894	0.459131	0.598595	0.593166	0.174366	0.339518	0.321111	0.347142	0.217753	0.128884	2
ENSG00000237214	RP11-12M9.3		pseudogene	93.4342	88.5359	119.87	74.6185	41.5514	83.9526	72.0142	76.3573	91.9386	45.8613	2
ENSG00000237424	FOXD2-AS1	FOXD2 antisense RNA 1 [Source:HGNC Symbol;Acc:44256]	antisense	0.578935	0.484422	0.609467	0.584493	0.256723	0.384278	0.451168	0.529593	0.469974	0.188579	2
ENSG00000237506	RPSAP9	ribosomal protein SA pseudogene 9 [Source:HGNC Symbol;Acc:31463]	pseudogene	10.4115	8.1275	13.0671	6.84615	3.45795	9.59736	8.29002	8.50809	9.70259	3.64071	2
ENSG00000237892	KLF7-IT1	KLF7 intronic transcript 1 (non-protein coding) [Source:HGNC Symbol;Acc:41355]	sense_intronic	1.5072	1.44806	1.45525	2.34408	0.568407	1.76618	0.446922	0.635676	0.261585	0.659954	2
ENSG00000238273	AC012360.6		antisense	1.50135	1.52061	0.419931	0.741472	0.341929	0.911801	0.839912	0.667051	0.539441	1.47129	2
ENSG00000239246	RP11-464D20.2		pseudogene	10.5104	9.82065	13.147	7.49177	4.31738	9.77499	9.24302	10.0912	12.4939	5.51336	2
ENSG00000240342	RPS2P5	ribosomal protein S2 pseudogene 5 [Source:HGNC Symbol;Acc:31386]	pseudogene	15.9271	14.2194	16.7354	12.8654	5.26783	10.9658	11.0144	11.8679	11.494	5.05406	2
ENSG00000240376	RP11-36C20.1		pseudogene	38.9815	42.8025	58.709	35.5545	18.3526	41.0946	38.8989	36.6792	48.2294	23.5442	2
ENSG00000242411	CTD-2086L14.1		pseudogene	2.54859	2.45085	3.70283	2.39615	1.00257	2.70156	2.09964	2.26744	2.75391	1.21379	2
ENSG00000244161	FLNB-AS1	FLNB antisense RNA 1 [Source:HGNC Symbol;Acc:40239]	antisense	1.47511	1.04304	1.01186	1.34574	0.434991	1.00123	0.597103	0.880645	0.339419	0.585484	2
ENSG00000244300	RP11-475N22.4		lincRNA	4.13229	2.76357	1.21014	1.44996	1.22592	0.435922	0.445997	0.194634	0.0755686	0.0136226	2
ENSG00000244945	RP11-1379J22.2		antisense	0.607876	0.712841	1.0515	0.710347	0.26028	0.527995	0.454655	0.53138	0.494274	0.1947	2
ENSG00000245856	RP11-656E20.4		antisense	1.98383	1.39995	1.35788	2.4758	0.76818	1.81331	0.625324	0.632929	0.741302	0.899873	2
ENSG00000249669	MIR143HG	MIR143 host gene (non-protein coding) [Source:HGNC Symbol;Acc:42872]	lincRNA	1.39869	2.02724	1.85573	2.5778	1.09411	1.01658	0.835711	0.811698	0.2853	0.162181	2
ENSG00000250722	SEPP1	selenoprotein P, plasma, 1 [Source:HGNC Symbol;Acc:10751]	protein_coding	0.941912	2.19598	0.569644	0.751746	1.30559	0.49037	0.419958	0.15133	0.0989425	0.0873743	2
ENSG00000251348	HSPD1P11	heat shock 60kDa protein 1 (chaperonin) pseudogene 11 [Source:HGNC Symbol;Acc:35142]	pseudogene	2.71037	3.50214	4.2616	5.26868	1.1083	1.48369	1.14327	1.02842	0.616883	0.555817	2
ENSG00000253864	AC131025.8		lincRNA	0.388462	0.472982	0.473592	0.575256	0.11239	0.155936	0.179766	0.144379	0.0495631	0.0281421	2
ENSG00000253882	RP11-61L23.2		pseudogene	2.2151	1.42855	0.734198	0.791519	1.03528	0.796252	0.950726	0.646133	0.370506	1.18214	2
ENSG00000254510	RP11-867G23.10		lincRNA	0.759478	0.825067	1.15689	0.883603	0.158971	0.559619	0.375382	0.576381	0.300802	0.176849	2
ENSG00000254667	AP000783.1	Uncharacterized protein [Source:UniProtKB/TrEMBL;Acc:E9PS84]	protein_coding	5.9399	2.17117	1.23879	0.960158	1.05173	1.04889	0.954753	0.597822	0.201754	0.828688	2
ENSG00000255737	RP11-571M6.6	HCG2014417, isoform CRA_a; Uncharacterized protein; cDNA FLJ59598 [Source:UniProtKB/TrEMBL;Acc:B7Z718]	protein_coding	3.80892	3.17892	3.88879	2.64674	1.72115	2.94378	2.72507	2.97712	3.38303	1.51188	2
ENSG00000256073	C21orf119	chromosome 21 open reading frame 119 [Source:HGNC Symbol;Acc:23128]	protein_coding	3.47196	2.08816	3.07912	1.63117	1.60603	2.06476	1.70519	1.52915	1.33192	0.716913	2
ENSG00000256671	LIMS3L	LIM and senescent cell antigen-like domains 3-like [Source:HGNC Symbol;Acc:39941]	protein_coding	1.82427	0.537686	1.38249	1.33135	0.119324	0.404191	0.155115	0.0736434	0.0609057	0.103978	2
ENSG00000256977	LIMS3	LIM and senescent cell antigen-like-containing domain protein 3 [Source:UniProtKB/Swiss-Prot;Acc:P0CW19]	protein_coding	2.00493	0.479709	1.26088	1.13607	0.142802	0.522622	0.221462	0.080692	0.0749907	0.101463	2
ENSG00000257298	RP3-405J10.3		sense_intronic	0.849135	1.00659	0.564162	1.61567	0.388088	0.622706	0.245605	0.20719	0.172623	0.254491	2
ENSG00000259790	ANP32BP1	acidic (leucine-rich) nuclear phosphoprotein 32 family, member B pseudogene 1 [Source:HGNC Symbol;Acc:24267]	pseudogene	3.79282	3.07115	3.12991	2.29528	1.22879	2.64991	2.30681	2.746	2.4961	1.15705	2
ENSG00000259796	RP11-355I22.7		sense_overlapping	1.98503	1.70736	0.723579	0.611731	0.839468	1.06177	0.928228	0.474195	0.430382	1.62864	2
ENSG00000259884	RP11-1100L3.8		lincRNA	13.0228	3.62008	13.0684	11.5087	0.579586	14.1281	7.34793	1.34935	1.2507	4.82764	2
ENSG00000260727	RP11-368N21.2		pseudogene	1.30797	1.17067	2.32235	2.47489	0.71479	0.996534	0.793496	1.5775	1.50124	0.207157	2
ENSG00000261026	CTD-3247F14.2		sense_overlapping	0.0518122	0.0683037	0.0411281	0.109907	0.00456914	0.103994	0.0082847	0.00170417	0.00220452	0.00617899	2
ENSG00000261220	RP11-629O1.2		antisense	1.93627	1.59936	1.72306	1.02447	0.416858	1.33234	1.59849	1.35233	1.61763	0.512243	2
ENSG00000261490	RP11-448G15.3		sense_overlapping	4.04569	2.88265	4.0558	5.06221	0.804477	3.80749	1.34403	1.69065	0.972955	1.21317	2
ENSG00000261639				0.310131	0.124431	0.290635	0.455294	0.236087	0.306481	0.222525	0.1484	0.150658	0.0935914	2
ENSG00000261786	RP4-555D20.2		lincRNA	8.85791	8.97153	2.75328	2.65626	2.3598	1.22641	1.02798	1.25491	0.379508	0.255928	2
ENSG00000001461	NIPAL3	NIPA-like domain containing 3 [Source:HGNC Symbol;Acc:25233]	protein_coding	10.636	15.3241	12.2259	18.0648	29.0672	13.7499	14.6266	15.2732	17.5895	35.7976	3
ENSG00000002745	WNT16	wingless-type MMTV integration site family, member 16 [Source:HGNC Symbol;Acc:16267]	protein_coding	0.0577838	0.0642748	0.316105	0.364883	0.305556	2.58635	4.67537	6.69744	14.2341	72.1058	3
ENSG00000002933	TMEM176A	transmembrane protein 176A [Source:HGNC Symbol;Acc:24930]	protein_coding	0.0196054	0.868338	2.80107	2.26913	13.8597	8.43213	7.79198	1.46714	5.41708	14.5974	3
ENSG00000004799	PDK4	pyruvate dehydrogenase kinase, isozyme 4 [Source:HGNC Symbol;Acc:8812]	protein_coding	0.0885528	0.0969711	0.18698	0.218649	0.413437	0.0290723	0.019765	0	0.0339871	3.21517	3
ENSG00000005884	ITGA3	integrin, alpha 3 (antigen CD49C, alpha 3 subunit of VLA-3 receptor) [Source:HGNC Symbol;Acc:6139]	protein_coding	52.2859	35.3028	14.03	15.682	23.9669	50.9921	58.5581	56.3405	41.6042	129.226	3
ENSG00000028277	POU2F2	POU class 2 homeobox 2 [Source:HGNC Symbol;Acc:9213]	protein_coding	1.84636	1.83001	0.658901	0.90686	1.34922	1.07774	1.38563	1.33077	0.801464	1.98265	3
ENSG00000030582	GRN	granulin [Source:HGNC Symbol;Acc:4601]	protein_coding	96.1248	153.957	179.092	190.372	224.572	125.255	113.11	114.366	172.257	292.197	3
ENSG00000041353	RAB27B	RAB27B, member RAS oncogene family [Source:HGNC Symbol;Acc:9767]	protein_coding	0.215649	0.175443	0.164317	0.178343	0.685929	0.843557	0.456347	0.387845	0.825076	5.58076	3
ENSG00000042062	FAM65C	family with sequence similarity 65, member C [Source:HGNC Symbol;Acc:16168]	protein_coding	1.12054	3.65001	0.359989	0.526709	0.952961	24.0434	16.9609	7.38881	17.636	39.0027	3
ENSG00000042832	TG	thyroglobulin [Source:HGNC Symbol;Acc:11764]	protein_coding	0.0160564	0.0386145	0.0254779	0.0336016	0.0885265	0.0441656	0.0490793	0.0579425	0.0703362	0.208962	3
ENSG00000047597	XK	X-linked Kx blood group (McLeod syndrome) [Source:HGNC Symbol;Acc:12811]	protein_coding	0.0053277	0.00581216	0.00511239	0.00169269	0.0471566	0.0650538	0.037107	0.0524409	0.128885	0.225509	3
ENSG00000048392	RRM2B	ribonucleotide reductase M2 B (TP53 inducible) [Source:HGNC Symbol;Acc:17296]	protein_coding	10.816	13.163	11.1682	16.6764	30.3933	12.8375	11.7463	11.5131	15.1225	32.2749	3
ENSG00000050165	DKK3	dickkopf 3 homolog (Xenopus laevis) [Source:HGNC Symbol;Acc:2893]	protein_coding	98.1758	135.185	161.212	185.896	277.345	322.761	335.263	343.601	452.967	872.999	3
ENSG00000054392	HHAT	hedgehog acyltransferase [Source:HGNC Symbol;Acc:18270]	protein_coding	1.1837	1.94893	2.13831	2.80343	2.58748	1.06659	1.04132	1.16728	1.96237	3.76527	3
ENSG00000054983	GALC	galactosylceramidase [Source:HGNC Symbol;Acc:4115]	protein_coding	2.57113	2.94545	4.22754	5.28124	9.24491	4.25404	4.48838	4.17413	6.81245	8.61987	3
ENSG00000058335	RASGRF1	Ras protein-specific guanine nucleotide-releasing factor 1 [Source:HGNC Symbol;Acc:9875]	protein_coding	0.0215544	0.0389869	0.0350534	0.0391944	0.06944	0.0775142	0.0884836	0.0980114	0.13063	0.184023	3
ENSG00000063854	HAGH	hydroxyacylglutathione hydrolase [Source:HGNC Symbol;Acc:4805]	protein_coding	2.82209	3.55712	5.80801	4.75852	6.23865	4.27878	4.44769	3.59	6.16613	9.04904	3
ENSG00000064201	TSPAN32	tetraspanin 32 [Source:HGNC Symbol;Acc:13410]	protein_coding	0.0731657	0.125847	0.0902904	0.16786	0.204257	0.0823528	0.0867949	0.103089	0.0874167	0.217755	3
ENSG00000064687	ABCA7	ATP-binding cassette, sub-family A (ABC1), member 7 [Source:HGNC Symbol;Acc:37]	protein_coding	1.00293	1.06747	0.632891	1.05837	2.44618	0.978656	0.830967	0.878911	1.03415	4.02453	3
ENSG00000064886	CHI3L2	chitinase 3-like 2 [Source:HGNC Symbol;Acc:1933]	protein_coding	0.0594088	0.146914	0.017256	0.043466	0.107655	0.054412	0.0238496	0.00928099	0.0247751	0.254804	3
ENSG00000065325	GLP2R	glucagon-like peptide 2 receptor [Source:HGNC Symbol;Acc:4325]	protein_coding	0.00672842	0.0162755	0.00177062	0.0102111	0.0999093	0.012115	0.0153003	0.0241026	0.0429193	0.143314	3
ENSG00000067141	NEO1	neogenin 1 [Source:HGNC Symbol;Acc:7754]	protein_coding	0.831968	1.40674	2.0291	2.84337	5.92043	23.1526	29.6455	38.0035	39.171	78.8229	3
ENSG00000072041	SLC6A15	solute carrier family 6 (neutral amino acid transporter), member 15 [Source:HGNC Symbol;Acc:13621]	protein_coding	0.670465	0.326229	0.0191181	0.018934	0.0679274	0.833332	0.457924	0.46202	1.28558	4.95361	3
ENSG00000072954	TMEM38A	transmembrane protein 38A [Source:HGNC Symbol;Acc:28462]	protein_coding	0.782974	1.02348	0.517008	0.59262	1.28061	0.95099	0.864734	0.725284	0.981651	2.85645	3
ENSG00000073849	ST6GAL1	ST6 beta-galactosamide alpha-2,6-sialyltranferase 1 [Source:HGNC Symbol;Acc:10860]	protein_coding	0.303203	0.486356	0.0901438	0.139118	0.442315	0.505232	0.40435	0.588548	0.534358	1.10604	3
ENSG00000073910	FRY	furry homolog (Drosophila) [Source:HGNC Symbol;Acc:20367]	protein_coding	2.50419	5.42497	6.17553	8.58055	7.60489	5.05198	4.50087	4.796	5.93786	11.1578	3
ENSG00000077585	GPR137B	G protein-coupled receptor 137B [Source:HGNC Symbol;Acc:11862]	protein_coding	4.86561	7.82936	10.9501	11.4122	11.3151	7.71323	6.56853	6.41418	10.3206	15.46	3
ENSG00000079841	RIMS1	regulating synaptic membrane exocytosis 1 [Source:HGNC Symbol;Acc:17282]	protein_coding	0.0225892	0.0303215	0.0205379	0.032352	0.0820498	0.266003	0.309628	0.278276	0.259435	0.810186	3
ENSG00000081320	STK17B	serine/threonine kinase 17b [Source:HGNC Symbol;Acc:11396]	protein_coding	8.89011	11.7091	5.84834	7.52159	9.3568	14.7532	15.2997	13.9459	10.6041	27.9093	3
ENSG00000085465	OVGP1	oviductal glycoprotein 1, 120kDa [Source:HGNC Symbol;Acc:8524]	protein_coding	0.199668	0.600102	0.873878	1.065	0.725638	0.510383	0.353831	0.369842	0.616379	1.31012	3
ENSG00000085563	ABCB1	ATP-binding cassette, sub-family B (MDR/TAP), member 1 [Source:HGNC Symbol;Acc:40]	protein_coding	0.0193595	0.0199983	0.0234725	0.0339985	0.444254	0.326211	0.390828	0.827015	1.47874	1.43645	3
ENSG00000086696	HSD17B2	hydroxysteroid (17-beta) dehydrogenase 2 [Source:HGNC Symbol;Acc:5211]	protein_coding	0.0542388	0.104248	0.0854971	0.0530145	0.154637	5.04889	5.16534	2.40876	9.75668	14.0169	3
ENSG00000090530	LEPREL1	leprecan-like 1 [Source:HGNC Symbol;Acc:19317]	protein_coding	5.82663	3.33694	2.60727	2.84026	5.8805	15.7613	28.3069	24.0186	19.944	33.7925	3
ENSG00000090920	FCGBP	Fc fragment of IgG binding protein [Source:HGNC Symbol;Acc:13572]	protein_coding	0.00868209	0.0167278	0.00592978	0.0113105	0.0353376	0.0128934	0.0129488	0.00274857	0.00862315	0.0622394	3
ENSG00000092969	TGFB2	transforming growth factor, beta 2 [Source:HGNC Symbol;Acc:11768]	protein_coding	0.118322	0.177837	0.49249	0.711284	3.54381	3.31189	4.88852	7.64702	11.6545	23.8677	3
ENSG00000099139	PCSK5	proprotein convertase subtilisin/kexin type 5 [Source:HGNC Symbol;Acc:8747]	protein_coding	0.0841835	0.139034	0.15363	0.177033	1.07744	0.821853	0.899948	1.20483	1.87995	1.64448	3
ENSG00000099219	ERMP1	endoplasmic reticulum metallopeptidase 1 [Source:HGNC Symbol;Acc:23703]	protein_coding	4.71509	7.41674	4.34275	6.4036	14.5534	4.49703	3.85814	3.87259	4.62073	13.9668	3
ENSG00000100100	PIK3IP1	phosphoinositide-3-kinase interacting protein 1 [Source:HGNC Symbol;Acc:24942]	protein_coding	1.81278	3.9081	6.88407	9.60869	20.5278	7.21055	6.72708	6.07631	12.6278	23.0396	3
ENSG00000101439	CST3	cystatin C [Source:HGNC Symbol;Acc:2475]	protein_coding	33.6998	46.5045	79.7538	59.3166	80.7914	41.3277	40.8728	42.8348	63.2121	103.105	3
ENSG00000101670	LIPG	lipase, endothelial [Source:HGNC Symbol;Acc:6623]	protein_coding	0.141268	0.222162	0.0141831	0.0185881	0.18574	0.293209	0.278332	0.320532	0.323397	0.825225	3
ENSG00000102032	RENBP	renin binding protein [Source:HGNC Symbol;Acc:9959]	protein_coding	0.835108	1.72368	0.802708	0.907339	1.50713	0.838859	0.506812	0.333819	1.23351	1.91128	3
ENSG00000102057	KCND1	potassium voltage-gated channel, Shal-related subfamily, member 1 [Source:HGNC Symbol;Acc:6237]	protein_coding	1.46439	1.20893	0.520146	0.767453	1.75186	1.34459	1.17765	1.24621	0.659059	1.55035	3
ENSG00000102385	DRP2	dystrophin related protein 2 [Source:HGNC Symbol;Acc:3032]	protein_coding	0.119072	0.108169	0.0671629	0.0962399	0.203292	3.11024	3.48082	3.51683	2.9729	9.24859	3
ENSG00000102452	NALCN	sodium leak channel, non-selective [Source:HGNC Symbol;Acc:19082]	protein_coding	0.315381	0.545924	1.04158	1.43783	1.42698	0.634216	0.562276	0.742844	1.1277	1.97753	3
ENSG00000102996	MMP15	matrix metallopeptidase 15 (membrane-inserted) [Source:HGNC Symbol;Acc:7161]	protein_coding	0.459067	0.939183	0.71847	0.930936	1.61466	1.87061	1.61835	1.35457	2.35294	3.98402	3
ENSG00000103175	WFDC1	WAP four-disulfide core domain 1 [Source:HGNC Symbol;Acc:15466]	protein_coding	0.570474	2.00246	8.96064	6.74042	3.72656	6.09852	9.68572	8.4355	14.7744	17.1001	3
ENSG00000103316	CRYM	crystallin, mu [Source:HGNC Symbol;Acc:2418]	protein_coding	0.00755472	0.0131806	0.0360858	0.0395975	0.218013	0.234959	0.125134	0.0911269	0.537722	0.517673	3
ENSG00000103647	CORO2B	coronin, actin binding protein, 2B [Source:HGNC Symbol;Acc:2256]	protein_coding	7.72094	5.0418	1.54153	2.19272	1.3855	11.4331	10.6404	8.19703	6.29997	16.0189	3
ENSG00000103811	CTSH	cathepsin H [Source:HGNC Symbol;Acc:2535]	protein_coding	0.561531	1.11396	0.748369	0.588091	1.37294	1.09987	0.944769	0.85877	1.84965	3.43143	3
ENSG00000104043	ATP8B4	ATPase, class I, type 8B, member 4 [Source:HGNC Symbol;Acc:13536]	protein_coding	0.0876869	0.181149	0.0705545	0.108697	0.289599	0.0416911	0.061301	0.0584476	0.0689645	0.277048	3
ENSG00000104081	BMF	Bcl2 modifying factor [Source:HGNC Symbol;Acc:24132]	protein_coding	0.209483	0.523505	0.706503	0.6156	0.762887	1.5492	1.41472	1.30076	2.24048	5.1558	3
ENSG00000104368	PLAT	plasminogen activator, tissue [Source:HGNC Symbol;Acc:9051]	protein_coding	14.1573	9.22401	3.36345	3.9073	19.4916	174.891	115.778	32.0064	57.2062	150.645	3
ENSG00000104763	ASAH1	N-acylsphingosine amidohydrolase (acid ceramidase) 1 [Source:HGNC Symbol;Acc:735]	protein_coding	9.29195	16.0616	21.7943	28.0391	57.7735	17.8265	16.8321	15.5811	27.5069	53.3301	3
ENSG00000105696	TMEM59L	transmembrane protein 59-like [Source:HGNC Symbol;Acc:13237]	protein_coding	0.864653	1.03741	1.87418	1.21262	4.04122	5.31786	5.47889	5.61559	12.2612	11.426	3
ENSG00000105767	CADM4	cell adhesion molecule 4 [Source:HGNC Symbol;Acc:30825]	protein_coding	1.57405	3.2302	1.29619	1.44641	5.28876	5.06224	5.56174	5.35851	6.69784	10.7079	3
ENSG00000105825	TFPI2	tissue factor pathway inhibitor 2 [Source:HGNC Symbol;Acc:11761]	protein_coding	27.3129	15.5418	2.66085	2.54518	1.92712	15.0047	21.0245	5.7179	21.8784	34.1352	3
ENSG00000105967	TFEC	transcription factor EC [Source:HGNC Symbol;Acc:11754]	protein_coding	0.00220081	0	0.00541155	0.0124851	0.0258421	0.0107638	0.0159798	0.0168137	0.0379686	0.121369	3
ENSG00000106351	AGFG2	ArfGAP with FG repeats 2 [Source:HGNC Symbol;Acc:5177]	protein_coding	2.05434	1.53573	1.16962	1.06268	2.21354	1.26549	1.44969	1.52246	1.09503	2.41923	3
ENSG00000106565	TMEM176B	transmembrane protein 176B [Source:HGNC Symbol;Acc:29596]	protein_coding	0.0770535	2.03276	5.11417	4.66404	27.131	15.994	16.0996	3.01215	9.6583	28.1245	3
ENSG00000106772	PRUNE2	prune homolog 2 (Drosophila) [Source:HGNC Symbol;Acc:25209]	protein_coding	1.76319	2.60858	0.602918	0.856521	1.99761	2.0919	2.22981	1.83209	2.29112	5.99933	3
ENSG00000106780	MEGF9	multiple EGF-like-domains 9 [Source:HGNC Symbol;Acc:3234]	protein_coding	1.44727	2.59773	2.85035	3.80555	5.78453	9.67807	9.18337	7.16204	12.2552	26.3004	3
ENSG00000107554	DNMBP	dynamin binding protein [Source:HGNC Symbol;Acc:30373]	protein_coding	9.06556	6.62	3.24955	3.7012	5.34346	5.15493	5.6716	6.20235	4.26968	8.94505	3
ENSG00000107796	ACTA2	actin, alpha 2, smooth muscle, aorta [Source:HGNC Symbol;Acc:130]	protein_coding	17.7184	58.067	175.782	138.394	28.4176	39.3231	76.5906	145.245	71.9837	132.421	3
ENSG00000108370	RGS9	regulator of G-protein signaling 9 [Source:HGNC Symbol;Acc:10004]	protein_coding	0.349762	0.668013	0.377826	0.436762	0.706157	1.84831	1.86377	1.97075	3.23164	4.18398	3
ENSG00000108932	SLC16A6	solute carrier family 16, member 6 (monocarboxylic acid transporter 7) [Source:HGNC Symbol;Acc:10927]	protein_coding	0.176521	0.182607	0.185765	0.238071	1.02682	6.10075	6.34763	1.80312	12.2038	16.6019	3
ENSG00000110092	CCND1	cyclin D1 [Source:HGNC Symbol;Acc:1582]	protein_coding	166.728	190.283	119.37	190.972	481.03	302.519	349.065	289.822	205.023	693.065	3
ENSG00000110675	ELMOD1	ELMO/CED-12 domain containing 1 [Source:HGNC Symbol;Acc:25334]	protein_coding	0.0646722	0.0726295	0.122066	0.114582	0.251475	0.176874	0.20696	0.135565	0.117708	0.4089	3
ENSG00000110799	VWF	von Willebrand factor [Source:HGNC Symbol;Acc:12726]	protein_coding	0.0270629	0.0617212	0.035971	0.0398068	0.0904818	0.06531	0.0468336	0.0535237	0.103027	0.135558	3
ENSG00000110900	TSPAN11	tetraspanin 11 [Source:HGNC Symbol;Acc:30795]	protein_coding	0.277436	0.529047	0.223352	0.437435	0.436924	0.321872	0.207861	0.259327	0.435735	1.09045	3
ENSG00000111348	ARHGDIB	Rho GDP dissociation inhibitor (GDI) beta [Source:HGNC Symbol;Acc:679]	protein_coding	0.243351	0.266443	0.282833	0.187713	0.638587	0.937955	1.18136	1.37532	0.81575	1.64927	3
ENSG00000111728	ST8SIA1	ST8 alpha-N-acetyl-neuraminide alpha-2,8-sialyltransferase 1 [Source:HGNC Symbol;Acc:10869]	protein_coding	0.0188745	0.0320589	0.0376475	0.0709351	0.149676	0.0420679	0.0275476	0.0461053	0.0636869	0.193611	3
ENSG00000111859	NEDD9	neural precursor cell expressed, developmentally down-regulated 9 [Source:HGNC Symbol;Acc:7733]	protein_coding	1.63954	1.99671	4.48343	4.96155	6.65494	8.09895	8.34032	10.5456	6.18325	12.8349	3
ENSG00000111879	FAM184A	family with sequence similarity 184, member A [Source:HGNC Symbol;Acc:20991]	protein_coding	0.0207454	0.0050002	0.0232728	0.0270652	0.106409	0.040194	0.0255142	0.0326139	0.0202966	0.121673	3
ENSG00000112139	MDGA1	MAM domain containing glycosylphosphatidylinositol anchor 1 [Source:HGNC Symbol;Acc:19267]	protein_coding	0.451692	0.548044	0.467759	0.513535	0.923831	1.23011	1.29118	1.32819	0.923604	2.64262	3
ENSG00000112378	PERP	PERP, TP53 apoptosis effector [Source:HGNC Symbol;Acc:17637]	protein_coding	109.02	184.96	111.782	122.01	223.534	101.037	93.2812	75.9609	166.718	237.107	3
ENSG00000113070	HBEGF	heparin-binding EGF-like growth factor [Source:HGNC Symbol;Acc:3059]	protein_coding	2.79203	1.3367	1.51791	1.33161	2.27642	7.80021	5.85992	5.14859	4.52294	9.58342	3
ENSG00000113396	SLC27A6	solute carrier family 27 (fatty acid transporter), member 6 [Source:HGNC Symbol;Acc:11000]	protein_coding	0.00237623	0.0487308	0.24211	0.229053	0.227829	0.0670286	0.0697498	0.206493	0.800988	1.10773	3
ENSG00000113494	PRLR	prolactin receptor [Source:HGNC Symbol;Acc:9446]	protein_coding	0.027768	0.0384252	0.028083	0.0344763	0.130957	0.0612326	0.0764328	0.0868051	0.0678233	0.207884	3
ENSG00000114631	PODXL2	podocalyxin-like 2 [Source:HGNC Symbol;Acc:17936]	protein_coding	1.17443	1.09028	0.203978	0.184412	0.570193	0.968096	1.05994	0.561877	0.537142	1.50934	3
ENSG00000115084	SLC35F5	solute carrier family 35, member F5 [Source:HGNC Symbol;Acc:23617]	protein_coding	8.69492	11.0574	15.4751	19.0378	19.3077	11.7267	11.5262	9.9649	12.1199	24.9779	3
ENSG00000115339	GALNT3	UDP-N-acetyl-alpha-D-galactosamine:polypeptide N-acetylgalactosaminyltransferase 3 (GalNAc-T3) [Source:HGNC Symbol;Acc:4125]	protein_coding	0.211092	0.61927	0.824517	1.34438	1.80201	0.931164	1.00159	2.62881	2.72147	3.03315	3
ENSG00000115756	HPCAL1	hippocalcin-like 1 [Source:HGNC Symbol;Acc:5145]	protein_coding	7.9901	5.08019	3.20145	2.77513	3.84933	10.9442	10.3849	8.45331	8.65704	17.8748	3
ENSG00000116005	PCYOX1	prenylcysteine oxidase 1 [Source:HGNC Symbol;Acc:20588]	protein_coding	21.8301	37.516	32.3455	49.2853	87.5087	37.351	38.2977	38.9378	51.4121	86.0815	3
ENSG00000116661	FBXO2	F-box protein 2 [Source:HGNC Symbol;Acc:13581]	protein_coding	0.596469	1.49398	1.58071	1.41	6.68713	0.690042	0.489864	0.5748	1.43943	5.55097	3
ENSG00000116729	WLS	wntless homolog (Drosophila) [Source:HGNC Symbol;Acc:30238]	protein_coding	43.0603	39.729	12.4721	16.5277	36.0903	59.6395	63.63	59.2849	52.3573	135.573	3
ENSG00000119608	PROX2	prospero homeobox 2 [Source:HGNC Symbol;Acc:26715]	protein_coding	0.216664	0.353771	0.177944	0.279666	0.620712	0.190999	0.186953	0.174857	0.252603	0.551088	3
ENSG00000119655	NPC2	Niemann-Pick disease, type C2 [Source:HGNC Symbol;Acc:14537]	protein_coding	20.6533	28.0827	47.9624	41.938	57.1403	44.046	33.7376	33.5899	67.6179	76.269	3
ENSG00000119714	GPR68	G protein-coupled receptor 68 [Source:HGNC Symbol;Acc:4519]	protein_coding	0.0818625	0.133214	0.161834	0.185412	0.573853	3.03089	3.32785	2.19125	3.06831	6.65426	3
ENSG00000119900	OGFRL1	opioid growth factor receptor-like 1 [Source:HGNC Symbol;Acc:21378]	protein_coding	21.1687	13.5031	6.76481	7.25467	10.0483	17.2514	18.7175	15.5779	13.2938	30.4511	3
ENSG00000120262	CCDC170	coiled-coil domain containing 170 [Source:HGNC Symbol;Acc:21177]	protein_coding	0.177863	0.567391	0.652036	0.985892	1.46894	0.747756	0.886234	1.11591	2.24068	1.58205	3
ENSG00000120322	PCDHB8	protocadherin beta 8 [Source:HGNC Symbol;Acc:8693]	protein_coding	0.165541	0.335263	0.234371	0.448816	0.510017	0.10752	0.13919	0.182746	0.167686	0.902538	3
ENSG00000120337	TNFSF18	tumor necrosis factor (ligand) superfamily, member 18 [Source:HGNC Symbol;Acc:11932]	protein_coding	0.0339677	0.153784	0.811927	0.985232	0.767996	0.565669	0.656999	0.688142	1.48019	9.84809	3
ENSG00000120594	PLXDC2	plexin domain containing 2 [Source:HGNC Symbol;Acc:21013]	protein_coding	0.0151068	0.00279448	0.198656	0.244935	1.1673	2.69561	3.12332	3.43834	5.66802	8.42542	3
ENSG00000123572	NRK	Nik related kinase [Source:HGNC Symbol;Acc:25391]	protein_coding	0	0.00127923	0.0366495	0.0413715	1.34822	1.32618	1.84848	1.53078	0.652293	2.19041	3
ENSG00000123700	KCNJ2	potassium inwardly-rectifying channel, subfamily J, member 2 [Source:HGNC Symbol;Acc:6263]	protein_coding	1.37361	2.7245	3.00709	3.79036	5.44205	3.06596	2.69117	1.34204	3.68613	6.47105	3
ENSG00000124882	EREG	epiregulin [Source:HGNC Symbol;Acc:3443]	protein_coding	1.72692	1.17293	0.130155	0.178338	0.572252	0.853567	0.761964	0.690077	0.901069	3.56534	3
ENSG00000125148	MT2A	metallothionein 2A [Source:HGNC Symbol;Acc:7406]	protein_coding	260.52	120.186	120.766	60.8777	49.1688	122.853	132.478	109.249	119.844	332.974	3
ENSG00000125398	SOX9	SRY (sex determining region Y)-box 9 [Source:HGNC Symbol;Acc:11204]	protein_coding	5.34308	2.5174	0.802957	0.652758	0.741051	13.704	11.3651	10.836	9.91792	20.8761	3
ENSG00000125510	OPRL1	opiate receptor-like 1 [Source:HGNC Symbol;Acc:8155]	protein_coding	0.3783	0.536702	0.547482	0.750801	1.23316	0.743328	0.555884	0.596025	1.08173	1.49249	3
ENSG00000125848	FLRT3	fibronectin leucine rich transmembrane protein 3 [Source:HGNC Symbol;Acc:3762]	protein_coding	0.294943	0.439357	0.911225	1.33332	1.06256	1.2083	1.28867	1.43976	2.93289	3.32521	3
ENSG00000126838	PZP	pregnancy-zone protein [Source:HGNC Symbol;Acc:9750]	protein_coding	0.0096205	0.0416231	0.0075184	0.00604386	0.110775	0.23023	0.220614	0.0505016	0.111198	1.28792	3
ENSG00000127325	BEST3	bestrophin 3 [Source:HGNC Symbol;Acc:17105]	protein_coding	0.0232884	0.0324177	0.0129686	0.00610685	0.0725247	0.0296516	0.0221267	0.0315686	0.0389069	0.111152	3
ENSG00000127415	IDUA	iduronidase, alpha-L- [Source:HGNC Symbol;Acc:5391]	protein_coding	3.48037	5.75969	7.78718	7.06717	7.26541	4.46015	4.12307	4.27014	6.77286	9.11723	3
ENSG00000128510	CPA4	carboxypeptidase A4 [Source:HGNC Symbol;Acc:15740]	protein_coding	14.3365	37.6484	16.149	13.6552	21.4403	19.2887	28.1271	29.5513	15.1156	41.5368	3
ENSG00000128655	PDE11A	phosphodiesterase 11A [Source:HGNC Symbol;Acc:8773]	protein_coding	0.0352696	0.0190687	0.0925987	0.158367	0.356545	0.036918	0.0545815	0.0678002	0.0672038	0.452113	3
ENSG00000128805	ARHGAP22	Rho GTPase activating protein 22 [Source:HGNC Symbol;Acc:30320]	protein_coding	6.76424	3.38474	2.08901	1.95958	3.18488	8.53131	9.97796	8.68328	5.37464	16.3789	3
ENSG00000128872	TMOD2	tropomodulin 2 (neuronal) [Source:HGNC Symbol;Acc:11872]	protein_coding	1.35176	1.39682	1.55573	2.23898	3.04244	2.31239	2.17879	2.24001	1.97954	4.70193	3
ENSG00000129946	SHC2	SHC (Src homology 2 domain containing) transforming protein 2 [Source:HGNC Symbol;Acc:29869]	protein_coding	0.212346	0.713716	0.247627	0.273359	2.25241	2.04198	1.43989	1.44107	4.65933	7.05955	3
ENSG00000130176	CNN1	calponin 1, basic, smooth muscle [Source:HGNC Symbol;Acc:2155]	protein_coding	36.1153	77.7587	60.0494	50.9518	36.4434	33.8073	48.1146	52.6331	27.6376	81.2526	3
ENSG00000130203	APOE	apolipoprotein E [Source:HGNC Symbol;Acc:613]	protein_coding	1.5983	2.86032	3.02079	3.29513	5.96998	8.20085	4.29632	3.54143	9.7483	30.1989	3
ENSG00000130962	PRRG1	proline rich Gla (G-carboxyglutamic acid) 1 [Source:HGNC Symbol;Acc:9469]	protein_coding	4.31393	6.50927	5.42685	8.13038	12.2092	6.69267	5.57948	5.41841	11.6609	13.3028	3
ENSG00000132688	NES	nestin [Source:HGNC Symbol;Acc:7756]	protein_coding	93.3702	61.1893	21.0159	17.3185	22.8468	72.7713	90.9217	85.2858	57.1701	138.834	3
ENSG00000133135	RNF128	ring finger protein 128, E3 ubiquitin protein ligase [Source:HGNC Symbol;Acc:21153]	protein_coding	0.0519001	0.026435	0.145456	0.141852	0.275484	0.614229	0.587342	0.413568	0.32907	2.02919	3
ENSG00000133878	DUSP26	dual specificity phosphatase 26 (putative) [Source:HGNC Symbol;Acc:28161]	protein_coding	0.0106839	0.00949569	0.0179162	0.0140875	0.167363	0.0103633	0.00894924	0.00416213	0.0252301	0.220373	3
ENSG00000134243	SORT1	sortilin 1 [Source:HGNC Symbol;Acc:11186]	protein_coding	9.24524	15.1807	16.916	22.2	33.4158	20.4075	25.5821	20.5099	21.3733	44.5814	3
ENSG00000134369	NAV1	neuron navigator 1 [Source:HGNC Symbol;Acc:15989]	protein_coding	13.8489	10.7455	4.81907	5.44307	5.00608	17.4692	18.0779	13.3989	9.79612	22.6192	3
ENSG00000134376	CRB1	crumbs homolog 1 (Drosophila) [Source:HGNC Symbol;Acc:2343]	protein_coding	0.00312969	0.00695087	0.00589611	0.0124757	0.0227718	0.00756263	0.0100786	0.00754366	0.0149634	0.0619755	3
ENSG00000134716	CYP2J2	cytochrome P450, family 2, subfamily J, polypeptide 2 [Source:HGNC Symbol;Acc:2634]	protein_coding	0.0385882	0.0361024	0.0251727	0.0180117	0.175962	0.0234127	0.0137984	0.0170665	0.00354227	0.14092	3
ENSG00000134769	DTNA	dystrobrevin, alpha [Source:HGNC Symbol;Acc:3057]	protein_coding	1.05371	1.36024	0.112848	0.213379	1.22709	1.26996	0.920044	0.636774	0.895268	2.2915	3
ENSG00000135373	EHF	ets homologous factor [Source:HGNC Symbol;Acc:3246]	protein_coding	0.0143051	0.031499	0	0.00200915	0.0981679	0.0137652	0.0362152	0.0288624	0.024362	0.300063	3
ENSG00000135744	AGT	angiotensinogen (serpin peptidase inhibitor, clade A, member 8) [Source:HGNC Symbol;Acc:333]	protein_coding	0.0766904	0.194948	0.317552	0.329774	1.10746	1.39873	1.04127	0.341357	2.03269	6.92629	3
ENSG00000135899	SP110	SP110 nuclear body protein [Source:HGNC Symbol;Acc:5401]	protein_coding	2.53687	2.44284	1.58329	1.75829	1.24603	1.79879	2.05828	2.16777	1.6176	3.85132	3
ENSG00000135951	TSGA10	testis specific, 10 [Source:HGNC Symbol;Acc:14927]	protein_coding	0.111155	0.155821	0.0584728	0.0839294	0.193111	0.105087	0.085672	0.104283	0.0800916	0.19831	3
ENSG00000136531	SCN2A	sodium channel, voltage-gated, type II, alpha subunit [Source:HGNC Symbol;Acc:10588]	protein_coding	0.0719749	0.0952078	0.0623939	0.121924	0.327668	0.385981	0.299299	0.413867	0.302068	0.628122	3
ENSG00000136541	ERMN	ermin, ERM-like protein [Source:HGNC Symbol;Acc:29208]	protein_coding	0.00432851	0.0220913	0.0198455	0.0594191	0.0753531	0.0565747	0.0554619	0.0634492	0.0697252	0.236177	3
ENSG00000136867	SLC31A2	solute carrier family 31 (copper transporters), member 2 [Source:HGNC Symbol;Acc:11017]	protein_coding	0.183343	0.277739	0.336966	0.486073	0.640861	0.278741	0.305002	0.226765	0.370151	0.628873	3
ENSG00000137809	ITGA11	integrin, alpha 11 [Source:HGNC Symbol;Acc:6136]	protein_coding	1.41737	2.95069	2.72958	3.1616	9.40242	43.105	49.5127	51.5265	63.242	87.5278	3
ENSG00000137831	UACA	uveal autoantigen with coiled-coil domains and ankyrin repeats [Source:HGNC Symbol;Acc:15947]	protein_coding	54.7564	35.6666	14.1888	13.4922	15.3664	33.8947	34.2964	35.9511	32.8736	99.6847	3
ENSG00000137872	SEMA6D	sema domain, transmembrane domain (TM), and cytoplasmic domain, (semaphorin) 6D [Source:HGNC Symbol;Acc:16770]	protein_coding	2.17291	1.82252	2.31577	3.32881	4.72775	1.18334	1.30712	2.19217	2.9016	7.61067	3
ENSG00000138411	HECW2	HECT, C2 and WW domain containing E3 ubiquitin protein ligase 2 [Source:HGNC Symbol;Acc:29853]	protein_coding	2.04328	2.46252	0.825432	1.1658	1.50934	1.14501	1.15042	1.17972	0.917325	2.2029	3
ENSG00000138439	FAM117B	family with sequence similarity 117, member B [Source:HGNC Symbol;Acc:14440]	protein_coding	0.418953	0.548505	0.472466	0.558843	1.0708	1.17956	0.881141	0.946151	1.7246	3.44761	3
ENSG00000138669	PRKG2	protein kinase, cGMP-dependent, type II [Source:HGNC Symbol;Acc:9416]	protein_coding	1.87594	1.98232	0.314039	0.643087	3.18735	3.07262	2.45988	0.957531	1.0129	1.84897	3
ENSG00000138798	EGF	epidermal growth factor [Source:HGNC Symbol;Acc:3229]	protein_coding	0.0703689	0.101216	0.217593	0.235708	0.493139	0.194306	0.233829	0.382661	0.199646	0.442581	3
ENSG00000139970	RTN1	reticulon 1 [Source:HGNC Symbol;Acc:10467]	protein_coding	0.0195622	0.00662149	0.0202659	0.0181502	0.134513	0.100703	0.144987	0.0638129	0.0369649	0.170286	3
ENSG00000139971	C14orf37	chromosome 14 open reading frame 37 [Source:HGNC Symbol;Acc:19846]	protein_coding	0.426659	0.421425	0.674328	0.99677	1.69025	1.5594	1.67987	1.34451	0.89175	1.91734	3
ENSG00000140563	MCTP2	multiple C2 domains, transmembrane 2 [Source:HGNC Symbol;Acc:25636]	protein_coding	0.204884	0.428414	0.346496	0.611684	1.29373	2.04454	2.06817	1.38329	2.41283	4.42384	3
ENSG00000141469	SLC14A1	solute carrier family 14 (urea transporter), member 1 (Kidd blood group) [Source:HGNC Symbol;Acc:10918]	protein_coding	0.860836	0.762535	0.26151	0.138277	0.909955	17.7777	16.1727	6.74319	5.82011	94.5615	3
ENSG00000143127	ITGA10	integrin, alpha 10 [Source:HGNC Symbol;Acc:6135]	protein_coding	0.184389	0.146328	0.1047	0.103456	0.415951	1.69855	1.60238	0.919313	1.24178	3.67567	3
ENSG00000143248	RGS5	regulator of G-protein signaling 5 [Source:HGNC Symbol;Acc:10001]	protein_coding	0.608092	1.10764	0.120968	0.134694	0.341415	1.3921	1.35136	1.31531	1.18372	18.1035	3
ENSG00000143786	CNIH3	cornichon homolog 3 (Drosophila) [Source:HGNC Symbol;Acc:26802]	protein_coding	0.440927	0.329997	0.357592	0.245602	0.696197	2.41927	1.9204	1.51009	1.36308	4.73348	3
ENSG00000144619	CNTN4	contactin 4 [Source:HGNC Symbol;Acc:2174]	protein_coding	0.00543212	0.00662557	0.0153748	0.0136488	0.0511621	0.0219834	0.0123839	0.0125692	0.0151468	0.153751	3
ENSG00000144893	MED12L	mediator complex subunit 12-like [Source:HGNC Symbol;Acc:16050]	protein_coding	0.0200351	0.0299121	0.0190814	0.0457489	0.0817674	0.0392095	0.0378181	0.0253221	0.0184356	0.105192	3
ENSG00000145506	NKD2	naked cuticle homolog 2 (Drosophila) [Source:HGNC Symbol;Acc:17046]	protein_coding	0.00740157	0	0.00274082	0	0.235539	1.05324	1.01888	0.344266	1.21696	2.26013	3
ENSG00000145808	ADAMTS19	ADAM metallopeptidase with thrombospondin type 1 motif, 19 [Source:HGNC Symbol;Acc:17111]	protein_coding	0.00755974	0.0212168	0.0229064	0.0267427	0.122357	0.902102	0.993248	0.541109	1.28098	9.70598	3
ENSG00000146072	TNFRSF21	tumor necrosis factor receptor superfamily, member 21 [Source:HGNC Symbol;Acc:13469]	protein_coding	11.7392	7.95803	0.788636	1.14505	8.45648	21.4482	19.1897	18.9782	18.5309	50.388	3
ENSG00000147041	SYTL5	synaptotagmin-like 5 [Source:HGNC Symbol;Acc:15589]	protein_coding	0.395529	0.768063	0.0459193	0.0493253	0.0456435	0.235213	0.242759	0.174536	0.111708	0.807281	3
ENSG00000147408	CSGALNACT1	chondroitin sulfate N-acetylgalactosaminyltransferase 1 [Source:HGNC Symbol;Acc:24290]	protein_coding	0.687689	0.386834	0.314261	0.270098	0.216922	1.23922	1.02703	0.527924	1.10381	3.22836	3
ENSG00000147642	SYBU	syntabulin (syntaxin-interacting) [Source:HGNC Symbol;Acc:26011]	protein_coding	0.280299	0.784573	0.49586	0.446452	0.453301	0.314796	0.202594	0.222414	0.399092	0.733429	3
ENSG00000147883	CDKN2B	cyclin-dependent kinase inhibitor 2B (p15, inhibits CDK4) [Source:HGNC Symbol;Acc:1788]	protein_coding	1.14745	2.20708	3.07229	4.24319	5.45197	6.02006	4.63216	4.52371	10.1503	10.3566	3
ENSG00000148426	C10orf47	chromosome 10 open reading frame 47 [Source:HGNC Symbol;Acc:23728]	protein_coding	0.385217	0.515981	0.305942	0.516928	1.42969	1.36586	1.50081	1.37916	1.80506	3.79364	3
ENSG00000148677	ANKRD1	ankyrin repeat domain 1 (cardiac muscle) [Source:HGNC Symbol;Acc:15819]	protein_coding	0.193714	0.339563	0.267088	0.344069	1.40179	0.699057	1.57255	1.73368	1.30875	8.9889	3
ENSG00000148798	INA	internexin neuronal intermediate filament protein, alpha [Source:HGNC Symbol;Acc:6057]	protein_coding	2.21313	1.78713	0.783613	0.882148	8.41162	3.93693	3.85346	4.70018	3.03267	7.30612	3
ENSG00000149201	CCDC81	coiled-coil domain containing 81 [Source:HGNC Symbol;Acc:26281]	protein_coding	0.548664	0.767987	0.237986	0.254954	0.51028	0.782666	1.62753	2.33958	1.54594	3.40294	3
ENSG00000149596	JPH2	junctophilin 2 [Source:HGNC Symbol;Acc:14202]	protein_coding	1.87187	3.14441	4.98103	4.63174	2.1431	2.0925	2.89681	3.60806	2.20528	4.74246	3
ENSG00000149948	HMGA2	high mobility group AT-hook 2 [Source:HGNC Symbol;Acc:5009]	protein_coding	19.4524	11.2793	3.2909	3.43639	7.53661	17.845	20.5269	13.7343	6.0343	27.6494	3
ENSG00000150337	FCGR1A	Fc fragment of IgG, high affinity Ia, receptor (CD64) [Source:HGNC Symbol;Acc:3613]	protein_coding	0.00648293	0.0266659	0.0202287	0.032022	0.0668915	0.0032483	0.0107079	0.00284046	0.0219555	0.0778451	3
ENSG00000150510	FAM124A	family with sequence similarity 124A [Source:HGNC Symbol;Acc:26413]	protein_coding	0.0603448	0.0469895	0.0505043	0.0451103	0.230145	0.18353	0.200569	0.247191	0.450019	0.620307	3
ENSG00000150687	PRSS23	protease, serine, 23 [Source:HGNC Symbol;Acc:14370]	protein_coding	20.5106	14.1856	20.6961	18.6797	40.9666	18.87	25.8189	26.5452	27.1542	51.7531	3
ENSG00000151322	NPAS3	neuronal PAS domain protein 3 [Source:HGNC Symbol;Acc:19311]	protein_coding	0.00210322	0.00840688	0.0249128	0.0170921	0.0578818	0.0109472	0.0034739	0.0045049	0.0116547	0.136151	3
ENSG00000151388	ADAMTS12	ADAM metallopeptidase with thrombospondin type 1 motif, 12 [Source:HGNC Symbol;Acc:14605]	protein_coding	9.79238	13.5129	5.16381	6.64559	6.13081	8.06235	11.3017	11.4269	8.0866	21.8751	3
ENSG00000151623	NR3C2	nuclear receptor subfamily 3, group C, member 2 [Source:HGNC Symbol;Acc:7979]	protein_coding	0.0128984	0.0297282	0.0218011	0.033933	0.254409	1.03177	1.03931	1.29308	1.65148	4.55211	3
ENSG00000152127	MGAT5	mannosyl (alpha-1,6-)-glycoprotein beta-1,6-N-acetyl-glucosaminyltransferase [Source:HGNC Symbol;Acc:7049]	protein_coding	11.2265	14.2927	20.5942	25.8615	44.6658	38.0197	42.2826	30.3458	21.3015	55.2653	3
ENSG00000152154	TMEM178A	transmembrane protein 178A [Source:HGNC Symbol;Acc:28517]	protein_coding	0.412688	1.65829	1.43569	2.12614	2.39818	1.75916	1.23339	1.06913	3.48254	6.29399	3
ENSG00000152433	ZNF547	zinc finger protein 547 [Source:HGNC Symbol;Acc:26432]	protein_coding	0.29975	0.698591	0.393556	0.495728	1.01372	0.456096	0.634766	0.743428	0.882945	1.12786	3
ENSG00000152689	RASGRP3	RAS guanyl releasing protein 3 (calcium and DAG-regulated) [Source:HGNC Symbol;Acc:14545]	protein_coding	0.43973	0.268116	0.219818	0.219856	0.182369	0.296149	0.373696	0.354149	0.322656	0.624264	3
ENSG00000152785	BMP3	bone morphogenetic protein 3 [Source:HGNC Symbol;Acc:1070]	protein_coding	0.0687274	0.0690472	0.0934175	0.139106	0.239887	0.167271	0.157837	0.154754	0.11254	0.550327	3
ENSG00000152894	PTPRK	protein tyrosine phosphatase, receptor type, K [Source:HGNC Symbol;Acc:9674]	protein_coding	13.38	19.0847	25.7542	34.3457	29.7558	22.4595	22.5217	22.9711	27.6396	64.3524	3
ENSG00000152952	PLOD2	procollagen-lysine, 2-oxoglutarate 5-dioxygenase 2 [Source:HGNC Symbol;Acc:9082]	protein_coding	23.5804	23.7285	11.9596	13.7941	33.1974	18.8795	26.8202	25.4711	22.8523	41.0206	3
ENSG00000153982	GDPD1	glycerophosphodiester phosphodiesterase domain containing 1 [Source:HGNC Symbol;Acc:20883]	protein_coding	0.385494	0.568098	0.627902	1.03022	0.988452	0.599052	0.512397	0.547425	0.749433	1.35498	3
ENSG00000154639	CXADR	coxsackie virus and adenovirus receptor [Source:HGNC Symbol;Acc:2559]	protein_coding	0.0402283	0.0313493	0.0237623	0.0214653	0.0830994	0.279171	0.310152	0.16362	0.151444	0.89854	3
ENSG00000155011	DKK2	dickkopf 2 homolog (Xenopus laevis) [Source:HGNC Symbol;Acc:2892]	protein_coding	0.0178095	0.0314594	0.0707397	0.0956167	1.81247	0.0946712	0.10365	0.120022	0.0867762	2.31163	3
ENSG00000155962	CLIC2	chloride intracellular channel 2 [Source:HGNC Symbol;Acc:2063]	protein_coding	0.0811076	0.236398	0.210624	0.267374	0.5278	0.250609	0.133679	0.214606	0.404204	0.559744	3
ENSG00000156011	PSD3	pleckstrin and Sec7 domain containing 3 [Source:HGNC Symbol;Acc:19093]	protein_coding	5.91356	5.84548	2.70316	3.43394	7.04406	4.26278	3.91391	4.05956	7.05534	10.2514	3
ENSG00000156265	C21orf7	chromosome 21 open reading frame 7 [Source:HGNC Symbol;Acc:16457]	protein_coding	0.864391	1.07895	0.950819	1.18997	5.51553	4.06034	4.56647	4.09697	4.25742	14.6201	3
ENSG00000156463	SH3RF2	SH3 domain containing ring finger 2 [Source:HGNC Symbol;Acc:26299]	protein_coding	0.162028	0.236539	0.0439158	0.0697467	0.0964442	0.663347	0.727873	0.73503	0.601699	1.25156	3
ENSG00000157168	NRG1	neuregulin 1 [Source:HGNC Symbol;Acc:7997]	protein_coding	3.3387	1.36121	1.38091	1.84006	1.54363	1.32587	1.45221	2.07612	2.06039	6.14612	3
ENSG00000157404	KIT	v-kit Hardy-Zuckerman 4 feline sarcoma viral oncogene homolog [Source:HGNC Symbol;Acc:6342]	protein_coding	2.75797	5.6986	2.32961	3.10687	5.90822	5.86685	6.88428	7.61888	7.4634	11.7448	3
ENSG00000157542	KCNJ6	potassium inwardly-rectifying channel, subfamily J, member 6 [Source:HGNC Symbol;Acc:6267]	protein_coding	0.0522597	0.143215	0.178962	0.247022	1.89636	0.89065	1.11719	1.19466	2.69497	7.16848	3
ENSG00000157551	KCNJ15	potassium inwardly-rectifying channel, subfamily J, member 15 [Source:HGNC Symbol;Acc:6261]	protein_coding	0.103357	0.0436986	0.0371305	0.019616	0.126571	0.191443	0.22017	0.117014	0.241483	1.36579	3
ENSG00000158815	FGF17	fibroblast growth factor 17 [Source:HGNC Symbol;Acc:3673]	protein_coding	0.00991266	0.0190897	0.0457601	0.0493608	0.118711	0.0796914	0.0566726	0.0684821	0.241827	0.349908	3
ENSG00000159167	STC1	stanniocalcin 1 [Source:HGNC Symbol;Acc:11373]	protein_coding	48.9782	21.6888	7.34198	8.66096	57.9482	28.2478	22.8756	8.99612	11.6758	90.3564	3
ENSG00000159348	CYB5R1	cytochrome b5 reductase 1 [Source:HGNC Symbol;Acc:13397]	protein_coding	8.89371	11.5881	10.7374	10.5665	17.8196	11.052	13.4057	9.97933	13.3255	26.7775	3
ENSG00000159674	SPON2	spondin 2, extracellular matrix protein [Source:HGNC Symbol;Acc:11253]	protein_coding	1.67759	5.54633	25.2403	25.6849	14.3691	59.2275	69.3576	99.9639	159.336	145.14	3
ENSG00000160190	SLC37A1	solute carrier family 37 (glycerol-3-phosphate transporter), member 1 [Source:HGNC Symbol;Acc:11024]	protein_coding	0.230336	0.247605	0.0763543	0.0833019	0.274331	0.105822	0.0929827	0.117069	0.209273	0.292766	3
ENSG00000160471	COX6B2	cytochrome c oxidase subunit VIb polypeptide 2 (testis) [Source:HGNC Symbol;Acc:24380]	protein_coding	0.26496	0.387199	0.38503	0.48108	0.704107	0.291097	0.238025	0.194944	0.273783	0.862516	3
ENSG00000162643	WDR63	WD repeat domain 63 [Source:HGNC Symbol;Acc:30711]	protein_coding	0.675203	0.997611	0.676806	0.978876	1.54985	0.544746	0.389555	0.410557	0.605533	1.75153	3
ENSG00000162840	MT1P2	metallothionein 1 pseudogene 2 [Source:HGNC Symbol;Acc:31864]	pseudogene	16.8908	10.1446	6.30958	3.31522	3.32355	7.2639	8.31266	6.79715	8.25921	18.2623	3
ENSG00000163346	PBXIP1	pre-B-cell leukemia homeobox interacting protein 1 [Source:HGNC Symbol;Acc:21199]	protein_coding	14.8668	27.9387	32.6073	32.3359	51.7583	26.2185	24.4438	22.9665	34.6	68.1634	3
ENSG00000163347	CLDN1	claudin 1 [Source:HGNC Symbol;Acc:2032]	protein_coding	0.132792	0.509665	0.0654075	0.0985468	0.713628	29.4535	37.0975	23.4904	41.4024	61.716	3
ENSG00000163376	KBTBD8	kelch repeat and BTB (POZ) domain containing 8 [Source:HGNC Symbol;Acc:30691]	protein_coding	0.289064	0.137207	0.168458	0.292125	0.320237	1.60268	0.828197	0.781719	0.531419	1.97535	3
ENSG00000163491	NEK10	NIMA (never in mitosis gene a)- related kinase 10 [Source:HGNC Symbol;Acc:18592]	protein_coding	0.86584	0.871999	0.141107	0.217689	0.389976	1.05133	0.901798	0.686123	0.487414	1.27058	3
ENSG00000163536	SERPINI1	serpin peptidase inhibitor, clade I (neuroserpin), member 1 [Source:HGNC Symbol;Acc:8943]	protein_coding	0.297401	0.292092	0.190676	0.345961	1.95751	0.334683	0.416752	0.532246	0.700115	3.99918	3
ENSG00000163590	PPM1L	protein phosphatase, Mg2+/Mn2+ dependent, 1L [Source:HGNC Symbol;Acc:16381]	protein_coding	0.0400067	0.0483935	0.0666381	0.0792296	0.0856086	0.185588	0.157941	0.204689	0.211027	0.38577	3
ENSG00000163762	TM4SF18	transmembrane 4 L six family member 18 [Source:HGNC Symbol;Acc:25181]	protein_coding	0.104904	0.0391189	0.00818747	0.00892944	0.00987254	0.0378774	0.0457157	0.0401947	0.0203874	0.284774	3
ENSG00000164171	ITGA2	integrin, alpha 2 (CD49B, alpha 2 subunit of VLA-2 receptor) [Source:HGNC Symbol;Acc:6137]	protein_coding	19.8821	8.74787	1.01924	1.51574	2.44383	28.0523	25.856	22.0693	18.9299	51.6576	3
ENSG00000164176	EDIL3	EGF-like repeats and discoidin I-like domains 3 [Source:HGNC Symbol;Acc:3173]	protein_coding	0.244709	0.769052	0.62013	0.773357	2.49135	25.3736	36.1687	46.6462	67.8726	78.3129	3
ENSG00000164342	TLR3	toll-like receptor 3 [Source:HGNC Symbol;Acc:11849]	protein_coding	0.418694	0.461031	0.254941	0.348272	0.194959	0.352482	0.303522	0.519274	0.91294	0.869756	3
ENSG00000165029	ABCA1	ATP-binding cassette, sub-family A (ABC1), member 1 [Source:HGNC Symbol;Acc:29]	protein_coding	3.92659	12.0532	7.09762	10.32	13.0064	10.6431	9.14806	5.36332	13.5838	19.569	3
ENSG00000165434	PGM2L1	phosphoglucomutase 2-like 1 [Source:HGNC Symbol;Acc:20898]	protein_coding	0.667643	0.766846	0.628639	0.812108	1.57691	1.347	1.20728	0.972719	1.2684	4.24486	3
ENSG00000165507	C10orf10	chromosome 10 open reading frame 10 [Source:HGNC Symbol;Acc:23355]	protein_coding	0.122041	0.82462	0.808468	1.10886	2.34482	6.5853	8.0937	5.77187	15.1538	12.8758	3
ENSG00000165617	DACT1	dapper, antagonist of beta-catenin, homolog 1 (Xenopus laevis) [Source:HGNC Symbol;Acc:17748]	protein_coding	0.824166	0.991213	2.2329	2.26125	0.802545	1.20535	0.899433	1.01385	1.51612	3.75541	3
ENSG00000165757	KIAA1462	KIAA1462 [Source:HGNC Symbol;Acc:29283]	protein_coding	0.704583	0.821093	3.23109	3.75124	5.64198	18.7299	18.708	17.6726	18.9428	40.2223	3
ENSG00000166349	RAG1	recombination activating gene 1 [Source:HGNC Symbol;Acc:9831]	protein_coding	0.0810488	0.101183	0.062956	0.136529	0.237512	0.0886633	0.104742	0.107876	0.116313	0.368848	3
ENSG00000166446	CDYL2	chromodomain protein, Y-like 2 [Source:HGNC Symbol;Acc:23030]	protein_coding	0.381215	0.365726	1.13565	1.18476	0.716823	1.57259	1.51457	1.94268	1.23276	3.10112	3
ENSG00000166510	CCDC68	coiled-coil domain containing 68 [Source:HGNC Symbol;Acc:24350]	protein_coding	0.0592855	0.0946862	0.106163	0.100815	0.44517	11.6133	8.05579	6.36646	16.8069	70.746	3
ENSG00000167080	B4GALNT2	beta-1,4-N-acetyl-galactosaminyl transferase 2 [Source:HGNC Symbol;Acc:24136]	protein_coding	0.528202	0.564762	0.0221694	0.0220129	0.126672	0.184593	0.231294	0.27061	0.600714	0.771588	3
ENSG00000167311	ART5	ADP-ribosyltransferase 5 [Source:HGNC Symbol;Acc:24049]	protein_coding	0.0342374	0.154609	0.0591176	0.129053	0.367407	0.331637	0.168797	0.197964	0.329871	1.01418	3
ENSG00000167600	CYP2S1	cytochrome P450, family 2, subfamily S, polypeptide 1 [Source:HGNC Symbol;Acc:15654]	protein_coding	0.565466	0.29009	0.0697288	0.0588387	0.0497272	4.38889	4.13523	4.82093	4.68765	12.3854	3
ENSG00000167740	CYB5D2	cytochrome b5 domain containing 2 [Source:HGNC Symbol;Acc:28471]	protein_coding	7.54676	10.0168	11.1796	12.2927	16.4746	7.85742	7.31205	6.85825	12.4972	19.5353	3
ENSG00000167772	ANGPTL4	angiopoietin-like 4 [Source:HGNC Symbol;Acc:16039]	protein_coding	3.01431	1.36059	0.962809	0.961296	4.82579	1.41965	1.29763	1.32104	1.14688	10.2984	3
ENSG00000167861	C17orf28	chromosome 17 open reading frame 28 [Source:HGNC Symbol;Acc:15736]	protein_coding	0.153612	0.251362	0.143312	0.148048	0.531621	0.217753	0.188375	0.127681	0.385236	1.20277	3
ENSG00000167964	RAB26	RAB26, member RAS oncogene family [Source:HGNC Symbol;Acc:14259]	protein_coding	0.429773	0.427469	0.237018	0.268786	0.812184	1.18736	1.043	0.938737	1.27072	3.27995	3
ENSG00000168702	LRP1B	low density lipoprotein receptor-related protein 1B [Source:HGNC Symbol;Acc:6693]	protein_coding	0.0392847	0.0797496	0.0182439	0.0280619	0.0493305	0.20659	0.184038	0.4085	0.751597	0.636594	3
ENSG00000169116	PARM1	prostate androgen-regulated mucin-like protein 1 [Source:HGNC Symbol;Acc:24536]	protein_coding	0.0135493	0.0115683	0.0162255	0.0103181	0.0834414	0.0197314	0.00956563	0.0256698	0.0376113	0.750885	3
ENSG00000169252	ADRB2	adrenoceptor beta 2, surface [Source:HGNC Symbol;Acc:286]	protein_coding	1.9123	0.90728	4.11892	3.80865	1.51686	4.71814	3.68286	2.6879	3.09595	8.23611	3
ENSG00000169908	TM4SF1	transmembrane 4 L six family member 1 [Source:HGNC Symbol;Acc:11853]	protein_coding	0.913631	0.345688	0.313706	0.2872	0.254883	82.1417	80.3255	54.6029	55.2226	141.292	3
ENSG00000170458	CD14	CD14 molecule [Source:HGNC Symbol;Acc:1628]	protein_coding	0.797428	0.498586	0.642906	0.747767	2.09142	0.42528	0.496876	0.345216	0.95816	6.55287	3
ENSG00000170873	MTSS1	metastasis suppressor 1 [Source:HGNC Symbol;Acc:20443]	protein_coding	0.313638	0.385913	0.18418	0.202988	0.479028	2.71565	2.39891	1.52166	1.64861	8.44327	3
ENSG00000171246	NPTX1	neuronal pentraxin I [Source:HGNC Symbol;Acc:7952]	protein_coding	1.55397	1.0137	0.476272	0.335804	2.51793	82.2756	83.4832	102.57	72.8719	145.9	3
ENSG00000171310	CHST11	carbohydrate (chondroitin 4) sulfotransferase 11 [Source:HGNC Symbol;Acc:17422]	protein_coding	0.966204	0.574171	0.832523	0.918025	0.381123	0.389113	0.383955	0.492418	0.313001	1.74596	3
ENSG00000171316	CHD7	chromodomain helicase DNA binding protein 7 [Source:HGNC Symbol;Acc:20626]	protein_coding	0.0348013	0.0271463	0.0360901	0.0119472	0.0496912	0.0892657	0.104181	0.0425544	0.0323879	0.114361	3
ENSG00000171385	KCND3	potassium voltage-gated channel, Shal-related subfamily, member 3 [Source:HGNC Symbol;Acc:6239]	protein_coding	0.0828687	0.455678	1.66429	1.63074	0.221011	0.110494	0.127698	0.146415	0.273516	1.69353	3
ENSG00000171951	SCG2	secretogranin II [Source:HGNC Symbol;Acc:10575]	protein_coding	0.344234	0.484873	0.0455746	0.0508086	0.208088	1.06567	1.54892	0.26133	0.365025	7.04545	3
ENSG00000172137	CALB2	calbindin 2 [Source:HGNC Symbol;Acc:1435]	protein_coding	0.0224503	0.0683836	0.19598	0.176011	0.616644	1.35979	0.766991	0.940796	1.38925	8.88674	3
ENSG00000172399	MYOZ2	myozenin 2 [Source:HGNC Symbol;Acc:1330]	protein_coding	0.241455	0.473915	0.229691	0.281015	1.30015	0.494251	0.454603	0.111518	0.352398	5.57369	3
ENSG00000172403	SYNPO2	synaptopodin 2 [Source:HGNC Symbol;Acc:17732]	protein_coding	5.00953	10.1546	9.30831	10.9831	13.1177	5.63816	8.81305	3.23913	3.08429	25.6861	3
ENSG00000172733	PURG	purine-rich element binding protein G [Source:HGNC Symbol;Acc:17930]	protein_coding	0.021057	0.0361865	0.0577155	0.0906713	0.462975	0.53852	0.498778	0.717106	0.918764	1.28736	3
ENSG00000173114	LRRN3	leucine rich repeat neuronal 3 [Source:HGNC Symbol;Acc:17200]	protein_coding	2.43897	3.53555	4.65618	7.88665	6.4104	3.73142	6.62215	12.0763	7.27623	8.30835	3
ENSG00000173391	OLR1	oxidized low density lipoprotein (lectin-like) receptor 1 [Source:HGNC Symbol;Acc:8133]	protein_coding	1.86359	3.44399	8.7047	11.0935	1.63446	3.15686	3.9564	4.43871	8.76181	9.13445	3
ENSG00000173559	NABP1	nucleic acid binding protein 1 [Source:HGNC Symbol;Acc:26232]	protein_coding	27.0057	35.6613	13.2139	18.4914	20.2193	49.096	64.9823	57.7357	69.7198	103.042	3
ENSG00000173826	KCNH6	potassium voltage-gated channel, subfamily H (eag-related), member 6 [Source:HGNC Symbol;Acc:18862]	protein_coding	0.0593745	0.119176	0.0261656	0.0497308	0.170443	0.0568958	0.0555105	0.0602047	0.0680627	0.278011	3
ENSG00000174672	BRSK2	BR serine/threonine kinase 2 [Source:HGNC Symbol;Acc:11405]	protein_coding	0.0696728	0.0741206	0.111003	0.12854	0.462115	0.154275	0.145089	0.15043	0.190682	0.371184	3
ENSG00000174871	CNIH2	cornichon homolog 2 (Drosophila) [Source:HGNC Symbol;Acc:28744]	protein_coding	0.412461	0.206948	0.222178	0.168606	0.719058	0.716119	0.868611	1.02945	0.675735	1.35682	3
ENSG00000175899	A2M	alpha-2-macroglobulin [Source:HGNC Symbol;Acc:7]	protein_coding	0.396495	2.17846	0.318056	0.495755	4.06658	14.077	12.9309	3.7896	6.91789	82.0911	3
ENSG00000176971	FIBIN	fin bud initiation factor homolog (zebrafish) [Source:HGNC Symbol;Acc:33747]	protein_coding	2.31266	6.29322	7.74116	9.59849	5.72132	21.9538	21.2505	11.3289	17.6792	78.5838	3
ENSG00000177076	ACER2	alkaline ceramidase 2 [Source:HGNC Symbol;Acc:23675]	protein_coding	1.38332	1.44645	0.337274	0.783143	0.940307	0.594888	0.591494	0.649244	0.613551	1.99119	3
ENSG00000177409	SAMD9L	sterile alpha motif domain containing 9-like [Source:HGNC Symbol;Acc:1349]	protein_coding	2.59388	3.81019	4.42764	6.15514	8.17099	3.06821	3.15856	4.98564	5.55659	7.83224	3
ENSG00000180332	KCTD4	potassium channel tetramerisation domain containing 4 [Source:HGNC Symbol;Acc:23227]	protein_coding	0.224198	0.730191	0.789865	1.18479	5.43558	0.328317	0.636909	0.455178	0.463555	4.42092	3
ENSG00000181039	ANKRD34A	ankyrin repeat domain 34A [Source:HGNC Symbol;Acc:27639]	protein_coding	2.20868	1.74903	1.56922	1.33011	3.47471	1.57218	2.2851	2.25914	1.37478	2.93996	3
ENSG00000181072	CHRM2	cholinergic receptor, muscarinic 2 [Source:HGNC Symbol;Acc:1951]	protein_coding	3.15751	4.63403	8.92413	14.1926	31.1248	19.7987	21.3929	33.0665	51.4599	42.2419	3
ENSG00000182667	NTM	neurotrimin [Source:HGNC Symbol;Acc:17941]	protein_coding	1.03477	0.630761	1.40932	1.34534	0.723635	7.8148	8.67759	8.16504	9.31973	16.7218	3
ENSG00000182985	CADM1	cell adhesion molecule 1 [Source:HGNC Symbol;Acc:5951]	protein_coding	0.875656	2.08486	1.72647	2.15825	2.42795	28.533	33.2263	43.0491	58.5512	106.182	3
ENSG00000183111	ARHGEF37	Rho guanine nucleotide exchange factor (GEF) 37 [Source:HGNC Symbol;Acc:34430]	protein_coding	0.24317	0.455797	0.263361	0.393628	1.57564	0.37796	0.373621	0.450209	0.722716	1.58769	3
ENSG00000183186	C2CD4C	C2 calcium-dependent domain containing 4C [Source:HGNC Symbol;Acc:29417]	protein_coding	0.120834	0.0193714	0.0149863	0.0070182	0.0210217	0.019637	0.0235731	0.0369747	0.0236248	0.140766	3
ENSG00000183206	POTEC	POTE ankyrin domain family, member C [Source:HGNC Symbol;Acc:33894]	protein_coding	0	0.00162935	0.00303242	0.00132275	0.0510264	0.0182545	0.0208221	0.00714684	0.014841	0.0954901	3
ENSG00000183378	OVCH2	ovochymase 2 (gene/pseudogene) [Source:HGNC Symbol;Acc:29970]	polymorphic_pseudogene	0.115118	0.299993	0.469237	0.601159	0.292073	0.370759	0.388008	0.372794	0.224607	1.55526	3
ENSG00000183873	SCN5A	sodium channel, voltage-gated, type V, alpha subunit [Source:HGNC Symbol;Acc:10593]	protein_coding	0.18679	0.275455	0.14104	0.15218	0.602733	1.44248	1.79236	1.86391	1.49078	4.58433	3
ENSG00000184156	KCNQ3	potassium voltage-gated channel, KQT-like subfamily, member 3 [Source:HGNC Symbol;Acc:6297]	protein_coding	0.327711	0.363092	0.137885	0.171868	0.402867	0.717337	0.593007	0.266611	0.283801	0.672282	3
ENSG00000184408	KCND2	potassium voltage-gated channel, Shal-related subfamily, member 2 [Source:HGNC Symbol;Acc:6238]	protein_coding	0	0.00194958	0.00329942	0.00935034	0.413545	0.201958	0.127346	0.149127	0.448914	2.09282	3
ENSG00000184497	FAM70B	family with sequence similarity 70, member B [Source:HGNC Symbol;Acc:28297]	protein_coding	0.730847	0.958363	1.72804	1.50006	3.25127	1.25492	1.64961	1.40898	2.11347	4.44321	3
ENSG00000184792	OSBP2	oxysterol binding protein 2 [Source:HGNC Symbol;Acc:8504]	protein_coding	0.255717	0.255056	0.0842469	0.13719	0.354758	0.702949	0.779739	0.555214	0.563321	1.14075	3
ENSG00000185437	SH3BGR	SH3 domain binding glutamic acid-rich protein [Source:HGNC Symbol;Acc:10822]	protein_coding	1.0214	1.35768	1.44779	1.35868	2.63419	1.10775	0.962873	0.572395	1.25028	2.58711	3
ENSG00000185634	SHC4	SHC (Src homology 2 domain containing) family, member 4 [Source:HGNC Symbol;Acc:16743]	protein_coding	1.00687	0.475022	0.211138	0.261726	0.366149	1.0378	0.987927	0.738607	0.680864	1.6314	3
ENSG00000187173	LCE2A	late cornified envelope 2A [Source:HGNC Symbol;Acc:29469]	protein_coding	0.0461553	0.153335	0.0448909	0.0612008	13.8135	0.524369	1.17192	1.40377	1.01494	17.0788	3
ENSG00000187583	PLEKHN1	pleckstrin homology domain containing, family N member 1 [Source:HGNC Symbol;Acc:25284]	protein_coding	1.78904	1.0827	0.530579	0.57923	0.536912	0.849998	0.899628	0.905957	0.775772	1.94583	3
ENSG00000187990	HIST1H2BG	histone cluster 1, H2bg [Source:HGNC Symbol;Acc:4746]	protein_coding	0.858353	0.995711	0.802543	1.72686	3.51442	0.809667	1.04655	0.429813	0.43468	3.5744	3
ENSG00000188487	INSC	inscuteable homolog (Drosophila) [Source:HGNC Symbol;Acc:33116]	protein_coding	0.756177	0.193122	0.0232331	0.0307995	0.0800542	2.08422	2.3275	2.48713	2.71486	12.9636	3
ENSG00000189221	MAOA	monoamine oxidase A [Source:HGNC Symbol;Acc:6833]	protein_coding	1.02168	1.28909	2.10359	2.57926	3.74719	1.83619	1.65078	1.6865	2.23805	3.6952	3
ENSG00000196358	NTNG2	netrin G2 [Source:HGNC Symbol;Acc:14288]	protein_coding	0.120008	0.184179	0.331328	0.313767	0.338384	0.646015	0.630648	0.568299	0.465291	0.932124	3
ENSG00000196782	MAML3	mastermind-like 3 (Drosophila) [Source:HGNC Symbol;Acc:16272]	protein_coding	0.307492	0.334607	0.483568	0.696222	1.15017	0.680198	0.629819	0.545987	0.531311	2.38475	3
ENSG00000197142	ACSL5	acyl-CoA synthetase long-chain family member 5 [Source:HGNC Symbol;Acc:16526]	protein_coding	0.102847	0.135539	0.264667	0.267737	0.332913	0.304826	0.287838	0.27226	0.253571	0.623883	3
ENSG00000197191	C9orf169	chromosome 9 open reading frame 169 [Source:HGNC Symbol;Acc:30529]	protein_coding	0.440737	0.594403	0.675506	0.690699	0.994599	0.389323	0.497363	0.336159	1.03962	1.03014	3
ENSG00000197321	SVIL	supervillin [Source:HGNC Symbol;Acc:11480]	protein_coding	8.70376	15.7632	3.23485	4.91895	11.3467	18.7884	17.3528	11.5393	15.6346	57.5459	3
ENSG00000197409	HIST1H3D	histone cluster 1, H3d [Source:HGNC Symbol;Acc:4767]	protein_coding	0.285963	0.442226	0.654458	0.757771	1.00444	0.298961	0.322339	0.212256	0.227518	1.47059	3
ENSG00000197646	PDCD1LG2	programmed cell death 1 ligand 2 [Source:HGNC Symbol;Acc:18731]	protein_coding	25.9323	31.2135	11.5574	11.841	19.9494	14.8898	19.9748	19.2645	18.179	30.4541	3
ENSG00000197826	C4orf22	chromosome 4 open reading frame 22 [Source:HGNC Symbol;Acc:28554]	protein_coding	0.260756	0.293366	0.362816	0.424146	0.631161	0.357581	0.30575	0.282791	0.250403	0.881248	3
ENSG00000197852	FAM212B	family with sequence similarity 212, member B [Source:HGNC Symbol;Acc:28045]	protein_coding	1.85549	2.31418	0.705623	0.774847	0.877622	2.03114	1.90481	2.48498	4.48103	4.28031	3
ENSG00000198208	RPS6KL1	ribosomal protein S6 kinase-like 1 [Source:HGNC Symbol;Acc:20222]	protein_coding	0.147327	0.101266	0.0725544	0.0821849	0.203341	0.3568	0.323957	0.187028	0.262198	1.34222	3
ENSG00000198786	MT-ND5	mitochondrially encoded NADH dehydrogenase 5 [Source:HGNC Symbol;Acc:7461]	protein_coding	973.746	1166.39	686.962	1220.54	2146.56	964.545	1003.63	966.024	972.819	2388.19	3
ENSG00000198842	DUSP27	dual specificity phosphatase 27 (putative) [Source:HGNC Symbol;Acc:25034]	protein_coding	0.00192848	0.00252201	0	0.00509406	0.0757284	0.00455053	0.00215995	0.0104585	0.00757978	0.23457	3
ENSG00000198947	DMD	dystrophin [Source:HGNC Symbol;Acc:2928]	protein_coding	0.322899	0.298561	0.0738072	0.10162	0.231399	0.563092	0.649215	0.691196	0.867235	1.74608	3
ENSG00000203786	KPRP	keratinocyte proline-rich protein [Source:HGNC Symbol;Acc:31823]	protein_coding	0.00425035	0.00858497	0.00799141	0.00349272	1.56033	0.0482012	0.0777426	0.0400878	0.0218911	1.33304	3
ENSG00000203815	AL358813.2	Uncharacterized protein [Source:UniProtKB/TrEMBL;Acc:I3L0A6]	protein_coding	0.852932	0.820095	0.805854	0.694708	2.07504	0.854974	0.888982	0.9833	1.23328	1.89458	3
ENSG00000210112	J01415.7		Mt_tRNA	2.21457	3.33306	1.91662	4.21237	17.0753	5.28116	6.07385	5.72571	4.03571	12.6401	3
ENSG00000210196	J01415.23		Mt_tRNA	99.8748	123.158	145.045	145.908	411.836	89.3386	74.5649	70.0432	113.627	375.054	3
ENSG00000211445	GPX3	glutathione peroxidase 3 (plasma) [Source:HGNC Symbol;Acc:4555]	protein_coding	1.20225	1.03933	0.783976	1.09074	2.67407	1.31833	1.32068	0.80777	2.16705	9.47287	3
ENSG00000212724	KRTAP2-3	keratin associated protein 2-3 [Source:HGNC Symbol;Acc:18906]	protein_coding	9.13565	6.00776	28.4274	14.6661	15.0503	9.49246	14.7821	16.0959	7.27669	23.937	3
ENSG00000212725	KRTAP2-1	keratin associated protein 2-1 [Source:HGNC Symbol;Acc:16775]	protein_coding	1.17639	0.885905	2.79017	2.25805	1.98002	1.20523	2.3633	2.16316	0.780851	2.98684	3
ENSG00000213417	KRTAP2-4	keratin associated protein 2-4 [Source:HGNC Symbol;Acc:18891]	protein_coding	1.11495	0.648044	3.20745	2.16912	2.22504	0.922587	1.92857	2.26657	1.0567	2.96011	3
ENSG00000214518	KRTAP2-2	keratin associated protein 2-2 [Source:HGNC Symbol;Acc:18905]	protein_coding	0.817697	0.648164	2.43785	1.5779	1.52409	0.800761	1.48289	1.38355	0.625535	2.18119	3
ENSG00000221890	NPTXR	neuronal pentraxin receptor [Source:HGNC Symbol;Acc:7954]	protein_coding	1.6637	2.23548	1.30226	1.93596	8.49841	3.33447	2.94375	2.52077	3.20965	8.18434	3
ENSG00000222047	C10orf55	chromosome 10 open reading frame 55 [Source:HGNC Symbol;Acc:31008]	protein_coding	1.32118	0.375575	0.14413	0.153445	0.134094	2.612	1.80841	1.05272	1.38161	3.77096	3
ENSG00000223855	AC147651.3		lincRNA	0.0337177	0.114004	0.213941	0.246624	0.414117	0.196955	0.15588	0.191723	0.427284	0.560727	3
ENSG00000225015	SNX18P15	sorting nexin 18 pseudogene 15 [Source:HGNC Symbol;Acc:39623]	pseudogene	0.419188	0.699398	0.121494	0.123188	0.666485	0.0268679	0.0314987	0.0417201	0.146932	0.922045	3
ENSG00000225016	LINC00328-2P	long intergenic non-protein coding RNA 328-2, pseudogene [Source:HGNC Symbol;Acc:42027]	pseudogene	0.0379003	0	0.138279	0.165438	1.16102	0.182308	0.189035	0.310478	0.3528	2.83842	3
ENSG00000225345	SNX18P3	sorting nexin 18 pseudogene 3 [Source:HGNC Symbol;Acc:39611]	pseudogene	0.543779	0.348627	0.162109	0.128659	0.663928	0.458012	0.346906	0.456792	0.306254	0.7525	3
ENSG00000226067	FAM91A2	family with sequence similarity 91, member A2 [Source:HGNC Symbol;Acc:29050]	processed_transcript	0.815455	1.25247	0.524528	0.541943	1.62462	0.954165	0.808462	1.05792	1.20467	2.31216	3
ENSG00000227568	SNX18P26	sorting nexin 18 pseudogene 26 [Source:HGNC Symbol;Acc:39634]	pseudogene	0.0369243	0.0524751	0.0272464	0.0296282	0.460348	0.028653	0	0.0263945	0.0411323	0.974091	3
ENSG00000229373	LINC00452	long intergenic non-protein coding RNA 452 [Source:HGNC Symbol;Acc:42800]	lincRNA	0.161574	0.286942	0.299218	0.333465	0.770134	0.957428	1.39638	1.48669	1.28138	4.66752	3
ENSG00000229689	AC009237.1		protein_coding	0.955991	1.0237	0.43704	0.455158	1.0289	0.482317	0.65806	0.70721	0.635356	1.67257	3
ENSG00000230850	BX571672.1		lincRNA	0.0661517	0.125899	0.0213155	0.0432853	0.100283	0.0983244	0.128914	0.150505	0.171836	0.230343	3
ENSG00000230880	AL583842.3		lincRNA	0.0778899	0.120719	0.0747187	0.0852568	0.526009	0.190752	0.155785	0.200935	0.292231	0.65739	3
ENSG00000232224	LINC00202	long intergenic non-protein coding RNA 202 [Source:HGNC Symbol;Acc:24672]	lincRNA	0.0358988	0.0792582	0.017784	0.0391414	0.124642	0.089095	0.0479352	0.0235799	0.0353263	0.375852	3
ENSG00000232274	BX571672.2		lincRNA	0.0363746	0.0728732	0.0575331	0.0848045	1.16669	0.094217	0.113443	0.12926	0.291339	2.19019	3
ENSG00000232284	GNG12-AS1	GNG12 antisense RNA 1 [Source:HGNC Symbol;Acc:43938]	lincRNA	0.77029	0.685774	0.180681	0.294419	0.533018	0.746548	0.733887	0.538651	0.408462	1.15841	3
ENSG00000233005	AC067959.1		lincRNA	0.0314467	0.100332	0.138371	0.276342	0.317392	0.0674728	0.0625746	0.0192729	0.156691	2.43762	3
ENSG00000233218	SNX18P16	sorting nexin 18 pseudogene 16 [Source:HGNC Symbol;Acc:39624]	pseudogene	0.0695568	0.0866637	0.218169	0.19123	4.13291	0.277313	0.336424	0.49411	0.969993	9.307	3
ENSG00000233308	OSTN-AS1	OSTN antisense RNA 1 [Source:HGNC Symbol;Acc:41250]	antisense	0.218531	0.411324	0.206642	0.162857	0.775407	1.60447	2.52162	1.6308	2.14639	8.18283	3
ENSG00000234814	RP11-14C22.4		pseudogene	2.01238	3.38563	0.741265	1.08573	2.47373	3.64371	3.31307	2.30995	3.0775	11.1983	3
ENSG00000235501	RP4-639F20.1		antisense	1.43971	2.30822	3.08415	3.228	4.953	3.65876	4.08294	4.34306	4.34189	7.93103	3
ENSG00000235999	RP11-403I13.8		processed_transcript	0.660943	0.976927	0.439453	0.492469	1.57816	0.739515	0.631166	0.714224	1.18482	1.63427	3
ENSG00000236333	TRHDE-AS1	TRHDE antisense RNA 1 [Source:HGNC Symbol;Acc:27471]	lincRNA	3.69698	4.46741	1.62547	1.96433	2.44643	2.98294	4.97774	4.66797	3.81933	7.35984	3
ENSG00000236557	CR381653.1	Uncharacterized protein [Source:UniProtKB/TrEMBL;Acc:H0Y7Y6]	protein_coding	0.417567	0.484246	0.187392	0.273208	1.8405	0.161612	0.098019	0.122681	0.12077	1.62489	3
ENSG00000236914	RP11-1008C21.2		lincRNA	0.25254	0.257889	0.250755	0.402395	0.900671	0.351272	0.343145	0.360771	0.601998	0.706667	3
ENSG00000238261	BX004987.5		lincRNA	0.0571778	0.0545276	0.0335827	0.0796357	1.08002	0.09106	0.0975821	0.124986	0.303047	2.28982	3
ENSG00000240476	CTD-2021J15.2		lincRNA	0.189818	0.303823	0.0276664	0.0183204	0.711164	1.05509	1.26964	0.960267	0.826782	5.85986	3
ENSG00000241644	INMT	indolethylamine N-methyltransferase [Source:HGNC Symbol;Acc:6069]	protein_coding	0.372152	0.970281	0.804005	1.04867	17.6971	9.54365	10.8506	7.72401	9.35909	29.4562	3
ENSG00000241978	AKAP2	A kinase (PRKA) anchor protein 2 [Source:HGNC Symbol;Acc:372]	protein_coding	0.267193	0.234826	0.10525	0.103167	0.128934	0.340969	0.434036	0.386094	0.227925	0.62304	3
ENSG00000243797	CTB-111H14.1		processed_transcript	0.13623	0.15428	0.0257261	0.00637695	0.16787	0.141643	0.202369	0.0882247	0.144076	0.450881	3
ENSG00000247157	RP11-434C1.1		lincRNA	0.127602	0.287502	0.230854	0.350936	0.541221	0.423559	0.384596	0.279537	0.541694	1.04616	3
ENSG00000248433	AL583842.7		pseudogene	0.00550453	0.00535341	0.00498327	0.0186036	0.356593	0.00973513	0	0.0209987	0.0179109	0.522641	3
ENSG00000248445	CTB-118N6.3		antisense	0.0952364	0.104564	0.161282	0.331151	0.134081	0.22722	0.246393	0.534883	0.512043	0.507515	3
ENSG00000248923	MTND5P11	MT-ND5 pseudogene 11 [Source:HGNC Symbol;Acc:42273]	pseudogene	25.8677	29.7271	17.6206	32.1498	53.9642	33.3637	34.3951	33.552	32.6306	80.3263	3
ENSG00000249242	TMEM150C	transmembrane protein 150C [Source:HGNC Symbol;Acc:37263]	protein_coding	0.48646	0.698619	0.0378977	0.05759	0.344811	0.249181	0.0858919	0.0981628	0.0988602	0.612099	3
ENSG00000250337	RP11-46C20.1		lincRNA	0.036604	0.104086	0.621697	1.07804	3.16076	0.244202	0.23308	0.671674	1.07097	6.14903	3
ENSG00000251541	RP11-1281K21.5		pseudogene	0	0	0.288033	0.251775	7.56582	0.581144	0.261574	1.2861	2.34453	27.6913	3
ENSG00000253537	PCDHGA7	protocadherin gamma subfamily A, 7 [Source:HGNC Symbol;Acc:8705]	protein_coding	1.07442	1.45279	1.23671	1.87227	2.63376	1.91013	1.92803	2.75851	2.87175	4.49565	3
ENSG00000254300	RP11-706J10.1		lincRNA	0.104194	0.506986	0.269881	0.677291	0.40318	0.942485	1.36429	1.36621	2.66171	2.92586	3
ENSG00000259606	RP11-316E14.6		antisense	0.264868	0.659582	0.261007	0.437928	0.879357	0.326623	0.271479	0.389645	0.452273	1.08908	3
ENSG00000260359	RP11-4F5.2		lincRNA	0.136959	0.330164	0.307638	0.540937	1.17257	1.86421	1.2938	0.92656	2.03957	3.52146	3
ENSG00000260549	MT1L	metallothionein 1L (gene/pseudogene) [Source:HGNC Symbol;Acc:7404]	pseudogene	23.3831	9.46766	6.53099	3.09463	3.48206	22.8252	27.501	12.9786	8.83379	46.9094	3
ENSG00000261326	RP5-1057J7.6		lincRNA	0.551172	0.968383	0.618154	0.61615	1.27763	0.67426	1.05302	1.17415	1.28228	1.36116	3
ENSG00000000460	C1orf112	chromosome 1 open reading frame 112 [Source:HGNC Symbol;Acc:25565]	protein_coding	1.55389	0.802992	0.504907	0.593831	0.543397	1.01754	1.0955	1.21803	0.497879	0.608525	4
ENSG00000003096	KLHL13	kelch-like 13 (Drosophila) [Source:HGNC Symbol;Acc:22931]	protein_coding	1.04894	0.719552	0.176418	0.231444	0.436356	1.99598	1.55878	1.01817	0.290394	0.205537	4
ENSG00000004777	ARHGAP33	Rho GTPase activating protein 33 [Source:HGNC Symbol;Acc:23085]	protein_coding	2.95786	1.5667	1.49857	1.45365	1.14554	2.25068	2.52374	3.07177	1.29597	1.67257	4
ENSG00000005059	CCDC109B	coiled-coil domain containing 109B [Source:HGNC Symbol;Acc:26076]	protein_coding	3.6979	2.39982	2.95918	2.21583	1.06034	4.15971	3.56862	3.29654	2.02436	0.900972	4
ENSG00000006016	CRLF1	cytokine receptor-like factor 1 [Source:HGNC Symbol;Acc:2364]	protein_coding	2.1	0.45032	0.825178	0.339668	0.755791	0.585664	1.4781	0.80182	0.757805	0.0582087	4
ENSG00000006634	DBF4	DBF4 homolog (S. cerevisiae) [Source:HGNC Symbol;Acc:17364]	protein_coding	3.49321	1.48084	1.06426	0.826515	0.61927	3.1357	3.10459	3.32478	1.73946	0.857008	4
ENSG00000007968	E2F2	E2F transcription factor 2 [Source:HGNC Symbol;Acc:3114]	protein_coding	0.86888	0.174214	0.0522711	0.0309098	0.0705356	0.349098	0.564443	0.591918	0.0541987	0.113915	4
ENSG00000010292	NCAPD2	non-SMC condensin I complex, subunit D2 [Source:HGNC Symbol;Acc:24305]	protein_coding	23.2562	8.32876	4.56131	5.11358	5.55144	12.2458	13.9191	15.5703	5.53529	6.06118	4
ENSG00000011426	ANLN	anillin, actin binding protein [Source:HGNC Symbol;Acc:14082]	protein_coding	42.3538	9.65078	2.40098	1.23617	1.26824	22.9418	30.434	34.209	6.33666	6.77304	4
ENSG00000012048	BRCA1	breast cancer 1, early onset [Source:HGNC Symbol;Acc:1100]	protein_coding	4.08898	1.07874	0.519912	0.607667	0.817716	1.77798	1.95391	2.13739	0.687622	0.980994	4
ENSG00000013297	CLDN11	claudin 11 [Source:HGNC Symbol;Acc:8514]	protein_coding	25.147	36.8834	5.16014	3.75654	4.33353	55.8666	50.0691	32.8427	15.1125	5.30732	4
ENSG00000013810	TACC3	transforming, acidic coiled-coil containing protein 3 [Source:HGNC Symbol;Acc:11524]	protein_coding	13.1723	3.57971	1.33596	1.0005	0.962645	7.72446	9.58606	10.9189	2.96233	2.625	4
ENSG00000014138	POLA2	polymerase (DNA directed), alpha 2, accessory subunit [Source:HGNC Symbol;Acc:30073]	protein_coding	5.51378	2.4417	1.74487	1.93853	2.41992	3.49061	4.26465	4.3152	2.10224	3.17614	4
ENSG00000014257	ACPP	acid phosphatase, prostate [Source:HGNC Symbol;Acc:125]	protein_coding	1.17496	0.720169	0.0490144	0.0640484	0.129911	1.25612	1.17997	0.581894	0.435555	1.14083	4
ENSG00000023892	DEF6	differentially expressed in FDCP 6 homolog (mouse) [Source:HGNC Symbol;Acc:2760]	protein_coding	1.05367	0.687522	0.341344	0.29361	0.330358	1.12879	0.870028	0.965808	0.41356	0.289591	4
ENSG00000024526	DEPDC1	DEP domain containing 1 [Source:HGNC Symbol;Acc:22949]	protein_coding	5.57598	1.25387	0.338676	0.14453	0.127655	3.45364	3.97326	4.33845	1.14194	0.885912	4
ENSG00000034063	UHRF1	ubiquitin-like with PHD and ring finger domains 1 [Source:HGNC Symbol;Acc:12556]	processed_transcript	23.4488	5.66185	2.51387	1.6864	2.16111	11.8	16.2141	17.8779	3.85906	4.40516	4
ENSG00000035499	DEPDC1B	DEP domain containing 1B [Source:HGNC Symbol;Acc:24902]	protein_coding	2.21133	0.533078	0.144792	0.072184	0.0322061	1.24701	1.38405	1.52329	0.354485	0.262827	4
ENSG00000040275	CCDC99	coiled-coil domain containing 99 [Source:HGNC Symbol;Acc:26010]	protein_coding	9.01642	4.25642	2.63464	2.78775	2.38155	4.73197	5.72514	6.30507	2.70513	3.72843	4
ENSG00000041982	TNC	tenascin C [Source:HGNC Symbol;Acc:5318]	protein_coding	95.2059	47.7808	26.1071	21.126	61.7655	121.076	134.883	131.555	52.7622	79.7006	4
ENSG00000049541	RFC2	replication factor C (activator 1) 2, 40kDa [Source:HGNC Symbol;Acc:9970]	protein_coding	11.6988	4.16129	3.34534	2.84689	3.09114	6.32126	7.92437	8.41311	3.6633	4.11617	4
ENSG00000051180	RAD51	RAD51 homolog (S. cerevisiae) [Source:HGNC Symbol;Acc:9817]	protein_coding	4.13248	1.33805	0.715408	0.576348	0.808442	2.05411	2.76902	3.08318	0.961042	1.10962	4
ENSG00000051341	POLQ	polymerase (DNA directed), theta [Source:HGNC Symbol;Acc:9186]	protein_coding	2.37445	0.541858	0.14458	0.0961938	0.152257	1.43042	1.50274	1.66198	0.298294	0.383285	4
ENSG00000054654	SYNE2	spectrin repeat containing, nuclear envelope 2 [Source:HGNC Symbol;Acc:17084]	protein_coding	0.684167	0.267061	0.192912	0.210007	0.183743	0.768651	0.709266	0.720593	0.359507	0.247473	4
ENSG00000061337	LZTS1	leucine zipper, putative tumor suppressor 1 [Source:HGNC Symbol;Acc:13861]	protein_coding	3.10691	1.37209	1.03836	0.9075	0.428328	3.60745	4.39173	4.10225	1.94931	2.98589	4
ENSG00000062524	LTK	leukocyte receptor tyrosine kinase [Source:HGNC Symbol;Acc:6721]	protein_coding	2.74519	2.67	0.124091	0.109894	0.110994	1.00507	0.755803	1.611	2.99768	0.366651	4
ENSG00000062822	POLD1	polymerase (DNA directed), delta 1, catalytic subunit [Source:HGNC Symbol;Acc:9175]	protein_coding	9.964	3.78434	2.49568	2.00967	2.35338	6.1622	7.10333	7.6394	3.14817	3.28773	4
ENSG00000065328	MCM10	minichromosome maintenance complex component 10 [Source:HGNC Symbol;Acc:18043]	protein_coding	3.67552	0.663673	0.145006	0.111205	0.137969	1.74264	2.46175	2.69147	0.319296	0.386065	4
ENSG00000066279	ASPM	asp (abnormal spindle) homolog, microcephaly associated (Drosophila) [Source:HGNC Symbol;Acc:19048]	protein_coding	10.6892	2.73832	1.52462	1.91535	0.698437	4.79809	5.74394	6.73113	1.22504	1.30468	4
ENSG00000068489	PRR11	proline rich 11 [Source:HGNC Symbol;Acc:25619]	protein_coding	17.6353	4.75955	1.03288	1.21483	1.02867	10.5849	12.3211	15.0771	3.82649	6.06536	4
ENSG00000069482	GAL	galanin prepropeptide [Source:HGNC Symbol;Acc:4114]	protein_coding	2.38405	0.52845	0.127071	0.0144751	0.0434982	1.66679	1.99677	0.335358	0.23727	0.0232245	4
ENSG00000071539	TRIP13	thyroid hormone receptor interactor 13 [Source:HGNC Symbol;Acc:12307]	protein_coding	11.0286	2.97585	0.889432	0.676801	0.827714	5.62264	6.68987	7.23121	2.22972	1.62163	4
ENSG00000072571	HMMR	hyaluronan-mediated motility receptor (RHAMM) [Source:HGNC Symbol;Acc:5012]	protein_coding	6.44482	1.45999	0.333696	0.184904	0.226653	4.1787	4.86319	5.29877	1.30152	1.11377	4
ENSG00000073111	MCM2	minichromosome maintenance complex component 2 [Source:HGNC Symbol;Acc:6944]	protein_coding	15.0816	3.72893	1.89901	1.67595	2.35137	6.28923	7.70991	8.20899	2.31498	2.75815	4
ENSG00000075218	GTSE1	G-2 and S-phase expressed 1 [Source:HGNC Symbol;Acc:13698]	protein_coding	8.001	1.92345	0.491633	0.282127	0.387305	4.49821	5.6869	6.35376	1.31165	1.02102	4
ENSG00000075702	WDR62	WD repeat domain 62 [Source:HGNC Symbol;Acc:24502]	protein_coding	3.58032	0.697301	0.275357	0.187544	0.197753	2.29148	3.01834	3.14943	0.836518	0.838553	4
ENSG00000076003	MCM6	minichromosome maintenance complex component 6 [Source:HGNC Symbol;Acc:6949]	protein_coding	20.8756	8.32334	6.60039	6.66681	6.93997	9.88326	11.7176	11.9122	4.87632	5.03205	4
ENSG00000076382	SPAG5	sperm associated antigen 5 [Source:HGNC Symbol;Acc:13452]	protein_coding	13.8471	3.31548	0.952087	0.607751	0.73009	8.70437	10.6793	11.3904	2.41137	2.01189	4
ENSG00000077152	UBE2T	ubiquitin-conjugating enzyme E2T (putative) [Source:HGNC Symbol;Acc:25009]	protein_coding	17.1035	5.20142	3.38067	2.26912	3.67988	13.3354	14.2667	15.7452	7.27192	5.63105	4
ENSG00000077312	SNRPA	small nuclear ribonucleoprotein polypeptide A [Source:HGNC Symbol;Acc:11151]	protein_coding	36.4723	17.9987	14.4129	11.1417	13.1231	31.7462	28.5802	30.1624	23.5702	14.5995	4
ENSG00000079616	KIF22	kinesin family member 22 [Source:HGNC Symbol;Acc:6391]	protein_coding	9.8	3.3724	3.08494	2.10355	1.9332	5.8587	6.878	7.64377	2.69016	2.77798	4
ENSG00000080839	RBL1	retinoblastoma-like 1 (p107) [Source:HGNC Symbol;Acc:9893]	protein_coding	3.57182	1.38479	0.772585	0.89579	1.21774	2.3223	2.88903	3.06567	1.26648	1.5315	4
ENSG00000080986	NDC80	NDC80 kinetochore complex component homolog (S. cerevisiae) [Source:HGNC Symbol;Acc:16909]	protein_coding	13.7016	3.60275	1.35128	0.571231	0.556743	7.42062	8.56018	9.57769	2.3666	2.11681	4
ENSG00000082126	MPP4	membrane protein, palmitoylated 4 (MAGUK p55 subfamily member 4) [Source:HGNC Symbol;Acc:13680]	protein_coding	0.783238	0.395614	0.216098	0.217946	0.62261	0.964364	1.2175	1.06925	0.50907	0.826799	4
ENSG00000083807	SLC27A5	solute carrier family 27 (fatty acid transporter), member 5 [Source:HGNC Symbol;Acc:10999]	protein_coding	1.72063	0.895928	0.668905	0.381536	0.632191	0.822087	0.711426	0.645518	0.803668	0.343875	4
ENSG00000085840	ORC1	origin recognition complex, subunit 1 [Source:HGNC Symbol;Acc:8487]	protein_coding	3.31347	0.672063	0.209386	0.264597	0.270108	1.42859	2.08953	2.73988	0.392867	0.461693	4
ENSG00000085999	RAD54L	RAD54-like (S. cerevisiae) [Source:HGNC Symbol;Acc:9826]	protein_coding	3.73529	0.871494	0.381884	0.232778	0.359081	2.1073	2.56544	2.78218	0.587185	0.524755	4
ENSG00000087303	NID2	nidogen 2 (osteonidogen) [Source:HGNC Symbol;Acc:13389]	protein_coding	89.0046	115.418	35.5954	41.2188	38.4262	84.5308	84.7735	59.0886	40.9716	20.1137	4
ENSG00000087586	AURKA	aurora kinase A [Source:HGNC Symbol;Acc:11393]	protein_coding	24.7352	10.2592	1.78791	1.30804	1.44608	13.7934	18.3774	14.9074	5.78554	8.40681	4
ENSG00000088325	TPX2	TPX2, microtubule-associated, homolog (Xenopus laevis) [Source:HGNC Symbol;Acc:1249]	protein_coding	39.6285	10.5653	3.59722	2.65867	2.19093	22.2574	24.9943	28.5829	7.31695	6.31131	4
ENSG00000088882	CPXM1	carboxypeptidase X (M14 family), member 1 [Source:HGNC Symbol;Acc:15771]	protein_coding	8.05278	11.1647	0.569883	0.427443	0.328291	7.20074	6.01571	3.35259	2.17289	0.0722593	4
ENSG00000089472	HEPH	hephaestin [Source:HGNC Symbol;Acc:4866]	protein_coding	3.67735	5.55113	0.94567	1.09651	1.43594	4.895	4.5528	2.83999	1.56877	0.0394211	4
ENSG00000089685	BIRC5	baculoviral IAP repeat containing 5 [Source:HGNC Symbol;Acc:593]	protein_coding	29.1276	6.45118	2.18571	0.808889	0.602692	14.7536	16.8168	18.0106	4.73719	2.88236	4
ENSG00000090447	TFAP4	transcription factor AP-4 (activating enhancer binding protein 4) [Source:HGNC Symbol;Acc:11745]	protein_coding	2.79621	1.75803	1.82168	1.34026	1.31718	2.05948	1.92596	1.62393	1.78238	0.927544	4
ENSG00000090889	KIF4A	kinesin family member 4A [Source:HGNC Symbol;Acc:13339]	protein_coding	7.76557	1.89922	0.513732	0.196283	0.191035	5.55347	6.58845	7.13175	1.57364	1.46889	4
ENSG00000091651	ORC6	origin recognition complex, subunit 6 [Source:HGNC Symbol;Acc:17151]	protein_coding	4.13044	1.27267	0.734825	0.762947	0.888004	3.01191	3.3791	3.63818	1.33536	1.51446	4
ENSG00000092470	WDR76	WD repeat domain 76 [Source:HGNC Symbol;Acc:25773]	protein_coding	5.40195	1.446	0.685675	0.633154	1.01143	3.11879	3.96032	4.18686	1.0773	1.31967	4
ENSG00000092853	CLSPN	claspin [Source:HGNC Symbol;Acc:19715]	protein_coding	3.86299	0.824552	0.205748	0.140427	0.287912	2.2794	3.07901	3.57288	0.404403	0.795536	4
ENSG00000093009	CDC45	cell division cycle 45 homolog (S. cerevisiae) [Source:HGNC Symbol;Acc:1739]	protein_coding	7.18643	1.33352	0.342346	0.202127	0.413897	4.27553	5.17871	5.26341	0.972165	0.844953	4
ENSG00000094804	CDC6	cell division cycle 6 homolog (S. cerevisiae) [Source:HGNC Symbol;Acc:1744]	protein_coding	11.9726	2.57806	0.769471	0.663889	1.56648	8.48332	7.40065	8.4741	4.18336	2.24269	4
ENSG00000095752	IL11	interleukin 11 [Source:HGNC Symbol;Acc:5966]	protein_coding	22.785	6.30214	8.77776	6.10111	2.57722	19.9339	21.2957	12.5033	9.10935	9.94419	4
ENSG00000096060	FKBP5	FK506 binding protein 5 [Source:HGNC Symbol;Acc:3721]	protein_coding	2.47129	1.22818	0.411298	0.356025	0.210877	1.63077	1.78054	1.81593	0.877062	0.620256	4
ENSG00000097046	CDC7	cell division cycle 7 homolog (S. cerevisiae) [Source:HGNC Symbol;Acc:1745]	protein_coding	2.7388	1.38137	0.583997	0.697897	0.979254	1.67982	1.93018	1.87406	0.781132	0.790739	4
ENSG00000100162	CENPM	centromere protein M [Source:HGNC Symbol;Acc:18352]	protein_coding	7.95913	1.52911	0.751207	0.225296	0.379649	3.42078	4.13904	4.41217	1.00532	0.731038	4
ENSG00000100206	DMC1	DMC1 dosage suppressor of mck1 homolog, meiosis-specific homologous recombination (yeast) [Source:HGNC Symbol;Acc:2927]	protein_coding	1.04995	0.284023	0.205996	0.169171	0.209597	0.373075	0.397349	0.323714	0.109547	0.117252	4
ENSG00000100285	NEFH	neurofilament, heavy polypeptide [Source:HGNC Symbol;Acc:7737]	protein_coding	1.49313	0.723847	0.430487	0.328864	0.655175	1.67494	1.87288	1.55279	0.703692	0.304637	4
ENSG00000100297	MCM5	minichromosome maintenance complex component 5 [Source:HGNC Symbol;Acc:6948]	protein_coding	15.809	3.51762	1.47335	1.37872	2.23419	5.97551	8.03826	8.4205	1.94463	2.63894	4
ENSG00000100479	POLE2	polymerase (DNA directed), epsilon 2, accessory subunit [Source:HGNC Symbol;Acc:9178]	protein_coding	2.7444	0.629319	0.253169	0.139743	0.277165	1.6285	1.92532	2.07493	0.612668	0.497883	4
ENSG00000100526	CDKN3	cyclin-dependent kinase inhibitor 3 [Source:HGNC Symbol;Acc:1791]	protein_coding	13.87	2.82137	1.50234	0.835937	1.14413	6.14217	6.73277	7.93881	2.12626	1.88642	4
ENSG00000100629	CEP128	centrosomal protein 128kDa [Source:HGNC Symbol;Acc:20359]	protein_coding	0.863549	0.297773	0.217042	0.212079	0.215652	0.634733	0.759185	0.754776	0.221119	0.210737	4
ENSG00000100749	VRK1	vaccinia related kinase 1 [Source:HGNC Symbol;Acc:12718]	protein_coding	5.50148	2.51981	2.00869	1.82995	2.12082	4.1342	4.44441	4.50154	2.06166	2.09442	4
ENSG00000101003	GINS1	GINS complex subunit 1 (Psf1 homolog) [Source:HGNC Symbol;Acc:28980]	protein_coding	3.78952	1.2766	0.714655	0.59976	0.705928	1.94675	2.45523	2.66733	0.891828	0.899244	4
ENSG00000101057	MYBL2	v-myb myeloblastosis viral oncogene homolog (avian)-like 2 [Source:HGNC Symbol;Acc:7548]	protein_coding	17.8682	3.29808	0.706506	0.325825	0.284681	6.95355	10.0467	12.3223	1.53826	1.22746	4
ENSG00000101311	FERMT1	fermitin family member 1 [Source:HGNC Symbol;Acc:15889]	protein_coding	1.17073	0.60052	0.149544	0.141305	0.0602955	0.997766	0.906153	0.756402	0.530436	0.496595	4
ENSG00000101412	E2F1	E2F transcription factor 1 [Source:HGNC Symbol;Acc:3113]	protein_coding	9.27056	2.11713	1.24925	1.00982	3.17897	5.21916	6.93713	6.46814	1.70505	3.00781	4
ENSG00000101447	FAM83D	family with sequence similarity 83, member D [Source:HGNC Symbol;Acc:16122]	protein_coding	12.0429	2.79816	0.964895	0.480788	0.288892	7.00854	8.74012	11.2014	2.4076	2.19586	4
ENSG00000101868	POLA1	polymerase (DNA directed), alpha 1, catalytic subunit [Source:HGNC Symbol;Acc:9173]	protein_coding	5.22232	1.98419	1.16887	1.43514	1.50378	2.32352	2.65335	2.80391	1.00545	1.35418	4
ENSG00000102384	CENPI	centromere protein I [Source:HGNC Symbol;Acc:3968]	protein_coding	3.87085	1.34531	0.520899	0.622673	0.676444	2.87922	3.42294	3.89407	1.38993	1.22493	4
ENSG00000102879	CORO1A	coronin, actin binding protein, 1A [Source:HGNC Symbol;Acc:2252]	protein_coding	0.714811	0.176511	0.0913704	0.0582617	0.0451339	0.626512	0.581151	0.835913	0.449052	0.142163	4
ENSG00000102890	ELMO3	engulfment and cell motility 3 [Source:HGNC Symbol;Acc:17289]	protein_coding	0.810057	0.554533	0.587917	0.49987	0.380404	0.613175	0.726699	0.969878	0.844783	0.361655	4
ENSG00000103489	XYLT1	xylosyltransferase I [Source:HGNC Symbol;Acc:15516]	protein_coding	6.57589	2.98519	1.7884	2.02227	0.926095	3.81591	3.82963	3.58224	1.38236	3.86463	4
ENSG00000103995	CEP152	centrosomal protein 152kDa [Source:HGNC Symbol;Acc:29298]	protein_coding	1.75829	0.848674	0.572682	0.75065	0.652798	1.50285	1.43726	1.53283	0.725574	0.815735	4
ENSG00000104147	OIP5	Opa interacting protein 5 [Source:HGNC Symbol;Acc:20300]	protein_coding	3.07767	0.810215	0.313208	0.313653	0.286709	1.34267	1.46361	1.51372	0.518283	0.398587	4
ENSG00000104738	MCM4	minichromosome maintenance complex component 4 [Source:HGNC Symbol;Acc:6947]	protein_coding	20.3697	5.89254	2.63419	2.51793	3.52612	8.77761	10.8628	11.7321	3.30869	7.36172	4
ENSG00000104889	RNASEH2A	ribonuclease H2, subunit A [Source:HGNC Symbol;Acc:18518]	protein_coding	29.5182	7.91808	5.49688	3.16695	4.06782	14.8366	17.2092	17.8719	7.00766	6.818	4
ENSG00000105011	ASF1B	ASF1 anti-silencing function 1 homolog B (S. cerevisiae) [Source:HGNC Symbol;Acc:20996]	protein_coding	10.7157	2.195	0.744191	0.445267	0.847838	4.2853	5.5193	6.60796	1.28259	1.75509	4
ENSG00000105202	FBL	fibrillarin [Source:HGNC Symbol;Acc:3599]	protein_coding	95.8424	49.9016	47.5894	28.5118	20.9407	66.196	66.5804	66.3776	49.3346	28.9236	4
ENSG00000105248	CCDC94	coiled-coil domain containing 94 [Source:HGNC Symbol;Acc:25518]	protein_coding	10.3836	6.13057	8.57523	6.21756	4.45751	7.76561	7.71783	7.63978	7.01938	3.76563	4
ENSG00000105486	LIG1	ligase I, DNA, ATP-dependent [Source:HGNC Symbol;Acc:6598]	protein_coding	10.7059	3.62567	1.91205	1.75476	1.79147	5.33204	6.65166	6.96475	2.46406	2.6907	4
ENSG00000106462	EZH2	enhancer of zeste homolog 2 (Drosophila) [Source:HGNC Symbol;Acc:3527]	protein_coding	6.29782	2.40628	1.43686	1.1733	0.678186	4.73891	5.04403	5.48838	1.99322	1.04535	4
ENSG00000109674	NEIL3	nei endonuclease VIII-like 3 (E. coli) [Source:HGNC Symbol;Acc:24573]	protein_coding	3.01508	1.38895	0.416663	0.375724	0.211038	1.46774	1.40731	1.76477	0.464702	0.416855	4
ENSG00000109685	WHSC1	Wolf-Hirschhorn syndrome candidate 1 [Source:HGNC Symbol;Acc:12766]	protein_coding	9.68167	4.46763	2.95106	3.16293	2.99685	7.28827	7.86876	7.80603	3.44126	3.86254	4
ENSG00000109805	NCAPG	non-SMC condensin I complex, subunit G [Source:HGNC Symbol;Acc:24304]	protein_coding	9.37667	2.16338	0.597383	0.366967	0.311456	4.65591	5.8758	6.70218	1.3442	1.2472	4
ENSG00000111206	FOXM1	forkhead box M1 [Source:HGNC Symbol;Acc:3818]	protein_coding	16.9345	3.8432	1.35674	0.956235	0.778393	8.83415	10.4742	11.581	2.53919	2.11902	4
ENSG00000111247	RAD51AP1	RAD51 associated protein 1 [Source:HGNC Symbol;Acc:16956]	protein_coding	6.87745	1.65293	0.639338	0.47619	0.666898	3.91706	4.28448	4.60771	1.24549	1.01	4
ENSG00000111331	OAS3	2'-5'-oligoadenylate synthetase 3, 100kDa [Source:HGNC Symbol;Acc:8088]	protein_coding	0.947602	0.609066	0.382354	0.336771	0.247304	0.920118	1.01873	1.38456	0.573394	0.414672	4
ENSG00000111445	RFC5	replication factor C (activator 1) 5, 36.5kDa [Source:HGNC Symbol;Acc:9973]	protein_coding	5.69243	2.39934	2.14006	1.86774	1.88472	3.59109	4.0598	4.22627	2.02501	2.10153	4
ENSG00000111602	TIMELESS	timeless homolog (Drosophila) [Source:HGNC Symbol;Acc:11813]	protein_coding	10.7372	3.57288	1.58598	1.87474	2.22523	6.9215	8.13689	8.26631	3.43376	2.78104	4
ENSG00000111665	CDCA3	cell division cycle associated 3 [Source:HGNC Symbol;Acc:14624]	protein_coding	3.33871	0.760722	0.408674	0.187812	0.270183	1.83454	2.13846	2.53482	0.767188	0.506931	4
ENSG00000112029	FBXO5	F-box protein 5 [Source:HGNC Symbol;Acc:13584]	protein_coding	5.2085	1.70595	1.02939	0.951924	0.78758	3.7046	4.22339	5.33884	1.66026	1.28079	4
ENSG00000112118	MCM3	minichromosome maintenance complex component 3 [Source:HGNC Symbol;Acc:6945]	protein_coding	29.3036	9.31445	5.22266	5.05703	7.51066	12.4223	16.0436	16.0136	4.68412	6.81482	4
ENSG00000112297	AIM1	absent in melanoma 1 [Source:HGNC Symbol;Acc:356]	protein_coding	11.2493	6.61842	1.81488	1.71849	1.49673	3.1248	2.67308	3.58096	3.38954	0.516593	4
ENSG00000112312	GMNN	geminin, DNA replication inhibitor [Source:HGNC Symbol;Acc:17493]	protein_coding	7.84159	3.10598	2.42961	1.82815	2.16941	6.15843	6.85381	7.29905	4.09268	2.21679	4
ENSG00000112742	TTK	TTK protein kinase [Source:HGNC Symbol;Acc:12401]	protein_coding	4.5775	1.07378	0.287989	0.176719	0.185916	2.93851	3.2295	3.59028	0.896313	0.709716	4
ENSG00000112877	CEP72	centrosomal protein 72kDa [Source:HGNC Symbol;Acc:25547]	protein_coding	0.946375	0.475007	0.222034	0.241592	0.253186	0.583402	0.626737	0.572457	0.279163	0.391068	4
ENSG00000112984	KIF20A	kinesin family member 20A [Source:HGNC Symbol;Acc:9787]	protein_coding	28.865	5.55364	1.55099	0.555986	0.54445	12.5273	15.1764	18.7455	3.40932	2.39718	4
ENSG00000113368	LMNB1	lamin B1 [Source:HGNC Symbol;Acc:6637]	protein_coding	17.3483	3.49977	1.10657	0.59055	0.713135	9.45151	11.9175	13.5778	2.54696	1.5757	4
ENSG00000113448	PDE4D	phosphodiesterase 4D, cAMP-specific [Source:HGNC Symbol;Acc:8783]	protein_coding	1.01671	0.436766	0.125166	0.239601	0.168414	0.945043	0.528931	0.189286	0.405504	0.0970644	4
ENSG00000113645	WWC1	WW and C2 domain containing 1 [Source:HGNC Symbol;Acc:29435]	protein_coding	2.15746	1.34605	0.196057	0.21403	0.13855	1.25318	1.3847	1.21699	0.453655	0.530989	4
ENSG00000113810	SMC4	structural maintenance of chromosomes 4 [Source:HGNC Symbol;Acc:14013]	protein_coding	16.529	6.19915	4.23325	5.21402	4.86978	9.82049	11.0647	12.338	3.55077	3.09498	4
ENSG00000114346	ECT2	epithelial cell transforming sequence 2 oncogene [Source:HGNC Symbol;Acc:3155]	protein_coding	11.8491	6.03846	4.22535	5.2069	5.50112	8.30311	9.8629	9.68888	4.38096	7.2784	4
ENSG00000115163	CENPA	centromere protein A [Source:HGNC Symbol;Acc:1851]	protein_coding	4.96083	1.16142	0.515403	0.170359	0.222619	3.86622	3.68536	4.51158	1.38939	0.836466	4
ENSG00000117399	CDC20	cell division cycle 20 homolog (S. cerevisiae) [Source:HGNC Symbol;Acc:1723]	protein_coding	38.915	6.7581	1.86763	0.686535	0.596456	17.7316	22.6412	26.9289	5.44249	2.90307	4
ENSG00000117650	NEK2	NIMA (never in mitosis gene a)-related kinase 2 [Source:HGNC Symbol;Acc:7745]	protein_coding	5.37976	1.21666	0.395563	0.162925	0.21221	3.04509	3.4704	3.76591	1.09772	0.738015	4
ENSG00000117724	CENPF	centromere protein F, 350/400kDa (mitosin) [Source:HGNC Symbol;Acc:1857]	protein_coding	12.6395	2.84698	0.707638	0.339256	0.36837	9.57669	10.7845	11.6368	2.53632	2.29992	4
ENSG00000118193	KIF14	kinesin family member 14 [Source:HGNC Symbol;Acc:19181]	protein_coding	4.12849	0.933726	0.188023	0.0784874	0.103759	2.4015	2.63867	3.06478	0.719123	0.674047	4
ENSG00000118407	FILIP1	filamin A interacting protein 1 [Source:HGNC Symbol;Acc:21015]	protein_coding	0.323108	0.249276	0.0434904	0.0421298	0.223694	0.244788	0.242813	0.247725	0.0841064	0.16727	4
ENSG00000119397	CNTRL	centriolin [Source:HGNC Symbol;Acc:1858]	protein_coding	1.98719	0.977836	0.609997	0.70637	0.641398	1.39946	1.49225	1.59829	0.677178	0.573739	4
ENSG00000119969	HELLS	helicase, lymphoid-specific [Source:HGNC Symbol;Acc:4861]	protein_coding	2.52246	0.837325	0.360928	0.358801	0.542879	1.91247	2.15803	2.0124	0.576106	0.681895	4
ENSG00000120217	CD274	CD274 molecule [Source:HGNC Symbol;Acc:17635]	protein_coding	4.15091	2.07481	0.607197	0.813126	0.65155	7.2965	7.9293	8.09303	2.62822	2.63016	4
ENSG00000120756	PLS1	plastin 1 [Source:HGNC Symbol;Acc:9090]	protein_coding	0.368788	0.252446	0.0894286	0.107962	0.311477	0.274437	0.28502	0.340286	0.15561	0.332227	4
ENSG00000120802	TMPO	thymopoietin [Source:HGNC Symbol;Acc:11875]	protein_coding	13.0689	4.31139	4.53458	3.87649	2.71848	8.68612	9.29147	10.464	3.74759	3.12114	4
ENSG00000121152	NCAPH	non-SMC condensin I complex, subunit H [Source:HGNC Symbol;Acc:1112]	protein_coding	7.39786	1.53058	0.307901	0.172581	0.223604	3.83991	5.15977	6.03207	1.21109	0.978428	4
ENSG00000121211	MND1	meiotic nuclear divisions 1 homolog (S. cerevisiae) [Source:HGNC Symbol;Acc:24839]	protein_coding	2.54713	0.51821	0.437487	0.148377	0.254168	1.63821	1.67185	1.88043	0.472217	0.312267	4
ENSG00000121281	ADCY7	adenylate cyclase 7 [Source:HGNC Symbol;Acc:238]	protein_coding	4.04793	3.54644	2.43349	2.25413	1.03695	3.67287	3.39388	4.04256	2.82657	1.26185	4
ENSG00000121621	KIF18A	kinesin family member 18A [Source:HGNC Symbol;Acc:29441]	protein_coding	3.15354	1.16095	1.36566	1.21683	0.404692	3.09329	3.62734	3.54788	1.53917	1.03641	4
ENSG00000122483	CCDC18	coiled-coil domain containing 18 [Source:HGNC Symbol;Acc:30370]	protein_coding	2.85601	1.3612	0.509935	0.57175	0.459875	2.10204	1.99913	2.05375	1.17319	0.979819	4
ENSG00000122952	ZWINT	ZW10 interactor [Source:HGNC Symbol;Acc:13195]	protein_coding	26.2847	6.21701	2.33469	1.66721	2.07827	12.4591	16.4063	17.4974	3.935	3.90335	4
ENSG00000122966	CIT	citron (rho-interacting, serine/threonine kinase 21) [Source:HGNC Symbol;Acc:1985]	protein_coding	4.21289	1.53057	0.344022	0.331942	0.331957	2.26027	2.58555	2.87583	0.667472	0.613408	4
ENSG00000123213	NLN	neurolysin (metallopeptidase M3 family) [Source:HGNC Symbol;Acc:16058]	protein_coding	6.34915	4.06717	2.76642	2.65024	2.86752	4.5188	4.74643	4.90482	3.044	2.04558	4
ENSG00000123219	CENPK	centromere protein K [Source:HGNC Symbol;Acc:29479]	protein_coding	4.06907	1.35715	0.464937	0.355032	0.515823	2.24135	2.46374	2.52379	0.655621	0.679056	4
ENSG00000123416	TUBA1B	tubulin, alpha 1b [Source:HGNC Symbol;Acc:18809]	protein_coding	81.1877	33.6251	19.8968	16.3317	16.518	61.8702	76.2853	75.5754	31.8998	31.6768	4
ENSG00000123473	STIL	SCL/TAL1 interrupting locus [Source:HGNC Symbol;Acc:10879]	protein_coding	3.10798	1.2419	0.616646	0.722894	0.77015	1.73897	1.9693	2.25974	0.634102	0.982676	4
ENSG00000123485	HJURP	Holliday junction recognition protein [Source:HGNC Symbol;Acc:25444]	protein_coding	9.27457	2.2869	0.747081	0.448699	0.712997	7.57522	8.62553	9.99247	2.24624	2.56665	4
ENSG00000123560	PLP1	proteolipid protein 1 [Source:HGNC Symbol;Acc:9086]	protein_coding	0.677182	0.230049	0.016022	0.0198787	0.0259472	0.121546	0.0758725	0.0443337	0.0278856	0.0253244	4
ENSG00000123610	TNFAIP6	tumor necrosis factor, alpha-induced protein 6 [Source:HGNC Symbol;Acc:11898]	protein_coding	1.87123	1.15679	0.380448	0.208063	1.3423	2.19468	1.46153	0.8818	0.994088	0.0133895	4
ENSG00000123975	CKS2	CDC28 protein kinase regulatory subunit 2 [Source:HGNC Symbol;Acc:2000]	protein_coding	64.1953	26.6578	21.3801	13.474	15.5037	61.6646	59.25	55.9521	35.8085	24.6854	4
ENSG00000125247	TMTC4	transmembrane and tetratricopeptide repeat containing 4 [Source:HGNC Symbol;Acc:25904]	protein_coding	1.73403	1.4999	1.00008	0.997159	0.810155	2.23615	1.84	1.74014	1.30232	1.02718	4
ENSG00000125319	C17orf53	chromosome 17 open reading frame 53 [Source:HGNC Symbol;Acc:28460]	protein_coding	1.96002	0.968467	0.396983	0.384379	0.432653	1.29869	1.48614	1.4835	0.692994	0.968352	4
ENSG00000125885	MCM8	minichromosome maintenance complex component 8 [Source:HGNC Symbol;Acc:16147]	protein_coding	6.55542	2.63079	1.30923	1.53333	2.03532	3.61681	4.15658	4.37076	1.43509	2.54195	4
ENSG00000126562	WNK4	WNK lysine deficient protein kinase 4 [Source:HGNC Symbol;Acc:14544]	protein_coding	13.6428	6.68273	0.802069	0.722002	0.603414	4.87439	5.17189	5.19966	1.78185	2.05428	4
ENSG00000126787	DLGAP5	discs, large (Drosophila) homolog-associated protein 5 [Source:HGNC Symbol;Acc:16864]	protein_coding	14.6779	3.3904	0.867829	0.299769	0.306389	7.80224	9.74171	10.7787	2.60489	1.91533	4
ENSG00000127423	AUNIP	aurora kinase A and ninein interacting protein [Source:HGNC Symbol;Acc:28363]	protein_coding	1.48995	0.621329	0.503325	0.376862	0.401678	0.721218	0.824787	0.815233	0.310503	0.393155	4
ENSG00000127564	PKMYT1	protein kinase, membrane associated tyrosine/threonine 1 [Source:HGNC Symbol;Acc:29650]	protein_coding	7.23394	1.42847	0.459032	0.236943	0.312445	2.52639	3.23489	4.10038	0.673042	0.794415	4
ENSG00000127586	CHTF18	CTF18, chromosome transmission fidelity factor 18 homolog (S. cerevisiae) [Source:HGNC Symbol;Acc:18435]	protein_coding	4.23967	1.31174	0.575366	0.640508	0.758765	2.61787	3.40689	3.33379	1.0934	1.43445	4
ENSG00000128050	PAICS	phosphoribosylaminoimidazole carboxylase, phosphoribosylaminoimidazole succinocarboxamide synthetase [Source:HGNC Symbol;Acc:8587]	protein_coding	50.0751	23.0168	11.9972	10.1318	12.54	32.1455	33.3499	33.4635	20.2145	12.5539	4
ENSG00000128059	PPAT	phosphoribosyl pyrophosphate amidotransferase [Source:HGNC Symbol;Acc:9238]	protein_coding	3.95326	2.28755	1.17156	1.24885	1.70098	3.6773	3.39015	3.25677	2.68313	1.73129	4
ENSG00000128285	MCHR1	melanin-concentrating hormone receptor 1 [Source:HGNC Symbol;Acc:4479]	protein_coding	0.177857	0.0709397	0.0102408	0.00337907	0.00379624	0.105309	0.129815	0.111957	0.0572403	0.0139555	4
ENSG00000128340	RAC2	ras-related C3 botulinum toxin substrate 2 (rho family, small GTP binding protein Rac2) [Source:HGNC Symbol;Acc:9802]	protein_coding	7.63771	6.04838	3.22561	3.28436	2.95088	7.54583	7.87898	6.85421	3.29318	4.0383	4
ENSG00000128383	APOBEC3A	apolipoprotein B mRNA editing enzyme, catalytic polypeptide-like 3A [Source:HGNC Symbol;Acc:17343]	protein_coding	1.26422	0.257947	0.162985	0.0919873	0.0506771	0.597087	0.729855	0.770921	0.229082	0.139045	4
ENSG00000128408	RIBC2	RIB43A domain with coiled-coils 2 [Source:HGNC Symbol;Acc:13241]	protein_coding	1.23836	0.256792	0.11119	0.109869	0.160423	0.215681	0.261612	0.297394	0.0421013	0.051536	4
ENSG00000129173	E2F8	E2F transcription factor 8 [Source:HGNC Symbol;Acc:24727]	protein_coding	1.53979	0.270369	0.0357592	0.0289563	0.0299259	0.551987	0.830069	0.879393	0.104378	0.15179	4
ENSG00000129195	FAM64A	family with sequence similarity 64, member A [Source:HGNC Symbol;Acc:25483]	protein_coding	21.0838	3.76949	1.4596	0.335052	0.287462	9.77178	12.0816	14.7014	3.62864	1.48674	4
ENSG00000129534	MIS18BP1	MIS18 binding protein 1 [Source:HGNC Symbol;Acc:20190]	protein_coding	6.07333	3.22969	1.63385	1.9586	1.49852	2.96678	2.74855	3.24464	1.59774	2.01479	4
ENSG00000129810	SGOL1	shugoshin-like 1 (S. pombe) [Source:HGNC Symbol;Acc:25088]	protein_coding	1.45682	0.343758	0.0868483	0.0971632	0.0926948	1.0436	0.894492	1.18708	0.261986	0.217587	4
ENSG00000130816	DNMT1	DNA (cytosine-5-)-methyltransferase 1 [Source:HGNC Symbol;Acc:2976]	protein_coding	39.7521	17.2314	7.66246	7.93769	8.33503	25.1665	28.8002	29.913	11.9912	16.359	4
ENSG00000131153	GINS2	GINS complex subunit 2 (Psf2 homolog) [Source:HGNC Symbol;Acc:24575]	protein_coding	7.65785	1.44172	0.576557	0.424797	0.692429	3.66312	4.93667	5.85492	1.14299	1.43127	4
ENSG00000131351	HAUS8	HAUS augmin-like complex, subunit 8 [Source:HGNC Symbol;Acc:30532]	protein_coding	6.01498	2.03523	1.83423	1.60491	1.79469	3.14875	4.26372	5.05659	1.6788	1.91509	4
ENSG00000131459	GFPT2	glutamine-fructose-6-phosphate transaminase 2 [Source:HGNC Symbol;Acc:4242]	protein_coding	2.95325	2.61741	1.35326	1.27382	0.384192	2.80167	2.55904	2.55074	1.57708	0.488354	4
ENSG00000131470	PSMC3IP	PSMC3 interacting protein [Source:HGNC Symbol;Acc:17928]	protein_coding	5.46859	1.861	0.581482	0.528428	1.19184	3.15796	4.02782	4.43703	1.65136	2.1474	4
ENSG00000131477	RAMP2	receptor (G protein-coupled) activity modifying protein 2 [Source:HGNC Symbol;Acc:9844]	protein_coding	0.485708	0.165949	0.0445871	0.0784417	0.0863479	0.576602	0.32814	0.599734	0.345864	0.0938937	4
ENSG00000131747	TOP2A	topoisomerase (DNA) II alpha 170kDa [Source:HGNC Symbol;Acc:11989]	protein_coding	40.6071	9.60723	2.42803	1.65871	1.71784	24.706	29.6088	33.5958	7.65969	6.51611	4
ENSG00000132436	FIGNL1	fidgetin-like 1 [Source:HGNC Symbol;Acc:13286]	protein_coding	4.74686	2.31103	1.18117	1.2031	1.37659	2.80298	3.43525	3.58737	1.72683	1.68139	4
ENSG00000132780	NASP	nuclear autoantigenic sperm protein (histone-binding) [Source:HGNC Symbol;Acc:7644]	protein_coding	14.0137	6.11201	4.50502	4.01774	4.28407	11.232	13.4168	13.6386	6.74276	5.61754	4
ENSG00000132967	HMGB1P5	high mobility group box 1 pseudogene 5 [Source:HGNC Symbol;Acc:4997]	pseudogene	19.4825	7.74966	11.4045	9.09539	10.3413	15.27	15.4223	16.6317	12.2687	7.33196	4
ENSG00000133119	RFC3	replication factor C (activator 1) 3, 38kDa [Source:HGNC Symbol;Acc:9971]	protein_coding	7.35413	2.18082	1.61319	1.40285	1.23363	3.70972	5.14831	5.26842	1.53892	1.38936	4
ENSG00000134057	CCNB1	cyclin B1 [Source:HGNC Symbol;Acc:1579]	protein_coding	43.5809	11.6316	4.07037	2.48766	3.2087	24.735	29.2733	32.1855	9.38744	7.56187	4
ENSG00000134222	PSRC1	proline/serine-rich coiled-coil 1 [Source:HGNC Symbol;Acc:24472]	protein_coding	6.32264	2.43868	1.347	1.06501	1.15275	5.39544	6.05281	7.32831	3.25642	2.61538	4
ENSG00000134285	FKBP11	FK506 binding protein 11, 19 kDa [Source:HGNC Symbol;Acc:18624]	protein_coding	8.57464	5.99293	4.218	3.14114	3.81467	6.69156	5.83865	5.75428	6.54668	2.62538	4
ENSG00000134690	CDCA8	cell division cycle associated 8 [Source:HGNC Symbol;Acc:14629]	protein_coding	15.423	3.31942	1.15858	0.488519	0.511507	8.71493	11.0324	13.3264	2.71387	2.38235	4
ENSG00000134802	SLC43A3	solute carrier family 43, member 3 [Source:HGNC Symbol;Acc:17466]	protein_coding	1.95071	1.08588	0.934909	0.936057	0.712222	2.75635	2.2375	1.55648	1.00704	0.710505	4
ENSG00000135451	TROAP	trophinin associated protein (tastin) [Source:HGNC Symbol;Acc:12327]	protein_coding	5.9568	1.19085	0.387513	0.101007	0.171522	3.49505	4.55356	5.06508	1.22851	0.646946	4
ENSG00000135476	ESPL1	extra spindle pole bodies homolog 1 (S. cerevisiae) [Source:HGNC Symbol;Acc:16856]	protein_coding	2.65916	0.84123	0.30102	0.247094	0.276769	1.78602	1.9852	2.29808	0.579188	0.89881	4
ENSG00000135486	HNRNPA1	heterogeneous nuclear ribonucleoprotein A1 [Source:HGNC Symbol;Acc:5031]	protein_coding	45.868	32.274	29.7637	21.7639	18.1021	39.842	33.5347	35.4257	29.586	19.4644	4
ENSG00000135540	NHSL1	NHS-like 1 [Source:HGNC Symbol;Acc:21021]	protein_coding	2.17813	1.68017	0.406195	0.413729	0.304079	1.52915	1.25872	1.10793	0.903273	0.740837	4
ENSG00000135905	DOCK10	dedicator of cytokinesis 10 [Source:HGNC Symbol;Acc:23479]	protein_coding	9.72247	5.70016	2.98119	3.27397	4.18707	4.10824	4.72118	4.70966	2.1361	3.78425	4
ENSG00000136108	CKAP2	cytoskeleton associated protein 2 [Source:HGNC Symbol;Acc:1990]	protein_coding	14.1644	6.48131	4.0258	4.29552	3.92243	9.68525	11.0263	12.1729	4.64744	6.38315	4
ENSG00000136122	BORA	bora, aurora kinase A activator [Source:HGNC Symbol;Acc:24724]	protein_coding	3.24663	1.68572	0.863914	1.01213	0.973385	2.24869	2.16005	2.39507	1.07674	0.969676	4
ENSG00000136492	BRIP1	BRCA1 interacting protein C-terminal helicase 1 [Source:HGNC Symbol;Acc:20473]	protein_coding	4.31636	2.12562	0.939608	1.02566	0.536542	2.47349	3.67754	3.88301	0.938026	1.37151	4
ENSG00000136824	SMC2	structural maintenance of chromosomes 2 [Source:HGNC Symbol;Acc:14011]	protein_coding	11.0741	4.84763	2.72479	3.74195	4.75323	5.91877	7.02077	7.23259	2.76616	5.68387	4
ENSG00000136982	DSCC1	defective in sister chromatid cohesion 1 homolog (S. cerevisiae) [Source:HGNC Symbol;Acc:24453]	protein_coding	2.36888	0.902449	0.801114	0.693215	0.620124	1.60417	2.032	2.35544	0.515515	0.432871	4
ENSG00000137310	TCF19	transcription factor 19 [Source:HGNC Symbol;Acc:11629]	protein_coding	5.54062	1.3747	0.62903	0.854816	0.909781	2.59389	3.64338	4.09427	0.860979	1.56531	4
ENSG00000137404	NRM	nurim (nuclear envelope membrane protein) [Source:HGNC Symbol;Acc:8003]	protein_coding	8.18206	3.38118	4.06146	3.1045	2.92141	8.77274	9.02633	9.19844	5.64299	4.14685	4
ENSG00000137501	SYTL2	synaptotagmin-like 2 [Source:HGNC Symbol;Acc:15585]	protein_coding	10.3575	13.1574	3.57676	3.46351	4.62076	12.3725	11.799	7.02908	3.59465	3.59077	4
ENSG00000137804	NUSAP1	nucleolar and spindle associated protein 1 [Source:HGNC Symbol;Acc:18538]	protein_coding	22.5994	5.48448	1.78165	1.036	1.26483	12.3963	14.7924	16.2561	3.57459	3.28302	4
ENSG00000137807	KIF23	kinesin family member 23 [Source:HGNC Symbol;Acc:6392]	protein_coding	14.3831	4.01912	2.78486	2.67527	1.91117	8.74971	10.2141	10.8402	3.23536	3.29464	4
ENSG00000137812	CASC5	cancer susceptibility candidate 5 [Source:HGNC Symbol;Acc:24054]	protein_coding	3.95149	0.981561	0.284366	0.191506	0.167413	2.27336	2.8505	3.37802	0.712627	0.685884	4
ENSG00000137965	IFI44	interferon-induced protein 44 [Source:HGNC Symbol;Acc:16938]	protein_coding	1.33825	1.14423	0.721999	0.628872	0.529897	0.970929	0.990601	1.51509	0.968237	0.240247	4
ENSG00000138092	CENPO	centromere protein O [Source:HGNC Symbol;Acc:28152]	protein_coding	3.95282	1.66337	0.977038	1.00818	0.968526	2.72019	3.26663	3.41588	1.42431	1.5842	4
ENSG00000138160	KIF11	kinesin family member 11 [Source:HGNC Symbol;Acc:6388]	protein_coding	13.7709	3.52684	1.2827	1.08699	0.983507	7.69882	9.12624	10.2414	2.16117	2.16635	4
ENSG00000138180	CEP55	centrosomal protein 55kDa [Source:HGNC Symbol;Acc:1161]	protein_coding	20.2587	4.3265	1.24581	0.557872	0.799378	11.5514	13.6068	14.9384	3.07363	2.98491	4
ENSG00000138182	KIF20B	kinesin family member 20B [Source:HGNC Symbol;Acc:7212]	protein_coding	6.72424	2.2384	0.705788	0.875989	0.741891	4.51989	5.30555	5.51385	1.51546	1.68555	4
ENSG00000138346	DNA2	DNA replication helicase 2 homolog (yeast) [Source:HGNC Symbol;Acc:2939]	protein_coding	1.89914	0.841384	0.615992	0.775637	1.01217	1.17145	1.29472	1.42844	0.49921	0.646947	4
ENSG00000138347	MYPN	myopalladin [Source:HGNC Symbol;Acc:23246]	protein_coding	15.8946	7.47488	1.67444	1.77833	4.10071	2.82437	4.70696	3.40484	1.39272	4.39538	4
ENSG00000138376	BARD1	BRCA1 associated RING domain 1 [Source:HGNC Symbol;Acc:952]	protein_coding	2.05736	0.881672	0.831406	0.876599	0.511694	1.20182	1.65247	1.9577	0.657086	0.698214	4
ENSG00000138587	MNS1	meiosis-specific nuclear structural 1 [Source:HGNC Symbol;Acc:29636]	protein_coding	2.00515	0.891194	1.08525	0.989704	1.22601	1.35958	1.3339	1.64345	0.830605	0.441369	4
ENSG00000138658	C4orf21	chromosome 4 open reading frame 21 [Source:HGNC Symbol;Acc:25654]	protein_coding	1.32865	0.643909	0.459155	0.589334	0.570697	0.820594	0.969689	1.03943	0.416132	0.541213	4
ENSG00000138675	FGF5	fibroblast growth factor 5 [Source:HGNC Symbol;Acc:3683]	protein_coding	46.3476	22.859	21.7919	21.1595	18.8219	39.8713	47.5627	43.8037	16.3506	44.667	4
ENSG00000138778	CENPE	centromere protein E, 312kDa [Source:HGNC Symbol;Acc:1856]	protein_coding	6.24786	1.95487	0.617151	0.68912	0.513905	4.36909	4.78365	5.32146	1.35102	1.38011	4
ENSG00000139354	GAS2L3	growth arrest-specific 2 like 3 [Source:HGNC Symbol;Acc:27475]	protein_coding	3.07176	1.17163	0.623796	0.518903	0.316859	2.95511	2.7641	2.92479	1.40824	0.824576	4
ENSG00000139618	BRCA2	breast cancer 2, early onset [Source:HGNC Symbol;Acc:1101]	protein_coding	0.862735	0.319013	0.104449	0.133417	0.156606	0.673655	0.751248	0.857491	0.266325	0.253126	4
ENSG00000139629	GALNT6	UDP-N-acetyl-alpha-D-galactosamine:polypeptide N-acetylgalactosaminyltransferase 6 (GalNAc-T6) [Source:HGNC Symbol;Acc:4128]	protein_coding	18.8102	13.9586	4.04934	4.78068	5.68661	17.3796	17.1868	18.4443	8.98878	14.06	4
ENSG00000139734	DIAPH3	diaphanous homolog 3 (Drosophila) [Source:HGNC Symbol;Acc:15480]	protein_coding	9.92352	3.97204	1.85526	1.8959	1.93845	5.74964	6.82194	7.6213	3.44413	3.35797	4
ENSG00000139973	SYT16	synaptotagmin XVI [Source:HGNC Symbol;Acc:23142]	protein_coding	1.03444	0.822963	0.10817	0.145902	0.111447	0.317859	0.44672	0.282605	0.191949	0.844006	4
ENSG00000140525	FANCI	Fanconi anemia, complementation group I [Source:HGNC Symbol;Acc:25568]	protein_coding	8.21549	2.54479	1.20616	1.36478	1.77189	4.2668	5.27299	5.43114	1.49603	2.52038	4
ENSG00000140534	TICRR	TOPBP1-interacting checkpoint and replication regulator [Source:HGNC Symbol;Acc:28704]	protein_coding	1.83602	0.764784	0.452812	0.51494	0.394324	0.971713	1.09639	1.24691	0.482801	0.351172	4
ENSG00000140848	CPNE2	copine II [Source:HGNC Symbol;Acc:2315]	protein_coding	3.5958	2.74178	3.06924	2.69156	1.37862	3.4312	3.07625	3.51405	2.31289	1.70211	4
ENSG00000140905	GCSH	glycine cleavage system protein H (aminomethyl carrier) [Source:HGNC Symbol;Acc:4208]	protein_coding	7.95123	5.71104	5.27579	3.56446	3.71968	5.67468	5.42142	5.62189	6.89193	3.28604	4
ENSG00000141994	DUS3L	dihydrouridine synthase 3-like (S. cerevisiae) [Source:HGNC Symbol;Acc:26920]	protein_coding	9.24238	5.16505	4.88985	4.28733	2.67148	8.03503	7.63699	7.59929	6.01723	3.98014	4
ENSG00000142197	DOPEY2	dopey family member 2 [Source:HGNC Symbol;Acc:1291]	protein_coding	4.06794	3.04208	1.6264	1.62321	1.18782	3.24538	3.88344	3.52537	1.65523	3.06836	4
ENSG00000142408	CACNG8	calcium channel, voltage-dependent, gamma subunit 8 [Source:HGNC Symbol;Acc:13628]	protein_coding	0.217293	0.229681	0.0921064	0.110623	0.0814673	0.180622	0.174119	0.115697	0.0738534	0.0703129	4
ENSG00000142731	PLK4	polo-like kinase 4 [Source:HGNC Symbol;Acc:11397]	protein_coding	4.40846	0.829861	0.351313	0.275009	0.286332	3.47873	4.10866	4.54901	0.851971	0.838077	4
ENSG00000142945	KIF2C	kinesin family member 2C [Source:HGNC Symbol;Acc:6393]	protein_coding	11.6532	2.75217	0.78584	0.291883	0.347662	7.86797	8.60781	10.0531	2.46991	1.43658	4
ENSG00000143228	NUF2	NUF2, NDC80 kinetochore complex component, homolog (S. cerevisiae) [Source:HGNC Symbol;Acc:14621]	protein_coding	8.0971	1.53564	0.426175	0.219693	0.207884	4.54095	5.05162	5.46741	1.10767	1.09697	4
ENSG00000143476	DTL	denticleless E3 ubiquitin protein ligase homolog (Drosophila) [Source:HGNC Symbol;Acc:30288]	protein_coding	5.5958	1.19319	0.368255	0.21714	0.572371	2.96356	3.88633	4.53842	0.671045	1.38835	4
ENSG00000143493	INTS7	integrator complex subunit 7 [Source:HGNC Symbol;Acc:24484]	protein_coding	4.71424	3.71305	2.52133	2.59499	1.92935	3.81381	3.74359	4.15759	3.19917	1.84982	4
ENSG00000143799	PARP1	poly (ADP-ribose) polymerase 1 [Source:HGNC Symbol;Acc:270]	protein_coding	27.3066	17.6772	10.1628	9.51242	10.3858	19.7022	23.1372	20.6446	10.0991	12.7951	4
ENSG00000144354	CDCA7	cell division cycle associated 7 [Source:HGNC Symbol;Acc:14628]	protein_coding	5.78849	1.22014	0.29927	0.18024	0.107222	3.43355	4.16982	4.21103	0.937788	0.492209	4
ENSG00000144355	DLX1	distal-less homeobox 1 [Source:HGNC Symbol;Acc:2914]	protein_coding	0.190002	0.0732522	0.0160538	0.0169438	0.0577353	0.16842	0.210667	0.15461	0.0628938	0.0195607	4
ENSG00000144554	FANCD2	Fanconi anemia, complementation group D2 [Source:HGNC Symbol;Acc:3585]	protein_coding	2.79783	0.786129	0.347408	0.335337	0.428383	1.50101	1.80193	2.03305	0.484313	0.583905	4
ENSG00000144821	MYH15	myosin, heavy chain 15 [Source:HGNC Symbol;Acc:31073]	protein_coding	0.0755562	0.0300507	0.00393595	0.00888642	0.0132846	0.137634	0.11746	0.0953262	0.0277005	0.117765	4
ENSG00000145386	CCNA2	cyclin A2 [Source:HGNC Symbol;Acc:1578]	protein_coding	19.4568	4.0321	1.63158	1.23965	1.05793	10.4896	12.8865	14.9469	3.35282	2.87792	4
ENSG00000145708	CRHBP	corticotropin releasing hormone binding protein [Source:HGNC Symbol;Acc:2356]	protein_coding	0.13114	0.242612	0.00949522	0.00314382	0.0627695	0.287891	0.268159	0.208983	0.0259734	0.0183044	4
ENSG00000145908	ZNF300	zinc finger protein 300 [Source:HGNC Symbol;Acc:13091]	protein_coding	5.07607	3.2327	1.8531	1.99617	0.630685	3.54854	2.72518	3.03504	2.65761	0.241185	4
ENSG00000145911	N4BP3	NEDD4 binding protein 3 [Source:HGNC Symbol;Acc:29852]	protein_coding	0.276885	0.109689	0.0159906	0.00928499	0.0186012	0.128574	0.0923841	0.0416524	0.0376095	0.00171804	4
ENSG00000146263	MMS22L	MMS22-like, DNA repair protein [Source:HGNC Symbol;Acc:21475]	protein_coding	1.16517	0.484444	0.383753	0.504767	0.475302	0.737398	0.788515	0.821807	0.358596	0.523503	4
ENSG00000146410	FAM54A	family with sequence similarity 54, member A [Source:HGNC Symbol;Acc:21115]	protein_coding	2.27177	0.820896	0.412637	0.454463	0.504146	1.0565	1.3375	1.52422	0.437495	0.781918	4
ENSG00000146670	CDCA5	cell division cycle associated 5 [Source:HGNC Symbol;Acc:14626]	protein_coding	9.3241	2.00178	0.879579	0.562614	0.652399	4.99101	5.77048	6.64073	1.54119	1.76412	4
ENSG00000146918	NCAPG2	non-SMC condensin II complex, subunit G2 [Source:HGNC Symbol;Acc:21904]	protein_coding	10.6336	3.06738	1.61456	1.64896	1.85481	6.41516	7.21115	8.3726	4.38765	2.33533	4
ENSG00000147536	GINS4	GINS complex subunit 4 (Sld5 homolog) [Source:HGNC Symbol;Acc:28226]	protein_coding	5.8648	2.73542	0.569178	0.62662	0.829602	3.07395	3.87498	3.55422	0.834484	1.31783	4
ENSG00000147573	TRIM55	tripartite motif containing 55 [Source:HGNC Symbol;Acc:14215]	protein_coding	7.36167	2.26906	0.283959	0.176142	0.0818927	8.31824	9.30118	10.4597	1.99818	2.7728	4
ENSG00000148459	PDSS1	prenyl (decaprenyl) diphosphate synthase, subunit 1 [Source:HGNC Symbol;Acc:17759]	protein_coding	2.69002	1.43797	1.61213	1.13113	0.943703	1.71986	2.19675	2.41697	1.17122	1.44742	4
ENSG00000148634	HERC4	HECT and RLD domain containing E3 ubiquitin protein ligase 4 [Source:HGNC Symbol;Acc:24521]	protein_coding	41.7091	23.0345	9.83247	10.3731	10.3846	12.9534	17.2892	14.5897	8.10325	16.8472	4
ENSG00000148773	MKI67	antigen identified by monoclonal antibody Ki-67 [Source:HGNC Symbol;Acc:7107]	protein_coding	20.7077	4.0913	0.803477	0.318402	0.303738	9.28136	12.1687	14.8289	1.81385	2.45644	4
ENSG00000149218	ENDOD1	endonuclease domain containing 1 [Source:HGNC Symbol;Acc:29129]	protein_coding	8.22034	8.78075	2.91425	3.24473	3.00224	8.63355	9.01401	7.0164	3.32382	11.3377	4
ENSG00000149503	INCENP	inner centromere protein antigens 135/155kDa [Source:HGNC Symbol;Acc:6058]	protein_coding	9.52514	3.82622	1.85318	2.25604	2.28844	5.52876	6.52444	7.24126	2.46002	3.78563	4
ENSG00000149548	CCDC15	coiled-coil domain containing 15 [Source:HGNC Symbol;Acc:25798]	protein_coding	0.904028	0.309881	0.144042	0.159293	0.170997	0.528068	0.620907	0.737832	0.288806	0.279283	4
ENSG00000149554	CHEK1	checkpoint kinase 1 [Source:HGNC Symbol;Acc:1925]	protein_coding	5.05746	2.70892	1.95741	1.91951	1.0244	3.7631	3.73922	4.10385	1.9755	1.70296	4
ENSG00000151131	C12orf45	chromosome 12 open reading frame 45 [Source:HGNC Symbol;Acc:28628]	protein_coding	4.19084	2.7206	3.39595	2.42362	1.43984	3.52743	3.52039	3.78188	3.10212	1.70338	4
ENSG00000151364	KCTD14	potassium channel tetramerisation domain containing 14 [Source:HGNC Symbol;Acc:23295]	protein_coding	0.673305	0.268068	0.167568	0.133251	0.117264	0.352249	0.219762	0.203461	0.153098	0.0529379	4
ENSG00000151503	NCAPD3	non-SMC condensin II complex, subunit D3 [Source:HGNC Symbol;Acc:28952]	protein_coding	4.74577	2.04364	1.10679	1.37644	1.5164	2.75082	3.42347	3.6023	1.516	2.26006	4
ENSG00000151651	ADAM8	ADAM metallopeptidase domain 8 [Source:HGNC Symbol;Acc:215]	protein_coding	0.641164	0.538015	0.199448	0.216947	0.502345	0.640994	0.499601	0.456454	0.438534	0.255482	4
ENSG00000151725	MLF1IP	MLF1 interacting protein [Source:HGNC Symbol;Acc:21348]	protein_coding	10.2823	2.40303	0.823663	0.560354	1.11318	4.79678	6.07895	6.41135	1.41719	1.66868	4
ENSG00000152253	SPC25	SPC25, NDC80 kinetochore complex component, homolog (S. cerevisiae) [Source:HGNC Symbol;Acc:24031]	protein_coding	4.9864	1.13443	0.504705	0.208263	0.28863	2.9562	3.35717	3.93951	0.758002	0.822922	4
ENSG00000152270	PDE3B	phosphodiesterase 3B, cGMP-inhibited [Source:HGNC Symbol;Acc:8779]	protein_coding	0.473452	0.332448	0.038783	0.0455471	0.0629152	0.213492	0.114704	0.153824	0.0428837	0.0454638	4
ENSG00000152936	IFLTD1	intermediate filament tail domain containing 1 [Source:HGNC Symbol;Acc:26683]	protein_coding	0.446933	0.124645	0.0408015	0.034316	0.0216445	0.0654521	0.0769649	0.197113	0.0365384	0.0369668	4
ENSG00000153044	CENPH	centromere protein H [Source:HGNC Symbol;Acc:17268]	protein_coding	6.59908	1.76779	1.0122	0.763379	1.36624	3.13147	3.72152	3.61343	1.19856	0.768209	4
ENSG00000153976	HS3ST3A1	heparan sulfate (glucosamine) 3-O-sulfotransferase 3A1 [Source:HGNC Symbol;Acc:5196]	protein_coding	8.25538	4.21493	4.11163	4.46878	2.11933	5.65637	5.71588	5.20964	3.4073	2.29252	4
ENSG00000154146	NRGN	neurogranin (protein kinase C substrate, RC3) [Source:HGNC Symbol;Acc:8000]	protein_coding	2.97631	0.63233	0.244199	0.0469969	0.0494689	4.02688	4.80549	6.51843	1.56614	1.79134	4
ENSG00000154760	SLFN13	schlafen family member 13 [Source:HGNC Symbol;Acc:26481]	protein_coding	1.43426	0.921431	0.320918	0.343039	0.215528	0.757785	0.55061	0.519939	0.704646	0.141197	4
ENSG00000154839	SKA1	spindle and kinetochore associated complex subunit 1 [Source:HGNC Symbol;Acc:28109]	protein_coding	3.93176	0.880801	0.364299	0.257349	0.221434	2.7918	2.74398	3.33968	0.806184	0.692035	4
ENSG00000154920	EME1	essential meiotic endonuclease 1 homolog 1 (S. pombe) [Source:HGNC Symbol;Acc:24965]	protein_coding	2.17448	0.554059	0.225386	0.200875	0.291487	1.21668	1.76414	1.80829	0.515287	0.435939	4
ENSG00000155189	AGPAT5	1-acylglycerol-3-phosphate O-acyltransferase 5 (lysophosphatidic acid acyltransferase, epsilon) [Source:HGNC Symbol;Acc:20886]	protein_coding	5.1222	2.88171	1.93274	1.74044	2.39215	4.28239	4.00483	3.93148	3.12117	1.64212	4
ENSG00000156398	SFXN2	sideroflexin 2 [Source:HGNC Symbol;Acc:16086]	protein_coding	2.49125	1.3245	0.618698	0.517565	0.46576	1.16563	1.25034	1.31755	0.7984	0.474952	4
ENSG00000156509	FBXO43	F-box protein 43 [Source:HGNC Symbol;Acc:28521]	protein_coding	0.531143	0.155712	0.11797	0.0980165	0.081981	0.212583	0.197524	0.296085	0.0983705	0.14479	4
ENSG00000156802	ATAD2	ATPase family, AAA domain containing 2 [Source:HGNC Symbol;Acc:30123]	protein_coding	10.8647	3.85289	1.9301	2.23013	2.76904	4.99782	6.67256	7.00998	1.72264	2.99127	4
ENSG00000156970	BUB1B	budding uninhibited by benzimidazoles 1 homolog beta (yeast) [Source:HGNC Symbol;Acc:1149]	protein_coding	7.96926	1.90916	0.447964	0.213406	0.284264	5.15877	6.93024	7.27977	1.55529	1.56847	4
ENSG00000157456	CCNB2	cyclin B2 [Source:HGNC Symbol;Acc:1580]	protein_coding	22.1869	5.56006	2.03852	1.13629	1.01378	13.6672	14.8861	16.1567	4.7363	3.06727	4
ENSG00000158164	TMSB15A	thymosin beta 15a [Source:HGNC Symbol;Acc:30744]	protein_coding	4.09621	0.725384	0.583754	0.256747	0.582421	7.835	8.60779	9.63968	2.09892	0.737123	4
ENSG00000158246	FAM46B	family with sequence similarity 46, member B [Source:HGNC Symbol;Acc:28273]	protein_coding	1.89578	1.20763	1.27681	1.20586	0.845525	2.04744	3.51614	3.93454	1.25004	0.877459	4
ENSG00000158402	CDC25C	cell division cycle 25 homolog C (S. pombe) [Source:HGNC Symbol;Acc:1727]	protein_coding	1.98283	0.557324	0.109488	0.0531116	0.0744711	1.58364	1.77218	1.89559	0.637897	0.295174	4
ENSG00000159055	MIS18A	MIS18 kinetochore protein homolog A (S. pombe) [Source:HGNC Symbol;Acc:1286]	protein_coding	6.82594	3.06129	2.52852	2.08191	2.13623	4.30359	4.72649	5.21719	2.47845	2.05173	4
ENSG00000159259	CHAF1B	chromatin assembly factor 1, subunit B (p60) [Source:HGNC Symbol;Acc:1911]	protein_coding	5.50466	1.94081	1.14698	1.11058	1.0479	3.30201	3.98097	4.49015	1.51279	1.50557	4
ENSG00000160298	C21orf58	chromosome 21 open reading frame 58 [Source:HGNC Symbol;Acc:1300]	protein_coding	2.02497	0.873112	0.468326	0.62461	0.752698	1.48166	1.74021	1.86669	0.657779	0.8324	4
ENSG00000160447	PKN3	protein kinase N3 [Source:HGNC Symbol;Acc:17999]	protein_coding	3.16938	1.51218	2.15587	1.86154	1.08014	2.8288	3.02839	3.14865	1.51031	1.10805	4
ENSG00000160957	RECQL4	RecQ protein-like 4 [Source:HGNC Symbol;Acc:9949]	processed_transcript	7.0603	2.36398	1.40155	1.22781	1.86144	3.46476	4.43448	5.01057	1.95245	2.86855	4
ENSG00000161692	DBF4B	DBF4 homolog B (S. cerevisiae) [Source:HGNC Symbol;Acc:17883]	protein_coding	2.11715	0.970757	0.484228	0.598192	0.836327	1.49214	1.77403	1.93497	0.922906	1.3522	4
ENSG00000161800	RACGAP1	Rac GTPase activating protein 1 [Source:HGNC Symbol;Acc:9804]	protein_coding	18.7759	5.96968	2.87557	2.51887	2.14981	10.0037	12.3358	13.2416	3.57429	4.00897	4
ENSG00000161888	SPC24	SPC24, NDC80 kinetochore complex component, homolog (S. cerevisiae) [Source:HGNC Symbol;Acc:26913]	protein_coding	8.95693	1.78301	0.851434	0.481068	0.455782	3.57667	4.8397	5.01517	1.21418	1.19668	4
ENSG00000162062	C16orf59	chromosome 16 open reading frame 59 [Source:HGNC Symbol;Acc:25849]	protein_coding	2.21524	0.771231	0.494058	0.403988	0.603974	1.46773	1.88173	2.07067	0.90091	1.05769	4
ENSG00000162063	CCNF	cyclin F [Source:HGNC Symbol;Acc:1591]	protein_coding	3.27821	1.16466	0.526924	0.421331	0.27505	1.6513	2.20877	2.87273	0.912544	0.886439	4
ENSG00000162073	PAQR4	progestin and adipoQ receptor family member IV [Source:HGNC Symbol;Acc:26386]	protein_coding	2.61182	0.832846	0.496546	0.701999	0.859837	2.05271	2.79957	2.75707	1.25407	2.54802	4
ENSG00000162607	USP1	ubiquitin specific peptidase 1 [Source:HGNC Symbol;Acc:12607]	protein_coding	12.81	6.32523	5.73826	5.79649	5.14134	8.44412	8.54119	10.0441	5.86261	4.09101	4
ENSG00000162745	OLFML2B	olfactomedin-like 2B [Source:HGNC Symbol;Acc:24558]	protein_coding	1.99596	0.980959	1.05961	0.940522	0.469484	1.08217	1.1677	1.15478	0.475539	0.120863	4
ENSG00000163006	CCDC138	coiled-coil domain containing 138 [Source:HGNC Symbol;Acc:26531]	protein_coding	1.02828	0.524967	0.296651	0.288801	0.257292	0.756784	0.744417	0.921399	0.321021	0.238345	4
ENSG00000163082	SGPP2	sphingosine-1-phosphate phosphatase 2 [Source:HGNC Symbol;Acc:19953]	protein_coding	0.929867	0.343186	0.23661	0.265627	0.10991	0.512929	0.334059	0.362339	0.144021	0.168776	4
ENSG00000163507	KIAA1524	KIAA1524 [Source:HGNC Symbol;Acc:29302]	protein_coding	6.7416	2.22847	1.04562	0.972122	0.981916	4.17264	5.10018	5.74986	1.68329	1.94336	4
ENSG00000163535	SGOL2	shugoshin-like 2 (S. pombe) [Source:HGNC Symbol;Acc:30812]	protein_coding	4.95569	1.63062	0.805351	0.908686	1.03339	3.29091	3.55025	3.88158	1.27942	1.50014	4
ENSG00000163545	NUAK2	NUAK family, SNF1-like kinase, 2 [Source:HGNC Symbol;Acc:29558]	protein_coding	8.21414	4.35119	3.1231	3.95041	3.20107	13.7066	8.40064	8.37264	4.84557	4.0711	4
ENSG00000163584	RPL22L1	ribosomal protein L22-like 1 [Source:HGNC Symbol;Acc:27610]	protein_coding	44.4223	28.8635	16.1517	6.99693	2.94312	35.5517	30.2955	33.8463	28.1539	12.361	4
ENSG00000163808	KIF15	kinesin family member 15 [Source:HGNC Symbol;Acc:17273]	protein_coding	3.44601	0.854657	0.328883	0.235622	0.205122	2.11199	2.54776	2.95216	0.561078	0.57138	4
ENSG00000163918	RFC4	replication factor C (activator 1) 4, 37kDa [Source:HGNC Symbol;Acc:9972]	protein_coding	7.5161	2.90149	2.66111	2.20957	2.29983	5.23075	5.69073	5.66116	2.65938	2.15428	4
ENSG00000164032	H2AFZ	H2A histone family, member Z [Source:HGNC Symbol;Acc:4741]	protein_coding	98.0363	37.6981	44.9374	26.2463	35.0795	72.3805	75.2559	79.5282	51.1996	23.4192	4
ENSG00000164045	CDC25A	cell division cycle 25 homolog A (S. pombe) [Source:HGNC Symbol;Acc:1725]	protein_coding	3.29164	1.0457	0.40462	0.398002	0.556205	1.65531	2.10805	2.33666	0.673473	0.935979	4
ENSG00000164087	POC1A	POC1 centriolar protein homolog A (Chlamydomonas) [Source:HGNC Symbol;Acc:24488]	protein_coding	7.63281	2.73571	1.42978	1.57761	1.46674	4.70321	5.21512	5.52101	2.56151	2.05614	4
ENSG00000164104	HMGB2	high mobility group box 2 [Source:HGNC Symbol;Acc:5000]	protein_coding	35.8143	12.226	13.1714	10.4406	10.3675	34.6864	30.981	34.2639	14.5211	8.3736	4
ENSG00000164109	MAD2L1	MAD2 mitotic arrest deficient-like 1 (yeast) [Source:HGNC Symbol;Acc:6763]	protein_coding	15.2536	4.20375	2.21129	1.28055	1.5029	9.01649	10.2992	11.3126	3.05693	2.56417	4
ENSG00000164318	EGFLAM	EGF-like, fibronectin type III and laminin G domains [Source:HGNC Symbol;Acc:26810]	protein_coding	0.241131	0.0911334	0.00463471	0.00710541	0.0256658	0.23223	0.174336	0.0695123	0.0219479	0.0302093	4
ENSG00000164611	PTTG1	pituitary tumor-transforming 1 [Source:HGNC Symbol;Acc:9690]	protein_coding	24.5218	5.82742	3.77282	1.40345	1.24092	15.3405	17.3936	17.55	5.95285	3.83617	4
ENSG00000164687	FABP5	fatty acid binding protein 5 (psoriasis-associated) [Source:HGNC Symbol;Acc:3560]	protein_coding	2.1949	0.810121	0.408084	0.212808	0.160472	1.25556	1.14646	0.97034	0.39856	0.139697	4
ENSG00000165244	ZNF367	zinc finger protein 367 [Source:HGNC Symbol;Acc:18320]	protein_coding	4.86101	1.11122	0.47256	0.359717	1.54336	1.32698	1.89515	1.93296	0.224923	0.948177	4
ENSG00000165304	MELK	maternal embryonic leucine zipper kinase [Source:HGNC Symbol;Acc:16870]	protein_coding	12.372	3.74427	2.17046	2.10279	1.77772	9.54363	10.0741	10.583	4.45864	3.36488	4
ENSG00000165480	SKA3	spindle and kinetochore associated complex subunit 3 [Source:HGNC Symbol;Acc:20262]	protein_coding	6.70643	1.20133	0.436238	0.185213	0.182173	3.6907	4.00118	5.02147	0.962992	0.8951	4
ENSG00000165490	C11orf82	chromosome 11 open reading frame 82 [Source:HGNC Symbol;Acc:26351]	protein_coding	2.23796	0.448075	0.201284	0.123751	0.146888	1.13422	1.38802	1.52592	0.31232	0.288904	4
ENSG00000166451	CENPN	centromere protein N [Source:HGNC Symbol;Acc:30873]	protein_coding	7.47752	3.44949	1.71848	1.82082	1.42305	3.75448	4.46322	4.78117	2.1116	1.96443	4
ENSG00000166508	MCM7	minichromosome maintenance complex component 7 [Source:HGNC Symbol;Acc:6950]	protein_coding	39.0995	10.1405	5.72863	4.81529	7.08786	20.5999	25.481	26.3023	7.76943	8.53566	4
ENSG00000166670	MMP10	matrix metallopeptidase 10 (stromelysin 2) [Source:HGNC Symbol;Acc:7156]	protein_coding	1.13927	0.124375	0.129394	0.0689964	1.22404	0.343731	0.829427	0.121387	0.700916	0.0888578	4
ENSG00000166803	KIAA0101	KIAA0101 [Source:HGNC Symbol;Acc:28961]	protein_coding	12.793	3.00843	0.927671	0.460755	0.688667	6.09377	6.62173	6.24685	2.24799	1.61258	4
ENSG00000166851	PLK1	polo-like kinase 1 [Source:HGNC Symbol;Acc:9077]	protein_coding	13.3814	2.76875	0.84528	0.423259	0.451656	6.27101	8.31455	9.8535	2.19951	1.71067	4
ENSG00000167325	RRM1	ribonucleotide reductase M1 [Source:HGNC Symbol;Acc:10451]	protein_coding	34.3473	14.741	12.1645	11.5948	9.57716	20.9537	25.5032	25.6989	12.3036	14.9416	4
ENSG00000167513	CDT1	chromatin licensing and DNA replication factor 1 [Source:HGNC Symbol;Acc:24576]	protein_coding	5.50007	1.06657	0.494184	0.414403	0.518165	3.35093	4.07699	4.3299	1.07128	1.23976	4
ENSG00000167670	CHAF1A	chromatin assembly factor 1, subunit A (p150) [Source:HGNC Symbol;Acc:1910]	protein_coding	11.4027	4.21004	1.90787	2.06359	2.48954	6.30036	8.17412	8.71161	2.88851	4.39402	4
ENSG00000167747	C19orf48	chromosome 19 open reading frame 48 [Source:HGNC Symbol;Acc:29667]	protein_coding	27.8188	14.1399	9.67379	7.34322	4.55702	19.1159	17.3561	17.3862	16.7638	8.73744	4
ENSG00000167900	TK1	thymidine kinase 1, soluble [Source:HGNC Symbol;Acc:11830]	protein_coding	85.6138	16.9177	6.48592	2.01995	2.53416	31.8416	42.5283	49.1115	9.67398	6.17315	4
ENSG00000168078	PBK	PDZ binding kinase [Source:HGNC Symbol;Acc:18282]	protein_coding	15.7448	3.48709	1.26218	0.538084	0.655212	9.35642	11.0572	12.0445	2.95469	2.48921	4
ENSG00000168389	MFSD2A	major facilitator superfamily domain containing 2A [Source:HGNC Symbol;Acc:25897]	protein_coding	2.02771	0.847373	0.508393	0.429624	0.540246	1.70193	1.54815	1.50102	1.37463	0.605531	4
ENSG00000168496	FEN1	flap structure-specific endonuclease 1 [Source:HGNC Symbol;Acc:3650]	protein_coding	12.052	4.25142	2.33911	1.86303	2.7231	6.40425	8.02878	8.61563	3.3916	3.89206	4
ENSG00000169607	CKAP2L	cytoskeleton associated protein 2-like [Source:HGNC Symbol;Acc:26877]	protein_coding	6.29418	1.37698	0.299488	0.201886	0.163889	3.05563	3.59187	4.11503	0.760461	0.802777	4
ENSG00000169679	BUB1	budding uninhibited by benzimidazoles 1 homolog (yeast) [Source:HGNC Symbol;Acc:1148]	protein_coding	9.268	1.96723	0.514672	0.26523	0.392182	4.84763	5.53644	6.0502	1.25238	1.37848	4
ENSG00000170006	TMEM154	transmembrane protein 154 [Source:HGNC Symbol;Acc:26489]	protein_coding	1.3495	1.10151	0.339796	0.426636	0.32772	0.754355	0.751123	0.964988	0.743438	0.288863	4
ENSG00000170312	CDK1	cyclin-dependent kinase 1 [Source:HGNC Symbol;Acc:1722]	protein_coding	10.0615	2.18817	0.953747	0.376563	0.58374	7.17354	8.61301	9.12583	2.48404	2.23252	4
ENSG00000170439	METTL7B	methyltransferase like 7B [Source:HGNC Symbol;Acc:28276]	protein_coding	1.89801	0.691191	0.0877323	0.0490478	0.0655245	0.366479	0.502902	0.193023	0.0624668	0.517237	4
ENSG00000170779	CDCA4	cell division cycle associated 4 [Source:HGNC Symbol;Acc:14625]	protein_coding	9.46276	3.29974	2.11974	1.92453	1.89146	5.24031	5.64184	6.89781	3.21165	3.57623	4
ENSG00000170961	HAS2	hyaluronan synthase 2 [Source:HGNC Symbol;Acc:4819]	protein_coding	5.65621	1.94788	4.75697	2.48206	0.956964	3.87368	6.03255	5.33589	0.502246	0.361649	4
ENSG00000171241	SHCBP1	SHC SH2-domain binding protein 1 [Source:HGNC Symbol;Acc:29547]	protein_coding	13.5297	3.11402	0.862541	0.417527	0.496214	7.86154	9.47669	10.4997	2.63894	2.10406	4
ENSG00000171320	ESCO2	establishment of cohesion 1 homolog 2 (S. cerevisiae) [Source:HGNC Symbol;Acc:27230]	protein_coding	1.50361	0.403142	0.12254	0.117304	0.154526	0.722536	0.827538	1.01042	0.235746	0.270234	4
ENSG00000171848	RRM2	ribonucleotide reductase M2 [Source:HGNC Symbol;Acc:10452]	protein_coding	37.1952	7.25828	2.16011	0.809482	1.1943	17.6481	22.1095	24.1534	3.55078	4.13942	4
ENSG00000172296	SPTLC3	serine palmitoyltransferase, long chain base subunit 3 [Source:HGNC Symbol;Acc:16253]	protein_coding	0.568992	0.439611	0.0509542	0.0527548	0.091204	0.485588	0.412251	0.433282	0.253483	0.530527	4
ENSG00000172716	SLFN11	schlafen family member 11 [Source:HGNC Symbol;Acc:26633]	protein_coding	14.279	11.533	6.71487	6.12164	4.8326	14.6654	9.95792	11.1237	14.2696	2.61528	4
ENSG00000173207	CKS1B	CDC28 protein kinase regulatory subunit 1B [Source:HGNC Symbol;Acc:19083]	protein_coding	11.0909	3.97437	4.04341	2.32189	2.72789	7.81766	8.52119	8.94182	4.69929	3.57022	4
ENSG00000174371	EXO1	exonuclease 1 [Source:HGNC Symbol;Acc:3511]	protein_coding	4.03895	0.854121	0.305883	0.281767	0.325337	1.85666	2.45162	2.58437	0.448915	0.610801	4
ENSG00000174442	ZWILCH	Zwilch, kinetochore associated, homolog (Drosophila) [Source:HGNC Symbol;Acc:25468]	protein_coding	7.10443	2.79949	1.6678	1.74264	1.96037	5.03878	5.48964	6.07197	2.63435	3.29447	4
ENSG00000175063	UBE2C	ubiquitin-conjugating enzyme E2C [Source:HGNC Symbol;Acc:15937]	protein_coding	17.3395	3.51454	2.05492	0.564587	0.807939	11.2819	12.2894	14.6638	3.54243	1.90595	4
ENSG00000175305	CCNE2	cyclin E2 [Source:HGNC Symbol;Acc:1590]	protein_coding	1.70997	0.445659	0.200875	0.185885	0.348816	0.912321	1.25572	1.46334	0.296123	0.537477	4
ENSG00000175592	FOSL1	FOS-like antigen 1 [Source:HGNC Symbol;Acc:13718]	protein_coding	97.304	47.5063	36.0614	46.5076	39.2089	95.0591	91.3111	99.0095	47.2556	84.6169	4
ENSG00000175832	ETV4	ets variant 4 [Source:HGNC Symbol;Acc:3493]	protein_coding	6.33084	3.12413	1.71097	1.40651	2.99963	7.18708	6.26348	6.05723	4.25825	3.49193	4
ENSG00000176208	ATAD5	ATPase family, AAA domain containing 5 [Source:HGNC Symbol;Acc:25752]	protein_coding	1.56126	0.505171	0.268937	0.198584	0.282832	0.889009	1.28882	1.28857	0.393254	0.474939	4
ENSG00000176619	LMNB2	lamin B2 [Source:HGNC Symbol;Acc:6638]	protein_coding	48.4024	19.9617	11.7833	12.0602	11.1161	29.4556	33.3896	36.5897	15.3889	18.965	4
ENSG00000176641	RNF152	ring finger protein 152 [Source:HGNC Symbol;Acc:26811]	protein_coding	5.77999	2.4044	1.21794	1.20609	0.995189	2.48381	1.90458	1.96223	1.19655	2.99861	4
ENSG00000176890	TYMS	thymidylate synthetase [Source:HGNC Symbol;Acc:12441]	protein_coding	59.2581	16.9748	8.24902	5.59249	7.03451	27.8903	34.8542	36.1317	11.0864	10.4858	4
ENSG00000176974	SHMT1	serine hydroxymethyltransferase 1 (soluble) [Source:HGNC Symbol;Acc:10850]	protein_coding	4.85759	2.6985	1.91655	1.4467	1.14492	2.02315	2.36046	2.03081	1.09882	0.700946	4
ENSG00000177084	POLE	polymerase (DNA directed), epsilon, catalytic subunit [Source:HGNC Symbol;Acc:9177]	protein_coding	3.9879	1.75956	0.822604	0.981995	1.00722	2.01139	2.57477	2.71768	0.853469	1.54451	4
ENSG00000177602	GSG2	germ cell associated 2 (haspin) [Source:HGNC Symbol;Acc:19682]	protein_coding	1.37586	0.630915	0.2885	0.255203	0.285679	0.671192	1.13247	1.48368	0.460485	0.5728	4
ENSG00000178295	GEN1	Gen endonuclease homolog 1 (Drosophila) [Source:HGNC Symbol;Acc:26881]	protein_coding	4.07911	2.40318	1.6342	1.78508	1.35342	2.03	2.34431	2.52915	1.22268	1.31785	4
ENSG00000178401	DNAJC22	DnaJ (Hsp40) homolog, subfamily C, member 22 [Source:HGNC Symbol;Acc:25802]	protein_coding	1.96965	1.22659	0.207141	0.139216	0.0958005	1.81523	1.60477	2.23005	1.56385	0.333584	4
ENSG00000178921	PFAS	phosphoribosylformylglycinamidine synthase [Source:HGNC Symbol;Acc:8863]	protein_coding	10.0612	4.51764	2.6066	2.60744	2.55564	6.22803	6.8014	6.86102	3.62893	2.91053	4
ENSG00000178999	AURKB	aurora kinase B [Source:HGNC Symbol;Acc:11390]	protein_coding	18.5725	3.67499	1.16616	0.554509	0.335416	11.7197	13.8522	15.3446	3.00905	2.29572	4
ENSG00000179300	ZCCHC5	zinc finger, CCHC domain containing 5 [Source:HGNC Symbol;Acc:22997]	protein_coding	0.582188	0.186132	0.0367606	0.0245672	0.0461578	0.115019	0.17001	0.335439	0.0135231	0.243489	4
ENSG00000179362	HMGN2P46	high mobility group nucleosomal binding domain 2 pseudogene 46 [Source:HGNC Symbol;Acc:26817]	pseudogene	4.37547	1.88042	2.35036	1.67605	1.04921	2.73346	2.8983	2.98398	2.0681	1.11371	4
ENSG00000179750	APOBEC3B	apolipoprotein B mRNA editing enzyme, catalytic polypeptide-like 3B [Source:HGNC Symbol;Acc:17352]	protein_coding	9.29176	1.90674	0.724046	0.305358	0.425302	4.09764	5.47558	5.62925	1.2558	0.76566	4
ENSG00000179841	AKAP5	A kinase (PRKA) anchor protein 5 [Source:HGNC Symbol;Acc:375]	protein_coding	0.288695	0.16315	0.0686439	0.0910717	0.0691794	0.189821	0.185078	0.314829	0.0912195	0.147706	4
ENSG00000180071	ANKRD18A	ankyrin repeat domain 18A [Source:HGNC Symbol;Acc:23643]	protein_coding	0.164884	0.121015	0.0291957	0.0311451	0.02828	0.0974493	0.0698396	0.10273	0.0636497	0.026048	4
ENSG00000180198	RCC1	regulator of chromosome condensation 1 [Source:HGNC Symbol;Acc:1913]	protein_coding	15.314	8.3895	7.75583	6.98528	4.35361	12.2368	11.8416	11.8508	7.06066	4.63227	4
ENSG00000180611	MB21D2	Mab-21 domain containing 2 [Source:HGNC Symbol;Acc:30438]	protein_coding	7.14694	4.64208	5.38553	4.20149	3.27162	4.77985	5.73534	7.93106	3.65493	1.87996	4
ENSG00000181544	FANCB	Fanconi anemia, complementation group B [Source:HGNC Symbol;Acc:3583]	protein_coding	1.88619	0.657505	0.605212	0.652388	0.434005	0.958632	1.18969	1.27062	0.384731	0.342838	4
ENSG00000181938	GINS3	GINS complex subunit 3 (Psf3 homolog) [Source:HGNC Symbol;Acc:25851]	protein_coding	2.13457	0.801358	0.401681	0.365672	0.329537	0.903741	1.06417	1.25982	0.476577	0.351023	4
ENSG00000183763	TRAIP	TRAF interacting protein [Source:HGNC Symbol;Acc:30764]	protein_coding	1.71412	0.661961	0.469189	0.336557	0.272585	1.28547	1.42659	1.6154	0.584625	0.399338	4
ENSG00000183814	LIN9	lin-9 homolog (C. elegans) [Source:HGNC Symbol;Acc:30830]	protein_coding	1.44543	0.566689	0.387015	0.5251	0.433327	0.820686	0.974948	1.05462	0.467402	0.491869	4
ENSG00000183856	IQGAP3	IQ motif containing GTPase activating protein 3 [Source:HGNC Symbol;Acc:20669]	protein_coding	13.708	2.91601	0.659028	0.273028	0.353713	7.57649	7.98434	8.82124	1.77508	1.91991	4
ENSG00000183963	SMTN	smoothelin [Source:HGNC Symbol;Acc:11126]	protein_coding	13.6259	8.68252	8.32084	7.95683	6.38136	9.98734	13.0206	13.6229	6.24334	11.5824	4
ENSG00000184445	KNTC1	kinetochore associated 1 [Source:HGNC Symbol;Acc:17255]	protein_coding	3.8112	1.44756	0.623365	0.88002	1.24016	2.64887	2.81043	3.11706	0.934491	1.37287	4
ENSG00000184661	CDCA2	cell division cycle associated 2 [Source:HGNC Symbol;Acc:14623]	protein_coding	7.1699	1.80522	0.501061	0.349785	0.273196	3.35648	3.98987	4.74894	1.03278	0.971346	4
ENSG00000185133	INPP5J	inositol polyphosphate-5-phosphatase J [Source:HGNC Symbol;Acc:8956]	protein_coding	0.504907	0.313381	0.118336	0.08988	0.104084	0.551851	0.485408	0.515278	0.445269	0.218459	4
ENSG00000185480	PARPBP	PARP1 binding protein [Source:HGNC Symbol;Acc:26074]	protein_coding	1.92448	0.736632	0.531009	0.506155	0.455984	1.19932	1.35587	1.37874	0.581988	0.747427	4
ENSG00000186185	KIF18B	kinesin family member 18B [Source:HGNC Symbol;Acc:27102]	protein_coding	5.95551	1.14077	0.219498	0.118239	0.0922018	3.12409	4.38083	5.44633	0.824677	0.711854	4
ENSG00000186193	SAPCD2	suppressor APC domain containing 2 [Source:HGNC Symbol;Acc:28055]	protein_coding	2.94042	0.562976	0.163371	0.0736591	0.0657051	1.93407	2.08317	2.36522	0.521531	0.308494	4
ENSG00000186469	GNG2	guanine nucleotide binding protein (G protein), gamma 2 [Source:HGNC Symbol;Acc:4404]	protein_coding	4.50402	2.4625	0.397015	0.350375	0.437722	5.54944	4.52833	4.8307	3.53524	1.72024	4
ENSG00000186530	XKR5	XK, Kell blood group complex subunit-related family, member 5 [Source:HGNC Symbol;Acc:20782]	lincRNA	0.312592	0.0694842	0.0495124	0.0428406	0.0600678	0.207383	0.204699	0.21868	0.0648537	0.0412252	4
ENSG00000186638	KIF24	kinesin family member 24 [Source:HGNC Symbol;Acc:19916]	protein_coding	1.19295	0.37187	0.181247	0.252857	0.330157	0.486682	0.573681	0.693518	0.134391	0.246506	4
ENSG00000186871	ERCC6L	excision repair cross-complementing rodent repair deficiency, complementation group 6-like [Source:HGNC Symbol;Acc:20794]	protein_coding	2.75215	0.537103	0.167748	0.0653488	0.114114	1.53304	2.19248	2.67485	0.452748	0.500768	4
ENSG00000187514	PTMA	prothymosin, alpha [Source:HGNC Symbol;Acc:9623]	protein_coding	165.11	78.3452	77.3267	46.1363	40.837	126.262	117.262	120.813	106.353	45.9212	4
ENSG00000187741	FANCA	Fanconi anemia, complementation group A [Source:HGNC Symbol;Acc:3582]	protein_coding	2.73549	0.781803	0.211096	0.209306	0.270608	1.44815	1.7988	1.83522	0.45139	0.5214	4
ENSG00000187951	ARHGAP11B	Rho GTPase activating protein 11B [Source:HGNC Symbol;Acc:15782]	protein_coding	3.70729	1.38124	0.571433	0.642012	0.371869	1.6621	1.93398	2.26245	0.656969	0.58244	4
ENSG00000188486	H2AFX	H2A histone family, member X [Source:HGNC Symbol;Acc:4739]	protein_coding	41.2523	15.46	14.9759	10.5947	11.1172	22.5991	27.7794	36.1912	14.676	12.8475	4
ENSG00000188610	FAM72B	family with sequence similarity 72, member B [Source:HGNC Symbol;Acc:24805]	protein_coding	1.43547	0.615458	0.467707	0.395219	0.243762	0.93674	0.849037	0.888746	0.442816	0.548499	4
ENSG00000188985	DHFRP1	dihydrofolate reductase pseudogene 1 [Source:HGNC Symbol;Acc:2862]	pseudogene	11.4456	3.56561	1.78642	1.77233	2.31266	5.48334	6.39186	6.51622	2.5067	2.50227	4
ENSG00000189057	FAM111B	family with sequence similarity 111, member B [Source:HGNC Symbol;Acc:24200]	protein_coding	5.89511	1.16392	0.318532	0.300621	0.625842	2.46741	4.01148	4.3222	0.43821	1.26649	4
ENSG00000196550	FAM72A	family with sequence similarity 72, member A [Source:HGNC Symbol;Acc:24044]	protein_coding	1.35008	0.597502	0.367827	0.405227	0.295498	0.843977	0.825422	0.87109	0.344814	0.474707	4
ENSG00000196584	XRCC2	X-ray repair complementing defective repair in Chinese hamster cells 2 [Source:HGNC Symbol;Acc:12829]	protein_coding	1.63471	0.509962	0.193066	0.246258	0.35959	0.870425	1.15505	1.21371	0.390215	0.429883	4
ENSG00000197275	RAD54B	RAD54 homolog B (S. cerevisiae) [Source:HGNC Symbol;Acc:17228]	protein_coding	1.65317	0.8124	0.705209	0.822452	0.777256	1.27956	1.37257	1.37647	0.733906	0.563819	4
ENSG00000197299	BLM	Bloom syndrome, RecQ helicase-like [Source:HGNC Symbol;Acc:1058]	protein_coding	1.31798	0.290001	0.0983106	0.0596656	0.0758931	0.907157	1.06397	1.15547	0.209872	0.246232	4
ENSG00000197301	RP11-366L20.2	Uncharacterized protein [Source:UniProtKB/TrEMBL;Acc:B7WPI5]	protein_coding	1.38526	0.93263	0.265687	0.320655	0.38195	0.69515	0.649715	0.394567	0.119859	0.54338	4
ENSG00000197381	ADARB1	adenosine deaminase, RNA-specific, B1 [Source:HGNC Symbol;Acc:226]	protein_coding	11.5368	8.17054	3.33114	3.13439	4.50235	6.08976	6.17409	5.37567	2.32472	1.94046	4
ENSG00000197472	ZNF695	zinc finger protein 695 [Source:HGNC Symbol;Acc:30954]	protein_coding	0.263822	0.0748421	0.0242391	0.0341241	0.044274	0.127442	0.131441	0.145548	0.0360572	0.0296384	4
ENSG00000197744	PTMAP2	prothymosin, alpha pseudogene 2 (gene sequence 32) [Source:HGNC Symbol;Acc:9625]	pseudogene	5.14346	3.08294	2.62934	1.31299	1.01281	4.30816	4.06946	3.85558	3.97223	1.29417	4
ENSG00000198056	PRIM1	primase, DNA, polypeptide 1 (49kDa) [Source:HGNC Symbol;Acc:9369]	protein_coding	2.9727	0.735162	0.452119	0.504377	0.555764	1.82929	2.09697	2.15691	0.647544	0.787295	4
ENSG00000198185	ZNF334	zinc finger protein 334 [Source:HGNC Symbol;Acc:15806]	protein_coding	2.03706	2.10874	0.491174	0.708725	0.957419	2.19488	1.60877	1.21689	1.22223	0.97835	4
ENSG00000198554	WDHD1	WD repeat and HMG-box DNA binding protein 1 [Source:HGNC Symbol;Acc:23170]	protein_coding	3.94441	1.96671	0.996806	1.48672	1.44647	2.879	3.31385	3.24854	1.34849	1.67591	4
ENSG00000198826	ARHGAP11A	Rho GTPase activating protein 11A [Source:HGNC Symbol;Acc:15783]	protein_coding	11.2932	3.11961	1.63827	1.48939	1.06807	7.04587	8.26955	9.21574	2.84389	2.1861	4
ENSG00000198830	HMGN2	high mobility group nucleosomal binding domain 2 [Source:HGNC Symbol;Acc:4986]	protein_coding	120.839	47.9941	60.837	39.7175	25.7828	75.4578	77.3328	83.5428	53.7257	27.2739	4
ENSG00000198885	ITPRIPL1	inositol 1,4,5-trisphosphate receptor interacting protein-like 1 [Source:HGNC Symbol;Acc:29371]	protein_coding	1.25983	0.729057	0.126865	0.151849	0.0537746	1.18221	1.1928	1.25397	1.03153	0.264607	4
ENSG00000198901	PRC1	protein regulator of cytokinesis 1 [Source:HGNC Symbol;Acc:9341]	protein_coding	22.9302	5.65486	1.77905	1.40168	1.28997	12.2317	15.3164	16.6831	3.95439	3.53044	4
ENSG00000199753	SNORD104	small nucleolar RNA, C/D box 104 [Source:HGNC Symbol;Acc:32768]	snoRNA	17.4394	10.3989	13.1271	4.07424	6.98925	18.3057	14.4517	12.2401	12.0309	4.73213	4
ENSG00000200087	SNORA73B	small nucleolar RNA, H/ACA box 73B [Source:HGNC Symbol;Acc:10116]	snoRNA	17.7717	15.5928	4.37587	3.34975	4.60868	10.2457	11.4156	15.8576	10.2959	3.51682	4
ENSG00000200534	SNORA33	small nucleolar RNA, H/ACA box 33 [Source:HGNC Symbol;Acc:32623]	snoRNA	11.9519	8.15991	9.24152	4.33335	3.26092	10.3396	8.28536	5.78052	6.12545	4.05521	4
ENSG00000202031	SNORD38A	small nucleolar RNA, C/D box 38A [Source:HGNC Symbol;Acc:30355]	snoRNA	8.27009	6.50859	4.91678	3.18575	2.23274	7.1735	4.50399	5.45355	4.59845	1.6347	4
ENSG00000203760	CENPW	centromere protein W [Source:HGNC Symbol;Acc:21488]	protein_coding	19.891	4.95199	4.85529	2.94999	3.18735	11.22	12.8916	13.505	3.75656	2.37025	4
ENSG00000203995	ZYG11A	zyg-11 homolog A (C. elegans) [Source:HGNC Symbol;Acc:32058]	protein_coding	1.30163	0.73262	0.332534	0.296148	0.124799	0.484889	0.539368	0.38817	0.227616	0.0585192	4
ENSG00000204366	ZBTB12	zinc finger and BTB domain containing 12 [Source:HGNC Symbol;Acc:19066]	protein_coding	4.01392	2.28538	1.79656	1.56996	1.3829	3.99184	3.36755	3.00169	3.07827	1.87498	4
ENSG00000205683	DPF3	D4, zinc and double PHD fingers, family 3 [Source:HGNC Symbol;Acc:17427]	protein_coding	4.03319	1.90365	0.37682	0.308662	0.590115	1.92655	2.11787	2.05635	0.695873	0.953111	4
ENSG00000207870	MIR221	microRNA 221 [Source:HGNC Symbol;Acc:31601]	miRNA	33.9102	18.0279	17.2055	14.2413	16.769	22.6605	32.0184	29.5247	12.2985	14.3712	4
ENSG00000209482	SNORD83A	small nucleolar RNA, C/D box 83A [Source:HGNC Symbol;Acc:17131]	snoRNA	12.8121	9.27917	4.57086	3.06971	2.81714	8.22876	5.30738	7.52378	3.93711	2.27982	4
ENSG00000213160	KLHL23	kelch-like 23 (Drosophila) [Source:HGNC Symbol;Acc:27506]	protein_coding	1.12696	0.990441	0.27131	0.301291	0.262792	0.85288	0.86111	0.740529	0.426733	0.141232	4
ENSG00000213347	MXD3	MAX dimerization protein 3 [Source:HGNC Symbol;Acc:14008]	protein_coding	2.68341	1.10893	1.18544	0.870883	0.841072	1.61447	1.67664	1.93758	1.0709	0.80401	4
ENSG00000214018	RRM2P3	ribonucleotide reductase M2 polypeptide pseudogene 3 [Source:HGNC Symbol;Acc:10455]	pseudogene	3.24067	0.745984	0.168113	0.0915881	0.154617	1.47811	1.97491	2.14516	0.300705	0.353337	4
ENSG00000214182	PTMAP5	prothymosin, alpha pseudogene 5 [Source:HGNC Symbol;Acc:9628]	pseudogene	6.00386	3.03808	2.74677	1.19065	0.998775	4.38098	4.41652	4.49948	4.41875	1.76646	4
ENSG00000214357	NEURL1B	neuralized homolog 1B (Drosophila) [Source:HGNC Symbol;Acc:35422]	protein_coding	2.06399	0.641534	0.282896	0.191913	0.143182	2.92553	3.14778	3.48986	1.68843	0.846103	4
ENSG00000214653	HNRNPA3P3	heterogeneous nuclear ribonucleoprotein A3 pseudogene 3 [Source:HGNC Symbol;Acc:39772]	pseudogene	1.37615	0.821904	0.632718	0.637975	0.49256	1.3864	1.44715	1.28205	1.09166	0.614735	4
ENSG00000214826	DDX12P	DEAD/H (Asp-Glu-Ala-Asp/His) box polypeptide 12, pseudogene [Source:HGNC Symbol;Acc:2737]	pseudogene	3.29583	0.932657	0.416437	0.584982	0.633104	2.15902	2.1295	2.3273	1.17024	1.07078	4
ENSG00000215417	MIR17HG	miR-17-92 cluster host gene (non-protein coding) [Source:HGNC Symbol;Acc:23564]	processed_transcript	0.82814	0.252654	0.566451	0.223937	0.107137	0.789806	0.455062	0.431689	0.422675	0.197518	4
ENSG00000215784	FAM72D	family with sequence similarity 72, member D [Source:HGNC Symbol;Acc:33593]	protein_coding	1.4208	0.446609	0.365373	0.292964	0.202822	0.829055	0.855799	0.887044	0.390974	0.342966	4
ENSG00000218422	AC016773.1		pseudogene	0.513785	0.145465	0.0787931	0.109228	0.0847685	0.335175	0.406313	0.531804	0.185347	0.258973	4
ENSG00000218502	H2AFZP3	H2A histone family, member Z pseudogene 3 [Source:HGNC Symbol;Acc:38013]	pseudogene	19.1727	6.25964	8.00715	4.73775	5.93421	13.3213	12.9167	15.0412	8.5998	4.73721	4
ENSG00000223477	RP11-314P12.2		lincRNA	1.36314	1.33395	0.218576	0.210394	0.248887	0.256324	0.405601	0.822241	0.488158	0.577532	4
ENSG00000224126	UBE2SP2	ubiquitin-conjugating enzyme E2S pseudogene 2 [Source:HGNC Symbol;Acc:32196]	pseudogene	21.6522	7.85734	9.88287	5.11866	3.80559	15.5971	15.7007	19.069	11.4409	7.42563	4
ENSG00000224411	RP11-1033A18.1		pseudogene	35.1897	23.3917	11.5807	13.7731	15.8376	27.2883	30.3599	30.0586	17.9499	36.3702	4
ENSG00000224578	CTD-2119F7.2		pseudogene	22.7161	15.2445	15.0452	9.59068	8.42131	21.3236	18.5546	18.3497	15.5632	8.93606	4
ENSG00000225159	RP11-40H20.2		pseudogene	3.69974	2.75046	2.24138	1.58527	1.24409	2.95574	2.76137	2.69953	2.649	1.43293	4
ENSG00000225976	RP11-192N10.2		pseudogene	6.01086	2.62546	2.4445	1.12559	1.55883	4.05141	4.72468	5.42998	2.57048	1.81624	4
ENSG00000226261	AC064836.3		pseudogene	0.828609	0.187481	0.0846642	0.104923	0.176116	0.613682	0.454659	0.551963	0.304034	0.132548	4
ENSG00000226650	KIF4B	kinesin family member 4B [Source:HGNC Symbol;Acc:6322]	protein_coding	0.414909	0.109025	0.0362676	0.00985131	0.0206189	0.322293	0.347358	0.389531	0.0962256	0.0756081	4
ENSG00000226790	HNRNPA3P1	heterogeneous nuclear ribonucleoprotein A3 pseudogene 1 [Source:HGNC Symbol;Acc:13729]	pseudogene	2.95528	1.63916	1.74515	1.34451	0.997445	3.24671	2.87689	2.9096	2.3833	1.56482	4
ENSG00000226950	DANCR	differentiation antagonizing non-protein coding RNA [Source:HGNC Symbol;Acc:28964]	lincRNA	17.1542	9.37696	7.28948	5.91937	5.30051	9.04069	9.15325	9.87026	10.2982	4.76354	4
ENSG00000228716	DHFR	dihydrofolate reductase [Source:HGNC Symbol;Acc:2861]	protein_coding	17.6538	5.48412	3.299	2.82376	3.55935	9.03754	10.3537	10.0792	3.77095	3.68431	4
ENSG00000230002	ALMS1-IT1	ALMS1 intronic transcript 1 (non-protein coding) [Source:HGNC Symbol;Acc:41305]	sense_intronic	0.488279	0.198222	0.116307	0.182417	0.112156	0.344006	0.253159	0.167937	0.0969702	0.0636328	4
ENSG00000230165	CTB-1144G6.5		pseudogene	2.43947	1.04438	0.286572	0.0865556	0.203569	1.68796	1.95929	1.90719	0.474619	0.779274	4
ENSG00000230356	NCAPD2P1	non-SMC condensin I complex, subunit D2 pseudogene 1 [Source:HGNC Symbol;Acc:43831]	pseudogene	0.561033	0.227693	0.167172	0.189983	0.0721459	0.333788	0.392599	0.3672	0.100544	0.0975759	4
ENSG00000230453	ANKRD18B	ankyrin repeat domain 18B [Source:HGNC Symbol;Acc:23644]	protein_coding	0.748695	0.361558	0.129037	0.0881124	0.028044	0.532123	0.422791	0.565566	0.392211	0.155789	4
ENSG00000230615	RP5-1198O20.4		lincRNA	0.279663	0.144941	0.0317829	0.0318462	0.166883	0.110025	0.206811	0.20191	0.0454647	0.0890173	4
ENSG00000231007	CDC20P1	cell division cycle 20 homolog (S. cerevisiae) pseudogene 1 [Source:HGNC Symbol;Acc:29487]	pseudogene	2.96422	0.601737	0.473484	0.792328	0.666825	1.20851	1.65353	1.98773	0.420814	0.235357	4
ENSG00000231607	DLEU2	deleted in lymphocytic leukemia 2 (non-protein coding) [Source:HGNC Symbol;Acc:13748]	lincRNA	0.979469	0.319037	0.354825	0.293352	0.175467	0.770271	0.707691	0.830513	0.332684	0.219844	4
ENSG00000232486	RP11-18B3.2		pseudogene	0.334534	0.0657101	0.0116882	0.0082214	0.0186142	0.202747	0.196802	0.253498	0.0555692	0.0338568	4
ENSG00000232794	RP11-33N11.1		pseudogene	1.97186	1.13724	0.959705	0.830357	0.851469	1.83479	1.56632	1.69188	1.22994	0.852735	4
ENSG00000232956	SNHG15	small nucleolar RNA host gene 15 (non-protein coding) [Source:HGNC Symbol;Acc:27797]	lincRNA	11.052	7.41621	6.06296	3.86818	5.29118	7.70134	7.21535	7.84281	7.20729	3.28054	4
ENSG00000233058	AC046143.7		lincRNA	0.669223	0.515611	0.180584	0.212898	0.314304	0.420467	0.350051	0.231865	0.227778	0.189501	4
ENSG00000233155	HMGA1P8	high mobility group AT-hook 1 pseudogene 8 [Source:HGNC Symbol;Acc:39183]	pseudogene	21.0423	10.1331	4.20737	4.09315	3.50116	22.1694	24.3954	20.075	12.1617	24.7974	4
ENSG00000234964	FABP5P7	fatty acid binding protein 5 pseudogene 7 [Source:HGNC Symbol;Acc:31070]	pseudogene	4.5287	1.60377	0.809667	0.580704	0.236767	2.73381	2.67867	2.41779	1.13809	0.44365	4
ENSG00000235036	RP5-1099D15.1		pseudogene	5.57551	2.08317	1.88734	1.56259	2.11652	3.66932	4.45633	4.64953	2.31447	2.51177	4
ENSG00000235041	RP11-330M2.4		pseudogene	9.75311	4.51761	5.08046	2.16602	2.11063	6.00472	6.40808	6.92508	7.00188	2.53181	4
ENSG00000235489	RP11-386C23.1		pseudogene	0.881456	0.457742	0.30174	0.263029	0.209205	0.706408	0.743233	0.810269	0.587313	0.267255	4
ENSG00000236581	STARD13-AS2	STARD13 antisense RNA 2 [Source:HGNC Symbol;Acc:40873]	antisense	1.95738	0.45909	0.643865	0.438977	0.452221	1.45493	0.678517	0.410954	0.130115	0.357202	4
ENSG00000237240	U47924.25	Uncharacterized protein [Source:UniProtKB/TrEMBL;Acc:F8WDL1]	protein_coding	1.94607	0.823076	0.531551	0.530532	0.536135	1.62659	1.81661	2.05951	1.23303	0.792058	4
ENSG00000237649	KIFC1	kinesin family member C1 [Source:HGNC Symbol;Acc:6389]	protein_coding	14.5128	2.89807	0.909697	0.374927	0.333262	8.10898	10.135	12.3244	2.12807	1.8908	4
ENSG00000238249	HMGN2P17	high mobility group nucleosomal binding domain 2 pseudogene 17 [Source:HGNC Symbol;Acc:39381]	pseudogene	12.9765	5.12441	5.37244	3.34956	2.56525	8.6992	8.64753	8.74086	5.77846	2.7864	4
ENSG00000238266	RP11-799O21.1		lincRNA	0.344493	0.0857565	0.0158473	0.0136598	0.0108681	0.217589	0.330239	0.247216	0.0454317	0.0662579	4
ENSG00000238917	SNORD10	small nucleolar RNA, C/D box 10 [Source:HGNC Symbol;Acc:32706]	snoRNA	24.9273	18.3776	11.0717	12.6563	6.02751	25.5095	14.6294	14.529	10.3148	8.42123	4
ENSG00000239713	APOBEC3G	apolipoprotein B mRNA editing enzyme, catalytic polypeptide-like 3G [Source:HGNC Symbol;Acc:17357]	protein_coding	1.83199	1.32965	1.20402	0.982902	0.907802	1.34524	1.22495	1.23222	1.70059	0.837574	4
ENSG00000240747	KRBOX1	KRAB box domain containing 1 [Source:HGNC Symbol;Acc:38708]	protein_coding	1.80975	1.00933	0.0393665	0.0419647	0.0639413	0.775266	0.716288	1.01833	1.15882	0.568619	4
ENSG00000240859	AC093627.10		lincRNA	0.25561	0.247587	0.0500674	0.0449295	0.0895657	0.209251	0.176312	0.126441	0.0813925	0.0576278	4
ENSG00000241343	RPL36A	ribosomal protein L36a [Source:HGNC Symbol;Acc:10359]	protein_coding	4.46568	2.39024	2.52061	1.81744	0.937977	3.70404	2.75937	2.73474	2.00672	1.70647	4
ENSG00000241634	RP11-381E24.1		pseudogene	2.1033	0.815598	0.476353	0.305208	0.304978	1.2155	1.41758	1.75818	0.387655	0.763181	4
ENSG00000241749	RPSAP52	ribosomal protein SA pseudogene 52 [Source:HGNC Symbol;Acc:35752]	pseudogene	7.2522	2.98935	1.13787	0.841371	2.0367	2.84972	2.60454	2.15679	0.751012	1.43997	4
ENSG00000242125	SNHG3	small nucleolar RNA host gene 3 (non-protein coding) [Source:HGNC Symbol;Acc:10118]	processed_transcript	21.3977	12.1982	8.93294	5.57008	6.40105	13.133	12.974	15.1405	8.63813	5.32002	4
ENSG00000242265	PEG10	paternally expressed 10 [Source:HGNC Symbol;Acc:14005]	protein_coding	14.9038	4.92012	3.17158	2.71362	3.19887	11.1709	10.054	8.64979	5.23266	3.68571	4
ENSG00000242629	RP11-89C21.2		processed_transcript	1.08788	0.719651	1.03465	0.80042	0.466103	1.08642	0.945342	0.922468	0.905981	0.361289	4
ENSG00000243157				1.33513	0.693297	0.546716	0.391081	0.153555	1.03667	0.845522	0.822028	0.595922	0.0485846	4
ENSG00000248394	FOSL1P1	FOS-like antigen 1 pseudogene 1 [Source:HGNC Symbol;Acc:44055]	pseudogene	5.26736	3.24614	1.89493	2.45533	2.26818	5.31021	4.94655	6.09557	2.58163	4.3595	4
ENSG00000249121	RP11-81F11.3		processed_transcript	0.839632	0.220383	0.381971	0.312033	0.105886	0.698562	0.219469	0.300941	0.0874308	0.0976563	4
ENSG00000249258	RP11-468H14.2		lincRNA	0.407128	0.313875	0.176715	0.149268	0.057614	0.585122	0.358616	0.287381	0.178375	0.24714	4
ENSG00000249304	RP11-26P13.2		antisense	1.33247	0.886846	0.380838	0.578557	0.322511	2.43685	1.51448	2.04203	0.47564	0.758835	4
ENSG00000249353	RP11-65F13.1		pseudogene	10.1602	6.74639	5.38249	4.18705	3.25296	7.01615	7.23343	6.95975	6.4668	3.40354	4
ENSG00000254244	PAICSP4	phosphoribosylaminoimidazole carboxylase, phosphoribosylaminoimidazole succinocarboxamide synthetase pseudogene 4 [Source:HGNC Symbol;Acc:38097]	pseudogene	8.74189	4.11873	1.94825	1.60277	2.01673	5.83484	6.38154	6.0808	3.698	2.16431	4
ENSG00000255397	AC022182.2		pseudogene	1.46383	0.565154	0.369341	0.390452	0.340818	1.22088	1.44078	1.57743	0.615791	0.430913	4
ENSG00000255717	SNHG1	small nucleolar RNA host gene 1 (non-protein coding) [Source:HGNC Symbol;Acc:32688]	processed_transcript	16.6284	7.82617	4.60197	2.97157	4.08912	11.1763	11.0816	13.354	10.0337	4.62582	4
ENSG00000256268	RP11-221N13.3		lincRNA	3.67714	1.87117	0.390567	0.432864	1.04422	3.12761	3.20328	2.55359	1.86717	3.88971	4
ENSG00000256663	RP11-424C20.2		pseudogene	10.6168	2.58054	0.87358	0.741935	0.792721	5.1138	7.09369	7.60941	1.66911	1.8335	4
ENSG00000257167	TMPO-AS1	TMPO antisense RNA 1 [Source:HGNC Symbol;Acc:44158]	lincRNA	0.706838	0.1337	0.151733	0.0575505	0.0811774	0.326783	0.456138	0.501596	0.14001	0.129512	4
ENSG00000257199	RP11-669B18.1		pseudogene	5.50547	2.5152	2.60947	1.43431	1.75964	4.28672	4.97177	4.7565	3.04974	1.92669	4
ENSG00000258445	RP11-307P22.1		pseudogene	3.28511	0.609258	0.346954	0.240227	0.304785	1.56721	1.81906	2.06989	0.443916	0.41963	4
ENSG00000259781	RP11-673C5.1		pseudogene	6.93953	2.65982	4.37046	3.64662	3.25978	5.6695	6.37272	5.98554	4.51037	2.24959	4
ENSG00000259901	RP5-991G20.4		antisense	1.63749	0.683155	0.623012	0.690333	0.578216	1.01737	0.847459	0.938037	0.588474	0.444147	4
ENSG00000260260	RP11-304L19.5		lincRNA	42.1168	20.3788	18.1158	8.78161	5.8186	21.0104	23.4392	20.9546	18.0992	8.90593	4
ENSG00000000971	CFH	complement factor H [Source:HGNC Symbol;Acc:4883]	protein_coding	0.908867	3.5116	10.3862	15.6242	32.1379	6.17161	5.88994	6.76334	7.36256	0.985283	5
ENSG00000001561	ENPP4	ectonucleotide pyrophosphatase/phosphodiesterase 4 (putative) [Source:HGNC Symbol;Acc:3359]	protein_coding	0.335853	0.949863	3.57225	5.55414	12.9839	0.214109	0.267066	0.18053	0.501874	2.20062	5
ENSG00000002746	HECW1	HECT, C2 and WW domain containing E3 ubiquitin protein ligase 1 [Source:HGNC Symbol;Acc:22195]	protein_coding	0.402471	0.596575	0.616552	0.957237	1.25706	0.28903	0.300767	0.546203	0.800808	1.15984	5
ENSG00000006210	CX3CL1	chemokine (C-X3-C motif) ligand 1 [Source:HGNC Symbol;Acc:10647]	protein_coding	0.0717264	0.0829878	0.0226965	0.0395848	0.512927	0.0825895	0.0670502	0.0463078	0.106902	0.183209	5
ENSG00000006747	SCIN	scinderin [Source:HGNC Symbol;Acc:21695]	protein_coding	1.34737	2.12842	0.360527	0.687326	2.37122	0.0200402	0.0187191	0.0144863	0.0427673	0.39847	5
ENSG00000007933	FMO3	flavin containing monooxygenase 3 [Source:HGNC Symbol;Acc:3771]	protein_coding	0.0925981	0.523565	1.4256	1.51006	2.89611	0.21999	0.198906	0.204142	0.116262	0.0711957	5
ENSG00000008735	MAPK8IP2	mitogen-activated protein kinase 8 interacting protein 2 [Source:HGNC Symbol;Acc:6883]	protein_coding	0.132115	0.170285	0.331694	0.322706	0.935733	0.116438	0.113534	0.102319	0.219665	0.453398	5
ENSG00000010030	ETV7	ets variant 7 [Source:HGNC Symbol;Acc:18160]	protein_coding	0.397813	0.949652	0.738048	0.794914	1.26709	0.16086	0.124463	0.132745	0.218117	0.464111	5
ENSG00000010404	IDS	iduronate 2-sulfatase [Source:HGNC Symbol;Acc:5389]	protein_coding	7.7249	10.2849	11.2169	14.1983	24.3658	7.81764	7.54491	7.778	8.63483	17.7596	5
ENSG00000011347	SYT7	synaptotagmin VII [Source:HGNC Symbol;Acc:11514]	protein_coding	0.115875	0.147073	0.0473418	0.0730043	0.345892	0.259906	0.114154	0.0277006	0.0468842	0.0501897	5
ENSG00000011465	DCN	decorin [Source:HGNC Symbol;Acc:2705]	protein_coding	81.6273	234.364	333.785	382.028	391.911	202.647	199.556	244.273	411.887	108.293	5
ENSG00000012171	SEMA3B	sema domain, immunoglobulin domain (Ig), short basic domain, secreted, (semaphorin) 3B [Source:HGNC Symbol;Acc:10724]	processed_transcript	7.98808	11.7853	21.1665	21.6908	24.8075	16.4669	14.2891	16.6577	31.0472	9.17171	5
ENSG00000025423	HSD17B6	hydroxysteroid (17-beta) dehydrogenase 6 homolog (mouse) [Source:HGNC Symbol;Acc:23316]	protein_coding	0.525643	1.10443	1.5044	1.09708	1.27331	0.239063	0.457655	0.729466	0.760737	0.874875	5
ENSG00000029534	ANK1	ankyrin 1, erythrocytic [Source:HGNC Symbol;Acc:492]	protein_coding	2.74956	4.2064	1.93092	2.56222	6.69023	0.382982	0.381004	0.374941	0.485412	2.62301	5
ENSG00000044524	EPHA3	EPH receptor A3 [Source:HGNC Symbol;Acc:3387]	protein_coding	0.0161676	0.0125758	0.0115464	0.0109205	0.235751	0.0213987	0.0217511	0.130041	0.0575656	0.021908	5
ENSG00000047346	FAM214A	family with sequence similarity 214, member A [Source:HGNC Symbol;Acc:25609]	protein_coding	5.25912	6.93408	5.79153	7.76725	12.5076	2.70821	2.45902	2.5723	2.73331	6.03673	5
ENSG00000049540	ELN	elastin [Source:HGNC Symbol;Acc:3327]	protein_coding	2.96367	2.23965	24.2025	23.0364	28.0732	0.373187	1.15366	1.59749	0.138214	0.0375143	5
ENSG00000053747	LAMA3	laminin, alpha 3 [Source:HGNC Symbol;Acc:6483]	protein_coding	5.13152	9.9706	4.36236	7.46441	11.449	0.168078	0.12624	0.068713	0.152924	1.14531	5
ENSG00000055732	MCOLN3	mucolipin 3 [Source:HGNC Symbol;Acc:13358]	protein_coding	0.133467	0.308155	0.330929	0.458143	0.567565	0.0226429	0.0174126	0.00886214	0.0165916	0.12498	5
ENSG00000057657	PRDM1	PR domain containing 1, with ZNF domain [Source:HGNC Symbol;Acc:9346]	protein_coding	2.06218	1.63862	2.26036	2.98503	5.16374	1.19023	0.985711	0.985828	0.669546	1.98428	5
ENSG00000060140	STYK1	serine/threonine/tyrosine kinase 1 [Source:HGNC Symbol;Acc:18889]	protein_coding	0.522352	0.473402	0.223496	0.295938	0.877618	0.111705	0.208505	0.243234	0.198337	0.34546	5
ENSG00000061455	PRDM6	PR domain containing 6 [Source:HGNC Symbol;Acc:9350]	protein_coding	0.0913015	0.0570383	0.17417	0.236743	0.286795	0.210936	0.111701	0.0179037	0.0104062	0.0390305	5
ENSG00000061918	GUCY1B3	guanylate cyclase 1, soluble, beta 3 [Source:HGNC Symbol;Acc:4687]	protein_coding	0.711007	1.80029	1.50964	1.98247	3.47188	1.49648	0.914315	1.04313	1.56257	0.750228	5
ENSG00000063180	CA11	carbonic anhydrase XI [Source:HGNC Symbol;Acc:1370]	protein_coding	3.7914	5.66878	3.18047	3.50365	10.1451	2.0953	1.56991	1.00306	1.60554	3.87397	5
ENSG00000064309	CDON	Cdon homolog (mouse) [Source:HGNC Symbol;Acc:17104]	protein_coding	0.716993	1.69539	1.39575	2.01429	3.79317	0.192327	0.147765	0.112907	0.109615	0.25569	5
ENSG00000065717	TLE2	transducin-like enhancer of split 2 (E(sp1) homolog, Drosophila) [Source:HGNC Symbol;Acc:11838]	protein_coding	0.578434	0.623786	1.34322	1.27085	1.32269	0.202105	0.237771	0.167212	0.0633212	0.061125	5
ENSG00000065923	SLC9A7	solute carrier family 9, subfamily A (NHE7, cation proton antiporter 7), member 7 [Source:HGNC Symbol;Acc:17123]	protein_coding	7.68267	9.00257	4.93916	8.03188	15.7848	5.05859	6.09746	5.52408	5.23822	11.7545	5
ENSG00000067715	SYT1	synaptotagmin I [Source:HGNC Symbol;Acc:11509]	protein_coding	0.0765855	0.113443	0.45125	0.853567	16.5208	1.53539	1.13583	2.25522	3.3175	1.2353	5
ENSG00000069431	ABCC9	ATP-binding cassette, sub-family C (CFTR/MRP), member 9 [Source:HGNC Symbol;Acc:60]	protein_coding	1.11899	2.03922	2.75467	4.35507	6.78307	0.336568	0.365574	0.651474	0.366566	0.16597	5
ENSG00000069667	RORA	RAR-related orphan receptor A [Source:HGNC Symbol;Acc:10258]	protein_coding	0.482096	0.613209	1.05053	1.3522	2.85294	0.481612	0.462216	0.266847	0.352635	0.897699	5
ENSG00000073146	MOV10L1	Mov10l1, Moloney leukemia virus 10-like 1, homolog (mouse) [Source:HGNC Symbol;Acc:7201]	protein_coding	0.374072	0.811983	0.358306	0.485831	1.03831	0.537434	0.549509	0.473598	0.443404	0.226379	5
ENSG00000074527	NTN4	netrin 4 [Source:HGNC Symbol;Acc:13658]	protein_coding	74.277	167.768	247.214	278.105	373	41.0882	41.2969	47.8572	62.0689	27.4221	5
ENSG00000076356	PLXNA2	plexin A2 [Source:HGNC Symbol;Acc:9100]	protein_coding	0.358308	0.337525	0.544498	0.697553	0.345397	0.340883	0.300586	0.320058	0.158647	0.575934	5
ENSG00000077942	FBLN1	fibulin 1 [Source:HGNC Symbol;Acc:3600]	protein_coding	204.655	470.066	346.718	442.773	602.177	48.223	39.6772	38.9869	41.505	19.2619	5
ENSG00000078018	MAP2	microtubule-associated protein 2 [Source:HGNC Symbol;Acc:6839]	protein_coding	5.06986	4.66473	1.49383	2.12772	5.76319	0.798334	0.841062	1.29992	2.99982	1.49767	5
ENSG00000078401	EDN1	endothelin 1 [Source:HGNC Symbol;Acc:3176]	protein_coding	15.0574	18.2701	7.70761	10.2766	23.8038	10.7063	8.35949	10.4136	3.77871	13.0358	5
ENSG00000078487	ZCWPW1	zinc finger, CW type with PWWP domain 1 [Source:HGNC Symbol;Acc:23486]	protein_coding	0.533988	0.623725	0.882629	0.945884	1.26681	0.361696	0.250364	0.254631	0.480674	0.825882	5
ENSG00000079215	SLC1A3	solute carrier family 1 (glial high affinity glutamate transporter), member 3 [Source:HGNC Symbol;Acc:10941]	protein_coding	0.0701438	0.25006	1.54239	2.15751	1.44121	0.153792	0.0771388	0.0324288	0.0103467	0.0176113	5
ENSG00000079931	MOXD1	monooxygenase, DBH-like 1 [Source:HGNC Symbol;Acc:21063]	protein_coding	35.647	37.7137	40.6524	51.3222	181.28	27.2203	20.7353	13.3491	29.457	65.3992	5
ENSG00000080709	KCNN2	potassium intermediate/small conductance calcium-activated channel, subfamily N, member 2 [Source:HGNC Symbol;Acc:6291]	protein_coding	0.849008	0.480432	3.95346	5.62586	10.2496	1.13417	1.10237	0.919846	0.46514	1.25705	5
ENSG00000085831	TTC39A	tetratricopeptide repeat domain 39A [Source:HGNC Symbol;Acc:18657]	protein_coding	0.0924701	0.169728	0.116451	0.146978	0.254532	0.182507	0.14539	0.117743	0.239749	0.115528	5
ENSG00000086619	ERO1LB	ERO1-like beta (S. cerevisiae) [Source:HGNC Symbol;Acc:14355]	protein_coding	1.41947	2.00387	2.03765	2.3703	3.03237	2.17051	0.857437	0.910259	4.93922	1.54208	5
ENSG00000087076	HSD17B14	hydroxysteroid (17-beta) dehydrogenase 14 [Source:HGNC Symbol;Acc:23238]	protein_coding	0.839561	2.46375	15.3185	15.0733	16.5056	4.20921	2.46847	3.26604	9.85616	7.32565	5
ENSG00000087253	LPCAT2	lysophosphatidylcholine acyltransferase 2 [Source:HGNC Symbol;Acc:26032]	protein_coding	4.05771	3.7653	6.32056	7.3643	8.44487	2.38993	2.44306	2.32258	1.93138	4.65964	5
ENSG00000088367	EPB41L1	erythrocyte membrane protein band 4.1-like 1 [Source:HGNC Symbol;Acc:3378]	protein_coding	3.42815	4.67158	6.04908	7.83099	10.8531	4.46267	4.35324	4.21867	3.66982	8.20645	5
ENSG00000088538	DOCK3	dedicator of cytokinesis 3 [Source:HGNC Symbol;Acc:2989]	protein_coding	0.109181	0.127528	0.224843	0.294554	0.44338	0.112502	0.101612	0.110847	0.18532	0.256717	5
ENSG00000089847	ANKRD24	ankyrin repeat domain 24 [Source:HGNC Symbol;Acc:29424]	protein_coding	0.221053	0.242944	0.342011	0.376807	0.648081	0.209955	0.15815	0.142332	0.241824	0.661243	5
ENSG00000091262	ABCC6	ATP-binding cassette, sub-family C (CFTR/MRP), member 6 [Source:HGNC Symbol;Acc:57]	protein_coding	0.356934	0.630686	0.475478	0.739287	1.66097	0.36055	0.267849	0.21234	0.426244	0.325025	5
ENSG00000091513	TF	transferrin [Source:HGNC Symbol;Acc:11740]	protein_coding	0.0172752	0.0370459	0.0373969	0.0645934	0.0567496	0.0246086	0.0239036	0.0213255	0.0221057	0.0721514	5
ENSG00000092758	COL9A3	collagen, type IX, alpha 3 [Source:HGNC Symbol;Acc:2219]	protein_coding	0.0714359	0.078237	0.0847195	0.106482	0.178323	0.175838	0.127079	0.0993984	0.0682513	0.0422009	5
ENSG00000094963	FMO2	flavin containing monooxygenase 2 (non-functional) [Source:HGNC Symbol;Acc:3770]	protein_coding	0.0052885	0.012448	0.0435494	0.0411003	0.232151	0.130084	0.062809	0.028186	0.0381103	0.0132085	5
ENSG00000096696	DSP	desmoplakin [Source:HGNC Symbol;Acc:3052]	protein_coding	3.35899	6.28424	3.62339	4.42661	7.74325	1.35766	1.43669	1.69364	0.602527	0.677556	5
ENSG00000099260	PALMD	palmdelphin [Source:HGNC Symbol;Acc:15846]	protein_coding	0.0953238	0.210816	0.0533051	0.109195	1.12676	0.264424	0.369338	0.243601	0.146926	0.0785754	5
ENSG00000099785	MARCH2	membrane-associated ring finger (C3HC4) 2, E3 ubiquitin protein ligase [Source:HGNC Symbol;Acc:28038]	protein_coding	7.29467	9.49417	14.1687	12.4436	17.5354	7.92204	7.85866	6.94809	9.80023	16.8019	5
ENSG00000099869	IGF2-AS	IGF2 antisense RNA [Source:HGNC Symbol;Acc:14062]	protein_coding	0.029868	0.0980104	0.0809808	0.0552697	0.181667	0.0250193	0.0345273	0.10113	0.110105	0.00340465	5
ENSG00000100167	SEPT3	septin 3 [Source:HGNC Symbol;Acc:10750]	protein_coding	0.225322	0.23436	0.0541258	0.0904985	1.25154	0.175666	0.117264	0.103969	0.072454	0.302878	5
ENSG00000100307	CBX7	chromobox homolog 7 [Source:HGNC Symbol;Acc:1557]	protein_coding	2.42901	3.26508	4.06242	4.53646	10.2772	1.46669	1.19802	1.18648	1.83309	3.54366	5
ENSG00000100626	GALNTL1	UDP-N-acetyl-alpha-D-galactosamine:polypeptide N-acetylgalactosaminyltransferase-like 1 [Source:HGNC Symbol;Acc:23233]	protein_coding	0.183098	0.248911	0.560003	0.715277	2.41922	0.388723	0.356585	0.440805	0.294912	0.808658	5
ENSG00000101134	DOK5	docking protein 5 [Source:HGNC Symbol;Acc:16173]	protein_coding	0.368366	0.377671	3.55916	2.68162	2.16002	0.713685	0.461488	0.120753	0.0169797	0.0040114	5
ENSG00000101265	RASSF2	Ras association (RalGDS/AF-6) domain family member 2 [Source:HGNC Symbol;Acc:9883]	protein_coding	2.00821	5.81567	7.29099	8.89911	20.3959	7.995	6.43769	9.69133	12.5668	6.07489	5
ENSG00000101825	MXRA5	matrix-remodelling associated 5 [Source:HGNC Symbol;Acc:7539]	protein_coding	17.5046	32.5042	41.1284	63.5697	98.6119	4.80936	3.81272	6.19047	2.22726	2.33389	5
ENSG00000102678	FGF9	fibroblast growth factor 9 (glia-activating factor) [Source:HGNC Symbol;Acc:3687]	protein_coding	0.0296561	0.0538381	1.98388	2.69535	4.79451	1.64596	1.38534	1.27661	3.83755	1.84037	5
ENSG00000102760	RGCC	regulator of cell cycle [Source:HGNC Symbol;Acc:20369]	protein_coding	28.7565	51.8825	131.934	64.6302	126.172	51.9034	73.4943	36.4395	54.5237	46.4055	5
ENSG00000102802	C13orf33	chromosome 13 open reading frame 33 [Source:HGNC Symbol;Acc:25926]	protein_coding	3.9014	3.36928	4.69617	5.6115	27.9628	0.864801	0.470498	0.240235	0.27512	0.0483897	5
ENSG00000103888	KIAA1199	KIAA1199 [Source:HGNC Symbol;Acc:29213]	protein_coding	640.247	971.471	384.86	470.39	1004.97	243.941	279.296	174.488	156.285	92.5264	5
ENSG00000104324	CPQ	carboxypeptidase Q [Source:HGNC Symbol;Acc:16910]	protein_coding	5.85084	12.0086	18.874	21.0235	35.7676	12.5073	11.5325	12.7168	20.0688	27.9789	5
ENSG00000104722	NEFM	neurofilament, medium polypeptide [Source:HGNC Symbol;Acc:7734]	protein_coding	0.776394	0.603966	1.16099	2.14116	18.2195	0.0283262	0.00894212	0.00972032	0.00443727	0.117018	5
ENSG00000104936	DMPK	dystrophia myotonica-protein kinase [Source:HGNC Symbol;Acc:2933]	protein_coding	33.0026	48.9817	51.5332	50.296	67.6573	27.0047	27.61	24.3758	24.3359	49.2667	5
ENSG00000105088	OLFM2	olfactomedin 2 [Source:HGNC Symbol;Acc:17189]	protein_coding	7.37536	11.9164	11.2719	11.0321	21.8197	4.40312	3.42948	4.09078	5.21673	0.430863	5
ENSG00000105246	EBI3	Epstein-Barr virus induced 3 [Source:HGNC Symbol;Acc:3129]	protein_coding	0.478432	1.42737	0.482367	0.460272	2.55468	0.214093	0.25528	0.393405	0.202342	1.40687	5
ENSG00000105499	PLA2G4C	phospholipase A2, group IVC (cytosolic, calcium-independent) [Source:HGNC Symbol;Acc:9037]	protein_coding	0.654422	2.35662	2.96214	3.71606	15.4994	0.722061	0.439814	0.305253	0.763488	1.37836	5
ENSG00000105784	RUNDC3B	RUN domain containing 3B [Source:HGNC Symbol;Acc:30286]	protein_coding	0.0350702	0.0174472	0.0220287	0.0210423	1.06409	0.0852495	0.0611071	0.159537	0.214188	0.282225	5
ENSG00000105989	WNT2	wingless-type MMTV integration site family member 2 [Source:HGNC Symbol;Acc:12780]	protein_coding	1.26919	4.43695	9.2024	7.65558	6.08208	1.77784	1.52624	1.06015	0.910736	0.0526589	5
ENSG00000106366	SERPINE1	serpin peptidase inhibitor, clade E (nexin, plasminogen activator inhibitor type 1), member 1 [Source:HGNC Symbol;Acc:8583]	protein_coding	655.977	802.347	359.799	399.845	679.543	318.939	410.088	448.61	282.533	674.453	5
ENSG00000106538	RARRES2	retinoic acid receptor responder (tazarotene induced) 2 [Source:HGNC Symbol;Acc:9868]	protein_coding	0.917345	8.5701	11.4058	5.999	12.2994	2.51415	2.23686	0.818959	1.98166	0.680663	5
ENSG00000106688	SLC1A1	solute carrier family 1 (neuronal/epithelial high affinity glutamate transporter, system Xag), member 1 [Source:HGNC Symbol;Acc:10939]	protein_coding	6.11403	13.1712	7.76866	10.0538	13.7237	3.68598	3.62721	3.54679	5.50071	10.8238	5
ENSG00000106823	ECM2	extracellular matrix protein 2, female organ and adipocyte specific [Source:HGNC Symbol;Acc:3154]	protein_coding	0.333741	1.20598	1.1866	1.46277	2.7238	0.178685	0.120155	0.239878	0.43217	0.0376282	5
ENSG00000107295	SH3GL2	SH3-domain GRB2-like 2 [Source:HGNC Symbol;Acc:10831]	protein_coding	0.0857586	0.0588663	0.062861	0.0497659	0.413809	0.0905312	0.0859312	0.0347716	0.00279546	0.192521	5
ENSG00000107317	PTGDS	prostaglandin D2 synthase 21kDa (brain) [Source:HGNC Symbol;Acc:9592]	protein_coding	1.30838	5.73868	21.5539	25.0144	25.2123	4.973	2.22961	1.95772	12.9474	11.0099	5
ENSG00000107731	UNC5B	unc-5 homolog B (C. elegans) [Source:HGNC Symbol;Acc:12568]	protein_coding	3.00776	4.66191	19.5103	19.4839	12.0502	9.34334	3.26012	5.50427	11.6829	2.06016	5
ENSG00000108001	EBF3	early B-cell factor 3 [Source:HGNC Symbol;Acc:19087]	protein_coding	0.69463	0.581673	2.64263	2.69354	2.2859	0.583033	0.461249	0.222744	0.0868992	0.0495884	5
ENSG00000108602	ALDH3A1	aldehyde dehydrogenase 3 family, member A1 [Source:HGNC Symbol;Acc:405]	protein_coding	0.0337103	0.0655255	0.0469998	0.0588088	0.315099	0.024188	0.0399769	0.0240604	0.0429425	0.161058	5
ENSG00000108691	CCL2	chemokine (C-C motif) ligand 2 [Source:HGNC Symbol;Acc:10618]	protein_coding	223.115	257.949	106.063	110.144	352.352	56.7982	91.0252	47.3246	50.1394	116.32	5
ENSG00000110203	FOLR3	folate receptor 3 (gamma) [Source:HGNC Symbol;Acc:3795]	protein_coding	0.659373	1.59	1.95672	2.24761	5.33668	0.246664	0.127283	0.160305	0.456099	0.684665	5
ENSG00000110318	KIAA1377	KIAA1377 [Source:HGNC Symbol;Acc:29264]	protein_coding	1.0477	1.30363	0.84904	1.40132	2.22593	0.811505	0.700091	0.761961	0.872422	1.64181	5
ENSG00000110347	MMP12	matrix metallopeptidase 12 (macrophage elastase) [Source:HGNC Symbol;Acc:7158]	lincRNA	0.0114142	0.00576367	0.0424512	0.0628996	1.39064	0.00564216	0.00861759	0.0194589	0.0157471	0.308936	5
ENSG00000110436	SLC1A2	solute carrier family 1 (glial high affinity glutamate transporter), member 2 [Source:HGNC Symbol;Acc:10940]	protein_coding	0.548204	0.542232	0.543162	0.864737	1.80091	0.513489	0.278151	0.248405	0.519941	0.504934	5
ENSG00000111110	PPM1H	protein phosphatase, Mg2+/Mn2+ dependent, 1H [Source:HGNC Symbol;Acc:18583]	protein_coding	0.177591	0.190256	0.310425	0.499901	1.71048	0.146547	0.107064	0.204079	0.273509	0.580055	5
ENSG00000111341	MGP	matrix Gla protein [Source:HGNC Symbol;Acc:7060]	protein_coding	0.0877536	0.640696	1.47685	1.8956	27.4639	0.11906	0.0890579	0.0763043	0.117076	0.55921	5
ENSG00000111452	GPR133	G protein-coupled receptor 133 [Source:HGNC Symbol;Acc:19893]	protein_coding	2.32995	9.94153	9.79497	12.7104	19.7028	0.0856074	0.0612113	0.0206109	0.0158662	0.0408252	5
ENSG00000111670	GNPTAB	N-acetylglucosamine-1-phosphate transferase, alpha and beta subunits [Source:HGNC Symbol;Acc:29670]	protein_coding	6.92772	13.3863	14.6442	19.8003	29.1955	8.77185	9.01734	8.64604	7.58396	15.5521	5
ENSG00000111799	COL12A1	collagen, type XII, alpha 1 [Source:HGNC Symbol;Acc:2188]	protein_coding	134.909	193.309	337.182	412.911	546.99	218.428	265.651	278.053	194.531	104.176	5
ENSG00000112379	KIAA1244	KIAA1244 [Source:HGNC Symbol;Acc:21213]	protein_coding	0.144701	0.188145	0.147607	0.187756	1.51242	0.0259414	0.0202543	0.0183312	0.02825	0.122908	5
ENSG00000112796	ENPP5	ectonucleotide pyrophosphatase/phosphodiesterase 5 (putative) [Source:HGNC Symbol;Acc:13717]	protein_coding	0.241675	0.879855	1.63746	2.6208	11.1948	0.0163941	0.0234657	0.0257445	0.0367745	0.409269	5
ENSG00000112837	TBX18	T-box 18 [Source:HGNC Symbol;Acc:11595]	protein_coding	7.51489	7.73372	10.7806	12.892	15.1982	0.218252	0.188263	0.122444	0.0328436	0.0127641	5
ENSG00000112902	SEMA5A	sema domain, seven thrombospondin repeats (type 1 and type 1-like), transmembrane domain (TM) and short cytoplasmic domain, (semaphorin) 5A [Source:HGNC Symbol;Acc:10736]	protein_coding	9.00391	16.5698	35.6072	52.5508	48.5562	9.3858	12.2808	16.352	11.9932	23.0165	5
ENSG00000112964	GHR	growth hormone receptor [Source:HGNC Symbol;Acc:4263]	protein_coding	0.233898	0.313296	0.53815	0.714777	1.95059	0.216191	0.179491	0.155442	0.114919	0.364107	5
ENSG00000113083	LOX	lysyl oxidase [Source:HGNC Symbol;Acc:6664]	protein_coding	154.417	361.295	171.409	216.242	428.854	85.8751	91.2907	71.8833	89.4462	41.5273	5
ENSG00000113369	ARRDC3	arrestin domain containing 3 [Source:HGNC Symbol;Acc:29263]	protein_coding	21.3334	16.9321	36.3557	37.1318	32.4949	20.8738	10.8037	8.81912	9.18841	7.28057	5
ENSG00000113578	FGF1	fibroblast growth factor 1 (acidic) [Source:HGNC Symbol;Acc:3665]	protein_coding	4.10094	7.38683	7.21698	8.31151	34.6577	3.08459	4.01231	3.80835	2.1639	6.16351	5
ENSG00000114805	PLCH1	phospholipase C, eta 1 [Source:HGNC Symbol;Acc:29185]	protein_coding	0.00651886	0.0153601	0.0509657	0.112586	0.314188	0.00546089	0.00447543	0.0094747	0.00965869	0.189334	5
ENSG00000115457	IGFBP2	insulin-like growth factor binding protein 2, 36kDa [Source:HGNC Symbol;Acc:5471]	protein_coding	12.5171	31.7433	37.3935	30.1035	109.264	2.74965	2.73258	1.8913	1.06765	6.59446	5
ENSG00000116032	GRIN3B	glutamate receptor, ionotropic, N-methyl-D-aspartate 3B [Source:HGNC Symbol;Acc:16768]	protein_coding	0.262802	0.563854	1.12744	1.45103	0.784829	0.487793	0.479278	0.796211	0.782143	1.00435	5
ENSG00000116183	PAPPA2	pappalysin 2 [Source:HGNC Symbol;Acc:14615]	protein_coding	0.0288685	0.0658573	0.307726	0.273671	0.107222	0.0173037	0.0416222	0.041302	0.0605909	0.115095	5
ENSG00000116678	LEPR	leptin receptor [Source:HGNC Symbol;Acc:6554]	protein_coding	2.28637	3.67562	3.13598	6.60317	28.0917	1.06951	0.985906	1.05323	0.930942	2.93614	5
ENSG00000116785	CFHR3	complement factor H-related 3 [Source:HGNC Symbol;Acc:16980]	protein_coding	0.0429075	0.079551	0.194269	0.306373	0.699743	0.114562	0.140327	0.149758	0.165557	0.0249662	5
ENSG00000117266	CDK18	cyclin-dependent kinase 18 [Source:HGNC Symbol;Acc:8751]	protein_coding	0.633907	0.865332	0.239368	0.388466	2.3987	0.208262	0.158766	0.0241076	0.0231546	0.0541079	5
ENSG00000117289	TXNIP	thioredoxin interacting protein [Source:HGNC Symbol;Acc:16952]	protein_coding	6.9109	29.341	38.9561	73.0963	19.0593	2.26882	1.55381	4.28713	1.71628	3.13023	5
ENSG00000117600	RP4-788L13.1	Lipid phosphate phosphatase-related protein type 4 [Source:UniProtKB/Swiss-Prot;Acc:Q7Z2D5]	protein_coding	4.36991	9.11049	5.779	8.14925	21.7718	6.48318	6.86225	15.3861	18.1491	2.34772	5
ENSG00000118898	PPL	periplakin [Source:HGNC Symbol;Acc:9273]	protein_coding	1.92656	4.74818	3.38597	3.51174	9.82658	1.33398	0.861095	0.281863	0.29147	0.287579	5
ENSG00000118971	CCND2	cyclin D2 [Source:HGNC Symbol;Acc:1583]	protein_coding	0.709405	2.39792	10.2763	12.1491	48.9794	2.12919	2.26777	1.68259	3.52799	27.8305	5
ENSG00000119862	LGALSL	lectin, galactoside-binding-like [Source:HGNC Symbol;Acc:25012]	protein_coding	0.675082	1.37354	1.39787	1.35894	2.46836	0.552032	0.421987	0.327769	0.399215	0.222339	5
ENSG00000119938	PPP1R3C	protein phosphatase 1, regulatory subunit 3C [Source:HGNC Symbol;Acc:9293]	protein_coding	7.86423	15.9072	27.281	22.2081	37.9055	7.44841	7.90788	6.05074	11.8304	16.4844	5
ENSG00000119946	CNNM1	cyclin M1 [Source:HGNC Symbol;Acc:102]	protein_coding	2.07461	2.07119	0.5372	0.875786	3.31353	0.213224	0.255319	0.188588	0.122746	0.514293	5
ENSG00000120324	PCDHB10	protocadherin beta 10 [Source:HGNC Symbol;Acc:8681]	protein_coding	0.270118	0.531691	0.530372	0.660517	0.77395	0.236885	0.192122	0.237619	0.380776	0.563842	5
ENSG00000121361	KCNJ8	potassium inwardly-rectifying channel, subfamily J, member 8 [Source:HGNC Symbol;Acc:6269]	protein_coding	1.5142	1.9964	3.7288	4.24226	7.5167	0.493035	0.636099	1.16844	0.521155	0.171926	5
ENSG00000121753	BAI2	brain-specific angiogenesis inhibitor 2 [Source:HGNC Symbol;Acc:944]	protein_coding	3.17718	5.79427	8.2994	10.6978	16.1116	6.01576	5.82923	6.27211	5.96319	12.7089	5
ENSG00000122176	FMOD	fibromodulin [Source:HGNC Symbol;Acc:3774]	protein_coding	6.33446	21.7253	24.4219	35.2724	120.029	3.90312	2.78577	1.89288	2.66445	7.12199	5
ENSG00000122786	CALD1	caldesmon 1 [Source:HGNC Symbol;Acc:1441]	protein_coding	126.682	178.18	224.825	261.472	253.94	96.0799	124.457	136.382	102.713	227.595	5
ENSG00000122877	EGR2	early growth response 2 [Source:HGNC Symbol;Acc:3239]	protein_coding	0.464045	0.763618	8.63682	12.1138	2.12763	0.887459	0.11888	0.174775	0.191466	0.390559	5
ENSG00000122986	HVCN1	hydrogen voltage-gated channel 1 [Source:HGNC Symbol;Acc:28240]	protein_coding	0.154607	0.211492	0.784144	0.80653	0.616459	0.598054	0.468274	0.391029	0.440164	0.260193	5
ENSG00000123095	BHLHE41	basic helix-loop-helix family, member e41 [Source:HGNC Symbol;Acc:16617]	protein_coding	1.72235	1.73115	0.646732	0.632828	4.2535	0.773448	0.452717	0.341225	0.461923	1.92551	5
ENSG00000123612	ACVR1C	activin A receptor, type IC [Source:HGNC Symbol;Acc:18123]	protein_coding	0.0305934	0.0337583	0.0785573	0.0950134	0.535134	0.0311366	0.0199517	0.035055	0.0246177	0.12871	5
ENSG00000124406	ATP8A1	ATPase, aminophospholipid transporter (APLT), class I, type 8A, member 1 [Source:HGNC Symbol;Acc:13531]	protein_coding	0.0252134	0.0383923	0.0970769	0.108379	0.156898	0.0601904	0.0435654	0.0321642	0.0186028	0.156743	5
ENSG00000124635	HIST1H2BJ	histone cluster 1, H2bj [Source:HGNC Symbol;Acc:4761]	protein_coding	0.726216	1.56994	2.21985	2.61722	3.31983	0.728603	0.966522	0.679267	0.767262	3.28088	5
ENSG00000125675	GRIA3	glutamate receptor, ionotropic, AMPA 3 [Source:HGNC Symbol;Acc:4573]	protein_coding	1.9796	3.85203	18.5249	23.4968	20.4203	0.0526913	0.0387858	0.00617178	0.00800231	0.00745419	5
ENSG00000125730	C3	complement component 3 [Source:HGNC Symbol;Acc:1318]	protein_coding	2.64003	17.4175	4.15355	7.03538	40.4139	0.140082	0.115391	0.060012	0.0672437	0.270376	5
ENSG00000126709	IFI6	interferon, alpha-inducible protein 6 [Source:HGNC Symbol;Acc:4054]	protein_coding	23.4498	37.0899	39.3784	36.2559	47.3211	15.518	12.8713	34.243	21.6508	22.0188	5
ENSG00000127241	MASP1	mannan-binding lectin serine peptidase 1 (C4/C2 activating component of Ra-reactive factor) [Source:HGNC Symbol;Acc:6901]	protein_coding	14.8283	32.1422	34.9822	46.8119	41.0325	11.3326	12.2823	12.3158	16.809	7.09274	5
ENSG00000127990	SGCE	sarcoglycan, epsilon [Source:HGNC Symbol;Acc:10808]	protein_coding	20.3161	27.7921	40.9807	44.9075	40.7471	19.0947	17.394	18.217	22.6231	7.74409	5
ENSG00000128268	MGAT3	mannosyl (beta-1,4-)-glycoprotein beta-1,4-N-acetylglucosaminyltransferase [Source:HGNC Symbol;Acc:7046]	protein_coding	0.0994148	0.366123	0.718982	1.12184	5.82578	0.940751	1.20952	0.476368	0.740776	3.53849	5
ENSG00000129009	ISLR	immunoglobulin superfamily containing leucine-rich repeat [Source:HGNC Symbol;Acc:6133]	protein_coding	2.69733	3.38758	33.7032	28.31	30.1856	0.467382	0.177506	0.0261111	0.0145428	0.0113036	5
ENSG00000129048	CCRL1	chemokine (C-C motif) receptor-like 1 [Source:HGNC Symbol;Acc:1611]	protein_coding	19.264	23.9451	23.4814	30.6267	132.809	0.388382	0.429487	0.349274	0.610106	1.264	5
ENSG00000130540	SULT4A1	sulfotransferase family 4A, member 1 [Source:HGNC Symbol;Acc:14903]	protein_coding	0.0850905	0.118377	0.111796	0.139449	1.49927	0.299919	0.295351	0.0620179	0.00293503	0.0433625	5
ENSG00000130558	OLFM1	olfactomedin 1 [Source:HGNC Symbol;Acc:17187]	protein_coding	0.378337	0.337216	0.579517	0.67118	0.992929	0.016645	0.0316457	0.0194441	0.00764743	0.0629236	5
ENSG00000130751	NPAS1	neuronal PAS domain protein 1 [Source:HGNC Symbol;Acc:7894]	protein_coding	1.95557	2.71456	5.20791	5.09016	7.41208	0.499166	0.655799	1.24581	0.827446	1.82769	5
ENSG00000130988	RGN	regucalcin (senescence marker protein-30) [Source:HGNC Symbol;Acc:9989]	protein_coding	1.88083	1.9606	4.42445	3.6474	4.56664	0.959502	0.648401	0.477228	0.455357	0.270256	5
ENSG00000132640	BTBD3	BTB (POZ) domain containing 3 [Source:HGNC Symbol;Acc:15854]	protein_coding	6.92463	9.01969	10.1886	14.7702	17.5609	7.64695	9.52431	9.61738	8.09921	17.4417	5
ENSG00000132846	ZBED3	zinc finger, BED-type containing 3 [Source:HGNC Symbol;Acc:20711]	protein_coding	1.67505	1.87585	1.14572	1.52807	3.2657	1.18971	0.845135	0.752843	0.794794	0.350656	5
ENSG00000134201	GSTM5	glutathione S-transferase mu 5 [Source:HGNC Symbol;Acc:4637]	protein_coding	1.9328	2.43539	2.33768	2.48568	4.29061	0.318382	0.2438	0.116607	0.130338	0.0415044	5
ENSG00000134245	WNT2B	wingless-type MMTV integration site family, member 2B [Source:HGNC Symbol;Acc:12781]	protein_coding	0.973956	1.05613	0.811202	0.972673	2.17273	0.344534	0.309103	0.265271	0.2619	0.573803	5
ENSG00000134594	RAB33A	RAB33A, member RAS oncogene family [Source:HGNC Symbol;Acc:9773]	protein_coding	0.47981	0.685308	1.10738	0.95357	1.21385	1.40588	0.618915	0.679544	0.7891	0.0573915	5
ENSG00000134602	MST4	Serine/threonine-protein kinase MST4 [Source:UniProtKB/Swiss-Prot;Acc:Q9P289]	protein_coding	0.211767	0.322577	3.79978	4.06696	1.90139	0.253937	0.209587	0.0453893	0.0213081	0.00291029	5
ENSG00000135218	CD36	CD36 molecule (thrombospondin receptor) [Source:HGNC Symbol;Acc:1663]	protein_coding	0.0683764	0.135251	0.352534	0.70851	10.0602	0.216327	0.194721	0.0923198	0.263935	1.13859	5
ENSG00000135525	MAP7	microtubule-associated protein 7 [Source:HGNC Symbol;Acc:6869]	protein_coding	0.491341	0.517207	0.622283	0.75796	1.86411	0.214905	0.281626	0.216051	0.273311	0.642766	5
ENSG00000135604	STX11	syntaxin 11 [Source:HGNC Symbol;Acc:11429]	protein_coding	0.86904	1.62818	3.67156	4.32938	3.99439	0.326441	0.52291	0.624014	0.658926	0.697243	5
ENSG00000135636	DYSF	dysferlin, limb girdle muscular dystrophy 2B (autosomal recessive) [Source:HGNC Symbol;Acc:3097]	protein_coding	0.154523	0.389144	0.038077	0.0596612	0.357024	0.0321274	0.0230696	0.0389305	0.0107876	0.0694946	5
ENSG00000135914	HTR2B	5-hydroxytryptamine (serotonin) receptor 2B, G protein-coupled [Source:HGNC Symbol;Acc:5294]	protein_coding	0.160791	0.183786	1.34963	1.18543	0.541815	0.839274	0.264767	0.323526	0.854378	0.0783429	5
ENSG00000135929	CYP27A1	cytochrome P450, family 27, subfamily A, polypeptide 1 [Source:HGNC Symbol;Acc:2605]	protein_coding	2.39039	4.34779	5.07647	5.40309	6.1461	5.84803	3.6844	2.13081	3.03527	2.06307	5
ENSG00000136002	ARHGEF4	Rho guanine nucleotide exchange factor (GEF) 4 [Source:HGNC Symbol;Acc:684]	protein_coding	1.72509	2.49589	1.27134	1.39722	2.90647	0.243954	0.24569	0.187427	0.11516	0.106717	5
ENSG00000136040	PLXNC1	plexin C1 [Source:HGNC Symbol;Acc:9106]	protein_coding	2.0827	7.88312	1.34802	2.47734	9.14859	1.19752	0.761852	0.662949	1.6704	1.5412	5
ENSG00000136235	GPNMB	glycoprotein (transmembrane) nmb [Source:HGNC Symbol;Acc:4462]	protein_coding	17.4187	38.5578	67.2448	95.0614	101.988	7.33559	3.62626	1.98082	1.61615	3.2363	5
ENSG00000136367	ZFHX2	zinc finger homeobox 2 [Source:HGNC Symbol;Acc:20152]	protein_coding	0.279679	0.57552	0.843167	1.30861	1.23154	0.191737	0.255309	0.139127	0.106881	0.594063	5
ENSG00000136869	TLR4	toll-like receptor 4 [Source:HGNC Symbol;Acc:11850]	protein_coding	2.57287	3.73452	1.02954	2.04306	6.18299	0.00555845	0.00131203	0	0.00209589	0.101807	5
ENSG00000136928	GABBR2	gamma-aminobutyric acid (GABA) B receptor, 2 [Source:HGNC Symbol;Acc:4507]	protein_coding	2.53212	9.00623	5.52874	7.0897	7.33391	1.48571	2.01813	0.783825	0.434871	1.75907	5
ENSG00000137672	TRPC6	transient receptor potential cation channel, subfamily C, member 6 [Source:HGNC Symbol;Acc:12338]	protein_coding	1.81126	3.12356	12.406	13.3278	16.2208	1.57636	2.60784	3.29233	2.40285	1.10872	5
ENSG00000137801	THBS1	thrombospondin 1 [Source:HGNC Symbol;Acc:11785]	protein_coding	632.926	632.261	1100.53	1221.95	1538.35	236.204	241.892	204.226	103.766	345.254	5
ENSG00000137808	RP11-809H16.2		processed_transcript	0.0445072	0.0177379	0.260599	0.396693	0.579262	0.0214116	0.0222063	0.0279938	0.0207848	0.0750882	5
ENSG00000137960	GIPC2	GIPC PDZ domain containing family, member 2 [Source:HGNC Symbol;Acc:18177]	protein_coding	0.308173	0.369483	0.135108	0.150482	1.40626	0.0709432	0.0794622	0.0460148	0.0414911	0.245143	5
ENSG00000137975	CLCA2	chloride channel accessory 2 [Source:HGNC Symbol;Acc:2016]	protein_coding	0.488554	2.25624	0.510785	1.26307	4.90907	0.0633848	0.0317855	0.0379863	0.0428205	0.647421	5
ENSG00000138131	LOXL4	lysyl oxidase-like 4 [Source:HGNC Symbol;Acc:17171]	protein_coding	75.7616	226.597	99.2987	107.551	235.29	9.36151	8.8859	6.35828	4.06033	1.77027	5
ENSG00000138449	SLC40A1	solute carrier family 40 (iron-regulated transporter), member 1 [Source:HGNC Symbol;Acc:10909]	protein_coding	2.31595	12.6356	1.04859	1.7451	5.92858	3.38278	2.10485	2.05475	4.25851	5.19514	5
ENSG00000138650	PCDH10	protocadherin 10 [Source:HGNC Symbol;Acc:13404]	protein_coding	0.098888	0.192572	7.96604	11.1352	5.2469	0.394522	0.296207	0.327653	0.110523	0.229004	5
ENSG00000138772	ANXA3	annexin A3 [Source:HGNC Symbol;Acc:541]	protein_coding	1.07701	2.56522	3.4084	3.7898	5.69252	3.70087	2.96776	2.51747	2.32649	1.58106	5
ENSG00000138821	SLC39A8	solute carrier family 39 (zinc transporter), member 8 [Source:HGNC Symbol;Acc:20862]	protein_coding	0.425088	3.62256	2.66873	3.71979	6.62051	0.0407237	0.0526095	0.0429228	0.046359	0.348706	5
ENSG00000138829	FBN2	fibrillin 2 [Source:HGNC Symbol;Acc:3604]	protein_coding	5.6354	26.1024	191.543	234.361	42.3985	28.1782	37.5266	42.3052	59.22	12.5781	5
ENSG00000139055	ERP27	endoplasmic reticulum protein 27 [Source:HGNC Symbol;Acc:26495]	protein_coding	0.00801147	0.141651	0.0427189	0.0884995	1.87217	0.00842898	0.00284256	0.00805108	0.00346494	0.131666	5
ENSG00000139116	KIF21A	kinesin family member 21A [Source:HGNC Symbol;Acc:19349]	protein_coding	0.151183	0.129064	0.52558	0.566058	0.592945	0.375675	0.335278	0.288693	0.12379	0.106376	5
ENSG00000139211	AMIGO2	adhesion molecule with Ig-like domain 2 [Source:HGNC Symbol;Acc:24073]	protein_coding	5.21036	10.311	77.9003	69.0402	51.8532	1.99344	2.88895	5.89742	3.65808	5.95831	5
ENSG00000139329	LUM	lumican [Source:HGNC Symbol;Acc:6724]	protein_coding	140.762	246.55	345.944	363.941	655.093	48.3562	46.0894	52.8789	60.2334	16.3974	5
ENSG00000139508	SLC46A3	solute carrier family 46, member 3 [Source:HGNC Symbol;Acc:27501]	protein_coding	0.970648	2.48558	3.83951	5.11112	7.18385	0.639815	0.522055	0.510073	1.03318	1.6687	5
ENSG00000139597	N4BP2L1	NEDD4 binding protein 2-like 1 [Source:HGNC Symbol;Acc:25037]	protein_coding	0.173681	0.377575	0.44166	0.51239	0.845469	0.321309	0.196835	0.169007	0.494276	0.806892	5
ENSG00000140030	GPR65	G protein-coupled receptor 65 [Source:HGNC Symbol;Acc:4517]	protein_coding	0	0	0.337021	0.322975	0.749999	0.0552531	0.0940497	0.0737161	0.275044	0.438816	5
ENSG00000140044	JDP2	Jun dimerization protein 2 [Source:HGNC Symbol;Acc:17546]	protein_coding	6.03995	12.285	17.691	17.9798	11.8042	7.79847	4.50715	6.5237	9.11454	3.62529	5
ENSG00000140479	PCSK6	proprotein convertase subtilisin/kexin type 6 [Source:HGNC Symbol;Acc:8569]	protein_coding	0.0731458	0.344019	0.561405	0.680049	1.82982	0.0260646	0.021977	0.0080937	0.0379696	0.257149	5
ENSG00000141338	ABCA8	ATP-binding cassette, sub-family A (ABC1), member 8 [Source:HGNC Symbol;Acc:38]	protein_coding	0.572356	0.844144	0.495747	0.932728	2.89144	0.266303	0.177271	0.073421	0.15188	0.252026	5
ENSG00000141574	SECTM1	secreted and transmembrane 1 [Source:HGNC Symbol;Acc:10707]	protein_coding	15.3092	25.9268	33.9121	37.4756	31.2085	6.15833	5.26253	5.95432	12.0818	10.8928	5
ENSG00000141854	CTB-55O6.8	Uncharacterized protein LOC113230 [Source:UniProtKB/Swiss-Prot;Acc:Q96FF7]	protein_coding	0.289125	0.365629	0.846838	0.650168	0.796888	0.27422	0.25079	0.28406	0.494614	0.800976	5
ENSG00000143028	SYPL2	synaptophysin-like 2 [Source:HGNC Symbol;Acc:27638]	protein_coding	4.36547	27.3084	63.7059	82.6487	78.0427	0.509892	0.50581	0.315451	0.329746	1.8578	5
ENSG00000143320	CRABP2	cellular retinoic acid binding protein 2 [Source:HGNC Symbol;Acc:2339]	protein_coding	107.248	170.385	597.756	371.673	300.152	14.9691	8.72988	5.96944	3.06123	0.824959	5
ENSG00000143387	CTSK	cathepsin K [Source:HGNC Symbol;Acc:2536]	protein_coding	31.7902	50.877	124.754	167.498	636.748	21.1242	14.8202	29.7491	62.1203	127.664	5
ENSG00000144230	GPR17	G protein-coupled receptor 17 [Source:HGNC Symbol;Acc:4471]	protein_coding	0.290173	0.651156	0.685306	0.878643	0.668196	0.117964	0.233467	0.156765	0.113098	0.295361	5
ENSG00000144476	CXCR7	chemokine (C-X-C motif) receptor 7 [Source:HGNC Symbol;Acc:23692]	protein_coding	2.5857	6.55408	25.0555	23.4414	34.2932	0.823753	0.843646	0.318702	3.30761	8.4239	5
ENSG00000144681	STAC	SH3 and cysteine rich domain [Source:HGNC Symbol;Acc:11353]	protein_coding	2.79207	4.13811	2.42118	3.17849	9.78519	0.146692	0.11432	0.0723507	0.0248038	0.0113089	5
ENSG00000144891	AGTR1	angiotensin II receptor, type 1 [Source:HGNC Symbol;Acc:336]	protein_coding	0.00878996	0.0205136	1.16543	0.991263	0.289506	0.481946	0.278994	0.340637	0.357684	0.101573	5
ENSG00000145244	CORIN	corin, serine peptidase [Source:HGNC Symbol;Acc:19012]	protein_coding	0.163429	0.939917	10.9258	17.177	5.16435	1.26785	1.60377	1.69524	0.838715	1.10349	5
ENSG00000145569	FAM105A	family with sequence similarity 105, member A [Source:HGNC Symbol;Acc:25629]	protein_coding	1.04621	0.796283	3.83202	4.89239	7.65884	0.199165	0.124572	0.443896	0.188744	0.21948	5
ENSG00000145730	PAM	peptidylglycine alpha-amidating monooxygenase [Source:HGNC Symbol;Acc:8596]	protein_coding	43.4494	65.1052	48.1444	61.837	169.171	38.7197	40.2086	37.1271	45.5462	93.7181	5
ENSG00000145934	ODZ2	odz, odd Oz/ten-m homolog 2 (Drosophila) [Source:HGNC Symbol;Acc:29943]	protein_coding	0.296992	0.857803	0.746709	0.976492	2.44511	0.0691708	0.0772132	0.0696871	0.0232061	0.11523	5
ENSG00000146233	CYP39A1	cytochrome P450, family 39, subfamily A, polypeptide 1 [Source:HGNC Symbol;Acc:17449]	protein_coding	0.0825096	0.265722	0.752714	1.02346	0.851151	0.098077	0.0899366	0.0672419	0.0783706	0.938392	5
ENSG00000146674	IGFBP3	insulin-like growth factor binding protein 3 [Source:HGNC Symbol;Acc:5472]	protein_coding	43.8456	131.932	547.112	542.013	731.833	16.6276	30.0461	51.2242	33.7734	4.75148	5
ENSG00000147027	TMEM47	transmembrane protein 47 [Source:HGNC Symbol;Acc:18515]	protein_coding	31.8321	57.9477	98.4485	127.153	201.594	23.4816	28.306	26.5517	22.7431	69.6141	5
ENSG00000147852	VLDLR	very low density lipoprotein receptor [Source:HGNC Symbol;Acc:12698]	protein_coding	6.57115	12.7911	11.1256	14.7285	16.6401	5.37426	3.42462	3.87659	5.66437	0.635032	5
ENSG00000148942	SLC5A12	solute carrier family 5 (sodium/glucose cotransporter), member 12 [Source:HGNC Symbol;Acc:28750]	protein_coding	0.00437367	0.0128733	0.0740245	0.0912475	0.0281675	0.00669766	0.0143914	0.00371787	0.0155678	0.0669906	5
ENSG00000149131	SERPING1	serpin peptidase inhibitor, clade G (C1 inhibitor), member 1 [Source:HGNC Symbol;Acc:1228]	protein_coding	38.0092	94.223	108.197	120.511	151.152	8.5113	6.89046	2.56361	1.2086	2.19361	5
ENSG00000149968	MMP3	matrix metallopeptidase 3 (stromelysin 1, progelatinase) [Source:HGNC Symbol;Acc:7173]	protein_coding	20.4646	3.10731	4.86315	3.07992	47.9107	1.60971	3.18357	0.703856	3.91379	3.5843	5
ENSG00000150051	MKX	mohawk homeobox [Source:HGNC Symbol;Acc:23729]	protein_coding	9.09599	18.9242	49.3568	56.9904	50.4136	0.474172	0.259743	0.236141	0.31935	0.0199016	5
ENSG00000150907	FOXO1	forkhead box O1 [Source:HGNC Symbol;Acc:3819]	protein_coding	0.650709	1.19763	2.01593	2.9312	2.76511	0.01702	0.0218306	0.0288668	0.0291011	0.0955839	5
ENSG00000151062	CACNA2D4	calcium channel, voltage-dependent, alpha 2/delta subunit 4 [Source:HGNC Symbol;Acc:20202]	protein_coding	0.0495637	0.0705218	0.145141	0.197077	0.188946	0.0625555	0.0517518	0.0214107	0.0208596	0.00597406	5
ENSG00000151090	THRB	thyroid hormone receptor, beta [Source:HGNC Symbol;Acc:11799]	protein_coding	0.449121	0.966668	0.396948	0.58767	0.863208	0.0170941	0.0172626	0.0340261	0.0605289	0.544835	5
ENSG00000151117	TMEM86A	transmembrane protein 86A [Source:HGNC Symbol;Acc:26890]	protein_coding	0.465207	0.798947	0.411829	0.582104	1.00719	0.222134	0.255273	0.205306	0.379043	0.921242	5
ENSG00000151320	AKAP6	A kinase (PRKA) anchor protein 6 [Source:HGNC Symbol;Acc:376]	protein_coding	0.117875	0.352901	6.6134	7.36189	7.43921	0.221908	0.217981	0.196425	0.435384	1.42126	5
ENSG00000151632	AKR1C2	aldo-keto reductase family 1, member C2 (dihydrodiol dehydrogenase 2; bile acid binding protein; 3-alpha hydroxysteroid dehydrogenase, type III) [Source:HGNC Symbol;Acc:385]	protein_coding	1.3611	1.96967	0.560928	0.512636	4.02408	1.70142	1.25313	1.11414	2.74314	1.26286	5
ENSG00000152268	SPON1	spondin 1, extracellular matrix protein [Source:HGNC Symbol;Acc:11252]	processed_transcript	2.58403	2.90167	0.943054	1.29035	2.86984	0.749935	0.585276	0.533431	0.341882	0.809006	5
ENSG00000152580	IGSF10	immunoglobulin superfamily, member 10 [Source:HGNC Symbol;Acc:26384]	protein_coding	0.174592	0.455283	0.14689	0.228915	0.313716	0.0318953	0.0192504	0.0149274	0.010804	0.0477409	5
ENSG00000152763	WDR78	WD repeat domain 78 [Source:HGNC Symbol;Acc:26252]	protein_coding	0.37317	0.624758	0.703095	0.906997	0.970231	0.39267	0.328	0.33971	0.616393	1.13722	5
ENSG00000152939	MARVELD2	MARVEL domain containing 2 [Source:HGNC Symbol;Acc:26401]	protein_coding	0.556966	0.611152	0.993969	1.28549	1.42752	0.609076	0.514861	0.647844	0.980456	0.375738	5
ENSG00000153291	SLC25A27	solute carrier family 25, member 27 [Source:HGNC Symbol;Acc:21065]	protein_coding	1.26698	2.92814	5.98704	7.00175	4.73461	0.945071	0.692541	0.728507	1.41479	3.61839	5
ENSG00000153707	PTPRD	protein tyrosine phosphatase, receptor type, D [Source:HGNC Symbol;Acc:9668]	protein_coding	0.0141401	0.0430034	2.71978	3.19382	1.36939	0.0727599	0.0366253	0.00457241	0.00491406	0.000936581	5
ENSG00000153993	SEMA3D	sema domain, immunoglobulin domain (Ig), short basic domain, secreted, (semaphorin) 3D [Source:HGNC Symbol;Acc:10726]	protein_coding	2.31336	2.38098	10.4246	16.1758	8.73138	1.21847	1.33383	2.46083	2.08976	0.521287	5
ENSG00000154122	ANKH	ankylosis, progressive homolog (mouse) [Source:HGNC Symbol;Acc:15492]	protein_coding	3.08159	5.11291	8.09013	9.29694	9.71043	2.61413	2.76026	3.08265	3.8358	5.7789	5
ENSG00000154175	ABI3BP	ABI family, member 3 (NESH) binding protein [Source:HGNC Symbol;Acc:17265]	protein_coding	0.828883	0.909872	0.46427	0.475724	1.35821	0.467084	0.282511	0.636301	0.26219	0.0460774	5
ENSG00000154265	ABCA5	ATP-binding cassette, sub-family A (ABC1), member 5 [Source:HGNC Symbol;Acc:35]	protein_coding	2.16677	4.23476	7.64497	9.8198	7.43833	0.580277	0.328521	0.384514	0.798399	0.497511	5
ENSG00000154330	PGM5	phosphoglucomutase 5 [Source:HGNC Symbol;Acc:8908]	protein_coding	3.55289	4.04042	5.95653	6.94574	14.1084	0.576585	0.583256	0.239131	0.154789	0.25511	5
ENSG00000154736	ADAMTS5	ADAM metallopeptidase with thrombospondin type 1 motif, 5 [Source:HGNC Symbol;Acc:221]	protein_coding	1.87208	5.80133	19.8222	29.3165	40.766	1.51726	1.70048	2.81175	6.40263	7.1977	5
ENSG00000154856	APCDD1	adenomatosis polyposis coli down-regulated 1 [Source:HGNC Symbol;Acc:15718]	protein_coding	20.6278	23.0365	29.4546	34.1342	50.3617	0.956762	1.45025	3.27475	1.71743	0.215345	5
ENSG00000154917	RAB6B	RAB6B, member RAS oncogene family [Source:HGNC Symbol;Acc:14902]	protein_coding	0.598171	0.94162	0.55289	0.675245	2.87173	0.558599	0.519867	0.466383	0.420493	1.95365	5
ENSG00000155016	CYP2U1	cytochrome P450, family 2, subfamily U, polypeptide 1 [Source:HGNC Symbol;Acc:20582]	protein_coding	4.68739	7.55451	8.63913	10.9277	14.8322	3.76766	3.77913	3.33518	4.66298	8.95532	5
ENSG00000155130	MARCKS	myristoylated alanine-rich protein kinase C substrate [Source:HGNC Symbol;Acc:6759]	protein_coding	61.0187	60.5043	133.614	101.068	94.1902	38.2965	33.0795	41.097	36.2969	15.9089	5
ENSG00000155511	GRIA1	glutamate receptor, ionotropic, AMPA 1 [Source:HGNC Symbol;Acc:4571]	protein_coding	0.907899	2.64994	7.12201	7.08528	11.9832	1.20969	0.911407	0.36846	0.121453	0.0381211	5
ENSG00000156042	TTC18	tetratricopeptide repeat domain 18 [Source:HGNC Symbol;Acc:30726]	protein_coding	0.19386	0.228617	0.155225	0.280953	0.585724	0.0867316	0.0563787	0.0582915	0.0728937	0.340528	5
ENSG00000156140	ADAMTS3	ADAM metallopeptidase with thrombospondin type 1 motif, 3 [Source:HGNC Symbol;Acc:219]	protein_coding	0.398861	0.610173	0.34191	0.567497	1.74709	0.461534	0.446879	0.584503	0.272856	0.348285	5
ENSG00000156804	FBXO32	F-box protein 32 [Source:HGNC Symbol;Acc:16731]	protein_coding	1.13284	2.26526	1.57352	1.87878	3.78449	1.15234	0.501175	0.405686	1.19884	3.49196	5
ENSG00000157214	STEAP2	STEAP family member 2, metalloreductase [Source:HGNC Symbol;Acc:17885]	protein_coding	2.54136	3.44954	1.1697	1.91287	3.45182	0.367738	0.248472	0.268561	0.199092	0.110682	5
ENSG00000157766	ACAN	aggrecan [Source:HGNC Symbol;Acc:319]	protein_coding	0.900728	2.98568	14.4864	12.6278	23.6574	0.220254	0.145491	0.0634403	0.0151762	0.017172	5
ENSG00000158008	EXTL1	exostoses (multiple)-like 1 [Source:HGNC Symbol;Acc:3515]	protein_coding	1.98109	3.32996	2.861	3.30273	4.87972	0.575791	0.763449	0.524022	0.203193	1.81625	5
ENSG00000158258	CLSTN2	calsyntenin 2 [Source:HGNC Symbol;Acc:17448]	protein_coding	0.0550529	0.944892	0.209467	0.376851	7.81962	0.0210406	0.0166567	0.0272155	0.0082713	1.24871	5
ENSG00000158270	COLEC12	collectin sub-family member 12 [Source:HGNC Symbol;Acc:16016]	protein_coding	38.1428	83.9826	155.29	173.973	164.599	7.48732	4.57405	2.31148	1.45704	0.694633	5
ENSG00000158373	HIST1H2BD	histone cluster 1, H2bd [Source:HGNC Symbol;Acc:4747]	protein_coding	3.23072	6.03618	10.3015	10.7142	14.2926	3.1058	3.08607	3.03407	3.38381	11.5335	5
ENSG00000158406	HIST1H4H	histone cluster 1, H4h [Source:HGNC Symbol;Acc:4788]	protein_coding	1.13131	2.23789	4.15795	6.13966	13.4229	1.14383	1.3475	0.918976	1.39987	5.74433	5
ENSG00000158560	DYNC1I1	dynein, cytoplasmic 1, intermediate chain 1 [Source:HGNC Symbol;Acc:2963]	protein_coding	0.0174625	0.0138933	0.0243647	0.0307345	1.10553	0.0157026	0.0184118	0.00244445	0.00371944	0.0819728	5
ENSG00000158769	F11R	F11 receptor [Source:HGNC Symbol;Acc:14685]	protein_coding	0.342291	0.735136	0.370157	0.563147	3.20777	0.26462	0.232614	0.231676	0.177059	0.440189	5
ENSG00000158825	CDA	cytidine deaminase [Source:HGNC Symbol;Acc:1712]	protein_coding	5.08132	8.06244	11.0923	10.5089	11.0881	1.42274	1.23176	0.649584	0.169698	0.107035	5
ENSG00000159388	BTG2	BTG family, member 2 [Source:HGNC Symbol;Acc:1131]	protein_coding	9.14725	12.8002	22.3168	31.8828	18.6745	14.7812	7.30835	6.57159	10.1448	13.3085	5
ENSG00000159403	C1R	complement component 1, r subcomponent [Source:HGNC Symbol;Acc:1246]	protein_coding	32.7898	72.7188	84.4501	81.7507	95.0338	42.7073	36.5143	40.7818	67.8385	27.4936	5
ENSG00000159455	LCE2B	late cornified envelope 2B [Source:HGNC Symbol;Acc:16610]	protein_coding	0	0.0132716	0.015667	0.0202983	4.8788	0.0164112	0.135819	0.134224	0.0327907	2.00778	5
ENSG00000159640	ACE	angiotensin I converting enzyme (peptidyl-dipeptidase A) 1 [Source:HGNC Symbol;Acc:2707]	protein_coding	1.2753	2.41082	4.7755	5.39628	6.44732	0.865752	0.767258	0.661971	0.770336	1.55547	5
ENSG00000159733	ZFYVE28	zinc finger, FYVE domain containing 28 [Source:HGNC Symbol;Acc:29334]	protein_coding	1.03312	0.937045	2.03325	1.979	1.70663	1.01942	1.05168	1.19602	1.27178	2.07365	5
ENSG00000160111	CPAMD8	C3 and PZP-like, alpha-2-macroglobulin domain containing 8 [Source:HGNC Symbol;Acc:23228]	protein_coding	0.0323962	0.0544239	0.0988093	0.075761	0.0999837	0.0388329	0.0218855	0.0279066	0.0560549	0.00658938	5
ENSG00000160870	CYP3A7	cytochrome P450, family 3, subfamily A, polypeptide 7 [Source:HGNC Symbol;Acc:2640]	protein_coding	0.0383291	0.0743098	0.0234813	0.0636779	0.414335	0.0475897	0.0519748	0.050033	0.0396187	0.178226	5
ENSG00000161249	DMKN	dermokine [Source:HGNC Symbol;Acc:25063]	protein_coding	0.857802	1.85106	2.67219	3.15408	2.12346	0.251888	0.150555	0.0858074	0.100118	0.0354184	5
ENSG00000161381	PLXDC1	plexin domain containing 1 [Source:HGNC Symbol;Acc:20945]	protein_coding	0.131465	0.249615	0.341525	0.372922	0.546045	0.176144	0.145179	0.0713133	0.0381532	0.0311641	5
ENSG00000162383	SLC1A7	solute carrier family 1 (glutamate transporter), member 7 [Source:HGNC Symbol;Acc:10945]	protein_coding	1.02712	3.81839	3.02344	2.95658	5.29875	0.394376	0.474746	0.545107	1.03664	0.902399	5
ENSG00000162415	ZSWIM5	zinc finger, SWIM-type containing 5 [Source:HGNC Symbol;Acc:29299]	protein_coding	0.175495	0.233523	0.253537	0.307112	1.72889	0.043575	0.0328354	0.0840732	0.0862421	0.285054	5
ENSG00000162433	AK4	adenylate kinase 4 [Source:HGNC Symbol;Acc:363]	protein_coding	7.64609	10.1944	6.51246	6.99657	22.4889	0.487162	0.594111	0.230093	0.192158	0.316824	5
ENSG00000162493	PDPN	podoplanin [Source:HGNC Symbol;Acc:29602]	protein_coding	0.0972539	0.484187	3.00331	3.28386	8.73932	2.6268	2.66256	0.472914	0.969455	0.459454	5
ENSG00000162591	MEGF6	multiple EGF-like-domains 6 [Source:HGNC Symbol;Acc:3232]	protein_coding	9.76834	25.4497	30.6976	37.5795	38.2258	2.34352	2.41527	2.45251	1.53475	0.535511	5
ENSG00000162616	DNAJB4	DnaJ (Hsp40) homolog, subfamily B, member 4 [Source:HGNC Symbol;Acc:14886]	protein_coding	20.7339	28.0541	16.1498	20.2531	50.6589	15.0366	14.8548	13.3603	11.6997	29.1342	5
ENSG00000162654	GBP4	guanylate binding protein 4 [Source:HGNC Symbol;Acc:20480]	protein_coding	0.228079	0.19326	0.509614	0.444844	0.24069	0.113283	0.0432259	0.0883717	0.10589	0.310738	5
ENSG00000162687	KCNT2	potassium channel, subfamily T, member 2 [Source:HGNC Symbol;Acc:18866]	protein_coding	0.0346912	0.195559	1.20774	1.30473	1.62238	0.464009	0.216364	0.505039	0.857645	0.0263027	5
ENSG00000162981	FAM84A	family with sequence similarity 84, member A [Source:HGNC Symbol;Acc:20743]	protein_coding	0.161026	0.556251	0.337379	0.40196	1.44631	0.284044	0.372773	0.328166	0.11936	0.136642	5
ENSG00000163145	C1QTNF7	C1q and tumor necrosis factor related protein 7 [Source:HGNC Symbol;Acc:14342]	protein_coding	0.065471	0.0839624	0.199045	0.286614	0.689519	0.188259	0.178907	0.157862	0.326164	0.241306	5
ENSG00000163453	IGFBP7	insulin-like growth factor binding protein 7 [Source:HGNC Symbol;Acc:5476]	protein_coding	33.4102	47.9059	109.849	100.115	117.939	30.0431	47.9618	65.6232	85.8355	117.947	5
ENSG00000163520	FBLN2	fibulin 2 [Source:HGNC Symbol;Acc:3601]	protein_coding	59.8267	99.0113	85.5092	99.6573	138.33	5.32493	3.81188	2.91113	1.25364	0.277159	5
ENSG00000164093	PITX2	paired-like homeodomain 2 [Source:HGNC Symbol;Acc:9005]	protein_coding	0.0510338	0.0359574	0.969584	0.908033	0.243597	0.157442	0.145109	0.0619381	0.120704	0.0285966	5
ENSG00000164099	PRSS12	protease, serine, 12 (neurotrypsin, motopsin) [Source:HGNC Symbol;Acc:9477]	protein_coding	34.797	40.0294	52.8944	77.4052	87.2813	23.0934	19.0147	20.3596	12.9385	8.66501	5
ENSG00000164107	HAND2	heart and neural crest derivatives expressed 2 [Source:HGNC Symbol;Acc:4808]	protein_coding	0.047045	0.0474087	1.27577	1.28869	1.64437	0.184756	0.129082	0.033502	0.00233433	0.0423017	5
ENSG00000164116	GUCY1A3	guanylate cyclase 1, soluble, alpha 3 [Source:HGNC Symbol;Acc:4685]	protein_coding	0.0533606	0.269176	0.06126	0.065286	0.718176	0.0616589	0.0207558	0.0198966	0.0427206	0.00535491	5
ENSG00000164122	ASB5	ankyrin repeat and SOCS box containing 5 [Source:HGNC Symbol;Acc:17180]	protein_coding	8.025	15.3953	10.8463	15.9511	45.0397	0.202445	0.201834	0.125486	0.146523	0.401718	5
ENSG00000164142	FAM160A1	family with sequence similarity 160, member A1 [Source:HGNC Symbol;Acc:34237]	protein_coding	0.0851194	0.103732	0.0288414	0.0503336	0.265108	0.111994	0.121051	0.128199	0.042241	0.0205762	5
ENSG00000164379	FOXQ1	forkhead box Q1 [Source:HGNC Symbol;Acc:20951]	protein_coding	1.15622	0.460019	5.79535	4.10336	3.64681	2.48916	2.58642	2.18444	4.32534	1.92576	5
ENSG00000164440	TXLNB	taxilin beta [Source:HGNC Symbol;Acc:21617]	protein_coding	0.246976	0.401722	0.0728375	0.151004	0.341454	0.158757	0.0895647	0.0666141	0.201562	0.27444	5
ENSG00000164463	CREBRF	CREB3 regulatory factor [Source:HGNC Symbol;Acc:24050]	protein_coding	2.00626	3.44106	2.8239	4.12844	4.89822	2.62528	1.76108	1.60313	3.47112	4.42785	5
ENSG00000164659	KIAA1324L	KIAA1324-like [Source:HGNC Symbol;Acc:21945]	protein_coding	0.0448459	0.045019	0.0444559	0.0507057	0.948549	0.143119	0.0987674	0.0695424	0.0271947	0.007441	5
ENSG00000164920	OSR2	odd-skipped related 2 (Drosophila) [Source:HGNC Symbol;Acc:15830]	protein_coding	42.5004	65.2977	50.1349	49.7443	110.705	0.654506	0.750297	1.18313	1.2245	2.11358	5
ENSG00000165072	MAMDC2	MAM domain containing 2 [Source:HGNC Symbol;Acc:23673]	protein_coding	5.03677	15.5277	10.9959	16.0156	15.8589	7.94606	7.45302	7.69007	9.2809	16.2654	5
ENSG00000165078	CPA6	carboxypeptidase A6 [Source:HGNC Symbol;Acc:17245]	protein_coding	0.0768128	0.15169	0.0418404	0.0447242	0.404279	0.215017	0.202288	0.127389	0.117488	0.045777	5
ENSG00000165091	TMC1	transmembrane channel-like 1 [Source:HGNC Symbol;Acc:16513]	protein_coding	0.06102	0.128941	0.0837451	0.142183	0.310255	0.0750679	0.0702773	0.0279024	0.0280534	0.127678	5
ENSG00000165202	OR1Q1	olfactory receptor, family 1, subfamily Q, member 1 [Source:HGNC Symbol;Acc:8223]	protein_coding	0.175591	1.35549	0.99015	1.45013	0.854422	0.0559539	0.0618593	0.0835874	0.1584	0.744841	5
ENSG00000165804	ZNF219	zinc finger protein 219 [Source:HGNC Symbol;Acc:13011]	protein_coding	2.8098	6.0277	7.1115	8.74285	13.4379	1.48991	1.74494	1.05145	1.90983	6.47138	5
ENSG00000165929	TC2N	tandem C2 domains, nuclear [Source:HGNC Symbol;Acc:19859]	protein_coding	0.111396	0.215322	0.242945	0.282811	0.269461	0.0230575	0.0224904	0.00774561	0.016509	0.130819	5
ENSG00000166002	C11orf75	chromosome 11 open reading frame 75 [Source:HGNC Symbol;Acc:24810]	protein_coding	2.74794	2.62202	5.8954	4.44356	4.10411	2.31251	2.20619	2.54777	2.97847	0.893453	5
ENSG00000166396	SERPINB7	serpin peptidase inhibitor, clade B (ovalbumin), member 7 [Source:HGNC Symbol;Acc:13902]	protein_coding	6.65733	5.52169	30.6994	21.5005	11.1392	8.439	10.4074	9.35193	3.85068	16.1524	5
ENSG00000166432	ZMAT1	zinc finger, matrin-type 1 [Source:HGNC Symbol;Acc:29377]	protein_coding	0.0489603	0.0715891	0.295423	0.415359	0.631444	0.0225704	0.0254747	0.0205811	0.0147048	0.0723228	5
ENSG00000166471	TMEM41B	transmembrane protein 41B [Source:HGNC Symbol;Acc:28948]	protein_coding	8.49754	9.57036	16.7142	16.5047	20.1476	11.4326	7.81767	7.43261	16.6479	7.04508	5
ENSG00000166473	PKD1L2	polycystic kidney disease 1-like 2 [Source:HGNC Symbol;Acc:21715]	polymorphic_pseudogene	0.352494	1.24826	0.132154	0.203113	1.20533	0.180742	0.158065	0.120486	0.249193	0.199054	5
ENSG00000166689	PLEKHA7	pleckstrin homology domain containing, family A member 7 [Source:HGNC Symbol;Acc:27049]	protein_coding	0.00822761	0.0199931	0.164167	0.298961	0.316128	0.00433969	0.0014674	0.0027111	0.00606363	0.0368619	5
ENSG00000166920	C15orf48	chromosome 15 open reading frame 48 [Source:HGNC Symbol;Acc:29898]	protein_coding	0.556498	0.361312	0.534698	0.45064	1.5201	0.607451	0.551633	0.352164	1.04651	0.514675	5
ENSG00000166922	SCG5	secretogranin V (7B2 protein) [Source:HGNC Symbol;Acc:10816]	protein_coding	3.04337	8.70906	11.3519	11.3646	15.5862	4.76126	3.12894	2.56622	3.26827	1.78941	5
ENSG00000167244	IGF2	insulin-like growth factor 2 (somatomedin A) [Source:HGNC Symbol;Acc:5466]	protein_coding	7.62243	22.8605	13.5808	12.7064	44.4694	10.8709	17.8809	24.799	29.2892	6.3122	5
ENSG00000167641	PPP1R14A	protein phosphatase 1, regulatory (inhibitor) subunit 14A [Source:HGNC Symbol;Acc:14871]	protein_coding	1.4221	2.89805	53.3049	37.5219	35.1027	4.8384	4.38817	2.98407	3.36132	1.5092	5
ENSG00000167972	ABCA3	ATP-binding cassette, sub-family A (ABC1), member 3 [Source:HGNC Symbol;Acc:33]	protein_coding	0.840828	1.56535	1.19127	1.59364	1.96393	0.308579	0.358264	0.230013	0.37298	2.42414	5
ENSG00000168032	ENTPD3	ectonucleoside triphosphate diphosphohydrolase 3 [Source:HGNC Symbol;Acc:3365]	protein_coding	0.0327864	0.116345	0.0169324	0.0268342	0.152803	0.017653	0.0123447	0.025015	0.0278307	0.111727	5
ENSG00000168140	VASN	vasorin [Source:HGNC Symbol;Acc:18517]	protein_coding	57.7586	61.4474	125.333	95.4363	76.2279	41.9731	47.1053	56.4	92.1059	40.5925	5
ENSG00000168477	TNXB	tenascin XB [Source:HGNC Symbol;Acc:11976]	protein_coding	0.331644	1.54938	1.97451	3.24197	16.3797	0.162726	0.0948507	0.0605024	0.262887	0.179206	5
ENSG00000169122	FAM110B	family with sequence similarity 110, member B [Source:HGNC Symbol;Acc:28587]	protein_coding	1.0348	1.83499	4.51903	5.95109	6.19179	0.358367	0.25237	0.158875	0.157685	0.0210365	5
ENSG00000169184	MN1	meningioma (disrupted in balanced translocation) 1 [Source:HGNC Symbol;Acc:7180]	protein_coding	1.48175	1.37465	3.13878	3.20732	2.75718	1.29633	0.764616	0.695876	0.809407	0.160308	5
ENSG00000169255	B3GALNT1	beta-1,3-N-acetylgalactosaminyltransferase 1 (globoside blood group) [Source:HGNC Symbol;Acc:918]	protein_coding	1.93175	1.7464	2.57482	2.65189	4.76589	2.05249	1.95926	1.85245	1.7472	0.936023	5
ENSG00000169271	HSPB3	heat shock 27kDa protein 3 [Source:HGNC Symbol;Acc:5248]	protein_coding	14.7676	23.0677	51.1684	31.4129	27.6769	1.2537	0.77682	0.244123	0.395227	0.403497	5
ENSG00000169439	SDC2	syndecan 2 [Source:HGNC Symbol;Acc:10659]	protein_coding	14.6226	16.3021	34.0001	32.4492	51.4156	12.4657	14.4108	17.9034	22.291	24.9459	5
ENSG00000170214	ADRA1B	adrenoceptor alpha 1B [Source:HGNC Symbol;Acc:278]	protein_coding	0.502078	1.27982	1.27517	1.94336	4.69636	1.81939	1.74182	2.17076	3.18345	0.691952	5
ENSG00000170271	C5orf4	chromosome 5 open reading frame 4 [Source:HGNC Symbol;Acc:1334]	protein_coding	1.90732	3.36901	2.30845	3.57289	6.87526	1.51091	1.19394	0.911877	1.92288	3.98049	5
ENSG00000170477	KRT4	keratin 4 [Source:HGNC Symbol;Acc:6441]	protein_coding	0.0116122	0.0646401	0.381024	0.329865	0.449086	0.0572043	0.0744435	0.174063	0.24987	0.19776	5
ENSG00000170498	KISS1	KiSS-1 metastasis-suppressor [Source:HGNC Symbol;Acc:6341]	protein_coding	3.02936	3.00023	9.68837	6.20058	40.3131	14.5955	26.9487	7.27684	5.44008	6.07323	5
ENSG00000170558	CDH2	cadherin 2, type 1, N-cadherin (neuronal) [Source:HGNC Symbol;Acc:1759]	protein_coding	20.6999	12.7256	8.30534	7.74013	29.4256	7.6605	8.48184	13.1109	9.15606	4.16155	5
ENSG00000170571	EMB	embigin [Source:HGNC Symbol;Acc:30465]	protein_coding	0.0250198	0.0217658	1.16009	1.51685	3.85912	0.42313	0.290625	0.110655	0.0391891	0.0745027	5
ENSG00000170745	KCNS3	potassium voltage-gated channel, delayed-rectifier, subfamily S, member 3 [Source:HGNC Symbol;Acc:6302]	protein_coding	1.38585	2.55857	5.96633	6.47348	10.4525	0.895385	1.14001	1.31281	1.31351	2.26964	5
ENSG00000170962	PDGFD	platelet derived growth factor D [Source:HGNC Symbol;Acc:30620]	protein_coding	0.866071	2.12089	0.845286	1.37816	26.6554	5.51148	4.60698	6.54629	9.86712	0.46594	5
ENSG00000171509	RXFP1	relaxin/insulin-like family peptide receptor 1 [Source:HGNC Symbol;Acc:19718]	protein_coding	0.047579	0.199531	0.338691	0.647856	11.0202	0.00172239	0.00777155	0.010991	0.0117169	0.100663	5
ENSG00000171533	MAP6	microtubule-associated protein 6 [Source:HGNC Symbol;Acc:6868]	protein_coding	2.27939	4.4204	6.37946	7.14435	8.48578	0.648716	0.676503	0.290682	0.146589	0.187755	5
ENSG00000171658	RP11-443P15.2		pseudogene	0.0875154	0.394139	0.586973	0.834082	2.81222	0.387039	0.364523	0.331852	1.01568	0.284902	5
ENSG00000172159	FRMD3	FERM domain containing 3 [Source:HGNC Symbol;Acc:24125]	protein_coding	0.0732836	0.0397688	0.0930623	0.110466	0.516403	0.0112766	0.00542409	0.0243155	0.0258243	0.109464	5
ENSG00000172183	ISG20	interferon stimulated exonuclease gene 20kDa [Source:HGNC Symbol;Acc:6130]	protein_coding	0.136795	0.132286	1.1147	0.956019	0.847577	0.258905	0.18719	0.126389	0.108855	0.0642276	5
ENSG00000172348	RCAN2	regulator of calcineurin 2 [Source:HGNC Symbol;Acc:3041]	protein_coding	7.01653	21.7581	14.5088	18.0698	35.7572	0.56064	0.602141	0.999458	0.659775	4.6673	5
ENSG00000172497	ACOT12	acyl-CoA thioesterase 12 [Source:HGNC Symbol;Acc:24436]	protein_coding	0.121335	0.157635	0.0792477	0.130159	0.648236	0.364384	0.207408	0.237487	0.488085	0.163773	5
ENSG00000172915	NBEA	neurobeachin [Source:HGNC Symbol;Acc:7648]	protein_coding	3.51311	4.62129	6.25032	8.01231	7.89465	0.653645	0.563099	0.470505	0.31907	0.667569	5
ENSG00000173535	TNFRSF10C	tumor necrosis factor receptor superfamily, member 10c, decoy without an intracellular domain [Source:HGNC Symbol;Acc:11906]	protein_coding	3.0947	5.16027	1.17878	2.34374	4.89219	1.33355	1.33026	1.1438	0.709845	0.367341	5
ENSG00000173641	HSPB7	heat shock 27kDa protein family, member 7 (cardiovascular) [Source:HGNC Symbol;Acc:5249]	protein_coding	3.94023	5.34964	17.4841	20.2856	41.1131	2.5778	2.80027	1.91046	2.31516	7.71699	5
ENSG00000173727	AP000769.1	Uncharacterized protein [Source:UniProtKB/TrEMBL;Acc:I3L084]	protein_coding	2.98392	3.02852	1.6208	1.56183	3.99803	1.4759	1.19657	1.21199	0.816569	2.38334	5
ENSG00000173762	CD7	CD7 molecule [Source:HGNC Symbol;Acc:1695]	protein_coding	0.265688	0.437817	0.647745	0.596159	0.841439	0.0712584	0.043017	0.0350846	0.285827	0.518464	5
ENSG00000173947	C1orf88	chromosome 1 open reading frame 88 [Source:HGNC Symbol;Acc:27009]	protein_coding	0.14346	0.366478	0.466572	0.499913	1.08898	0.0450207	0.0329473	0.0271238	0.079304	0.194312	5
ENSG00000174348	PODN	podocan [Source:HGNC Symbol;Acc:23174]	protein_coding	25.5609	75.6512	70.1852	90.1222	120.624	9.39871	10.3642	9.93624	20.8661	25.9639	5
ENSG00000174564	IL20RB	interleukin 20 receptor beta [Source:HGNC Symbol;Acc:6004]	protein_coding	0.364968	0.582371	1.54838	1.2945	2.09017	0.769983	0.458172	0.57746	0.984571	0.394308	5
ENSG00000174899	C3orf55	chromosome 3 open reading frame 55 [Source:HGNC Symbol;Acc:25146]	protein_coding	1.34886	2.0609	1.74318	1.72996	2.92104	0.859585	0.681936	0.515288	0.398081	0.12972	5
ENSG00000175155	YPEL2	yippee-like 2 (Drosophila) [Source:HGNC Symbol;Acc:18326]	protein_coding	1.91339	3.26124	2.31367	3.15229	6.07248	1.70415	1.38153	1.10281	2.05327	3.72639	5
ENSG00000175463	TBC1D10C	TBC1 domain family, member 10C [Source:HGNC Symbol;Acc:24702]	protein_coding	0.075675	0.246045	0.182201	0.433536	0.419135	0.0926256	0.106783	0.0892113	0.141715	0.374035	5
ENSG00000176595	KBTBD11	kelch repeat and BTB (POZ) domain containing 11 [Source:HGNC Symbol;Acc:29104]	protein_coding	0.150322	0.263993	2.04843	2.43188	0.762186	0.130371	0.0865199	0.0361097	0.0417082	0.156215	5
ENSG00000176658	MYO1D	myosin ID [Source:HGNC Symbol;Acc:7598]	protein_coding	16.1452	28.2342	38.2744	42.4437	45.7847	0.523714	0.408612	0.170204	0.125675	0.45827	5
ENSG00000176927	EFCAB5	EF-hand calcium binding domain 5 [Source:HGNC Symbol;Acc:24801]	protein_coding	0.095445	0.14524	0.067254	0.124556	0.245061	0.0684009	0.0588714	0.082901	0.0599417	0.207398	5
ENSG00000176945	MUC20	mucin 20, cell surface associated [Source:HGNC Symbol;Acc:23282]	protein_coding	0.286533	0.487717	0.58062	0.785523	0.818667	0.0887362	0.0634864	0.0728653	0.135788	0.331161	5
ENSG00000177025	C19orf18	chromosome 19 open reading frame 18 [Source:HGNC Symbol;Acc:28642]	protein_coding	0.582428	1.36273	1.38556	1.5567	2.16944	0.374135	0.254079	0.425303	0.661863	1.156	5
ENSG00000177363	LRRN4CL	LRRN4 C-terminal like [Source:HGNC Symbol;Acc:33724]	protein_coding	4.79412	14.2037	20.2204	19.2428	48.4162	11.6759	9.57959	2.9289	2.73085	0.619788	5
ENSG00000177459	C8orf47	chromosome 8 open reading frame 47 [Source:HGNC Symbol;Acc:26823]	protein_coding	1.61189	1.82981	0.846097	0.655282	2.06441	0.897464	0.95098	0.989996	1.13528	0.438972	5
ENSG00000177839	PCDHB9	protocadherin beta 9 [Source:HGNC Symbol;Acc:8694]	pseudogene	0.222625	0.422117	0.319314	0.423301	0.542344	0.133804	0.154612	0.169146	0.223907	0.409273	5
ENSG00000178031	ADAMTSL1	ADAMTS-like 1 [Source:HGNC Symbol;Acc:14632]	protein_coding	2.17601	1.40105	5.90477	7.54086	3.47772	1.11482	1.18316	1.43164	0.455609	0.881241	5
ENSG00000178038	ALS2CL	ALS2 C-terminal like [Source:HGNC Symbol;Acc:20605]	protein_coding	1.57201	3.52014	2.13137	2.63655	2.3694	0.459884	0.569202	0.446906	0.834514	2.97271	5
ENSG00000178301	AQP11	aquaporin 11 [Source:HGNC Symbol;Acc:19940]	protein_coding	0.701623	0.871016	1.17959	1.17106	1.54743	0.973163	0.984998	0.686434	1.5119	0.946604	5
ENSG00000178573	MAF	v-maf musculoaponeurotic fibrosarcoma oncogene homolog (avian) [Source:HGNC Symbol;Acc:6776]	protein_coding	1.51129	2.94904	4.0858	3.50019	3.30807	0.120762	0.112913	0.129692	0.27516	0.456991	5
ENSG00000179163	FUCA1	fucosidase, alpha-L- 1, tissue [Source:HGNC Symbol;Acc:4006]	protein_coding	4.04788	7.35112	6.37114	7.82694	28.5255	1.35605	1.33978	1.68766	2.1913	8.94915	5
ENSG00000179397	C1orf101	chromosome 1 open reading frame 101 [Source:HGNC Symbol;Acc:28491]	protein_coding	0.158554	0.30174	0.370788	0.45261	0.439876	0.108275	0.0626919	0.065111	0.14478	0.261511	5
ENSG00000179528	LBX2	ladybird homeobox 2 [Source:HGNC Symbol;Acc:15525]	protein_coding	0.0396235	0.0926728	0.198693	0.122649	0.201072	0.205967	0.13431	0.105577	0.123429	0.036483	5
ENSG00000179715	PCED1B	PC-esterase domain containing 1B [Source:HGNC Symbol;Acc:28255]	protein_coding	1.01643	1.37034	5.72112	5.90885	4.06105	0.383822	0.523545	0.628231	0.451333	0.921065	5
ENSG00000180113	TDRD6	tudor domain containing 6 [Source:HGNC Symbol;Acc:21339]	protein_coding	0.00582198	0.0640213	0.110023	0.192981	0.116888	0.00678532	0.00408173	0.00526626	0.0141616	0.0815356	5
ENSG00000180233	ZNRF2	zinc and ring finger 2 [Source:HGNC Symbol;Acc:22316]	protein_coding	0.843334	0.785324	2.47297	2.68376	1.79278	0.445344	0.326866	0.410704	0.468838	0.217457	5
ENSG00000180447	GAS1	growth arrest-specific 1 [Source:HGNC Symbol;Acc:4165]	protein_coding	6.72132	15.1047	52.5221	48.299	81.286	1.63207	1.25551	0.796714	0.844341	0.628477	5
ENSG00000180509	KCNE1	potassium voltage-gated channel, Isk-related family, member 1 [Source:HGNC Symbol;Acc:6240]	protein_coding	0.157001	0.115866	0.102375	0.163284	0.639732	0.394449	0.298892	0.273853	0.135581	0.329228	5
ENSG00000180573	HIST1H2AC	histone cluster 1, H2ac [Source:HGNC Symbol;Acc:4733]	protein_coding	10.3145	20.8465	34.8084	37.5883	55.7702	13.3562	12.0618	9.63517	19.6108	46.0193	5
ENSG00000180596	HIST1H2BC	histone cluster 1, H2bc [Source:HGNC Symbol;Acc:4757]	protein_coding	1.14872	1.97876	2.45283	4.15723	5.96182	1.1651	1.99279	1.00926	1.56235	6.10503	5
ENSG00000180875	GREM2	gremlin 2 [Source:HGNC Symbol;Acc:17655]	protein_coding	0.752326	0.428419	0.941014	0.725559	0.970911	0.892451	0.771216	0.821227	0.331002	0.73319	5
ENSG00000181754	AMIGO1	adhesion molecule with Ig-like domain 1 [Source:HGNC Symbol;Acc:20824]	protein_coding	1.51777	2.70495	2.01077	2.84414	6.72329	1.00792	1.14314	0.952901	1.28999	3.95649	5
ENSG00000182022	CHST15	carbohydrate (N-acetylgalactosamine 4-sulfate 6-O) sulfotransferase 15 [Source:HGNC Symbol;Acc:18137]	protein_coding	1.00572	2.51624	2.67306	2.78043	3.46279	0.0730581	0.0664582	0.00632745	0.0051792	0.00963481	5
ENSG00000182107	TMEM30B	transmembrane protein 30B [Source:HGNC Symbol;Acc:27254]	protein_coding	0.368689	0.31005	0.623279	0.673454	1.41955	0.234085	0.224147	0.196777	0.201672	0.013862	5
ENSG00000182217	HIST2H4B	histone cluster 2, H4b [Source:HGNC Symbol;Acc:29607]	protein_coding	1.22035	2.636	3.37861	3.27261	4.89357	1.29677	1.11245	0.712733	1.56339	3.1391	5
ENSG00000182463	TSHZ2	teashirt zinc finger homeobox 2 [Source:HGNC Symbol;Acc:13010]	protein_coding	0.0157944	0.0352378	0.0307278	0.0289121	0.0645451	0.0400057	0.0249536	0.0117356	0.00864862	0.00496064	5
ENSG00000182580	EPHB3	EPH receptor B3 [Source:HGNC Symbol;Acc:3394]	protein_coding	0.536671	0.765005	1.78741	1.62347	2.13204	1.39875	1.06247	0.923254	1.5197	0.346858	5
ENSG00000182700	IGIP	IgA-inducing protein homolog (Bos taurus) [Source:HGNC Symbol;Acc:33847]	protein_coding	2.10231	4.3506	5.97322	7.15215	13.9467	1.95131	2.16247	1.72385	3.40186	5.04307	5
ENSG00000183160	TMEM119	transmembrane protein 119 [Source:HGNC Symbol;Acc:27884]	protein_coding	34.2626	37.8162	87.2989	88.9368	97.1932	28.3423	19.9347	10.0343	8.32108	3.65507	5
ENSG00000183346	C10orf107	chromosome 10 open reading frame 107 [Source:HGNC Symbol;Acc:28678]	protein_coding	0.42033	0.547646	0.949986	1.06876	3.30967	0.190199	0.131798	0.212871	1.01268	0.269337	5
ENSG00000183558	HIST2H2AA3	histone cluster 2, H2aa3 [Source:HGNC Symbol;Acc:4736]	protein_coding	5.21962	7.87079	12.9817	10.9689	10.8355	4.20171	3.74771	2.52859	3.80478	8.72427	5
ENSG00000183668	PSG9	pregnancy specific beta-1-glycoprotein 9 [Source:HGNC Symbol;Acc:9526]	protein_coding	3.46747	4.41312	4.90356	5.80893	10.6069	1.4003	1.58357	1.38223	1.89074	3.80056	5
ENSG00000183770	FOXL2	forkhead box L2 [Source:HGNC Symbol;Acc:1092]	protein_coding	0.326347	0.418555	4.2057	3.93062	5.43528	0.0766671	0.0357266	0.0923533	0.163701	0.332429	5
ENSG00000183775	KCTD16	potassium channel tetramerisation domain containing 16 [Source:HGNC Symbol;Acc:29244]	protein_coding	0.148768	0.377753	0.455004	0.633577	1.88985	0.204655	0.236895	0.343672	0.481488	0.467377	5
ENSG00000183801	OLFML1	olfactomedin-like 1 [Source:HGNC Symbol;Acc:24473]	protein_coding	0.988929	0.942535	0.698001	0.892016	2.83307	0.573861	0.47842	0.196375	0.0461212	0.00918539	5
ENSG00000183941	HIST2H4A	histone cluster 2, H4a [Source:HGNC Symbol;Acc:4794]	protein_coding	1.27535	2.48758	3.49395	3.56442	5.1972	1.23998	1.14824	1.06753	1.56944	3.05857	5
ENSG00000184226	PCDH9	protocadherin 9 [Source:HGNC Symbol;Acc:8661]	protein_coding	0.691087	0.758791	1.08802	1.43823	2.14992	0.624549	0.778077	1.00633	0.991448	1.35466	5
ENSG00000184254	ALDH1A3	aldehyde dehydrogenase 1 family, member A3 [Source:HGNC Symbol;Acc:409]	protein_coding	0.301052	0.354094	0.200784	0.226459	0.795076	0.481468	0.274766	0.246589	0.153656	0.0195436	5
ENSG00000184916	JAG2	jagged 2 [Source:HGNC Symbol;Acc:6189]	protein_coding	0.122895	0.258303	0.268952	0.25719	0.343416	0.132383	0.16512	0.113067	0.209275	0.336238	5
ENSG00000184985	SORCS2	sortilin-related VPS10 domain containing receptor 2 [Source:HGNC Symbol;Acc:16698]	protein_coding	0.073702	0.0800354	0.701137	1.16807	1.64523	0.265827	0.302186	0.282454	0.113575	0.129504	5
ENSG00000185008	ROBO2	roundabout, axon guidance receptor, homolog 2 (Drosophila) [Source:HGNC Symbol;Acc:10250]	protein_coding	0.0373186	0.0936869	3.86072	6.02762	5.7029	0.252773	0.275917	0.408881	0.445663	0.731667	5
ENSG00000185070	FLRT2	fibronectin leucine rich transmembrane protein 2 [Source:HGNC Symbol;Acc:3761]	protein_coding	2.79703	4.75559	7.2912	10.7009	8.73801	2.3349	1.72772	2.83633	3.93907	1.83284	5
ENSG00000185090	MANEAL	mannosidase, endo-alpha-like [Source:HGNC Symbol;Acc:26452]	protein_coding	0.167527	0.188249	0.683276	0.826935	1.62782	0.156989	0.221488	0.208687	0.2816	0.429467	5
ENSG00000185522	C11orf35	chromosome 11 open reading frame 35 [Source:HGNC Symbol;Acc:28561]	protein_coding	0.394144	0.499711	0.826122	0.782556	0.901124	0.161226	0.119169	0.225674	0.304527	0.438743	5
ENSG00000186297	GABRA5	gamma-aminobutyric acid (GABA) A receptor, alpha 5 [Source:HGNC Symbol;Acc:4079]	protein_coding	0.00667694	0.0145742	0.785764	0.693987	0.297615	0.265383	0.269059	0.169256	0.109079	0.00513704	5
ENSG00000186310	NAP1L3	nucleosome assembly protein 1-like 3 [Source:HGNC Symbol;Acc:7639]	protein_coding	0.812253	0.578331	1.58663	1.34628	3.59516	0.407331	0.38131	0.259844	0.0846707	0.05549	5
ENSG00000186340	THBS2	thrombospondin 2 [Source:HGNC Symbol;Acc:11786]	protein_coding	108.341	159.669	262.907	313.164	240.229	7.195	6.13699	4.3741	3.26562	1.34515	5
ENSG00000187123	LYPD6	LY6/PLAUR domain containing 6 [Source:HGNC Symbol;Acc:28751]	protein_coding	0.907773	0.863363	5.93396	7.26781	2.56503	0.720906	0.645425	0.911828	0.462574	0.214448	5
ENSG00000187134	AKR1C1	aldo-keto reductase family 1, member C1 (dihydrodiol dehydrogenase 1; 20-alpha (3-alpha)-hydroxysteroid dehydrogenase) [Source:HGNC Symbol;Acc:384]	protein_coding	1.35998	2.24831	0.766662	0.809031	7.88622	3.22293	2.25867	1.73232	4.86405	2.16389	5
ENSG00000187372	PCDHB13	protocadherin beta 13 [Source:HGNC Symbol;Acc:8684]	protein_coding	0.427999	0.803008	1.24667	1.65359	1.93875	0.281164	0.357116	0.400262	0.418936	0.850935	5
ENSG00000187479	C11orf96	chromosome 11 open reading frame 96 [Source:HGNC Symbol;Acc:38675]	protein_coding	0.448348	0.469305	6.02979	5.62867	1.57582	2.08189	0.428377	0.0118195	0.206434	1.40917	5
ENSG00000187758	ADH1A	alcohol dehydrogenase 1A (class I), alpha polypeptide [Source:HGNC Symbol;Acc:249]	protein_coding	0.0458926	0.337341	0.367447	0.640162	0.881107	0.153139	0.0796426	0.0692153	0.0959476	0.00904816	5
ENSG00000187837	HIST1H1C	histone cluster 1, H1c [Source:HGNC Symbol;Acc:4716]	protein_coding	14.0496	17.4384	45.1312	40.8847	83.5826	8.92232	10.1095	7.04001	10.7383	19.611	5
ENSG00000188126	MYO15B	myosin XVB pseudogene [Source:HGNC Symbol;Acc:14083]	protein_coding	0.244337	0.274773	0.39301	0.516133	0.553682	0.256858	0.115619	0.105199	0.173083	0.0985781	5
ENSG00000188783	PRELP	proline/arginine-rich end leucine-rich repeat protein [Source:HGNC Symbol;Acc:9357]	protein_coding	1.21032	6.66419	36.762	49.6658	107.19	0.678534	0.43241	0.219169	0.208897	0.99397	5
ENSG00000189058	APOD	apolipoprotein D [Source:HGNC Symbol;Acc:612]	protein_coding	4.475	17.2868	8.83376	12.0409	84.5143	0.0419568	0.0241571	0.0216417	0.0504719	0.267138	5
ENSG00000189129	PLAC9	placenta-specific 9 [Source:HGNC Symbol;Acc:19255]	protein_coding	4.57917	5.30909	13.2725	8.03866	8.30026	4.7191	3.57379	5.15532	4.63214	1.62799	5
ENSG00000196139	AKR1C3	aldo-keto reductase family 1, member C3 (3-alpha hydroxysteroid dehydrogenase, type II) [Source:HGNC Symbol;Acc:386]	protein_coding	0.87358	1.45128	0.572095	0.586698	2.55836	0.848048	0.466917	0.544723	0.935536	0.407076	5
ENSG00000196154	S100A4	S100 calcium binding protein A4 [Source:HGNC Symbol;Acc:10494]	protein_coding	372.691	367.382	800.328	413.275	746.217	42.3559	33.6155	18.3954	16.4605	10.986	5
ENSG00000196159	FAT4	FAT tumor suppressor homolog 4 (Drosophila) [Source:HGNC Symbol;Acc:23109]	protein_coding	3.6058	4.85531	6.12087	8.18037	7.60512	3.54291	4.18393	5.68684	4.53242	7.36409	5
ENSG00000196220	SRGAP3	SLIT-ROBO Rho GTPase activating protein 3 [Source:HGNC Symbol;Acc:19744]	protein_coding	0.0570388	0.0628073	0.0695914	0.0829083	0.148546	0.0325263	0.0232283	0.028954	0.0426437	0.108117	5
ENSG00000196352	CD55	CD55 molecule, decay accelerating factor for complement (Cromer blood group) [Source:HGNC Symbol;Acc:2665]	protein_coding	6.39768	9.61363	18.2618	17.3367	15.6147	12.0139	9.63963	9.18301	18.7184	9.29146	5
ENSG00000196549	MME	membrane metallo-endopeptidase [Source:HGNC Symbol;Acc:7154]	protein_coding	29.8813	70.9703	96.5912	126.757	157.394	10.7919	8.17864	3.59083	4.4324	8.90527	5
ENSG00000196562	SULF2	sulfatase 2 [Source:HGNC Symbol;Acc:20392]	protein_coding	3.87963	11.2917	7.65652	10.0255	11.397	0.453462	0.317015	0.38557	0.224336	0.857488	5
ENSG00000196569	LAMA2	laminin, alpha 2 [Source:HGNC Symbol;Acc:6482]	protein_coding	6.87221	11.6116	20.2443	31.1807	12.9139	2.90653	2.24141	2.18523	1.50843	0.46664	5
ENSG00000196616	ADH1B	alcohol dehydrogenase 1B (class I), beta polypeptide [Source:HGNC Symbol;Acc:250]	protein_coding	0.0758407	1.69061	2.25576	3.4183	5.78562	1.17378	0.451779	0.302342	0.721499	0.0301182	5
ENSG00000196632	WNK3	WNK lysine deficient protein kinase 3 [Source:HGNC Symbol;Acc:14543]	protein_coding	0.045585	0.0366603	0.0287892	0.0529465	0.386136	0.123316	0.110357	0.0655691	0.0472137	0.0260101	5
ENSG00000196730	DAPK1	death-associated protein kinase 1 [Source:HGNC Symbol;Acc:2674]	protein_coding	4.40693	12.3733	8.93118	13.4419	13.6937	0.0686735	0.0423098	0.0268664	0.0153323	0.072418	5
ENSG00000196787	HIST1H2AG	histone cluster 1, H2ag [Source:HGNC Symbol;Acc:4737]	protein_coding	0.658511	0.868811	0.822225	1.06784	1.44892	0.490005	0.424698	0.528852	0.463489	0.963502	5
ENSG00000196963	PCDHB16	protocadherin beta 16 [Source:HGNC Symbol;Acc:14546]	protein_coding	0.487669	0.711251	0.790557	1.05116	1.35019	0.159603	0.243259	0.34797	0.523552	1.44262	5
ENSG00000196972	LINC00087	long intergenic non-protein coding RNA 87 [Source:HGNC Symbol;Acc:34500]	lincRNA	0.198785	0.399968	1.0772	1.31601	2.65295	0.443416	0.374897	0.454641	0.743013	0.931957	5
ENSG00000197077	KIAA1671	KIAA1671 [Source:HGNC Symbol;Acc:29345]	protein_coding	0.449508	0.55269	0.18202	0.265006	0.68504	0.0374997	0.0315706	0.0173889	0.0361705	0.590538	5
ENSG00000197106	SLC6A17	solute carrier family 6, member 17 [Source:HGNC Symbol;Acc:31399]	protein_coding	0.405996	0.565819	3.19206	5.79762	15.7414	0.0544731	0.0600003	0.0344044	0.0100349	0.136068	5
ENSG00000197461	PDGFA	platelet-derived growth factor alpha polypeptide [Source:HGNC Symbol;Acc:8799]	protein_coding	0.959607	2.25461	7.27573	4.90675	4.48417	1.07636	1.28882	1.93055	3.04812	1.35993	5
ENSG00000197465	GYPE	glycophorin E (MNS blood group) [Source:HGNC Symbol;Acc:4705]	protein_coding	0.560355	0.625722	2.70834	2.70602	2.71774	0.282705	0.277598	0.197625	0.0531852	0.056396	5
ENSG00000197635	DPP4	dipeptidyl-peptidase 4 [Source:HGNC Symbol;Acc:3009]	protein_coding	17.3616	70.1741	41.8828	55.2532	34.9392	23.0062	18.5214	23.1714	31.765	46.2098	5
ENSG00000197757	HOXC6	homeobox C6 [Source:HGNC Symbol;Acc:5128]	protein_coding	0.25336	0.469687	1.49052	1.46239	1.70953	0.439731	0.410512	0.168808	0.0860608	0.0086589	5
ENSG00000197903	HIST1H2BK	histone cluster 1, H2bk [Source:HGNC Symbol;Acc:13954]	protein_coding	19.3568	43.3681	68.7871	57.1325	78.3021	21.4591	22.2829	17.8141	32.0525	84.0095	5
ENSG00000197971	MBP	myelin basic protein [Source:HGNC Symbol;Acc:6925]	protein_coding	1.51285	2.11213	0.74833	1.23968	2.83444	0.444337	0.381397	0.0763617	0.0957288	0.0487007	5
ENSG00000198133	TMEM229B	transmembrane protein 229B [Source:HGNC Symbol;Acc:20130]	protein_coding	0.203486	0.49006	0.123596	0.185208	1.05124	0.0491013	0.0376077	0.041709	0.042249	0.285491	5
ENSG00000198353	HOXC4	homeobox C4 [Source:HGNC Symbol;Acc:5126]	protein_coding	0.0647787	0.22436	1.0957	0.95727	0.992551	0.224814	0.198846	0.0823056	0.0369289	0.0113308	5
ENSG00000198624	CCDC69	coiled-coil domain containing 69 [Source:HGNC Symbol;Acc:24487]	protein_coding	0.709734	1.14234	2.15987	3.33342	6.37911	0.674458	0.528502	0.459589	0.443695	1.52287	5
ENSG00000198695	MT-ND6	mitochondrially encoded NADH dehydrogenase 6 [Source:HGNC Symbol;Acc:7462]	protein_coding	1187.36	1394	1412.27	1824.85	3316.55	1254	1138.07	1046.45	1438.33	2921.2	5
ENSG00000198910	L1CAM	L1 cell adhesion molecule [Source:HGNC Symbol;Acc:6470]	protein_coding	7.77144	24.1132	19.482	33.9055	129.682	0.571825	0.590275	0.817452	0.67707	2.24227	5
ENSG00000198939	ZFP2	zinc finger protein 2 homolog (mouse) [Source:HGNC Symbol;Acc:26138]	protein_coding	0.273334	0.386902	0.356752	0.453901	0.833608	0.197557	0.133418	0.154108	0.170176	0.420279	5
ENSG00000198948	MFAP3L	microfibrillar-associated protein 3-like [Source:HGNC Symbol;Acc:29083]	protein_coding	0.394585	0.474908	0.654485	0.849841	1.20223	0.0338024	0.0253713	0.0225939	0.0476514	0.218491	5
ENSG00000203618	GP1BB	glycoprotein Ib (platelet), beta polypeptide [Source:HGNC Symbol;Acc:4440]	protein_coding	0.211495	0.23281	0.456796	0.407533	0.467115	0.331341	0.226671	0.205165	0.651145	0.198323	5
ENSG00000203780	FANK1	fibronectin type III and ankyrin repeat domains 1 [Source:HGNC Symbol;Acc:23527]	protein_coding	0.364805	0.428336	0.588133	0.583667	1.32947	0.304407	0.236932	0.201606	0.337562	0.792741	5
ENSG00000203812	HIST2H2AA4	histone cluster 2, H2aa4 [Source:HGNC Symbol;Acc:29668]	protein_coding	7.97903	12.0992	20.7728	18.1707	17.4433	6.49583	6.01194	3.53449	5.35471	13.8825	5
ENSG00000203849	AL583842.6		processed_transcript	0.188353	0.212461	0.101389	0.145858	1.31473	0.0171857	0.0321954	0.0340625	0.0449279	0.760467	5
ENSG00000204291	COL15A1	collagen, type XV, alpha 1 [Source:HGNC Symbol;Acc:2192]	protein_coding	5.64754	21.6125	52.7932	54.8212	47.3863	28.0027	24.078	21.0551	46.1694	3.71321	5
ENSG00000204642	HLA-F	major histocompatibility complex, class I, F [Source:HGNC Symbol;Acc:4963]	protein_coding	0.551598	1.28572	1.6508	1.48609	0.987773	0.470956	0.561141	0.61328	0.983033	0.992181	5
ENSG00000204936	CD177	CD177 molecule [Source:HGNC Symbol;Acc:30072]	protein_coding	0.380511	0.601423	0.527502	0.752949	2.16439	0.0774506	0.0561843	0.0310296	0.0834917	0.321502	5
ENSG00000205269	TMEM170B	transmembrane protein 170B [Source:HGNC Symbol;Acc:34244]	protein_coding	0.36634	0.631146	1.29351	1.73665	1.97074	0.483928	0.422718	0.382545	0.617939	1.13406	5
ENSG00000205363	C15orf59	chromosome 15 open reading frame 59 [Source:HGNC Symbol;Acc:33753]	protein_coding	0.92798	2.68337	8.63176	9.80536	16.7362	0.274371	0.205155	0.192437	0.147494	0.717964	5
ENSG00000205795	CYS1	cystin 1 [Source:HGNC Symbol;Acc:18525]	protein_coding	0.571066	0.89008	3.5966	3.54303	3.56182	0.280892	0.28202	0.307215	0.584558	0.773284	5
ENSG00000206262	C3orf72	chromosome 3 open reading frame 72 [Source:HGNC Symbol;Acc:34428]	protein_coding	0.192051	0.550702	2.05425	3.09493	4.25746	0.0747929	0.0736	0.0831843	0.170533	0.476733	5
ENSG00000206561	COLQ	collagen-like tail subunit (single strand of homotrimer) of asymmetric acetylcholinesterase [Source:HGNC Symbol;Acc:2226]	protein_coding	0.33029	0.586789	0.541463	0.819296	2.52324	0.351509	0.222529	0.271197	0.31459	0.6959	5
ENSG00000214269	LGMNP1	legumain pseudogene 1 [Source:HGNC Symbol;Acc:23079]	pseudogene	0.360605	0.629692	0.651576	0.842796	0.865827	0.183858	0.166485	0.188254	0.328332	0.578598	5
ENSG00000214402	LCNL1	lipocalin-like 1 [Source:HGNC Symbol;Acc:34436]	protein_coding	0.144511	0.877508	1.63306	1.87229	0.953773	0.788599	0.442404	0.416714	2.32867	0.52876	5
ENSG00000214575	CPEB1	cytoplasmic polyadenylation element binding protein 1 [Source:HGNC Symbol;Acc:21744]	protein_coding	0.231269	0.249427	0.166141	0.260455	0.78179	0.419712	0.279716	0.261523	0.262382	0.167917	5
ENSG00000216331	HIST1H1PS1	histone cluster 1, H1, pseudogene 1 [Source:HGNC Symbol;Acc:19163]	pseudogene	0.240754	0.335507	0.427633	1.05255	1.4611	0.0950752	0.402615	0.330231	0.122417	1.339	5
ENSG00000219607	PPP1R3G	protein phosphatase 1, regulatory subunit 3G [Source:HGNC Symbol;Acc:14945]	protein_coding	0.63665	0.650534	0.845178	0.814297	1.95714	0.695372	0.538576	0.531177	1.08785	1.34311	5
ENSG00000223361	FTH1P10	ferritin, heavy polypeptide 1 pseudogene 10 [Source:HGNC Symbol;Acc:3980]	pseudogene	32.3788	60.5145	220.424	136.794	185.943	68.4226	56.669	55.7335	106.74	46.4672	5
ENSG00000223947	AC016738.4		antisense	0.21067	0.195148	0.124865	0.261912	0.657496	0.239309	0.146757	0.154195	0.181742	0.0826677	5
ENSG00000224596	RP11-202P11.1		lincRNA	0.266602	0.33168	1.06659	0.787261	0.472407	0.310037	0.324617	0.234185	0.50506	0.523208	5
ENSG00000225415	RP3-509I19.1		pseudogene	13.7829	16.3606	14.6394	20.5708	86.8679	0.263089	0.253189	0.225438	0.280092	0.86309	5
ENSG00000226711	FAM66C	family with sequence similarity 66, member C [Source:HGNC Symbol;Acc:21644]	antisense	0.724319	1.34944	1.66149	1.82118	1.76212	1.00826	0.824626	0.710891	1.65581	1.08329	5
ENSG00000227120	AC009238.7		pseudogene	1.36912	0.815804	0.329198	0.354053	4.76281	0.841639	1.01219	0.972012	1.02156	2.57178	5
ENSG00000228486	AC017099.3		processed_transcript	0.588706	0.769194	0.62552	0.955164	1.30671	0.583476	0.572003	0.461264	0.555446	1.24631	5
ENSG00000228495	RP3-523C21.1		lincRNA	0.0261327	0.120552	0.133949	0.251253	1.17998	0.145012	0.13687	0.0660669	0.0826282	0.0418883	5
ENSG00000228914	OR1H1P	olfactory receptor, family 1, subfamily H, member 1 pseudogene [Source:HGNC Symbol;Acc:8206]	pseudogene	0.825008	2.49205	1.5818	2.60762	1.49896	0.155868	0.084297	0.125374	0.23496	2.3226	5
ENSG00000228960	OR2A9P	olfactory receptor, family 2, subfamily A, member 9 pseudogene [Source:HGNC Symbol;Acc:8236]	pseudogene	0.829123	1.4304	1.55323	1.6695	1.70037	0.235233	0.144816	0.123029	0.0515728	0.0405477	5
ENSG00000230529	CEACAMP9	carcinoembryonic antigen-related cell adhesion molecule pseudogene 9 [Source:HGNC Symbol;Acc:1831]	pseudogene	0.237571	0.564414	0.347503	0.594026	2.23391	0.176957	0.0988208	0.109347	0.145523	0.816084	5
ENSG00000230633	RP11-37E23.5		antisense	0.505868	1.48698	2.69807	2.92188	2.85224	1.04085	1.03211	0.847534	1.8091	2.93779	5
ENSG00000230836	AC104135.4		lincRNA	0.544418	0.764818	0.173322	0.247265	1.05754	0.665691	0.489597	0.205394	0.347096	0.209451	5
ENSG00000232368	FTLP2	ferritin, light polypeptide pseudogene 2 [Source:HGNC Symbol;Acc:4001]	pseudogene	17.4967	25.5918	63.9724	60.3483	71.2484	48.716	40.353	40.0836	74.5689	35.5042	5
ENSG00000233029	RP11-439A17.9		lincRNA	0.0108957	0.0589456	0.042705	0.0577398	0.117794	0.0159147	0.00970293	0.019973	0.0460584	0.0871621	5
ENSG00000233899	RP4-742C19.8		processed_transcript	0.724227	1.14139	0.96213	1.69789	1.56672	0.484695	0.507186	0.436704	0.661689	1.18748	5
ENSG00000234156	RP11-64P14.7		processed_transcript	0.471366	1.30126	1.26184	1.01527	1.06633	0.0472932	0.0759351	0.0574895	0.111702	0.691436	5
ENSG00000234289	H2BFS	H2B histone family, member S (pseudogene) [Source:HGNC Symbol;Acc:4762]	pseudogene	4.59079	9.50977	11.8837	11.124	14.0944	5.12704	4.33538	3.91224	6.39354	17.9999	5
ENSG00000235510	BX842568.1		pseudogene	3.58292	7.26886	7.76314	10.5731	15.6741	2.22494	3.31663	3.0078	2.19328	7.71423	5
ENSG00000235545	RP11-230B22.1		antisense	0.167301	0.397161	0.553945	0.880692	0.701831	0.0962206	0.180386	0.273388	0.227973	0.448319	5
ENSG00000235563	RP11-334A14.8		antisense	0.267748	0.59565	0.744193	0.553793	1.0818	0.192975	0.172584	0.264347	0.345301	0.461701	5
ENSG00000235649	MXRA5P1	matrix-remodelling associated 5 pseudogene 1 [Source:HGNC Symbol;Acc:23932]	pseudogene	0.941129	1.75664	2.13589	3.65622	5.59187	0.338982	0.250061	0.420477	0.159353	0.166617	5
ENSG00000235770	LINC00607	long intergenic non-protein coding RNA 607 [Source:HGNC Symbol;Acc:43944]	processed_transcript	0.0580858	0.126293	0.180378	0.199108	0.214539	0.0873582	0.076235	0.0688642	0.211276	0.14615	5
ENSG00000235863	B3GALT4	UDP-Gal:betaGlcNAc beta 1,3-galactosyltransferase, polypeptide 4 [Source:HGNC Symbol;Acc:919]	protein_coding	0.443963	0.919087	2.65277	3.00086	3.87334	0.602615	0.528556	0.595963	1.02986	1.37944	5
ENSG00000236123	CEACAMP11	carcinoembryonic antigen-related cell adhesion molecule pseudogene 11 [Source:HGNC Symbol;Acc:1823]	pseudogene	0.405538	0.788528	0.538564	0.829272	2.19815	0.289901	0.174358	0.0627159	0.250635	1.01167	5
ENSG00000237803	LINC00211	long intergenic non-protein coding RNA 211 [Source:HGNC Symbol;Acc:37459]	lincRNA	0.1762	0.229551	0.457606	0.374974	0.498194	0.149854	0.168748	0.165444	0.159102	0.372263	5
ENSG00000238078	RP11-295M18.2		lincRNA	0.379962	0.745472	0.663155	0.949091	1.05615	0.278268	0.260676	0.287071	0.524606	0.858104	5
ENSG00000239887	C1orf226	chromosome 1 open reading frame 226 [Source:HGNC Symbol;Acc:34351]	protein_coding	1.51014	1.48797	0.442304	0.892781	1.68191	0.0767278	0.0679153	0.103985	0.12709	0.57196	5
ENSG00000240583	AQP1	aquaporin 1 (Colton blood group) [Source:HGNC Symbol;Acc:633]	protein_coding	0.310017	0.435785	0.524676	0.666482	2.63472	1.85822	1.77633	0.871443	0.504777	1.12378	5
ENSG00000240694	PNMA2	paraneoplastic Ma antigen 2 [Source:HGNC Symbol;Acc:9159]	protein_coding	3.30603	4.53787	1.15912	1.16881	5.2269	0.372978	0.405215	0.201748	0.358153	3.6747	5
ENSG00000241104	CEACAMP10	carcinoembryonic antigen-related cell adhesion molecule pseudogene 10 [Source:HGNC Symbol;Acc:1822]	pseudogene	0.797598	2.33032	2.51249	2.97632	9.46842	0.612561	0.46321	0.237774	0.971832	3.61391	5
ENSG00000241988				48.081	61.414	89.946	76.4121	133.557	56.2899	46.6037	42.546	60.5588	118.257	5
ENSG00000242759	RP11-280F2.2		lincRNA	0.165811	0.255428	0.3362	0.481673	0.747453	0.0991771	0.119855	0.126968	0.230391	0.276446	5
ENSG00000244219	GS1-259H13.2		processed_transcript	0.201135	0.191572	0.550846	0.323587	1.05462	0.293282	0.228609	0.161582	0.412593	0.645512	5
ENSG00000244242	IFITM10	interferon induced transmembrane protein 10 [Source:HGNC Symbol;Acc:40022]	protein_coding	0.185399	0.319727	0.841921	0.834098	0.907072	0.156376	0.115704	0.178529	0.265456	0.485815	5
ENSG00000244414	CFHR1	complement factor H-related 1 [Source:HGNC Symbol;Acc:4888]	protein_coding	0.127452	0.687981	4.47407	4.68159	9.70549	1.06641	1.05726	1.18573	1.602	0.221076	5
ENSG00000244694	PTCHD4	patched domain containing 4 [Source:HGNC Symbol;Acc:21345]	protein_coding	0.0893768	0.524374	0.734473	1.30426	8.07246	0.627117	0.626576	0.904915	1.55629	5.42247	5
ENSG00000246090	RP11-696N14.1		lincRNA	0.453602	1.1961	1.25977	1.854	1.17894	0.576739	0.410194	0.358931	0.355307	0.23605	5
ENSG00000246273	SBF2-AS1	SBF2 antisense RNA 1 [Source:HGNC Symbol;Acc:27438]	lincRNA	5.21172	17.271	12.5731	10.5964	11.0242	2.88628	3.3391	3.51956	3.6859	1.43647	5
ENSG00000248144	ADH1C	alcohol dehydrogenase 1C (class I), gamma polypeptide [Source:HGNC Symbol;Acc:251]	polymorphic_pseudogene	0.0577907	0.630402	0.653665	0.954163	1.47295	0.400041	0.106301	0.0817768	0.159959	0.0775125	5
ENSG00000248290	TNXA	tenascin XA (pseudogene) [Source:HGNC Symbol;Acc:11975]	pseudogene	0.245909	1.10267	3.0775	3.48702	21.7029	0.197706	0.0440105	0.043789	0.26352	0.0807736	5
ENSG00000248587	GDNF-AS1	GDNF antisense RNA 1 [Source:HGNC Symbol;Acc:43592]	lincRNA	0.468099	1.00721	0.900194	1.21524	1.00055	0.443729	0.32202	0.275106	0.646186	1.22536	5
ENSG00000249087	C1orf213	chromosome 1 open reading frame 213 [Source:HGNC Symbol;Acc:25122]	protein_coding	0.716948	1.18109	0.618362	0.910322	1.66833	0.446892	0.568165	0.637927	1.14344	0.994756	5
ENSG00000249119	MTND6P4	MT-ND6 pseudogene 4 [Source:HGNC Symbol;Acc:39467]	pseudogene	98.7717	106.805	117.54	147.575	266.868	99.7619	91.3299	82.9612	116.27	223.47	5
ENSG00000250742	RP11-834C11.4		lincRNA	1.05745	2.69119	12.6107	10.949	12.9992	0.366171	0.210134	0.104934	0.0641742	0.0814222	5
ENSG00000250802	ZBED3-AS1	ZBED3 antisense RNA 1 [Source:HGNC Symbol;Acc:44188]	processed_transcript	0.0510376	0.0835549	0.0413914	0.035874	0.179496	0.0912058	0.0432755	0.0248673	0.0540485	0.0117514	5
ENSG00000253159	PCDHGA12	protocadherin gamma subfamily A, 12 [Source:HGNC Symbol;Acc:8699]	protein_coding	3.57873	3.6026	4.3485	5.98491	8.28156	2.69542	2.37794	1.79589	1.18026	0.919723	5
ENSG00000253305	PCDHGB6	protocadherin gamma subfamily B, 6 [Source:HGNC Symbol;Acc:8713]	protein_coding	0.558053	0.612303	1.13484	1.63388	1.88786	0.727786	0.705944	0.666628	0.318607	0.417724	5
ENSG00000254122	PCDHGB7	protocadherin gamma subfamily B, 7 [Source:HGNC Symbol;Acc:8714]	protein_coding	1.41927	1.83684	2.91167	4.07059	4.207	4.008	3.73676	2.54324	1.26877	1.47876	5
ENSG00000254818	RP11-529A4.4		pseudogene	0.0937861	0.0596529	0.0311835	0.0403444	0.336489	0.0564896	0.0682676	0.0762007	0.0751348	0.199945	5
ENSG00000255346	NOX5	NADPH oxidase, EF-hand calcium binding domain 5 [Source:HGNC Symbol;Acc:14874]	protein_coding	0.079353	0.0368323	0.220948	0.446934	0.419247	0.0741014	0.0472445	0.0726592	0.034035	0.120672	5
ENSG00000256043	CTSO	cathepsin O [Source:HGNC Symbol;Acc:2542]	protein_coding	6.02518	12.3524	11.8789	15.0711	17.0575	5.01544	4.7297	5.11307	10.5653	10.7934	5
ENSG00000256612	AC008537.2	CYP2B protein; Cytochrome P450 2B7 short isoform; Uncharacterized protein [Source:UniProtKB/TrEMBL;Acc:Q14097]	protein_coding	0.0780306	0.155084	0.2885	0.502021	0.537502	0.0743307	0.0483626	0.0799743	0.123258	0.459771	5
ENSG00000257410	RP11-2H8.2		processed_transcript	0.258998	0.338281	0.607216	0.587406	1.08702	0.347066	0.373228	0.271363	0.256539	0.986678	5
ENSG00000259091	LINC00517	long intergenic non-protein coding RNA 517 [Source:HGNC Symbol;Acc:19831]	processed_transcript	0.730201	0.313194	0.456258	0.553167	1.53009	0.00257009	0.00447309	0.00617738	0.00267054	0.0503077	5
ENSG00000259207	ITGB3	integrin, beta 3 (platelet glycoprotein IIIa, antigen CD61) [Source:HGNC Symbol;Acc:6156]	protein_coding	2.0355	2.63477	2.9146	3.9392	8.23562	1.98542	2.6537	3.77454	2.40213	5.3375	5
ENSG00000259345	RP11-624L4.1		processed_transcript	0.515593	0.582058	1.15589	1.06257	1.97324	0.441541	0.444079	0.408912	0.498544	0.986222	5
ENSG00000259583	RP11-66B24.4		antisense	0.179059	0.357894	0.413756	0.520626	0.745245	0.133108	0.118759	0.0940371	0.0439779	0.00875788	5
ENSG00000259787	CTB-85P21.2		sense_overlapping	0.0775222	0.163574	0.1985	0.453883	1.77748	0.0892731	0.0893846	0.0855646	0.208541	0.238723	5
ENSG00000260077	RP11-254F7.2		lincRNA	0.839008	1.20745	2.62741	3.30215	2.96625	0.458883	0.407918	0.401664	0.73802	1.06078	5
ENSG00000260257	RP5-1085F17.3		lincRNA	0.465559	0.375314	3.10618	1.15059	1.34161	0.978529	0.68122	0.6848	0.955003	0.362475	5
ENSG00000260400	RP11-119F7.5		sense_overlapping	0.461004	0.563684	1.20928	1.20948	2.09154	0.652389	0.427144	0.403464	0.505748	0.29212	5
ENSG00000260461	RP11-541N10.3		sense_overlapping	0.26481	0.608455	0.584092	0.69762	2.07929	0.364923	0.316417	0.312837	0.506141	0.895581	5
ENSG00000260916	CCPG1	cell cycle progression 1 [Source:HGNC Symbol;Acc:24227]	protein_coding	0.796017	1.65173	3.87594	4.52045	6.85316	1.33379	1.3472	1.13202	3.3016	2.8616	5
ENSG00000261115	TMEM178B	transmembrane protein 178B [Source:HGNC Symbol;Acc:44112]	protein_coding	0.0732972	0.591922	1.13569	2.19201	8.65492	0.0487985	0.0716524	0.080728	0.219734	5.9621	5
ENSG00000261179	RP11-13L2.4		sense_overlapping	0.0144375	0.411787	0.141256	0.225118	9.34102	0.00171089	0.00447802	0.00298642	0.0014768	0.797273	5
ENSG00000261295	RP11-524D16__A.3		antisense	2.17912	3.0436	1.24083	1.90666	8.13702	2.86543	2.5664	2.31878	2.36478	5.44392	5
ENSG00000261324	RP11-174G6.5		sense_overlapping	0.373961	0.640956	0.607977	1.01198	1.15845	0.587997	0.555836	0.438747	0.31374	0.65918	5

## Sheet: Gene list
Cluster1	Cluster2	Cluster3	Cluster4	Cluster5		Cluster1	Cluster2	Cluster3	Cluster4	Cluster5
ENSG00000008118	ENSG00000005379	ENSG00000001461	ENSG00000000460	ENSG00000000971		CAMK1G	BZRAP1	NIPAL3	C1orf112	CFH
ENSG00000008513	ENSG00000006757	ENSG00000002745	ENSG00000003096	ENSG00000001561		ST3GAL1	PNPLA4	WNT16	KLHL13	ENPP4
ENSG00000008517	ENSG00000013619	ENSG00000002933	ENSG00000004777	ENSG00000002746		IL32	MAMLD1	TMEM176A	ARHGAP33	HECW1
ENSG00000013293	ENSG00000023171	ENSG00000004799	ENSG00000005059	ENSG00000006210		SLC7A14	GRAMD1B	PDK4	CCDC109B	CX3CL1
ENSG00000017483	ENSG00000049192	ENSG00000005884	ENSG00000006016	ENSG00000006747		SLC38A5	ADAMTS6	ITGA3	CRLF1	SCIN
ENSG00000018625	ENSG00000055813	ENSG00000028277	ENSG00000006634	ENSG00000007933		ATP1A2	CCDC85A	POU2F2	DBF4	FMO3
ENSG00000019549	ENSG00000058668	ENSG00000030582	ENSG00000007968	ENSG00000008735		SNAI2	ATP2B4	GRN	E2F2	MAPK8IP2
ENSG00000021645	ENSG00000060718	ENSG00000041353	ENSG00000010292	ENSG00000010030		NRXN3	COL11A1	RAB27B	NCAPD2	ETV7
ENSG00000021826	ENSG00000068079	ENSG00000042062	ENSG00000011426	ENSG00000010404		CPS1	IFI35	FAM65C	ANLN	IDS
ENSG00000026559	ENSG00000070159	ENSG00000042832	ENSG00000012048	ENSG00000011347		KCNG1	PTPN3	TG	BRCA1	SYT7
ENSG00000028137	ENSG00000073756	ENSG00000047597	ENSG00000013297	ENSG00000011465		TNFRSF1B	PTGS2	XK	CLDN11	DCN
ENSG00000034510	ENSG00000077420	ENSG00000048392	ENSG00000013810	ENSG00000012171		TMSB10	APBB1IP	RRM2B	TACC3	SEMA3B
ENSG00000037965	ENSG00000080573	ENSG00000050165	ENSG00000014138	ENSG00000025423		HOXC8	COL5A3	DKK3	POLA2	HSD17B6
ENSG00000038427	ENSG00000081041	ENSG00000054392	ENSG00000014257	ENSG00000029534		VCAN	CXCL2	HHAT	ACPP	ANK1
ENSG00000048740	ENSG00000082482	ENSG00000054983	ENSG00000023892	ENSG00000044524		CELF2	KCNK2	GALC	DEF6	EPHA3
ENSG00000054356	ENSG00000090339	ENSG00000058335	ENSG00000024526	ENSG00000047346		PTPRN	ICAM1	RASGRF1	DEPDC1	FAM214A
ENSG00000059728	ENSG00000093072	ENSG00000063854	ENSG00000034063	ENSG00000049540		MXD1	CECR1	HAGH	UHRF1	ELN
ENSG00000064989	ENSG00000095380	ENSG00000064201	ENSG00000035499	ENSG00000053747		CALCRL	NANS	TSPAN32	DEPDC1B	LAMA3
ENSG00000065911	ENSG00000100292	ENSG00000064687	ENSG00000040275	ENSG00000055732		MTHFD2	HMOX1	ABCA7	CCDC99	MCOLN3
ENSG00000067064	ENSG00000101194	ENSG00000064886	ENSG00000041982	ENSG00000057657		IDI1	SLC17A9	CHI3L2	TNC	PRDM1
ENSG00000070669	ENSG00000101210	ENSG00000065325	ENSG00000049541	ENSG00000060140		ASNS	EEF1A2	GLP2R	RFC2	STYK1
ENSG00000073150	ENSG00000101938	ENSG00000067141	ENSG00000051180	ENSG00000061455		PANX2	CHRDL1	NEO1	RAD51	PRDM6
ENSG00000075643	ENSG00000103257	ENSG00000072041	ENSG00000051341	ENSG00000061918		MOCOS	SLC7A5	SLC6A15	POLQ	GUCY1B3
ENSG00000077264	ENSG00000103490	ENSG00000072954	ENSG00000054654	ENSG00000063180		PAK3	PYCARD	TMEM38A	SYNE2	CA11
ENSG00000077943	ENSG00000104381	ENSG00000073849	ENSG00000061337	ENSG00000064309		ITGA8	GDAP1	ST6GAL1	LZTS1	CDON
ENSG00000078053	ENSG00000105048	ENSG00000073910	ENSG00000062524	ENSG00000065717		AMPH	TNNT1	FRY	LTK	TLE2
ENSG00000087086	ENSG00000105373	ENSG00000077585	ENSG00000062822	ENSG00000065923		FTL	GLTSCR2	GPR137B	POLD1	SLC9A7
ENSG00000087842	ENSG00000105640	ENSG00000079841	ENSG00000065328	ENSG00000067715		PIR	RPL18A	RIMS1	MCM10	SYT1
ENSG00000089692	ENSG00000105889	ENSG00000081320	ENSG00000066279	ENSG00000069431		LAG3	STEAP1B	STK17B	ASPM	ABCC9
ENSG00000090006	ENSG00000106003	ENSG00000085465	ENSG00000068489	ENSG00000069667		LTBP4	LFNG	OVGP1	PRR11	RORA
ENSG00000091428	ENSG00000106123	ENSG00000085563	ENSG00000069482	ENSG00000073146		RAPGEF4	EPHB6	ABCB1	GAL	MOV10L1
ENSG00000091490	ENSG00000107562	ENSG00000086696	ENSG00000071539	ENSG00000074527		SEL1L3	CXCL12	HSD17B2	TRIP13	NTN4
ENSG00000091844	ENSG00000107798	ENSG00000090530	ENSG00000072571	ENSG00000076356		RGS17	LIPA	LEPREL1	HMMR	PLXNA2
ENSG00000092421	ENSG00000107968	ENSG00000090920	ENSG00000073111	ENSG00000077942		SEMA6A	MAP3K8	FCGBP	MCM2	FBLN1
ENSG00000092621	ENSG00000108375	ENSG00000092969	ENSG00000075218	ENSG00000078018		PHGDH	RNF43	TGFB2	GTSE1	MAP2
ENSG00000095203	ENSG00000108551	ENSG00000099139	ENSG00000075702	ENSG00000078401		EPB41L4B	RASD1	PCSK5	WDR62	EDN1
ENSG00000099284	ENSG00000108821	ENSG00000099219	ENSG00000076003	ENSG00000078487		H2AFY2	COL1A1	ERMP1	MCM6	ZCWPW1
ENSG00000100889	ENSG00000108947	ENSG00000100100	ENSG00000076382	ENSG00000079215		PCK2	EFNB3	PIK3IP1	SPAG5	SLC1A3
ENSG00000101255	ENSG00000108984	ENSG00000101439	ENSG00000077152	ENSG00000079931		TRIB3	MAP2K6	CST3	UBE2T	MOXD1
ENSG00000101353	ENSG00000110031	ENSG00000101670	ENSG00000077312	ENSG00000080709		C20orf132	LPXN	LIPG	SNRPA	KCNN2
ENSG00000102172	ENSG00000110427	ENSG00000102032	ENSG00000079616	ENSG00000085831		SMS	KIAA1549L	RENBP	KIF22	TTC39A
ENSG00000102886	ENSG00000111981	ENSG00000102057	ENSG00000080839	ENSG00000086619		GDPD3	ULBP1	KCND1	RBL1	ERO1LB
ENSG00000103710	ENSG00000112149	ENSG00000102385	ENSG00000080986	ENSG00000087076		RASL12	CD83	DRP2	NDC80	HSD17B14
ENSG00000104213	ENSG00000113389	ENSG00000102452	ENSG00000082126	ENSG00000087253		PDGFRL	NPR3	NALCN	MPP4	LPCAT2
ENSG00000104321	ENSG00000114315	ENSG00000102996	ENSG00000083807	ENSG00000088367		TRPA1	HES1	MMP15	SLC27A5	EPB41L1
ENSG00000104332	ENSG00000115414	ENSG00000103175	ENSG00000085840	ENSG00000088538		SFRP1	FN1	WFDC1	ORC1	DOCK3
ENSG00000105281	ENSG00000115738	ENSG00000103316	ENSG00000085999	ENSG00000089847		SLC1A5	ID2	CRYM	RAD54L	ANKRD24
ENSG00000105538	ENSG00000116106	ENSG00000103647	ENSG00000087303	ENSG00000091262		RASIP1	EPHA4	CORO2B	NID2	ABCC6
ENSG00000105605	ENSG00000116132	ENSG00000103811	ENSG00000087586	ENSG00000091513		CACNG7	PRRX1	CTSH	AURKA	TF
ENSG00000105855	ENSG00000116741	ENSG00000104043	ENSG00000088325	ENSG00000092758		ITGB8	RGS2	ATP8B4	TPX2	COL9A3
ENSG00000108176	ENSG00000116962	ENSG00000104081	ENSG00000088882	ENSG00000094963		DNAJC12	NID1	BMF	CPXM1	FMO2
ENSG00000111087	ENSG00000117152	ENSG00000104368	ENSG00000089472	ENSG00000096696		GLI1	RGS4	PLAT	HEPH	DSP
ENSG00000112414	ENSG00000117318	ENSG00000104763	ENSG00000089685	ENSG00000099260		GPR126	ID3	ASAH1	BIRC5	PALMD
ENSG00000112936	ENSG00000118263	ENSG00000105696	ENSG00000090447	ENSG00000099785		C7	KLF7	TMEM59L	TFAP4	MARCH2
ENSG00000114854	ENSG00000118515	ENSG00000105767	ENSG00000090889	ENSG00000099869		TNNC1	SGK1	CADM4	KIF4A	IGF2-AS
ENSG00000115604	ENSG00000119508	ENSG00000105825	ENSG00000091651	ENSG00000100167		IL18R1	NR4A3	TFPI2	ORC6	SEPT3
ENSG00000115902	ENSG00000120129	ENSG00000105967	ENSG00000092470	ENSG00000100307		SLC1A4	DUSP1	TFEC	WDR76	CBX7
ENSG00000115963	ENSG00000120738	ENSG00000106351	ENSG00000092853	ENSG00000100626		RND3	EGR1	AGFG2	CLSPN	GALNTL1
ENSG00000117594	ENSG00000120875	ENSG00000106565	ENSG00000093009	ENSG00000101134		HSD11B1	DUSP4	TMEM176B	CDC45	DOK5
ENSG00000118523	ENSG00000121075	ENSG00000106772	ENSG00000094804	ENSG00000101265		CTGF	TBX4	PRUNE2	CDC6	RASSF2
ENSG00000118526	ENSG00000121904	ENSG00000106780	ENSG00000095752	ENSG00000101825		TCF21	CSMD2	MEGF9	IL11	MXRA5
ENSG00000118777	ENSG00000123080	ENSG00000107554	ENSG00000096060	ENSG00000102678		ABCG2	CDKN2C	DNMBP	FKBP5	FGF9
ENSG00000120645	ENSG00000123358	ENSG00000107796	ENSG00000097046	ENSG00000102760		IQSEC3	NR4A1	ACTA2	CDC7	RGCC
ENSG00000121743	ENSG00000124216	ENSG00000108370	ENSG00000100162	ENSG00000102802		GJA3	SNAI1	RGS9	CENPM	C13orf33
ENSG00000122367	ENSG00000124467	ENSG00000108932	ENSG00000100206	ENSG00000103888		LDB3	PSG8	SLC16A6	DMC1	KIAA1199
ENSG00000123689	ENSG00000125538	ENSG00000110092	ENSG00000100285	ENSG00000104324		G0S2	IL1B	CCND1	NEFH	CPQ
ENSG00000124920	ENSG00000125740	ENSG00000110675	ENSG00000100297	ENSG00000104722		C11orf9	FOSB	ELMOD1	MCM5	NEFM
ENSG00000125089	ENSG00000125968	ENSG00000110799	ENSG00000100479	ENSG00000104936		SH3TC1	ID1	VWF	POLE2	DMPK
ENSG00000125384	ENSG00000126353	ENSG00000110900	ENSG00000100526	ENSG00000105088		PTGER2	CCR7	TSPAN11	CDKN3	OLFM2
ENSG00000126016	ENSG00000127124	ENSG00000111348	ENSG00000100629	ENSG00000105246		AMOT	HIVEP3	ARHGDIB	CEP128	EBI3
ENSG00000127951	ENSG00000127311	ENSG00000111728	ENSG00000100749	ENSG00000105499		FGL2	HELB	ST8SIA1	VRK1	PLA2G4C
ENSG00000128045	ENSG00000127528	ENSG00000111859	ENSG00000101003	ENSG00000105784		RASL11B	KLF2	NEDD9	GINS1	RUNDC3B
ENSG00000128228	ENSG00000128165	ENSG00000111879	ENSG00000101057	ENSG00000105989		SDF2L1	ADM2	FAM184A	MYBL2	WNT2
ENSG00000128342	ENSG00000130208	ENSG00000112139	ENSG00000101311	ENSG00000106366		LIF	APOC1	MDGA1	FERMT1	SERPINE1
ENSG00000128590	ENSG00000130707	ENSG00000112378	ENSG00000101412	ENSG00000106538		DNAJB9	ASS1	PERP	E2F1	RARRES2
ENSG00000128602	ENSG00000131979	ENSG00000113070	ENSG00000101447	ENSG00000106688		SMO	GCH1	HBEGF	FAM83D	SLC1A1
ENSG00000128965	ENSG00000132205	ENSG00000113396	ENSG00000101868	ENSG00000106823		CHAC1	EMILIN2	SLC27A6	POLA1	ECM2
ENSG00000129757	ENSG00000133106	ENSG00000113494	ENSG00000102384	ENSG00000107295		CDKN1C	EPSTI1	PRLR	CENPI	SH3GL2
ENSG00000129910	ENSG00000134247	ENSG00000114631	ENSG00000102879	ENSG00000107317		CDH15	PTGFRN	PODXL2	CORO1A	PTGDS
ENSG00000129951	ENSG00000134463	ENSG00000115084	ENSG00000102890	ENSG00000107731		hsa-mir-3187	ECHDC3	SLC35F5	ELMO3	UNC5B
ENSG00000130164	ENSG00000134516	ENSG00000115339	ENSG00000103489	ENSG00000108001		LDLR	DOCK2	GALNT3	XYLT1	EBF3
ENSG00000130303	ENSG00000135074	ENSG00000115756	ENSG00000103995	ENSG00000108602		BST2	ADAM19	HPCAL1	CEP152	ALDH3A1
ENSG00000130513	ENSG00000135424	ENSG00000116005	ENSG00000104147	ENSG00000108691		GDF15	ITGA7	PCYOX1	OIP5	CCL2
ENSG00000130766	ENSG00000136010	ENSG00000116661	ENSG00000104738	ENSG00000110203		SESN2	ALDH1L2	FBXO2	MCM4	FOLR3
ENSG00000130775	ENSG00000136244	ENSG00000116729	ENSG00000104889	ENSG00000110318		THEMIS2	IL6	WLS	RNASEH2A	KIAA1377
ENSG00000132031	ENSG00000136826	ENSG00000119608	ENSG00000105011	ENSG00000110347		MATN3	KLF4	PROX2	ASF1B	MMP12
ENSG00000132329	ENSG00000136938	ENSG00000119655	ENSG00000105202	ENSG00000110436		RAMP1	ANP32B	NPC2	FBL	SLC1A2
ENSG00000132481	ENSG00000136960	ENSG00000119714	ENSG00000105248	ENSG00000111110		TRIM47	ENPP2	GPR68	CCDC94	PPM1H
ENSG00000132639	ENSG00000136997	ENSG00000119900	ENSG00000105486	ENSG00000111341		SNAP25	MYC	OGFRL1	LIG1	MGP
ENSG00000133110	ENSG00000137573	ENSG00000120262	ENSG00000106462	ENSG00000111452		POSTN	SULF1	CCDC170	EZH2	GPR133
ENSG00000134107	ENSG00000137959	ENSG00000120322	ENSG00000109674	ENSG00000111670		BHLHE40	IFI44L	PCDHB8	NEIL3	GNPTAB
ENSG00000134871	ENSG00000138166	ENSG00000120337	ENSG00000109685	ENSG00000111799		COL4A2	DUSP5	TNFSF18	WHSC1	COL12A1
ENSG00000134917	ENSG00000138623	ENSG00000120594	ENSG00000109805	ENSG00000112379		ADAMTS8	SEMA7A	PLXDC2	NCAPG	KIAA1244
ENSG00000135069	ENSG00000139514	ENSG00000123572	ENSG00000111206	ENSG00000112796		PSAT1	SLC7A1	NRK	FOXM1	ENPP5
ENSG00000135750	ENSG00000140403	ENSG00000123700	ENSG00000111247	ENSG00000112837		KCNK1	DNAJA4	KCNJ2	RAD51AP1	TBX18
ENSG00000135842	ENSG00000141052	ENSG00000124882	ENSG00000111331	ENSG00000112902		FAM129A	MYOCD	EREG	OAS3	SEMA5A
ENSG00000136014	ENSG00000142178	ENSG00000125148	ENSG00000111445	ENSG00000112964		USP44	SIK1	MT2A	RFC5	GHR
ENSG00000136490	ENSG00000142632	ENSG00000125398	ENSG00000111602	ENSG00000113083		LIMD2	ARHGEF19	SOX9	TIMELESS	LOX
ENSG00000136943	ENSG00000142937	ENSG00000125510	ENSG00000111665	ENSG00000113369		CTSL2	RPS8	OPRL1	CDCA3	ARRDC3
ENSG00000137331	ENSG00000143322	ENSG00000125848	ENSG00000112029	ENSG00000113578		IER3	ABL2	FLRT3	FBXO5	FGF1
ENSG00000137563	ENSG00000143850	ENSG00000126838	ENSG00000112118	ENSG00000114805		GGH	PLEKHA6	PZP	MCM3	PLCH1
ENSG00000137752	ENSG00000144063	ENSG00000127325	ENSG00000112297	ENSG00000115457		CASP1	MALL	BEST3	AIM1	IGFBP2
ENSG00000138316	ENSG00000144655	ENSG00000127415	ENSG00000112312	ENSG00000116032		ADAMTS14	CSRNP1	IDUA	GMNN	GRIN3B
ENSG00000139269	ENSG00000144802	ENSG00000128510	ENSG00000112742	ENSG00000116183		INHBE	NFKBIZ	CPA4	TTK	PAPPA2
ENSG00000139289	ENSG00000146950	ENSG00000128655	ENSG00000112877	ENSG00000116678		PHLDA1	SHROOM2	PDE11A	CEP72	LEPR
ENSG00000139910	ENSG00000147862	ENSG00000128805	ENSG00000112984	ENSG00000116785		NOVA1	NFIB	ARHGAP22	KIF20A	CFHR3
ENSG00000140105	ENSG00000148803	ENSG00000128872	ENSG00000113368	ENSG00000117266		WARS	FUOM	TMOD2	LMNB1	CDK18
ENSG00000140332	ENSG00000148841	ENSG00000129946	ENSG00000113448	ENSG00000117289		TLE3	ITPRIP	SHC2	PDE4D	TXNIP
ENSG00000140368	ENSG00000149506	ENSG00000130176	ENSG00000113645	ENSG00000117600		PSTPIP1	ZP1	CNN1	WWC1	RP4-788L13.1
ENSG00000140961	ENSG00000149798	ENSG00000130203	ENSG00000113810	ENSG00000118898		OSGIN1	CDC42EP2	APOE	SMC4	PPL
ENSG00000141441	ENSG00000151967	ENSG00000130962	ENSG00000114346	ENSG00000118971		FAM59A	SCHIP1	PRRG1	ECT2	CCND2
ENSG00000144339	ENSG00000153234	ENSG00000132688	ENSG00000115163	ENSG00000119862		TMEFF2	NR4A2	NES	CENPA	LGALSL
ENSG00000144488	ENSG00000154065	ENSG00000133135	ENSG00000117399	ENSG00000119938		ESPNL	ANKRD29	RNF128	CDC20	PPP1R3C
ENSG00000145050	ENSG00000154930	ENSG00000133878	ENSG00000117650	ENSG00000119946		MANF	ACSS1	DUSP26	NEK2	CNNM1
ENSG00000145242	ENSG00000155090	ENSG00000134243	ENSG00000117724	ENSG00000120324		EPHA5	KLF10	SORT1	CENPF	PCDHB10
ENSG00000146267	ENSG00000157734	ENSG00000134369	ENSG00000118193	ENSG00000121361		FAXC	SNX22	NAV1	KIF14	KCNJ8
ENSG00000146555	ENSG00000157927	ENSG00000134376	ENSG00000118407	ENSG00000121753		SDK1	RADIL	CRB1	FILIP1	BAI2
ENSG00000147180	ENSG00000158050	ENSG00000134716	ENSG00000119397	ENSG00000122176		ZNF711	DUSP2	CYP2J2	CNTRL	FMOD
ENSG00000147403	ENSG00000158125	ENSG00000134769	ENSG00000119969	ENSG00000122786		RPL10	XDH	DTNA	HELLS	CALD1
ENSG00000147509	ENSG00000158859	ENSG00000135373	ENSG00000120217	ENSG00000122877		RGS20	ADAMTS4	EHF	CD274	EGR2
ENSG00000149257	ENSG00000159860	ENSG00000135744	ENSG00000120756	ENSG00000122986		SERPINH1	FAM115D	AGT	PLS1	HVCN1
ENSG00000150540	ENSG00000160200	ENSG00000135899	ENSG00000120802	ENSG00000123095		HNMT	CBS	SP110	TMPO	BHLHE41
ENSG00000151012	ENSG00000160886	ENSG00000135951	ENSG00000121152	ENSG00000123612		SLC7A11	LY6K	TSGA10	NCAPH	ACVR1C
ENSG00000151617	ENSG00000160888	ENSG00000136531	ENSG00000121211	ENSG00000124406		EDNRA	IER2	SCN2A	MND1	ATP8A1
ENSG00000152049	ENSG00000162630	ENSG00000136541	ENSG00000121281	ENSG00000124635		KCNE4	B3GALT2	ERMN	ADCY7	HIST1H2BJ
ENSG00000152804	ENSG00000162631	ENSG00000136867	ENSG00000121621	ENSG00000125675		HHEX	NTNG1	SLC31A2	KIF18A	GRIA3
ENSG00000153132	ENSG00000162817	ENSG00000137809	ENSG00000122483	ENSG00000125730		CLGN	C1orf115	ITGA11	CCDC18	C3
ENSG00000153714	ENSG00000162849	ENSG00000137831	ENSG00000122952	ENSG00000126709		LURAP1L	KIF26B	UACA	ZWINT	IFI6
ENSG00000153879	ENSG00000163660	ENSG00000137872	ENSG00000122966	ENSG00000127241		CEBPG	CCNL1	SEMA6D	CIT	MASP1
ENSG00000153885	ENSG00000163739	ENSG00000138411	ENSG00000123213	ENSG00000127990		KCTD15	CXCL1	HECW2	NLN	SGCE
ENSG00000154133	ENSG00000163874	ENSG00000138439	ENSG00000123219	ENSG00000128268		ROBO4	ZC3H12A	FAM117B	CENPK	MGAT3
ENSG00000154277	ENSG00000164241	ENSG00000138669	ENSG00000123416	ENSG00000129009		UCHL1	C5orf63	PRKG2	TUBA1B	ISLR
ENSG00000154545	ENSG00000164330	ENSG00000138798	ENSG00000123473	ENSG00000129048		MAGED4	EBF1	EGF	STIL	CCRL1
ENSG00000154654	ENSG00000164649	ENSG00000139970	ENSG00000123485	ENSG00000130540		NCAM2	CDCA7L	RTN1	HJURP	SULT4A1
ENSG00000156510	ENSG00000165030	ENSG00000139971	ENSG00000123560	ENSG00000130558		HKDC1	NFIL3	C14orf37	PLP1	OLFM1
ENSG00000157150	ENSG00000166106	ENSG00000140563	ENSG00000123610	ENSG00000130751		TIMP4	ADAMTS15	MCTP2	TNFAIP6	NPAS1
ENSG00000157368	ENSG00000166441	ENSG00000141469	ENSG00000123975	ENSG00000130988		IL34	RPL27A	SLC14A1	CKS2	RGN
ENSG00000157399	ENSG00000166825	ENSG00000143127	ENSG00000125247	ENSG00000132640		ARSE	ANPEP	ITGA10	TMTC4	BTBD3
ENSG00000158352	ENSG00000167157	ENSG00000143248	ENSG00000125319	ENSG00000132846		SHROOM4	PRRX2	RGS5	C17orf53	ZBED3
ENSG00000160179	ENSG00000167874	ENSG00000143786	ENSG00000125885	ENSG00000134201		ABCG1	TMEM88	CNIH3	MCM8	GSTM5
ENSG00000160207	ENSG00000168961	ENSG00000144619	ENSG00000126562	ENSG00000134245		HSF2BP	LGALS9	CNTN4	WNK4	WNT2B
ENSG00000160781	ENSG00000169071	ENSG00000144893	ENSG00000126787	ENSG00000134594		PAQR6	ROR2	MED12L	DLGAP5	RAB33A
ENSG00000160867	ENSG00000169594	ENSG00000145506	ENSG00000127423	ENSG00000134602		FGFR4	BNC1	NKD2	AUNIP	MST4
ENSG00000160951	ENSG00000170345	ENSG00000145808	ENSG00000127564	ENSG00000135218		PTGER1	FOS	ADAMTS19	PKMYT1	CD36
ENSG00000161011	ENSG00000170379	ENSG00000146072	ENSG00000127586	ENSG00000135525		SQSTM1	FAM115C	TNFRSF21	CHTF18	MAP7
ENSG00000161544	ENSG00000170500	ENSG00000147041	ENSG00000128050	ENSG00000135604		CYGB	LONRF2	SYTL5	PAICS	STX11
ENSG00000161896	ENSG00000170801	ENSG00000147408	ENSG00000128059	ENSG00000135636		IP6K3	HTRA3	CSGALNACT1	PPAT	DYSF
ENSG00000162407	ENSG00000171223	ENSG00000147642	ENSG00000128285	ENSG00000135914		PPAP2B	JUNB	SYBU	MCHR1	HTR2B
ENSG00000162551	ENSG00000171345	ENSG00000147883	ENSG00000128340	ENSG00000135929		ALPL	KRT19	CDKN2B	RAC2	CYP27A1
ENSG00000162692	ENSG00000173421	ENSG00000148426	ENSG00000128383	ENSG00000136002		VCAM1	CCDC36	C10orf47	APOBEC3A	ARHGEF4
ENSG00000162772	ENSG00000173848	ENSG00000148677	ENSG00000128408	ENSG00000136040		ATF3	NET1	ANKRD1	RIBC2	PLXNC1
ENSG00000162944	ENSG00000174576	ENSG00000148798	ENSG00000129173	ENSG00000136235		RFTN2	NPAS4	INA	E2F8	GPNMB
ENSG00000163703	ENSG00000174640	ENSG00000149201	ENSG00000129195	ENSG00000136367		CRELD1	SLCO2A1	CCDC81	FAM64A	ZFHX2
ENSG00000163734	ENSG00000175084	ENSG00000149596	ENSG00000129534	ENSG00000136869		CXCL3	DES	JPH2	MIS18BP1	TLR4
ENSG00000163814	ENSG00000175356	ENSG00000149948	ENSG00000129810	ENSG00000136928		CDCP1	SCUBE2	HMGA2	SGOL1	GABBR2
ENSG00000164112	ENSG00000176170	ENSG00000150337	ENSG00000130816	ENSG00000137672		TMEM155	SPHK1	FCGR1A	DNMT1	TRPC6
ENSG00000164683	ENSG00000176907	ENSG00000150510	ENSG00000131153	ENSG00000137801		HEY1	C8orf4	FAM124A	GINS2	THBS1
ENSG00000164929	ENSG00000177350	ENSG00000150687	ENSG00000131351	ENSG00000137808		BAALC	RPL13AP3	PRSS23	HAUS8	RP11-809H16.2
ENSG00000165323	ENSG00000177410	ENSG00000151322	ENSG00000131459	ENSG00000137960		FAT3	ZNFX1-AS1	NPAS3	GFPT2	GIPC2
ENSG00000165449	ENSG00000177426	ENSG00000151388	ENSG00000131470	ENSG00000137975		SLC16A9	TGIF1	ADAMTS12	PSMC3IP	CLCA2
ENSG00000165685	ENSG00000178726	ENSG00000151623	ENSG00000131477	ENSG00000138131		TMEM52B	THBD	NR3C2	RAMP2	LOXL4
ENSG00000165868	ENSG00000179094	ENSG00000152127	ENSG00000131747	ENSG00000138449		HSPA12A	PER1	MGAT5	TOP2A	SLC40A1
ENSG00000165997	ENSG00000179294	ENSG00000152154	ENSG00000132436	ENSG00000138650		ARL5B	C17orf96	TMEM178A	FIGNL1	PCDH10
ENSG00000166831	ENSG00000179348	ENSG00000152433	ENSG00000132780	ENSG00000138772		RBPMS2	GATA2	ZNF547	NASP	ANXA3
ENSG00000167771	ENSG00000179388	ENSG00000152689	ENSG00000132967	ENSG00000138821		RCOR2	EGR3	RASGRP3	HMGB1P5	SLC39A8
ENSG00000167889	ENSG00000180353	ENSG00000152785	ENSG00000133119	ENSG00000138829		MGAT5B	HCLS1	BMP3	RFC3	FBN2
ENSG00000167912	ENSG00000182492	ENSG00000152894	ENSG00000134057	ENSG00000139055		RP11-25K19.1	BGN	PTPRK	CCNB1	ERP27
ENSG00000168003	ENSG00000182836	ENSG00000152952	ENSG00000134222	ENSG00000139116		SLC3A2	PLCXD3	PLOD2	PSRC1	KIF21A
ENSG00000168028	ENSG00000183044	ENSG00000153982	ENSG00000134285	ENSG00000139211		RPSA	ABAT	GDPD1	FKBP11	AMIGO2
ENSG00000168077	ENSG00000183807	ENSG00000154639	ENSG00000134690	ENSG00000139329		SCARA3	FAM162B	CXADR	CDCA8	LUM
ENSG00000168209	ENSG00000184307	ENSG00000155011	ENSG00000134802	ENSG00000139508		DDIT4	ZDHHC23	DKK2	SLC43A3	SLC46A3
ENSG00000168685	ENSG00000184588	ENSG00000155962	ENSG00000135451	ENSG00000139597		IL7R	PDE4B	CLIC2	TROAP	N4BP2L1
ENSG00000169174	ENSG00000184635	ENSG00000156011	ENSG00000135476	ENSG00000140030		PCSK9	ZNF93	PSD3	ESPL1	GPR65
ENSG00000169429	ENSG00000184995	ENSG00000156265	ENSG00000135486	ENSG00000140044		IL8	IFNE	C21orf7	HNRNPA1	JDP2
ENSG00000169710	ENSG00000185044	ENSG00000156463	ENSG00000135540	ENSG00000140479		FASN	BX004987.4	SH3RF2	NHSL1	PCSK6
ENSG00000169760	ENSG00000185633	ENSG00000157168	ENSG00000135905	ENSG00000141338		NLGN1	NDUFA4L2	NRG1	DOCK10	ABCA8
ENSG00000169851	ENSG00000185745	ENSG00000157404	ENSG00000136108	ENSG00000141574		PCDH7	IFIT1	KIT	CKAP2	SECTM1
ENSG00000169933	ENSG00000185760	ENSG00000157542	ENSG00000136122	ENSG00000141854		FRMPD4	KCNQ5	KCNJ6	BORA	CTB-55O6.8
ENSG00000169946	ENSG00000187193	ENSG00000157551	ENSG00000136492	ENSG00000143028		ZFPM2	MT1X	KCNJ15	BRIP1	SYPL2
ENSG00000170365	ENSG00000187634	ENSG00000158815	ENSG00000136824	ENSG00000143320		SMAD1	SAMD11	FGF17	SMC2	CRABP2
ENSG00000171208	ENSG00000188158	ENSG00000159167	ENSG00000136982	ENSG00000143387		NETO2	NHS	STC1	DSCC1	CTSK
ENSG00000171388	ENSG00000188396	ENSG00000159348	ENSG00000137310	ENSG00000144230		APLN	TCTEX1D4	CYB5R1	TCF19	GPR17
ENSG00000171724	ENSG00000189343	ENSG00000159674	ENSG00000137404	ENSG00000144476		VAT1L	RPS2P46	SPON2	NRM	CXCR7
ENSG00000171860	ENSG00000197083	ENSG00000160190	ENSG00000137501	ENSG00000144681		C3AR1	ZNF300P1	SLC37A1	SYTL2	STAC
ENSG00000171877	ENSG00000197935	ENSG00000160471	ENSG00000137804	ENSG00000144891		FRMD5	ZNF311	COX6B2	NUSAP1	AGTR1
ENSG00000172201	ENSG00000198028	ENSG00000162643	ENSG00000137807	ENSG00000145244		ID4	ZNF560	WDR63	KIF23	CORIN
ENSG00000172349	ENSG00000198342	ENSG00000162840	ENSG00000137812	ENSG00000145569		IL16	ZNF442	MT1P2	CASC5	FAM105A
ENSG00000173320	ENSG00000198680	ENSG00000163346	ENSG00000137965	ENSG00000145730		STOX2	TUSC1	PBXIP1	IFI44	PAM
ENSG00000173334	ENSG00000198865	ENSG00000163347	ENSG00000138092	ENSG00000145934		TRIB1	CCDC152	CLDN1	CENPO	ODZ2
ENSG00000173894	ENSG00000198929	ENSG00000163376	ENSG00000138160	ENSG00000146233		CBX2	NOS1AP	KBTBD8	KIF11	CYP39A1
ENSG00000174444	ENSG00000198959	ENSG00000163491	ENSG00000138180	ENSG00000146674		RPL4	TGM2	NEK10	CEP55	IGFBP3
ENSG00000174599	ENSG00000203706	ENSG00000163536	ENSG00000138182	ENSG00000147027		TRAM1L1	SERTAD4-AS1	SERPINI1	KIF20B	TMEM47
ENSG00000176046	ENSG00000203805	ENSG00000163590	ENSG00000138346	ENSG00000147852		NUPR1	PPAPDC1A	PPM1L	DNA2	VLDLR
ENSG00000176049	ENSG00000204052	ENSG00000163762	ENSG00000138347	ENSG00000148942		JAKMIP2	LRRC73	TM4SF18	MYPN	SLC5A12
ENSG00000176476	ENSG00000204131	ENSG00000164171	ENSG00000138376	ENSG00000149131		CCDC101	NHSL2	ITGA2	BARD1	SERPING1
ENSG00000176597	ENSG00000204444	ENSG00000164176	ENSG00000138587	ENSG00000149968		B3GNT5	APOM	EDIL3	MNS1	MMP3
ENSG00000176887	ENSG00000205246	ENSG00000164342	ENSG00000138658	ENSG00000150051		SOX11	RPSAP58	TLR3	C4orf21	MKX
ENSG00000177098	ENSG00000205277	ENSG00000165029	ENSG00000138675	ENSG00000150907		SCN4B	MUC12	ABCA1	FGF5	FOXO1
ENSG00000177679	ENSG00000206190	ENSG00000165434	ENSG00000138778	ENSG00000151062		SRRM3	ATP10A	PGM2L1	CENPE	CACNA2D4
ENSG00000177822	ENSG00000206337	ENSG00000165507	ENSG00000139354	ENSG00000151090		AC108142.1	HCP5	C10orf10	GAS2L3	THRB
ENSG00000178464	ENSG00000209582	ENSG00000165617	ENSG00000139618	ENSG00000151117		CTD-2192J16.15	SNORA48	DACT1	BRCA2	TMEM86A
ENSG00000178821	ENSG00000212452	ENSG00000165757	ENSG00000139629	ENSG00000151320		TMEM52	SNORD69	KIAA1462	GALNT6	AKAP6
ENSG00000178860	ENSG00000213442	ENSG00000166349	ENSG00000139734	ENSG00000151632		MSC	RPL18AP3	RAG1	DIAPH3	AKR1C2
ENSG00000179855	ENSG00000213917	ENSG00000166446	ENSG00000139973	ENSG00000152268		GIPC3	AC008279.1	CDYL2	SYT16	SPON1
ENSG00000180139	ENSG00000216775	ENSG00000166510	ENSG00000140525	ENSG00000152580		RP11-399O19.5	RP1-152L7.5	CCDC68	FANCI	IGSF10
ENSG00000180537	ENSG00000216866	ENSG00000167080	ENSG00000140534	ENSG00000152763		RNF182	RPS2P55	B4GALNT2	TICRR	WDR78
ENSG00000181260	ENSG00000220472	ENSG00000167311	ENSG00000140848	ENSG00000152939		RP11-145M9.3	RP11-69L16.5	ART5	CPNE2	MARVELD2
ENSG00000181444	ENSG00000222937	ENSG00000167600	ENSG00000140905	ENSG00000153291		ZNF467	SNORD63	CYP2S1	GCSH	SLC25A27
ENSG00000182199	ENSG00000223865	ENSG00000167740	ENSG00000141994	ENSG00000153707		SHMT2	HLA-DPB1	CYB5D2	DUS3L	PTPRD
ENSG00000182383	ENSG00000223877	ENSG00000167772	ENSG00000142197	ENSG00000153993		CTD-2503O16.2	RP11-2F9.3	ANGPTL4	DOPEY2	SEMA3D
ENSG00000183010	ENSG00000225200	ENSG00000167861	ENSG00000142408	ENSG00000154122		PYCR1	AB019441.29	C17orf28	CACNG8	ANKH
ENSG00000183098	ENSG00000225783	ENSG00000167964	ENSG00000142731	ENSG00000154175		GPC6	MIAT	RAB26	PLK4	ABI3BP
ENSG00000183876	ENSG00000225968	ENSG00000168702	ENSG00000142945	ENSG00000154265		ARSI	ELFN1	LRP1B	KIF2C	ABCA5
ENSG00000185482	ENSG00000227331	ENSG00000169116	ENSG00000143228	ENSG00000154330		STAC3	AC005042.2	PARM1	NUF2	PGM5
ENSG00000185565	ENSG00000228149	ENSG00000169252	ENSG00000143476	ENSG00000154736		LSAMP	RPL3P1	ADRB2	DTL	ADAMTS5
ENSG00000186480	ENSG00000228205	ENSG00000169908	ENSG00000143493	ENSG00000154856		INSIG1	RP11-778D9.4	TM4SF1	INTS7	APCDD1
ENSG00000186854	ENSG00000228649	ENSG00000170458	ENSG00000143799	ENSG00000154917		TRABD2A	AC005682.5	CD14	PARP1	RAB6B
ENSG00000187164	ENSG00000229119	ENSG00000170873	ENSG00000144354	ENSG00000155016		0	0	0	0	0
ENSG00000187498	ENSG00000230629	ENSG00000171246	ENSG00000144355	ENSG00000155130		0	0	0	0	0
ENSG00000187764	ENSG00000230918	ENSG00000171310	ENSG00000144554	ENSG00000155511		0	0	0	0	0
ENSG00000187800	ENSG00000230979	ENSG00000171316	ENSG00000144821	ENSG00000156042		0	0	0	0	0
ENSG00000187840	ENSG00000231389	ENSG00000171385	ENSG00000145386	ENSG00000156140		0	0	0	0	0
ENSG00000187867	ENSG00000231684	ENSG00000171951	ENSG00000145708	ENSG00000156804		0	0	0	0	0
ENSG00000187955	ENSG00000235750	ENSG00000172137	ENSG00000145908	ENSG00000157214		0	0	0	0	0
ENSG00000189184	ENSG00000236552	ENSG00000172399	ENSG00000145911	ENSG00000157766		0	0	0	0	0
ENSG00000196196	ENSG00000236841	ENSG00000172403	ENSG00000146263	ENSG00000158008		0	0	0	0	0
ENSG00000196503	ENSG00000237214	ENSG00000172733	ENSG00000146410	ENSG00000158258		0	0	0	0	0
ENSG00000196517	ENSG00000237424	ENSG00000173114	ENSG00000146670	ENSG00000158270		0	0	0	0	0
ENSG00000196557	ENSG00000237506	ENSG00000173391	ENSG00000146918	ENSG00000158373		0	0	0	0	0
ENSG00000196932	ENSG00000237892	ENSG00000173559	ENSG00000147536	ENSG00000158406		0	0	0	0	0
ENSG00000197147	ENSG00000238273	ENSG00000173826	ENSG00000147573	ENSG00000158560		0	0	0	0	0
ENSG00000197977	ENSG00000239246	ENSG00000174672	ENSG00000148459	ENSG00000158769		0	0	0	0	0
ENSG00000198286	ENSG00000240342	ENSG00000174871	ENSG00000148634	ENSG00000158825		0	0	0	0	0
ENSG00000198768	ENSG00000240376	ENSG00000175899	ENSG00000148773	ENSG00000159388		0	0	0	0	0
ENSG00000198846	ENSG00000242411	ENSG00000176971	ENSG00000149218	ENSG00000159403		0	0	0	0	0
ENSG00000198855	ENSG00000244161	ENSG00000177076	ENSG00000149503	ENSG00000159455		0	0	0	0	0
ENSG00000205336	ENSG00000244300	ENSG00000177409	ENSG00000149548	ENSG00000159640		0	0	0	0	0
ENSG00000213420	ENSG00000244945	ENSG00000180332	ENSG00000149554	ENSG00000159733		0	0	0	0	0
ENSG00000213530	ENSG00000245856	ENSG00000181039	ENSG00000151131	ENSG00000160111		0	0	0	0	0
ENSG00000223609	ENSG00000249669	ENSG00000181072	ENSG00000151364	ENSG00000160870		0	0	0	0	0
ENSG00000224945	ENSG00000250722	ENSG00000182667	ENSG00000151503	ENSG00000161249		0	0	0	0	0
ENSG00000224962	ENSG00000251348	ENSG00000182985	ENSG00000151651	ENSG00000161381		0	0	0	0	0
ENSG00000225067	ENSG00000253864	ENSG00000183111	ENSG00000151725	ENSG00000162383		0	0	0	0	0
ENSG00000226380	ENSG00000253882	ENSG00000183186	ENSG00000152253	ENSG00000162415		0	0	0	0	0
ENSG00000226608	ENSG00000254510	ENSG00000183206	ENSG00000152270	ENSG00000162433		0	0	0	0	0
ENSG00000228499	ENSG00000254667	ENSG00000183378	ENSG00000152936	ENSG00000162493		0	0	0	0	0
ENSG00000229133	ENSG00000255737	ENSG00000183873	ENSG00000153044	ENSG00000162591		0	0	0	0	0
ENSG00000229207	ENSG00000256073	ENSG00000184156	ENSG00000153976	ENSG00000162616		0	0	0	0	0
ENSG00000229638	ENSG00000256671	ENSG00000184408	ENSG00000154146	ENSG00000162654		0	0	0	0	0
ENSG00000230207	ENSG00000256977	ENSG00000184497	ENSG00000154760	ENSG00000162687		0	0	0	0	0
ENSG00000230734	ENSG00000257298	ENSG00000184792	ENSG00000154839	ENSG00000162981		0	0	0	0	0
ENSG00000230787	ENSG00000259790	ENSG00000185437	ENSG00000154920	ENSG00000163145		0	0	0	0	0
ENSG00000233143	ENSG00000259796	ENSG00000185634	ENSG00000155189	ENSG00000163453		0	0	0	0	0
ENSG00000233913	ENSG00000259884	ENSG00000187173	ENSG00000156398	ENSG00000163520		0	0	0	0	0
ENSG00000234741	ENSG00000260727	ENSG00000187583	ENSG00000156509	ENSG00000164093		0	0	0	0	0
ENSG00000234883	ENSG00000261026	ENSG00000187990	ENSG00000156802	ENSG00000164099		0	0	0	0	0
ENSG00000236824	ENSG00000261220	ENSG00000188487	ENSG00000156970	ENSG00000164107		0	0	0	0	0
ENSG00000239268	ENSG00000261490	ENSG00000189221	ENSG00000157456	ENSG00000164116		0	0	0	0	0
ENSG00000241714	ENSG00000261639	ENSG00000196358	ENSG00000158164	ENSG00000164122		0	0	0	0	0
ENSG00000246662	ENSG00000261786	ENSG00000196782	ENSG00000158246	ENSG00000164142		0	0	0	0	0
ENSG00000248498		ENSG00000197142	ENSG00000158402	ENSG00000164379		0		0	0	0
ENSG00000249992		ENSG00000197191	ENSG00000159055	ENSG00000164440		0		0	0	0
ENSG00000250033		ENSG00000197321	ENSG00000159259	ENSG00000164463		0		0	0	0
ENSG00000251470		ENSG00000197409	ENSG00000160298	ENSG00000164659		ASNSP4		HIST1H3D	C21orf58	KIAA1324L
ENSG00000253250		ENSG00000197646	ENSG00000160447	ENSG00000164920		RP11-122A3.2		PDCD1LG2	PKN3	OSR2
ENSG00000253873		ENSG00000197826	ENSG00000160957	ENSG00000165072		PCDHGA11		C4orf22	RECQL4	MAMDC2
ENSG00000258947		ENSG00000197852	ENSG00000161692	ENSG00000165078		TUBB3		FAM212B	DBF4B	CPA6
ENSG00000259250		ENSG00000198208	ENSG00000161800	ENSG00000165091		RP11-50C13.1		RPS6KL1	RACGAP1	TMC1
ENSG00000259811		ENSG00000198786	ENSG00000161888	ENSG00000165202		RP11-863P13.3		MT-ND5	SPC24	OR1Q1
ENSG00000260517		ENSG00000198842	ENSG00000162062	ENSG00000165804		RP11-426C22.5		DUSP27	C16orf59	ZNF219
		ENSG00000198947	ENSG00000162063	ENSG00000165929				DMD	CCNF	TC2N
		ENSG00000203786	ENSG00000162073	ENSG00000166002				KPRP	PAQR4	C11orf75
		ENSG00000203815	ENSG00000162607	ENSG00000166396				AL358813.2	USP1	SERPINB7
		ENSG00000210112	ENSG00000162745	ENSG00000166432				J01415.7	OLFML2B	ZMAT1
		ENSG00000210196	ENSG00000163006	ENSG00000166471				J01415.23	CCDC138	TMEM41B
		ENSG00000211445	ENSG00000163082	ENSG00000166473				GPX3	SGPP2	PKD1L2
		ENSG00000212724	ENSG00000163507	ENSG00000166689				KRTAP2-3	KIAA1524	PLEKHA7
		ENSG00000212725	ENSG00000163535	ENSG00000166920				KRTAP2-1	SGOL2	C15orf48
		ENSG00000213417	ENSG00000163545	ENSG00000166922				KRTAP2-4	NUAK2	SCG5
		ENSG00000214518	ENSG00000163584	ENSG00000167244				KRTAP2-2	RPL22L1	IGF2
		ENSG00000221890	ENSG00000163808	ENSG00000167641				NPTXR	KIF15	PPP1R14A
		ENSG00000222047	ENSG00000163918	ENSG00000167972				C10orf55	RFC4	ABCA3
		ENSG00000223855	ENSG00000164032	ENSG00000168032				AC147651.3	H2AFZ	ENTPD3
		ENSG00000225015	ENSG00000164045	ENSG00000168140				SNX18P15	CDC25A	VASN
		ENSG00000225016	ENSG00000164087	ENSG00000168477				LINC00328-2P	POC1A	TNXB
		ENSG00000225345	ENSG00000164104	ENSG00000169122				SNX18P3	HMGB2	FAM110B
		ENSG00000226067	ENSG00000164109	ENSG00000169184				FAM91A2	MAD2L1	MN1
		ENSG00000227568	ENSG00000164318	ENSG00000169255				SNX18P26	EGFLAM	B3GALNT1
		ENSG00000229373	ENSG00000164611	ENSG00000169271				LINC00452	PTTG1	HSPB3
		ENSG00000229689	ENSG00000164687	ENSG00000169439				AC009237.1	FABP5	SDC2
		ENSG00000230850	ENSG00000165244	ENSG00000170214				BX571672.1	ZNF367	ADRA1B
		ENSG00000230880	ENSG00000165304	ENSG00000170271				AL583842.3	MELK	C5orf4
		ENSG00000232224	ENSG00000165480	ENSG00000170477				LINC00202	SKA3	KRT4
		ENSG00000232274	ENSG00000165490	ENSG00000170498				BX571672.2	C11orf82	KISS1
		ENSG00000232284	ENSG00000166451	ENSG00000170558				GNG12-AS1	CENPN	CDH2
		ENSG00000233005	ENSG00000166508	ENSG00000170571				AC067959.1	MCM7	EMB
		ENSG00000233218	ENSG00000166670	ENSG00000170745				SNX18P16	MMP10	KCNS3
		ENSG00000233308	ENSG00000166803	ENSG00000170962				OSTN-AS1	KIAA0101	PDGFD
		ENSG00000234814	ENSG00000166851	ENSG00000171509				RP11-14C22.4	PLK1	RXFP1
		ENSG00000235501	ENSG00000167325	ENSG00000171533				RP4-639F20.1	RRM1	MAP6
		ENSG00000235999	ENSG00000167513	ENSG00000171658				RP11-403I13.8	CDT1	RP11-443P15.2
		ENSG00000236333	ENSG00000167670	ENSG00000172159				TRHDE-AS1	CHAF1A	FRMD3
		ENSG00000236557	ENSG00000167747	ENSG00000172183				CR381653.1	C19orf48	ISG20
		ENSG00000236914	ENSG00000167900	ENSG00000172348				RP11-1008C21.2	TK1	RCAN2
		ENSG00000238261	ENSG00000168078	ENSG00000172497				BX004987.5	PBK	ACOT12
		ENSG00000240476	ENSG00000168389	ENSG00000172915				CTD-2021J15.2	MFSD2A	NBEA
		ENSG00000241644	ENSG00000168496	ENSG00000173535				INMT	FEN1	TNFRSF10C
		ENSG00000241978	ENSG00000169607	ENSG00000173641				AKAP2	CKAP2L	HSPB7
		ENSG00000243797	ENSG00000169679	ENSG00000173727				CTB-111H14.1	BUB1	AP000769.1
		ENSG00000247157	ENSG00000170006	ENSG00000173762				RP11-434C1.1	TMEM154	CD7
		ENSG00000248433	ENSG00000170312	ENSG00000173947				AL583842.7	CDK1	C1orf88
		ENSG00000248445	ENSG00000170439	ENSG00000174348				CTB-118N6.3	METTL7B	PODN
		ENSG00000248923	ENSG00000170779	ENSG00000174564				MTND5P11	CDCA4	IL20RB
		ENSG00000249242	ENSG00000170961	ENSG00000174899				TMEM150C	HAS2	C3orf55
		ENSG00000250337	ENSG00000171241	ENSG00000175155				RP11-46C20.1	SHCBP1	YPEL2
		ENSG00000251541	ENSG00000171320	ENSG00000175463				RP11-1281K21.5	ESCO2	TBC1D10C
		ENSG00000253537	ENSG00000171848	ENSG00000176595				PCDHGA7	RRM2	KBTBD11
		ENSG00000254300	ENSG00000172296	ENSG00000176658				RP11-706J10.1	SPTLC3	MYO1D
		ENSG00000259606	ENSG00000172716	ENSG00000176927				RP11-316E14.6	SLFN11	EFCAB5
		ENSG00000260359	ENSG00000173207	ENSG00000176945				RP11-4F5.2	CKS1B	MUC20
		ENSG00000260549	ENSG00000174371	ENSG00000177025				MT1L	EXO1	C19orf18
		ENSG00000261326	ENSG00000174442	ENSG00000177363				RP5-1057J7.6	ZWILCH	LRRN4CL
			ENSG00000175063	ENSG00000177459					UBE2C	C8orf47
			ENSG00000175305	ENSG00000177839					CCNE2	PCDHB9
			ENSG00000175592	ENSG00000178031					FOSL1	ADAMTSL1
			ENSG00000175832	ENSG00000178038					ETV4	ALS2CL
			ENSG00000176208	ENSG00000178301					ATAD5	AQP11
			ENSG00000176619	ENSG00000178573					LMNB2	MAF
			ENSG00000176641	ENSG00000179163					RNF152	FUCA1
			ENSG00000176890	ENSG00000179397					TYMS	C1orf101
			ENSG00000176974	ENSG00000179528					SHMT1	LBX2
			ENSG00000177084	ENSG00000179715					POLE	PCED1B
			ENSG00000177602	ENSG00000180113					GSG2	TDRD6
			ENSG00000178295	ENSG00000180233					GEN1	ZNRF2
			ENSG00000178401	ENSG00000180447					DNAJC22	GAS1
			ENSG00000178921	ENSG00000180509					PFAS	KCNE1
			ENSG00000178999	ENSG00000180573					AURKB	HIST1H2AC
			ENSG00000179300	ENSG00000180596					ZCCHC5	HIST1H2BC
			ENSG00000179362	ENSG00000180875					HMGN2P46	GREM2
			ENSG00000179750	ENSG00000181754					APOBEC3B	AMIGO1
			ENSG00000179841	ENSG00000182022					AKAP5	CHST15
			ENSG00000180071	ENSG00000182107					ANKRD18A	TMEM30B
			ENSG00000180198	ENSG00000182217					RCC1	HIST2H4B
			ENSG00000180611	ENSG00000182463					MB21D2	TSHZ2
			ENSG00000181544	ENSG00000182580					FANCB	EPHB3
			ENSG00000181938	ENSG00000182700					GINS3	IGIP
			ENSG00000183763	ENSG00000183160					TRAIP	TMEM119
			ENSG00000183814	ENSG00000183346					LIN9	C10orf107
			ENSG00000183856	ENSG00000183558					IQGAP3	HIST2H2AA3
			ENSG00000183963	ENSG00000183668					SMTN	PSG9
			ENSG00000184445	ENSG00000183770					KNTC1	FOXL2
			ENSG00000184661	ENSG00000183775					CDCA2	KCTD16
			ENSG00000185133	ENSG00000183801					INPP5J	OLFML1
			ENSG00000185480	ENSG00000183941					PARPBP	HIST2H4A
			ENSG00000186185	ENSG00000184226					KIF18B	PCDH9
			ENSG00000186193	ENSG00000184254					SAPCD2	ALDH1A3
			ENSG00000186469	ENSG00000184916					GNG2	JAG2
			ENSG00000186530	ENSG00000184985					XKR5	SORCS2
			ENSG00000186638	ENSG00000185008					KIF24	ROBO2
			ENSG00000186871	ENSG00000185070					ERCC6L	FLRT2
			ENSG00000187514	ENSG00000185090					PTMA	MANEAL
			ENSG00000187741	ENSG00000185522					FANCA	C11orf35
			ENSG00000187951	ENSG00000186297					ARHGAP11B	GABRA5
			ENSG00000188486	ENSG00000186310					H2AFX	NAP1L3
			ENSG00000188610	ENSG00000186340					FAM72B	THBS2
			ENSG00000188985	ENSG00000187123					DHFRP1	LYPD6
			ENSG00000189057	ENSG00000187134					FAM111B	AKR1C1
			ENSG00000196550	ENSG00000187372					FAM72A	PCDHB13
			ENSG00000196584	ENSG00000187479					XRCC2	C11orf96
			ENSG00000197275	ENSG00000187758					RAD54B	ADH1A
			ENSG00000197299	ENSG00000187837					BLM	HIST1H1C
			ENSG00000197301	ENSG00000188126					RP11-366L20.2	MYO15B
			ENSG00000197381	ENSG00000188783					ADARB1	PRELP
			ENSG00000197472	ENSG00000189058					ZNF695	APOD
			ENSG00000197744	ENSG00000189129					PTMAP2	PLAC9
			ENSG00000198056	ENSG00000196139					PRIM1	AKR1C3
			ENSG00000198185	ENSG00000196154					ZNF334	S100A4
			ENSG00000198554	ENSG00000196159					WDHD1	FAT4
			ENSG00000198826	ENSG00000196220					ARHGAP11A	SRGAP3
			ENSG00000198830	ENSG00000196352					HMGN2	CD55
			ENSG00000198885	ENSG00000196549					ITPRIPL1	MME
			ENSG00000198901	ENSG00000196562					PRC1	SULF2
			ENSG00000199753	ENSG00000196569					SNORD104	LAMA2
			ENSG00000200087	ENSG00000196616					SNORA73B	ADH1B
			ENSG00000200534	ENSG00000196632					SNORA33	WNK3
			ENSG00000202031	ENSG00000196730					SNORD38A	DAPK1
			ENSG00000203760	ENSG00000196787					CENPW	HIST1H2AG
			ENSG00000203995	ENSG00000196963					ZYG11A	PCDHB16
			ENSG00000204366	ENSG00000196972					ZBTB12	LINC00087
			ENSG00000205683	ENSG00000197077					DPF3	KIAA1671
			ENSG00000207870	ENSG00000197106					MIR221	SLC6A17
			ENSG00000209482	ENSG00000197461					SNORD83A	PDGFA
			ENSG00000213160	ENSG00000197465					KLHL23	GYPE
			ENSG00000213347	ENSG00000197635					MXD3	DPP4
			ENSG00000214018	ENSG00000197757					RRM2P3	HOXC6
			ENSG00000214182	ENSG00000197903					PTMAP5	HIST1H2BK
			ENSG00000214357	ENSG00000197971					NEURL1B	MBP
			ENSG00000214653	ENSG00000198133					HNRNPA3P3	TMEM229B
			ENSG00000214826	ENSG00000198353					DDX12P	HOXC4
			ENSG00000215417	ENSG00000198624					MIR17HG	CCDC69
			ENSG00000215784	ENSG00000198695					FAM72D	MT-ND6
			ENSG00000218422	ENSG00000198910					AC016773.1	L1CAM
			ENSG00000218502	ENSG00000198939					H2AFZP3	ZFP2
			ENSG00000223477	ENSG00000198948					RP11-314P12.2	MFAP3L
			ENSG00000224126	ENSG00000203618					UBE2SP2	GP1BB
			ENSG00000224411	ENSG00000203780					RP11-1033A18.1	FANK1
			ENSG00000224578	ENSG00000203812					CTD-2119F7.2	HIST2H2AA4
			ENSG00000225159	ENSG00000203849					RP11-40H20.2	AL583842.6
			ENSG00000225976	ENSG00000204291					RP11-192N10.2	COL15A1
			ENSG00000226261	ENSG00000204642					AC064836.3	HLA-F
			ENSG00000226650	ENSG00000204936					KIF4B	CD177
			ENSG00000226790	ENSG00000205269					HNRNPA3P1	TMEM170B
			ENSG00000226950	ENSG00000205363					DANCR	C15orf59
			ENSG00000228716	ENSG00000205795					DHFR	CYS1
			ENSG00000230002	ENSG00000206262					ALMS1-IT1	C3orf72
			ENSG00000230165	ENSG00000206561					CTB-1144G6.5	COLQ
			ENSG00000230356	ENSG00000214269					NCAPD2P1	LGMNP1
			ENSG00000230453	ENSG00000214402					ANKRD18B	LCNL1
			ENSG00000230615	ENSG00000214575					RP5-1198O20.4	CPEB1
			ENSG00000231007	ENSG00000216331					CDC20P1	HIST1H1PS1
			ENSG00000231607	ENSG00000219607					DLEU2	PPP1R3G
			ENSG00000232486	ENSG00000223361					RP11-18B3.2	FTH1P10
			ENSG00000232794	ENSG00000223947					RP11-33N11.1	AC016738.4
			ENSG00000232956	ENSG00000224596					SNHG15	RP11-202P11.1
			ENSG00000233058	ENSG00000225415					AC046143.7	RP3-509I19.1
			ENSG00000233155	ENSG00000226711					HMGA1P8	FAM66C
			ENSG00000234964	ENSG00000227120					FABP5P7	AC009238.7
			ENSG00000235036	ENSG00000228486					RP5-1099D15.1	AC017099.3
			ENSG00000235041	ENSG00000228495					RP11-330M2.4	RP3-523C21.1
			ENSG00000235489	ENSG00000228914					RP11-386C23.1	OR1H1P
			ENSG00000236581	ENSG00000228960					STARD13-AS2	OR2A9P
			ENSG00000237240	ENSG00000230529					U47924.25	CEACAMP9
			ENSG00000237649	ENSG00000230633					KIFC1	RP11-37E23.5
			ENSG00000238249	ENSG00000230836					HMGN2P17	AC104135.4
			ENSG00000238266	ENSG00000232368					RP11-799O21.1	FTLP2
			ENSG00000238917	ENSG00000233029					SNORD10	RP11-439A17.9
			ENSG00000239713	ENSG00000233899					APOBEC3G	RP4-742C19.8
			ENSG00000240747	ENSG00000234156					KRBOX1	RP11-64P14.7
			ENSG00000240859	ENSG00000234289					AC093627.10	H2BFS
			ENSG00000241343	ENSG00000235510					RPL36A	BX842568.1
			ENSG00000241634	ENSG00000235545					RP11-381E24.1	RP11-230B22.1
			ENSG00000241749	ENSG00000235563					RPSAP52	RP11-334A14.8
			ENSG00000242125	ENSG00000235649					SNHG3	MXRA5P1
			ENSG00000242265	ENSG00000235770					PEG10	LINC00607
			ENSG00000242629	ENSG00000235863					RP11-89C21.2	B3GALT4
			ENSG00000243157	ENSG00000236123					0	CEACAMP11
			ENSG00000248394	ENSG00000237803					FOSL1P1	LINC00211
			ENSG00000249121	ENSG00000238078					RP11-81F11.3	RP11-295M18.2
			ENSG00000249258	ENSG00000239887					RP11-468H14.2	C1orf226
			ENSG00000249304	ENSG00000240583					RP11-26P13.2	AQP1
			ENSG00000249353	ENSG00000240694					RP11-65F13.1	PNMA2
			ENSG00000254244	ENSG00000241104					PAICSP4	CEACAMP10
			ENSG00000255397	ENSG00000241988					AC022182.2	0
			ENSG00000255717	ENSG00000242759					SNHG1	RP11-280F2.2
			ENSG00000256268	ENSG00000244219					RP11-221N13.3	GS1-259H13.2
			ENSG00000256663	ENSG00000244242					RP11-424C20.2	IFITM10
			ENSG00000257167	ENSG00000244414					TMPO-AS1	CFHR1
			ENSG00000257199	ENSG00000244694					RP11-669B18.1	PTCHD4
			ENSG00000258445	ENSG00000246090					RP11-307P22.1	RP11-696N14.1
			ENSG00000259781	ENSG00000246273					RP11-673C5.1	SBF2-AS1
			ENSG00000259901	ENSG00000248144					RP5-991G20.4	ADH1C
			ENSG00000260260	ENSG00000248290					RP11-304L19.5	TNXA
				ENSG00000248587						GDNF-AS1
				ENSG00000249087						C1orf213
				ENSG00000249119						MTND6P4
				ENSG00000250742						RP11-834C11.4
				ENSG00000250802						ZBED3-AS1
				ENSG00000253159						PCDHGA12
				ENSG00000253305						PCDHGB6
				ENSG00000254122						PCDHGB7
				ENSG00000254818						RP11-529A4.4
				ENSG00000255346						NOX5
				ENSG00000256043						CTSO
				ENSG00000256612						AC008537.2
				ENSG00000257410						RP11-2H8.2
				ENSG00000259091						LINC00517
				ENSG00000259207						ITGB3
				ENSG00000259345						RP11-624L4.1
				ENSG00000259583						RP11-66B24.4
				ENSG00000259787						CTB-85P21.2
				ENSG00000260077						RP11-254F7.2
				ENSG00000260257						RP5-1085F17.3
				ENSG00000260400						RP11-119F7.5
				ENSG00000260461						RP11-541N10.3
				ENSG00000260916						CCPG1
				ENSG00000261115						TMEM178B
				ENSG00000261179						RP11-13L2.4
				ENSG00000261295						RP11-524D16__A.3
				ENSG00000261324						RP11-174G6.5
