# Supplementary material for: Similarities in Gene Expression Profiles during In Vitro Aging of Primary Human Embryonic Lung and Foreskin Fibroblasts
Source: Biomed Res Int. 2015 Aug 3;2015:731938. doi: 10.1155/2015/731938 (PMC4538583; doi:10.1155/2015/731938)
Supplement: Supplementary file 1 — Suppl. Figure 1: (A) Growth curve of MRC-5 and HFF fibroblasts derived from a single vial and maintained in culture as triplicates from an early PD until senescence at late PDs. Data points of all measurements are displayed (not the mean). PDs specified in the plot denoted the time points were the total RNA was collected and subjected to RNA-seq. Black line denotes MRC-5 and green denotes HFF (B) Percentage of SA-β Gal positive cells at different time points of their growth in culture in MRC-5 and HFF fibroblasts. Each curve is measured in triplicate, the mean value is displayed with error bar (± S.E). Red line denotes MRC-5 and black denotes HFF. Suppl. Figure 2: TreeMaps produced using REVIGO () summarizing: (A) 12 GO cellular component (CC) terms found for cluster 3. (B) 21 GO CC terms found for cluster 5. Both clusters contain up-regulated genes but exhibit differences between MRC-5 and HFF. Suppl. Figure 3: TreeMaps produced using REVIGO () summarizing: (A) 59 GO biological processes (BP) terms found for cluster 2. (B) 162 GO BP terms found for cluster 4. Both clusters contain down-regulated genes. Suppl. Figure 4: TreeMaps produced using REVIGO () summarizing 24 GO BP terms found for cluster 1. Suppl. Figure 5: Venn plots showing the number of detected significantly monotonically expression pattern. (A, B): up-/down-regulated in both MRC-5 and HFF. (C) up-regulated in MRC-5 and down-regulated in HFF. (D): vice versa of (C). Suppl. Figure 6: Functional association networks generated using (A) STRING DB and (B) Cognoscente including 23 genes found to be monotonically expressed across the five PD. (A) Only connections between four genes were found using STRING DB. Different line colors represent the types of evidence for the association, explained on the right. (B) Nodes outlined in red are the 23 input genes. There were no interactions found for PCDHB16. 19 intermediates were included by the tool. The edge colors indicate the type of interaction, as explained in [file 731938.f1.zip › mat.731938.v2/SupplTable3_MRC5_HFF_FungiFun_for_5Cluster.xls]

## Sheet: Cluster_1_GO
GO ID	GO name	GO namespace	Exact p-value	Adjusted p-value	# genes / category	# genes / input
GO:0007155	cell adhesion	BP	8.0403e-8	0.00015662	26 / 630	25 / 270
GO:0032496	response to lipopolysaccharide	BP	3.4413e-7	0.00033519	12 / 149	11 / 270
GO:0006865	amino acid transport	BP	1.6688e-06	0.0010836	7 / 47	7 / 270
GO:0015175	neutral amino acid transmembrane transporter activity	MF	7.0256e-06	0.002883	4 / 11	4 / 270
GO:0006564	L-serine biosynthetic process	BP	7.3999e-06	0.002883	3 / 4	3 / 270
GO:0003333	amino acid transmembrane transport	BP	1.2027e-05	0.0039048	5 / 25	5 / 270
GO:0001570	vasculogenesis	BP	1.5294e-05	0.0042562	7 / 65	7 / 270
GO:0007420	brain development	BP	1.8983e-05	0.0046223	12 / 219	12 / 270
GO:0001525	angiogenesis	BP	2.2715e-05	0.0049165	12 / 223	12 / 270
GO:0004957	prostaglandin E receptor activity	MF	3.6325e-05	0.0070762	3 / 6	2 / 270
GO:0006937	regulation of muscle contraction	BP	7.6336e-05	0.013518	4 / 19	3 / 270
GO:0044344	cellular response to fibroblast growth factor stimulus	BP	9.4498e-05	0.014649	4 / 20	4 / 270
GO:0005578	proteinaceous extracellular matrix	CC	9.7762e-05	0.014649	13 / 300	13 / 270
GO:0009897	external side of plasma membrane	CC	0.00013747	0.019128	10 / 191	9 / 270
GO:0030198	extracellular matrix organization	BP	0.00014903	0.019354	13 / 313	13 / 270
GO:0015171	amino acid transmembrane transporter activity	MF	0.00016775	0.020424	4 / 23	4 / 270
GO:0016021	integral component of membrane	CC	0.00021419	0.024543	90 / 5242	87 / 270
GO:0001649	osteoblast differentiation	BP	0.00022926	0.024811	7 / 99	7 / 270
GO:0030324	lung development	BP	0.0003489	0.032337	7 / 106	7 / 270
GO:0035094	response to nicotine	BP	0.00042452	0.032337	4 / 29	4 / 270
GO:0006407	rRNA export from nucleus	BP	0.00045308	0.032337	2 / 3	1 / 270
GO:0009922	fatty acid elongase activity	MF	0.00045308	0.032337	2 / 3	1 / 270
GO:0000461	endonucleolytic cleavage to generate mature 3'-end of SSU-rRNA from (SSU-rRNA, 5.8S rRNA, LSU-rRNA)	BP	0.00045308	0.032337	2 / 3	1 / 270
GO:0004948	calcitonin receptor activity	MF	0.00045308	0.032337	2 / 3	2 / 270
GO:0005055	laminin receptor activity	MF	0.00045308	0.032337	2 / 3	1 / 270
GO:0055106	ubiquitin-protein transferase regulator activity	MF	0.00045308	0.032337	2 / 3	2 / 270
GO:0014707	branchiomeric skeletal muscle development	BP	0.00045308	0.032337	2 / 3	2 / 270
GO:0051384	response to glucocorticoid	BP	0.00046988	0.032337	6 / 80	6 / 270
GO:0004872	receptor activity	MF	0.00048141	0.032337	11 / 265	10 / 270
GO:0015804	neutral amino acid transport	BP	0.00061439	0.039894	3 / 14	3 / 270
GO:0007158	neuron cell-cell adhesion	BP	0.00076099	0.047318	3 / 15	2 / 270
GO:0046983	protein dimerization activity	MF	0.00079517	0.047318	9 / 197	8 / 270
GO:0005886	plasma membrane	CC	0.00080758	0.047318	74 / 4266	71 / 270
GO:0008652	cellular amino acid biosynthetic process	BP	0.00088311	0.047318	4 / 35	4 / 270
GO:0021938	smoothened signaling pathway involved in regulation of cerebellar granule cell precursor cell proliferation	BP	0.00089875	0.047318	2 / 4	2 / 270
GO:0034626	fatty acid elongation, polyunsaturated fatty acid	BP	0.00089875	0.047318	2 / 4	1 / 270
GO:0031014	troponin T binding	MF	0.00089875	0.047318	2 / 4	1 / 270
GO:0014032	neural crest cell development	BP	0.00092809	0.047577	3 / 16	3 / 270

## Sheet: Cluster_2_GO
GO ID	GO name	GO namespace	Exact p-value	Adjusted p-value	# genes / category	# genes / input
GO:0045429	positive regulation of nitric oxide biosynthetic process	BP	8.7885e-7	0.0016101	6 / 32	6 / 259
GO:0003700	sequence-specific DNA binding transcription factor activity	MF	3.6978e-06	0.0027351	27 / 975	27 / 259
GO:0008330	protein tyrosine/threonine phosphatase activity	MF	4.479e-06	0.0027351	3 / 4	3 / 259
GO:0045893	positive regulation of transcription, DNA-templated	BP	7.0846e-06	0.0032447	19 / 560	19 / 259
GO:2000107	negative regulation of leukocyte apoptotic process	BP	1.1111e-05	0.0033211	3 / 5	3 / 259
GO:0051591	response to cAMP	BP	1.3179e-05	0.0033211	6 / 50	6 / 259
GO:0000188	inactivation of MAPK activity	BP	1.3736e-05	0.0033211	5 / 30	5 / 259
GO:0017017	MAP kinase tyrosine/serine/threonine phosphatase activity	MF	1.4502e-05	0.0033211	4 / 15	4 / 259
GO:0001706	endoderm formation	BP	1.9178e-05	0.0039039	4 / 16	4 / 259
GO:0000122	negative regulation of transcription from RNA polymerase II promoter	BP	2.7316e-05	0.0042136	19 / 617	19 / 259
GO:0032496	response to lipopolysaccharide	BP	2.7693e-05	0.0042136	9 / 149	9 / 259
GO:0071363	cellular response to growth factor stimulus	BP	2.8321e-05	0.0042136	6 / 57	6 / 259
GO:0042493	response to drug	BP	2.99e-05	0.0042136	13 / 316	13 / 259
GO:0071499	cellular response to laminar fluid shear stress	BP	3.829e-05	0.0045108	3 / 7	3 / 259
GO:0006954	inflammatory response	BP	3.8718e-05	0.0045108	13 / 324	12 / 259
GO:0009416	response to light stimulus	BP	3.9851e-05	0.0045108	4 / 19	4 / 259
GO:0009612	response to mechanical stimulus	BP	4.1858e-05	0.0045108	6 / 61	6 / 259
GO:0032729	positive regulation of interferon-gamma production	BP	5.8265e-05	0.005784	5 / 40	5 / 259
GO:0008217	regulation of blood pressure	BP	6.0146e-05	0.005784	6 / 65	5 / 259
GO:0031012	extracellular matrix	CC	6.3144e-05	0.005784	11 / 248	11 / 259
GO:0070301	cellular response to hydrogen peroxide	BP	7.4059e-05	0.0064608	5 / 42	5 / 259
GO:0071409	cellular response to cycloheximide	BP	0.00010894	0.0086309	2 / 2	2 / 259
GO:0002277	myeloid dendritic cell activation involved in immune response	BP	0.00010894	0.0086309	2 / 2	2 / 259
GO:0048661	positive regulation of smooth muscle cell proliferation	BP	0.00011536	0.0086309	5 / 46	5 / 259
GO:0008134	transcription factor binding	MF	0.00011778	0.0086309	11 / 266	11 / 259
GO:0043394	proteoglycan binding	MF	0.00012827	0.0090378	3 / 10	3 / 259
GO:1901653	cellular response to peptide	BP	0.00017501	0.011875	3 / 11	3 / 259
GO:0007275	multicellular organismal development	BP	0.00019015	0.012441	25 / 1091	25 / 259
GO:0043392	negative regulation of DNA binding	BP	0.000225	0.014169	4 / 29	4 / 259
GO:0050900	leukocyte migration	BP	0.00023202	0.014169	7 / 117	7 / 259
GO:0032570	response to progesterone	BP	0.00029324	0.017329	4 / 31	4 / 259
GO:0042102	positive regulation of T cell proliferation	BP	0.00032109	0.017329	5 / 57	5 / 259
GO:0071222	cellular response to lipopolysaccharide	BP	0.00032345	0.017329	6 / 88	6 / 259
GO:0004666	prostaglandin-endoperoxide synthase activity	MF	0.00032455	0.017329	2 / 3	1 / 259
GO:0005578	proteinaceous extracellular matrix	CC	0.00033325	0.017329	11 / 300	11 / 259
GO:0043565	sequence-specific DNA binding	MF	0.00034052	0.017329	16 / 570	16 / 259
GO:0032870	cellular response to hormone stimulus	BP	0.00042175	0.020601	4 / 34	4 / 259
GO:0003690	double-stranded DNA binding	MF	0.00046145	0.020601	6 / 94	6 / 259
GO:0014070	response to organic cyclic compound	BP	0.00046185	0.020601	7 / 131	7 / 259
GO:0019371	cyclooxygenase pathway	BP	0.00046791	0.020601	3 / 15	2 / 259
GO:0010035	response to inorganic substance	BP	0.00046791	0.020601	3 / 15	3 / 259
GO:0071310	cellular response to organic substance	BP	0.0004723	0.020601	4 / 35	4 / 259
GO:0010803	regulation of tumor necrosis factor-mediated signaling pathway	BP	0.00064463	0.026244	2 / 4	2 / 259
GO:0042731	PH domain binding	MF	0.00064463	0.026244	2 / 4	2 / 259
GO:0045833	negative regulation of lipid metabolic process	BP	0.00064463	0.026244	2 / 4	2 / 259
GO:0045987	positive regulation of smooth muscle contraction	BP	0.00068859	0.027424	3 / 17	3 / 259
GO:0030838	positive regulation of actin filament polymerization	BP	0.00071811	0.027807	4 / 39	4 / 259
GO:0042472	inner ear morphogenesis	BP	0.00072856	0.027807	5 / 68	5 / 259
GO:0043153	entrainment of circadian clock by photoperiod	BP	0.00081997	0.030044	3 / 18	3 / 259
GO:0042346	positive regulation of NF-kappaB import into nucleus	BP	0.00081997	0.030044	3 / 18	3 / 259
GO:0048705	skeletal system morphogenesis	BP	0.00086987	0.030811	4 / 41	4 / 259
GO:0006355	regulation of transcription, DNA-templated	BP	0.00087454	0.030811	43 / 2543	43 / 259
GO:0008360	regulation of cell shape	BP	0.0010086	0.034442	6 / 109	6 / 259
GO:0000979	RNA polymerase II core promoter sequence-specific DNA binding	MF	0.0010429	0.034442	4 / 43	4 / 259
GO:0031622	positive regulation of fever generation	BP	0.001067	0.034442	2 / 5	2 / 259
GO:0001768	establishment of T cell polarity	BP	0.001067	0.034442	2 / 5	2 / 259
GO:0001077	RNA polymerase II core promoter proximal region sequence-specific DNA binding transcription factor activity involved in positive regulation of transcription	MF	0.0010716	0.034442	7 / 151	7 / 259
GO:0008138	protein tyrosine/serine/threonine phosphatase activity	MF	0.0012388	0.037931	4 / 45	4 / 259
GO:0035914	skeletal muscle cell differentiation	BP	0.0012388	0.037931	4 / 45	4 / 259
GO:0008285	negative regulation of cell proliferation	BP	0.0012423	0.037931	12 / 407	12 / 259
GO:0051090	regulation of sequence-specific DNA binding transcription factor activity	BP	0.0013059	0.039221	3 / 21	3 / 259
GO:0022617	extracellular matrix disassembly	BP	0.001331	0.03933	6 / 115	6 / 259
GO:0050870	positive regulation of T cell activation	BP	0.0015006	0.042201	3 / 22	3 / 259
GO:0048844	artery morphogenesis	BP	0.0015006	0.042201	3 / 22	3 / 259
GO:0019221	cytokine-mediated signaling pathway	BP	0.0015012	0.042201	9 / 255	9 / 259
GO:0009649	entrainment of circadian clock	BP	0.0015894	0.042201	2 / 6	2 / 259
GO:0051247	positive regulation of protein metabolic process	BP	0.0015894	0.042201	2 / 6	2 / 259
GO:0035065	regulation of histone acetylation	BP	0.0015894	0.042201	2 / 6	2 / 259
GO:0044351	macropinocytosis	BP	0.0015894	0.042201	2 / 6	2 / 259
GO:0035690	cellular response to drug	BP	0.0017053	0.042394	4 / 49	4 / 259
GO:0043065	positive regulation of apoptotic process	BP	0.0017086	0.042394	10 / 312	10 / 259
GO:0017080	sodium channel regulator activity	MF	0.0017124	0.042394	3 / 23	3 / 259
GO:0051412	response to corticosterone	BP	0.0017124	0.042394	3 / 23	3 / 259
GO:0010575	positive regulation vascular endothelial growth factor production	BP	0.0017124	0.042394	3 / 23	3 / 259
GO:0000977	RNA polymerase II regulatory region sequence-specific DNA binding	MF	0.0017888	0.043695	5 / 83	5 / 259
GO:0050840	extracellular matrix binding	MF	0.0019421	0.046814	3 / 24	3 / 259

## Sheet: Cluster_4_GO
GO ID	GO name	GO namespace	Exact p-value	Adjusted p-value	# genes / category	# genes / input
GO:0000278	mitotic cell cycle	BP	3.5755e-97	6.636e-94	112 / 401	113 / 461
GO:0007049	cell cycle	BP	1.6027e-96	1.4873e-93	131 / 632	131 / 461
GO:0007067	mitotic nuclear division	BP	6.7604e-72	4.1825e-69	82 / 281	82 / 461
GO:0051301	cell division	BP	4.92e-68	2.2829e-65	87 / 365	88 / 461
GO:0006260	DNA replication	BP	1.3624e-48	5.0574e-46	52 / 157	52 / 461
GO:0000775	chromosome, centromeric region	CC	1.2294e-43	3.803e-41	45 / 127	46 / 461
GO:0005654	nucleoplasm	CC	1.0664e-42	2.8274e-40	104 / 1058	104 / 461
GO:0005694	chromosome	CC	5.2839e-42	1.2259e-39	63 / 337	64 / 461
GO:0005634	nucleus	CC	4.7071e-33	9.7071e-31	242 / 6196	240 / 461
GO:0000776	kinetochore	CC	7.4003e-33	1.3735e-30	35 / 106	35 / 461
GO:0006271	DNA strand elongation involved in DNA replication	BP	7.6534e-31	1.2913e-28	22 / 31	22 / 461
GO:0000082	G1/S transition of mitotic cell cycle	BP	2.9083e-29	4.4981e-27	37 / 152	36 / 461
GO:0006281	DNA repair	BP	2.1189e-27	3.0251e-25	50 / 354	49 / 461
GO:0007059	chromosome segregation	BP	1.7093e-25	2.2661e-23	26 / 74	26 / 461
GO:0006974	cellular response to DNA damage stimulus	BP	5.5052e-22	6.8118e-20	47 / 407	47 / 461
GO:0005856	cytoskeleton	CC	3.9908e-20	4.3688e-18	75 / 1113	76 / 461
GO:0005730	nucleolus	CC	4.0016e-20	4.3688e-18	94 / 1655	93 / 461
GO:0005524	ATP binding	MF	1.043e-18	1.0754e-16	86 / 1494	86 / 461
GO:0005515	protein binding	MF	1.1731e-18	1.146e-16	212 / 6231	210 / 461
GO:0006270	DNA replication initiation	BP	3.2196e-18	2.9878e-16	14 / 24	14 / 461
GO:0032201	telomere maintenance via semi-conservative replication	BP	4.175e-17	3.6899e-15	13 / 22	13 / 461
GO:0034080	CENP-A containing nucleosome assembly	BP	9.4249e-17	7.9512e-15	13 / 23	13 / 461
GO:0005819	spindle	CC	1.9531e-16	1.5761e-14	19 / 71	19 / 461
GO:0000070	mitotic sister chromatid segregation	BP	5.3921e-16	4.1699e-14	12 / 20	12 / 461
GO:0000722	telomere maintenance via recombination	BP	8.1012e-16	6.0143e-14	13 / 26	13 / 461
GO:0005737	cytoplasm	CC	1.153e-15	8.2305e-14	199 / 6006	199 / 461
GO:0000922	spindle pole	CC	3.6246e-15	2.4916e-13	17 / 61	17 / 461
GO:0005874	microtubule	CC	3.762e-15	2.4937e-13	34 / 318	33 / 461
GO:0000086	G2/M transition of mitotic cell cycle	BP	1.0837e-14	6.9359e-13	23 / 139	23 / 461
GO:0051726	regulation of cell cycle	BP	1.4923e-14	9.2324e-13	23 / 141	23 / 461
GO:0008017	microtubule binding	MF	7.2761e-14	4.3563e-12	24 / 167	24 / 461
GO:0005813	centrosome	CC	1.4536e-13	8.4308e-12	34 / 360	34 / 461
GO:0000723	telomere maintenance	BP	2.2121e-13	1.2441e-11	15 / 55	15 / 461
GO:0000166	nucleotide binding	MF	3.4567e-13	1.887e-11	92 / 2055	92 / 461
GO:0006334	nucleosome assembly	BP	1.6799e-12	8.9081e-11	17 / 86	17 / 461
GO:0007018	microtubule-based movement	BP	2.204e-12	1.1363e-10	16 / 75	16 / 461
GO:0005871	kinesin complex	CC	2.2933e-12	1.1504e-10	14 / 53	14 / 461
GO:0030496	midbody	CC	6.3823e-12	3.0438e-10	17 / 93	18 / 461
GO:0000083	regulation of transcription involved in G1/S transition of mitotic cell cycle	BP	6.396e-12	3.0438e-10	10 / 22	10 / 461
GO:0005829	cytosol	CC	8.7124e-12	4.0425e-10	102 / 2534	104 / 461
GO:0030261	chromosome condensation	BP	2.5261e-11	1.1435e-9	9 / 18	9 / 461
GO:0005876	spindle microtubule	CC	3.1919e-11	1.4105e-9	11 / 33	11 / 461
GO:0007076	mitotic chromosome condensation	BP	3.5655e-11	1.539e-9	8 / 13	8 / 461
GO:0008283	cell proliferation	BP	4.011e-11	1.6919e-9	31 / 370	33 / 461
GO:0006200	ATP catabolic process	BP	4.4781e-11	1.847e-9	29 / 327	29 / 461
GO:0042555	MCM complex	CC	5.2031e-11	2.0836e-9	7 / 9	7 / 461
GO:0003777	microtubule motor activity	MF	5.2764e-11	2.0836e-9	15 / 78	15 / 461
GO:0000793	condensed chromosome	CC	1.7417e-10	6.7346e-9	10 / 29	10 / 461
GO:0006297	nucleotide-excision repair, DNA gap filling	BP	2.4023e-10	9.0994e-9	9 / 22	9 / 461
GO:0000724	double-strand break repair via homologous recombination	BP	2.662e-10	9.8815e-9	13 / 61	13 / 461
GO:0003678	DNA helicase activity	MF	6.0882e-10	2.2156e-8	9 / 24	9 / 461
GO:0000079	regulation of cyclin-dependent protein serine/threonine kinase activity	BP	1.2239e-9	4.3685e-8	12 / 56	12 / 461
GO:0007080	mitotic metaphase plate congression	BP	2.3092e-9	8.0864e-8	7 / 13	7 / 461
GO:0071897	DNA biosynthetic process	BP	2.6146e-9	8.9864e-8	10 / 37	10 / 461
GO:0000785	chromatin	CC	3.19e-9	1.0765e-7	14 / 88	14 / 461
GO:0000796	condensin complex	CC	3.626e-9	1.2017e-7	5 / 5	5 / 461
GO:0003677	DNA binding	MF	4.0504e-9	1.2978e-7	88 / 2293	87 / 461
GO:0006310	DNA recombination	BP	4.0557e-9	1.2978e-7	15 / 105	14 / 461
GO:0000940	condensed chromosome outer kinetochore	CC	5.8807e-9	1.8055e-7	6 / 9	6 / 461
GO:0000777	condensed chromosome kinetochore	CC	5.8807e-9	1.8055e-7	6 / 9	6 / 461
GO:0004386	helicase activity	MF	5.934e-9	1.8055e-7	17 / 142	16 / 461
GO:0006302	double-strand break repair	BP	7.4706e-9	2.2364e-7	12 / 65	12 / 461
GO:0000910	cytokinesis	BP	8.6853e-9	2.5587e-7	11 / 53	11 / 461
GO:0006268	DNA unwinding involved in DNA replication	BP	1.4446e-8	4.1894e-7	6 / 10	6 / 461
GO:0032508	DNA duplex unwinding	BP	2.0673e-8	5.9029e-7	10 / 45	10 / 461
GO:0051276	chromosome organization	BP	1.1926e-7	3.3537e-06	8 / 30	8 / 461
GO:0016887	ATPase activity	MF	1.3648e-7	3.7807e-06	18 / 196	18 / 461
GO:0000228	nuclear chromosome	CC	1.5787e-7	4.3089e-06	8 / 31	8 / 461
GO:0031262	Ndc80 complex	CC	1.7772e-7	4.7804e-06	4 / 4	4 / 461
GO:0034501	protein localization to kinetochore	BP	1.929e-7	5.1147e-06	5 / 8	6 / 461
GO:0007094	mitotic spindle assembly checkpoint	BP	2.0673e-7	5.4041e-06	8 / 32	8 / 461
GO:0015630	microtubule cytoskeleton	CC	7.1868e-7	1.8447e-05	14 / 134	14 / 461
GO:0031145	anaphase-promoting complex-dependent proteasomal ubiquitin-dependent protein catabolic process	BP	7.2554e-7	1.8447e-05	11 / 80	12 / 461
GO:0003682	chromatin binding	MF	9.5267e-7	2.3894e-05	24 / 373	24 / 461
GO:0005657	replication fork	CC	1.1101e-06	2.7472e-05	6 / 18	6 / 461
GO:0051382	kinetochore assembly	BP	1.512e-06	3.6445e-05	5 / 11	5 / 461
GO:0045120	pronucleus	CC	1.512e-06	3.6445e-05	5 / 11	5 / 461
GO:0072686	mitotic spindle	CC	1.5794e-06	3.7581e-05	7 / 29	7 / 461
GO:0006289	nucleotide-excision repair	BP	1.8578e-06	4.3647e-05	10 / 71	10 / 461
GO:0007088	regulation of mitosis	BP	2.2382e-06	5.1927e-05	6 / 20	6 / 461
GO:0010369	chromocenter	CC	2.5481e-06	5.8385e-05	5 / 12	6 / 461
GO:0005663	DNA replication factor C complex	CC	2.5795e-06	5.8385e-05	4 / 6	4 / 461
GO:0003697	single-stranded DNA binding	MF	2.7361e-06	6.0456e-05	10 / 74	11 / 461
GO:0042393	histone binding	MF	2.7361e-06	6.0456e-05	10 / 74	10 / 461
GO:0007052	mitotic spindle organization	BP	3.0792e-06	6.7236e-05	6 / 21	6 / 461
GO:0007093	mitotic cell cycle checkpoint	BP	3.2291e-06	6.9689e-05	7 / 32	7 / 461
GO:0005635	nuclear envelope	CC	3.7686e-06	8.0397e-05	12 / 113	12 / 461
GO:0007051	spindle organization	BP	4.0707e-06	8.5855e-05	5 / 13	5 / 461
GO:0000281	mitotic cytokinesis	BP	4.1606e-06	8.6766e-05	6 / 22	6 / 461
GO:0006283	transcription-coupled nucleotide-excision repair	BP	4.7176e-06	9.7287e-05	8 / 47	8 / 461
GO:0007126	meiotic nuclear division	BP	5.5317e-06	0.00011282	6 / 23	6 / 461
GO:0051321	meiotic cell cycle	BP	5.6194e-06	0.00011336	10 / 80	10 / 461
GO:0000076	DNA replication checkpoint	BP	5.9207e-06	0.00011567	4 / 7	4 / 461
GO:0007019	microtubule depolymerization	BP	5.9207e-06	0.00011567	4 / 7	4 / 461
GO:0007091	metaphase/anaphase transition of mitotic cell cycle	BP	5.9207e-06	0.00011567	4 / 7	4 / 461
GO:0000794	condensed nuclear chromosome	CC	6.1167e-06	0.00011826	7 / 35	7 / 461
GO:0043142	single-stranded DNA-dependent ATPase activity	MF	8.6885e-06	0.00015966	3 / 3	3 / 461
GO:0097149	centralspindlin complex	CC	8.6885e-06	0.00015966	3 / 3	3 / 461
GO:0000942	condensed nuclear chromosome outer kinetochore	CC	8.6885e-06	0.00015966	3 / 3	3 / 461
GO:0051383	kinetochore organization	BP	8.6885e-06	0.00015966	3 / 3	3 / 461
GO:0047844	deoxycytidine deaminase activity	MF	8.6885e-06	0.00015966	3 / 3	3 / 461
GO:0019901	protein kinase binding	MF	8.9862e-06	0.00016351	21 / 341	21 / 461
GO:0051988	regulation of attachment of spindle microtubules to kinetochore	BP	1.1649e-05	0.00020788	4 / 8	4 / 461
GO:0008608	attachment of spindle microtubules to kinetochore	BP	1.1649e-05	0.00020788	4 / 8	5 / 461
GO:0071479	cellular response to ionizing radiation	BP	1.1973e-05	0.00021163	6 / 26	6 / 461
GO:0008574	plus-end-directed microtubule motor activity	MF	1.8283e-05	0.00031714	5 / 17	5 / 461
GO:0001556	oocyte maturation	BP	1.8283e-05	0.00031714	5 / 17	5 / 461
GO:0000780	condensed nuclear chromosome, centromeric region	CC	2.0626e-05	0.00035446	4 / 9	5 / 461
GO:0006259	DNA metabolic process	BP	2.1675e-05	0.00036695	7 / 42	7 / 461
GO:0019886	antigen processing and presentation of exogenous peptide antigen via MHC class II	BP	2.1748e-05	0.00036695	10 / 93	10 / 461
GO:0000790	nuclear chromatin	CC	2.5301e-05	0.00042306	12 / 136	12 / 461
GO:0000226	microtubule cytoskeleton organization	BP	2.8659e-05	0.00047303	9 / 77	9 / 461
GO:0000077	DNA damage checkpoint	BP	2.88e-05	0.00047303	6 / 30	6 / 461
GO:0000731	DNA synthesis involved in DNA repair	BP	3.3817e-05	0.00051221	4 / 10	4 / 461
GO:0006335	DNA replication-dependent nucleosome assembly	BP	3.3817e-05	0.00051221	4 / 10	4 / 461
GO:0034508	centromere complex assembly	BP	3.4221e-05	0.00051221	3 / 4	3 / 461
GO:0045132	meiotic chromosome segregation	BP	3.4221e-05	0.00051221	3 / 4	3 / 461
GO:0043137	DNA replication, removal of RNA primer	BP	3.4221e-05	0.00051221	3 / 4	3 / 461
GO:0043515	kinetochore binding	MF	3.4221e-05	0.00051221	3 / 4	3 / 461
GO:0005658	alpha DNA polymerase:primase complex	CC	3.4221e-05	0.00051221	3 / 4	3 / 461
GO:0071459	protein localization to chromosome, centromeric region	BP	3.4221e-05	0.00051221	3 / 4	3 / 461
GO:0032133	chromosome passenger complex	CC	3.4221e-05	0.00051221	3 / 4	4 / 461
GO:0000778	condensed nuclear chromosome kinetochore	CC	3.4221e-05	0.00051221	3 / 4	3 / 461
GO:0031577	spindle checkpoint	BP	3.4221e-05	0.00051221	3 / 4	4 / 461
GO:0003887	DNA-directed DNA polymerase activity	MF	3.5095e-05	0.00051696	6 / 31	6 / 461
GO:0004003	ATP-dependent DNA helicase activity	MF	3.5095e-05	0.00051696	6 / 31	7 / 461
GO:0031572	G2 DNA damage checkpoint	BP	4.3531e-05	0.00063617	5 / 20	5 / 461
GO:0004674	protein serine/threonine kinase activity	MF	5.9175e-05	0.00085803	22 / 417	23 / 461
GO:0006139	nucleobase-containing compound metabolic process	BP	6.8353e-05	0.00098343	8 / 67	8 / 461
GO:0045171	intercellular bridge	CC	7.2169e-05	0.0010304	6 / 35	7 / 461
GO:0010569	regulation of double-strand break repair via homologous recombination	BP	7.7143e-05	0.0010847	4 / 12	4 / 461
GO:0019985	translesion synthesis	BP	7.7143e-05	0.0010847	4 / 12	4 / 461
GO:0060236	regulation of mitotic spindle organization	BP	8.4241e-05	0.0011168	3 / 5	3 / 461
GO:0009113	purine nucleobase biosynthetic process	BP	8.4241e-05	0.0011168	3 / 5	3 / 461
GO:0051256	mitotic spindle midzone assembly	BP	8.4241e-05	0.0011168	3 / 5	4 / 461
GO:0006312	mitotic recombination	BP	8.4241e-05	0.0011168	3 / 5	3 / 461
GO:0010571	positive regulation of nuclear cell cycle DNA replication	BP	8.4241e-05	0.0011168	3 / 5	3 / 461
GO:0000779	condensed chromosome, centromeric region	CC	8.4241e-05	0.0011168	3 / 5	4 / 461
GO:0010216	maintenance of DNA methylation	BP	8.4241e-05	0.0011168	3 / 5	3 / 461
GO:0071168	protein localization to chromatin	BP	8.4241e-05	0.0011168	3 / 5	3 / 461
GO:0051539	4 iron, 4 sulfur cluster binding	MF	0.00013533	0.0017813	6 / 39	6 / 461
GO:0006978	DNA damage response, signal transduction by p53 class mediator resulting in transcription of p21 class mediator	BP	0.00015098	0.0019733	4 / 14	4 / 461
GO:0051439	regulation of ubiquitin-protein ligase activity involved in mitotic cell cycle	BP	0.00015324	0.0019889	8 / 75	8 / 461
GO:0043009	chordate embryonic development	BP	0.0001659	0.002109	3 / 6	3 / 461
GO:0006189	'de novo' IMP biosynthetic process	BP	0.0001659	0.002109	3 / 6	3 / 461
GO:0000405	bubble DNA binding	MF	0.0001659	0.002109	3 / 6	3 / 461
GO:0051233	spindle midzone	CC	0.00020254	0.0025572	4 / 15	4 / 461
GO:0006284	base-excision repair	BP	0.00020655	0.0025903	6 / 42	6 / 461
GO:0051983	regulation of chromosome segregation	BP	0.00028589	0.0034499	3 / 7	4 / 461
GO:0010529	negative regulation of transposition	BP	0.00028589	0.0034499	3 / 7	3 / 461
GO:0036310	annealing helicase activity	MF	0.00028589	0.0034499	3 / 7	3 / 461
GO:0070182	DNA polymerase binding	MF	0.00028589	0.0034499	3 / 7	3 / 461
GO:0051297	centrosome organization	BP	0.00028625	0.0034499	5 / 29	5 / 461
GO:0051225	spindle assembly	BP	0.00028625	0.0034499	5 / 29	5 / 461
GO:0032467	positive regulation of cytokinesis	BP	0.00033774	0.0040263	5 / 30	6 / 461
GO:0003684	damaged DNA binding	MF	0.00033842	0.0040263	7 / 64	7 / 461
GO:0000022	mitotic spindle elongation	BP	0.0004237	0.0047373	2 / 2	2 / 461
GO:0040001	establishment of mitotic spindle localization	BP	0.0004237	0.0047373	2 / 2	2 / 461
GO:0015616	DNA translocase activity	MF	0.0004237	0.0047373	2 / 2	2 / 461
GO:0046602	regulation of mitotic centrosome separation	BP	0.0004237	0.0047373	2 / 2	2 / 461
GO:0031436	BRCA1-BARD1 complex	CC	0.0004237	0.0047373	2 / 2	2 / 461
GO:0048256	flap endonuclease activity	MF	0.0004237	0.0047373	2 / 2	2 / 461
GO:0030892	mitotic cohesin complex	CC	0.0004237	0.0047373	2 / 2	2 / 461
GO:0043146	spindle stabilization	BP	0.0004237	0.0047373	2 / 2	3 / 461
GO:0007057	spindle assembly involved in female meiosis I	BP	0.0004237	0.0047373	2 / 2	2 / 461
GO:0072354	histone kinase activity (H3-T3 specific)	MF	0.0004237	0.0047373	2 / 2	2 / 461
GO:0000733	DNA strand renaturation	BP	0.00045043	0.0049177	3 / 8	3 / 461
GO:0085020	protein K6-linked ubiquitination	BP	0.00045043	0.0049177	3 / 8	3 / 461
GO:0030071	regulation of mitotic metaphase/anaphase transition	BP	0.00045043	0.0049177	3 / 8	3 / 461
GO:0040020	regulation of meiosis	BP	0.00045043	0.0049177	3 / 8	3 / 461
GO:0017048	Rho GTPase binding	MF	0.00061639	0.0066902	5 / 34	5 / 461
GO:0016538	cyclin-dependent protein serine/threonine kinase regulator activity	MF	0.00066534	0.0071379	3 / 9	3 / 461
GO:0005664	nuclear origin of replication recognition complex	CC	0.00066534	0.0071379	3 / 9	3 / 461
GO:0005881	cytoplasmic microtubule	CC	0.00067426	0.0071921	6 / 52	6 / 461
GO:0005814	centriole	CC	0.00069721	0.0073944	7 / 72	7 / 461
GO:0004672	protein kinase activity	MF	0.00081694	0.008615	23 / 537	24 / 461
GO:0007077	mitotic nuclear envelope disassembly	BP	0.00091797	0.0096258	5 / 37	5 / 461
GO:0005721	pericentric heterochromatin	CC	0.00093599	0.0097595	3 / 10	3 / 461
GO:0055086	nucleobase-containing small molecule metabolic process	BP	0.0011255	0.01167	7 / 78	7 / 461
GO:0006306	DNA methylation	BP	0.0011533	0.01188	4 / 23	4 / 461
GO:0031493	nucleosomal histone binding	MF	0.0012537	0.01188	2 / 3	2 / 461
GO:0072711	cellular response to hydroxyurea	BP	0.0012537	0.01188	2 / 3	2 / 461
GO:0007127	meiosis I	BP	0.0012537	0.01188	2 / 3	2 / 461
GO:0004748	ribonucleoside-diphosphate reductase activity, thioredoxin disulfide as acceptor	MF	0.0012537	0.01188	2 / 3	2 / 461
GO:0071173	spindle assembly checkpoint	BP	0.0012537	0.01188	2 / 3	2 / 461
GO:0007079	mitotic chromosome movement towards spindle pole	BP	0.0012537	0.01188	2 / 3	2 / 461
GO:0033314	mitotic DNA replication checkpoint	BP	0.0012537	0.01188	2 / 3	2 / 461
GO:0009263	deoxyribonucleotide biosynthetic process	BP	0.0012537	0.01188	2 / 3	2 / 461
GO:0072757	cellular response to camptothecin	BP	0.0012537	0.01188	2 / 3	2 / 461
GO:0010032	meiotic chromosome condensation	BP	0.0012537	0.01188	2 / 3	2 / 461
GO:0034421	post-translational protein acetylation	BP	0.0012537	0.01188	2 / 3	2 / 461
GO:0042585	germinal vesicle	CC	0.0012537	0.01188	2 / 3	2 / 461
GO:0033186	CAF-1 complex	CC	0.0012537	0.01188	2 / 3	2 / 461
GO:0010997	anaphase-promoting complex binding	MF	0.0012537	0.01188	2 / 3	2 / 461
GO:0016772	transferase activity, transferring phosphorus-containing groups	MF	0.001264	0.01188	23 / 555	24 / 461
GO:0000800	lateral element	CC	0.0012674	0.01188	3 / 11	3 / 461
GO:0090307	spindle assembly involved in mitosis	BP	0.0012674	0.01188	3 / 11	3 / 461
GO:0051290	protein heterotetramerization	BP	0.0012674	0.01188	3 / 11	3 / 461
GO:0005720	nuclear heterochromatin	CC	0.0013617	0.0127	4 / 24	4 / 461
GO:0007283	spermatogenesis	BP	0.0013769	0.012778	18 / 392	18 / 461
GO:0042802	identical protein binding	MF	0.0014263	0.01317	22 / 526	22 / 461
GO:0005815	microtubule organizing center	CC	0.0014445	0.013272	6 / 60	5 / 461
GO:0006468	protein phosphorylation	BP	0.0015366	0.014049	25 / 633	26 / 461
GO:0004519	endonuclease activity	MF	0.0016205	0.014743	7 / 83	7 / 461
GO:0006336	DNA replication-independent nucleosome assembly	BP	0.0016641	0.014993	3 / 12	3 / 461
GO:0016814	hydrolase activity, acting on carbon-nitrogen (but not peptide) bonds, in cyclic amidines	MF	0.0016641	0.014993	3 / 12	3 / 461
GO:0045931	positive regulation of mitotic cell cycle	BP	0.0018546	0.016613	4 / 26	4 / 461
GO:0051536	iron-sulfur cluster binding	MF	0.0018618	0.016613	6 / 63	6 / 461
GO:0016740	transferase activity	MF	0.0019713	0.017506	48 / 1518	49 / 461
GO:0031297	replication fork processing	BP	0.0021305	0.018652	3 / 13	3 / 461
GO:0001833	inner cell mass cell proliferation	BP	0.0021305	0.018652	3 / 13	3 / 461
GO:0006275	regulation of DNA replication	BP	0.0021305	0.018652	3 / 13	3 / 461
GO:0043234	protein complex	CC	0.0023095	0.020124	18 / 411	18 / 461
GO:0007131	reciprocal meiotic recombination	BP	0.002459	0.020133	4 / 28	4 / 461
GO:0016553	base conversion or substitution editing	BP	0.0024732	0.020133	2 / 4	2 / 461
GO:0030174	regulation of DNA-dependent DNA replication initiation	BP	0.0024732	0.020133	2 / 4	2 / 461
GO:0061564	axon development	BP	0.0024732	0.020133	2 / 4	2 / 461
GO:0006545	glycine biosynthetic process	BP	0.0024732	0.020133	2 / 4	2 / 461
GO:0031536	positive regulation of exit from mitosis	BP	0.0024732	0.020133	2 / 4	2 / 461
GO:0048478	replication fork protection	BP	0.0024732	0.020133	2 / 4	2 / 461
GO:0006273	lagging strand elongation	BP	0.0024732	0.020133	2 / 4	2 / 461
GO:0031618	nuclear pericentric heterochromatin	CC	0.0024732	0.020133	2 / 4	2 / 461
GO:1990086	lens fiber cell apoptotic process	BP	0.0024732	0.020133	2 / 4	2 / 461
GO:0046683	response to organophosphorus	BP	0.0024732	0.020133	2 / 4	2 / 461
GO:0098535	de novo centriole assembly	BP	0.0024732	0.020133	2 / 4	2 / 461
GO:0044770	cell cycle phase transition	BP	0.0024732	0.020133	2 / 4	2 / 461
GO:0007100	mitotic centrosome separation	BP	0.0024732	0.020133	2 / 4	2 / 461
GO:0003896	DNA primase activity	MF	0.0024732	0.020133	2 / 4	2 / 461
GO:0007095	mitotic G2 DNA damage checkpoint	BP	0.0026703	0.021643	3 / 14	3 / 461
GO:0000737	DNA catabolic process, endonucleolytic	BP	0.0027308	0.022036	5 / 47	5 / 461
GO:0016779	nucleotidyltransferase activity	MF	0.0027469	0.02207	7 / 91	7 / 461
GO:0000781	chromosome, telomeric region	CC	0.0032829	0.025853	5 / 49	5 / 461
GO:0010212	response to ionizing radiation	BP	0.0032829	0.025853	5 / 49	5 / 461
GO:0031100	organ regeneration	BP	0.0032829	0.025853	5 / 49	5 / 461
GO:0035371	microtubule plus-end	CC	0.0032873	0.025853	3 / 15	3 / 461
GO:0009168	purine ribonucleoside monophosphate biosynthetic process	BP	0.0032873	0.025853	3 / 15	3 / 461
GO:0051437	positive regulation of ubiquitin-protein ligase activity involved in mitotic cell cycle	BP	0.0034209	0.026762	6 / 71	6 / 461
GO:0006461	protein complex assembly	BP	0.0034317	0.026762	8 / 120	8 / 461
GO:0016301	kinase activity	MF	0.0036572	0.028401	25 / 676	26 / 461
GO:0009165	nucleotide biosynthetic process	BP	0.0039846	0.029478	3 / 16	3 / 461
GO:0007346	regulation of mitotic cell cycle	BP	0.0040482	0.029478	4 / 32	4 / 461
GO:0005828	kinetochore microtubule	CC	0.0040659	0.029478	2 / 5	2 / 461
GO:0071174	mitotic spindle checkpoint	BP	0.0040659	0.029478	2 / 5	2 / 461
GO:0033600	negative regulation of mammary gland epithelial cell proliferation	BP	0.0040659	0.029478	2 / 5	2 / 461
GO:0098536	deuterosome	CC	0.0040659	0.029478	2 / 5	2 / 461
GO:0005638	lamin filament	CC	0.0040659	0.029478	2 / 5	2 / 461
GO:0035174	histone serine kinase activity	MF	0.0040659	0.029478	2 / 5	3 / 461
GO:0006269	DNA replication, synthesis of RNA primer	BP	0.0040659	0.029478	2 / 5	2 / 461
GO:0070383	DNA cytosine deamination	BP	0.0040659	0.029478	2 / 5	2 / 461
GO:0043140	ATP-dependent 3'-5' DNA helicase activity	MF	0.0040659	0.029478	2 / 5	2 / 461
GO:0051488	activation of anaphase-promoting complex activity	BP	0.0040659	0.029478	2 / 5	2 / 461
GO:0009157	deoxyribonucleoside monophosphate biosynthetic process	BP	0.0040659	0.029478	2 / 5	2 / 461
GO:0006287	base-excision repair, gap-filling	BP	0.0040659	0.029478	2 / 5	2 / 461
GO:0008622	epsilon DNA polymerase complex	CC	0.0040659	0.029478	2 / 5	2 / 461
GO:0000212	meiotic spindle organization	BP	0.0040659	0.029478	2 / 5	2 / 461
GO:0017108	5'-flap endonuclease activity	MF	0.0040659	0.029478	2 / 5	2 / 461
GO:0090305	nucleic acid phosphodiester bond hydrolysis	BP	0.0046142	0.033323	8 / 126	8 / 461
GO:0004523	RNA-DNA hybrid ribonuclease activity	MF	0.0047652	0.033886	3 / 17	3 / 461
GO:0000132	establishment of mitotic spindle orientation	BP	0.0047652	0.033886	3 / 17	3 / 461
GO:0007141	male meiosis I	BP	0.0047652	0.033886	3 / 17	3 / 461
GO:0006164	purine nucleotide biosynthetic process	BP	0.0047652	0.033886	3 / 17	3 / 461
GO:0007098	centrosome cycle	BP	0.0060159	0.041353	2 / 6	2 / 461
GO:0000729	DNA double-strand break processing	BP	0.0060159	0.041353	2 / 6	2 / 461
GO:0043203	axon hillock	CC	0.0060159	0.041353	2 / 6	2 / 461
GO:0070087	chromo shadow domain binding	MF	0.0060159	0.041353	2 / 6	2 / 461
GO:0051573	negative regulation of histone H3-K9 methylation	BP	0.0060159	0.041353	2 / 6	2 / 461
GO:0045842	positive regulation of mitotic metaphase/anaphase transition	BP	0.0060159	0.041353	2 / 6	2 / 461
GO:0051103	DNA ligation involved in DNA repair	BP	0.0060159	0.041353	2 / 6	2 / 461
GO:0000808	origin recognition complex	CC	0.0060159	0.041353	2 / 6	2 / 461
GO:0090267	positive regulation of mitotic cell cycle spindle assembly checkpoint	BP	0.0060159	0.041353	2 / 6	2 / 461
GO:0004518	nuclease activity	MF	0.0060871	0.041688	8 / 132	8 / 461
GO:0006144	purine nucleobase metabolic process	BP	0.0062171	0.042422	4 / 36	4 / 461
GO:0010165	response to X-ray	BP	0.0065867	0.044293	3 / 19	3 / 461
GO:0005637	nuclear inner membrane	CC	0.0065867	0.044293	3 / 19	3 / 461
GO:0001673	male germ cell nucleus	CC	0.0065867	0.044293	3 / 19	3 / 461
GO:0006261	DNA-dependent DNA replication	BP	0.0065867	0.044293	3 / 19	3 / 461

## Sheet: Cluster_2+4_GO
GO ID	GO name	GO namespace	Exact p-value	Adjusted p-value	# genes / category	# genes / input
GO:0000278	mitotic cell cycle	BP	5.0689e-77	1.3407e-73	113 / 401	115 / 720
GO:0007049	cell cycle	BP	8.8407e-77	1.3407e-73	136 / 632	137 / 720
GO:0007067	mitotic nuclear division	BP	7.6172e-57	7.7009e-54	82 / 281	82 / 720
GO:0051301	cell division	BP	2.8561e-52	2.1657e-49	87 / 365	88 / 720
GO:0006260	DNA replication	BP	8.6845e-42	5.268e-39	54 / 157	55 / 720
GO:0000775	chromosome, centromeric region	CC	1.2683e-35	6.411e-33	45 / 127	46 / 720
GO:0005654	nucleoplasm	CC	1.4175e-34	6.1417e-32	117 / 1058	118 / 720
GO:0005694	chromosome	CC	2.8439e-31	1.0782e-28	63 / 337	64 / 720
GO:0005634	nucleus	CC	5.967e-28	2.0109e-25	319 / 6196	316 / 720
GO:0006271	DNA strand elongation involved in DNA replication	BP	6.9125e-27	2.0966e-24	22 / 31	23 / 720
GO:0000776	kinetochore	CC	9.953e-27	2.7443e-24	35 / 106	35 / 720
GO:0000082	G1/S transition of mitotic cell cycle	BP	5.4424e-24	1.3756e-21	38 / 152	38 / 720
GO:0007059	chromosome segregation	BP	5.7752e-21	1.3474e-18	26 / 74	26 / 720
GO:0006281	DNA repair	BP	2.0343e-19	4.4071e-17	50 / 354	49 / 720
GO:0005730	nucleolus	CC	7.6093e-17	1.5386e-14	115 / 1655	115 / 720
GO:0006974	cellular response to DNA damage stimulus	BP	3.6712e-16	6.9593e-14	49 / 407	49 / 720
GO:0006270	DNA replication initiation	BP	9.667e-16	1.7247e-13	14 / 24	15 / 720
GO:0005524	ATP binding	MF	7.4608e-15	1.2571e-12	103 / 1494	104 / 720
GO:0032201	telomere maintenance via semi-conservative replication	BP	8.3197e-15	1.3281e-12	13 / 22	13 / 720
GO:0005515	protein binding	MF	9.4207e-15	1.4287e-12	282 / 6231	281 / 720
GO:0034080	CENP-A containing nucleosome assembly	BP	1.8597e-14	2.6859e-12	13 / 23	13 / 720
GO:0005856	cytoskeleton	CC	2.5252e-14	3.4813e-12	84 / 1113	85 / 720
GO:0000070	mitotic sister chromatid segregation	BP	7.1374e-14	9.4121e-12	12 / 20	12 / 720
GO:0000722	telomere maintenance via recombination	BP	1.5518e-13	1.9611e-11	13 / 26	13 / 720
GO:0005819	spindle	CC	3.175e-13	3.8519e-11	19 / 71	19 / 720
GO:0005737	cytoplasm	CC	1.0781e-12	1.2576e-10	267 / 6006	268 / 720
GO:0051726	regulation of cell cycle	BP	1.4731e-12	1.6548e-10	25 / 141	25 / 720
GO:0000922	spindle pole	CC	2.7411e-12	2.9692e-10	17 / 61	17 / 720
GO:0005874	microtubule	CC	4.821e-12	5.0421e-10	37 / 318	36 / 720
GO:0005871	kinesin complex	CC	4.1736e-11	4.2195e-9	15 / 53	15 / 720
GO:0000086	G2/M transition of mitotic cell cycle	BP	5.0436e-11	4.9346e-9	23 / 139	23 / 720
GO:0008017	microtubule binding	MF	6.9091e-11	6.5486e-9	25 / 167	25 / 720
GO:0000723	telomere maintenance	BP	7.5028e-11	6.8957e-9	15 / 55	15 / 720
GO:0007018	microtubule-based movement	BP	1.0122e-10	9.0292e-9	17 / 75	17 / 720
GO:0006334	nucleosome assembly	BP	1.1725e-10	1.016e-8	18 / 86	19 / 720
GO:0005829	cytosol	CC	3.4839e-10	2.897e-8	133 / 2534	135 / 720
GO:0000083	regulation of transcription involved in G1/S transition of mitotic cell cycle	BP	3.5341e-10	2.897e-8	10 / 22	10 / 720
GO:0042555	MCM complex	CC	9.1014e-10	7.1374e-8	7 / 9	8 / 720
GO:0007076	mitotic chromosome condensation	BP	9.1777e-10	7.1374e-8	8 / 13	8 / 720
GO:0030261	chromosome condensation	BP	9.48e-10	7.1882e-8	9 / 18	9 / 720
GO:0000079	regulation of cyclin-dependent protein serine/threonine kinase activity	BP	1.1448e-9	8.4684e-8	14 / 56	14 / 720
GO:0000785	chromatin	CC	1.4384e-9	1.0388e-7	17 / 88	18 / 720
GO:0003777	microtubule motor activity	MF	1.7378e-9	1.2258e-7	16 / 78	16 / 720
GO:0005876	spindle microtubule	CC	2.4273e-9	1.6732e-7	11 / 33	11 / 720
GO:0005813	centrosome	CC	2.5243e-9	1.7014e-7	35 / 360	35 / 720
GO:0000166	nucleotide binding	MF	3.0869e-9	2.0353e-7	111 / 2055	112 / 720
GO:0030496	midbody	CC	3.5042e-9	2.2613e-7	17 / 93	18 / 720
GO:0003677	DNA binding	MF	3.9524e-9	2.4974e-7	120 / 2293	120 / 720
GO:0006297	nucleotide-excision repair, DNA gap filling	BP	8.6775e-9	5.3712e-7	9 / 22	9 / 720
GO:0000793	condensed chromosome	CC	8.9959e-9	5.4569e-7	10 / 29	10 / 720
GO:0051276	chromosome organization	BP	1.3121e-8	7.8032e-7	10 / 30	10 / 720
GO:0008283	cell proliferation	BP	1.7749e-8	1.0353e-06	34 / 370	36 / 720
GO:0003678	DNA helicase activity	MF	2.1576e-8	1.2347e-06	9 / 24	10 / 720
GO:0000796	condensin complex	CC	2.8252e-8	1.5868e-06	5 / 5	5 / 720
GO:0000724	double-strand break repair via homologous recombination	BP	3.6135e-8	1.9927e-06	13 / 61	13 / 720
GO:0007080	mitotic metaphase plate congression	BP	3.8918e-8	2.1078e-06	7 / 13	7 / 720
GO:0000940	condensed chromosome outer kinetochore	CC	6.7397e-8	3.5244e-06	6 / 9	6 / 720
GO:0000777	condensed chromosome kinetochore	CC	6.7397e-8	3.5244e-06	6 / 9	6 / 720
GO:0032508	DNA duplex unwinding	BP	9.0774e-8	4.6664e-06	11 / 45	12 / 720
GO:0071897	DNA biosynthetic process	BP	1.2505e-7	6.3212e-06	10 / 37	10 / 720
GO:0006200	ATP catabolic process	BP	1.2814e-7	6.3712e-06	30 / 327	30 / 720
GO:0006268	DNA unwinding involved in DNA replication	BP	1.6406e-7	8.0259e-06	6 / 10	7 / 720
GO:0004386	helicase activity	MF	4.2804e-7	2.0607e-05	18 / 142	18 / 720
GO:0000910	cytokinesis	BP	5.4426e-7	2.5793e-05	11 / 53	11 / 720
GO:0006302	double-strand break repair	BP	6.3719e-7	2.9732e-05	12 / 65	12 / 720
GO:0006310	DNA recombination	BP	8.3887e-7	3.855e-05	15 / 105	14 / 720
GO:0005658	alpha DNA polymerase:primase complex	CC	9.1682e-7	4.0893e-05	4 / 4	4 / 720
GO:0031262	Ndc80 complex	CC	9.1682e-7	4.0893e-05	4 / 4	4 / 720
GO:0034501	protein localization to kinetochore	BP	1.4636e-06	6.4335e-05	5 / 8	6 / 720
GO:0000228	nuclear chromosome	CC	3.4311e-06	0.00014867	8 / 31	8 / 720
GO:0015630	microtubule cytoskeleton	CC	4.1283e-06	0.00017635	16 / 134	17 / 720
GO:0007094	mitotic spindle assembly checkpoint	BP	4.4513e-06	0.00018751	8 / 32	8 / 720
GO:0071479	cellular response to ionizing radiation	BP	1.0494e-05	0.000436	7 / 26	7 / 720
GO:0051382	kinetochore assembly	BP	1.1172e-05	0.00045181	5 / 11	5 / 720
GO:0045120	pronucleus	CC	1.1172e-05	0.00045181	5 / 11	5 / 720
GO:0005657	replication fork	CC	1.1726e-05	0.00046796	6 / 18	6 / 720
GO:0016887	ATPase activity	MF	1.1886e-05	0.00046818	19 / 196	19 / 720
GO:0005663	DNA replication factor C complex	CC	1.3083e-05	0.00050872	4 / 6	4 / 720
GO:0042393	histone binding	MF	1.6558e-05	0.0006357	11 / 74	12 / 720
GO:0010369	chromocenter	CC	1.8664e-05	0.00070758	5 / 12	6 / 720
GO:0072686	mitotic spindle	CC	2.2964e-05	0.00085882	7 / 29	7 / 720
GO:0007088	regulation of mitosis	BP	2.3219e-05	0.00085882	6 / 20	6 / 720
GO:0019901	protein kinase binding	MF	2.5147e-05	0.00091894	26 / 341	26 / 720
GO:0007051	spindle organization	BP	2.9555e-05	0.00097619	5 / 13	5 / 720
GO:0051383	kinetochore organization	BP	2.9702e-05	0.00097619	3 / 3	3 / 720
GO:0047844	deoxycytidine deaminase activity	MF	2.9702e-05	0.00097619	3 / 3	3 / 720
GO:0043142	single-stranded DNA-dependent ATPase activity	MF	2.9702e-05	0.00097619	3 / 3	3 / 720
GO:0000942	condensed nuclear chromosome outer kinetochore	CC	2.9702e-05	0.00097619	3 / 3	3 / 720
GO:0097149	centralspindlin complex	CC	2.9702e-05	0.00097619	3 / 3	3 / 720
GO:0007019	microtubule depolymerization	BP	2.9776e-05	0.00097619	4 / 7	4 / 720
GO:0007091	metaphase/anaphase transition of mitotic cell cycle	BP	2.9776e-05	0.00097619	4 / 7	4 / 720
GO:0000076	DNA replication checkpoint	BP	2.9776e-05	0.00097619	4 / 7	4 / 720
GO:0019886	antigen processing and presentation of exogenous peptide antigen via MHC class II	BP	2.9933e-05	0.00097619	12 / 93	12 / 720
GO:0007052	mitotic spindle organization	BP	3.1657e-05	0.0010214	6 / 21	6 / 720
GO:0031145	anaphase-promoting complex-dependent proteasomal ubiquitin-dependent protein catabolic process	BP	3.5092e-05	0.0011204	11 / 80	12 / 720
GO:0032570	response to progesterone	BP	3.666e-05	0.0011463	7 / 31	7 / 720
GO:0004003	ATP-dependent DNA helicase activity	MF	3.666e-05	0.0011463	7 / 31	8 / 720
GO:0070301	cellular response to hydrogen peroxide	BP	3.8006e-05	0.0011763	8 / 42	8 / 720
GO:0000281	mitotic cytokinesis	BP	4.2392e-05	0.0012987	6 / 22	6 / 720
GO:0007093	mitotic cell cycle checkpoint	BP	4.5679e-05	0.0013854	7 / 32	7 / 720
GO:0007126	meiotic nuclear division	BP	5.5857e-05	0.0016774	6 / 23	6 / 720
GO:0051988	regulation of attachment of spindle microtubules to kinetochore	BP	5.8088e-05	0.0017105	4 / 8	4 / 720
GO:0008608	attachment of spindle microtubules to kinetochore	BP	5.8088e-05	0.0017105	4 / 8	5 / 720
GO:0006289	nucleotide-excision repair	BP	6.428e-05	0.0018746	10 / 71	10 / 720
GO:0071310	cellular response to organic substance	BP	8.4185e-05	0.0024088	7 / 35	8 / 720
GO:0000794	condensed nuclear chromosome	CC	8.4185e-05	0.0024088	7 / 35	7 / 720
GO:0006283	transcription-coupled nucleotide-excision repair	BP	8.8359e-05	0.0025046	8 / 47	8 / 720
GO:0003697	single-stranded DNA binding	MF	9.2028e-05	0.0025845	10 / 74	11 / 720
GO:0000780	condensed nuclear chromosome, centromeric region	CC	0.00010199	0.0028372	4 / 9	5 / 720
GO:0009612	response to mechanical stimulus	BP	0.0001029	0.0028372	9 / 61	9 / 720
GO:0003682	chromatin binding	MF	0.00011192	0.0029334	26 / 373	26 / 720
GO:0043515	kinetochore binding	MF	0.00011606	0.0029334	3 / 4	3 / 720
GO:0032133	chromosome passenger complex	CC	0.00011606	0.0029334	3 / 4	4 / 720
GO:0034508	centromere complex assembly	BP	0.00011606	0.0029334	3 / 4	3 / 720
GO:0043137	DNA replication, removal of RNA primer	BP	0.00011606	0.0029334	3 / 4	3 / 720
GO:0000778	condensed nuclear chromosome kinetochore	CC	0.00011606	0.0029334	3 / 4	3 / 720
GO:0008330	protein tyrosine/threonine phosphatase activity	MF	0.00011606	0.0029334	3 / 4	3 / 720
GO:0071459	protein localization to chromosome, centromeric region	BP	0.00011606	0.0029334	3 / 4	3 / 720
GO:0045132	meiotic chromosome segregation	BP	0.00011606	0.0029334	3 / 4	3 / 720
GO:0031577	spindle checkpoint	BP	0.00011606	0.0029334	3 / 4	4 / 720
GO:0001556	oocyte maturation	BP	0.00012817	0.0031865	5 / 17	5 / 720
GO:0008574	plus-end-directed microtubule motor activity	MF	0.00012817	0.0031865	5 / 17	5 / 720
GO:0042493	response to drug	BP	0.0001461	0.0036027	23 / 316	24 / 720
GO:0003690	double-stranded DNA binding	MF	0.00015644	0.0038265	11 / 94	11 / 720
GO:0006335	DNA replication-dependent nucleosome assembly	BP	0.00016582	0.0039914	4 / 10	4 / 720
GO:0000731	DNA synthesis involved in DNA repair	BP	0.00016582	0.0039914	4 / 10	4 / 720
GO:0051321	meiotic cell cycle	BP	0.00017862	0.0042658	10 / 80	10 / 720
GO:0005635	nuclear envelope	CC	0.00020258	0.0048003	12 / 113	12 / 720
GO:0043392	negative regulation of DNA binding	BP	0.00022435	0.0052749	6 / 29	6 / 720
GO:0000077	DNA damage checkpoint	BP	0.00027315	0.0060541	6 / 30	6 / 720
GO:0004674	protein serine/threonine kinase activity	MF	0.00027641	0.0060541	27 / 417	28 / 720
GO:0006259	DNA metabolic process	BP	0.00027991	0.0060541	7 / 42	7 / 720
GO:0060236	regulation of mitotic spindle organization	BP	0.00028344	0.0060541	3 / 5	3 / 720
GO:0010571	positive regulation of nuclear cell cycle DNA replication	BP	0.00028344	0.0060541	3 / 5	3 / 720
GO:0051256	mitotic spindle midzone assembly	BP	0.00028344	0.0060541	3 / 5	4 / 720
GO:0006312	mitotic recombination	BP	0.00028344	0.0060541	3 / 5	3 / 720
GO:0010216	maintenance of DNA methylation	BP	0.00028344	0.0060541	3 / 5	3 / 720
GO:0000779	condensed chromosome, centromeric region	CC	0.00028344	0.0060541	3 / 5	4 / 720
GO:0071168	protein localization to chromatin	BP	0.00028344	0.0060541	3 / 5	3 / 720
GO:2000107	negative regulation of leukocyte apoptotic process	BP	0.00028344	0.0060541	3 / 5	3 / 720
GO:0006269	DNA replication, synthesis of RNA primer	BP	0.00028344	0.0060541	3 / 5	3 / 720
GO:0009113	purine nucleobase biosynthetic process	BP	0.00028344	0.0060541	3 / 5	3 / 720
GO:0031572	G2 DNA damage checkpoint	BP	0.00029729	0.0063054	5 / 20	5 / 720
GO:0000790	nuclear chromatin	CC	0.0003193	0.0067252	13 / 136	13 / 720
GO:0003887	DNA-directed DNA polymerase activity	MF	0.00032991	0.0069008	6 / 31	6 / 720
GO:0004672	protein kinase activity	MF	0.00034733	0.0072154	32 / 537	33 / 720
GO:0006461	protein complex assembly	BP	0.00035532	0.0073313	12 / 120	12 / 720
GO:0019985	translesion synthesis	BP	0.00037194	0.0075712	4 / 12	4 / 720
GO:0010569	regulation of double-strand break repair via homologous recombination	BP	0.00037194	0.0075712	4 / 12	4 / 720
GO:0045429	positive regulation of nitric oxide biosynthetic process	BP	0.0003955	0.007997	6 / 32	6 / 720
GO:0006275	regulation of DNA replication	BP	0.00052412	0.010527	4 / 13	4 / 720
GO:0000405	bubble DNA binding	MF	0.0005538	0.010907	3 / 6	3 / 720
GO:0043009	chordate embryonic development	BP	0.0005538	0.010907	3 / 6	3 / 720
GO:0006189	'de novo' IMP biosynthetic process	BP	0.0005538	0.010907	3 / 6	3 / 720
GO:0006306	DNA methylation	BP	0.00059741	0.01169	5 / 23	5 / 720
GO:0016772	transferase activity, transferring phosphorus-containing groups	MF	0.00061111	0.011881	32 / 555	33 / 720
GO:0000226	microtubule cytoskeleton organization	BP	0.00061727	0.011925	9 / 77	9 / 720
GO:0045171	intercellular bridge	CC	0.00065472	0.012568	6 / 35	7 / 720
GO:0006978	DNA damage response, signal transduction by p53 class mediator resulting in transcription of p21 class mediator	BP	0.00071584	0.013655	4 / 14	4 / 720
GO:0006468	protein phosphorylation	BP	0.00073303	0.013895	35 / 633	36 / 720
GO:0051591	response to cAMP	BP	0.00083679	0.015764	7 / 50	7 / 720
GO:0070182	DNA polymerase binding	MF	0.00094682	0.016098	3 / 7	3 / 720
GO:0051983	regulation of chromosome segregation	BP	0.00094682	0.016098	3 / 7	4 / 720
GO:0071499	cellular response to laminar fluid shear stress	BP	0.00094682	0.016098	3 / 7	3 / 720
GO:0010529	negative regulation of transposition	BP	0.00094682	0.016098	3 / 7	3 / 720
GO:0036310	annealing helicase activity	MF	0.00094682	0.016098	3 / 7	3 / 720
GO:0051233	spindle midzone	CC	0.00095233	0.016098	4 / 15	4 / 720
GO:0017017	MAP kinase tyrosine/serine/threonine phosphatase activity	MF	0.00095233	0.016098	4 / 15	4 / 720
GO:0031436	BRCA1-BARD1 complex	CC	0.00096068	0.016098	2 / 2	2 / 720
GO:0015616	DNA translocase activity	MF	0.00096068	0.016098	2 / 2	2 / 720
GO:0046602	regulation of mitotic centrosome separation	BP	0.00096068	0.016098	2 / 2	2 / 720
GO:0007057	spindle assembly involved in female meiosis I	BP	0.00096068	0.016098	2 / 2	2 / 720
GO:0030892	mitotic cohesin complex	CC	0.00096068	0.016098	2 / 2	2 / 720
GO:0071409	cellular response to cycloheximide	BP	0.00096068	0.016098	2 / 2	2 / 720
GO:0002277	myeloid dendritic cell activation involved in immune response	BP	0.00096068	0.016098	2 / 2	2 / 720
GO:1901898	negative regulation of relaxation of cardiac muscle	BP	0.00096068	0.016098	2 / 2	2 / 720
GO:0040001	establishment of mitotic spindle localization	BP	0.00096068	0.016098	2 / 2	2 / 720
GO:0048256	flap endonuclease activity	MF	0.00096068	0.016098	2 / 2	2 / 720
GO:0000022	mitotic spindle elongation	BP	0.00096068	0.016098	2 / 2	2 / 720
GO:0072354	histone kinase activity (H3-T3 specific)	MF	0.00096068	0.016098	2 / 2	2 / 720
GO:0043146	spindle stabilization	BP	0.00096068	0.016098	2 / 2	3 / 720
GO:0006139	nucleobase-containing compound metabolic process	BP	0.0010655	0.017756	8 / 67	8 / 720
GO:0045931	positive regulation of mitotic cell cycle	BP	0.0010815	0.017925	5 / 26	5 / 720
GO:0043234	protein complex	CC	0.0011244	0.018535	25 / 411	25 / 720
GO:0051539	4 iron, 4 sulfur cluster binding	MF	0.001185	0.019428	6 / 39	6 / 720
GO:0001706	endoderm formation	BP	0.0012388	0.020201	4 / 16	4 / 720
GO:0032729	positive regulation of interferon-gamma production	BP	0.0013581	0.022028	6 / 40	6 / 720
GO:0085020	protein K6-linked ubiquitination	BP	0.0014801	0.02338	3 / 8	3 / 720
GO:0000733	DNA strand renaturation	BP	0.0014801	0.02338	3 / 8	3 / 720
GO:0030071	regulation of mitotic metaphase/anaphase transition	BP	0.0014801	0.02338	3 / 8	3 / 720
GO:0008064	regulation of actin polymerization or depolymerization	BP	0.0014801	0.02338	3 / 8	3 / 720
GO:0040020	regulation of meiosis	BP	0.0014801	0.02338	3 / 8	3 / 720
GO:0010628	positive regulation of gene expression	BP	0.0016412	0.025791	15 / 202	15 / 720
GO:0006284	base-excision repair	BP	0.0017615	0.027399	6 / 42	6 / 720
GO:0042542	response to hydrogen peroxide	BP	0.0017615	0.027399	6 / 42	6 / 720
GO:0000122	negative regulation of transcription from RNA polymerase II promoter	BP	0.0017726	0.027431	33 / 617	34 / 720
GO:0051225	spindle assembly	BP	0.0018085	0.027704	5 / 29	5 / 720
GO:0051297	centrosome organization	BP	0.0018085	0.027704	5 / 29	5 / 720
GO:0042102	positive regulation of T cell proliferation	BP	0.0018382	0.028016	7 / 57	7 / 720
GO:0032467	positive regulation of cytokinesis	BP	0.0021156	0.031924	5 / 30	6 / 720
GO:0000188	inactivation of MAPK activity	BP	0.0021156	0.031924	5 / 30	5 / 720
GO:0016538	cyclin-dependent protein serine/threonine kinase regulator activity	MF	0.0021691	0.032408	3 / 9	3 / 720
GO:0005664	nuclear origin of replication recognition complex	CC	0.0021691	0.032408	3 / 9	4 / 720
GO:0051439	regulation of ubiquitin-protein ligase activity involved in mitotic cell cycle	BP	0.0022213	0.033026	8 / 75	8 / 720
GO:0009416	response to light stimulus	BP	0.0024505	0.035857	4 / 19	4 / 720
GO:0006261	DNA-dependent DNA replication	BP	0.0024505	0.035857	4 / 19	4 / 720
GO:0010165	response to X-ray	BP	0.0024505	0.035857	4 / 19	4 / 720
GO:0034644	cellular response to UV	BP	0.002459	0.035857	5 / 31	6 / 720
GO:0005815	microtubule organizing center	CC	0.0024795	0.035982	7 / 60	6 / 720
GO:0014070	response to organic cyclic compound	BP	0.002576	0.037205	11 / 131	11 / 720
GO:0045893	positive regulation of transcription, DNA-templated	BP	0.0027466	0.037385	30 / 560	30 / 720
GO:0072711	cellular response to hydroxyurea	BP	0.0028226	0.037385	2 / 3	2 / 720
GO:0002693	positive regulation of cellular extravasation	BP	0.0028226	0.037385	2 / 3	2 / 720
GO:0009263	deoxyribonucleotide biosynthetic process	BP	0.0028226	0.037385	2 / 3	2 / 720
GO:0010032	meiotic chromosome condensation	BP	0.0028226	0.037385	2 / 3	2 / 720
GO:0033314	mitotic DNA replication checkpoint	BP	0.0028226	0.037385	2 / 3	2 / 720
GO:0031493	nucleosomal histone binding	MF	0.0028226	0.037385	2 / 3	2 / 720
GO:0042585	germinal vesicle	CC	0.0028226	0.037385	2 / 3	2 / 720
GO:2001181	positive regulation of interleukin-10 secretion	BP	0.0028226	0.037385	2 / 3	2 / 720
GO:0006565	L-serine catabolic process	BP	0.0028226	0.037385	2 / 3	2 / 720
GO:0034421	post-translational protein acetylation	BP	0.0028226	0.037385	2 / 3	2 / 720
GO:0071173	spindle assembly checkpoint	BP	0.0028226	0.037385	2 / 3	2 / 720
GO:0010997	anaphase-promoting complex binding	MF	0.0028226	0.037385	2 / 3	2 / 720
GO:0004666	prostaglandin-endoperoxide synthase activity	MF	0.0028226	0.037385	2 / 3	1 / 720
GO:0033186	CAF-1 complex	CC	0.0028226	0.037385	2 / 3	2 / 720
GO:0072757	cellular response to camptothecin	BP	0.0028226	0.037385	2 / 3	2 / 720
GO:0007127	meiosis I	BP	0.0028226	0.037385	2 / 3	2 / 720
GO:0004748	ribonucleoside-diphosphate reductase activity, thioredoxin disulfide as acceptor	MF	0.0028226	0.037385	2 / 3	2 / 720
GO:0007079	mitotic chromosome movement towards spindle pole	BP	0.0028226	0.037385	2 / 3	2 / 720
GO:0007346	regulation of mitotic cell cycle	BP	0.0028412	0.037392	5 / 32	5 / 720
GO:0055086	nucleobase-containing small molecule metabolic process	BP	0.0028478	0.037392	8 / 78	8 / 720
GO:0071356	cellular response to tumor necrosis factor	BP	0.0029942	0.039076	7 / 62	7 / 720
GO:0043394	proteoglycan binding	MF	0.0030276	0.039076	3 / 10	3 / 720
GO:0005721	pericentric heterochromatin	CC	0.0030276	0.039076	3 / 10	3 / 720
GO:0071872	cellular response to epinephrine stimulus	BP	0.0030276	0.039076	3 / 10	3 / 720
GO:0051536	iron-sulfur cluster binding	MF	0.0032804	0.041981	7 / 63	7 / 720
GO:0034097	response to cytokine	BP	0.0032804	0.041981	7 / 63	7 / 720
GO:0003684	damaged DNA binding	MF	0.0035869	0.045711	7 / 64	7 / 720
GO:0017048	Rho GTPase binding	MF	0.0037313	0.047154	5 / 34	5 / 720
GO:0032870	cellular response to hormone stimulus	BP	0.0037313	0.047154	5 / 34	5 / 720
GO:0031100	organ regeneration	BP	0.0039125	0.048662	6 / 49	6 / 720
GO:0010212	response to ionizing radiation	BP	0.0039125	0.048662	6 / 49	6 / 720
GO:0035690	cellular response to drug	BP	0.0039125	0.048662	6 / 49	6 / 720
GO:0008217	regulation of blood pressure	BP	0.0039148	0.048662	7 / 65	6 / 720
GO:0016301	kinase activity	MF	0.0040449	0.048764	34 / 676	35 / 720
GO:0008134	transcription factor binding	MF	0.0040574	0.048764	17 / 266	17 / 720
GO:0048715	negative regulation of oligodendrocyte differentiation	BP	0.0040677	0.048764	3 / 11	3 / 720
GO:0014075	response to amine	BP	0.0040677	0.048764	3 / 11	3 / 720
GO:0051290	protein heterotetramerization	BP	0.0040677	0.048764	3 / 11	3 / 720
GO:0090307	spindle assembly involved in mitosis	BP	0.0040677	0.048764	3 / 11	3 / 720
GO:2000406	positive regulation of T cell migration	BP	0.0040677	0.048764	3 / 11	3 / 720
GO:1901653	cellular response to peptide	BP	0.0040677	0.048764	3 / 11	3 / 720
GO:0000800	lateral element	CC	0.0040677	0.048764	3 / 11	3 / 720

## Sheet: Cluster_2+4_KEGG
KEGG pathway ID	KEGG pathway name	KEGG main category	Exact p-value	Adjusted p-value	# genes / category	# genes / input
4110	Cell cycle	Cellular Processes	5.7353e-22	1.1585e-19	34 / 124	34 / 676
3030	DNA replication	Genetic Information Processing	1.3874e-20	1.4013e-18	20 / 36	20 / 676
3460	Fanconi anemia pathway	Genetic Information Processing	1.9487e-8	1.3121e-06	13 / 53	13 / 676
4114	Oocyte meiosis	Cellular Processes	2.9489e-7	1.4892e-05	17 / 113	17 / 676
3440	Homologous recombination	Genetic Information Processing	3.269e-06	0.00013207	8 / 28	8 / 676
3430	Mismatch repair	Genetic Information Processing	8.653e-06	0.00029132	7 / 23	7 / 676
4914	Progesterone-mediated oocyte maturation	Organismal Systems	5.3024e-05	0.0015301	12 / 89	12 / 676
5166	HTLV-I infection	Human Diseases	9.9906e-05	0.0025118	22 / 261	22 / 676
3410	Base excision repair	Genetic Information Processing	0.00011191	0.0025118	7 / 33	7 / 676
3420	Nucleotide excision repair	Genetic Information Processing	0.0001865	0.0037673	8 / 47	8 / 676
230	Purine metabolism	Metabolism	0.00039196	0.0071979	16 / 176	16 / 676
5206	MicroRNAs in cancer	Human Diseases	0.00062419	0.010507	22 / 297	22 / 676

## Sheet: Cluster_3_GO
GO ID	GO name	GO namespace	Exact p-value	Adjusted p-value	# genes / category	# genes / input
GO:0005615	extracellular space	CC	3.0245e-7	0.00065057	39 / 1130	39 / 322
GO:0005244	voltage-gated ion channel activity	MF	2.8185e-06	0.0027094	12 / 157	12 / 322
GO:0034765	regulation of ion transmembrane transport	BP	3.9071e-06	0.0027094	12 / 162	12 / 322
GO:0016021	integral component of membrane	CC	5.0384e-06	0.0027094	109 / 5242	109 / 322
GO:0010634	positive regulation of epithelial cell migration	BP	1.2523e-05	0.0042849	5 / 22	5 / 322
GO:0007171	activation of transmembrane receptor protein tyrosine kinase activity	BP	1.2544e-05	0.0042849	4 / 11	4 / 322
GO:0007155	cell adhesion	BP	1.3944e-05	0.0042849	24 / 630	24 / 322
GO:0005887	integral component of plasma membrane	CC	2.7164e-05	0.0066231	33 / 1069	33 / 322
GO:0098639	collagen binding involved in cell-matrix adhesion	MF	2.8439e-05	0.0066231	3 / 5	3 / 322
GO:0016020	membrane	CC	3.0791e-05	0.0066231	144 / 7751	144 / 322
GO:0034380	high-density lipoprotein particle assembly	BP	5.6274e-05	0.011004	3 / 6	3 / 322
GO:0071805	potassium ion transmembrane transport	BP	6.1964e-05	0.011107	9 / 121	9 / 322
GO:0005576	extracellular region	CC	9.6447e-05	0.015958	52 / 2145	52 / 322
GO:0070371	ERK1 and ERK2 cascade	BP	0.00010747	0.016512	4 / 18	4 / 322
GO:0009986	cell surface	CC	0.0001216	0.017437	18 / 460	18 / 322
GO:0006813	potassium ion transport	BP	0.00013618	0.018308	9 / 134	9 / 322
GO:0005267	potassium channel activity	MF	0.0001611	0.018315	7 / 81	7 / 322
GO:0030198	extracellular matrix organization	BP	0.00017923	0.018315	14 / 313	14 / 322
GO:0007399	nervous system development	BP	0.00019535	0.018315	18 / 478	18 / 322
GO:0038064	collagen receptor activity	MF	0.00020435	0.018315	2 / 2	2 / 322
GO:0038065	collagen-activated signaling pathway	BP	0.00020435	0.018315	2 / 2	2 / 322
GO:0034188	apolipoprotein A-I receptor activity	MF	0.00020435	0.018315	2 / 2	2 / 322
GO:0060123	regulation of growth hormone secretion	BP	0.00020435	0.018315	2 / 2	2 / 322		8 intersection GO terms
GO:1902995	positive regulation of phospholipid efflux	BP	0.00020435	0.018315	2 / 2	2 / 322
GO:0007566	embryo implantation	BP	0.00022443	0.01931	5 / 39	5 / 322
GO:0050680	negative regulation of epithelial cell proliferation	BP	0.00023425	0.01938	6 / 61	6 / 322
GO:0005794	Golgi apparatus	CC	0.00027464	0.021879	31 / 1106	31 / 322
GO:0033344	cholesterol efflux	BP	0.00029395	0.022581	4 / 23	4 / 322
GO:0030173	integral component of Golgi membrane	CC	0.00035813	0.026564	5 / 43	5 / 322
GO:0030424	axon	CC	0.00039278	0.028162	10 / 188	10 / 322
GO:0033700	phospholipid efflux	BP	0.0004402	0.030544	3 / 11	3 / 322
GO:0008076	voltage-gated potassium channel complex	CC	0.00049689	0.0334	6 / 70	6 / 322
GO:0086004	regulation of cardiac muscle cell contraction	BP	0.00058073	0.033492	3 / 12	3 / 322
GO:0048333	mesodermal cell differentiation	BP	0.00058073	0.033492	3 / 12	3 / 322
GO:0008083	growth factor activity	MF	0.00058301	0.033492	9 / 163	9 / 322
GO:0019276	UDP-N-acetylgalactosamine metabolic process	BP	0.00060724	0.033492	2 / 3	2 / 322
GO:0005250	A-type (transient outward) potassium channel activity	MF	0.00060724	0.033492	2 / 3	2 / 322
GO:0045213	neurotransmitter receptor metabolic process	BP	0.00060724	0.033492	2 / 3	2 / 322
GO:0086001	cardiac muscle cell action potential	BP	0.00060724	0.033492	2 / 3	2 / 322
GO:0008305	integrin complex	CC	0.00064251	0.034551	4 / 28	4 / 322
GO:0045202	synapse	CC	0.00069038	0.03622	15 / 400	15 / 322
GO:0001540	beta-amyloid binding	MF	0.00073698	0.037366	4 / 29	4 / 322
GO:0010875	positive regulation of cholesterol efflux	BP	0.00074698	0.037366	3 / 13	3 / 322
GO:0014068	positive regulation of phosphatidylinositol 3-kinase signaling	BP	0.0007963	0.038928	5 / 51	5 / 322
GO:0048863	stem cell differentiation	BP	0.00084087	0.040194	4 / 30	4 / 322

## Sheet: Cluster_5_GO
GO ID	GO name	GO namespace	Exact p-value	Adjusted p-value	# genes / category	# genes / input
GO:0005576	extracellular region	CC	2.7325e-15	6.8421e-12	104 / 2145	105 / 488
GO:0005615	extracellular space	CC	8.6837e-14	1.0872e-10	67 / 1130	68 / 488
GO:0005578	proteinaceous extracellular matrix	CC	1.5985e-13	1.1696e-10	32 / 300	32 / 488
GO:0031012	extracellular matrix	CC	2.1954e-13	1.1696e-10	29 / 248	29 / 488
GO:0007155	cell adhesion	BP	2.3356e-13	1.1696e-10	47 / 630	46 / 488
GO:0030198	extracellular matrix organization	BP	5.1521e-13	2.1502e-10	32 / 313	33 / 488
GO:0005509	calcium ion binding	MF	3.6978e-9	1.3228e-06	42 / 698	42 / 488
GO:0005886	plasma membrane	CC	5.0115e-9	1.5686e-06	145 / 4266	144 / 488
GO:0007156	homophilic cell adhesion via plasma membrane adhesion molecules	BP	9.677e-8	2.6924e-05	16 / 142	16 / 488
GO:0007157	heterophilic cell-cell adhesion via plasma membrane cell adhesion molecules	BP	3.3783e-7	8.4592e-05	8 / 32	7 / 488
GO:0008201	heparin binding	MF	4.7126e-7	0.00010728	15 / 140	15 / 488
GO:0016021	integral component of membrane	CC	5.8663e-7	0.00012241	161 / 5242	158 / 488
GO:0070062	extracellular vesicular exosome	CC	1.0448e-06	0.00020124	96 / 2717	99 / 488
GO:0000786	nucleosome	CC	2.2062e-06	0.00039459	10 / 68	13 / 488
GO:0005201	extracellular matrix structural constituent	MF	2.8576e-06	0.00047703	9 / 55	9 / 488
GO:0022617	extracellular matrix disassembly	BP	8.7118e-06	0.0013634	12 / 115	13 / 488
GO:0070779	D-aspartate import	BP	1.055e-05	0.0013903	3 / 3	3 / 488
GO:0047086	ketosteroid monooxygenase activity	MF	1.055e-05	0.0013903	3 / 3	3 / 488
GO:0018636	phenanthrene 9,10-monooxygenase activity	MF	1.055e-05	0.0013903	3 / 3	3 / 488
GO:0017153	sodium:dicarboxylate symporter activity	MF	1.5027e-05	0.0018814	4 / 8	4 / 488
GO:0006805	xenobiotic metabolic process	BP	2.0936e-05	0.0023841	13 / 146	13 / 488
GO:0042060	wound healing	BP	2.0947e-05	0.0023841	10 / 87	10 / 488
GO:0030199	collagen fibril organization	BP	2.7812e-05	0.0030279	7 / 41	7 / 488
GO:0016020	membrane	CC	3.0233e-05	0.0031544	211 / 7751	209 / 488
GO:0047115	trans-1,2-dihydrobenzene-1,2-diol dehydrogenase activity	MF	4.1508e-05	0.0038495	3 / 4	3 / 488
GO:0071395	cellular response to jasmonic acid stimulus	BP	4.1508e-05	0.0038495	3 / 4	3 / 488
GO:0045916	negative regulation of complement activation	BP	4.1508e-05	0.0038495	3 / 4	3 / 488
GO:0006835	dicarboxylic acid transport	BP	4.3528e-05	0.0038927	4 / 10	4 / 488
GO:0005518	collagen binding	MF	5.4198e-05	0.0046797	8 / 61	9 / 488
GO:0043410	positive regulation of MAPK cascade	BP	5.8117e-05	0.0048509	9 / 79	9 / 488
GO:0004497	monooxygenase activity	MF	8.5918e-05	0.0068912	9 / 83	8 / 488
GO:0009986	cell surface	CC	9.036e-05	0.0068912	24 / 460	23 / 488
GO:0051781	positive regulation of cell division	BP	9.1357e-05	0.0068912	7 / 49	7 / 488
GO:0005313	L-glutamate transmembrane transporter activity	MF	9.9075e-05	0.0068912	4 / 12	4 / 488
GO:0030194	positive regulation of blood coagulation	BP	9.9075e-05	0.0068912	4 / 12	4 / 488
GO:0042340	keratan sulfate catabolic process	BP	9.9075e-05	0.0068912	4 / 12	4 / 488
GO:0032914	positive regulation of transforming growth factor beta1 production	BP	0.00010207	0.0069079	3 / 5	3 / 488
GO:0042383	sarcolemma	CC	0.00010703	0.0070527	8 / 67	8 / 488
GO:0030673	axolemma	CC	0.00014063	0.0090291	4 / 13	4 / 488
GO:0050840	extracellular matrix binding	MF	0.00015087	0.0094447	5 / 24	5 / 488
GO:0051938	L-glutamate import	BP	0.00020081	0.011694	3 / 6	3 / 488
GO:0010759	positive regulation of macrophage chemotaxis	BP	0.00020081	0.011694	3 / 6	3 / 488
GO:0004499	N,N-dimethylaniline monooxygenase activity	MF	0.00020081	0.011694	3 / 6	2 / 488
GO:0045202	synapse	CC	0.00022644	0.012887	21 / 400	21 / 488
GO:0042493	response to drug	BP	0.00023648	0.013159	18 / 316	18 / 488
GO:0015813	L-glutamate transport	BP	0.00025926	0.014113	4 / 15	4 / 488
GO:0016339	calcium-dependent cell-cell adhesion via plasma membrane cell adhesion molecules	BP	0.00032452	0.016332	5 / 28	5 / 488
GO:0030054	cell junction	CC	0.00033948	0.016332	29 / 660	29 / 488
GO:0006182	cGMP biosynthetic process	BP	0.00033971	0.016332	4 / 16	4 / 488
GO:0042448	progesterone metabolic process	BP	0.00034568	0.016332	3 / 7	3 / 488
GO:0004032	alditol:NADP+ 1-oxidoreductase activity	MF	0.00034568	0.016332	3 / 7	3 / 488
GO:0061072	iris morphogenesis	BP	0.00034568	0.016332	3 / 7	3 / 488
GO:0060137	maternal process involved in parturition	BP	0.00034568	0.016332	3 / 7	3 / 488
GO:2000379	positive regulation of reactive oxygen species metabolic process	BP	0.00038511	0.017858	5 / 29	5 / 488
GO:0002576	platelet degranulation	BP	0.00040413	0.018399	8 / 81	8 / 488
GO:0009887	organ morphogenesis	BP	0.00041622	0.018611	10 / 124	10 / 488
GO:0050806	positive regulation of synaptic transmission	BP	0.00043656	0.018864	4 / 17	4 / 488
GO:0015501	glutamate:sodium symporter activity	MF	0.00048215	0.018864	2 / 2	2 / 488
GO:0008074	guanylate cyclase complex, soluble	CC	0.00048215	0.018864	2 / 2	2 / 488
GO:0032414	positive regulation of ion transmembrane transporter activity	BP	0.00048215	0.018864	2 / 2	2 / 488
GO:2000098	negative regulation of smooth muscle cell-matrix adhesion	BP	0.00048215	0.018864	2 / 2	2 / 488
GO:0031711	bradykinin receptor binding	MF	0.00048215	0.018864	2 / 2	2 / 488
GO:0034694	response to prostaglandin	BP	0.00048215	0.018864	2 / 2	2 / 488
GO:0061325	cell proliferation involved in outflow tract morphogenesis	BP	0.00048215	0.018864	2 / 2	2 / 488
GO:0030334	regulation of cell migration	BP	0.00049811	0.019184	7 / 64	7 / 488
GO:0044598	doxorubicin metabolic process	BP	0.00054408	0.019184	3 / 8	3 / 488
GO:0044597	daunorubicin metabolic process	BP	0.00054408	0.019184	3 / 8	3 / 488
GO:0004022	alcohol dehydrogenase (NAD) activity	MF	0.00054408	0.019184	3 / 8	3 / 488
GO:0016655	oxidoreductase activity, acting on NAD(P)H, quinone or similar compound as acceptor	MF	0.00054408	0.019184	3 / 8	3 / 488
GO:0008046	axon guidance receptor activity	MF	0.00054408	0.019184	3 / 8	3 / 488
GO:0043202	lysosomal lumen	CC	0.00054784	0.019184	7 / 65	7 / 488
GO:0006693	prostaglandin metabolic process	BP	0.0005516	0.019184	4 / 18	4 / 488
GO:0007411	axon guidance	BP	0.00056682	0.019443	18 / 340	18 / 488
GO:0006811	ion transport	BP	0.00058899	0.01993	29 / 683	29 / 488
GO:0005796	Golgi lumen	CC	0.00060619	0.020239	8 / 86	8 / 488
GO:0042476	odontogenesis	BP	0.00061865	0.020383	5 / 32	5 / 488
GO:0002227	innate immune response in mucosa	BP	0.00068665	0.022329	4 / 19	4 / 488
GO:0016491	oxidoreductase activity	MF	0.00075824	0.024342	26 / 596	25 / 488
GO:0004872	receptor activity	MF	0.00081801	0.025491	15 / 265	15 / 488
GO:0005604	basement membrane	CC	0.00082077	0.025491	8 / 90	8 / 488
GO:0048813	dendrite morphogenesis	BP	0.00082458	0.025491	5 / 34	5 / 488
GO:0005102	receptor binding	MF	0.0010259	0.031329	18 / 358	18 / 488
GO:0002053	positive regulation of mesenchymal cell proliferation	BP	0.0010777	0.032512	5 / 36	5 / 488
GO:0045766	positive regulation of angiogenesis	BP	0.0010925	0.032567	8 / 94	8 / 488
GO:0030574	collagen catabolic process	BP	0.0011962	0.03524	7 / 74	8 / 488
GO:0005215	transporter activity	MF	0.0013228	0.036795	15 / 278	15 / 488
GO:0001525	angiogenesis	BP	0.0013724	0.036795	13 / 223	13 / 488
GO:0048306	calcium-dependent protein binding	MF	0.0013972	0.036795	6 / 56	6 / 488
GO:0002074	extraocular skeletal muscle development	BP	0.0014254	0.036795	2 / 3	2 / 488
GO:0047718	indanol dehydrogenase activity	MF	0.0014254	0.036795	2 / 3	2 / 488
GO:0030185	nitric oxide transport	BP	0.0014254	0.036795	2 / 3	2 / 488
GO:0047045	testosterone 17-beta-dehydrogenase (NADP+) activity	MF	0.0014254	0.036795	2 / 3	2 / 488
GO:0060492	lung induction	BP	0.0014254	0.036795	2 / 3	2 / 488
GO:0070052	collagen V binding	MF	0.0014254	0.036795	2 / 3	2 / 488
GO:0003253	cardiac neural crest cell migration involved in outflow tract morphogenesis	BP	0.0014254	0.036795	2 / 3	2 / 488
GO:0008282	ATP-sensitive potassium channel complex	CC	0.0014254	0.036795	2 / 3	2 / 488
GO:0005583	fibrillar collagen trimer	CC	0.0014254	0.036795	2 / 3	2 / 488
GO:0006069	ethanol oxidation	BP	0.0015261	0.038214	3 / 11	3 / 488
GO:0009268	response to pH	BP	0.0015261	0.038214	3 / 11	3 / 488
GO:2000353	positive regulation of endothelial cell apoptotic process	BP	0.0015261	0.038214	3 / 11	3 / 488
GO:0043025	neuronal cell body	CC	0.001689	0.041874	15 / 285	15 / 488
GO:0019229	regulation of vasoconstriction	BP	0.0017259	0.041959	4 / 24	4 / 488
GO:0019731	antibacterial humoral response	BP	0.0017259	0.041959	4 / 24	4 / 488
GO:0046982	protein heterodimerization activity	MF	0.0018303	0.044067	19 / 408	22 / 488
GO:0019838	growth factor binding	MF	0.0019583	0.046306	5 / 41	5 / 488
GO:0007275	multicellular organismal development	BP	0.0019602	0.046306	39 / 1091	39 / 488

## Sheet: Cluster_3+5_GO
GO ID	GO name	GO namespace	Exact p-value	Adjusted p-value	# genes / category	# genes / input
GO:0005615	extracellular space	CC	2.4593e-19	8.8241e-16	105 / 1130	107 / 810
GO:0005576	extracellular region	CC	3.9477e-18	7.0822e-15	156 / 2145	157 / 810
GO:0007155	cell adhesion	BP	1.3891e-17	1.6614e-14	71 / 630	70 / 810
GO:0030198	extracellular matrix organization	BP	4.956e-16	4.4455e-13	46 / 313	47 / 810
GO:0031012	extracellular matrix	CC	2.4131e-13	1.7316e-10	37 / 248	37 / 810
GO:0005578	proteinaceous extracellular matrix	CC	1.0756e-12	6.4318e-10	40 / 300	40 / 810
GO:0016021	integral component of membrane	CC	1.1775e-11	6.0355e-9	270 / 5242	267 / 810
GO:0005886	plasma membrane	CC	7.4e-11	3.3189e-8	227 / 4266	226 / 810
GO:0005509	calcium ion binding	MF	1.3575e-9	5.412e-7	59 / 698	59 / 810
GO:0016020	membrane	CC	4.1161e-9	1.4769e-06	355 / 7751	353 / 810
GO:0009986	cell surface	CC	4.1498e-8	1.3536e-05	42 / 460	41 / 810
GO:0070062	extracellular vesicular exosome	CC	7.6654e-8	2.292e-05	149 / 2717	153 / 810
GO:0007157	heterophilic cell-cell adhesion via plasma membrane cell adhesion molecules	BP	1.1497e-7	3.1732e-05	10 / 32	9 / 810
GO:0005518	collagen binding	MF	2.2005e-7	5.6396e-05	13 / 61	14 / 810
GO:0042060	wound healing	BP	4.9152e-7	0.00011757	15 / 87	15 / 810
GO:0045202	synapse	CC	5.5e-7	0.00012334	36 / 400	36 / 810
GO:0007156	homophilic cell adhesion via plasma membrane adhesion molecules	BP	9.2782e-7	0.00019583	19 / 142	19 / 810
GO:0005887	integral component of plasma membrane	CC	1.133e-06	0.00022584	70 / 1069	70 / 810
GO:0008201	heparin binding	MF	3.1976e-06	0.00060384	18 / 140	18 / 810
GO:0006813	potassium ion transport	BP	7.1609e-06	0.0012741	17 / 134	17 / 810
GO:0071805	potassium ion transmembrane transport	BP	7.752e-06	0.0012741	16 / 121	16 / 810
GO:0070324	thyroid hormone binding	MF	8.3163e-06	0.0012741	4 / 5	4 / 810
GO:0051781	positive regulation of cell division	BP	8.389e-06	0.0012741	10 / 49	10 / 810
GO:0030054	cell junction	CC	8.5227e-06	0.0012741	47 / 660	47 / 810
GO:0005102	receptor binding	MF	1.9456e-05	0.0027923	30 / 358	30 / 810
GO:0005201	extracellular matrix structural constituent	MF	2.4543e-05	0.003387	10 / 55	10 / 810
GO:0043410	positive regulation of MAPK cascade	BP	2.5892e-05	0.0033984	12 / 79	12 / 810
GO:0042383	sarcolemma	CC	2.6521e-05	0.0033984	11 / 67	11 / 810
GO:0007275	multicellular organismal development	BP	3.0195e-05	0.0036617	66 / 1091	66 / 810
GO:0000786	nucleosome	CC	3.0616e-05	0.0036617	11 / 68	15 / 810
GO:0002576	platelet degranulation	BP	3.3474e-05	0.0037533	12 / 81	12 / 810
GO:0005267	potassium channel activity	MF	3.3474e-05	0.0037533	12 / 81	12 / 810
GO:0008076	voltage-gated potassium channel complex	CC	4.0467e-05	0.0043999	11 / 70	11 / 810
GO:0070779	D-aspartate import	BP	4.7443e-05	0.0046976	3 / 3	3 / 810
GO:0047086	ketosteroid monooxygenase activity	MF	4.7443e-05	0.0046976	3 / 3	3 / 810
GO:0018636	phenanthrene 9,10-monooxygenase activity	MF	4.7443e-05	0.0046976	3 / 3	3 / 810
GO:0031093	platelet alpha granule lumen	CC	4.8443e-05	0.0046976	9 / 48	9 / 810
GO:0005244	voltage-gated ion channel activity	MF	5.7374e-05	0.0054173	17 / 157	17 / 810
GO:0014704	intercalated disc	CC	6.5042e-05	0.0059516	8 / 39	8 / 810
GO:0007268	synaptic transmission	BP	6.635e-05	0.0059516	31 / 401	31 / 810
GO:0022617	extracellular matrix disassembly	BP	7.1796e-05	0.006283	14 / 115	15 / 810
GO:0006805	xenobiotic metabolic process	BP	8.1412e-05	0.0069549	16 / 146	16 / 810
GO:0034765	regulation of ion transmembrane transport	BP	8.5076e-05	0.0070292	17 / 162	17 / 810
GO:0006811	ion transport	BP	8.62e-05	0.0070292	45 / 683	45 / 810
GO:0042493	response to drug	BP	9.2845e-05	0.007391	26 / 316	26 / 810
GO:0030199	collagen fibril organization	BP	9.4757e-05	0.007391	8 / 41	8 / 810
GO:0010634	positive regulation of epithelial cell migration	BP	0.00010075	0.007691	6 / 22	6 / 810
GO:0017153	sodium:dicarboxylate symporter activity	MF	0.00010667	0.0079404	4 / 8	4 / 810
GO:0043202	lysosomal lumen	CC	0.00010844	0.0079404	10 / 65	10 / 810
GO:0007411	axon guidance	BP	0.00012406	0.0089026	27 / 340	27 / 810
GO:0035813	regulation of renal sodium excretion	BP	0.00018463	0.012268	3 / 4	3 / 810
GO:0071395	cellular response to jasmonic acid stimulus	BP	0.00018463	0.012268	3 / 4	3 / 810
GO:0047115	trans-1,2-dihydrobenzene-1,2-diol dehydrogenase activity	MF	0.00018463	0.012268	3 / 4	3 / 810
GO:0045916	negative regulation of complement activation	BP	0.00018463	0.012268	3 / 4	3 / 810
GO:0004497	monooxygenase activity	MF	0.00019717	0.012863	11 / 83	10 / 810
GO:0043235	receptor complex	CC	0.00024988	0.01601	13 / 114	13 / 810
GO:0007263	nitric oxide mediated signal transduction	BP	0.00026554	0.016715	5 / 17	5 / 810
GO:0005178	integrin binding	MF	0.00029198	0.017693	12 / 101	11 / 810
GO:0008083	growth factor activity	MF	0.00029466	0.017693	16 / 163	16 / 810
GO:0005041	low-density lipoprotein receptor activity	MF	0.0003019	0.017693	4 / 10	4 / 810
GO:0006835	dicarboxylic acid transport	BP	0.0003019	0.017693	4 / 10	4 / 810
GO:0043025	neuronal cell body	CC	0.00030573	0.017693	23 / 285	23 / 810
GO:0070371	ERK1 and ERK2 cascade	BP	0.00035676	0.020297	5 / 18	5 / 810
GO:0051260	protein homooligomerization	BP	0.00036204	0.020297	16 / 166	16 / 810
GO:0032281	alpha-amino-3-hydroxy-5-methyl-4-isoxazolepropionic acid selective glutamate receptor complex	CC	0.00042258	0.02302	6 / 28	6 / 810
GO:0007566	embryo implantation	BP	0.00044612	0.02302	7 / 39	7 / 810
GO:0038027	apolipoprotein A-I-mediated signaling pathway	BP	0.00044911	0.02302	3 / 5	3 / 810
GO:0047035	testosterone dehydrogenase (NAD+) activity	MF	0.00044911	0.02302	3 / 5	3 / 810
GO:0098639	collagen binding involved in cell-matrix adhesion	MF	0.00044911	0.02302	3 / 5	3 / 810
GO:0032914	positive regulation of transforming growth factor beta1 production	BP	0.00044911	0.02302	3 / 5	3 / 810
GO:0007171	activation of transmembrane receptor protein tyrosine kinase activity	BP	0.00046084	0.023289	4 / 11	4 / 810
GO:0001525	angiogenesis	BP	0.00051327	0.02505	19 / 223	19 / 810
GO:0001540	beta-amyloid binding	MF	0.00051664	0.02505	6 / 29	6 / 810
GO:2000379	positive regulation of reactive oxygen species metabolic process	BP	0.00051664	0.02505	6 / 29	6 / 810
GO:0016491	oxidoreductase activity	MF	0.0005677	0.026855	38 / 596	37 / 810
GO:0009887	organ morphogenesis	BP	0.00056883	0.026855	13 / 124	13 / 810
GO:0007160	cell-matrix adhesion	BP	0.00058889	0.027441	11 / 94	11 / 810
GO:0032526	response to retinoic acid	BP	0.0005997	0.027586	8 / 53	8 / 810
GO:0019838	growth factor binding	MF	0.00061243	0.027815	7 / 41	7 / 810
GO:0048333	mesodermal cell differentiation	BP	0.00067149	0.028911	4 / 12	4 / 810
GO:0005313	L-glutamate transmembrane transporter activity	MF	0.00067149	0.028911	4 / 12	4 / 810
GO:0042340	keratan sulfate catabolic process	BP	0.00067149	0.028911	4 / 12	4 / 810
GO:0030194	positive regulation of blood coagulation	BP	0.00067149	0.028911	4 / 12	4 / 810
GO:0007399	nervous system development	BP	0.00067686	0.028911	32 / 478	32 / 810
GO:0004872	receptor activity	MF	0.00069648	0.0294	21 / 265	21 / 810
GO:0003081	regulation of systemic arterial blood pressure by renin-angiotensin	BP	0.00087399	0.03336	3 / 6	3 / 810
GO:0005372	water transmembrane transporter activity	MF	0.00087399	0.03336	3 / 6	3 / 810
GO:0004499	N,N-dimethylaniline monooxygenase activity	MF	0.00087399	0.03336	3 / 6	2 / 810
GO:0034380	high-density lipoprotein particle assembly	BP	0.00087399	0.03336	3 / 6	3 / 810
GO:0051938	L-glutamate import	BP	0.00087399	0.03336	3 / 6	3 / 810
GO:0001913	T cell mediated cytotoxicity	BP	0.00087399	0.03336	3 / 6	3 / 810
GO:1902430	negative regulation of beta-amyloid formation	BP	0.00087399	0.03336	3 / 6	3 / 810
GO:0006910	phagocytosis, recognition	BP	0.00087399	0.03336	3 / 6	3 / 810
GO:0010759	positive regulation of macrophage chemotaxis	BP	0.00087399	0.03336	3 / 6	3 / 810
GO:0042476	odontogenesis	BP	0.00089863	0.03394	6 / 32	6 / 810
GO:0030673	axolemma	CC	0.00094224	0.03453	4 / 13	4 / 810
GO:0031527	filopodium membrane	CC	0.00094224	0.03453	4 / 13	4 / 810
GO:0001666	response to hypoxia	BP	0.00094313	0.03453	15 / 164	15 / 810
GO:0043197	dendritic spine	CC	0.0010261	0.037188	9 / 71	9 / 810
GO:0071347	cellular response to interleukin-1	BP	0.0010651	0.037875	6 / 33	6 / 810
GO:0002020	protease binding	MF	0.0011357	0.037875	9 / 72	9 / 810
GO:0007596	blood coagulation	BP	0.0011884	0.037875	31 / 474	31 / 810
GO:0033344	cholesterol efflux	BP	0.0012057	0.037875	5 / 23	5 / 810
GO:0007416	synapse assembly	BP	0.0012468	0.037875	7 / 46	7 / 810
GO:0048813	dendrite morphogenesis	BP	0.0012542	0.037875	6 / 34	6 / 810
GO:0006898	receptor-mediated endocytosis	BP	0.0012692	0.037875	11 / 103	11 / 810
GO:0002019	regulation of renal output by angiotensin	BP	0.0013124	0.037875	2 / 2	2 / 810
GO:2000098	negative regulation of smooth muscle cell-matrix adhesion	BP	0.0013124	0.037875	2 / 2	2 / 810
GO:0032414	positive regulation of ion transmembrane transporter activity	BP	0.0013124	0.037875	2 / 2	2 / 810
GO:0060123	regulation of growth hormone secretion	BP	0.0013124	0.037875	2 / 2	2 / 810
GO:0050659	N-acetylgalactosamine 4-sulfate 6-O-sulfotransferase activity	MF	0.0013124	0.037875	2 / 2	2 / 810
GO:0034694	response to prostaglandin	BP	0.0013124	0.037875	2 / 2	2 / 810
GO:0031711	bradykinin receptor binding	MF	0.0013124	0.037875	2 / 2	2 / 810
GO:0015501	glutamate:sodium symporter activity	MF	0.0013124	0.037875	2 / 2	2 / 810
GO:0047006	17-alpha,20-alpha-dihydroxypregn-4-en-3-one dehydrogenase activity	MF	0.0013124	0.037875	2 / 2	2 / 810
GO:0061325	cell proliferation involved in outflow tract morphogenesis	BP	0.0013124	0.037875	2 / 2	2 / 810
GO:0015820	leucine transport	BP	0.0013124	0.037875	2 / 2	2 / 810
GO:0001869	negative regulation of complement activation, lectin pathway	BP	0.0013124	0.037875	2 / 2	2 / 810
GO:0060729	intestinal epithelial structure maintenance	BP	0.0013124	0.037875	2 / 2	2 / 810
GO:0008074	guanylate cyclase complex, soluble	CC	0.0013124	0.037875	2 / 2	2 / 810
GO:0034188	apolipoprotein A-I receptor activity	MF	0.0013124	0.037875	2 / 2	2 / 810
GO:1902995	positive regulation of phospholipid efflux	BP	0.0013124	0.037875	2 / 2	2 / 810
GO:0038064	collagen receptor activity	MF	0.0013124	0.037875	2 / 2	2 / 810
GO:0038065	collagen-activated signaling pathway	BP	0.0013124	0.037875	2 / 2	2 / 810
GO:0005216	ion channel activity	MF	0.0013195	0.037875	16 / 187	16 / 810
GO:0030424	axon	CC	0.0013951	0.039728	16 / 188	16 / 810
GO:0019229	regulation of vasoconstriction	BP	0.001478	0.039851	5 / 24	5 / 810
GO:0050840	extracellular matrix binding	MF	0.001478	0.039851	5 / 24	5 / 810
GO:0061072	iris morphogenesis	BP	0.0014883	0.039851	3 / 7	3 / 810
GO:0071223	cellular response to lipoteichoic acid	BP	0.0014883	0.039851	3 / 7	3 / 810
GO:0042448	progesterone metabolic process	BP	0.0014883	0.039851	3 / 7	3 / 810
GO:0004032	alditol:NADP+ 1-oxidoreductase activity	MF	0.0014883	0.039851	3 / 7	3 / 810
GO:0060137	maternal process involved in parturition	BP	0.0014883	0.039851	3 / 7	3 / 810
GO:0010873	positive regulation of cholesterol esterification	BP	0.0014883	0.039851	3 / 7	3 / 810
GO:0005604	basement membrane	CC	0.0015418	0.04079	10 / 90	10 / 810
GO:0050680	negative regulation of epithelial cell proliferation	BP	0.0015461	0.04079	8 / 61	8 / 810
GO:0043005	neuron projection	CC	0.001578	0.041329	19 / 245	19 / 810
GO:0050839	cell adhesion molecule binding	MF	0.0016113	0.04172	7 / 48	7 / 810
GO:0008237	metallopeptidase activity	MF	0.0016163	0.04172	15 / 173	15 / 810
GO:0007413	axonal fasciculation	BP	0.0016977	0.042271	4 / 15	4 / 810
GO:0015813	L-glutamate transport	BP	0.0016977	0.042271	4 / 15	4 / 810
GO:0030315	T-tubule	CC	0.0017083	0.042271	6 / 36	6 / 810
GO:0035249	synaptic transmission, glutamatergic	BP	0.0017083	0.042271	6 / 36	6 / 810
GO:0002053	positive regulation of mesenchymal cell proliferation	BP	0.0017083	0.042271	6 / 36	6 / 810
GO:0005251	delayed rectifier potassium channel activity	MF	0.0017083	0.042271	6 / 36	6 / 810
GO:0030204	chondroitin sulfate metabolic process	BP	0.0018221	0.044778	7 / 49	7 / 810
GO:0008016	regulation of heart contraction	BP	0.0019774	0.048264	6 / 37	6 / 810
GO:0045211	postsynaptic membrane	CC	0.0020336	0.048928	16 / 195	16 / 810
GO:0050679	positive regulation of epithelial cell proliferation	BP	0.0021136	0.048928	8 / 64	8 / 810
GO:0004175	endopeptidase activity	MF	0.0021136	0.048928	8 / 64	8 / 810
GO:0008284	positive regulation of cell proliferation	BP	0.0021162	0.048928	30 / 471	30 / 810
GO:0045766	positive regulation of angiogenesis	BP	0.0021421	0.048928	10 / 94	10 / 810
GO:0001968	fibronectin binding	MF	0.0021545	0.048928	5 / 26	6 / 810
GO:0001822	kidney development	BP	0.0021616	0.048928	11 / 110	11 / 810
GO:0002063	chondrocyte development	BP	0.0021993	0.048928	4 / 16	4 / 810
GO:0043691	reverse cholesterol transport	BP	0.0021993	0.048928	4 / 16	4 / 810
GO:0048598	embryonic morphogenesis	BP	0.0021993	0.048928	4 / 16	4 / 810
GO:0051482	positive regulation of cytosolic calcium ion concentration involved in phospholipase C-activating G-protein coupled signaling pathway	BP	0.0021993	0.048928	4 / 16	4 / 810
GO:0014032	neural crest cell development	BP	0.0021993	0.048928	4 / 16	4 / 810
GO:0006182	cGMP biosynthetic process	BP	0.0021993	0.048928	4 / 16	4 / 810
GO:0010811	positive regulation of cell-substrate adhesion	BP	0.0022773	0.048928	6 / 38	6 / 810
GO:0014068	positive regulation of phosphatidylinositol 3-kinase signaling	BP	0.0023073	0.048928	7 / 51	7 / 810
GO:1901381	positive regulation of potassium ion transmembrane transport	BP	0.0023173	0.048928	3 / 8	3 / 810
GO:0008046	axon guidance receptor activity	MF	0.0023173	0.048928	3 / 8	3 / 810
GO:0004022	alcohol dehydrogenase (NAD) activity	MF	0.0023173	0.048928	3 / 8	3 / 810
GO:0044598	doxorubicin metabolic process	BP	0.0023173	0.048928	3 / 8	3 / 810
GO:0016655	oxidoreductase activity, acting on NAD(P)H, quinone or similar compound as acceptor	MF	0.0023173	0.048928	3 / 8	3 / 810
GO:0060907	positive regulation of macrophage cytokine production	BP	0.0023173	0.048928	3 / 8	3 / 810
GO:0044597	daunorubicin metabolic process	BP	0.0023173	0.048928	3 / 8	3 / 810
GO:0008584	male gonad development	BP	0.0023182	0.048928	10 / 95	10 / 810
GO:0005249	voltage-gated potassium channel activity	MF	0.0023353	0.049	8 / 65	8 / 810

## Sheet: Cluster_3+5_KEGG
KEGG pathway ID	KEGG pathway name	KEGG main category	Exact p-value	Adjusted p-value	# genes / category	# genes / input
4512	ECM-receptor interaction	Environmental Information Processing	4.8334e-05	0.01015	13 / 87	13 / 738
5322	Systemic lupus erythematosus	Human Diseases	0.00013203	0.013863	16 / 136	16 / 738
2010	ABC transporters	Environmental Information Processing	0.0003603	0.023369	8 / 44	8 / 738
4610	Complement and coagulation cascades	Organismal Systems	0.00046579	0.023369	10 / 69	10 / 738
4360	Axon guidance	Organismal Systems	0.00067535	0.023369	14 / 127	14 / 738
4510	Focal adhesion	Cellular Processes	0.00081875	0.023369	19 / 207	19 / 738
5412	Arrhythmogenic right ventricular cardiomyopathy (ARVC)	Human Diseases	0.00082108	0.023369	10 / 74	10 / 738
4640	Hematopoietic cell lineage	Organismal Systems	0.00089024	0.023369	11 / 88	11 / 738
5034	Alcoholism	Human Diseases	0.0011155	0.026028	17 / 180	17 / 738
982	Drug metabolism - cytochrome P450	Metabolism	0.0017264	0.036254	9 / 68	9 / 738
5410	Hypertrophic cardiomyopathy (HCM)	Human Diseases	0.0020081	0.038337	10 / 83	10 / 738
350	Tyrosine metabolism	Metabolism	0.0027159	0.047528	6 / 35	6 / 738
