# Supplementary material for: Similarities in Gene Expression Profiles during In Vitro Aging of Primary Human Embryonic Lung and Foreskin Fibroblasts
Source: Biomed Res Int. 2015 Aug 3;2015:731938. doi: 10.1155/2015/731938 (PMC4538583; doi:10.1155/2015/731938)
Supplement: Supplementary file 1 — Suppl. Figure 1: (A) Growth curve of MRC-5 and HFF fibroblasts derived from a single vial and maintained in culture as triplicates from an early PD until senescence at late PDs. Data points of all measurements are displayed (not the mean). PDs specified in the plot denoted the time points were the total RNA was collected and subjected to RNA-seq. Black line denotes MRC-5 and green denotes HFF (B) Percentage of SA-β Gal positive cells at different time points of their growth in culture in MRC-5 and HFF fibroblasts. Each curve is measured in triplicate, the mean value is displayed with error bar (± S.E). Red line denotes MRC-5 and black denotes HFF. Suppl. Figure 2: TreeMaps produced using REVIGO () summarizing: (A) 12 GO cellular component (CC) terms found for cluster 3. (B) 21 GO CC terms found for cluster 5. Both clusters contain up-regulated genes but exhibit differences between MRC-5 and HFF. Suppl. Figure 3: TreeMaps produced using REVIGO () summarizing: (A) 59 GO biological processes (BP) terms found for cluster 2. (B) 162 GO BP terms found for cluster 4. Both clusters contain down-regulated genes. Suppl. Figure 4: TreeMaps produced using REVIGO () summarizing 24 GO BP terms found for cluster 1. Suppl. Figure 5: Venn plots showing the number of detected significantly monotonically expression pattern. (A, B): up-/down-regulated in both MRC-5 and HFF. (C) up-regulated in MRC-5 and down-regulated in HFF. (D): vice versa of (C). Suppl. Figure 6: Functional association networks generated using (A) STRING DB and (B) Cognoscente including 23 genes found to be monotonically expressed across the five PD. (A) Only connections between four genes were found using STRING DB. Different line colors represent the types of evidence for the association, explained on the right. (B) Nodes outlined in red are the 23 input genes. There were no interactions found for PCDHB16. 19 intermediates were included by the tool. The edge colors indicate the type of interaction, as explained in [file 731938.f1.zip › mat.731938.v2/SupplTable4_Monotony_table_MRC5_HFF.xls]

## Sheet: monotony_table
ensembl_gene_id	external_gene_id	description	Spearman correlation MRC-5	P-value MRC-5	Spearman correlation HFF	P-value HFF
ENSG00000073536	NLE1	notchless homolog 1 (Drosophila) [Source:HGNC Symbol;Acc:19889]	-0.983	0.028	-0.964	0.0406667	monotonically down-regulated in both cell lines
ENSG00000101311	FERMT1	fermitin family member 1 [Source:HGNC Symbol;Acc:15889]	-0.962	0.042	-0.959	0.044
ENSG00000101935	AMMECR1	Alport syndrome, mental retardation, midface hypoplasia and elliptocytosis chromosomal region gene 1 [Source:HGNC Symbol;Acc:467]	-0.964	0.04	-0.965	0.04
ENSG00000108947	EFNB3	ephrin-B3 [Source:HGNC Symbol;Acc:3228]	-0.98	0.03	-0.982	0.0286667
ENSG00000123689	G0S2	G0/G1switch 2 [Source:HGNC Symbol;Acc:30229]	-0.955	0.0466667	-0.95	0.0488333
ENSG00000125247	TMTC4	transmembrane and tetratricopeptide repeat containing 4 [Source:HGNC Symbol;Acc:25904]	-0.982	0.0286667	-0.964	0.0406667
ENSG00000130720	FIBCD1	fibrinogen C domain containing 1 [Source:HGNC Symbol;Acc:25922]	-0.962	0.042	-1	0.0166667
ENSG00000136960	ENPP2	ectonucleotide pyrophosphatase/phosphodiesterase 2 [Source:HGNC Symbol;Acc:3357]	-1	0.0166667	-0.979	0.0306667
ENSG00000136997	MYC	v-myc myelocytomatosis viral oncogene homolog (avian) [Source:HGNC Symbol;Acc:7553]	-0.969	0.0373333	-0.994	0.0206667
ENSG00000164687	FABP5	fatty acid binding protein 5 (psoriasis-associated) [Source:HGNC Symbol;Acc:3560]	-0.961	0.0426667	-0.991	0.0226667
ENSG00000166825	ANPEP	alanyl (membrane) aminopeptidase [Source:HGNC Symbol;Acc:500]	-0.978	0.0313333	-0.968	0.038
ENSG00000176170	SPHK1	sphingosine kinase 1 [Source:HGNC Symbol;Acc:11240]	-0.96	0.0423333	-1	0.0166667
ENSG00000180353	HCLS1	hematopoietic cell-specific Lyn substrate 1 [Source:HGNC Symbol;Acc:4844]	-0.965	0.0396667	-0.984	0.0271667
ENSG00000241343	RPL36A	ribosomal protein L36a [Source:HGNC Symbol;Acc:10359]	-0.955	0.0466667	-0.97	0.0366667
ENSG00000092969	TGFB2	transforming growth factor, beta 2 [Source:HGNC Symbol;Acc:11768]	1	0.0166667	0.986	0.026	monotonically up-regulated in both cell lines
ENSG00000105971	CAV2	caveolin 2 [Source:HGNC Symbol;Acc:1528]	0.973	0.0346667	0.963	0.041
ENSG00000113583	C5orf15	chromosome 5 open reading frame 15 [Source:HGNC Symbol;Acc:20656]	0.984	0.0273333	0.96	0.0433333
ENSG00000150403	TMCO3	transmembrane and coiled-coil domains 3 [Source:HGNC Symbol;Acc:20329]	0.971	0.036	1	0.0166667
ENSG00000154122	ANKH	ankylosis, progressive homolog (mouse) [Source:HGNC Symbol;Acc:15492]	0.979	0.0306667	0.975	0.0333333
ENSG00000154736	ADAMTS5	ADAM metallopeptidase with thrombospondin type 1 motif, 5 [Source:HGNC Symbol;Acc:221]	0.976	0.0326667	1	0.0166667
ENSG00000169439	SDC2	syndecan 2 [Source:HGNC Symbol;Acc:10659]	0.977	0.032	0.96	0.0433333
ENSG00000196963	PCDHB16	protocadherin beta 16 [Source:HGNC Symbol;Acc:14546]	0.986	0.026	0.967	0.0386667
ENSG00000197324	LRP10	low density lipoprotein receptor-related protein 10 [Source:HGNC Symbol;Acc:14553]	0.955	0.0466667	0.969	0.0373333
ENSG00000000003	TSPAN6	tetraspanin 6 [Source:HGNC Symbol;Acc:11858]	0.54	0.414	0.899	0.0861667
ENSG00000000419	DPM1	dolichyl-phosphate mannosyltransferase polypeptide 1, catalytic subunit [Source:HGNC Symbol;Acc:3005]	-0.266	0.614	-0.447	0.466
ENSG00000000457	SCYL3	SCY1-like 3 (S. cerevisiae) [Source:HGNC Symbol;Acc:19285]	0.581	0.387833	-0.15	0.757833
ENSG00000000460	C1orf112	chromosome 1 open reading frame 112 [Source:HGNC Symbol;Acc:25565]	-0.549	0.401	-0.736	0.216333
ENSG00000000971	CFH	complement factor H [Source:HGNC Symbol;Acc:4883]	-0.257	0.745	1	0.0166667
ENSG00000001036	FUCA2	fucosidase, alpha-L- 2, plasma [Source:HGNC Symbol;Acc:4008]	-0.274	0.7045	0.222	0.79
ENSG00000001084	GCLC	glutamate-cysteine ligase, catalytic subunit [Source:HGNC Symbol;Acc:4311]	0.466	0.458333	0.814	0.147833
ENSG00000001167	NFYA	nuclear transcription factor Y, alpha [Source:HGNC Symbol;Acc:7804]	-0.651	0.295	-0.3	0.683333
ENSG00000001460	STPG1	sperm-tail PG-rich repeat containing 1 [Source:HGNC Symbol;Acc:28070]	-0.294	0.631	0.675	0.282667
ENSG00000001461	NIPAL3	NIPA-like domain containing 3 [Source:HGNC Symbol;Acc:25233]	0.816	0.161333	0.844	0.125333
ENSG00000001497	LAS1L	LAS1-like (S. cerevisiae) [Source:HGNC Symbol;Acc:25726]	-0.481	0.483667	-0.855	0.126667
ENSG00000001561	ENPP4	ectonucleotide pyrophosphatase/phosphodiesterase 4 (putative) [Source:HGNC Symbol;Acc:3359]	0.708	0.232333	1	0.0166667
ENSG00000001617	SEMA3F	sema domain, immunoglobulin domain (Ig), short basic domain, secreted, (semaphorin) 3F [Source:HGNC Symbol;Acc:10728]	0.697	0.274667	-0.937	0.0586667
ENSG00000001629	ANKIB1	ankyrin repeat and IBR domain containing 1 [Source:HGNC Symbol;Acc:22215]	-0.402	0.5605	-0.632	0.317
ENSG00000001630	CYP51A1	cytochrome P450, family 51, subfamily A, polypeptide 1 [Source:HGNC Symbol;Acc:2649]	-0.151	0.696	-0.317	0.668167
ENSG00000001631	KRIT1	KRIT1, ankyrin repeat containing [Source:HGNC Symbol;Acc:1573]	-0.136	0.582333	0.173	0.77
ENSG00000002016	RAD52	RAD52 homolog (S. cerevisiae) [Source:HGNC Symbol;Acc:9824]	-0.423	0.4875	0.245	0.733333
ENSG00000002330	BAD	BCL2-associated agonist of cell death [Source:HGNC Symbol;Acc:936]	0.768	0.19	0.634	0.3085
ENSG00000002549	LAP3	leucine aminopeptidase 3 [Source:HGNC Symbol;Acc:18449]	0.724	0.2225	-0.829	0.142333
ENSG00000002586	CD99	CD99 molecule [Source:HGNC Symbol;Acc:7082]	-0.173	0.693667	0.795	0.177667
ENSG00000002745	WNT16	wingless-type MMTV integration site family, member 16 [Source:HGNC Symbol;Acc:16267]	1	0.0166667	0.761	0.195667
ENSG00000002746	HECW1	HECT, C2 and WW domain containing E3 ubiquitin protein ligase 1 [Source:HGNC Symbol;Acc:22195]	0.901	0.0788333	0.883	0.101167
ENSG00000002822	MAD1L1	MAD1 mitotic arrest deficient-like 1 (yeast) [Source:HGNC Symbol;Acc:6762]	-0.407	0.577	-0.989	0.024
ENSG00000002834	LASP1	LIM and SH3 protein 1 [Source:HGNC Symbol;Acc:6513]	-0.5	0.45	-0.7	0.233333
ENSG00000002919	SNX11	sorting nexin 11 [Source:HGNC Symbol;Acc:14975]	0.26	0.609333	-0.809	0.1555
ENSG00000002933	TMEM176A	transmembrane protein 176A [Source:HGNC Symbol;Acc:24930]	0.126	0.906667	0.973	0.0346667
ENSG00000003056	M6PR	mannose-6-phosphate receptor (cation dependent) [Source:HGNC Symbol;Acc:6752]	-0.505	0.47	-0.685	0.259167
ENSG00000003096	KLHL13	kelch-like 13 (Drosophila) [Source:HGNC Symbol;Acc:22931]	-0.986	0.026	-0.612	0.336
ENSG00000003137	CYP26B1	cytochrome P450, family 26, subfamily B, polypeptide 1 [Source:HGNC Symbol;Acc:20581]	0.504	0.471833	0.675	0.2625
ENSG00000003147	ICA1	islet cell autoantigen 1, 69kDa [Source:HGNC Symbol;Acc:5343]	0.15	0.549667	-0.045	0.536
ENSG00000003249	DBNDD1	dysbindin (dystrobrevin binding protein 1) domain containing 1 [Source:HGNC Symbol;Acc:28455]	-0.678	0.2655	0.2	0.783333
ENSG00000003393	ALS2	amyotrophic lateral sclerosis 2 (juvenile) [Source:HGNC Symbol;Acc:443]	-0.655	0.285833	-0.794	0.167833
ENSG00000003400	CASP10	caspase 10, apoptosis-related cysteine peptidase [Source:HGNC Symbol;Acc:1500]	-0.655	0.314667	-0.611	0.337167
ENSG00000003402	CFLAR	CASP8 and FADD-like apoptosis regulator [Source:HGNC Symbol;Acc:1876]	0.455	0.519833	0.411	0.561833
ENSG00000003436	TFPI	tissue factor pathway inhibitor (lipoprotein-associated coagulation inhibitor) [Source:HGNC Symbol;Acc:11760]	0.1	0.95	0.757	0.197833
ENSG00000003509	C2orf56	chromosome 2 open reading frame 56 [Source:HGNC Symbol;Acc:28816]	0.44	0.5015	-0.29	0.697
ENSG00000003756	RBM5	RNA binding motif protein 5 [Source:HGNC Symbol;Acc:9902]	-0.037	0.677333	-0.637	0.321833
ENSG00000003987	MTMR7	myotubularin related protein 7 [Source:HGNC Symbol;Acc:7454]	-0.806	0.163167	-0.539	0.380333
ENSG00000004059	ARF5	ADP-ribosylation factor 5 [Source:HGNC Symbol;Acc:658]	-0.427	0.548	-0.861	0.114333
ENSG00000004139	SARM1	sterile alpha and TIR motif containing 1 [Source:HGNC Symbol;Acc:17074]	0.14	0.736	-0.775	0.190333
ENSG00000004142	POLDIP2	polymerase (DNA-directed), delta interacting protein 2 [Source:HGNC Symbol;Acc:23781]	-0.452	0.516833	-1	0.0166667
ENSG00000004399	PLXND1	plexin D1 [Source:HGNC Symbol;Acc:9107]	-0.456	0.449167	0.748	0.201833
ENSG00000004455	AK2	adenylate kinase 2 [Source:HGNC Symbol;Acc:362]	-0.551	0.4225	-0.929	0.064
ENSG00000004478	FKBP4	FK506 binding protein 4, 59kDa [Source:HGNC Symbol;Acc:3720]	-0.762	0.192833	-0.4	0.516667
ENSG00000004487	KDM1A	lysine (K)-specific demethylase 1A [Source:HGNC Symbol;Acc:29079]	-0.661	0.278833	-0.882	0.0968333
ENSG00000004534	RBM6	RNA binding motif protein 6 [Source:HGNC Symbol;Acc:9903]	-0.468	0.51	0.658	0.284833
ENSG00000004660	CAMKK1	calcium/calmodulin-dependent protein kinase kinase 1, alpha [Source:HGNC Symbol;Acc:1469]	0.589	0.37	-0.86	0.103333
ENSG00000004700	RECQL	RecQ protein-like (DNA helicase Q1-like) [Source:HGNC Symbol;Acc:9948]	0.21	0.783333	-0.844	0.127
ENSG00000004766	CCDC132	coiled-coil domain containing 132 [Source:HGNC Symbol;Acc:25956]	-0.449	0.4995	0.652	0.308667
ENSG00000004776	HSPB6	heat shock protein, alpha-crystallin-related, B6 [Source:HGNC Symbol;Acc:26511]	-0.287	0.610167	-0.669	0.284
ENSG00000004777	ARHGAP33	Rho GTPase activating protein 33 [Source:HGNC Symbol;Acc:23085]	-0.532	0.418	-0.822	0.153
ENSG00000004779	NDUFAB1	NADH dehydrogenase (ubiquinone) 1, alpha/beta subcomplex, 1, 8kDa [Source:HGNC Symbol;Acc:7694]	-0.054	0.684667	-0.026	0.777333
ENSG00000004838	ZMYND10	zinc finger, MYND-type containing 10 [Source:HGNC Symbol;Acc:19412]	-0.269	0.496833	0.031	0.766667
ENSG00000004846	ABCB5	ATP-binding cassette, sub-family B (MDR/TAP), member 5 [Source:HGNC Symbol;Acc:46]	-0.469	0.487167	-0.279	0.516167
ENSG00000004864	SLC25A13	solute carrier family 25 (aspartate/glutamate carrier), member 13 [Source:HGNC Symbol;Acc:10983]	-0.678	0.278167	-0.574	0.4
ENSG00000004866	ST7	suppression of tumorigenicity 7 [Source:HGNC Symbol;Acc:11351]	0.632	0.305833	0.692	0.2655
ENSG00000004897	CDC27	cell division cycle 27 homolog (S. cerevisiae) [Source:HGNC Symbol;Acc:1728]	0.123	0.793167	-0.81	0.1605
ENSG00000004961	HCCS	holocytochrome c synthase [Source:HGNC Symbol;Acc:4837]	0.383	0.5725	-0.25	0.645
ENSG00000004975	DVL2	dishevelled, dsh homolog 2 (Drosophila) [Source:HGNC Symbol;Acc:3086]	-0.47	0.469167	0.09	0.716
ENSG00000005007	UPF1	UPF1 regulator of nonsense transcripts homolog (yeast) [Source:HGNC Symbol;Acc:9962]	0.397	0.547333	-0.659	0.281167
ENSG00000005020	SKAP2	src kinase associated phosphoprotein 2 [Source:HGNC Symbol;Acc:15687]	0.037	0.9815	1	0.0166667
ENSG00000005022	SLC25A5	solute carrier family 25 (mitochondrial carrier; adenine nucleotide translocator), member 5 [Source:HGNC Symbol;Acc:10991]	-0.628	0.3525	-0.97	0.0366667
ENSG00000005059	CCDC109B	coiled-coil domain containing 109B [Source:HGNC Symbol;Acc:26076]	-1	0.0166667	-0.868	0.109333
ENSG00000005075	POLR2J	polymerase (RNA) II (DNA directed) polypeptide J, 13.3kDa [Source:HGNC Symbol;Acc:9197]	-0.208	0.565667	-0.26	0.716667
ENSG00000005100	DHX33	DEAH (Asp-Glu-Ala-His) box polypeptide 33 [Source:HGNC Symbol;Acc:16718]	-0.525	0.424833	-0.712	0.2355
ENSG00000005108	THSD7A	thrombospondin, type I, domain containing 7A [Source:HGNC Symbol;Acc:22207]	-0.115	0.604167	0.606	0.345833
ENSG00000005156	LIG3	ligase III, DNA, ATP-dependent [Source:HGNC Symbol;Acc:6600]	-0.626	0.319667	-0.901	0.0881667
ENSG00000005175	RPAP3	RNA polymerase II associated protein 3 [Source:HGNC Symbol;Acc:26151]	-0.456	0.451167	-0.543	0.439333
ENSG00000005187	ACSM3	acyl-CoA synthetase medium-chain family member 3 [Source:HGNC Symbol;Acc:10522]	-0.074	0.622	-0.23	0.762667
ENSG00000005189	AC004381.6	Putative RNA exonuclease NEF-sp [Source:UniProtKB/Swiss-Prot;Acc:Q96IC2]	-0.7	0.250333	-0.695	0.251
ENSG00000005194	CIAPIN1	cytokine induced apoptosis inhibitor 1 [Source:HGNC Symbol;Acc:28050]	0.176	0.6445	-0.858	0.119667
ENSG00000005206	SPPL2B	signal peptide peptidase like 2B [Source:HGNC Symbol;Acc:30627]	-0.136	0.6255	-0.525	0.426333
ENSG00000005238	FAM214B	family with sequence similarity 214, member B [Source:HGNC Symbol;Acc:25666]	0.587	0.361833	0.578	0.372833
ENSG00000005243	COPZ2	coatomer protein complex, subunit zeta 2 [Source:HGNC Symbol;Acc:19356]	0.775	0.175667	0.735	0.2225
ENSG00000005249	PRKAR2B	protein kinase, cAMP-dependent, regulatory, type II, beta [Source:HGNC Symbol;Acc:9392]	0.678	0.259	-0.495	0.4635
ENSG00000005302	MSL3	male-specific lethal 3 homolog (Drosophila) [Source:HGNC Symbol;Acc:7370]	-0.136	0.875833	-0.844	0.125333
ENSG00000005339	CREBBP	CREB binding protein [Source:HGNC Symbol;Acc:2348]	-0.471	0.456333	-0.749	0.214667
ENSG00000005379	BZRAP1	benzodiazapine receptor (peripheral) associated protein 1 [Source:HGNC Symbol;Acc:16831]	-0.9	0.0833333	-0.088	0.9455
ENSG00000005436	GCFC2	GC-rich sequence DNA-binding factor 2 [Source:HGNC Symbol;Acc:1317]	-0.337	0.6305	-0.781	0.176333
ENSG00000005448	WDR54	WD repeat domain 54 [Source:HGNC Symbol;Acc:25770]	0.374	0.604667	-0.719	0.228833
ENSG00000005469	CROT	carnitine O-octanoyltransferase [Source:HGNC Symbol;Acc:2366]	0.434	0.496167	-0.008	0.827333
ENSG00000005471	ABCB4	ATP-binding cassette, sub-family B (MDR/TAP), member 4 [Source:HGNC Symbol;Acc:45]	0.501	0.441167	1	0.0166667
ENSG00000005483	MLL5	myeloid/lymphoid or mixed-lineage leukemia 5 (trithorax homolog, Drosophila) [Source:HGNC Symbol;Acc:18541]	0.003	0.647333	-0.174	0.691
ENSG00000005486	RHBDD2	rhomboid domain containing 2 [Source:HGNC Symbol;Acc:23082]	0.825	0.144333	0.948	0.0505
ENSG00000005513	SOX8	SRY (sex determining region Y)-box 8 [Source:HGNC Symbol;Acc:11203]	0.806	0.161333	-0.057	0.654667
ENSG00000005700	IBTK	inhibitor of Bruton agammaglobulinemia tyrosine kinase [Source:HGNC Symbol;Acc:17853]	-0.492	0.477	-0.294	0.697333
ENSG00000005801	ZNF195	zinc finger protein 195 [Source:HGNC Symbol;Acc:12986]	-0.681	0.283	-0.541	0.410167
ENSG00000005810	MYCBP2	MYC binding protein 2, E3 ubiquitin protein ligase [Source:HGNC Symbol;Acc:23386]	0.401	0.521167	-0.211	0.6455
ENSG00000005812	FBXL3	F-box and leucine-rich repeat protein 3 [Source:HGNC Symbol;Acc:13599]	0.642	0.3305	0.66	0.28
ENSG00000005844	ITGAL	integrin, alpha L (antigen CD11A (p180), lymphocyte function-associated antigen 1; alpha polypeptide) [Source:HGNC Symbol;Acc:6148]	-0.523	0.438167	0.103	0.600667
ENSG00000005882	PDK2	pyruvate dehydrogenase kinase, isozyme 2 [Source:HGNC Symbol;Acc:8810]	0.725	0.227833	0.185	0.733833
ENSG00000005884	ITGA3	integrin, alpha 3 (antigen CD49C, alpha 3 subunit of VLA-3 receptor) [Source:HGNC Symbol;Acc:6139]	0.3	0.683333	-0.669	0.2695
ENSG00000005889	ZFX	zinc finger protein, X-linked [Source:HGNC Symbol;Acc:12869]	-0.042	0.801833	-0.693	0.270333
ENSG00000005893	LAMP2	lysosomal-associated membrane protein 2 [Source:HGNC Symbol;Acc:6501]	0.57	0.382	0.537	0.404333
ENSG00000005955	GGNBP2	gametogenetin binding protein 2 [Source:HGNC Symbol;Acc:19357]	-0.462	0.450333	-0.483	0.471667
ENSG00000005961	ITGA2B	integrin, alpha 2b (platelet glycoprotein IIb of IIb/IIIa complex, antigen CD41) [Source:HGNC Symbol;Acc:6138]	-0.183	0.726667	-0.009	0.788167
ENSG00000005981	ASB4	ankyrin repeat and SOCS box containing 4 [Source:HGNC Symbol;Acc:16009]	-0.115	0.685	0.139	0.6255
ENSG00000006007	GDE1	glycerophosphodiester phosphodiesterase 1 [Source:HGNC Symbol;Acc:29644]	0.63	0.315	0.868	0.109167
ENSG00000006015	C19orf60	chromosome 19 open reading frame 60 [Source:HGNC Symbol;Acc:26098]	0.151	0.5755	-0.221	0.776167
ENSG00000006016	CRLF1	cytokine receptor-like factor 1 [Source:HGNC Symbol;Acc:2364]	-0.474	0.471333	-0.41	0.559
ENSG00000006025	OSBPL7	oxysterol binding protein-like 7 [Source:HGNC Symbol;Acc:16387]	-0.804	0.162333	-0.525	0.430667
ENSG00000006042	TMEM98	transmembrane protein 98 [Source:HGNC Symbol;Acc:24529]	0.578	0.369167	0.897	0.0943333
ENSG00000006062	MAP3K14	mitogen-activated protein kinase kinase kinase 14 [Source:HGNC Symbol;Acc:6853]	-0.452	0.5155	-0.877	0.1055
ENSG00000006114	SYNRG	synergin, gamma [Source:HGNC Symbol;Acc:557]	0.317	0.668	-0.624	0.322
ENSG00000006118	TMEM132A	transmembrane protein 132A [Source:HGNC Symbol;Acc:31092]	-0.428	0.538333	-0.842	0.112333
ENSG00000006125	AP2B1	adaptor-related protein complex 2, beta 1 subunit [Source:HGNC Symbol;Acc:563]	0.174	0.8295	-0.273	0.674667
ENSG00000006194	ZNF263	zinc finger protein 263 [Source:HGNC Symbol;Acc:13056]	0.146	0.755167	-0.6	0.373333
ENSG00000006210	CX3CL1	chemokine (C-X3-C motif) ligand 1 [Source:HGNC Symbol;Acc:10647]	0.617	0.335167	0.232	0.750667
ENSG00000006282	SPATA20	spermatogenesis associated 20 [Source:HGNC Symbol;Acc:26125]	0.67	0.268333	-0.37	0.566667
ENSG00000006283	CACNA1G	calcium channel, voltage-dependent, T type, alpha 1G subunit [Source:HGNC Symbol;Acc:1394]	0.181	0.756833	0.781	0.180833
ENSG00000006327	TNFRSF12A	tumor necrosis factor receptor superfamily, member 12A [Source:HGNC Symbol;Acc:18152]	-0.458	0.484667	-0.638	0.31
ENSG00000006432	MAP3K9	mitogen-activated protein kinase kinase kinase 9 [Source:HGNC Symbol;Acc:6861]	-0.708	0.2415	0.305	0.666667
ENSG00000006451	RALA	v-ral simian leukemia viral oncogene homolog A (ras related) [Source:HGNC Symbol;Acc:9839]	-0.968	0.038	-0.518	0.422667
ENSG00000006453	BAIAP2L1	BAI1-associated protein 2-like 1 [Source:HGNC Symbol;Acc:21649]	0.533	0.413333	-0.162	0.741167
ENSG00000006459	JHDM1D	jumonji C domain containing histone demethylase 1 homolog D (S. cerevisiae) [Source:HGNC Symbol;Acc:22224]	0.07	0.857	-0.217	0.782333
ENSG00000006468	ETV1	ets variant 1 [Source:HGNC Symbol;Acc:3490]	0.092	0.930667	-0.04	0.98
ENSG00000006530	AGK	acylglycerol kinase [Source:HGNC Symbol;Acc:21869]	-0.901	0.0881667	-0.824	0.148833
ENSG00000006534	ALDH3B1	aldehyde dehydrogenase 3 family, member B1 [Source:HGNC Symbol;Acc:410]	0.462	0.4995	0.4	0.516667
ENSG00000006555	TTC22	tetratricopeptide repeat domain 22 [Source:HGNC Symbol;Acc:26067]	-0.246	0.486667	0.064	0.610833
ENSG00000006576	PHTF2	putative homeodomain transcription factor 2 [Source:HGNC Symbol;Acc:13411]	-0.453	0.5195	0.702	0.241
ENSG00000006607	FARP2	FERM, RhoGEF and pleckstrin domain protein 2 [Source:HGNC Symbol;Acc:16460]	0.351	0.629	0.277	0.588833
ENSG00000006625	GGCT	gamma-glutamylcyclotransferase [Source:HGNC Symbol;Acc:21705]	-0.402	0.575667	-0.859	0.116
ENSG00000006634	DBF4	DBF4 homolog (S. cerevisiae) [Source:HGNC Symbol;Acc:17364]	-0.737	0.225167	-1	0.0166667
ENSG00000006638	TBXA2R	thromboxane A2 receptor [Source:HGNC Symbol;Acc:11608]	-0.473	0.414167	-0.615	0.333
ENSG00000006652	IFRD1	interferon-related developmental regulator 1 [Source:HGNC Symbol;Acc:5456]	0.811	0.127833	0.573	0.393333
ENSG00000006695	COX10	COX10 homolog, cytochrome c oxidase assembly protein, heme A: farnesyltransferase (yeast) [Source:HGNC Symbol;Acc:2260]	-0.706	0.244667	-0.924	0.0673333
ENSG00000006704	GTF2IRD1	GTF2I repeat domain containing 1 [Source:HGNC Symbol;Acc:4661]	-0.71	0.231833	-0.168	0.843333
ENSG00000006712	PAF1	Paf1, RNA polymerase II associated factor, homolog (S. cerevisiae) [Source:HGNC Symbol;Acc:25459]	0.125	0.795	-0.546	0.393167
ENSG00000006715	VPS41	vacuolar protein sorting 41 homolog (S. cerevisiae) [Source:HGNC Symbol;Acc:12713]	0.408	0.568833	0.824	0.140333
ENSG00000006740	ARHGAP44	Rho GTPase activating protein 44 [Source:HGNC Symbol;Acc:29096]	-0.002	0.9165	-0.631	0.313833
ENSG00000006744	ELAC2	elaC homolog 2 (E. coli) [Source:HGNC Symbol;Acc:14198]	0.146	0.823167	-0.759	0.200167
ENSG00000006747	SCIN	scinderin [Source:HGNC Symbol;Acc:21695]	0.707	0.241	0.2	0.783333
ENSG00000006756	ARSD	arylsulfatase D [Source:HGNC Symbol;Acc:717]	0.497	0.457167	0.111	0.756667
ENSG00000006757	PNPLA4	patatin-like phospholipase domain containing 4 [Source:HGNC Symbol;Acc:24887]	-0.869	0.105167	-0.897	0.0851667
ENSG00000006831	ADIPOR2	adiponectin receptor 2 [Source:HGNC Symbol;Acc:24041]	-0.783	0.180167	-0.521	0.445333
ENSG00000006837	CDKL3	cyclin-dependent kinase-like 3 [Source:HGNC Symbol;Acc:15483]	0.49	0.462	0.896	0.0883333
ENSG00000007047	MARK4	MAP/microtubule affinity-regulating kinase 4 [Source:HGNC Symbol;Acc:13538]	0.659	0.2975	-0.15	0.735
ENSG00000007080	CCDC124	coiled-coil domain containing 124 [Source:HGNC Symbol;Acc:25171]	-0.452	0.5225	-0.865	0.1115
ENSG00000007168	PAFAH1B1	platelet-activating factor acetylhydrolase 1b, regulatory subunit 1 (45kDa) [Source:HGNC Symbol;Acc:8574]	0.551	0.404333	0.841	0.133167
ENSG00000007202	KIAA0100	KIAA0100 [Source:HGNC Symbol;Acc:28960]	0.113	0.9005	-0.614	0.337667
ENSG00000007237	GAS7	growth arrest-specific 7 [Source:HGNC Symbol;Acc:4169]	-0.895	0.0833333	0.252	0.712
ENSG00000007255	TRAPPC6A	trafficking protein particle complex 6A [Source:HGNC Symbol;Acc:23069]	0.536	0.413833	0.332	0.647833
ENSG00000007341	ST7L	suppression of tumorigenicity 7 like [Source:HGNC Symbol;Acc:18441]	0.66	0.28	0.967	0.0386667
ENSG00000007372	PAX6	paired box 6 [Source:HGNC Symbol;Acc:8620]	-0.449	0.499333	-0.206	0.793833
ENSG00000007376	RPUSD1	RNA pseudouridylate synthase domain containing 1 [Source:HGNC Symbol;Acc:14173]	0.165	0.641	-0.931	0.0615
ENSG00000007384	RHBDF1	rhomboid 5 homolog 1 (Drosophila) [Source:HGNC Symbol;Acc:20561]	0.492	0.4665	0.56	0.398833
ENSG00000007392	LUC7L	LUC7-like (S. cerevisiae) [Source:HGNC Symbol;Acc:6723]	-0.439	0.507667	-0.59	0.360833
ENSG00000007402	CACNA2D2	calcium channel, voltage-dependent, alpha 2/delta subunit 2 [Source:HGNC Symbol;Acc:1400]	-0.011	0.598333	0.448	0.537333
ENSG00000007516	BAIAP3	BAI1-associated protein 3 [Source:HGNC Symbol;Acc:948]	0.523	0.405333	-0.37	0.5595
ENSG00000007520	TSR3	TSR3, 20S rRNA accumulation, homolog (S. cerevisiae) [Source:HGNC Symbol;Acc:14175]	-0.11	0.616333	-0.782	0.176167
ENSG00000007541	PIGQ	phosphatidylinositol glycan anchor biosynthesis, class Q [Source:HGNC Symbol;Acc:14135]	0.575	0.390333	-0.122	0.840333
ENSG00000007545	CRAMP1L	Crm, cramped-like (Drosophila) [Source:HGNC Symbol;Acc:14122]	-0.434	0.521833	-0.294	0.5175
ENSG00000007866	TEAD3	TEA domain family member 3 [Source:HGNC Symbol;Acc:11716]	-0.445	0.5115	-0.854	0.123333
ENSG00000007923	DNAJC11	DnaJ (Hsp40) homolog, subfamily C, member 11 [Source:HGNC Symbol;Acc:25570]	-0.554	0.395333	-0.901	0.0881667
ENSG00000007933	FMO3	flavin containing monooxygenase 3 [Source:HGNC Symbol;Acc:3771]	-0.842	0.129167	0.968	0.038
ENSG00000007944	MYLIP	myosin regulatory light chain interacting protein [Source:HGNC Symbol;Acc:21155]	0.473	0.494	0.767	0.192833
ENSG00000007952	NOX1	NADPH oxidase 1 [Source:HGNC Symbol;Acc:7889]	0.399	0.512833	-0.366	0.530167
ENSG00000007968	E2F2	E2F transcription factor 2 [Source:HGNC Symbol;Acc:3114]	-0.529	0.421	-0.766	0.186833
ENSG00000008018	PSMB1	proteasome (prosome, macropain) subunit, beta type, 1 [Source:HGNC Symbol;Acc:9537]	-0.686	0.288167	-0.865	0.1155
ENSG00000008056	SYN1	synapsin I [Source:HGNC Symbol;Acc:11494]	-0.755	0.225833	-0.866	0.113333
ENSG00000008083	JARID2	jumonji, AT rich interactive domain 2 [Source:HGNC Symbol;Acc:6196]	-0.834	0.132833	-0.643	0.301333
ENSG00000008086	CDKL5	cyclin-dependent kinase-like 5 [Source:HGNC Symbol;Acc:11411]	-0.304	0.632167	-0.865	0.117833
ENSG00000008128	CDK11A	cyclin-dependent kinase 11A [Source:HGNC Symbol;Acc:1730]	-0.549	0.391667	-0.812	0.154833
ENSG00000008130	NADK	NAD kinase [Source:HGNC Symbol;Acc:29831]	0.453	0.516833	-0.605	0.3515
ENSG00000008226	DLEC1	deleted in lung and esophageal cancer 1 [Source:HGNC Symbol;Acc:2899]	-0.062	0.738833	0.693	0.258667
ENSG00000008256	CYTH3	cytohesin 3 [Source:HGNC Symbol;Acc:9504]	-0.228	0.762	0.826	0.145833
ENSG00000008282	SYPL1	synaptophysin-like 1 [Source:HGNC Symbol;Acc:11507]	0.512	0.443667	0.682	0.267667
ENSG00000008283	CYB561	cytochrome b-561 [Source:HGNC Symbol;Acc:2571]	-0.442	0.503667	0.852	0.107333
ENSG00000008294	SPAG9	sperm associated antigen 9 [Source:HGNC Symbol;Acc:14524]	-0.371	0.517833	-0.378	0.569333
ENSG00000008300	CELSR3	cadherin, EGF LAG seven-pass G-type receptor 3 (flamingo homolog, Drosophila) [Source:HGNC Symbol;Acc:3230]	0.506	0.4465	0.305	0.666667
ENSG00000008311	AASS	aminoadipate-semialdehyde synthase [Source:HGNC Symbol;Acc:17366]	-0.494	0.411167	-0.64	0.302167
ENSG00000008323	PLEKHG6	pleckstrin homology domain containing, family G (with RhoGef domain) member 6 [Source:HGNC Symbol;Acc:25562]	-0.811	0.167667	-0.442	0.512167
ENSG00000008324	SS18L2	synovial sarcoma translocation gene on chromosome 18-like 2 [Source:HGNC Symbol;Acc:15593]	-0.658	0.3045	-0.081	0.801
ENSG00000008382	MPND	MPN domain containing [Source:HGNC Symbol;Acc:25934]	0.187	0.6175	-0.531	0.423333
ENSG00000008394	MGST1	microsomal glutathione S-transferase 1 [Source:HGNC Symbol;Acc:7061]	-0.7	0.256667	0.7	0.248667
ENSG00000008405	CRY1	cryptochrome 1 (photolyase-like) [Source:HGNC Symbol;Acc:2384]	-0.572	0.3795	-0.451	0.5245
ENSG00000008441	NFIX	nuclear factor I/X (CCAAT-binding transcription factor) [Source:HGNC Symbol;Acc:7788]	0.194	0.664833	0.001	0.9225
ENSG00000008513	ST3GAL1	ST3 beta-galactoside alpha-2,3-sialyltransferase 1 [Source:HGNC Symbol;Acc:10862]	-0.513	0.460167	-0.911	0.076
ENSG00000008516	MMP25	matrix metallopeptidase 25 [Source:HGNC Symbol;Acc:14246]	-0.436	0.4985	-0.382	0.491
ENSG00000008517	IL32	interleukin 32 [Source:HGNC Symbol;Acc:16830]	-0.529	0.4335	0.23	0.774
ENSG00000008710	PKD1	polycystic kidney disease 1 (autosomal dominant) [Source:HGNC Symbol;Acc:9008]	-0.176	0.637167	-0.21	0.786667
ENSG00000008735	MAPK8IP2	mitogen-activated protein kinase 8 interacting protein 2 [Source:HGNC Symbol;Acc:6883]	0.75	0.207	0.916	0.0695
ENSG00000008838	MED24	mediator complex subunit 24 [Source:HGNC Symbol;Acc:22963]	-0.497	0.451333	-0.87	0.113833
ENSG00000008853	RHOBTB2	Rho-related BTB domain containing 2 [Source:HGNC Symbol;Acc:18756]	0.225	0.783667	-0.108	0.856333
ENSG00000008869	HEATR5B	HEAT repeat containing 5B [Source:HGNC Symbol;Acc:29273]	0.453	0.5275	-0.535	0.423667
ENSG00000008952	SEC62	SEC62 homolog (S. cerevisiae) [Source:HGNC Symbol;Acc:11846]	0.658	0.282333	0.986	0.026
ENSG00000008988	RPS20	ribosomal protein S20 [Source:HGNC Symbol;Acc:10405]	-0.638	0.315333	-0.9	0.0881667
ENSG00000009307	CSDE1	cold shock domain containing E1, RNA-binding [Source:HGNC Symbol;Acc:29905]	0.374	0.605833	0.882	0.100667
ENSG00000009335	UBE3C	ubiquitin protein ligase E3C [Source:HGNC Symbol;Acc:16803]	-0.133	0.786	-0.87	0.109333
ENSG00000009413	REV3L	REV3-like, polymerase (DNA directed), zeta, catalytic subunit [Source:HGNC Symbol;Acc:9968]	0.53	0.441	0.201	0.747167
ENSG00000009724	MASP2	mannan-binding lectin serine peptidase 2 [Source:HGNC Symbol;Acc:6902]	-0.054	0.733833	-0.557	0.393167
ENSG00000009765	IYD	iodotyrosine deiodinase [Source:HGNC Symbol;Acc:21071]	-0.386	0.532	-0.098	0.492333
ENSG00000009780	FAM76A	family with sequence similarity 76, member A [Source:HGNC Symbol;Acc:28530]	0.521	0.4235	0.618	0.322167
ENSG00000009790	TRAF3IP3	TRAF3 interacting protein 3 [Source:HGNC Symbol;Acc:30766]	-0.442	0.529167	-0.024	0.703833
ENSG00000009830	POMT2	protein-O-mannosyltransferase 2 [Source:HGNC Symbol;Acc:19743]	0.567	0.381167	-0.196	0.813
ENSG00000009844	VTA1	Vps20-associated 1 homolog (S. cerevisiae) [Source:HGNC Symbol;Acc:20954]	-0.401	0.555167	-0.689	0.264
ENSG00000009950	MLXIPL	MLX interacting protein-like [Source:HGNC Symbol;Acc:12744]	0.257	0.508833	0.657	0.270833
ENSG00000009954	BAZ1B	bromodomain adjacent to zinc finger domain, 1B [Source:HGNC Symbol;Acc:961]	0.142	0.662667	-0.501	0.4505
ENSG00000010017	RANBP9	RAN binding protein 9 [Source:HGNC Symbol;Acc:13727]	-0.864	0.106	0.739	0.211167
ENSG00000010030	ETV7	ets variant 7 [Source:HGNC Symbol;Acc:18160]	0.594	0.3385	0.729	0.2195
ENSG00000010072	SPRTN	SprT-like N-terminal domain [Source:HGNC Symbol;Acc:25356]	0.414	0.549833	0.12	0.65
ENSG00000010165	METTL13	methyltransferase like 13 [Source:HGNC Symbol;Acc:24248]	-0.51	0.454	-0.428	0.526333
ENSG00000010219	DYRK4	dual-specificity tyrosine-(Y)-phosphorylation regulated kinase 4 [Source:HGNC Symbol;Acc:3095]	-0.22	0.771667	-0.828	0.1425
ENSG00000010244	ZNF207	zinc finger protein 207 [Source:HGNC Symbol;Acc:12998]	-0.6	0.351167	-0.912	0.0765
ENSG00000010256	UQCRC1	ubiquinol-cytochrome c reductase core protein I [Source:HGNC Symbol;Acc:12585]	-0.667	0.294333	-0.88	0.103333
ENSG00000010270	STARD3NL	STARD3 N-terminal like [Source:HGNC Symbol;Acc:19169]	-0.749	0.219667	0.213	0.7795
ENSG00000010278	CD9	CD9 molecule [Source:HGNC Symbol;Acc:1709]	0.345	0.645333	-0.854	0.106333
ENSG00000010292	NCAPD2	non-SMC condensin I complex, subunit D2 [Source:HGNC Symbol;Acc:24305]	-0.506	0.444	-0.698	0.254
ENSG00000010295	IFFO1	intermediate filament family orphan 1 [Source:HGNC Symbol;Acc:24970]	0.591	0.3605	0.985	0.0266667
ENSG00000010310	GIPR	gastric inhibitory polypeptide receptor [Source:HGNC Symbol;Acc:4271]	-0.146	0.639167	-0.413	0.559
ENSG00000010318	PHF7	PHD finger protein 7 [Source:HGNC Symbol;Acc:18458]	0.577	0.3665	0.932	0.0606667
ENSG00000010322	NISCH	nischarin [Source:HGNC Symbol;Acc:18006]	0.683	0.292333	0.607	0.335167
ENSG00000010361	FUZ	fuzzy homolog (Drosophila) [Source:HGNC Symbol;Acc:26219]	-0.639	0.3275	-0.41	0.557
ENSG00000010404	IDS	iduronate 2-sulfatase [Source:HGNC Symbol;Acc:5389]	0.602	0.371167	0.976	0.0326667
ENSG00000010438	PRSS3	protease, serine, 3 [Source:HGNC Symbol;Acc:9486]	-0.526	0.423	-0.549	0.395833
ENSG00000010539	ZNF200	zinc finger protein 200 [Source:HGNC Symbol;Acc:12993]	0.16	0.855167	-0.848	0.117333
ENSG00000010610	CD4	CD4 molecule [Source:HGNC Symbol;Acc:1678]	-0.315	0.555833	0.107	0.6195
ENSG00000010626	LRRC23	leucine rich repeat containing 23 [Source:HGNC Symbol;Acc:19138]	0.662	0.291	0.898	0.0866667
ENSG00000010704	HFE	hemochromatosis [Source:HGNC Symbol;Acc:4886]	-0.345	0.502167	0.316	0.666833
ENSG00000010803	SCMH1	sex comb on midleg homolog 1 (Drosophila) [Source:HGNC Symbol;Acc:19003]	-0.711	0.243833	-0.05	0.799167
ENSG00000010810	FYN	FYN oncogene related to SRC, FGR, YES [Source:HGNC Symbol;Acc:4037]	-0.703	0.241333	0.358	0.622
ENSG00000010818	HIVEP2	human immunodeficiency virus type I enhancer binding protein 2 [Source:HGNC Symbol;Acc:4921]	0.287	0.705	-0.308	0.638167
ENSG00000010932	FMO1	flavin containing monooxygenase 1 [Source:HGNC Symbol;Acc:3769]	-0.57	0.386833	0.691	0.260833
ENSG00000011007	TCEB3	transcription elongation factor B (SIII), polypeptide 3 (110kDa, elongin A) [Source:HGNC Symbol;Acc:11620]	0.085	0.8135	-0.668	0.270667
ENSG00000011009	LYPLA2	lysophospholipase II [Source:HGNC Symbol;Acc:6738]	0.352	0.586167	-0.887	0.0973333
ENSG00000011021	CLCN6	chloride channel, voltage-sensitive 6 [Source:HGNC Symbol;Acc:2024]	-0.554	0.419	0.184	0.6935
ENSG00000011028	MRC2	mannose receptor, C type 2 [Source:HGNC Symbol;Acc:16875]	0.672	0.279333	0.894	0.0908333
ENSG00000011052	NME2	NME/NM23 nucleoside diphosphate kinase 2 [Source:HGNC Symbol;Acc:7850]	-0.302	0.665167	-0.557	0.407667
ENSG00000011105	TSPAN9	tetraspanin 9 [Source:HGNC Symbol;Acc:21640]	-0.255	0.652167	1	0.0166667
ENSG00000011114	BTBD7	BTB (POZ) domain containing 7 [Source:HGNC Symbol;Acc:18269]	-0.458	0.494167	-0.896	0.0911667
ENSG00000011132	APBA3	amyloid beta (A4) precursor protein-binding, family A, member 3 [Source:HGNC Symbol;Acc:580]	-0.012	0.690667	-0.555	0.3955
ENSG00000011143	MKS1	Meckel syndrome, type 1 [Source:HGNC Symbol;Acc:7121]	-0.749	0.206833	-0.94	0.0566667
ENSG00000011198	ABHD5	abhydrolase domain containing 5 [Source:HGNC Symbol;Acc:21396]	-0.7	0.233333	-0.6	0.35
ENSG00000011201	KAL1	Kallmann syndrome 1 sequence [Source:HGNC Symbol;Acc:6211]	-0.607	0.352333	-0.476	0.492667
ENSG00000011243	AKAP8L	A kinase (PRKA) anchor protein 8-like [Source:HGNC Symbol;Acc:29857]	0.225	0.599667	-0.772	0.188
ENSG00000011258	MBTD1	mbt domain containing 1 [Source:HGNC Symbol;Acc:19866]	-0.262	0.662833	0.096	0.810667
ENSG00000011260	UTP18	UTP18 small subunit (SSU) processome component homolog (yeast) [Source:HGNC Symbol;Acc:24274]	-0.679	0.298333	-0.721	0.216
ENSG00000011275	RNF216	ring finger protein 216 [Source:HGNC Symbol;Acc:21698]	0.581	0.381167	-0.65	0.296333
ENSG00000011295	TTC19	tetratricopeptide repeat domain 19 [Source:HGNC Symbol;Acc:26006]	-0.038	0.725	0.136	0.89
ENSG00000011304	PTBP1	polypyrimidine tract binding protein 1 [Source:HGNC Symbol;Acc:9583]	-0.635	0.3075	-0.968	0.038
ENSG00000011332	DPF1	D4, zinc and double PHD fingers family 1 [Source:HGNC Symbol;Acc:20225]	-0.583	0.365167	-0.842	0.130167
ENSG00000011347	SYT7	synaptotagmin VII [Source:HGNC Symbol;Acc:11514]	-0.683	0.264	0.207	0.793333
ENSG00000011376	LARS2	leucyl-tRNA synthetase 2, mitochondrial [Source:HGNC Symbol;Acc:17095]	-0.721	0.235	-0.86	0.1165
ENSG00000011405	PIK3C2A	phosphatidylinositol-4-phosphate 3-kinase, catalytic subunit type 2 alpha [Source:HGNC Symbol;Acc:8971]	-0.009	0.710667	-0.516	0.433833
ENSG00000011422	PLAUR	plasminogen activator, urokinase receptor [Source:HGNC Symbol;Acc:9053]	-0.587	0.362333	-0.971	0.036
ENSG00000011426	ANLN	anillin, actin binding protein [Source:HGNC Symbol;Acc:14082]	-0.568	0.380167	-0.938	0.058
ENSG00000011451	WIZ	widely interspaced zinc finger motifs [Source:HGNC Symbol;Acc:30917]	0.455	0.477	-0.026	0.913
ENSG00000011454	RABGAP1	RAB GTPase activating protein 1 [Source:HGNC Symbol;Acc:17155]	-0.56	0.4005	0.467	0.495833
ENSG00000011465	DCN	decorin [Source:HGNC Symbol;Acc:2705]	-0.069	0.9655	0.964	0.0406667
ENSG00000011478	QPCTL	glutaminyl-peptide cyclotransferase-like [Source:HGNC Symbol;Acc:25952]	0.672	0.2765	0.175	0.825333
ENSG00000011485	PPP5C	protein phosphatase 5, catalytic subunit [Source:HGNC Symbol;Acc:9322]	-0.668	0.273833	-0.835	0.120167
ENSG00000011523	CEP68	centrosomal protein 68kDa [Source:HGNC Symbol;Acc:29076]	0.641	0.339167	0.576	0.378667
ENSG00000011566	MAP4K3	mitogen-activated protein kinase kinase kinase kinase 3 [Source:HGNC Symbol;Acc:6865]	-0.153	0.802667	0.812	0.161833
ENSG00000011638	TMEM159	transmembrane protein 159 [Source:HGNC Symbol;Acc:30136]	0.713	0.233167	0.632	0.307667
ENSG00000012048	BRCA1	breast cancer 1, early onset [Source:HGNC Symbol;Acc:1100]	-0.5	0.45	-0.634	0.310333
ENSG00000012061	ERCC1	excision repair cross-complementing rodent repair deficiency, complementation group 1 (includes overlapping antisense sequence) [Source:HGNC Symbol;Acc:3433]	-0.589	0.354667	-0.861	0.116
ENSG00000012171	SEMA3B	sema domain, immunoglobulin domain (Ig), short basic domain, secreted, (semaphorin) 3B [Source:HGNC Symbol;Acc:10724]	-0.167	0.849833	0.928	0.0646667
ENSG00000012174	MBTPS2	membrane-bound transcription factor peptidase, site 2 [Source:HGNC Symbol;Acc:15455]	0.802	0.154333	0.522	0.446667
ENSG00000012211	PRICKLE3	prickle homolog 3 (Drosophila) [Source:HGNC Symbol;Acc:6645]	0.702	0.2565	0.224	0.553833
ENSG00000012232	EXTL3	exostoses (multiple)-like 3 [Source:HGNC Symbol;Acc:3518]	0.377	0.590333	0.909	0.0803333
ENSG00000012660	ELOVL5	ELOVL fatty acid elongase 5 [Source:HGNC Symbol;Acc:21308]	-0.156	0.875333	0.58	0.346667
ENSG00000012817	KDM5D	lysine (K)-specific demethylase 5D [Source:HGNC Symbol;Acc:11115]	-0.844	0.123833	0.336	0.647167
ENSG00000012822	CALCOCO1	calcium binding and coiled-coil domain 1 [Source:HGNC Symbol;Acc:29306]	0.413	0.566	0.363	0.578333
ENSG00000012963	UBR7	ubiquitin protein ligase E3 component n-recognin 7 (putative) [Source:HGNC Symbol;Acc:20344]	-0.127	0.826	-0.453	0.517167
ENSG00000012983	MAP4K5	mitogen-activated protein kinase kinase kinase kinase 5 [Source:HGNC Symbol;Acc:6867]	-0.632	0.329667	0.667	0.281667
ENSG00000013016	EHD3	EH-domain containing 3 [Source:HGNC Symbol;Acc:3244]	-0.944	0.054	-0.67	0.268333
ENSG00000013275	PSMC4	proteasome (prosome, macropain) 26S subunit, ATPase, 4 [Source:HGNC Symbol;Acc:9551]	-0.652	0.2935	-0.739	0.2055
ENSG00000013288	MAN2B2	mannosidase, alpha, class 2B, member 2 [Source:HGNC Symbol;Acc:29623]	0.777	0.2095	0.866	0.112333
ENSG00000013293	SLC7A14	solute carrier family 7 (orphan transporter), member 14 [Source:HGNC Symbol;Acc:29326]	-0.543	0.424833	0.603	0.340833
ENSG00000013297	CLDN11	claudin 11 [Source:HGNC Symbol;Acc:8514]	-1	0.0166667	-0.755	0.187333
ENSG00000013306	SLC25A39	solute carrier family 25, member 39 [Source:HGNC Symbol;Acc:24279]	0.442	0.533833	-0.936	0.0585
ENSG00000013364	MVP	major vault protein [Source:HGNC Symbol;Acc:7531]	0.093	0.9535	-0.919	0.0686667
ENSG00000013374	NUB1	negative regulator of ubiquitin-like proteins 1 [Source:HGNC Symbol;Acc:17623]	0.691	0.259333	0.533	0.4355
ENSG00000013375	PGM3	phosphoglucomutase 3 [Source:HGNC Symbol;Acc:8907]	-0.577	0.399	-0.891	0.0941667
ENSG00000013392	RWDD2A	RWD domain containing 2A [Source:HGNC Symbol;Acc:21385]	0.685	0.264167	0.848	0.128833
ENSG00000013441	CLK1	CDC-like kinase 1 [Source:HGNC Symbol;Acc:2068]	0.525	0.425	-0.152	0.792167
ENSG00000013503	POLR3B	polymerase (RNA) III (DNA directed) polypeptide B [Source:HGNC Symbol;Acc:30348]	-0.489	0.465167	-0.69	0.2625
ENSG00000013523	ANGEL1	angel homolog 1 (Drosophila) [Source:HGNC Symbol;Acc:19961]	0.474	0.492667	0.714	0.234833
ENSG00000013561	RNF14	ring finger protein 14 [Source:HGNC Symbol;Acc:10058]	0.737	0.215167	0.963	0.0413333
ENSG00000013563	DNASE1L1	deoxyribonuclease I-like 1 [Source:HGNC Symbol;Acc:2957]	0.819	0.150167	0.877	0.0998333
ENSG00000013573	DDX11	DEAD/H (Asp-Glu-Ala-Asp/His) box helicase 11 [Source:HGNC Symbol;Acc:2736]	-0.54	0.409833	-0.623	0.323167
ENSG00000013583	HEBP1	heme binding protein 1 [Source:HGNC Symbol;Acc:17176]	-0.252	0.714	0.862	0.116333
ENSG00000013588	GPRC5A	G protein-coupled receptor, family C, group 5, member A [Source:HGNC Symbol;Acc:9836]	-0.264	0.586333	-0.481	0.476833
ENSG00000013619	MAMLD1	mastermind-like domain containing 1 [Source:HGNC Symbol;Acc:2568]	-0.7	0.233333	-0.466	0.462167
ENSG00000013810	TACC3	transforming, acidic coiled-coil containing protein 3 [Source:HGNC Symbol;Acc:11524]	-0.574	0.375167	-0.962	0.042
ENSG00000014123	UFL1	UFM1-specific ligase 1 [Source:HGNC Symbol;Acc:23039]	-0.629	0.333167	-0.765	0.195
ENSG00000014138	POLA2	polymerase (DNA directed), alpha 2, accessory subunit [Source:HGNC Symbol;Acc:30073]	-0.589	0.358667	-0.459	0.506667
ENSG00000014164	ZC3H3	zinc finger CCCH-type containing 3 [Source:HGNC Symbol;Acc:28972]	-0.096	0.6215	-0.836	0.133333
ENSG00000014216	CAPN1	calpain 1, (mu/I) large subunit [Source:HGNC Symbol;Acc:1476]	-0.364	0.580167	-0.952	0.0486667
ENSG00000014257	ACPP	acid phosphatase, prostate [Source:HGNC Symbol;Acc:125]	-0.498	0.437333	-0.628	0.317333
ENSG00000014641	MDH1	malate dehydrogenase 1, NAD (soluble) [Source:HGNC Symbol;Acc:6970]	-0.044	0.707667	-0.407	0.544333
ENSG00000014824	SLC30A9	solute carrier family 30 (zinc transporter), member 9 [Source:HGNC Symbol;Acc:1329]	-0.004	0.544333	-0.685	0.267167
ENSG00000014914	MTMR11	myotubularin related protein 11 [Source:HGNC Symbol;Acc:24307]	0.197	0.811833	0.397	0.580167
ENSG00000014919	COX15	COX15 homolog, cytochrome c oxidase assembly protein (yeast) [Source:HGNC Symbol;Acc:2263]	-0.412	0.545833	-0.626	0.319667
ENSG00000015153	YAF2	YY1 associated factor 2 [Source:HGNC Symbol;Acc:17363]	0.108	0.794	0.788	0.179333
ENSG00000015171	ZMYND11	zinc finger, MYND-type containing 11 [Source:HGNC Symbol;Acc:16966]	0.287	0.573	0.873	0.108833
ENSG00000015285	WAS	Wiskott-Aldrich syndrome [Source:HGNC Symbol;Acc:12731]	0.229	0.612833	-0.525	0.404167
ENSG00000015475	BID	BH3 interacting domain death agonist [Source:HGNC Symbol;Acc:1050]	-0.388	0.585833	-0.684	0.263667
ENSG00000015479	MATR3	matrin 3 [Source:HGNC Symbol;Acc:6912]	-0.648	0.293167	-0.808	0.158833
ENSG00000015532	XYLT2	xylosyltransferase II [Source:HGNC Symbol;Acc:15517]	0.806	0.164833	-0.813	0.155667
ENSG00000015568	RGPD5	RANBP2-like and GRIP domain containing 5 [Source:HGNC Symbol;Acc:32418]	0.004	0.796167	0.73	0.2195
ENSG00000015676	NUDCD3	NudC domain containing 3 [Source:HGNC Symbol;Acc:22208]	0.143	0.863	-0.292	0.653167
ENSG00000016391	CHDH	choline dehydrogenase [Source:HGNC Symbol;Acc:24288]	-0.319	0.4955	0.843	0.129333
ENSG00000016864	GLT8D1	glycosyltransferase 8 domain containing 1 [Source:HGNC Symbol;Acc:24870]	-0.43	0.518667	0.931	0.0665
ENSG00000017260	ATP2C1	ATPase, Ca++ transporting, type 2C, member 1 [Source:HGNC Symbol;Acc:13211]	-0.18	0.571	-0.768	0.194
ENSG00000017373	SRCIN1	SRC kinase signaling inhibitor 1 [Source:HGNC Symbol;Acc:29506]	-0.244	0.65	0.119	0.9205
ENSG00000017427	IGF1	insulin-like growth factor 1 (somatomedin C) [Source:HGNC Symbol;Acc:5464]	0.663	0.299833	0.959	0.044
ENSG00000017483	SLC38A5	solute carrier family 38, member 5 [Source:HGNC Symbol;Acc:18070]	-0.759	0.207667	0.585	0.365
ENSG00000017621	MAGIX	MAGI family member, X-linked [Source:HGNC Symbol;Acc:30006]	-0.067	0.6545	0.798	0.173167
ENSG00000017797	RALBP1	ralA binding protein 1 [Source:HGNC Symbol;Acc:9841]	0.207	0.780333	-0.178	0.6455
ENSG00000018189	RUFY3	RUN and FYVE domain containing 3 [Source:HGNC Symbol;Acc:30285]	-0.847	0.124667	0.335	0.625
ENSG00000018280	SLC11A1	solute carrier family 11 (proton-coupled divalent metal ion transporters), member 1 [Source:HGNC Symbol;Acc:10907]	-0.002	0.710333	-0.065	0.5655
ENSG00000018408	WWTR1	WW domain containing transcription regulator 1 [Source:HGNC Symbol;Acc:24042]	0.141	0.849	-0.773	0.197167
ENSG00000018510	AGPS	alkylglycerone phosphate synthase [Source:HGNC Symbol;Acc:327]	0.424	0.553	-0.799	0.162167
ENSG00000018610	CXorf56	chromosome X open reading frame 56 [Source:HGNC Symbol;Acc:26239]	-0.328	0.631833	-0.41	0.567167
ENSG00000018625	ATP1A2	ATPase, Na+/K+ transporting, alpha 2 polypeptide [Source:HGNC Symbol;Acc:800]	-0.7	0.233333	0.965	0.04
ENSG00000018699	TTC27	tetratricopeptide repeat domain 27 [Source:HGNC Symbol;Acc:25986]	-0.672	0.266	-0.975	0.0333333
ENSG00000018869	ZNF582	zinc finger protein 582 [Source:HGNC Symbol;Acc:26421]	0.584	0.385667	0.862	0.118167
ENSG00000019144	PHLDB1	pleckstrin homology-like domain, family B, member 1 [Source:HGNC Symbol;Acc:23697]	0.523	0.416333	-0.901	0.0881667
ENSG00000019485	PRDM11	PR domain containing 11 [Source:HGNC Symbol;Acc:13996]	0.211	0.555333	-0.569	0.388667
ENSG00000019549	SNAI2	snail homolog 2 (Drosophila) [Source:HGNC Symbol;Acc:11094]	-0.628	0.301333	-0.753	0.191333
ENSG00000019582	CD74	CD74 molecule, major histocompatibility complex, class II invariant chain [Source:HGNC Symbol;Acc:1697]	-0.879	0.1025	-0.245	0.638
ENSG00000019991	HGF	hepatocyte growth factor (hepapoietin A; scatter factor) [Source:HGNC Symbol;Acc:4893]	-0.24	0.766667	-0.614	0.328167
ENSG00000019995	ZRANB1	zinc finger, RAN-binding domain containing 1 [Source:HGNC Symbol;Acc:18224]	-0.366	0.573333	0.878	0.0998333
ENSG00000020129	NCDN	neurochondrin [Source:HGNC Symbol;Acc:17597]	0.547	0.400833	-0.718	0.233167
ENSG00000020181	GPR124	G protein-coupled receptor 124 [Source:HGNC Symbol;Acc:17849]	-0.659	0.289	0.617	0.330167
ENSG00000020256	ZFP64	zinc finger protein 64 homolog (mouse) [Source:HGNC Symbol;Acc:15940]	-0.77	0.202333	-0.937	0.0586667
ENSG00000020426	MNAT1	menage a trois homolog 1, cyclin H assembly factor (Xenopus laevis) [Source:HGNC Symbol;Acc:7181]	-0.529	0.444	-0.419	0.558667
ENSG00000020577	SAMD4A	sterile alpha motif domain containing 4A [Source:HGNC Symbol;Acc:23023]	0.302	0.697167	0.1	0.95
ENSG00000020922	MRE11A	MRE11 meiotic recombination 11 homolog A (S. cerevisiae) [Source:HGNC Symbol;Acc:7230]	-0.337	0.646667	-0.689	0.258
ENSG00000021300	PLEKHB1	pleckstrin homology domain containing, family B (evectins) member 1 [Source:HGNC Symbol;Acc:19079]	-0.779	0.1895	0.226	0.769167
ENSG00000021355	SERPINB1	serpin peptidase inhibitor, clade B (ovalbumin), member 1 [Source:HGNC Symbol;Acc:3311]	-0.24	0.754333	0.191	0.6705
ENSG00000021461	CYP3A43	cytochrome P450, family 3, subfamily A, polypeptide 43 [Source:HGNC Symbol;Acc:17450]	0.098	0.796667	0.204	0.466
ENSG00000021574	SPAST	spastin [Source:HGNC Symbol;Acc:11233]	0.09	0.787	0.892	0.089
ENSG00000021645	NRXN3	neurexin 3 [Source:HGNC Symbol;Acc:8010]	-0.208	0.817	0.853	0.126167
ENSG00000021762	OSBPL5	oxysterol binding protein-like 5 [Source:HGNC Symbol;Acc:16392]	0.079	0.728833	-0.88	0.103333
ENSG00000021776	AQR	aquarius homolog (mouse) [Source:HGNC Symbol;Acc:29513]	-0.723	0.232167	-0.261	0.717667
ENSG00000021826	CPS1	carbamoyl-phosphate synthase 1, mitochondrial [Source:HGNC Symbol;Acc:2323]	-0.616	0.344833	-0.855	0.121333
ENSG00000022267	FHL1	four and a half LIM domains 1 [Source:HGNC Symbol;Acc:3702]	0.619	0.327833	-0.57	0.38
ENSG00000022277	C20orf43	chromosome 20 open reading frame 43 [Source:HGNC Symbol;Acc:15890]	-0.835	0.129333	-0.958	0.0446667
ENSG00000022567	SLC45A4	solute carrier family 45, member 4 [Source:HGNC Symbol;Acc:29196]	0.302	0.554333	-0.2	0.825
ENSG00000022840	RNF10	ring finger protein 10 [Source:HGNC Symbol;Acc:10055]	0.552	0.420667	-0.325	0.636667
ENSG00000022976	ZNF839	zinc finger protein 839 [Source:HGNC Symbol;Acc:20345]	0.451	0.444333	-0.706	0.2515
ENSG00000023041	ZDHHC6	zinc finger, DHHC-type containing 6 [Source:HGNC Symbol;Acc:19160]	-0.77	0.1935	-0.837	0.141167
ENSG00000023171	GRAMD1B	GRAM domain containing 1B [Source:HGNC Symbol;Acc:29214]	0.026	0.93	-0.63	0.315
ENSG00000023191	RNH1	ribonuclease/angiogenin inhibitor 1 [Source:HGNC Symbol;Acc:10074]	-0.263	0.464	-0.374	0.603333
ENSG00000023228	NDUFS1	NADH dehydrogenase (ubiquinone) Fe-S protein 1, 75kDa (NADH-coenzyme Q reductase) [Source:HGNC Symbol;Acc:7707]	-0.192	0.660167	-0.804	0.168667
ENSG00000023287	RB1CC1	RB1-inducible coiled-coil 1 [Source:HGNC Symbol;Acc:15574]	0.388	0.589833	0.857	0.125
ENSG00000023318	ERP44	endoplasmic reticulum protein 44 [Source:HGNC Symbol;Acc:18311]	-0.259	0.644	0.736	0.224333
ENSG00000023330	ALAS1	aminolevulinate, delta-, synthase 1 [Source:HGNC Symbol;Acc:396]	0.734	0.204833	-0.113	0.755
ENSG00000023445	BIRC3	baculoviral IAP repeat containing 3 [Source:HGNC Symbol;Acc:591]	-0.17	0.808333	0.662	0.277667
ENSG00000023516	AKAP11	A kinase (PRKA) anchor protein 11 [Source:HGNC Symbol;Acc:369]	0.465	0.5065	-0.6	0.35
ENSG00000023572	GLRX2	glutaredoxin 2 [Source:HGNC Symbol;Acc:16065]	-0.348	0.5815	-0.768	0.196167
ENSG00000023608	SNAPC1	small nuclear RNA activating complex, polypeptide 1, 43kDa [Source:HGNC Symbol;Acc:11134]	-0.051	0.6515	-0.393	0.565667
ENSG00000023697	DERA	deoxyribose-phosphate aldolase (putative) [Source:HGNC Symbol;Acc:24269]	-0.804	0.159333	-0.462	0.5
ENSG00000023734	STRAP	serine/threonine kinase receptor associated protein [Source:HGNC Symbol;Acc:30796]	-0.64	0.339833	-0.498	0.477333
ENSG00000023839	ABCC2	ATP-binding cassette, sub-family C (CFTR/MRP), member 2 [Source:HGNC Symbol;Acc:53]	-0.175	0.575833	-0.138	0.6405
ENSG00000023892	DEF6	differentially expressed in FDCP 6 homolog (mouse) [Source:HGNC Symbol;Acc:2760]	-0.859	0.1165	-0.826	0.147167
ENSG00000023902	PLEKHO1	pleckstrin homology domain containing, family O member 1 [Source:HGNC Symbol;Acc:24310]	-0.748	0.224667	-0.836	0.131333
ENSG00000023909	GCLM	glutamate-cysteine ligase, modifier subunit [Source:HGNC Symbol;Acc:4312]	-0.22	0.792667	0.978	0.0313333
ENSG00000024048	UBR2	ubiquitin protein ligase E3 component n-recognin 2 [Source:HGNC Symbol;Acc:21289]	0.229	0.764333	-0.758	0.192833
ENSG00000024422	EHD2	EH-domain containing 2 [Source:HGNC Symbol;Acc:3243]	0.357	0.574667	-0.136	0.902
ENSG00000024526	DEPDC1	DEP domain containing 1 [Source:HGNC Symbol;Acc:22949]	-0.567	0.383	-0.955	0.0466667
ENSG00000024862	CCDC28A	coiled-coil domain containing 28A [Source:HGNC Symbol;Acc:21098]	0.314	0.662667	-0.259	0.518167
ENSG00000025156	HSF2	heat shock transcription factor 2 [Source:HGNC Symbol;Acc:5225]	-0.929	0.0625	-0.27	0.707667
ENSG00000025293	PHF20	PHD finger protein 20 [Source:HGNC Symbol;Acc:16098]	-0.073	0.747667	-0.753	0.19
ENSG00000025423	HSD17B6	hydroxysteroid (17-beta) dehydrogenase 6 homolog (mouse) [Source:HGNC Symbol;Acc:23316]	0.897	0.0911667	0.419	0.557667
ENSG00000025434	NR1H3	nuclear receptor subfamily 1, group H, member 3 [Source:HGNC Symbol;Acc:7966]	-0.6	0.341667	-0.95	0.0493333
ENSG00000025708	TYMP	thymidine phosphorylase [Source:HGNC Symbol;Acc:3148]	-0.729	0.226167	-0.532	0.41
ENSG00000025770	NCAPH2	non-SMC condensin II complex, subunit H2 [Source:HGNC Symbol;Acc:25071]	-0.636	0.3065	-0.967	0.0386667
ENSG00000025772	TOMM34	translocase of outer mitochondrial membrane 34 [Source:HGNC Symbol;Acc:15746]	0.333	0.628333	-0.989	0.024
ENSG00000025796	SEC63	SEC63 homolog (S. cerevisiae) [Source:HGNC Symbol;Acc:21082]	0.42	0.545	0.823	0.130833
ENSG00000025800	KPNA6	karyopherin alpha 6 (importin alpha 7) [Source:HGNC Symbol;Acc:6399]	0.213	0.7495	0.215	0.791667
ENSG00000026025	VIM	vimentin [Source:HGNC Symbol;Acc:12692]	-0.547	0.425	-0.752	0.203
ENSG00000026036	RTEL1-TNFRSF6B	RTEL1-TNFRSF6B readthrough (non-protein coding) [Source:HGNC Symbol;Acc:44095]	0.207	0.701833	-0.839	0.130833
ENSG00000026103	FAS	Fas (TNF receptor superfamily, member 6) [Source:HGNC Symbol;Acc:11920]	0.7	0.240833	-0.516	0.435333
ENSG00000026297	RNASET2	ribonuclease T2 [Source:HGNC Symbol;Acc:21686]	0.903	0.0766667	0.907	0.0838333
ENSG00000026508	CD44	CD44 molecule (Indian blood group) [Source:HGNC Symbol;Acc:1681]	0.941	0.0586667	-0.635	0.309167
ENSG00000026652	AGPAT4	1-acylglycerol-3-phosphate O-acyltransferase 4 (lysophosphatidic acid acyltransferase, delta) [Source:HGNC Symbol;Acc:20885]	-0.712	0.2615	0.282	0.698
ENSG00000026950	BTN3A1	butyrophilin, subfamily 3, member A1 [Source:HGNC Symbol;Acc:1138]	-0.432	0.561833	-0.513	0.443667
ENSG00000027001	MIPEP	mitochondrial intermediate peptidase [Source:HGNC Symbol;Acc:7104]	-0.378	0.598333	-0.641	0.3005
ENSG00000027075	PRKCH	protein kinase C, eta [Source:HGNC Symbol;Acc:9403]	0.115	0.749833	0.773	0.183333
ENSG00000027697	IFNGR1	interferon gamma receptor 1 [Source:HGNC Symbol;Acc:5439]	0.6	0.35	0.544	0.409833
ENSG00000027847	B4GALT7	xylosylprotein beta 1,4-galactosyltransferase, polypeptide 7 [Source:HGNC Symbol;Acc:930]	0.257	0.487833	-0.756	0.191333
ENSG00000028116	VRK2	vaccinia related kinase 2 [Source:HGNC Symbol;Acc:12719]	0.407	0.535833	-0.768	0.195833
ENSG00000028137	TNFRSF1B	tumor necrosis factor receptor superfamily, member 1B [Source:HGNC Symbol;Acc:11917]	-0.942	0.0545	-1	0.0166667
ENSG00000028203	VEZT	vezatin, adherens junctions transmembrane protein [Source:HGNC Symbol;Acc:18258]	-0.618	0.3285	-0.346	0.5845
ENSG00000028277	POU2F2	POU class 2 homeobox 2 [Source:HGNC Symbol;Acc:9213]	0.339	0.618333	-0.528	0.422
ENSG00000028310	BRD9	bromodomain containing 9 [Source:HGNC Symbol;Acc:25818]	-0.679	0.266333	-0.964	0.0406667
ENSG00000028528	SNX1	sorting nexin 1 [Source:HGNC Symbol;Acc:11172]	0.203	0.804167	-0.344	0.567
ENSG00000028839	TBPL1	TBP-like 1 [Source:HGNC Symbol;Acc:11589]	-0.446	0.5125	-0.522	0.403833
ENSG00000029153	ARNTL2	aryl hydrocarbon receptor nuclear translocator-like 2 [Source:HGNC Symbol;Acc:18984]	0.361	0.581667	-0.867	0.111667
ENSG00000029363	BCLAF1	BCL2-associated transcription factor 1 [Source:HGNC Symbol;Acc:16863]	-0.847	0.119833	-0.801	0.163333
ENSG00000029364	SLC39A9	solute carrier family 39 (zinc transporter), member 9 [Source:HGNC Symbol;Acc:20182]	0.624	0.351	0.81	0.155167
ENSG00000029534	ANK1	ankyrin 1, erythrocytic [Source:HGNC Symbol;Acc:492]	0.62	0.357	0.2	0.783333
ENSG00000029639	TFB1M	transcription factor B1, mitochondrial [Source:HGNC Symbol;Acc:17037]	0.662	0.293	-0.698	0.258167
ENSG00000029725	RABEP1	rabaptin, RAB GTPase binding effector protein 1 [Source:HGNC Symbol;Acc:17677]	0.393	0.583167	0.217	0.790833
ENSG00000029993	HMGB3	high mobility group box 3 [Source:HGNC Symbol;Acc:5004]	-0.582	0.365833	-0.595	0.348333
ENSG00000030066	NUP160	nucleoporin 160kDa [Source:HGNC Symbol;Acc:18017]	-0.501	0.465	-0.892	0.0946667
ENSG00000030110	BAK1	BCL2-antagonist/killer 1 [Source:HGNC Symbol;Acc:949]	0.33	0.6075	-0.969	0.0373333
ENSG00000030304	MUSK	muscle, skeletal, receptor tyrosine kinase [Source:HGNC Symbol;Acc:7525]	-0.679	0.288167	-0.741	0.2145
ENSG00000030419	IKZF2	IKAROS family zinc finger 2 (Helios) [Source:HGNC Symbol;Acc:13177]	-0.103	0.728	-0.295	0.652667
ENSG00000030582	GRN	granulin [Source:HGNC Symbol;Acc:4601]	0.673	0.264833	0.951	0.0493333
ENSG00000031003	FAM13B	family with sequence similarity 13, member B [Source:HGNC Symbol;Acc:1335]	0.671	0.304167	0.546	0.409
ENSG00000031081	ARHGAP31	Rho GTPase activating protein 31 [Source:HGNC Symbol;Acc:29216]	0.529	0.418167	-0.626	0.3135
ENSG00000031544	NR2E3	nuclear receptor subfamily 2, group E, member 3 [Source:HGNC Symbol;Acc:7974]	-0.819	0.147833	-0.573	0.380667
ENSG00000031691	CENPQ	centromere protein Q [Source:HGNC Symbol;Acc:21347]	-0.711	0.238	-0.562	0.391667
ENSG00000031698	SARS	seryl-tRNA synthetase [Source:HGNC Symbol;Acc:10537]	-0.158	0.872667	-0.1	0.95
ENSG00000031823	RANBP3	RAN binding protein 3 [Source:HGNC Symbol;Acc:9850]	-0.725	0.230833	-0.478	0.487
ENSG00000032219	ARID4A	AT rich interactive domain 4A (RBP1-like) [Source:HGNC Symbol;Acc:9885]	0.437	0.531333	0.818	0.152333
ENSG00000032389	TSSC1	tumor suppressing subtransferable candidate 1 [Source:HGNC Symbol;Acc:12383]	-0.623	0.3465	-0.821	0.137333
ENSG00000032444	PNPLA6	patatin-like phospholipase domain containing 6 [Source:HGNC Symbol;Acc:16268]	0.23	0.768	-0.607	0.321167
ENSG00000032742	IFT88	intraflagellar transport 88 homolog (Chlamydomonas) [Source:HGNC Symbol;Acc:20606]	0.025	0.760667	-0.321	0.656167
ENSG00000033011	ALG1	asparagine-linked glycosylation 1, beta-1,4-mannosyltransferase homolog (S. cerevisiae) [Source:HGNC Symbol;Acc:18294]	0.771	0.187833	-0.944	0.054
ENSG00000033030	ZCCHC8	zinc finger, CCHC domain containing 8 [Source:HGNC Symbol;Acc:25265]	-0.379	0.560333	-0.315	0.676833
ENSG00000033050	ABCF2	ATP-binding cassette, sub-family F (GCN20), member 2 [Source:HGNC Symbol;Acc:71]	-0.042	0.884	-0.892	0.0955
ENSG00000033100	CHPF2	chondroitin polymerizing factor 2 [Source:HGNC Symbol;Acc:29270]	0.541	0.415667	0.161	0.802
ENSG00000033170	FUT8	fucosyltransferase 8 (alpha (1,6) fucosyltransferase) [Source:HGNC Symbol;Acc:4019]	-0.552	0.395667	0.893	0.0913333
ENSG00000033178	UBA6	ubiquitin-like modifier activating enzyme 6 [Source:HGNC Symbol;Acc:25581]	-0.753	0.205833	-0.574	0.378333
ENSG00000033327	GAB2	GRB2-associated binding protein 2 [Source:HGNC Symbol;Acc:14458]	-0.026	0.741333	0.482	0.482333
ENSG00000033627	ATP6V0A1	ATPase, H+ transporting, lysosomal V0 subunit a1 [Source:HGNC Symbol;Acc:865]	0.31	0.678833	0.761	0.199167
ENSG00000033800	PIAS1	protein inhibitor of activated STAT, 1 [Source:HGNC Symbol;Acc:2752]	0.189	0.818167	0.066	0.6305
ENSG00000033867	SLC4A7	solute carrier family 4, sodium bicarbonate cotransporter, member 7 [Source:HGNC Symbol;Acc:11033]	-0.546	0.398	-0.623	0.323167
ENSG00000034053	APBA2	amyloid beta (A4) precursor protein-binding, family A, member 2 [Source:HGNC Symbol;Acc:579]	0.07	0.965	-0.654	0.287
ENSG00000034063	UHRF1	ubiquitin-like with PHD and ring finger domains 1 [Source:HGNC Symbol;Acc:12556]	-0.551	0.398167	-0.86	0.113333
ENSG00000034152	MAP2K3	mitogen-activated protein kinase kinase 3 [Source:HGNC Symbol;Acc:6843]	0.204	0.808	-0.901	0.079
ENSG00000034239	EFCAB1	EF-hand calcium binding domain 1 [Source:HGNC Symbol;Acc:25678]	-0.082	0.8165	0.091	0.7415
ENSG00000034510	TMSB10	thymosin beta 10 [Source:HGNC Symbol;Acc:11879]	-0.647	0.325	-0.91	0.0816667
ENSG00000034533	ASTE1	asteroid homolog 1 (Drosophila) [Source:HGNC Symbol;Acc:25021]	0.382	0.585667	0.358	0.625667
ENSG00000034677	RNF19A	ring finger protein 19A, E3 ubiquitin protein ligase [Source:HGNC Symbol;Acc:13432]	0.664	0.3055	0.516	0.4455
ENSG00000034693	PEX3	peroxisomal biogenesis factor 3 [Source:HGNC Symbol;Acc:8858]	-0.467	0.461333	0.082	0.857667
ENSG00000034713	GABARAPL2	GABA(A) receptor-associated protein-like 2 [Source:HGNC Symbol;Acc:13291]	0.724	0.2275	0.91	0.0816667
ENSG00000035115	SH3YL1	SH3 domain containing, Ysc84-like 1 (S. cerevisiae) [Source:HGNC Symbol;Acc:29546]	0.384	0.5745	0.842	0.1275
ENSG00000035141	FAM136A	family with sequence similarity 136, member A [Source:HGNC Symbol;Acc:25911]	-0.563	0.390167	-0.963	0.0413333
ENSG00000035403	VCL	vinculin [Source:HGNC Symbol;Acc:12665]	0.24	0.722	-0.877	0.1055
ENSG00000035499	DEPDC1B	DEP domain containing 1B [Source:HGNC Symbol;Acc:24902]	-0.594	0.352333	-0.961	0.0426667
ENSG00000035664	DAPK2	death-associated protein kinase 2 [Source:HGNC Symbol;Acc:2675]	0.151	0.866	-0.516	0.4155
ENSG00000035681	NSMAF	neutral sphingomyelinase (N-SMase) activation associated factor [Source:HGNC Symbol;Acc:8017]	-0.559	0.389667	0.231	0.673333
ENSG00000035687	ADSS	adenylosuccinate synthase [Source:HGNC Symbol;Acc:292]	0.695	0.250667	-0.281	0.704
ENSG00000035862	TIMP2	TIMP metallopeptidase inhibitor 2 [Source:HGNC Symbol;Acc:11821]	0.147	0.851333	0.754	0.192833
ENSG00000035928	RFC1	replication factor C (activator 1) 1, 145kDa [Source:HGNC Symbol;Acc:9969]	-0.538	0.415	-0.758	0.198667
ENSG00000036054	TBC1D23	TBC1 domain family, member 23 [Source:HGNC Symbol;Acc:25622]	0.036	0.9785	-0.852	0.131167
ENSG00000036257	CUL3	cullin 3 [Source:HGNC Symbol;Acc:2553]	0.026	0.822333	0.175	0.641833
ENSG00000036448	MYOM2	myomesin (M-protein) 2, 165kDa [Source:HGNC Symbol;Acc:7614]	0.137	0.748	0.783	0.180333
ENSG00000036530	CYP46A1	cytochrome P450, family 46, subfamily A, polypeptide 1 [Source:HGNC Symbol;Acc:2641]	0.598	0.387333	0.674	0.288167
ENSG00000036549	ZZZ3	zinc finger, ZZ-type containing 3 [Source:HGNC Symbol;Acc:24523]	-0.528	0.441333	-0.452	0.505
ENSG00000036672	USP2	ubiquitin specific peptidase 2 [Source:HGNC Symbol;Acc:12618]	-0.116	0.802667	0.1	0.7235
ENSG00000037042	TUBG2	tubulin, gamma 2 [Source:HGNC Symbol;Acc:12419]	0.083	0.858833	0.094	0.953
ENSG00000037241	RPL26L1	ribosomal protein L26-like 1 [Source:HGNC Symbol;Acc:17050]	-0.464	0.512833	-0.867	0.110667
ENSG00000037280	FLT4	fms-related tyrosine kinase 4 [Source:HGNC Symbol;Acc:3767]	-0.497	0.4655	0.186	0.533333
ENSG00000037474	NSUN2	NOP2/Sun RNA methyltransferase family, member 2 [Source:HGNC Symbol;Acc:25994]	-0.33	0.645333	-0.871	0.109833
ENSG00000037637	FBXO42	F-box protein 42 [Source:HGNC Symbol;Acc:29249]	0.072	0.745167	-0.785	0.175333
ENSG00000037749	MFAP3	microfibrillar-associated protein 3 [Source:HGNC Symbol;Acc:7034]	-0.215	0.793333	0.551	0.407333
ENSG00000037757	MRI1	methylthioribose-1-phosphate isomerase homolog (S. cerevisiae) [Source:HGNC Symbol;Acc:28469]	0.339	0.4305	-0.79	0.165833
ENSG00000037897	METTL1	methyltransferase like 1 [Source:HGNC Symbol;Acc:7030]	-0.719	0.256	-0.864	0.100167
ENSG00000038002	AGA	aspartylglucosaminidase [Source:HGNC Symbol;Acc:318]	-0.079	0.937	-0.742	0.196167
ENSG00000038210	PI4K2B	phosphatidylinositol 4-kinase type 2 beta [Source:HGNC Symbol;Acc:18215]	-0.829	0.1385	-0.866	0.111
ENSG00000038219	BOD1L1	biorientation of chromosomes in cell division 1-like 1 [Source:HGNC Symbol;Acc:31792]	0.323	0.565333	-0.796	0.170333
ENSG00000038274	MAT2B	methionine adenosyltransferase II, beta [Source:HGNC Symbol;Acc:6905]	-0.164	0.584	0.034	0.845
ENSG00000038358	EDC4	enhancer of mRNA decapping 4 [Source:HGNC Symbol;Acc:17157]	-0.268	0.696667	-0.88	0.103333
ENSG00000038382	TRIO	trio Rho guanine nucleotide exchange factor [Source:HGNC Symbol;Acc:12303]	-0.66	0.298833	-0.796	0.172
ENSG00000038427	VCAN	versican [Source:HGNC Symbol;Acc:2464]	-0.565	0.384333	0.617	0.3305
ENSG00000038532	CLEC16A	C-type lectin domain family 16, member A [Source:HGNC Symbol;Acc:29013]	-0.119	0.651	-0.618	0.3375
ENSG00000039068	CDH1	cadherin 1, type 1, E-cadherin (epithelial) [Source:HGNC Symbol;Acc:1748]	0.395	0.5555	0.861	0.112
ENSG00000039123	SKIV2L2	superkiller viralicidic activity 2-like 2 (S. cerevisiae) [Source:HGNC Symbol;Acc:18734]	-0.822	0.151	-0.621	0.3255
ENSG00000039139	DNAH5	dynein, axonemal, heavy chain 5 [Source:HGNC Symbol;Acc:2950]	-0.492	0.391333	0.164	0.790667
ENSG00000039319	ZFYVE16	zinc finger, FYVE domain containing 16 [Source:HGNC Symbol;Acc:20756]	-0.634	0.322	0.667	0.282833
ENSG00000039523	FAM65A	family with sequence similarity 65, member A [Source:HGNC Symbol;Acc:25836]	-0.086	0.608833	-0.799	0.1615
ENSG00000039560	RAI14	retinoic acid induced 14 [Source:HGNC Symbol;Acc:14873]	0.228	0.786333	-0.397	0.541833
ENSG00000039650	PNKP	polynucleotide kinase 3'-phosphatase [Source:HGNC Symbol;Acc:9154]	0.047	0.731	-0.531	0.402167
ENSG00000040199	PHLPP2	PH domain and leucine rich repeat protein phosphatase 2 [Source:HGNC Symbol;Acc:29149]	-0.353	0.631167	-0.564	0.380667
ENSG00000040275	CCDC99	coiled-coil domain containing 99 [Source:HGNC Symbol;Acc:26010]	-0.509	0.441	-0.913	0.0763333
ENSG00000040341	STAU2	staufen, RNA binding protein, homolog 2 (Drosophila) [Source:HGNC Symbol;Acc:11371]	0.139	0.879667	0.843	0.127167
ENSG00000040487	PQLC2	PQ loop repeat containing 2 [Source:HGNC Symbol;Acc:26001]	0.407	0.521333	-0.261	0.569167
ENSG00000040531	CTNS	cystinosin, lysosomal cystine transporter [Source:HGNC Symbol;Acc:2518]	0.064	0.93	0.213	0.793833
ENSG00000040608	RTN4R	reticulon 4 receptor [Source:HGNC Symbol;Acc:18601]	-0.154	0.659167	0.842	0.134167
ENSG00000040633	PHF23	PHD finger protein 23 [Source:HGNC Symbol;Acc:28428]	0.689	0.257667	0.084	0.942833
ENSG00000040933	INPP4A	inositol polyphosphate-4-phosphatase, type I, 107kDa [Source:HGNC Symbol;Acc:6074]	-0.45	0.457667	0.694	0.262667
ENSG00000041353	RAB27B	RAB27B, member RAS oncogene family [Source:HGNC Symbol;Acc:9767]	0.465	0.497	0.254	0.731167
ENSG00000041357	PSMA4	proteasome (prosome, macropain) subunit, alpha type, 4 [Source:HGNC Symbol;Acc:9533]	-0.448	0.528333	-0.901	0.0885
ENSG00000041802	LSG1	large subunit GTPase 1 homolog (S. cerevisiae) [Source:HGNC Symbol;Acc:25652]	-0.246	0.707667	-0.666	0.273
ENSG00000041880	PARP3	poly (ADP-ribose) polymerase family, member 3 [Source:HGNC Symbol;Acc:273]	0.722	0.223833	0.665	0.289
ENSG00000041982	TNC	tenascin C [Source:HGNC Symbol;Acc:5318]	-0.605	0.343833	-0.366	0.573333
ENSG00000041988	THAP3	THAP domain containing, apoptosis associated protein 3 [Source:HGNC Symbol;Acc:20855]	0.261	0.624333	-0.385	0.537833
ENSG00000042062	FAM65C	family with sequence similarity 65, member C [Source:HGNC Symbol;Acc:16168]	0.17	0.856667	-0.46	0.5
ENSG00000042088	TDP1	tyrosyl-DNA phosphodiesterase 1 [Source:HGNC Symbol;Acc:18884]	-0.553	0.397	-0.6	0.35
ENSG00000042286	AIFM2	apoptosis-inducing factor, mitochondrion-associated, 2 [Source:HGNC Symbol;Acc:21411]	-0.37	0.574667	0.733	0.231833
ENSG00000042304	C2orf83	chromosome 2 open reading frame 83 [Source:HGNC Symbol;Acc:25344]	-0.427	0.517667	-0.154	0.538
ENSG00000042317	SPATA7	spermatogenesis associated 7 [Source:HGNC Symbol;Acc:20423]	-0.308	0.666833	-0.095	0.841
ENSG00000042429	MED17	mediator complex subunit 17 [Source:HGNC Symbol;Acc:2375]	-0.548	0.402	-0.759	0.218
ENSG00000042445	RETSAT	retinol saturase (all-trans-retinol 13,14-reductase) [Source:HGNC Symbol;Acc:25991]	0.7	0.233333	0.822	0.143167
ENSG00000042493	CAPG	capping protein (actin filament), gelsolin-like [Source:HGNC Symbol;Acc:1474]	-0.892	0.0965	-0.895	0.0918333
ENSG00000042753	AP2S1	adaptor-related protein complex 2, sigma 1 subunit [Source:HGNC Symbol;Acc:565]	-0.061	0.734667	-0.907	0.0838333
ENSG00000042781	USH2A	Usher syndrome 2A (autosomal recessive, mild) [Source:HGNC Symbol;Acc:12601]	0.484	0.428667	1	0.0166667
ENSG00000042832	TG	thyroglobulin [Source:HGNC Symbol;Acc:11764]	0.783	0.193667	0.645	0.3115
ENSG00000042980	ADAM28	ADAM metallopeptidase domain 28 [Source:HGNC Symbol;Acc:206]	-0.088	0.8	0.398	0.577667
ENSG00000043093	DCUN1D1	DCN1, defective in cullin neddylation 1, domain containing 1 (S. cerevisiae) [Source:HGNC Symbol;Acc:18184]	0.312	0.615	0.838	0.135167
ENSG00000043143	PHF15	PHD finger protein 15 [Source:HGNC Symbol;Acc:22984]	0.096	0.931	-0.39	0.583333
ENSG00000043514	TRIT1	tRNA isopentenyltransferase 1 [Source:HGNC Symbol;Acc:20286]	-0.666	0.292167	-0.836	0.133667
ENSG00000044090	CUL7	cullin 7 [Source:HGNC Symbol;Acc:21024]	-0.776	0.197167	-0.913	0.0795
ENSG00000044115	CTNNA1	catenin (cadherin-associated protein), alpha 1, 102kDa [Source:HGNC Symbol;Acc:2509]	0.444	0.519	-0.614	0.333667
ENSG00000044446	PHKA2	phosphorylase kinase, alpha 2 (liver) [Source:HGNC Symbol;Acc:8926]	-0.71	0.239	-0.833	0.136333
ENSG00000044459	CNTLN	centlein, centrosomal protein [Source:HGNC Symbol;Acc:23432]	-0.823	0.141	-0.842	0.126833
ENSG00000044574	HSPA5	heat shock 70kDa protein 5 (glucose-regulated protein, 78kDa) [Source:HGNC Symbol;Acc:5238]	-0.3	0.683333	-0.7	0.233333
ENSG00000046604	DSG2	desmoglein 2 [Source:HGNC Symbol;Acc:3049]	0.434	0.532667	0.092	0.503333
ENSG00000046647	GEMIN8	gem (nuclear organelle) associated protein 8 [Source:HGNC Symbol;Acc:26044]	0.214	0.709667	0.196	0.595667
ENSG00000046651	OFD1	oral-facial-digital syndrome 1 [Source:HGNC Symbol;Acc:2567]	-0.435	0.523	0.89	0.09
ENSG00000046653	GPM6B	glycoprotein M6B [Source:HGNC Symbol;Acc:4461]	0.423	0.440667	0.96	0.0433333
ENSG00000047056	WDR37	WD repeat domain 37 [Source:HGNC Symbol;Acc:31406]	0.576	0.382333	0.272	0.685833
ENSG00000047188	YTHDC2	YTH domain containing 2 [Source:HGNC Symbol;Acc:24721]	0.115	0.749833	-0.294	0.644333
ENSG00000047230	CTPS2	CTP synthase 2 [Source:HGNC Symbol;Acc:2520]	0.219	0.754167	0.764	0.18
ENSG00000047249	ATP6V1H	ATPase, H+ transporting, lysosomal 50/57kDa, V1 subunit H [Source:HGNC Symbol;Acc:18303]	0.439	0.526	0.503	0.464333
ENSG00000047315	POLR2B	polymerase (RNA) II (DNA directed) polypeptide B, 140kDa [Source:HGNC Symbol;Acc:9188]	-0.649	0.296333	-0.848	0.129167
ENSG00000047346	FAM214A	family with sequence similarity 214, member A [Source:HGNC Symbol;Acc:25609]	0.521	0.450167	0.802	0.158833
ENSG00000047410	TPR	translocated promoter region, nuclear basket protein [Source:HGNC Symbol;Acc:12017]	-0.512	0.405333	-0.856	0.121667
ENSG00000047578	KIAA0556	KIAA0556 [Source:HGNC Symbol;Acc:29068]	0.375	0.606167	-0.874	0.109
ENSG00000047579	DTNBP1	dystrobrevin binding protein 1 [Source:HGNC Symbol;Acc:17328]	-0.39	0.5575	-0.458	0.433
ENSG00000047617	ANO2	anoctamin 2 [Source:HGNC Symbol;Acc:1183]	0.136	0.537833	0.506	0.474833
ENSG00000047621	C12orf4	chromosome 12 open reading frame 4 [Source:HGNC Symbol;Acc:1184]	-0.514	0.4545	-0.603	0.364167
ENSG00000047634	SCML1	sex comb on midleg-like 1 (Drosophila) [Source:HGNC Symbol;Acc:10580]	-0.517	0.415333	-0.025	0.9875
ENSG00000047644	WWC3	WWC family member 3 [Source:HGNC Symbol;Acc:29237]	-0.914	0.0715	-0.911	0.0731667
ENSG00000047648	ARHGAP6	Rho GTPase activating protein 6 [Source:HGNC Symbol;Acc:676]	0.705	0.2475	-0.345	0.63
ENSG00000047662	FAM184B	family with sequence similarity 184, member B [Source:HGNC Symbol;Acc:29235]	-0.154	0.6325	-0.368	0.615
ENSG00000047849	MAP4	microtubule-associated protein 4 [Source:HGNC Symbol;Acc:6862]	0.258	0.721333	-0.801	0.167333
ENSG00000047932	GOPC	golgi-associated PDZ and coiled-coil motif containing [Source:HGNC Symbol;Acc:17643]	0.409	0.551667	0	0.803667
ENSG00000048028	USP28	ubiquitin specific peptidase 28 [Source:HGNC Symbol;Acc:12625]	-0.833	0.130167	-0.628	0.324667
ENSG00000048052	HDAC9	histone deacetylase 9 [Source:HGNC Symbol;Acc:14065]	0.396	0.577333	0.883	0.0996667
ENSG00000048140	TSPAN17	tetraspanin 17 [Source:HGNC Symbol;Acc:13594]	0.602	0.3645	-0.834	0.138833
ENSG00000048162	NOP16	NOP16 nucleolar protein homolog (yeast) [Source:HGNC Symbol;Acc:26934]	-0.537	0.431	-0.801	0.1525
ENSG00000048342	CC2D2A	coiled-coil and C2 domain containing 2A [Source:HGNC Symbol;Acc:29253]	-0.542	0.398167	-0.844	0.134
ENSG00000048392	RRM2B	ribonucleotide reductase M2 B (TP53 inducible) [Source:HGNC Symbol;Acc:17296]	0.596	0.351833	0.838	0.129833
ENSG00000048405	ZNF800	zinc finger protein 800 [Source:HGNC Symbol;Acc:27267]	0.046	0.591	-0.637	0.324833
ENSG00000048471	SNX29	sorting nexin 29 [Source:HGNC Symbol;Acc:30542]	0.097	0.920833	-0.077	0.722333
ENSG00000048544	MRPS10	mitochondrial ribosomal protein S10 [Source:HGNC Symbol;Acc:14502]	-0.336	0.4595	-0.574	0.366833
ENSG00000048649	RSF1	remodeling and spacing factor 1 [Source:HGNC Symbol;Acc:18118]	0.402	0.572833	-0.851	0.124333
ENSG00000048707	VPS13D	vacuolar protein sorting 13 homolog D (S. cerevisiae) [Source:HGNC Symbol;Acc:23595]	0.636	0.331167	0.117	0.821167
ENSG00000048740	CELF2	CUGBP, Elav-like family member 2 [Source:HGNC Symbol;Acc:2550]	-0.806	0.153833	-0.1	0.95
ENSG00000048828	FAM120A	family with sequence similarity 120A [Source:HGNC Symbol;Acc:13247]	-0.248	0.512833	-0.992	0.022
ENSG00000048991	R3HDM1	R3H domain containing 1 [Source:HGNC Symbol;Acc:9757]	-0.679	0.272333	-0.88	0.103333
ENSG00000049089	COL9A2	collagen, type IX, alpha 2 [Source:HGNC Symbol;Acc:2218]	-0.066	0.731	0.935	0.0618333
ENSG00000049130	KITLG	KIT ligand [Source:HGNC Symbol;Acc:6343]	-0.212	0.791333	-0.6	0.35
ENSG00000049167	ERCC8	excision repair cross-complementing rodent repair deficiency, complementation group 8 [Source:HGNC Symbol;Acc:3439]	-0.559	0.408833	-0.655	0.301667
ENSG00000049192	ADAMTS6	ADAM metallopeptidase with thrombospondin type 1 motif, 6 [Source:HGNC Symbol;Acc:222]	-0.619	0.327833	-0.889	0.0968333
ENSG00000049239	H6PD	hexose-6-phosphate dehydrogenase (glucose 1-dehydrogenase) [Source:HGNC Symbol;Acc:4795]	0.585	0.379333	0.818	0.153
ENSG00000049245	VAMP3	vesicle-associated membrane protein 3 (cellubrevin) [Source:HGNC Symbol;Acc:12644]	0.564	0.39	0.89	0.0971667
ENSG00000049246	PER3	period homolog 3 (Drosophila) [Source:HGNC Symbol;Acc:8847]	-0.488	0.472667	0.878	0.106667
ENSG00000049283	EPN3	epsin 3 [Source:HGNC Symbol;Acc:18235]	0.032	0.630333	0.871	0.107833
ENSG00000049323	LTBP1	latent transforming growth factor beta binding protein 1 [Source:HGNC Symbol;Acc:6714]	0.369	0.610333	-0.553	0.397
ENSG00000049449	RCN1	reticulocalbin 1, EF-hand calcium binding domain [Source:HGNC Symbol;Acc:9934]	-0.196	0.822	-0.193	0.685667
ENSG00000049540	ELN	elastin [Source:HGNC Symbol;Acc:3327]	-0.618	0.329	0.818	0.124333
ENSG00000049541	RFC2	replication factor C (activator 1) 2, 40kDa [Source:HGNC Symbol;Acc:9970]	-0.584	0.363667	-0.837	0.128333
ENSG00000049618	ARID1B	AT rich interactive domain 1B (SWI1-like) [Source:HGNC Symbol;Acc:18040]	-0.51	0.377333	-0.746	0.211333
ENSG00000049656	CLPTM1L	CLPTM1-like [Source:HGNC Symbol;Acc:24308]	0.699	0.244	0.312	0.663333
ENSG00000049759	NEDD4L	neural precursor cell expressed, developmentally down-regulated 4-like, E3 ubiquitin protein ligase [Source:HGNC Symbol;Acc:7728]	0.012	0.994	-0.514	0.436
ENSG00000049768	FOXP3	forkhead box P3 [Source:HGNC Symbol;Acc:6106]	-0.082	0.590333	-0.532	0.421833
ENSG00000049769	PPP1R3F	protein phosphatase 1, regulatory subunit 3F [Source:HGNC Symbol;Acc:14944]	0.455	0.495833	0.802	0.171167
ENSG00000049860	HEXB	hexosaminidase B (beta polypeptide) [Source:HGNC Symbol;Acc:4879]	0.614	0.332333	0.266	0.698
ENSG00000049883	PTCD2	pentatricopeptide repeat domain 2 [Source:HGNC Symbol;Acc:25734]	-0.198	0.654333	-0.53	0.420667
ENSG00000050130	JKAMP	JNK1/MAPK8-associated membrane protein [Source:HGNC Symbol;Acc:20184]	0.675	0.2735	0.698	0.266333
ENSG00000050165	DKK3	dickkopf 3 homolog (Xenopus laevis) [Source:HGNC Symbol;Acc:2893]	0.953	0.048	0.949	0.0506667
ENSG00000050327	ARHGEF5	Rho guanine nucleotide exchange factor (GEF) 5 [Source:HGNC Symbol;Acc:13209]	-0.945	0.053	0.333	0.630333
ENSG00000050344	NFE2L3	nuclear factor (erythroid-derived 2)-like 3 [Source:HGNC Symbol;Acc:7783]	0.288	0.685167	0.15	0.883333
ENSG00000050393	CCDC90A	coiled-coil domain containing 90A [Source:HGNC Symbol;Acc:21097]	-0.149	0.860333	-0.224	0.785
ENSG00000050405	LIMA1	LIM domain and actin binding 1 [Source:HGNC Symbol;Acc:24636]	-0.677	0.260167	-0.9	0.0833333
ENSG00000050426	LETMD1	LETM1 domain containing 1 [Source:HGNC Symbol;Acc:24241]	0.184	0.845	0.183	0.781
ENSG00000050438	SLC4A8	solute carrier family 4, sodium bicarbonate cotransporter, member 8 [Source:HGNC Symbol;Acc:11034]	0.227	0.702833	-0.649	0.292833
ENSG00000050628	PTGER3	prostaglandin E receptor 3 (subtype EP3) [Source:HGNC Symbol;Acc:9595]	0.067	0.512	0.498	0.454167
ENSG00000050730	TNIP3	TNFAIP3 interacting protein 3 [Source:HGNC Symbol;Acc:19315]	-0.767	0.168167	-0.295	0.598167
ENSG00000050748	MAPK9	mitogen-activated protein kinase 9 [Source:HGNC Symbol;Acc:6886]	0.407	0.567	1	0.0166667
ENSG00000050820	BCAR1	breast cancer anti-estrogen resistance 1 [Source:HGNC Symbol;Acc:971]	-0.286	0.637667	-0.7	0.233333
ENSG00000051009	FAM160A2	family with sequence similarity 160, member A2 [Source:HGNC Symbol;Acc:25378]	0.066	0.904	-0.191	0.814167
ENSG00000051108	HERPUD1	homocysteine-inducible, endoplasmic reticulum stress-inducible, ubiquitin-like domain member 1 [Source:HGNC Symbol;Acc:13744]	-0.422	0.543833	-0.318	0.644333
ENSG00000051128	HOMER3	homer homolog 3 (Drosophila) [Source:HGNC Symbol;Acc:17514]	-0.067	0.667167	-0.876	0.109
ENSG00000051180	RAD51	RAD51 homolog (S. cerevisiae) [Source:HGNC Symbol;Acc:9817]	-0.561	0.387833	-0.746	0.198833
ENSG00000051341	POLQ	polymerase (DNA directed), theta [Source:HGNC Symbol;Acc:9186]	-0.583	0.364667	-0.809	0.161167
ENSG00000051382	PIK3CB	phosphatidylinositol-4,5-bisphosphate 3-kinase, catalytic subunit beta [Source:HGNC Symbol;Acc:8976]	-0.172	0.770667	-0.104	0.823167
ENSG00000051523	CYBA	cytochrome b-245, alpha polypeptide [Source:HGNC Symbol;Acc:2577]	-0.954	0.0466667	-0.663	0.2885
ENSG00000051596	THOC3	THO complex 3 [Source:HGNC Symbol;Acc:19072]	-0.611	0.337333	-0.73	0.203333
ENSG00000051620	HEBP2	heme binding protein 2 [Source:HGNC Symbol;Acc:15716]	-0.629	0.3375	0.545	0.4135
ENSG00000051825	MPHOSPH9	M-phase phosphoprotein 9 [Source:HGNC Symbol;Acc:7215]	-0.806	0.151833	-0.815	0.1535
ENSG00000052126	PLEKHA5	pleckstrin homology domain containing, family A member 5 [Source:HGNC Symbol;Acc:30036]	-0.48	0.488833	0.464	0.479333
ENSG00000052344	PRSS8	protease, serine, 8 [Source:HGNC Symbol;Acc:9491]	-0.262	0.556	0.224	0.689333
ENSG00000052723	SIKE1	suppressor of IKBKE 1 [Source:HGNC Symbol;Acc:26119]	-0.533	0.435833	-0.455	0.514167
ENSG00000052749	RRP12	ribosomal RNA processing 12 homolog (S. cerevisiae) [Source:HGNC Symbol;Acc:29100]	-0.324	0.589	-0.64	0.31
ENSG00000052795	FNIP2	folliculin interacting protein 2 [Source:HGNC Symbol;Acc:29280]	0.714	0.247	0.888	0.0935
ENSG00000052802	MSMO1	methylsterol monooxygenase 1 [Source:HGNC Symbol;Acc:10545]	-0.1	0.95	0.621	0.3255
ENSG00000052841	TTC17	tetratricopeptide repeat domain 17 [Source:HGNC Symbol;Acc:25596]	-0.278	0.671667	0.332	0.63
ENSG00000053254	FOXN3	forkhead box N3 [Source:HGNC Symbol;Acc:1928]	0.22	0.779833	0.66	0.284667
ENSG00000053371	AKR7A2	aldo-keto reductase family 7, member A2 (aflatoxin aldehyde reductase) [Source:HGNC Symbol;Acc:389]	0.279	0.6755	-0.832	0.138
ENSG00000053372	MRTO4	mRNA turnover 4 homolog (S. cerevisiae) [Source:HGNC Symbol;Acc:18477]	-0.715	0.243833	-0.933	0.059
ENSG00000053438	NNAT	neuronatin [Source:HGNC Symbol;Acc:7860]	-1	0.0166667	-0.709	0.2415
ENSG00000053501	USE1	unconventional SNARE in the ER 1 homolog (S. cerevisiae) [Source:HGNC Symbol;Acc:30882]	-0.376	0.575	-0.596	0.358167
ENSG00000053524	MCF2L2	MCF.2 cell line derived transforming sequence-like 2 [Source:HGNC Symbol;Acc:30319]	-0.232	0.637667	0.354	0.6165
ENSG00000053702	NRIP2	nuclear receptor interacting protein 2 [Source:HGNC Symbol;Acc:23078]	-0.525	0.439667	-0.633	0.3175
ENSG00000053747	LAMA3	laminin, alpha 3 [Source:HGNC Symbol;Acc:6483]	0.41	0.570167	0.592	0.349667
ENSG00000053770	AP5M1	adaptor-related protein complex 5, mu 1 subunit [Source:HGNC Symbol;Acc:20192]	-0.195	0.607833	0.952	0.0485
ENSG00000053900	ANAPC4	anaphase promoting complex subunit 4 [Source:HGNC Symbol;Acc:19990]	-0.731	0.231833	-0.8	0.16
ENSG00000054116	TRAPPC3	trafficking protein particle complex 3 [Source:HGNC Symbol;Acc:19942]	0.391	0.5835	-0.182	0.759167
ENSG00000054118	THRAP3	thyroid hormone receptor associated protein 3 [Source:HGNC Symbol;Acc:22964]	-0.523	0.407833	-0.841	0.129
ENSG00000054148	PHPT1	phosphohistidine phosphatase 1 [Source:HGNC Symbol;Acc:30033]	0.382	0.469333	0.384	0.601667
ENSG00000054267	ARID4B	AT rich interactive domain 4B (RBP1-like) [Source:HGNC Symbol;Acc:15550]	0.33	0.648667	-0.168	0.729167
ENSG00000054277	OPN3	opsin 3 [Source:HGNC Symbol;Acc:14007]	0.961	0.0425	0.937	0.061
ENSG00000054282	SDCCAG8	serologically defined colon cancer antigen 8 [Source:HGNC Symbol;Acc:10671]	0.038	0.981	-0.621	0.328167
ENSG00000054356	PTPRN	protein tyrosine phosphatase, receptor type, N [Source:HGNC Symbol;Acc:9676]	-0.6	0.35	-0.313	0.685333
ENSG00000054392	HHAT	hedgehog acyltransferase [Source:HGNC Symbol;Acc:18270]	0.933	0.0613333	0.862	0.102333
ENSG00000054523	KIF1B	kinesin family member 1B [Source:HGNC Symbol;Acc:16636]	0.353	0.5945	-0.901	0.0881667
ENSG00000054598	FOXC1	forkhead box C1 [Source:HGNC Symbol;Acc:3800]	0.387	0.534	-0.17	0.839833
ENSG00000054611	TBC1D22A	TBC1 domain family, member 22A [Source:HGNC Symbol;Acc:1309]	0.392	0.597167	-0.85	0.127167
ENSG00000054654	SYNE2	spectrin repeat containing, nuclear envelope 2 [Source:HGNC Symbol;Acc:17084]	-0.808	0.162167	-0.79	0.1675
ENSG00000054690	PLEKHH1	pleckstrin homology domain containing, family H (with MyTH4 domain) member 1 [Source:HGNC Symbol;Acc:17733]	-0.391	0.483667	-0.53	0.42
ENSG00000054793	ATP9A	ATPase, class II, type 9A [Source:HGNC Symbol;Acc:13540]	0.151	0.856833	0.135	0.793333
ENSG00000054938	CHRDL2	chordin-like 2 [Source:HGNC Symbol;Acc:24168]	-0.021	0.801167	-0.22	0.717833
ENSG00000054965	FAM168A	family with sequence similarity 168, member A [Source:HGNC Symbol;Acc:28999]	-0.349	0.5	-0.315	0.6445
ENSG00000054967	RELT	RELT tumor necrosis factor receptor [Source:HGNC Symbol;Acc:13764]	-0.354	0.614333	-0.68	0.270833
ENSG00000054983	GALC	galactosylceramidase [Source:HGNC Symbol;Acc:4115]	0.74	0.205333	1	0.0166667
ENSG00000055044	NOP58	NOP58 ribonucleoprotein homolog (yeast) [Source:HGNC Symbol;Acc:29926]	-0.757	0.205167	-0.955	0.046
ENSG00000055070	SZRD1	SUZ RNA binding domain containing 1 [Source:HGNC Symbol;Acc:30232]	-0.646	0.298833	-0.986	0.026
ENSG00000055118	KCNH2	potassium voltage-gated channel, subfamily H (eag-related), member 2 [Source:HGNC Symbol;Acc:6251]	-0.819	0.1445	0.231	0.710667
ENSG00000055130	CUL1	cullin 1 [Source:HGNC Symbol;Acc:2551]	-0.56	0.389333	-0.851	0.121333
ENSG00000055147	FAM114A2	family with sequence similarity 114, member A2 [Source:HGNC Symbol;Acc:1333]	-0.542	0.375667	-0.536	0.407
ENSG00000055163	CYFIP2	cytoplasmic FMR1 interacting protein 2 [Source:HGNC Symbol;Acc:13760]	0.908	0.0751667	0.125	0.908333
ENSG00000055208	TAB2	TGF-beta activated kinase 1/MAP3K7 binding protein 2 [Source:HGNC Symbol;Acc:17075]	-0.171	0.682333	0.09	0.907333
ENSG00000055211	GINM1	glycoprotein integral membrane 1 [Source:HGNC Symbol;Acc:21074]	0.911	0.076	0.967	0.0386667
ENSG00000055332	EIF2AK2	eukaryotic translation initiation factor 2-alpha kinase 2 [Source:HGNC Symbol;Acc:9437]	-0.26	0.670333	-0.722	0.219833
ENSG00000055483	USP36	ubiquitin specific peptidase 36 [Source:HGNC Symbol;Acc:20062]	0.203	0.6145	-0.898	0.0903333
ENSG00000055609	MLL3	myeloid/lymphoid or mixed-lineage leukemia 3 [Source:HGNC Symbol;Acc:13726]	0.186	0.733	-0.817	0.153167
ENSG00000055917	PUM2	pumilio homolog 2 (Drosophila) [Source:HGNC Symbol;Acc:14958]	0.295	0.690333	0.415	0.553167
ENSG00000055950	MRPL43	mitochondrial ribosomal protein L43 [Source:HGNC Symbol;Acc:14517]	-0.431	0.452833	-0.815	0.154
ENSG00000056050	C4orf27	chromosome 4 open reading frame 27 [Source:HGNC Symbol;Acc:26051]	-0.652	0.330333	-0.75	0.209333
ENSG00000056097	ZFR	zinc finger RNA binding protein [Source:HGNC Symbol;Acc:17277]	0.584	0.39	0.337	0.6425
ENSG00000056277	ZNF280C	zinc finger protein 280C [Source:HGNC Symbol;Acc:25955]	-0.451	0.514333	-0.359	0.547667
ENSG00000056558	TRAF1	TNF receptor-associated factor 1 [Source:HGNC Symbol;Acc:12031]	0.472	0.496667	0.881	0.102167
ENSG00000056586	RC3H2	ring finger and CCCH-type domains 2 [Source:HGNC Symbol;Acc:21461]	0.784	0.1975	-0.107	0.916167
ENSG00000056661	PCGF2	polycomb group ring finger 2 [Source:HGNC Symbol;Acc:12929]	0.437	0.4125	0.324	0.5035
ENSG00000056736	IL17RB	interleukin 17 receptor B [Source:HGNC Symbol;Acc:18015]	0.087	0.545667	0.94	0.0566667
ENSG00000056972	TRAF3IP2	TRAF3 interacting protein 2 [Source:HGNC Symbol;Acc:1343]	0.22	0.781	-0.694	0.257333
ENSG00000056998	GYG2	glycogenin 2 [Source:HGNC Symbol;Acc:4700]	0.434	0.536	0.2	0.783333
ENSG00000057019	DCBLD2	discoidin, CUB and LCCL domain containing 2 [Source:HGNC Symbol;Acc:24627]	0.075	0.9625	-0.216	0.739333
ENSG00000057252	SOAT1	sterol O-acyltransferase 1 [Source:HGNC Symbol;Acc:11177]	-0.802	0.163167	-0.798	0.170333
ENSG00000057593	F7	coagulation factor VII (serum prothrombin conversion accelerator) [Source:HGNC Symbol;Acc:3544]	-0.265	0.709167	-0.008	0.839667
ENSG00000057608	GDI2	GDP dissociation inhibitor 2 [Source:HGNC Symbol;Acc:4227]	-0.73	0.225667	-0.944	0.054
ENSG00000057657	PRDM1	PR domain containing 1, with ZNF domain [Source:HGNC Symbol;Acc:9346]	0.029	0.9855	0.826	0.138833
ENSG00000057663	ATG5	autophagy related 5 [Source:HGNC Symbol;Acc:589]	-0.574	0.397667	0.069	0.730667
ENSG00000057757	PITHD1	PITH (C-terminal proteasome-interacting domain of thioredoxin-like) domain containing 1 [Source:HGNC Symbol;Acc:25022]	0.336	0.658833	0.065	0.9675
ENSG00000057935	MTA3	metastasis associated 1 family, member 3 [Source:HGNC Symbol;Acc:23784]	0.517	0.436667	-0.22	0.592
ENSG00000058056	USP13	ubiquitin specific peptidase 13 (isopeptidase T-3) [Source:HGNC Symbol;Acc:12611]	-0.675	0.275167	-0.882	0.0985
ENSG00000058063	ATP11B	ATPase, class VI, type 11B [Source:HGNC Symbol;Acc:13553]	-0.633	0.329333	0.448	0.4885
ENSG00000058085	LAMC2	laminin, gamma 2 [Source:HGNC Symbol;Acc:6493]	0.458	0.490167	0.972	0.0353333
ENSG00000058091	CDK14	cyclin-dependent kinase 14 [Source:HGNC Symbol;Acc:8883]	-0.775	0.1835	-0.114	0.89
ENSG00000058262	SEC61A1	Sec61 alpha 1 subunit (S. cerevisiae) [Source:HGNC Symbol;Acc:18276]	-0.197	0.795833	-0.897	0.093
ENSG00000058272	PPP1R12A	protein phosphatase 1, regulatory subunit 12A [Source:HGNC Symbol;Acc:7618]	-0.315	0.578333	-0.888	0.097
ENSG00000058335	RASGRF1	Ras protein-specific guanine nucleotide-releasing factor 1 [Source:HGNC Symbol;Acc:9875]	0.871	0.1095	0.659	0.314667
ENSG00000058453	CROCC	ciliary rootlet coiled-coil, rootletin [Source:HGNC Symbol;Acc:21299]	-0.404	0.552	-0.358	0.615167
ENSG00000058600	POLR3E	polymerase (RNA) III (DNA directed) polypeptide E (80kD) [Source:HGNC Symbol;Acc:30347]	-0.789	0.1595	-0.667	0.271833
ENSG00000058668	ATP2B4	ATPase, Ca++ transporting, plasma membrane 4 [Source:HGNC Symbol;Acc:817]	0.093	0.9335	-0.518	0.432
ENSG00000058673	ZC3H11A	zinc finger CCCH-type containing 11A [Source:HGNC Symbol;Acc:29093]	-0.196	0.803333	0.965	0.04
ENSG00000058729	RIOK2	RIO kinase 2 (yeast) [Source:HGNC Symbol;Acc:18999]	-0.638	0.320833	-0.721	0.234667
ENSG00000058799	YIPF1	Yip1 domain family, member 1 [Source:HGNC Symbol;Acc:25231]	0.558	0.39	0.791	0.172833
ENSG00000058804	TMEM48	transmembrane protein 48 [Source:HGNC Symbol;Acc:25525]	-0.575	0.373167	-0.639	0.3045
ENSG00000059122	FLYWCH1	FLYWCH-type zinc finger 1 [Source:HGNC Symbol;Acc:25404]	0.336	0.643333	0.429	0.545
ENSG00000059145	UNKL	unkempt homolog (Drosophila)-like [Source:HGNC Symbol;Acc:14184]	0.36	0.576833	0.878	0.100333
ENSG00000059377	TBXAS1	thromboxane A synthase 1 (platelet) [Source:HGNC Symbol;Acc:11609]	0.558	0.390167	-0.589	0.374833
ENSG00000059378	PARP12	poly (ADP-ribose) polymerase family, member 12 [Source:HGNC Symbol;Acc:21919]	0.595	0.354833	-0.953	0.048
ENSG00000059573	ALDH18A1	aldehyde dehydrogenase 18 family, member A1 [Source:HGNC Symbol;Acc:9722]	-0.672	0.2735	-0.964	0.0406667
ENSG00000059588	TARBP1	TAR (HIV-1) RNA binding protein 1 [Source:HGNC Symbol;Acc:11568]	-0.858	0.114833	-0.844	0.127833
ENSG00000059691	PET112	PET112 homolog (yeast) [Source:HGNC Symbol;Acc:8849]	-0.904	0.0855	-0.967	0.0386667
ENSG00000059728	MXD1	MAX dimerization protein 1 [Source:HGNC Symbol;Acc:6761]	0.006	0.866667	0.67	0.277167
ENSG00000059758	CDK17	cyclin-dependent kinase 17 [Source:HGNC Symbol;Acc:8750]	-0.858	0.103167	-0.713	0.228167
ENSG00000059769	DNAJC25	DnaJ (Hsp40) homolog, subfamily C , member 25 [Source:HGNC Symbol;Acc:34187]	-0.322	0.64	0.341	0.644167
ENSG00000059804	SLC2A3	solute carrier family 2 (facilitated glucose transporter), member 3 [Source:HGNC Symbol;Acc:11007]	-0.65	0.2875	0.508	0.449667
ENSG00000059915	PSD	pleckstrin and Sec7 domain containing [Source:HGNC Symbol;Acc:9507]	0.226	0.603833	0.263	0.720167
ENSG00000060069	CTDP1	CTD (carboxy-terminal domain, RNA polymerase II, polypeptide A) phosphatase, subunit 1 [Source:HGNC Symbol;Acc:2498]	0.554	0.403333	-0.855	0.116833
ENSG00000060138	CSDA	cold shock domain protein A [Source:HGNC Symbol;Acc:2428]	-0.89	0.0975	-0.463	0.501
ENSG00000060140	STYK1	serine/threonine/tyrosine kinase 1 [Source:HGNC Symbol;Acc:18889]	0.756	0.198	0.11	0.925167
ENSG00000060237	WNK1	WNK lysine deficient protein kinase 1 [Source:HGNC Symbol;Acc:14540]	0.194	0.8085	0.814	0.149
ENSG00000060303	RPS17P5	ribosomal protein S17 pseudogene 5 [Source:HGNC Symbol;Acc:21352]	-0.014	0.663167	-0.769	0.184
ENSG00000060339	CCAR1	cell division cycle and apoptosis regulator 1 [Source:HGNC Symbol;Acc:24236]	-0.345	0.5875	-0.911	0.076
ENSG00000060491	OGFR	opioid growth factor receptor [Source:HGNC Symbol;Acc:15768]	0.794	0.163	-0.797	0.170333
ENSG00000060642	PIGV	phosphatidylinositol glycan anchor biosynthesis, class V [Source:HGNC Symbol;Acc:26031]	0.615	0.3325	1	0.0166667
ENSG00000060656	PTPRU	protein tyrosine phosphatase, receptor type, U [Source:HGNC Symbol;Acc:9683]	-0.984	0.0273333	0.904	0.077
ENSG00000060688	SNRNP40	small nuclear ribonucleoprotein 40kDa (U5) [Source:HGNC Symbol;Acc:30857]	-0.522	0.448167	-0.695	0.239833
ENSG00000060718	COL11A1	collagen, type XI, alpha 1 [Source:HGNC Symbol;Acc:2186]	0.601	0.326833	-0.118	0.921
ENSG00000060749	QSER1	glutamine and serine rich 1 [Source:HGNC Symbol;Acc:26154]	-0.68	0.2745	-0.88	0.103333
ENSG00000060762	MPC1	mitochondrial pyruvate carrier 1 [Source:HGNC Symbol;Acc:21606]	0.62	0.3165	0.774	0.195333
ENSG00000060971	ACAA1	acetyl-CoA acyltransferase 1 [Source:HGNC Symbol;Acc:82]	0.748	0.211333	-0.594	0.3565
ENSG00000060982	BCAT1	branched chain amino-acid transaminase 1, cytosolic [Source:HGNC Symbol;Acc:976]	-0.129	0.786667	-0.924	0.0673333
ENSG00000061273	HDAC7	histone deacetylase 7 [Source:HGNC Symbol;Acc:14067]	-0.649	0.2995	-0.975	0.0333333
ENSG00000061337	LZTS1	leucine zipper, putative tumor suppressor 1 [Source:HGNC Symbol;Acc:13861]	-0.572	0.380333	-0.963	0.0413333
ENSG00000061656	SPAG4	sperm associated antigen 4 [Source:HGNC Symbol;Acc:11214]	-0.53	0.424667	0.17	0.833333
ENSG00000061676	NCKAP1	NCK-associated protein 1 [Source:HGNC Symbol;Acc:7666]	0.756	0.223	0.805	0.162167
ENSG00000061794	MRPS35	mitochondrial ribosomal protein S35 [Source:HGNC Symbol;Acc:16635]	-0.563	0.400833	-0.824	0.146667
ENSG00000061918	GUCY1B3	guanylate cyclase 1, soluble, beta 3 [Source:HGNC Symbol;Acc:4687]	-0.355	0.612667	0.86	0.113333
ENSG00000061936	SFSWAP	splicing factor, suppressor of white-apricot homolog (Drosophila) [Source:HGNC Symbol;Acc:10790]	-0.57	0.380333	-0.819	0.155167
ENSG00000061938	TNK2	tyrosine kinase, non-receptor, 2 [Source:HGNC Symbol;Acc:19297]	0.286	0.703	0.359	0.600833
ENSG00000061987	MON2	MON2 homolog (S. cerevisiae) [Source:HGNC Symbol;Acc:29177]	-0.316	0.604	-0.775	0.176833
ENSG00000062038	CDH3	cadherin 3, type 1, P-cadherin (placental) [Source:HGNC Symbol;Acc:1762]	-0.362	0.452667	-0.648	0.298333
ENSG00000062194	GPBP1	GC-rich promoter binding protein 1 [Source:HGNC Symbol;Acc:29520]	-0.595	0.370833	0.134	0.633333
ENSG00000062282	DGAT2	diacylglycerol O-acyltransferase 2 [Source:HGNC Symbol;Acc:16940]	-0.604	0.3425	0.11	0.933333
ENSG00000062370	ZFP112	zinc finger protein 112 homolog (mouse) [Source:HGNC Symbol;Acc:13021]	0.463	0.473667	0.293	0.68
ENSG00000062485	CS	citrate synthase [Source:HGNC Symbol;Acc:2422]	-0.591	0.357333	-0.887	0.0973333
ENSG00000062524	LTK	leukocyte receptor tyrosine kinase [Source:HGNC Symbol;Acc:6721]	-0.1	0.95	-0.833	0.139333
ENSG00000062582	MRPS24	mitochondrial ribosomal protein S24 [Source:HGNC Symbol;Acc:14510]	-0.592	0.388333	-0.526	0.423333
ENSG00000062598	ELMO2	engulfment and cell motility 2 [Source:HGNC Symbol;Acc:17233]	0.261	0.7425	0.66	0.291833
ENSG00000062650	WAPAL	wings apart-like homolog (Drosophila) [Source:HGNC Symbol;Acc:23293]	-0.725	0.222833	-0.884	0.0998333
ENSG00000062716	VMP1	vacuole membrane protein 1 [Source:HGNC Symbol;Acc:29559]	0.256	0.7385	0.336	0.660833
ENSG00000062725	APPBP2	amyloid beta precursor protein (cytoplasmic tail) binding protein 2 [Source:HGNC Symbol;Acc:622]	-0.068	0.745833	0.277	0.696333
ENSG00000062822	POLD1	polymerase (DNA directed), delta 1, catalytic subunit [Source:HGNC Symbol;Acc:9175]	-0.572	0.376333	-0.846	0.123833
ENSG00000063046	EIF4B	eukaryotic translation initiation factor 4B [Source:HGNC Symbol;Acc:3285]	-0.523	0.411667	-0.3	0.683333
ENSG00000063127	SLC6A16	solute carrier family 6, member 16 [Source:HGNC Symbol;Acc:13622]	-0.378	0.564	-0.273	0.677333
ENSG00000063169	GLTSCR1	glioma tumor suppressor candidate region gene 1 [Source:HGNC Symbol;Acc:4332]	-0.578	0.377667	-0.854	0.1285
ENSG00000063176	SPHK2	sphingosine kinase 2 [Source:HGNC Symbol;Acc:18859]	0.158	0.851667	-0.181	0.747667
ENSG00000063177	RPL18	ribosomal protein L18 [Source:HGNC Symbol;Acc:10310]	-0.654	0.315667	-0.907	0.0838333
ENSG00000063180	CA11	carbonic anhydrase XI [Source:HGNC Symbol;Acc:1370]	0.158	0.872667	0.289	0.696667
ENSG00000063241	ISOC2	isochorismatase domain containing 2 [Source:HGNC Symbol;Acc:26278]	-0.33	0.616	-0.839	0.1295
ENSG00000063244	U2AF2	U2 small nuclear RNA auxiliary factor 2 [Source:HGNC Symbol;Acc:23156]	-0.609	0.338833	-0.807	0.166
ENSG00000063245	EPN1	epsin 1 [Source:HGNC Symbol;Acc:21604]	-0.019	0.712167	-0.954	0.0473333
ENSG00000063322	MED29	mediator complex subunit 29 [Source:HGNC Symbol;Acc:23074]	0.155	0.856	-0.509	0.433
ENSG00000063438	AHRR	aryl-hydrocarbon receptor repressor [Source:HGNC Symbol;Acc:346]	0.173	0.64	-0.56	0.385
ENSG00000063587	ZNF275	zinc finger protein 275 [Source:HGNC Symbol;Acc:13069]	-0.391	0.483667	-0.624	0.316833
ENSG00000063601	MTMR1	myotubularin related protein 1 [Source:HGNC Symbol;Acc:7449]	-0.134	0.767167	-0.728	0.217333
ENSG00000063660	GPC1	glypican 1 [Source:HGNC Symbol;Acc:4449]	-0.436	0.537	0.955	0.0466667
ENSG00000063761	ADCK1	aarF domain containing kinase 1 [Source:HGNC Symbol;Acc:19038]	0.386	0.582833	-0.292	0.541333
ENSG00000063854	HAGH	hydroxyacylglutathione hydrolase [Source:HGNC Symbol;Acc:4805]	0.667	0.271833	0.872	0.108
ENSG00000063978	RNF4	ring finger protein 4 [Source:HGNC Symbol;Acc:10067]	0.366	0.606167	-0.41	0.5735
ENSG00000064012	CASP8	caspase 8, apoptosis-related cysteine peptidase [Source:HGNC Symbol;Acc:1509]	-0.597	0.3625	-0.589	0.360667
ENSG00000064042	LIMCH1	LIM and calponin homology domains 1 [Source:HGNC Symbol;Acc:29191]	0.135	0.887167	0.892	0.0928333
ENSG00000064102	ASUN	asunder, spermatogenesis regulator homolog (Drosphila) [Source:HGNC Symbol;Acc:20174]	-0.68	0.270333	-0.713	0.244
ENSG00000064115	TM7SF3	transmembrane 7 superfamily member 3 [Source:HGNC Symbol;Acc:23049]	0.374	0.607667	0.195	0.800833
ENSG00000064199	SPA17	sperm autoantigenic protein 17 [Source:HGNC Symbol;Acc:11210]	-0.072	0.6205	-0.848	0.122333
ENSG00000064201	TSPAN32	tetraspanin 32 [Source:HGNC Symbol;Acc:13410]	0.658	0.299333	0.844	0.127333
ENSG00000064205	WISP2	WNT1 inducible signaling pathway protein 2 [Source:HGNC Symbol;Acc:12770]	0.259	0.6185	0.634	0.310333
ENSG00000064225	ST3GAL6	ST3 beta-galactoside alpha-2,3-sialyltransferase 6 [Source:HGNC Symbol;Acc:18080]	0.132	0.654	0.326	0.655667
ENSG00000064270	ATP2C2	ATPase, Ca++ transporting, type 2C, member 2 [Source:HGNC Symbol;Acc:29103]	0.673	0.2885	-0.424	0.530833
ENSG00000064309	CDON	Cdon homolog (mouse) [Source:HGNC Symbol;Acc:17104]	0.119	0.892667	0.883	0.0976667
ENSG00000064313	TAF2	TAF2 RNA polymerase II, TATA box binding protein (TBP)-associated factor, 150kDa [Source:HGNC Symbol;Acc:11536]	-0.681	0.267667	-0.855	0.118833
ENSG00000064393	HIPK2	homeodomain interacting protein kinase 2 [Source:HGNC Symbol;Acc:14402]	0.432	0.555333	0.11	0.91
ENSG00000064419	TNPO3	transportin 3 [Source:HGNC Symbol;Acc:17103]	-0.774	0.190667	-0.849	0.1325
ENSG00000064490	RFXANK	regulatory factor X-associated ankyrin-containing protein [Source:HGNC Symbol;Acc:9987]	-0.624	0.354333	-0.898	0.0903333
ENSG00000064545	TMEM161A	transmembrane protein 161A [Source:HGNC Symbol;Acc:26020]	-0.036	0.68	-0.261	0.564667
ENSG00000064547	LPAR2	lysophosphatidic acid receptor 2 [Source:HGNC Symbol;Acc:3168]	0.368	0.558167	-0.714	0.230167
ENSG00000064601	CTSA	cathepsin A [Source:HGNC Symbol;Acc:9251]	0.6	0.35	0.819	0.136833
ENSG00000064607	SUGP2	SURP and G patch domain containing 2 [Source:HGNC Symbol;Acc:18641]	-0.188	0.663167	-0.703	0.247667
ENSG00000064651	SLC12A2	solute carrier family 12 (sodium/potassium/chloride transporters), member 2 [Source:HGNC Symbol;Acc:10911]	0.64	0.295833	-0.587	0.363833
ENSG00000064652	SNX24	sorting nexin 24 [Source:HGNC Symbol;Acc:21533]	0.122	0.643333	-0.882	0.105333
ENSG00000064666	CNN2	calponin 2 [Source:HGNC Symbol;Acc:2156]	-0.593	0.3565	-0.26	0.736667
ENSG00000064687	ABCA7	ATP-binding cassette, sub-family A (ABC1), member 7 [Source:HGNC Symbol;Acc:37]	0.571	0.392667	0.529	0.425333
ENSG00000064692	SNCAIP	synuclein, alpha interacting protein [Source:HGNC Symbol;Acc:11139]	-0.569	0.379333	-0.48	0.4805
ENSG00000064703	DDX20	DEAD (Asp-Glu-Ala-Asp) box polypeptide 20 [Source:HGNC Symbol;Acc:2743]	0.897	0.0918333	-0.65	0.313833
ENSG00000064726	BTBD1	BTB (POZ) domain containing 1 [Source:HGNC Symbol;Acc:1120]	0.183	0.809167	-0.009	0.623667
ENSG00000064763	FAR2	fatty acyl CoA reductase 2 [Source:HGNC Symbol;Acc:25531]	0.568	0.384667	-0.51	0.447333
ENSG00000064787	BCAS1	breast carcinoma amplified sequence 1 [Source:HGNC Symbol;Acc:974]	0.067	0.621333	0.687	0.262833
ENSG00000064932	SBNO2	strawberry notch homolog 2 (Drosophila) [Source:HGNC Symbol;Acc:29158]	-0.626	0.316	-0.916	0.0726667
ENSG00000064933	PMS1	PMS1 postmeiotic segregation increased 1 (S. cerevisiae) [Source:HGNC Symbol;Acc:9121]	-0.851	0.1225	-0.422	0.524833
ENSG00000064961	HMG20B	high mobility group 20B [Source:HGNC Symbol;Acc:5002]	0.355	0.448667	-0.882	0.1005
ENSG00000064989	CALCRL	calcitonin receptor-like [Source:HGNC Symbol;Acc:16709]	-0.317	0.672333	-0.483	0.467
ENSG00000064995	TAF11	TAF11 RNA polymerase II, TATA box binding protein (TBP)-associated factor, 28kDa [Source:HGNC Symbol;Acc:11544]	-0.471	0.506667	-0.234	0.722167
ENSG00000064999	ANKS1A	ankyrin repeat and sterile alpha motif domain containing 1A [Source:HGNC Symbol;Acc:20961]	0.234	0.751167	-0.589	0.359
ENSG00000065000	AP3D1	adaptor-related protein complex 3, delta 1 subunit [Source:HGNC Symbol;Acc:568]	-0.169	0.722667	-0.831	0.146
ENSG00000065029	ZNF76	zinc finger protein 76 [Source:HGNC Symbol;Acc:13149]	0.609	0.338333	0.388	0.5675
ENSG00000065054	SLC9A3R2	solute carrier family 9, subfamily A (NHE3, cation proton antiporter 3), member 3 regulator 2 [Source:HGNC Symbol;Acc:11076]	0.556	0.406667	-0.301	0.674333
ENSG00000065057	NTHL1	nth endonuclease III-like 1 (E. coli) [Source:HGNC Symbol;Acc:8028]	-0.088	0.6455	-0.53	0.424667
ENSG00000065060	UHRF1BP1	UHRF1 binding protein 1 [Source:HGNC Symbol;Acc:21216]	0.196	0.696	0.27	0.724333
ENSG00000065135	GNAI3	guanine nucleotide binding protein (G protein), alpha inhibiting activity polypeptide 3 [Source:HGNC Symbol;Acc:4387]	-0.622	0.323333	-0.962	0.042
ENSG00000065150	IPO5	importin 5 [Source:HGNC Symbol;Acc:6402]	-0.626	0.320167	0.058	0.926667
ENSG00000065154	OAT	ornithine aminotransferase [Source:HGNC Symbol;Acc:8091]	-0.511	0.451333	0.762	0.210833
ENSG00000065183	WDR3	WD repeat domain 3 [Source:HGNC Symbol;Acc:12755]	-0.553	0.396	-0.869	0.1125
ENSG00000065243	PKN2	protein kinase N2 [Source:HGNC Symbol;Acc:9406]	-0.439	0.482	0.012	0.816667
ENSG00000065268	WDR18	WD repeat domain 18 [Source:HGNC Symbol;Acc:17956]	-0.39	0.584333	-0.964	0.0406667
ENSG00000065308	TRAM2	translocation associated membrane protein 2 [Source:HGNC Symbol;Acc:16855]	-0.513	0.437	-0.895	0.0925
ENSG00000065320	NTN1	netrin 1 [Source:HGNC Symbol;Acc:8029]	0.462	0.503	0.822	0.149833
ENSG00000065328	MCM10	minichromosome maintenance complex component 10 [Source:HGNC Symbol;Acc:18043]	-0.58	0.367	-0.802	0.165167
ENSG00000065357	DGKA	diacylglycerol kinase, alpha 80kDa [Source:HGNC Symbol;Acc:2849]	0.281	0.701	0.119	0.828333
ENSG00000065361	ERBB3	v-erb-b2 erythroblastic leukemia viral oncogene homolog 3 (avian) [Source:HGNC Symbol;Acc:3431]	-0.614	0.352333	-0.746	0.191833
ENSG00000065413	ANKRD44	ankyrin repeat domain 44 [Source:HGNC Symbol;Acc:25259]	0.537	0.438667	-0.379	0.615
ENSG00000065427	KARS	lysyl-tRNA synthetase [Source:HGNC Symbol;Acc:6215]	-0.462	0.509	-0.981	0.0293333
ENSG00000065457	ADAT1	adenosine deaminase, tRNA-specific 1 [Source:HGNC Symbol;Acc:228]	0.39	0.569167	-0.622	0.324333
ENSG00000065485	PDIA5	protein disulfide isomerase family A, member 5 [Source:HGNC Symbol;Acc:24811]	-0.151	0.767	0.225	0.757167
ENSG00000065491	TBC1D22B	TBC1 domain family, member 22B [Source:HGNC Symbol;Acc:21602]	0.015	0.917167	0.284	0.704667
ENSG00000065518	NDUFB4	NADH dehydrogenase (ubiquinone) 1 beta subcomplex, 4, 15kDa [Source:HGNC Symbol;Acc:7699]	-0.452	0.469167	-0.075	0.772667
ENSG00000065526	SPEN	spen homolog, transcriptional regulator (Drosophila) [Source:HGNC Symbol;Acc:17575]	-0.591	0.357667	-0.863	0.1145
ENSG00000065534	MYLK	myosin light chain kinase [Source:HGNC Symbol;Acc:7590]	0.489	0.484167	0.394	0.584167
ENSG00000065548	ZC3H15	zinc finger CCCH-type containing 15 [Source:HGNC Symbol;Acc:29528]	-0.843	0.136	-0.924	0.0663333
ENSG00000065559	MAP2K4	mitogen-activated protein kinase kinase 4 [Source:HGNC Symbol;Acc:6844]	-0.44	0.529	-0.338	0.644833
ENSG00000065600	TMEM206	transmembrane protein 206 [Source:HGNC Symbol;Acc:25593]	-0.167	0.791167	0.567	0.388333
ENSG00000065613	SLK	STE20-like kinase [Source:HGNC Symbol;Acc:11088]	0.318	0.680333	-0.352	0.626333
ENSG00000065615	CYB5R4	cytochrome b5 reductase 4 [Source:HGNC Symbol;Acc:20147]	-0.744	0.225667	0.575	0.382333
ENSG00000065621	GSTO2	glutathione S-transferase omega 2 [Source:HGNC Symbol;Acc:23064]	-0.12	0.763167	-0.772	0.188833
ENSG00000065665	SEC61A2	Sec61 alpha 2 subunit (S. cerevisiae) [Source:HGNC Symbol;Acc:17702]	-0.082	0.695667	0.718	0.236833
ENSG00000065717	TLE2	transducin-like enhancer of split 2 (E(sp1) homolog, Drosophila) [Source:HGNC Symbol;Acc:11838]	-0.86	0.107167	0.79	0.178667
ENSG00000065802	ASB1	ankyrin repeat and SOCS box containing 1 [Source:HGNC Symbol;Acc:16011]	-0.78	0.191833	-0.061	0.856833
ENSG00000065809	FAM107B	family with sequence similarity 107, member B [Source:HGNC Symbol;Acc:23726]	-0.718	0.219833	-0.876	0.101333
ENSG00000065833	ME1	malic enzyme 1, NADP(+)-dependent, cytosolic [Source:HGNC Symbol;Acc:6983]	-0.164	0.843667	0.499	0.453167
ENSG00000065882	TBC1D1	TBC1 (tre-2/USP6, BUB2, cdc16) domain family, member 1 [Source:HGNC Symbol;Acc:11578]	0.346	0.600667	-0.477	0.462833
ENSG00000065883	CDK13	cyclin-dependent kinase 13 [Source:HGNC Symbol;Acc:1733]	0.39	0.525833	-0.317	0.670667
ENSG00000065911	MTHFD2	methylenetetrahydrofolate dehydrogenase (NADP+ dependent) 2, methenyltetrahydrofolate cyclohydrolase [Source:HGNC Symbol;Acc:7434]	-0.3	0.683333	-0.232	0.768667
ENSG00000065923	SLC9A7	solute carrier family 9, subfamily A (NHE7, cation proton antiporter 7), member 7 [Source:HGNC Symbol;Acc:17123]	0.546	0.432833	0.398	0.563333
ENSG00000065970	FOXJ2	forkhead box J2 [Source:HGNC Symbol;Acc:24818]	-0.16	0.577	-0.839	0.133333
ENSG00000065978	YBX1	Y box binding protein 1 [Source:HGNC Symbol;Acc:8014]	-0.606	0.3665	-0.871	0.109
ENSG00000065989	PDE4A	phosphodiesterase 4A, cAMP-specific [Source:HGNC Symbol;Acc:8780]	0.713	0.2435	0.805	0.162333
ENSG00000066027	PPP2R5A	protein phosphatase 2, regulatory subunit B', alpha [Source:HGNC Symbol;Acc:9309]	-0.293	0.646167	-0.593	0.352833
ENSG00000066044	ELAVL1	ELAV (embryonic lethal, abnormal vision, Drosophila)-like 1 (Hu antigen R) [Source:HGNC Symbol;Acc:3312]	-0.505	0.450667	-0.463	0.505833
ENSG00000066056	TIE1	tyrosine kinase with immunoglobulin-like and EGF-like domains 1 [Source:HGNC Symbol;Acc:11809]	-0.756	0.210833	-0.34	0.5145
ENSG00000066084	DIP2B	DIP2 disco-interacting protein 2 homolog B (Drosophila) [Source:HGNC Symbol;Acc:29284]	-0.02	0.6375	-0.852	0.121333
ENSG00000066117	SMARCD1	SWI/SNF related, matrix associated, actin dependent regulator of chromatin, subfamily d, member 1 [Source:HGNC Symbol;Acc:11106]	-0.796	0.152	-0.961	0.0426667
ENSG00000066135	KDM4A	lysine (K)-specific demethylase 4A [Source:HGNC Symbol;Acc:22978]	-0.387	0.581667	-0.767	0.183667
ENSG00000066136	NFYC	nuclear transcription factor Y, gamma [Source:HGNC Symbol;Acc:7806]	-0.435	0.520667	-0.739	0.218667
ENSG00000066230	SLC9A3	solute carrier family 9, subfamily A (NHE3, cation proton antiporter 3), member 3 [Source:HGNC Symbol;Acc:11073]	0.65	0.325833	-0.668	0.2825
ENSG00000066279	ASPM	asp (abnormal spindle) homolog, microcephaly associated (Drosophila) [Source:HGNC Symbol;Acc:19048]	-0.542	0.407167	-0.924	0.0673333
ENSG00000066294	CD84	CD84 molecule [Source:HGNC Symbol;Acc:1704]	-0.25	0.582833	0.226	0.592
ENSG00000066322	ELOVL1	ELOVL fatty acid elongase 1 [Source:HGNC Symbol;Acc:14418]	0.268	0.591	-0.922	0.07
ENSG00000066379	ZNRD1	zinc ribbon domain containing 1 [Source:HGNC Symbol;Acc:13182]	-0.603	0.369667	-0.771	0.190667
ENSG00000066405	CLDN18	claudin 18 [Source:HGNC Symbol;Acc:2039]	-0.016	0.605833	-0.102	0.635833
ENSG00000066422	ZBTB11	zinc finger and BTB domain containing 11 [Source:HGNC Symbol;Acc:16740]	0.011	0.586167	-0.297	0.605333
ENSG00000066427	ATXN3	ataxin 3 [Source:HGNC Symbol;Acc:7106]	0.025	0.766333	-0.334	0.6425
ENSG00000066455	GOLGA5	golgin A5 [Source:HGNC Symbol;Acc:4428]	-0.459	0.479167	-0.732	0.2235
ENSG00000066468	FGFR2	fibroblast growth factor receptor 2 [Source:HGNC Symbol;Acc:3689]	0.339	0.5065	0.308	0.5455
ENSG00000066557	LRRC40	leucine rich repeat containing 40 [Source:HGNC Symbol;Acc:26004]	-0.615	0.338833	-0.93	0.0633333
ENSG00000066583	ISOC1	isochorismatase domain containing 1 [Source:HGNC Symbol;Acc:24254]	-0.113	0.894333	-0.253	0.676833
ENSG00000066629	EML1	echinoderm microtubule associated protein like 1 [Source:HGNC Symbol;Acc:3330]	0.592	0.357833	0.07	0.965
ENSG00000066651	TRMT11	tRNA methyltransferase 11 homolog (S. cerevisiae) [Source:HGNC Symbol;Acc:21080]	-0.48	0.501833	0.205	0.735333
ENSG00000066654	THUMPD1	THUMP domain containing 1 [Source:HGNC Symbol;Acc:23807]	-0.243	0.643167	-0.656	0.298
ENSG00000066697	MSANTD3	Myb/SANT-like DNA-binding domain containing 3 [Source:HGNC Symbol;Acc:23370]	0.047	0.626833	-0.578	0.3795
ENSG00000066739	ATG2B	autophagy related 2B [Source:HGNC Symbol;Acc:20187]	0.23	0.754	-0.258	0.735833
ENSG00000066777	ARFGEF1	ADP-ribosylation factor guanine nucleotide-exchange factor 1 (brefeldin A-inhibited) [Source:HGNC Symbol;Acc:15772]	0.498	0.473333	0.669	0.2695
ENSG00000066813	ACSM2B	acyl-CoA synthetase medium-chain family member 2B [Source:HGNC Symbol;Acc:30931]	0.01	0.588333	0.503	0.433333
ENSG00000066827	ZFAT	zinc finger and AT hook domain containing [Source:HGNC Symbol;Acc:19899]	0.308	0.688167	-0.158	0.720333
ENSG00000066855	MTFR1	mitochondrial fission regulator 1 [Source:HGNC Symbol;Acc:29510]	-0.438	0.502333	-0.738	0.214667
ENSG00000066923	STAG3	stromal antigen 3 [Source:HGNC Symbol;Acc:11356]	0.001	0.5645	-0.205	0.646167
ENSG00000066926	FECH	ferrochelatase [Source:HGNC Symbol;Acc:3647]	-0.215	0.794333	-0.58	0.399333
ENSG00000066933	MYO9A	myosin IXA [Source:HGNC Symbol;Acc:7608]	-0.007	0.585333	-0.738	0.212833
ENSG00000067048	DDX3Y	DEAD (Asp-Glu-Ala-Asp) box polypeptide 3, Y-linked [Source:HGNC Symbol;Acc:2699]	-0.316	0.637167	0.463	0.478
ENSG00000067057	PFKP	phosphofructokinase, platelet [Source:HGNC Symbol;Acc:8878]	-0.635	0.309167	-0.674	0.263667
ENSG00000067064	IDI1	isopentenyl-diphosphate delta isomerase 1 [Source:HGNC Symbol;Acc:5387]	-0.354	0.623333	0.579	0.368667
ENSG00000067066	SP100	SP100 nuclear antigen [Source:HGNC Symbol;Acc:11206]	0.448	0.5245	0.582	0.377
ENSG00000067082	KLF6	Kruppel-like factor 6 [Source:HGNC Symbol;Acc:2235]	-0.337	0.621667	-0.7	0.233333
ENSG00000067113	PPAP2A	phosphatidic acid phosphatase type 2A [Source:HGNC Symbol;Acc:9228]	0.616	0.332667	0.882	0.105
ENSG00000067141	NEO1	neogenin 1 [Source:HGNC Symbol;Acc:7754]	0.907	0.0838333	0.962	0.042
ENSG00000067167	TRAM1	translocation associated membrane protein 1 [Source:HGNC Symbol;Acc:20568]	0.958	0.0435	0.733	0.200333
ENSG00000067177	PHKA1	phosphorylase kinase, alpha 1 (muscle) [Source:HGNC Symbol;Acc:8925]	0.42	0.5565	0.96	0.0433333
ENSG00000067182	TNFRSF1A	tumor necrosis factor receptor superfamily, member 1A [Source:HGNC Symbol;Acc:11916]	0.723	0.244667	0.185	0.727167
ENSG00000067191	CACNB1	calcium channel, voltage-dependent, beta 1 subunit [Source:HGNC Symbol;Acc:1401]	-0.076	0.9005	0.019	0.647833
ENSG00000067208	EVI5	ecotropic viral integration site 5 [Source:HGNC Symbol;Acc:3501]	0.391	0.587167	0.535	0.399333
ENSG00000067221	STOML1	stomatin (EPB72)-like 1 [Source:HGNC Symbol;Acc:14560]	0.387	0.603167	0.366	0.621333
ENSG00000067225	PKM	pyruvate kinase, muscle [Source:HGNC Symbol;Acc:9021]	-0.103	0.905833	-0.7	0.233333
ENSG00000067248	DHX29	DEAH (Asp-Glu-Ala-His) box polypeptide 29 [Source:HGNC Symbol;Acc:15815]	0.373	0.561667	-0.644	0.2945
ENSG00000067334	DNTTIP2	deoxynucleotidyltransferase, terminal, interacting protein 2 [Source:HGNC Symbol;Acc:24013]	-0.504	0.41	-0.884	0.0928333
ENSG00000067365	METTL22	methyltransferase like 22 [Source:HGNC Symbol;Acc:28368]	-0.492	0.470167	-0.846	0.129833
ENSG00000067369	TP53BP1	tumor protein p53 binding protein 1 [Source:HGNC Symbol;Acc:11999]	0.258	0.559833	-0.826	0.146
ENSG00000067445	TRO	trophinin [Source:HGNC Symbol;Acc:12326]	-0.239	0.761667	-0.117	0.799333
ENSG00000067533	RRP15	ribosomal RNA processing 15 homolog (S. cerevisiae) [Source:HGNC Symbol;Acc:24255]	-0.434	0.548833	-0.467	0.489833
ENSG00000067560	RHOA	ras homolog family member A [Source:HGNC Symbol;Acc:667]	0.111	0.738333	-0.697	0.266833
ENSG00000067596	DHX8	DEAH (Asp-Glu-Ala-His) box polypeptide 8 [Source:HGNC Symbol;Acc:2749]	0.438	0.510167	-0.874	0.107667
ENSG00000067601	PMS2P4	postmeiotic segregation increased 2 pseudogene 4 [Source:HGNC Symbol;Acc:9129]	0.074	0.582667	-0.129	0.545333
ENSG00000067606	PRKCZ	protein kinase C, zeta [Source:HGNC Symbol;Acc:9412]	0.349	0.616667	0.111	0.915333
ENSG00000067646	ZFY	zinc finger protein, Y-linked [Source:HGNC Symbol;Acc:12870]	0.127	0.669667	-0.563	0.3855
ENSG00000067704	IARS2	isoleucyl-tRNA synthetase 2, mitochondrial [Source:HGNC Symbol;Acc:29685]	0.113	0.905	-0.802	0.168167
ENSG00000067715	SYT1	synaptotagmin I [Source:HGNC Symbol;Acc:11509]	0.112	0.815333	0.99	0.0233333
ENSG00000067798	NAV3	neuron navigator 3 [Source:HGNC Symbol;Acc:15998]	0.549	0.397167	0.01	0.826833
ENSG00000067829	IDH3G	isocitrate dehydrogenase 3 (NAD+) gamma [Source:HGNC Symbol;Acc:5386]	-0.132	0.595833	-0.983	0.028
ENSG00000067836	ROGDI	rogdi homolog (Drosophila) [Source:HGNC Symbol;Acc:29478]	0.625	0.323333	-0.052	0.974
ENSG00000067840	PDZD4	PDZ domain containing 4 [Source:HGNC Symbol;Acc:21167]	0.464	0.43	0.754	0.191833
ENSG00000067900	ROCK1	Rho-associated, coiled-coil containing protein kinase 1 [Source:HGNC Symbol;Acc:10251]	0.162	0.853667	0.584	0.366833
ENSG00000067955	CBFB	core-binding factor, beta subunit [Source:HGNC Symbol;Acc:1539]	-0.649	0.297167	-0.871	0.110667
ENSG00000067992	PDK3	pyruvate dehydrogenase kinase, isozyme 3 [Source:HGNC Symbol;Acc:8811]	-0.301	0.507333	-0.032	0.929
ENSG00000068001	HYAL2	hyaluronoglucosaminidase 2 [Source:HGNC Symbol;Acc:5321]	-0.09	0.764667	-0.415	0.535333
ENSG00000068024	HDAC4	histone deacetylase 4 [Source:HGNC Symbol;Acc:14063]	-0.271	0.713333	-0.489	0.474833
ENSG00000068028	RASSF1	Ras association (RalGDS/AF-6) domain family member 1 [Source:HGNC Symbol;Acc:9882]	-0.411	0.563333	0.024	0.988
ENSG00000068078	FGFR3	fibroblast growth factor receptor 3 [Source:HGNC Symbol;Acc:3690]	-0.463	0.494667	-0.09	0.740333
ENSG00000068079	IFI35	interferon-induced protein 35 [Source:HGNC Symbol;Acc:5399]	-0.12	0.899667	-0.949	0.0503333
ENSG00000068097	HEATR6	HEAT repeat containing 6 [Source:HGNC Symbol;Acc:24076]	-0.447	0.522167	-0.696	0.255667
ENSG00000068120	COASY	CoA synthase [Source:HGNC Symbol;Acc:29932]	-0.406	0.485	-0.862	0.114833
ENSG00000068137	PLEKHH3	pleckstrin homology domain containing, family H (with MyTH4 domain) member 3 [Source:HGNC Symbol;Acc:26105]	-0.478	0.4855	-0.332	0.657167
ENSG00000068305	MEF2A	myocyte enhancer factor 2A [Source:HGNC Symbol;Acc:6993]	0.236	0.686167	0.896	0.0946667
ENSG00000068308	OTUD5	OTU domain containing 5 [Source:HGNC Symbol;Acc:25402]	0.354	0.642333	-0.851	0.13
ENSG00000068323	TFE3	transcription factor binding to IGHM enhancer 3 [Source:HGNC Symbol;Acc:11752]	0.4	0.56	-0.009	0.905667
ENSG00000068354	TBC1D25	TBC1 domain family, member 25 [Source:HGNC Symbol;Acc:8092]	0.049	0.629833	-0.622	0.337833
ENSG00000068366	ACSL4	acyl-CoA synthetase long-chain family member 4 [Source:HGNC Symbol;Acc:3571]	-0.074	0.881667	-0.652	0.289333
ENSG00000068383	INPP5A	inositol polyphosphate-5-phosphatase, 40kDa [Source:HGNC Symbol;Acc:6076]	0.276	0.715333	0.575	0.382333
ENSG00000068394	GPKOW	G patch domain and KOW motifs [Source:HGNC Symbol;Acc:30677]	-0.319	0.618833	-0.856	0.118167
ENSG00000068400	GRIPAP1	GRIP1 associated protein 1 [Source:HGNC Symbol;Acc:18706]	0.061	0.859833	-0.694	0.252
ENSG00000068438	FTSJ1	FtsJ RNA methyltransferase homolog 1 (E. coli) [Source:HGNC Symbol;Acc:13254]	-0.55	0.423833	-0.965	0.04
ENSG00000068489	PRR11	proline rich 11 [Source:HGNC Symbol;Acc:25619]	-0.5	0.45	-0.869	0.110833
ENSG00000068650	ATP11A	ATPase, class VI, type 11A [Source:HGNC Symbol;Acc:13552]	0.733	0.247667	0.722	0.242
ENSG00000068654	POLR1A	polymerase (RNA) I polypeptide A, 194kDa [Source:HGNC Symbol;Acc:17264]	-0.489	0.486333	-0.843	0.135833
ENSG00000068697	LAPTM4A	lysosomal protein transmembrane 4 alpha [Source:HGNC Symbol;Acc:6924]	0.576	0.375333	0.88	0.103333
ENSG00000068724	TTC7A	tetratricopeptide repeat domain 7A [Source:HGNC Symbol;Acc:19750]	-0.216	0.651833	-0.685	0.256
ENSG00000068745	IP6K2	inositol hexakisphosphate kinase 2 [Source:HGNC Symbol;Acc:17313]	0.113	0.654	-0.865	0.107167
ENSG00000068784	SRBD1	S1 RNA binding domain 1 [Source:HGNC Symbol;Acc:25521]	-0.736	0.223667	-0.85	0.121833
ENSG00000068793	CYFIP1	cytoplasmic FMR1 interacting protein 1 [Source:HGNC Symbol;Acc:13759]	0.066	0.870333	-0.901	0.0881667
ENSG00000068796	KIF2A	kinesin heavy chain member 2A [Source:HGNC Symbol;Acc:6318]	-0.688	0.269167	-0.741	0.212167
ENSG00000068831	RASGRP2	RAS guanyl releasing protein 2 (calcium and DAG-regulated) [Source:HGNC Symbol;Acc:9879]	-0.508	0.4635	0.677	0.260167
ENSG00000068878	PSME4	proteasome (prosome, macropain) activator subunit 4 [Source:HGNC Symbol;Acc:20635]	-0.196	0.771333	-0.907	0.0838333
ENSG00000068885	IFT80	intraflagellar transport 80 homolog (Chlamydomonas) [Source:HGNC Symbol;Acc:29262]	-0.563	0.375667	0.835	0.1385
ENSG00000068903	SIRT2	sirtuin 2 [Source:HGNC Symbol;Acc:10886]	0.22	0.777167	0.657	0.290667
ENSG00000068912	ERLEC1	endoplasmic reticulum lectin 1 [Source:HGNC Symbol;Acc:25222]	0.677	0.276667	0.967	0.0386667
ENSG00000068971	PPP2R5B	protein phosphatase 2, regulatory subunit B', beta [Source:HGNC Symbol;Acc:9310]	0.327	0.648	0.792	0.1715
ENSG00000068976	PYGM	phosphorylase, glycogen, muscle [Source:HGNC Symbol;Acc:9726]	-0.275	0.5225	0.325	0.5195
ENSG00000069011	PITX1	paired-like homeodomain 1 [Source:HGNC Symbol;Acc:9004]	0.509	0.457667	-0.036	0.907333
ENSG00000069020	MAST4	microtubule associated serine/threonine kinase family member 4 [Source:HGNC Symbol;Acc:19037]	0.461	0.515	0.281	0.693333
ENSG00000069188	SDK2	sidekick cell adhesion molecule 2 [Source:HGNC Symbol;Acc:19308]	0.268	0.693667	0.957	0.0453333
ENSG00000069248	NUP133	nucleoporin 133kDa [Source:HGNC Symbol;Acc:18016]	-0.284	0.575333	-0.795	0.184
ENSG00000069275	NUCKS1	nuclear casein kinase and cyclin-dependent kinase substrate 1 [Source:HGNC Symbol;Acc:29923]	-0.303	0.688667	-0.319	0.651667
ENSG00000069329	VPS35	vacuolar protein sorting 35 homolog (S. cerevisiae) [Source:HGNC Symbol;Acc:13487]	0.069	0.749	-0.687	0.277167
ENSG00000069345	DNAJA2	DnaJ (Hsp40) homolog, subfamily A, member 2 [Source:HGNC Symbol;Acc:14884]	0.497	0.483	-0.047	0.613167
ENSG00000069399	BCL3	B-cell CLL/lymphoma 3 [Source:HGNC Symbol;Acc:998]	-0.381	0.592167	0.214	0.618
ENSG00000069424	KCNAB2	potassium voltage-gated channel, shaker-related subfamily, beta member 2 [Source:HGNC Symbol;Acc:6229]	0.274	0.7285	0.81	0.158
ENSG00000069431	ABCC9	ATP-binding cassette, sub-family C (CFTR/MRP), member 9 [Source:HGNC Symbol;Acc:60]	-0.309	0.688333	0.96	0.0433333
ENSG00000069493	CLEC2D	C-type lectin domain family 2, member D [Source:HGNC Symbol;Acc:14351]	-0.29	0.673333	0.926	0.0641667
ENSG00000069509	FUNDC1	FUN14 domain containing 1 [Source:HGNC Symbol;Acc:28746]	0.002	0.525667	0.153	0.754333
ENSG00000069667	RORA	RAR-related orphan receptor A [Source:HGNC Symbol;Acc:10258]	0.147	0.868333	1	0.0166667
ENSG00000069696	DRD4	dopamine receptor D4 [Source:HGNC Symbol;Acc:3025]	-0.189	0.694	0.664	0.291667
ENSG00000069702	TGFBR3	transforming growth factor, beta receptor III [Source:HGNC Symbol;Acc:11774]	-0.392	0.5695	0.5	0.45
ENSG00000069712	KIAA1107	KIAA1107 [Source:HGNC Symbol;Acc:29192]	-0.889	0.0866667	0.616	0.340833
ENSG00000069812	HES2	hairy and enhancer of split 2 (Drosophila) [Source:HGNC Symbol;Acc:16005]	-0.137	0.529833	0.351	0.57
ENSG00000069849	ATP1B3	ATPase, Na+/K+ transporting, beta 3 polypeptide [Source:HGNC Symbol;Acc:806]	0.434	0.554333	0.154	0.868
ENSG00000069869	NEDD4	neural precursor cell expressed, developmentally down-regulated 4, E3 ubiquitin protein ligase [Source:HGNC Symbol;Acc:7727]	0.275	0.721833	-0.611	0.337167
ENSG00000069943	PIGB	phosphatidylinositol glycan anchor biosynthesis, class B [Source:HGNC Symbol;Acc:8959]	0.554	0.396	0.879	0.0918333
ENSG00000069956	MAPK6	mitogen-activated protein kinase 6 [Source:HGNC Symbol;Acc:6879]	-0.512	0.468667	-0.2	0.783333
ENSG00000069966	GNB5	guanine nucleotide binding protein (G protein), beta 5 [Source:HGNC Symbol;Acc:4401]	0.776	0.166333	0.158	0.872667
ENSG00000069974	RAB27A	RAB27A, member RAS oncogene family [Source:HGNC Symbol;Acc:9766]	-0.714	0.232167	-1	0.0166667
ENSG00000069998	CECR5	cat eye syndrome chromosome region, candidate 5 [Source:HGNC Symbol;Acc:1843]	-0.548	0.4295	-0.931	0.061
ENSG00000070010	UFD1L	ubiquitin fusion degradation 1 like (yeast) [Source:HGNC Symbol;Acc:12520]	0.395	0.576667	-0.868	0.111833
ENSG00000070018	LRP6	low density lipoprotein receptor-related protein 6 [Source:HGNC Symbol;Acc:6698]	0.681	0.281833	0.556	0.391667
ENSG00000070047	PHRF1	PHD and ring finger domains 1 [Source:HGNC Symbol;Acc:24351]	0.088	0.777833	-0.728	0.226333
ENSG00000070061	IKBKAP	inhibitor of kappa light polypeptide gene enhancer in B-cells, kinase complex-associated protein [Source:HGNC Symbol;Acc:5959]	0.125	0.900667	-0.362	0.58
ENSG00000070081	NUCB2	nucleobindin 2 [Source:HGNC Symbol;Acc:8044]	-0.371	0.565	0.099	0.922167
ENSG00000070087	PFN2	profilin 2 [Source:HGNC Symbol;Acc:8882]	-0.158	0.6885	-0.698	0.2515
ENSG00000070159	PTPN3	protein tyrosine phosphatase, non-receptor type 3 [Source:HGNC Symbol;Acc:9655]	-0.16	0.765833	-0.589	0.3575
ENSG00000070182	SPTB	spectrin, beta, erythrocytic [Source:HGNC Symbol;Acc:11274]	-0.716	0.238667	-0.732	0.224667
ENSG00000070190	DAPP1	dual adaptor of phosphotyrosine and 3-phosphoinositides [Source:HGNC Symbol;Acc:16500]	0.158	0.558833	0.9	0.0795
ENSG00000070214	SLC44A1	solute carrier family 44, member 1 [Source:HGNC Symbol;Acc:18798]	-0.474	0.466167	-0.266	0.717333
ENSG00000070269	C14orf101	chromosome 14 open reading frame 101 [Source:HGNC Symbol;Acc:20185]	-0.083	0.743833	0.465	0.483167
ENSG00000070366	SMG6	smg-6 homolog, nonsense mediated mRNA decay factor (C. elegans) [Source:HGNC Symbol;Acc:17809]	0.619	0.354833	-0.717	0.237
ENSG00000070367	EXOC5	exocyst complex component 5 [Source:HGNC Symbol;Acc:10696]	-0.615	0.329	0.767	0.194167
ENSG00000070371	CLTCL1	clathrin, heavy chain-like 1 [Source:HGNC Symbol;Acc:2093]	0.217	0.6425	-0.668	0.285
ENSG00000070404	FSTL3	follistatin-like 3 (secreted glycoprotein) [Source:HGNC Symbol;Acc:3973]	0.126	0.784667	-0.1	0.95
ENSG00000070413	DGCR2	DiGeorge syndrome critical region gene 2 [Source:HGNC Symbol;Acc:2845]	0.471	0.478833	0.296	0.595833
ENSG00000070423	RNF126	ring finger protein 126 [Source:HGNC Symbol;Acc:21151]	-0.183	0.657	-0.957	0.0453333
ENSG00000070444	MNT	MAX binding protein [Source:HGNC Symbol;Acc:7188]	-0.231	0.6895	-0.424	0.5295
ENSG00000070476	ZXDC	ZXD family zinc finger C [Source:HGNC Symbol;Acc:28160]	0.025	0.648667	-0.84	0.132
ENSG00000070495	JMJD6	jumonji domain containing 6 [Source:HGNC Symbol;Acc:19355]	-0.957	0.0453333	-0.514	0.441333
ENSG00000070501	POLB	polymerase (DNA directed), beta [Source:HGNC Symbol;Acc:9174]	-0.846	0.126167	-0.39	0.573333
ENSG00000070540	WIPI1	WD repeat domain, phosphoinositide interacting 1 [Source:HGNC Symbol;Acc:25471]	0.5	0.45	0.048	0.865167
ENSG00000070601	FRMPD1	FERM and PDZ domain containing 1 [Source:HGNC Symbol;Acc:29159]	-0.084	0.6295	0.42	0.531667
ENSG00000070610	GBA2	glucosidase, beta (bile acid) 2 [Source:HGNC Symbol;Acc:18986]	-0.482	0.472	-0.766	0.191333
ENSG00000070614	NDST1	N-deacetylase/N-sulfotransferase (heparan glucosaminyl) 1 [Source:HGNC Symbol;Acc:7680]	0.251	0.658333	0.164	0.774
ENSG00000070669	ASNS	asparagine synthetase (glutamine-hydrolyzing) [Source:HGNC Symbol;Acc:753]	-0.126	0.915333	-0.048	0.915333
ENSG00000070718	AP3M2	adaptor-related protein complex 3, mu 2 subunit [Source:HGNC Symbol;Acc:570]	0.666	0.280167	0.151	0.858
ENSG00000070731	ST6GALNAC2	ST6 (alpha-N-acetyl-neuraminyl-2,3-beta-galactosyl-1,3)-N-acetylgalactosaminide alpha-2,6-sialyltransferase 2 [Source:HGNC Symbol;Acc:10867]	0.598	0.350667	-0.198	0.6275
ENSG00000070756	PABPC1	poly(A) binding protein, cytoplasmic 1 [Source:HGNC Symbol;Acc:8554]	-0.679	0.277	-0.808	0.134833
ENSG00000070759	TESK2	testis-specific kinase 2 [Source:HGNC Symbol;Acc:11732]	0.153	0.798667	0.008	0.89
ENSG00000070761	C16orf80	chromosome 16 open reading frame 80 [Source:HGNC Symbol;Acc:29523]	0.643	0.313667	-0.238	0.744833
ENSG00000070770	CSNK2A2	casein kinase 2, alpha prime polypeptide [Source:HGNC Symbol;Acc:2459]	-0.869	0.111833	-0.246	0.755333
ENSG00000070778	PTPN21	protein tyrosine phosphatase, non-receptor type 21 [Source:HGNC Symbol;Acc:9651]	0.57	0.3895	0.898	0.0903333
ENSG00000070785	EIF2B3	eukaryotic translation initiation factor 2B, subunit 3 gamma, 58kDa [Source:HGNC Symbol;Acc:3259]	-0.687	0.262	-0.939	0.0568333
ENSG00000070808	CAMK2A	calcium/calmodulin-dependent protein kinase II alpha [Source:HGNC Symbol;Acc:1460]	-0.935	0.06	-0.1	0.667
ENSG00000070814	TCOF1	Treacher Collins-Franceschetti syndrome 1 [Source:HGNC Symbol;Acc:11654]	-0.572	0.378	-0.741	0.217
ENSG00000070831	CDC42	cell division cycle 42 (GTP binding protein, 25kDa) [Source:HGNC Symbol;Acc:1736]	-0.307	0.6225	-0.37	0.555833
ENSG00000070882	OSBPL3	oxysterol binding protein-like 3 [Source:HGNC Symbol;Acc:16370]	0.288	0.699333	0.226	0.782
ENSG00000070950	RAD18	RAD18 homolog (S. cerevisiae) [Source:HGNC Symbol;Acc:18278]	-0.384	0.595	-0.668	0.270667
ENSG00000070961	ATP2B1	ATPase, Ca++ transporting, plasma membrane 1 [Source:HGNC Symbol;Acc:814]	-0.715	0.241833	0.829	0.146833
ENSG00000071051	NCK2	NCK adaptor protein 2 [Source:HGNC Symbol;Acc:7665]	-0.635	0.336833	0.759	0.202167
ENSG00000071054	MAP4K4	mitogen-activated protein kinase kinase kinase kinase 4 [Source:HGNC Symbol;Acc:6866]	0.055	0.805167	-0.91	0.0816667
ENSG00000071073	MGAT4A	mannosyl (alpha-1,3-)-glycoprotein beta-1,4-N-acetylglucosaminyltransferase, isozyme A [Source:HGNC Symbol;Acc:7047]	0.712	0.258167	0.329	0.656833
ENSG00000071082	RPL31	ribosomal protein L31 [Source:HGNC Symbol;Acc:10334]	-0.564	0.376167	-0.626	0.319667
ENSG00000071127	WDR1	WD repeat domain 1 [Source:HGNC Symbol;Acc:12754]	-0.5	0.45	-0.969	0.0373333
ENSG00000071189	SNX13	sorting nexin 13 [Source:HGNC Symbol;Acc:21335]	0.195	0.5545	0.847	0.134833
ENSG00000071205	ARHGAP10	Rho GTPase activating protein 10 [Source:HGNC Symbol;Acc:26099]	0.042	0.979	-0.89	0.0956667
ENSG00000071242	RPS6KA2	ribosomal protein S6 kinase, 90kDa, polypeptide 2 [Source:HGNC Symbol;Acc:10431]	0.38	0.579833	0.781	0.176333
ENSG00000071243	ING3	inhibitor of growth family, member 3 [Source:HGNC Symbol;Acc:14587]	-0.615	0.323167	-0.567	0.383
ENSG00000071246	VASH1	vasohibin 1 [Source:HGNC Symbol;Acc:19964]	-0.095	0.737167	-0.833	0.138167
ENSG00000071282	LMCD1	LIM and cysteine-rich domains 1 [Source:HGNC Symbol;Acc:6633]	0.847	0.120667	0.3	0.683333
ENSG00000071462	WBSCR22	Williams Beuren syndrome chromosome region 22 [Source:HGNC Symbol;Acc:16405]	-0.033	0.725667	-0.107	0.819667
ENSG00000071537	SEL1L	sel-1 suppressor of lin-12-like (C. elegans) [Source:HGNC Symbol;Acc:10717]	0.188	0.803333	0.735	0.222167
ENSG00000071539	TRIP13	thyroid hormone receptor interactor 13 [Source:HGNC Symbol;Acc:12307]	-0.594	0.354	-0.812	0.149333
ENSG00000071553	ATP6AP1	ATPase, H+ transporting, lysosomal accessory protein 1 [Source:HGNC Symbol;Acc:868]	0.894	0.0831667	0.971	0.036
ENSG00000071564	TCF3	transcription factor 3 (E2A immunoglobulin enhancer binding factors E12/E47) [Source:HGNC Symbol;Acc:11633]	-0.609	0.3395	-0.952	0.0486667
ENSG00000071575	TRIB2	tribbles homolog 2 (Drosophila) [Source:HGNC Symbol;Acc:30809]	0.785	0.1685	0.006	0.799333
ENSG00000071626	DAZAP1	DAZ associated protein 1 [Source:HGNC Symbol;Acc:2683]	-0.72	0.232333	-0.919	0.0681667
ENSG00000071655	MBD3	methyl-CpG binding domain protein 3 [Source:HGNC Symbol;Acc:6918]	-0.172	0.652667	-0.797	0.170667
ENSG00000071794	HLTF	helicase-like transcription factor [Source:HGNC Symbol;Acc:11099]	0.046	0.977	-0.202	0.747333
ENSG00000071859	FAM50A	family with sequence similarity 50, member A [Source:HGNC Symbol;Acc:18786]	-0.337	0.619333	-0.743	0.212
ENSG00000071889	FAM3A	family with sequence similarity 3, member A [Source:HGNC Symbol;Acc:13749]	0.399	0.578333	0.032	0.891667
ENSG00000071894	CPSF1	cleavage and polyadenylation specific factor 1, 160kDa [Source:HGNC Symbol;Acc:2324]	-0.372	0.527	-0.868	0.110167
ENSG00000071909	MYO3B	myosin IIIB [Source:HGNC Symbol;Acc:15576]	-0.266	0.507167	0.46	0.443667
ENSG00000071967	CYBRD1	cytochrome b reductase 1 [Source:HGNC Symbol;Acc:20797]	0.641	0.302167	1	0.0166667
ENSG00000071994	PDCD2	programmed cell death 2 [Source:HGNC Symbol;Acc:8762]	-0.581	0.387167	-0.689	0.266
ENSG00000072041	SLC6A15	solute carrier family 6 (neutral amino acid transporter), member 15 [Source:HGNC Symbol;Acc:13621]	0.642	0.301	-0.659	0.281167
ENSG00000072042	RDH11	retinol dehydrogenase 11 (all-trans/9-cis/11-cis) [Source:HGNC Symbol;Acc:17964]	-0.259	0.7195	-0.668	0.286
ENSG00000072062	PRKACA	protein kinase, cAMP-dependent, catalytic, alpha [Source:HGNC Symbol;Acc:9380]	0.4	0.516667	-0.761	0.198
ENSG00000072071	LPHN1	latrophilin 1 [Source:HGNC Symbol;Acc:20973]	0.427	0.547	0.913	0.0708333
ENSG00000072080	SPP2	secreted phosphoprotein 2, 24kDa [Source:HGNC Symbol;Acc:11256]	0.196	0.583667	-0.256	0.609833
ENSG00000072110	ACTN1	actinin, alpha 1 [Source:HGNC Symbol;Acc:163]	0.158	0.788333	-0.825	0.151667
ENSG00000072121	ZFYVE26	zinc finger, FYVE domain containing 26 [Source:HGNC Symbol;Acc:20761]	0.551	0.421167	-0.142	0.694333
ENSG00000072133	RPS6KA6	ribosomal protein S6 kinase, 90kDa, polypeptide 6 [Source:HGNC Symbol;Acc:10435]	0.546	0.4085	-0.773	0.187333
ENSG00000072134	EPN2	epsin 2 [Source:HGNC Symbol;Acc:18639]	0.315	0.652333	-0.743	0.2165
ENSG00000072135	PTPN18	protein tyrosine phosphatase, non-receptor type 18 (brain-derived) [Source:HGNC Symbol;Acc:9649]	-0.932	0.0661667	-0.9	0.0833333
ENSG00000072163	LIMS2	LIM and senescent cell antigen-like domains 2 [Source:HGNC Symbol;Acc:16084]	0.454	0.494667	0.6	0.35
ENSG00000072195	SPEG	SPEG complex locus [Source:HGNC Symbol;Acc:16901]	0.08	0.830833	-0.819	0.152667
ENSG00000072201	LNX1	ligand of numb-protein X 1, E3 ubiquitin protein ligase [Source:HGNC Symbol;Acc:6657]	0.611	0.335833	-0.155	0.602167
ENSG00000072210	ALDH3A2	aldehyde dehydrogenase 3 family, member A2 [Source:HGNC Symbol;Acc:403]	0.6	0.35	0.798	0.159833
ENSG00000072274	TFRC	transferrin receptor (p90, CD71) [Source:HGNC Symbol;Acc:11763]	-0.425	0.538	-0.575	0.373333
ENSG00000072310	SREBF1	sterol regulatory element binding transcription factor 1 [Source:HGNC Symbol;Acc:11289]	-0.369	0.568333	0.014	0.993
ENSG00000072364	AFF4	AF4/FMR2 family, member 4 [Source:HGNC Symbol;Acc:17869]	0.527	0.4395	-0.871	0.112
ENSG00000072401	UBE2D1	ubiquitin-conjugating enzyme E2D 1 [Source:HGNC Symbol;Acc:12474]	0.194	0.7035	0.85	0.125167
ENSG00000072415	MPP5	membrane protein, palmitoylated 5 (MAGUK p55 subfamily member 5) [Source:HGNC Symbol;Acc:18669]	0.437	0.5075	-0.661	0.278833
ENSG00000072422	RHOBTB1	Rho-related BTB domain containing 1 [Source:HGNC Symbol;Acc:18738]	0.79	0.162833	0.546	0.413
ENSG00000072444	ASAH2C	N-acylsphingosine amidohydrolase (non-lysosomal ceramidase) 2C [Source:HGNC Symbol;Acc:23457]	-0.146	0.773	0.033	0.7545
ENSG00000072501	SMC1A	structural maintenance of chromosomes 1A [Source:HGNC Symbol;Acc:11111]	-0.4	0.575	-0.894	0.0928333
ENSG00000072506	HSD17B10	hydroxysteroid (17-beta) dehydrogenase 10 [Source:HGNC Symbol;Acc:4800]	-0.013	0.785	-0.774	0.191167
ENSG00000072518	MARK2	MAP/microtubule affinity-regulating kinase 2 [Source:HGNC Symbol;Acc:3332]	0.222	0.678667	-0.831	0.140333
ENSG00000072571	HMMR	hyaluronan-mediated motility receptor (RHAMM) [Source:HGNC Symbol;Acc:5012]	-0.586	0.362	-0.934	0.0606667
ENSG00000072609	CHFR	checkpoint with forkhead and ring finger domains, E3 ubiquitin protein ligase [Source:HGNC Symbol;Acc:20455]	0.637	0.320167	-0.306	0.652
ENSG00000072657	TRHDE	thyrotropin-releasing hormone degrading enzyme [Source:HGNC Symbol;Acc:30748]	0.598	0.329667	-0.832	0.134333
ENSG00000072682	P4HA2	prolyl 4-hydroxylase, alpha polypeptide II [Source:HGNC Symbol;Acc:8547]	0	1	0.308	0.671333
ENSG00000072736	NFATC3	nuclear factor of activated T-cells, cytoplasmic, calcineurin-dependent 3 [Source:HGNC Symbol;Acc:7777]	0.547	0.417167	-0.381	0.581667
ENSG00000072756	TRNT1	tRNA nucleotidyl transferase, CCA-adding, 1 [Source:HGNC Symbol;Acc:17341]	-0.833	0.139167	-0.278	0.668
ENSG00000072778	ACADVL	acyl-CoA dehydrogenase, very long chain [Source:HGNC Symbol;Acc:92]	0.185	0.829	-0.742	0.201833
ENSG00000072786	STK10	serine/threonine kinase 10 [Source:HGNC Symbol;Acc:11388]	0.196	0.790833	-0.916	0.0773333
ENSG00000072803	FBXW11	F-box and WD repeat domain containing 11 [Source:HGNC Symbol;Acc:13607]	0.272	0.721667	0.426	0.532833
ENSG00000072818	ACAP1	ArfGAP with coiled-coil, ankyrin repeat and PH domains 1 [Source:HGNC Symbol;Acc:16467]	-0.156	0.822333	0.495	0.4715
ENSG00000072832	CRMP1	collapsin response mediator protein 1 [Source:HGNC Symbol;Acc:2365]	-0.768	0.1875	0.247	0.745667
ENSG00000072840	EVC	Ellis van Creveld syndrome [Source:HGNC Symbol;Acc:3497]	0.512	0.471167	0.178	0.825167
ENSG00000072849	DERL2	derlin 2 [Source:HGNC Symbol;Acc:17943]	-0.171	0.751	0.113	0.758167
ENSG00000072858	SIDT1	SID1 transmembrane family, member 1 [Source:HGNC Symbol;Acc:25967]	-0.105	0.792	0.035	0.685167
ENSG00000072864	NDE1	nudE nuclear distribution E homolog 1 (A. nidulans) [Source:HGNC Symbol;Acc:17619]	-0.8	0.158833	-0.899	0.089
ENSG00000072952	MRVI1	murine retrovirus integration site 1 homolog [Source:HGNC Symbol;Acc:7237]	0.609	0.361	0.024	0.839667
ENSG00000072954	TMEM38A	transmembrane protein 38A [Source:HGNC Symbol;Acc:28462]	0.488	0.477667	0.23	0.744167
ENSG00000072958	AP1M1	adaptor-related protein complex 1, mu 1 subunit [Source:HGNC Symbol;Acc:13667]	0.33	0.625333	-0.972	0.0353333
ENSG00000073008	PVR	poliovirus receptor [Source:HGNC Symbol;Acc:9705]	-0.654	0.312	-0.825	0.145667
ENSG00000073009	IKBKG	inhibitor of kappa light polypeptide gene enhancer in B-cells, kinase gamma [Source:HGNC Symbol;Acc:5961]	-0.13	0.786667	-0.913	0.0786667
ENSG00000073050	XRCC1	X-ray repair complementing defective repair in Chinese hamster cells 1 [Source:HGNC Symbol;Acc:12828]	0.635	0.317	-0.786	0.1825
ENSG00000073060	SCARB1	scavenger receptor class B, member 1 [Source:HGNC Symbol;Acc:1664]	0.479	0.468333	-0.119	0.832333
ENSG00000073111	MCM2	minichromosome maintenance complex component 2 [Source:HGNC Symbol;Acc:6944]	-0.547	0.403	-0.722	0.2335
ENSG00000073146	MOV10L1	Mov10l1, Moloney leukemia virus 10-like 1, homolog (mouse) [Source:HGNC Symbol;Acc:7201]	-0.8	0.185333	0.544	0.402333
ENSG00000073150	PANX2	pannexin 2 [Source:HGNC Symbol;Acc:8600]	-0.24	0.750167	0.135	0.891667
ENSG00000073169	RP3-402G11.5	selenoprotein O [Source:RefSeq peptide;Acc:NP_113642]	-0.325	0.58	-0.849	0.1275
ENSG00000073331	ALPK1	alpha-kinase 1 [Source:HGNC Symbol;Acc:20917]	-0.449	0.5015	-0.186	0.718667
ENSG00000073350	LLGL2	lethal giant larvae homolog 2 (Drosophila) [Source:HGNC Symbol;Acc:6629]	0.624	0.316667	-0.316	0.623167
ENSG00000073417	PDE8A	phosphodiesterase 8A [Source:HGNC Symbol;Acc:8793]	-0.876	0.101833	-0.827	0.139
ENSG00000073464	CLCN4	chloride channel, voltage-sensitive 4 [Source:HGNC Symbol;Acc:2022]	-0.472	0.4905	0.115	0.925
ENSG00000073578	SDHA	succinate dehydrogenase complex, subunit A, flavoprotein (Fp) [Source:HGNC Symbol;Acc:10680]	0.296	0.6605	-0.96	0.0433333
ENSG00000073584	SMARCE1	SWI/SNF related, matrix associated, actin dependent regulator of chromatin, subfamily e, member 1 [Source:HGNC Symbol;Acc:11109]	-0.844	0.126167	-0.9	0.0833333
ENSG00000073598	FNDC8	fibronectin type III domain containing 8 [Source:HGNC Symbol;Acc:25286]	-0.546	0.410333	-0.883	0.1005
ENSG00000073605	GSDMB	gasdermin B [Source:HGNC Symbol;Acc:23690]	-0.281	0.709	0.441	0.485
ENSG00000073614	KDM5A	lysine (K)-specific demethylase 5A [Source:HGNC Symbol;Acc:9886]	-0.013	0.659167	-0.883	0.101167
ENSG00000073670	ADAM11	ADAM metallopeptidase domain 11 [Source:HGNC Symbol;Acc:189]	-0.42	0.552	0.288	0.5625
ENSG00000073711	PPP2R3A	protein phosphatase 2, regulatory subunit B'', alpha [Source:HGNC Symbol;Acc:9307]	-0.013	0.868333	-0.886	0.0985
ENSG00000073712	FERMT2	fermitin family member 2 [Source:HGNC Symbol;Acc:15767]	-0.414	0.566	-0.322	0.665833
ENSG00000073756	PTGS2	prostaglandin-endoperoxide synthase 2 (prostaglandin G/H synthase and cyclooxygenase) [Source:HGNC Symbol;Acc:9605]	0.2	0.816667	-0.7	0.233333
ENSG00000073792	IGF2BP2	insulin-like growth factor 2 mRNA binding protein 2 [Source:HGNC Symbol;Acc:28867]	-0.79	0.1685	-0.916	0.0773333
ENSG00000073803	MAP3K13	mitogen-activated protein kinase kinase kinase 13 [Source:HGNC Symbol;Acc:6852]	-1	0.0166667	-0.548	0.4
ENSG00000073849	ST6GAL1	ST6 beta-galactosamide alpha-2,6-sialyltranferase 1 [Source:HGNC Symbol;Acc:10860]	0.594	0.374167	-0.067	0.931667
ENSG00000073905	VDAC1P1	voltage-dependent anion channel 1 pseudogene 1 [Source:HGNC Symbol;Acc:12671]	-0.284	0.583333	-0.81	0.1605
ENSG00000073910	FRY	furry homolog (Drosophila) [Source:HGNC Symbol;Acc:20367]	0.577	0.399	0.795	0.155833
ENSG00000073921	PICALM	phosphatidylinositol binding clathrin assembly protein [Source:HGNC Symbol;Acc:15514]	0.3	0.683333	-0.71	0.241833
ENSG00000073969	NSF	N-ethylmaleimide-sensitive factor [Source:HGNC Symbol;Acc:8016]	0.118	0.889333	0.088	0.940833
ENSG00000074047	GLI2	GLI family zinc finger 2 [Source:HGNC Symbol;Acc:4318]	-0.481	0.4785	-0.534	0.413333
ENSG00000074054	CLASP1	cytoplasmic linker associated protein 1 [Source:HGNC Symbol;Acc:17088]	0.555	0.411833	-0.858	0.119833
ENSG00000074071	MRPS34	mitochondrial ribosomal protein S34 [Source:HGNC Symbol;Acc:16618]	-0.367	0.542	-0.794	0.176
ENSG00000074181	NOTCH3	notch 3 [Source:HGNC Symbol;Acc:7883]	0.629	0.312333	0.734	0.219167
ENSG00000074201	CLNS1A	chloride channel, nucleotide-sensitive, 1A [Source:HGNC Symbol;Acc:2080]	-0.675	0.29	-0.843	0.130167
ENSG00000074219	TEAD2	TEA domain family member 2 [Source:HGNC Symbol;Acc:11715]	-0.756	0.195333	-0.866	0.1075
ENSG00000074266	EED	embryonic ectoderm development [Source:HGNC Symbol;Acc:3188]	-0.387	0.548	-0.523	0.434833
ENSG00000074319	TSG101	tumor susceptibility gene 101 [Source:HGNC Symbol;Acc:15971]	0.286	0.614667	0.315	0.5955
ENSG00000074356	C17orf85	chromosome 17 open reading frame 85 [Source:HGNC Symbol;Acc:24612]	-0.777	0.186167	-0.969	0.0373333
ENSG00000074370	ATP2A3	ATPase, Ca++ transporting, ubiquitous [Source:HGNC Symbol;Acc:813]	-0.856	0.117	-0.395	0.556
ENSG00000074410	CA12	carbonic anhydrase XII [Source:HGNC Symbol;Acc:1371]	0.415	0.551167	-0.658	0.282333
ENSG00000074416	MGLL	monoglyceride lipase [Source:HGNC Symbol;Acc:17038]	0.046	0.92	-0.235	0.717
ENSG00000074527	NTN4	netrin 4 [Source:HGNC Symbol;Acc:13658]	-0.043	0.9785	1	0.0166667
ENSG00000074582	BCS1L	BCS1-like (S. cerevisiae) [Source:HGNC Symbol;Acc:1020]	-0.556	0.384167	-0.744	0.207
ENSG00000074590	NUAK1	NUAK family, SNF1-like kinase, 1 [Source:HGNC Symbol;Acc:14311]	0.723	0.249667	0.586	0.365333
ENSG00000074603	DPP8	dipeptidyl-peptidase 8 [Source:HGNC Symbol;Acc:16490]	0.586	0.373667	0.686	0.270667
ENSG00000074621	SLC24A1	solute carrier family 24 (sodium/potassium/calcium exchanger), member 1 [Source:HGNC Symbol;Acc:10975]	0.188	0.653833	0.434	0.399167
ENSG00000074657	ZNF532	zinc finger protein 532 [Source:HGNC Symbol;Acc:30940]	-0.334	0.650833	0.343	0.611667
ENSG00000074660	SCARF1	scavenger receptor class F, member 1 [Source:HGNC Symbol;Acc:16820]	-0.002	0.799667	0.555	0.396
ENSG00000074695	LMAN1	lectin, mannose-binding, 1 [Source:HGNC Symbol;Acc:6631]	-0.198	0.807833	-0.618	0.327667
ENSG00000074696	PTPLAD1	protein tyrosine phosphatase-like A domain containing 1 [Source:HGNC Symbol;Acc:24175]	-0.323	0.6165	0.129	0.828333
ENSG00000074755	ZZEF1	zinc finger, ZZ-type with EF-hand domain 1 [Source:HGNC Symbol;Acc:29027]	0.386	0.5615	-0.866	0.111833
ENSG00000074800	ENO1	enolase 1, (alpha) [Source:HGNC Symbol;Acc:3350]	-0.674	0.2695	-0.864	0.110333
ENSG00000074842	C19orf10	chromosome 19 open reading frame 10 [Source:HGNC Symbol;Acc:16948]	-0.064	0.9545	-0.448	0.4925
ENSG00000074855	ANO8	anoctamin 8 [Source:HGNC Symbol;Acc:29329]	-0.497	0.455833	-0.224	0.716667
ENSG00000074935	TUBE1	tubulin, epsilon 1 [Source:HGNC Symbol;Acc:20775]	-0.378	0.594667	0.626	0.320333
ENSG00000074964	ARHGEF10L	Rho guanine nucleotide exchange factor (GEF) 10-like [Source:HGNC Symbol;Acc:25540]	0.47	0.498	0.784	0.174667
ENSG00000074966	TXK	TXK tyrosine kinase [Source:HGNC Symbol;Acc:12434]	0.018	0.559	0.267	0.580333
ENSG00000075089	ACTR6	ARP6 actin-related protein 6 homolog (yeast) [Source:HGNC Symbol;Acc:24025]	0.142	0.604667	-0.006	0.811167
ENSG00000075131	TIPIN	TIMELESS interacting protein [Source:HGNC Symbol;Acc:30750]	-0.589	0.361	-0.735	0.208667
ENSG00000075142	SRI	sorcin [Source:HGNC Symbol;Acc:11292]	-0.303	0.603667	0.082	0.949
ENSG00000075151	EIF4G3	eukaryotic translation initiation factor 4 gamma, 3 [Source:HGNC Symbol;Acc:3298]	0.283	0.707333	0.523	0.429
ENSG00000075188	NUP37	nucleoporin 37kDa [Source:HGNC Symbol;Acc:29929]	-0.902	0.0823333	-0.751	0.207333
ENSG00000075213	SEMA3A	sema domain, immunoglobulin domain (Ig), short basic domain, secreted, (semaphorin) 3A [Source:HGNC Symbol;Acc:10723]	-0.882	0.0908333	0.608	0.334167
ENSG00000075218	GTSE1	G-2 and S-phase expressed 1 [Source:HGNC Symbol;Acc:13698]	-0.57	0.38	-0.9	0.0833333
ENSG00000075223	SEMA3C	sema domain, immunoglobulin domain (Ig), short basic domain, secreted, (semaphorin) 3C [Source:HGNC Symbol;Acc:10725]	-0.486	0.4735	0.982	0.0286667
ENSG00000075234	TTC38	tetratricopeptide repeat domain 38 [Source:HGNC Symbol;Acc:26082]	-0.711	0.238667	-0.941	0.056
ENSG00000075239	ACAT1	acetyl-CoA acetyltransferase 1 [Source:HGNC Symbol;Acc:93]	-0.539	0.397833	-0.786	0.1785
ENSG00000075240	GRAMD4	GRAM domain containing 4 [Source:HGNC Symbol;Acc:29113]	0.312	0.643333	0.924	0.0673333
ENSG00000075275	CELSR1	cadherin, EGF LAG seven-pass G-type receptor 1 (flamingo homolog, Drosophila) [Source:HGNC Symbol;Acc:1850]	0.728	0.232333	0.9	0.0833333
ENSG00000075292	ZNF638	zinc finger protein 638 [Source:HGNC Symbol;Acc:17894]	-0.597	0.360333	-0.584	0.363167
ENSG00000075303	SLC25A40	solute carrier family 25, member 40 [Source:HGNC Symbol;Acc:29680]	-0.927	0.0648333	-0.513	0.442667
ENSG00000075336	TIMM21	translocase of inner mitochondrial membrane 21 homolog (yeast) [Source:HGNC Symbol;Acc:25010]	0.107	0.535167	-0.426	0.5335
ENSG00000075391	RASAL2	RAS protein activator like 2 [Source:HGNC Symbol;Acc:9874]	0.39	0.5675	-0.78	0.186667
ENSG00000075399	C16orf7	chromosome 16 open reading frame 7 [Source:HGNC Symbol;Acc:13526]	0.023	0.6995	-0.028	0.703
ENSG00000075407	ZNF37A	zinc finger protein 37A [Source:HGNC Symbol;Acc:13102]	0.393	0.5415	-0.61	0.337833
ENSG00000075413	MARK3	MAP/microtubule affinity-regulating kinase 3 [Source:HGNC Symbol;Acc:6897]	-0.288	0.662333	-0.682	0.271
ENSG00000075415	SLC25A3	solute carrier family 25 (mitochondrial carrier; phosphate carrier), member 3 [Source:HGNC Symbol;Acc:10989]	-0.522	0.454167	-0.717	0.2375
ENSG00000075420	FNDC3B	fibronectin type III domain containing 3B [Source:HGNC Symbol;Acc:24670]	0.723	0.232833	0.895	0.0925
ENSG00000075426	FOSL2	FOS-like antigen 2 [Source:HGNC Symbol;Acc:3798]	-1	0.0166667	-0.554	0.396
ENSG00000075539	FRYL	FRY-like [Source:HGNC Symbol;Acc:29127]	-0.116	0.705833	-0.905	0.0843333
ENSG00000075568	TMEM131	transmembrane protein 131 [Source:HGNC Symbol;Acc:30366]	0.593	0.374	0.535	0.424667
ENSG00000075618	FSCN1	fascin homolog 1, actin-bundling protein (Strongylocentrotus purpuratus) [Source:HGNC Symbol;Acc:11148]	-0.485	0.475667	-0.9	0.0833333
ENSG00000075624	ACTB	actin, beta [Source:HGNC Symbol;Acc:132]	-0.607	0.338167	-0.881	0.101667
ENSG00000075643	MOCOS	molybdenum cofactor sulfurase [Source:HGNC Symbol;Acc:18234]	-0.625	0.304167	0.655	0.2805
ENSG00000075651	PLD1	phospholipase D1, phosphatidylcholine-specific [Source:HGNC Symbol;Acc:9067]	0.501	0.468	0.921	0.0693333
ENSG00000075702	WDR62	WD repeat domain 62 [Source:HGNC Symbol;Acc:24502]	-0.597	0.349	-0.922	0.07
ENSG00000075711	DLG1	discs, large homolog 1 (Drosophila) [Source:HGNC Symbol;Acc:2900]	-0.099	0.672667	0.798	0.17
ENSG00000075785	RAB7A	RAB7A, member RAS oncogene family [Source:HGNC Symbol;Acc:9788]	0.53	0.4305	0.874	0.111833
ENSG00000075790	BCAP29	B-cell receptor-associated protein 29 [Source:HGNC Symbol;Acc:24131]	0.374	0.607333	0.977	0.032
ENSG00000075826	SEC31B	SEC31 homolog B (S. cerevisiae) [Source:HGNC Symbol;Acc:23197]	0.376	0.609667	-0.216	0.798667
ENSG00000075856	SART3	squamous cell carcinoma antigen recognized by T cells 3 [Source:HGNC Symbol;Acc:16860]	-0.641	0.3105	-0.907	0.0851667
ENSG00000075884	ARHGAP15	Rho GTPase activating protein 15 [Source:HGNC Symbol;Acc:21030]	0.014	0.613833	0.036	0.671667
ENSG00000075886	TUBA3D	tubulin, alpha 3d [Source:HGNC Symbol;Acc:24071]	-0.14	0.587833	-0.746	0.206833
ENSG00000075914	EXOSC7	exosome component 7 [Source:HGNC Symbol;Acc:28112]	-0.692	0.2855	-0.146	0.780167
ENSG00000075945	KIFAP3	kinesin-associated protein 3 [Source:HGNC Symbol;Acc:17060]	0.643	0.287167	0.635	0.318333
ENSG00000075975	MKRN2	makorin ring finger protein 2 [Source:HGNC Symbol;Acc:7113]	-0.825	0.136667	-0.801	0.166333
ENSG00000076003	MCM6	minichromosome maintenance complex component 6 [Source:HGNC Symbol;Acc:6949]	-0.569	0.379	-0.816	0.152833
ENSG00000076043	REXO2	REX2, RNA exonuclease 2 homolog (S. cerevisiae) [Source:HGNC Symbol;Acc:17851]	0.527	0.4305	0.196	0.5805
ENSG00000076053	RBM7	RNA binding motif protein 7 [Source:HGNC Symbol;Acc:9904]	-0.543	0.424667	-0.173	0.7965
ENSG00000076067	RBMS2	RNA binding motif, single stranded interacting protein 2 [Source:HGNC Symbol;Acc:9909]	0.341	0.606833	-0.627	0.326333
ENSG00000076108	BAZ2A	bromodomain adjacent to zinc finger domain, 2A [Source:HGNC Symbol;Acc:962]	0.366	0.608833	-0.646	0.306833
ENSG00000076201	PTPN23	protein tyrosine phosphatase, non-receptor type 23 [Source:HGNC Symbol;Acc:14406]	-0.438	0.516667	-0.854	0.121
ENSG00000076242	MLH1	mutL homolog 1, colon cancer, nonpolyposis type 2 (E. coli) [Source:HGNC Symbol;Acc:7127]	-0.538	0.430833	-0.595	0.358833
ENSG00000076248	UNG	uracil-DNA glycosylase [Source:HGNC Symbol;Acc:12572]	0.251	0.741833	-0.28	0.6975
ENSG00000076258	FMO4	flavin containing monooxygenase 4 [Source:HGNC Symbol;Acc:3772]	-0.339	0.498667	1	0.0166667
ENSG00000076321	KLHL20	kelch-like 20 (Drosophila) [Source:HGNC Symbol;Acc:25056]	0.504	0.454333	0.798	0.168667
ENSG00000076344	RGS11	regulator of G-protein signaling 11 [Source:HGNC Symbol;Acc:9993]	0.333	0.646667	0.971	0.0356667
ENSG00000076351	SLC46A1	solute carrier family 46 (folate transporter), member 1 [Source:HGNC Symbol;Acc:30521]	-0.402	0.568167	0.412	0.554
ENSG00000076356	PLXNA2	plexin A2 [Source:HGNC Symbol;Acc:9100]	0.137	0.875833	0.08	0.753167
ENSG00000076382	SPAG5	sperm associated antigen 5 [Source:HGNC Symbol;Acc:13452]	-0.61	0.336	-0.9	0.0833333
ENSG00000076513	ANKRD13A	ankyrin repeat domain 13A [Source:HGNC Symbol;Acc:21268]	-0.594	0.352833	-0.834	0.142
ENSG00000076555	ACACB	acetyl-CoA carboxylase beta [Source:HGNC Symbol;Acc:85]	0.551	0.419833	0.368	0.5445
ENSG00000076604	TRAF4	TNF receptor-associated factor 4 [Source:HGNC Symbol;Acc:12034]	-0.582	0.390833	-0.674	0.268833
ENSG00000076641	PAG1	phosphoprotein associated with glycosphingolipid microdomains 1 [Source:HGNC Symbol;Acc:30043]	0.728	0.246333	-0.6	0.35
ENSG00000076650	GPATCH1	G patch domain containing 1 [Source:HGNC Symbol;Acc:24658]	0.315	0.628333	-0.701	0.251333
ENSG00000076662	ICAM3	intercellular adhesion molecule 3 [Source:HGNC Symbol;Acc:5346]	0.148	0.634333	-0.582	0.391833
ENSG00000076685	NT5C2	5'-nucleotidase, cytosolic II [Source:HGNC Symbol;Acc:8022]	0.498	0.463333	0.288	0.683333
ENSG00000076706	MCAM	melanoma cell adhesion molecule [Source:HGNC Symbol;Acc:6934]	0.773	0.1905	0.095	0.746667
ENSG00000076716	GPC4	glypican 4 [Source:HGNC Symbol;Acc:4452]	0.336	0.654667	0.828	0.137333
ENSG00000076770	MBNL3	muscleblind-like splicing regulator 3 [Source:HGNC Symbol;Acc:20564]	0.601	0.367	-0.539	0.414333
ENSG00000076864	RAP1GAP	RAP1 GTPase activating protein [Source:HGNC Symbol;Acc:9858]	0.052	0.739167	1	0.0166667
ENSG00000076924	XAB2	XPA binding protein 2 [Source:HGNC Symbol;Acc:14089]	-0.291	0.626833	-0.96	0.0433333
ENSG00000076928	ARHGEF1	Rho guanine nucleotide exchange factor (GEF) 1 [Source:HGNC Symbol;Acc:681]	-0.496	0.474167	-0.976	0.0326667
ENSG00000076944	STXBP2	syntaxin binding protein 2 [Source:HGNC Symbol;Acc:11445]	-0.671	0.267167	-0.625	0.3195
ENSG00000076984	MAP2K7	mitogen-activated protein kinase kinase 7 [Source:HGNC Symbol;Acc:6847]	0.307	0.652	-0.312	0.654
ENSG00000077044	DGKD	diacylglycerol kinase, delta 130kDa [Source:HGNC Symbol;Acc:2851]	-0.134	0.821833	-0.679	0.276667
ENSG00000077097	TOP2B	topoisomerase (DNA) II beta 180kDa [Source:HGNC Symbol;Acc:11990]	-0.619	0.3245	-0.855	0.119167
ENSG00000077147	TM9SF3	transmembrane 9 superfamily member 3 [Source:HGNC Symbol;Acc:21529]	0.696	0.2555	1	0.0166667
ENSG00000077150	NFKB2	nuclear factor of kappa light polypeptide gene enhancer in B-cells 2 (p49/p100) [Source:HGNC Symbol;Acc:7795]	-0.511	0.401667	-0.881	0.0928333
ENSG00000077152	UBE2T	ubiquitin-conjugating enzyme E2T (putative) [Source:HGNC Symbol;Acc:25009]	-0.633	0.3135	-0.715	0.228667
ENSG00000077157	PPP1R12B	protein phosphatase 1, regulatory subunit 12B [Source:HGNC Symbol;Acc:7619]	0.478	0.447333	0.002	0.915667
ENSG00000077232	DNAJC10	DnaJ (Hsp40) homolog, subfamily C, member 10 [Source:HGNC Symbol;Acc:24637]	-0.235	0.765	-0.188	0.7735
ENSG00000077235	GTF3C1	general transcription factor IIIC, polypeptide 1, alpha 220kDa [Source:HGNC Symbol;Acc:4664]	0.003	0.842	-0.881	0.102167
ENSG00000077238	IL4R	interleukin 4 receptor [Source:HGNC Symbol;Acc:6015]	0.217	0.661667	-0.829	0.1455
ENSG00000077254	USP33	ubiquitin specific peptidase 33 [Source:HGNC Symbol;Acc:20059]	-0.181	0.6575	-0.588	0.360833
ENSG00000077279	DCX	doublecortin [Source:HGNC Symbol;Acc:2714]	-0.173	0.69	0.37	0.5215
ENSG00000077312	SNRPA	small nuclear ribonucleoprotein polypeptide A [Source:HGNC Symbol;Acc:11151]	-0.815	0.153833	-0.806	0.153833
ENSG00000077348	EXOSC5	exosome component 5 [Source:HGNC Symbol;Acc:24662]	-0.771	0.198833	-0.736	0.197333
ENSG00000077380	DYNC1I2	dynein, cytoplasmic 1, intermediate chain 2 [Source:HGNC Symbol;Acc:2964]	0.189	0.7235	0.598	0.358833
ENSG00000077420	APBB1IP	amyloid beta (A4) precursor protein-binding, family B, member 1 interacting protein [Source:HGNC Symbol;Acc:17379]	-0.728	0.2325	0.068	0.856667
ENSG00000077454	LRCH4	leucine-rich repeats and calponin homology (CH) domain containing 4 [Source:HGNC Symbol;Acc:6691]	0.024	0.714	-0.678	0.267167
ENSG00000077458	FAM76B	family with sequence similarity 76, member B [Source:HGNC Symbol;Acc:28492]	-0.2	0.766833	-0.798	0.171333
ENSG00000077463	SIRT6	sirtuin 6 [Source:HGNC Symbol;Acc:14934]	-0.25	0.544833	-0.682	0.269333
ENSG00000077514	POLD3	polymerase (DNA-directed), delta 3, accessory subunit [Source:HGNC Symbol;Acc:20932]	-0.602	0.3445	-0.729	0.216167
ENSG00000077549	CAPZB	capping protein (actin filament) muscle Z-line, beta [Source:HGNC Symbol;Acc:1491]	0.212	0.734167	-0.873	0.109
ENSG00000077585	GPR137B	G protein-coupled receptor 137B [Source:HGNC Symbol;Acc:11862]	0.619	0.327833	0.829	0.150167
ENSG00000077616	NAALAD2	N-acetylated alpha-linked acidic dipeptidase 2 [Source:HGNC Symbol;Acc:14526]	-0.893	0.093	0.128	0.903333
ENSG00000077684	PHF17	PHD finger protein 17 [Source:HGNC Symbol;Acc:30027]	-0.632	0.312667	-1	0.0166667
ENSG00000077713	SLC25A43	solute carrier family 25, member 43 [Source:HGNC Symbol;Acc:30557]	-0.108	0.535	0.869	0.115667
ENSG00000077721	UBE2A	ubiquitin-conjugating enzyme E2A [Source:HGNC Symbol;Acc:12472]	0.661	0.303667	0.803	0.166833
ENSG00000077782	FGFR1	fibroblast growth factor receptor 1 [Source:HGNC Symbol;Acc:3688]	-0.759	0.181	-0.545	0.418667
ENSG00000077800	FKBP6	FK506 binding protein 6, 36kDa [Source:HGNC Symbol;Acc:3722]	0.189	0.685667	0.459	0.495667
ENSG00000077809	GTF2I	general transcription factor IIi [Source:HGNC Symbol;Acc:4659]	-0.646	0.309167	0.476	0.476667
ENSG00000077942	FBLN1	fibulin 1 [Source:HGNC Symbol;Acc:3600]	-0.752	0.204667	0.724	0.215333
ENSG00000077943	ITGA8	integrin, alpha 8 [Source:HGNC Symbol;Acc:6144]	0.782	0.175667	0.79	0.167833
ENSG00000078018	MAP2	microtubule-associated protein 2 [Source:HGNC Symbol;Acc:6839]	0.809	0.151667	0.1	0.95
ENSG00000078043	PIAS2	protein inhibitor of activated STAT, 2 [Source:HGNC Symbol;Acc:17311]	-0.725	0.223	0.766	0.196833
ENSG00000078053	AMPH	amphiphysin [Source:HGNC Symbol;Acc:471]	-0.969	0.0373333	-0.572	0.3775
ENSG00000078061	ARAF	v-raf murine sarcoma 3611 viral oncogene homolog [Source:HGNC Symbol;Acc:646]	0.189	0.613833	-0.78	0.184667
ENSG00000078070	MCCC1	methylcrotonoyl-CoA carboxylase 1 (alpha) [Source:HGNC Symbol;Acc:6936]	0.198	0.8005	-0.75	0.204833
ENSG00000078081	LAMP3	lysosomal-associated membrane protein 3 [Source:HGNC Symbol;Acc:14582]	-0.232	0.748833	0.177	0.660667
ENSG00000078098	FAP	fibroblast activation protein, alpha [Source:HGNC Symbol;Acc:3590]	-0.896	0.0893333	0.566	0.379833
ENSG00000078124	ACER3	alkaline ceramidase 3 [Source:HGNC Symbol;Acc:16066]	-0.939	0.061	0.642	0.318333
ENSG00000078140	UBE2K	ubiquitin-conjugating enzyme E2K [Source:HGNC Symbol;Acc:4914]	-0.355	0.563167	-0.142	0.755667
ENSG00000078142	PIK3C3	phosphatidylinositol 3-kinase, catalytic subunit type 3 [Source:HGNC Symbol;Acc:8974]	0.428	0.538833	-0.549	0.401
ENSG00000078177	N4BP2	NEDD4 binding protein 2 [Source:HGNC Symbol;Acc:29851]	-0.402	0.579667	-0.1	0.9185
ENSG00000078237	C12orf5	chromosome 12 open reading frame 5 [Source:HGNC Symbol;Acc:1185]	0.651	0.300667	0.282	0.6875
ENSG00000078246	TULP3	tubby like protein 3 [Source:HGNC Symbol;Acc:12425]	-0.611	0.345333	-0.839	0.134667
ENSG00000078269	SYNJ2	synaptojanin 2 [Source:HGNC Symbol;Acc:11504]	-0.458	0.492667	-0.767	0.188333
ENSG00000078295	ADCY2	adenylate cyclase 2 (brain) [Source:HGNC Symbol;Acc:233]	-0.335	0.517833	0.401	0.512333
ENSG00000078304	PPP2R5C	protein phosphatase 2, regulatory subunit B', gamma [Source:HGNC Symbol;Acc:9311]	-0.237	0.634167	0.716	0.232833
ENSG00000078319	PMS2P1	postmeiotic segregation increased 2 pseudogene 1 [Source:HGNC Symbol;Acc:9123]	0.18	0.5765	-0.302	0.591667
ENSG00000078369	GNB1	guanine nucleotide binding protein (G protein), beta polypeptide 1 [Source:HGNC Symbol;Acc:4396]	0.304	0.654	-0.709	0.248167
ENSG00000078401	EDN1	endothelin 1 [Source:HGNC Symbol;Acc:3176]	-0.016	0.742667	0.2	0.783333
ENSG00000078403	MLLT10	myeloid/lymphoid or mixed-lineage leukemia (trithorax homolog, Drosophila); translocated to, 10 [Source:HGNC Symbol;Acc:16063]	-0.734	0.219167	-0.49	0.482333
ENSG00000078487	ZCWPW1	zinc finger, CW type with PWWP domain 1 [Source:HGNC Symbol;Acc:23486]	0.68	0.256667	0.973	0.0346667
ENSG00000078618	NRD1	nardilysin (N-arginine dibasic convertase) [Source:HGNC Symbol;Acc:7995]	-0.072	0.790667	-0.826	0.150333
ENSG00000078668	VDAC3	voltage-dependent anion channel 3 [Source:HGNC Symbol;Acc:12674]	-0.711	0.254167	-0.377	0.5655
ENSG00000078674	PCM1	pericentriolar material 1 [Source:HGNC Symbol;Acc:8727]	0.172	0.578667	-0.541	0.4135
ENSG00000078687	TNRC6C	trinucleotide repeat containing 6C [Source:HGNC Symbol;Acc:29318]	0.232	0.647167	-0.79	0.174
ENSG00000078699	CBFA2T2	core-binding factor, runt domain, alpha subunit 2; translocated to, 2 [Source:HGNC Symbol;Acc:1536]	0.479	0.490333	0.691	0.26
ENSG00000078747	ITCH	itchy E3 ubiquitin protein ligase [Source:HGNC Symbol;Acc:13890]	-0.03	0.628833	-0.645	0.309667
ENSG00000078795	PKD2L2	polycystic kidney disease 2-like 2 [Source:HGNC Symbol;Acc:9012]	-0.342	0.4825	-0.56	0.3735
ENSG00000078804	TP53INP2	tumor protein p53 inducible nuclear protein 2 [Source:HGNC Symbol;Acc:16104]	0.087	0.908167	0.857	0.1175
ENSG00000078808	SDF4	stromal cell derived factor 4 [Source:HGNC Symbol;Acc:24188]	0.913	0.0718333	0.628	0.327167
ENSG00000078814	MYH7B	myosin, heavy chain 7B, cardiac muscle, beta [Source:HGNC Symbol;Acc:15906]	0.543	0.428333	-0.664	0.2875
ENSG00000078902	TOLLIP	toll interacting protein [Source:HGNC Symbol;Acc:16476]	0.617	0.332167	0.864	0.110333
ENSG00000078967	UBE2D4	ubiquitin-conjugating enzyme E2D 4 (putative) [Source:HGNC Symbol;Acc:21647]	0.225	0.750333	0.896	0.0813333
ENSG00000079101	CLUL1	clusterin-like 1 (retinal) [Source:HGNC Symbol;Acc:2096]	0.545	0.4175	0.523	0.4005
ENSG00000079102	RUNX1T1	runt-related transcription factor 1; translocated to, 1 (cyclin D-related) [Source:HGNC Symbol;Acc:1535]	-0.495	0.465333	0.386	0.585
ENSG00000079112	CDH17	cadherin 17, LI cadherin (liver-intestine) [Source:HGNC Symbol;Acc:1756]	-0.154	0.599833	0.207	0.495167
ENSG00000079134	THOC1	THO complex 1 [Source:HGNC Symbol;Acc:19070]	-0.905	0.0771667	-0.302	0.687833
ENSG00000079150	FKBP7	FK506 binding protein 7 [Source:HGNC Symbol;Acc:3723]	-0.125	0.899167	0.123	0.817667
ENSG00000079156	OSBPL6	oxysterol binding protein-like 6 [Source:HGNC Symbol;Acc:16388]	-0.488	0.471833	0.321	0.509333
ENSG00000079246	XRCC5	X-ray repair complementing defective repair in Chinese hamster cells 5 (double-strand-break rejoining) [Source:HGNC Symbol;Acc:12833]	-0.57	0.38	-0.91	0.0785
ENSG00000079257	LXN	latexin [Source:HGNC Symbol;Acc:13347]	0.367	0.620833	-0.9	0.0833333
ENSG00000079263	SP140	SP140 nuclear body protein [Source:HGNC Symbol;Acc:17133]	0.27	0.720333	0.27	0.5185
ENSG00000079277	MKNK1	MAP kinase interacting serine/threonine kinase 1 [Source:HGNC Symbol;Acc:7110]	0.818	0.1585	-0.048	0.803
ENSG00000079308	TNS1	tensin 1 [Source:HGNC Symbol;Acc:11973]	-0.619	0.324667	-0.828	0.150333
ENSG00000079313	REXO1	REX1, RNA exonuclease 1 homolog (S. cerevisiae) [Source:HGNC Symbol;Acc:24616]	0.024	0.714333	-0.698	0.248167
ENSG00000079332	SAR1A	SAR1 homolog A (S. cerevisiae) [Source:HGNC Symbol;Acc:10534]	-0.523	0.443667	0.906	0.0838333
ENSG00000079335	CDC14A	CDC14 cell division cycle 14 homolog A (S. cerevisiae) [Source:HGNC Symbol;Acc:1718]	0.74	0.2235	-0.074	0.665667
ENSG00000079337	RAPGEF3	Rap guanine nucleotide exchange factor (GEF) 3 [Source:HGNC Symbol;Acc:16629]	-0.567	0.385833	0.895	0.0886667
ENSG00000079385	CEACAM1	carcinoembryonic antigen-related cell adhesion molecule 1 (biliary glycoprotein) [Source:HGNC Symbol;Acc:1814]	0.391	0.5945	-0.101	0.6415
ENSG00000079387	SENP1	SUMO1/sentrin specific peptidase 1 [Source:HGNC Symbol;Acc:17927]	-0.442	0.5295	-0.607	0.364167
ENSG00000079432	CIC	capicua homolog (Drosophila) [Source:HGNC Symbol;Acc:14214]	0.065	0.599667	-0.586	0.357667
ENSG00000079435	LIPE	lipase, hormone-sensitive [Source:HGNC Symbol;Acc:6621]	-0.078	0.595833	-0.869	0.115667
ENSG00000079459	FDFT1	farnesyl-diphosphate farnesyltransferase 1 [Source:HGNC Symbol;Acc:3629]	-0.185	0.829	-0.271	0.687667
ENSG00000079462	PAFAH1B3	platelet-activating factor acetylhydrolase 1b, catalytic subunit 3 (29kDa) [Source:HGNC Symbol;Acc:8576]	-0.581	0.384833	-0.933	0.0613333
ENSG00000079482	OPHN1	oligophrenin 1 [Source:HGNC Symbol;Acc:8148]	-0.112	0.551667	0.048	0.800333
ENSG00000079616	KIF22	kinesin family member 22 [Source:HGNC Symbol;Acc:6391]	-0.562	0.386333	-0.897	0.087
ENSG00000079691	LRRC16A	leucine rich repeat containing 16A [Source:HGNC Symbol;Acc:21581]	-0.266	0.7295	-0.395	0.490833
ENSG00000079739	PGM1	phosphoglucomutase 1 [Source:HGNC Symbol;Acc:8905]	-0.362	0.58	0.789	0.182
ENSG00000079785	DDX1	DEAD (Asp-Glu-Ala-Asp) box helicase 1 [Source:HGNC Symbol;Acc:2734]	-0.825	0.149667	-0.964	0.0403333
ENSG00000079805	DNM2	dynamin 2 [Source:HGNC Symbol;Acc:2974]	0.244	0.7345	-0.892	0.0946667
ENSG00000079819	EPB41L2	erythrocyte membrane protein band 4.1-like 2 [Source:HGNC Symbol;Acc:3379]	-0.338	0.644667	-0.281	0.705667
ENSG00000079841	RIMS1	regulating synaptic membrane exocytosis 1 [Source:HGNC Symbol;Acc:17282]	0.431	0.554833	0.509	0.4715
ENSG00000079931	MOXD1	monooxygenase, DBH-like 1 [Source:HGNC Symbol;Acc:21063]	0.6	0.35	0.987	0.0253333
ENSG00000079950	STX7	syntaxin 7 [Source:HGNC Symbol;Acc:11442]	0.314	0.679833	0.978	0.0308333
ENSG00000079974	RABL2B	RAB, member of RAS oncogene family-like 2B [Source:HGNC Symbol;Acc:9800]	0.482	0.4655	0.094	0.7215
ENSG00000079999	KEAP1	kelch-like ECH-associated protein 1 [Source:HGNC Symbol;Acc:23177]	0.564	0.357667	-0.429	0.5295
ENSG00000080031	PTPRH	protein tyrosine phosphatase, receptor type, H [Source:HGNC Symbol;Acc:9672]	-0.763	0.1935	-0.021	0.869
ENSG00000080189	SLC35C2	solute carrier family 35, member C2 [Source:HGNC Symbol;Acc:17117]	-0.494	0.443833	-0.188	0.816833
ENSG00000080200	CRYBG3	beta-gamma crystallin domain containing 3 [Source:HGNC Symbol;Acc:34427]	0.365	0.517667	0.072	0.825333
ENSG00000080298	RFX3	regulatory factor X, 3 (influences HLA class II expression) [Source:HGNC Symbol;Acc:9984]	-0.797	0.166	0.488	0.472667
ENSG00000080345	RIF1	RAP1 interacting factor homolog (yeast) [Source:HGNC Symbol;Acc:23207]	-0.663	0.291667	-0.906	0.0836667
ENSG00000080371	RAB21	RAB21, member RAS oncogene family [Source:HGNC Symbol;Acc:18263]	0.486	0.483	0.943	0.0546667
ENSG00000080493	SLC4A4	solute carrier family 4, sodium bicarbonate cotransporter, member 4 [Source:HGNC Symbol;Acc:11030]	0.236	0.766667	-0.466	0.508833
ENSG00000080503	SMARCA2	SWI/SNF related, matrix associated, actin dependent regulator of chromatin, subfamily a, member 2 [Source:HGNC Symbol;Acc:11098]	0.254	0.700333	0.307	0.674833
ENSG00000080546	SESN1	sestrin 1 [Source:HGNC Symbol;Acc:21595]	0.7	0.233333	0.338	0.639
ENSG00000080561	MID2	midline 2 [Source:HGNC Symbol;Acc:7096]	-0.89	0.0966667	-0.483	0.429667
ENSG00000080573	COL5A3	collagen, type V, alpha 3 [Source:HGNC Symbol;Acc:14864]	-0.632	0.312667	-0.1	0.95
ENSG00000080603	SRCAP	Snf2-related CREBBP activator protein [Source:HGNC Symbol;Acc:16974]	0.007	0.698833	-0.746	0.214667
ENSG00000080608	KIAA0020	KIAA0020 [Source:HGNC Symbol;Acc:29676]	-0.711	0.233833	-1	0.0166667
ENSG00000080709	KCNN2	potassium intermediate/small conductance calcium-activated channel, subfamily N, member 2 [Source:HGNC Symbol;Acc:6291]	-0.429	0.525333	0.9	0.0833333
ENSG00000080802	CNOT4	CCR4-NOT transcription complex, subunit 4 [Source:HGNC Symbol;Acc:7880]	0.665	0.313333	0.24	0.761667
ENSG00000080815	PSEN1	presenilin 1 [Source:HGNC Symbol;Acc:9508]	0.495	0.4725	0.346	0.606667
ENSG00000080819	CPOX	coproporphyrinogen oxidase [Source:HGNC Symbol;Acc:2321]	-0.175	0.521667	-0.628	0.334167
ENSG00000080822	CLDND1	claudin domain containing 1 [Source:HGNC Symbol;Acc:1322]	-0.311	0.642333	0.801	0.1675
ENSG00000080823	MOK	MOK protein kinase [Source:HGNC Symbol;Acc:9833]	0.39	0.583333	-0.93	0.065
ENSG00000080824	HSP90AA1	heat shock protein 90kDa alpha (cytosolic), class A member 1 [Source:HGNC Symbol;Acc:5253]	0.303	0.664333	-0.68	0.256667
ENSG00000080839	RBL1	retinoblastoma-like 1 (p107) [Source:HGNC Symbol;Acc:9893]	-0.58	0.367333	-0.615	0.3325
ENSG00000080845	DLGAP4	discs, large (Drosophila) homolog-associated protein 4 [Source:HGNC Symbol;Acc:24476]	0.432	0.504667	-0.77	0.196167
ENSG00000080947	CROCCP3	ciliary rootlet coiled-coil, rootletin pseudogene 3 [Source:HGNC Symbol;Acc:29405]	0.552	0.416667	-0.017	0.692833
ENSG00000080986	NDC80	NDC80 kinetochore complex component homolog (S. cerevisiae) [Source:HGNC Symbol;Acc:16909]	-0.577	0.372167	-0.936	0.0593333
ENSG00000081014	AP4E1	adaptor-related protein complex 4, epsilon 1 subunit [Source:HGNC Symbol;Acc:573]	0.643	0.329	0.02	0.572167
ENSG00000081019	RSBN1	round spermatid basic protein 1 [Source:HGNC Symbol;Acc:25642]	0.581	0.3775	0.864	0.111667
ENSG00000081026	MAGI3	membrane associated guanylate kinase, WW and PDZ domain containing 3 [Source:HGNC Symbol;Acc:29647]	-0.642	0.305333	-0.534	0.417667
ENSG00000081041	CXCL2	chemokine (C-X-C motif) ligand 2 [Source:HGNC Symbol;Acc:4603]	-0.381	0.5875	-0.686	0.249667
ENSG00000081051	AFP	alpha-fetoprotein [Source:HGNC Symbol;Acc:317]	0.103	0.738833	0.187	0.566833
ENSG00000081052	COL4A4	collagen, type IV, alpha 4 [Source:HGNC Symbol;Acc:2206]	0.632	0.332167	0.967	0.0386667
ENSG00000081059	TCF7	transcription factor 7 (T-cell specific, HMG-box) [Source:HGNC Symbol;Acc:11639]	-0.505	0.444167	-0.762	0.194167
ENSG00000081087	OSTM1	osteopetrosis associated transmembrane protein 1 [Source:HGNC Symbol;Acc:21652]	0.65	0.291667	0.966	0.0393333
ENSG00000081148	IMPG2	interphotoreceptor matrix proteoglycan 2 [Source:HGNC Symbol;Acc:18362]	-0.094	0.588333	0.016	0.6095
ENSG00000081154	PCNP	PEST proteolytic signal containing nuclear protein [Source:HGNC Symbol;Acc:30023]	0.17	0.630333	0.526	0.433167
ENSG00000081177	EXD2	exonuclease 3'-5' domain containing 2 [Source:HGNC Symbol;Acc:20217]	0.428	0.54	0.679	0.275667
ENSG00000081181	ARG2	arginase, type II [Source:HGNC Symbol;Acc:664]	-0.748	0.206	-0.7	0.233333
ENSG00000081189	MEF2C	myocyte enhancer factor 2C [Source:HGNC Symbol;Acc:6996]	0.307	0.665	-0.173	0.7875
ENSG00000081307	UBA5	ubiquitin-like modifier activating enzyme 5 [Source:HGNC Symbol;Acc:23230]	0.594	0.378167	0.1	0.95
ENSG00000081320	STK17B	serine/threonine kinase 17b [Source:HGNC Symbol;Acc:11396]	0.096	0.943667	-0.2	0.825
ENSG00000081377	CDC14B	CDC14 cell division cycle 14 homolog B (S. cerevisiae) [Source:HGNC Symbol;Acc:1719]	-0.243	0.744833	0.863	0.112833
ENSG00000081386	ZNF510	zinc finger protein 510 [Source:HGNC Symbol;Acc:29161]	0.511	0.472167	0.3	0.691333
ENSG00000081665	ZNF506	zinc finger protein 506 [Source:HGNC Symbol;Acc:23780]	-0.105	0.912667	0.584	0.379833
ENSG00000081692	JMJD4	jumonji domain containing 4 [Source:HGNC Symbol;Acc:25724]	-0.172	0.592167	-0.621	0.3255
ENSG00000081721	DUSP12	dual specificity phosphatase 12 [Source:HGNC Symbol;Acc:3067]	-0.189	0.820333	-0.532	0.421667
ENSG00000081760	AACS	acetoacetyl-CoA synthetase [Source:HGNC Symbol;Acc:21298]	-0.163	0.845	-0.965	0.04
ENSG00000081791	KIAA0141	KIAA0141 [Source:HGNC Symbol;Acc:28969]	-0.512	0.431333	-0.764	0.176333
ENSG00000081803	CADPS2	Ca++-dependent secretion activator 2 [Source:HGNC Symbol;Acc:16018]	0.72	0.22	-0.478	0.488333
ENSG00000081853	PCDHGA2	protocadherin gamma subfamily A, 2 [Source:HGNC Symbol;Acc:8700]	0.533	0.4405	0.83	0.146667
ENSG00000081870	HSPB11	heat shock protein family B (small), member 11 [Source:HGNC Symbol;Acc:25019]	-0.365	0.618333	-0.331	0.6545
ENSG00000081913	PHLPP1	PH domain and leucine rich repeat protein phosphatase 1 [Source:HGNC Symbol;Acc:20610]	-0.288	0.534	-0.803	0.159
ENSG00000081923	ATP8B1	ATPase, aminophospholipid transporter, class I, type 8B, member 1 [Source:HGNC Symbol;Acc:3706]	-0.186	0.7985	-0.648	0.292667
ENSG00000082014	SMARCD3	SWI/SNF related, matrix associated, actin dependent regulator of chromatin, subfamily d, member 3 [Source:HGNC Symbol;Acc:11108]	-0.381	0.602	0.164	0.843333
ENSG00000082068	WDR70	WD repeat domain 70 [Source:HGNC Symbol;Acc:25495]	-0.939	0.0561667	-0.84	0.1305
ENSG00000082126	MPP4	membrane protein, palmitoylated 4 (MAGUK p55 subfamily member 4) [Source:HGNC Symbol;Acc:13680]	-0.558	0.3955	-0.35	0.6
ENSG00000082146	STRADB	STE20-related kinase adaptor beta [Source:HGNC Symbol;Acc:13205]	-0.692	0.251833	0.68	0.259667
ENSG00000082153	BZW1	basic leucine zipper and W2 domains 1 [Source:HGNC Symbol;Acc:18380]	-0.727	0.221333	-0.849	0.119333
ENSG00000082196	C1QTNF3	C1q and tumor necrosis factor related protein 3 [Source:HGNC Symbol;Acc:14326]	0.122	0.6195	0.504	0.4405
ENSG00000082212	ME2	malic enzyme 2, NAD(+)-dependent, mitochondrial [Source:HGNC Symbol;Acc:6984]	-0.779	0.174833	-0.833	0.139167
ENSG00000082213	C5orf22	chromosome 5 open reading frame 22 [Source:HGNC Symbol;Acc:25639]	-0.03	0.795333	0.255	0.683833
ENSG00000082258	CCNT2	cyclin T2 [Source:HGNC Symbol;Acc:1600]	-0.493	0.462833	-0.641	0.306833
ENSG00000082269	FAM135A	family with sequence similarity 135, member A [Source:HGNC Symbol;Acc:21084]	0.627	0.328	0.826	0.151
ENSG00000082397	EPB41L3	erythrocyte membrane protein band 4.1-like 3 [Source:HGNC Symbol;Acc:3380]	-0.9	0.0833333	0.759	0.190333
ENSG00000082438	COBLL1	COBL-like 1 [Source:HGNC Symbol;Acc:23571]	0.618	0.357167	0.941	0.056
ENSG00000082458	DLG3	discs, large homolog 3 (Drosophila) [Source:HGNC Symbol;Acc:2902]	-0.768	0.194	0.645	0.304333
ENSG00000082482	KCNK2	potassium channel, subfamily K, member 2 [Source:HGNC Symbol;Acc:6277]	-0.706	0.241	-0.819	0.151167
ENSG00000082497	SERTAD4	SERTA domain containing 4 [Source:HGNC Symbol;Acc:25236]	0.98	0.03	0.487	0.466833
ENSG00000082512	TRAF5	TNF receptor-associated factor 5 [Source:HGNC Symbol;Acc:12035]	-0.326	0.662	-0.414	0.526333
ENSG00000082515	MRPL22	mitochondrial ribosomal protein L22 [Source:HGNC Symbol;Acc:14480]	-0.614	0.363833	-0.615	0.350167
ENSG00000082516	GEMIN5	gem (nuclear organelle) associated protein 5 [Source:HGNC Symbol;Acc:20043]	-0.396	0.58	-0.697	0.249333
ENSG00000082641	NFE2L1	nuclear factor (erythroid-derived 2)-like 1 [Source:HGNC Symbol;Acc:7781]	0.816	0.152333	0.856	0.124167
ENSG00000082701	GSK3B	glycogen synthase kinase 3 beta [Source:HGNC Symbol;Acc:4617]	0.69	0.291167	0.865	0.114167
ENSG00000082781	ITGB5	integrin, beta 5 [Source:HGNC Symbol;Acc:6160]	0.658	0.2815	0.859	0.107333
ENSG00000082805	ERC1	ELKS/RAB6-interacting/CAST family member 1 [Source:HGNC Symbol;Acc:17072]	0.455	0.526667	-0.734	0.226333
ENSG00000082898	XPO1	exportin 1 (CRM1 homolog, yeast) [Source:HGNC Symbol;Acc:12825]	-0.865	0.0996667	-0.786	0.172833
ENSG00000082996	RNF13	ring finger protein 13 [Source:HGNC Symbol;Acc:10057]	0.585	0.365	0.851	0.128333
ENSG00000083067	TRPM3	transient receptor potential cation channel, subfamily M, member 3 [Source:HGNC Symbol;Acc:17992]	0.299	0.615667	-0.121	0.670667
ENSG00000083093	PALB2	partner and localizer of BRCA2 [Source:HGNC Symbol;Acc:26144]	0.509	0.468333	-0.624	0.319833
ENSG00000083097	DOPEY1	dopey family member 1 [Source:HGNC Symbol;Acc:21194]	0.469	0.4875	0.096	0.777
ENSG00000083099	LYRM2	LYR motif containing 2 [Source:HGNC Symbol;Acc:25229]	-0.289	0.6935	-0.661	0.282667
ENSG00000083123	BCKDHB	branched chain keto acid dehydrogenase E1, beta polypeptide [Source:HGNC Symbol;Acc:987]	-0.58	0.365167	-0.902	0.09
ENSG00000083168	KAT6A	K(lysine) acetyltransferase 6A [Source:HGNC Symbol;Acc:13013]	0.166	0.679833	-0.871	0.112167
ENSG00000083223	ZCCHC6	zinc finger, CCHC domain containing 6 [Source:HGNC Symbol;Acc:25817]	0.392	0.585833	0.124	0.808667
ENSG00000083290	ULK2	unc-51-like kinase 2 (C. elegans) [Source:HGNC Symbol;Acc:13480]	0.575	0.3645	0.457	0.482333
ENSG00000083307	GRHL2	grainyhead-like 2 (Drosophila) [Source:HGNC Symbol;Acc:2799]	-0.379	0.491333	0.298	0.622667
ENSG00000083312	TNPO1	transportin 1 [Source:HGNC Symbol;Acc:6401]	0.684	0.278333	0.774	0.190167
ENSG00000083444	PLOD1	procollagen-lysine, 2-oxoglutarate 5-dioxygenase 1 [Source:HGNC Symbol;Acc:9081]	0.633	0.313333	0.01	0.866667
ENSG00000083454	P2RX5	purinergic receptor P2X, ligand-gated ion channel, 5 [Source:HGNC Symbol;Acc:8536]	0.514	0.462333	0.383	0.560167
ENSG00000083457	ITGAE	integrin, alpha E (antigen CD103, human mucosal lymphocyte antigen 1; alpha polypeptide) [Source:HGNC Symbol;Acc:6147]	-0.062	0.569833	0.807	0.154167
ENSG00000083520	DIS3	DIS3 mitotic control homolog (S. cerevisiae) [Source:HGNC Symbol;Acc:20604]	-0.514	0.4085	-0.852	0.127833
ENSG00000083535	PIBF1	progesterone immunomodulatory binding factor 1 [Source:HGNC Symbol;Acc:23352]	-0.397	0.540167	-0.544	0.43
ENSG00000083544	TDRD3	tudor domain containing 3 [Source:HGNC Symbol;Acc:20612]	-0.487	0.471	-0.122	0.904
ENSG00000083635	NUFIP1	nuclear fragile X mental retardation protein interacting protein 1 [Source:HGNC Symbol;Acc:8057]	-0.308	0.676167	-0.614	0.322167
ENSG00000083642	PDS5B	PDS5, regulator of cohesion maintenance, homolog B (S. cerevisiae) [Source:HGNC Symbol;Acc:20418]	-0.316	0.547167	-0.567	0.386667
ENSG00000083720	OXCT1	3-oxoacid CoA transferase 1 [Source:HGNC Symbol;Acc:8527]	-0.262	0.649833	-0.689	0.246167
ENSG00000083750	RRAGB	Ras-related GTP binding B [Source:HGNC Symbol;Acc:19901]	0.556	0.3925	0.56	0.38
ENSG00000083799	CYLD	cylindromatosis (turban tumor syndrome) [Source:HGNC Symbol;Acc:2584]	0.424	0.552	0.038	0.873333
ENSG00000083807	SLC27A5	solute carrier family 27 (fatty acid transporter), member 5 [Source:HGNC Symbol;Acc:10999]	-0.638	0.339667	-0.752	0.189333
ENSG00000083812	ZNF324	zinc finger protein 324 [Source:HGNC Symbol;Acc:14096]	0.848	0.1315	-0.654	0.286333
ENSG00000083814	ZNF671	zinc finger protein 671 [Source:HGNC Symbol;Acc:26279]	0.905	0.0811667	0.131	0.898333
ENSG00000083817	ZNF416	zinc finger protein 416 [Source:HGNC Symbol;Acc:20645]	0.867	0.105667	0.529	0.429333
ENSG00000083828	ZNF586	zinc finger protein 586 [Source:HGNC Symbol;Acc:25949]	-0.7	0.258	-0.884	0.101667
ENSG00000083838	ZNF446	zinc finger protein 446 [Source:HGNC Symbol;Acc:21036]	0.438	0.529667	-0.284	0.613667
ENSG00000083842	ZNF8	zinc finger protein 8 [Source:HGNC Symbol;Acc:13154]	0.335	0.538833	-0.628	0.322833
ENSG00000083844	ZNF264	zinc finger protein 264 [Source:HGNC Symbol;Acc:13057]	0.649	0.310333	0.514	0.455833
ENSG00000083845	RPS5	ribosomal protein S5 [Source:HGNC Symbol;Acc:10426]	-0.625	0.346333	-0.871	0.109833
ENSG00000083857	FAT1	FAT tumor suppressor homolog 1 (Drosophila) [Source:HGNC Symbol;Acc:3595]	0.487	0.4795	0.877	0.1055
ENSG00000083896	YTHDC1	YTH domain containing 1 [Source:HGNC Symbol;Acc:30626]	0.168	0.680333	-0.466	0.454333
ENSG00000083937	CHMP2B	charged multivesicular body protein 2B [Source:HGNC Symbol;Acc:24537]	0.024	0.747	0.887	0.0973333
ENSG00000084070	SMAP2	small ArfGAP2 [Source:HGNC Symbol;Acc:25082]	-0.552	0.398	-0.399	0.556667
ENSG00000084072	PPIE	peptidylprolyl isomerase E (cyclophilin E) [Source:HGNC Symbol;Acc:9258]	-0.586	0.392	-0.881	0.0928333
ENSG00000084073	ZMPSTE24	zinc metallopeptidase STE24 homolog (S. cerevisiae) [Source:HGNC Symbol;Acc:12877]	0.51	0.44	0.59	0.389
ENSG00000084090	STARD7	StAR-related lipid transfer (START) domain containing 7 [Source:HGNC Symbol;Acc:18063]	0.504	0.445833	-0.02	0.863333
ENSG00000084092	NOA1	nitric oxide associated 1 [Source:HGNC Symbol;Acc:28473]	0.295	0.528833	-0.629	0.323167
ENSG00000084093	REST	RE1-silencing transcription factor [Source:HGNC Symbol;Acc:9966]	0.375	0.535167	-0.463	0.460833
ENSG00000084112	SSH1	slingshot homolog 1 (Drosophila) [Source:HGNC Symbol;Acc:30579]	0.272	0.71	-0.332	0.652
ENSG00000084207	GSTP1	glutathione S-transferase pi 1 [Source:HGNC Symbol;Acc:4638]	-0.522	0.457	-0.673	0.264833
ENSG00000084234	APLP2	amyloid beta (A4) precursor-like protein 2 [Source:HGNC Symbol;Acc:598]	0.671	0.267167	0.958	0.0446667
ENSG00000084444	KIAA1467	KIAA1467 [Source:HGNC Symbol;Acc:29288]	-0.731	0.228667	0.958	0.0446667
ENSG00000084463	WBP11	WW domain binding protein 11 [Source:HGNC Symbol;Acc:16461]	0.004	0.820167	-0.694	0.251667
ENSG00000084623	EIF3I	eukaryotic translation initiation factor 3, subunit I [Source:HGNC Symbol;Acc:3272]	-0.592	0.3815	-0.968	0.038
ENSG00000084636	COL16A1	collagen, type XVI, alpha 1 [Source:HGNC Symbol;Acc:2193]	-0.14	0.883333	0.624	0.3195
ENSG00000084652	TXLNA	taxilin alpha [Source:HGNC Symbol;Acc:30685]	0.546	0.414	-0.774	0.184833
ENSG00000084676	NCOA1	nuclear receptor coactivator 1 [Source:HGNC Symbol;Acc:7668]	0.149	0.67	0.83	0.144167
ENSG00000084693	AGBL5	ATP/GTP binding protein-like 5 [Source:HGNC Symbol;Acc:26147]	0.18	0.815833	-0.564	0.373667
ENSG00000084731	KIF3C	kinesin family member 3C [Source:HGNC Symbol;Acc:6321]	0.152	0.856	-0.6	0.35
ENSG00000084733	RAB10	RAB10, member RAS oncogene family [Source:HGNC Symbol;Acc:9759]	-0.037	0.908833	-0.559	0.410167
ENSG00000084734	GCKR	glucokinase (hexokinase 4) regulator [Source:HGNC Symbol;Acc:4196]	0.518	0.442833	0.627	0.316333
ENSG00000084754	HADHA	hydroxyacyl-CoA dehydrogenase/3-ketoacyl-CoA thiolase/enoyl-CoA hydratase (trifunctional protein), alpha subunit [Source:HGNC Symbol;Acc:4801]	-0.264	0.684	-0.972	0.0353333
ENSG00000084764	MAPRE3	microtubule-associated protein, RP/EB family, member 3 [Source:HGNC Symbol;Acc:6892]	0.279	0.711333	0.741	0.214167
ENSG00000084774	CAD	carbamoyl-phosphate synthetase 2, aspartate transcarbamylase, and dihydroorotase [Source:HGNC Symbol;Acc:1424]	-0.682	0.269833	-0.647	0.295167
ENSG00000085063	CD59	CD59 molecule, complement regulatory protein [Source:HGNC Symbol;Acc:1689]	0.493	0.484	-0.341	0.625
ENSG00000085117	CD82	CD82 molecule [Source:HGNC Symbol;Acc:6210]	0.323	0.671833	0.66	0.28
ENSG00000085185	BCORL1	BCL6 corepressor-like 1 [Source:HGNC Symbol;Acc:25657]	-0.591	0.341833	0.215	0.713667
ENSG00000085224	ATRX	alpha thalassemia/mental retardation syndrome X-linked [Source:HGNC Symbol;Acc:886]	0.428	0.548333	-0.587	0.363333
ENSG00000085231	TAF9	TAF9 RNA polymerase II, TATA box binding protein (TBP)-associated factor, 32kDa [Source:HGNC Symbol;Acc:11542]	-0.692	0.2635	-0.859	0.1195
ENSG00000085265	FCN1	ficolin (collagen/fibrinogen domain containing) 1 [Source:HGNC Symbol;Acc:3623]	0.225	0.636	0.011	0.678833
ENSG00000085274	MYNN	myoneurin [Source:HGNC Symbol;Acc:14955]	-0.57	0.362	-0.723	0.2405
ENSG00000085276	MECOM	MDS1 and EVI1 complex locus [Source:HGNC Symbol;Acc:3498]	-0.239	0.753667	-0.146	0.888667
ENSG00000085365	SCAMP1	secretory carrier membrane protein 1 [Source:HGNC Symbol;Acc:10563]	0.603	0.341	0.726	0.225833
ENSG00000085377	PREP	prolyl endopeptidase [Source:HGNC Symbol;Acc:9358]	-0.028	0.767	-0.468	0.489667
ENSG00000085382	HACE1	HECT domain and ankyrin repeat containing E3 ubiquitin protein ligase 1 [Source:HGNC Symbol;Acc:21033]	-0.388	0.563667	0.756	0.198333
ENSG00000085415	SEH1L	SEH1-like (S. cerevisiae) [Source:HGNC Symbol;Acc:30379]	-0.447	0.509333	-0.952	0.0476667
ENSG00000085433	WDR47	WD repeat domain 47 [Source:HGNC Symbol;Acc:29141]	0.194	0.813167	0.904	0.086
ENSG00000085449	WDFY1	WD repeat and FYVE domain containing 1 [Source:HGNC Symbol;Acc:20451]	0.005	0.734333	-0.919	0.0706667
ENSG00000085465	OVGP1	oviductal glycoprotein 1, 120kDa [Source:HGNC Symbol;Acc:8524]	0.659	0.281167	0.7	0.233333
ENSG00000085491	SLC25A24	solute carrier family 25 (mitochondrial carrier; phosphate carrier), member 24 [Source:HGNC Symbol;Acc:20662]	-0.868	0.0978333	-0.593	0.358
ENSG00000085511	MAP3K4	mitogen-activated protein kinase kinase kinase 4 [Source:HGNC Symbol;Acc:6856]	-0.348	0.6225	-0.656	0.296833
ENSG00000085514	PILRA	paired immunoglobin-like type 2 receptor alpha [Source:HGNC Symbol;Acc:20396]	-0.402	0.441	0.516	0.4125
ENSG00000085563	ABCB1	ATP-binding cassette, sub-family B (MDR/TAP), member 1 [Source:HGNC Symbol;Acc:40]	0.945	0.0533333	0.761	0.2115
ENSG00000085644	ZNF213	zinc finger protein 213 [Source:HGNC Symbol;Acc:13005]	0.622	0.3465	0.259	0.635667
ENSG00000085662	AKR1B1	aldo-keto reductase family 1, member B1 (aldose reductase) [Source:HGNC Symbol;Acc:381]	0.385	0.587333	0.238	0.745333
ENSG00000085719	CPNE3	copine III [Source:HGNC Symbol;Acc:2316]	0.063	0.9615	-0.637	0.306833
ENSG00000085721	RRN3	RRN3 RNA polymerase I transcription factor homolog (S. cerevisiae) [Source:HGNC Symbol;Acc:30346]	0.261	0.7205	-0.16	0.733
ENSG00000085733	CTTN	cortactin [Source:HGNC Symbol;Acc:3338]	0.125	0.896333	-0.759	0.204167
ENSG00000085760	MTIF2	mitochondrial translational initiation factor 2 [Source:HGNC Symbol;Acc:7441]	-0.636	0.324	-0.94	0.0566667
ENSG00000085788	DDHD2	DDHD domain containing 2 [Source:HGNC Symbol;Acc:29106]	0.58	0.383833	0.367	0.606833
ENSG00000085831	TTC39A	tetratricopeptide repeat domain 39A [Source:HGNC Symbol;Acc:18657]	-0.281	0.669667	0.682	0.269167
ENSG00000085832	EPS15	epidermal growth factor receptor pathway substrate 15 [Source:HGNC Symbol;Acc:3419]	-0.147	0.7225	0.332	0.6375
ENSG00000085840	ORC1	origin recognition complex, subunit 1 [Source:HGNC Symbol;Acc:8487]	-0.524	0.426	-0.753	0.203833
ENSG00000085871	MGST2	microsomal glutathione S-transferase 2 [Source:HGNC Symbol;Acc:7063]	0.742	0.202167	0.906	0.084
ENSG00000085872	CHERP	calcium homeostasis endoplasmic reticulum protein [Source:HGNC Symbol;Acc:16930]	-0.227	0.749333	-0.837	0.137
ENSG00000085978	ATG16L1	autophagy related 16-like 1 (S. cerevisiae) [Source:HGNC Symbol;Acc:21498]	0.348	0.629833	-0.598	0.349
ENSG00000085982	USP40	ubiquitin specific peptidase 40 [Source:HGNC Symbol;Acc:20069]	-0.078	0.745667	-0.753	0.194167
ENSG00000085998	POMGNT1	protein O-linked mannose beta1,2-N-acetylglucosaminyltransferase [Source:HGNC Symbol;Acc:19139]	0.31	0.680667	0.86	0.111833
ENSG00000085999	RAD54L	RAD54-like (S. cerevisiae) [Source:HGNC Symbol;Acc:9826]	-0.61	0.336	-0.832	0.134333
ENSG00000086015	MAST2	microtubule associated serine/threonine kinase 2 [Source:HGNC Symbol;Acc:19035]	-0.718	0.226	0.185	0.754167
ENSG00000086061	DNAJA1	DnaJ (Hsp40) homolog, subfamily A, member 1 [Source:HGNC Symbol;Acc:5229]	0.32	0.6665	-0.44	0.536333
ENSG00000086062	B4GALT1	UDP-Gal:betaGlcNAc beta 1,4- galactosyltransferase, polypeptide 1 [Source:HGNC Symbol;Acc:924]	-0.135	0.8025	0	1
ENSG00000086065	CHMP5	charged multivesicular body protein 5 [Source:HGNC Symbol;Acc:26942]	0.552	0.400333	0.735	0.223833
ENSG00000086102	NFX1	nuclear transcription factor, X-box binding 1 [Source:HGNC Symbol;Acc:7803]	0.531	0.436667	-0.772	0.1935
ENSG00000086189	DIMT1	DIM1 dimethyladenosine transferase 1 homolog (S. cerevisiae) [Source:HGNC Symbol;Acc:30217]	-0.775	0.200333	-0.565	0.343333
ENSG00000086200	IPO11	importin 11 [Source:HGNC Symbol;Acc:20628]	-0.743	0.207167	-0.752	0.209167
ENSG00000086232	EIF2AK1	eukaryotic translation initiation factor 2-alpha kinase 1 [Source:HGNC Symbol;Acc:24921]	0.49	0.476	-0.61	0.330333
ENSG00000086475	SEPHS1	selenophosphate synthetase 1 [Source:HGNC Symbol;Acc:19685]	-0.786	0.174667	-0.859	0.122
ENSG00000086504	MRPL28	mitochondrial ribosomal protein L28 [Source:HGNC Symbol;Acc:14484]	-0.458	0.505167	-0.88	0.103333
ENSG00000086544	ITPKC	inositol-trisphosphate 3-kinase C [Source:HGNC Symbol;Acc:14897]	0.716	0.233333	-0.627	0.325667
ENSG00000086570	FAT2	FAT tumor suppressor homolog 2 (Drosophila) [Source:HGNC Symbol;Acc:3596]	-0.491	0.472667	0.347	0.563167
ENSG00000086589	RBM22	RNA binding motif protein 22 [Source:HGNC Symbol;Acc:25503]	-0.67	0.293667	-0.531	0.422833
ENSG00000086598	TMED2	transmembrane emp24 domain trafficking protein 2 [Source:HGNC Symbol;Acc:16996]	-0.005	0.832167	0.457	0.500333
ENSG00000086619	ERO1LB	ERO1-like beta (S. cerevisiae) [Source:HGNC Symbol;Acc:14355]	0.179	0.818333	0.938	0.058
ENSG00000086666	ZFAND6	zinc finger, AN1-type domain 6 [Source:HGNC Symbol;Acc:30164]	-0.544	0.423833	-0.463	0.500167
ENSG00000086696	HSD17B2	hydroxysteroid (17-beta) dehydrogenase 2 [Source:HGNC Symbol;Acc:5211]	0.664	0.275333	0.463	0.493667
ENSG00000086712	TXLNG	taxilin gamma [Source:HGNC Symbol;Acc:18578]	-0.103	0.801167	-0.423	0.537667
ENSG00000086730	LAT2	linker for activation of T cells family, member 2 [Source:HGNC Symbol;Acc:12749]	0.362	0.511333	-0.012	0.751833
ENSG00000086758	HUWE1	HECT, UBA and WWE domain containing 1, E3 ubiquitin protein ligase [Source:HGNC Symbol;Acc:30892]	-0.008	0.677333	-0.7	0.250167
ENSG00000086827	ZW10	ZW10, kinetochore associated, homolog (Drosophila) [Source:HGNC Symbol;Acc:13194]	-0.671	0.277167	-0.859	0.118
ENSG00000086848	ALG9	asparagine-linked glycosylation 9, alpha-1,2-mannosyltransferase homolog (S. cerevisiae) [Source:HGNC Symbol;Acc:15672]	-0.348	0.603833	0.338	0.613833
ENSG00000086991	NOX4	NADPH oxidase 4 [Source:HGNC Symbol;Acc:7891]	-0.003	0.737167	0.719	0.241833
ENSG00000087008	ACOX3	acyl-CoA oxidase 3, pristanoyl [Source:HGNC Symbol;Acc:121]	0.217	0.727167	-0.914	0.0768333
ENSG00000087053	MTMR2	myotubularin related protein 2 [Source:HGNC Symbol;Acc:7450]	-0.555	0.4	-0.704	0.2545
ENSG00000087074	PPP1R15A	protein phosphatase 1, regulatory subunit 15A [Source:HGNC Symbol;Acc:14375]	-0.5	0.45	0.115	0.925
ENSG00000087076	HSD17B14	hydroxysteroid (17-beta) dehydrogenase 14 [Source:HGNC Symbol;Acc:23238]	0.6	0.35	0.895	0.0925
ENSG00000087077	TRIP6	thyroid hormone receptor interactor 6 [Source:HGNC Symbol;Acc:12311]	-0.53	0.4375	-0.806	0.153833
ENSG00000087085	ACHE	acetylcholinesterase [Source:HGNC Symbol;Acc:108]	-0.493	0.474167	0.939	0.0558333
ENSG00000087086	FTL	ferritin, light polypeptide [Source:HGNC Symbol;Acc:3999]	-0.346	0.606667	0.862	0.116333
ENSG00000087087	SRRT	serrate RNA effector molecule homolog (Arabidopsis) [Source:HGNC Symbol;Acc:24101]	-0.56	0.3885	-0.979	0.0306667
ENSG00000087088	BAX	BCL2-associated X protein [Source:HGNC Symbol;Acc:959]	-0.661	0.308667	-0.722	0.231
ENSG00000087095	NLK	nemo-like kinase [Source:HGNC Symbol;Acc:29858]	-0.057	0.962167	-0.534	0.426167
ENSG00000087111	PIGS	phosphatidylinositol glycan anchor biosynthesis, class S [Source:HGNC Symbol;Acc:14937]	0.917	0.072	0.344	0.637
ENSG00000087116	ADAMTS2	ADAM metallopeptidase with thrombospondin type 1 motif, 2 [Source:HGNC Symbol;Acc:218]	-0.224	0.784667	-0.083	0.9585
ENSG00000087152	ATXN7L3	ataxin 7-like 3 [Source:HGNC Symbol;Acc:25416]	0.212	0.678667	-0.553	0.404
ENSG00000087157	PGS1	phosphatidylglycerophosphate synthase 1 [Source:HGNC Symbol;Acc:30029]	0.283	0.710667	-0.271	0.643333
ENSG00000087191	PSMC5	proteasome (prosome, macropain) 26S subunit, ATPase, 5 [Source:HGNC Symbol;Acc:9552]	-0.385	0.566667	-0.838	0.119833
ENSG00000087206	UIMC1	ubiquitin interaction motif containing 1 [Source:HGNC Symbol;Acc:30298]	-0.898	0.0891667	-0.807	0.144833
ENSG00000087245	MMP2	matrix metallopeptidase 2 (gelatinase A, 72kDa gelatinase, 72kDa type IV collagenase) [Source:HGNC Symbol;Acc:7166]	0.254	0.733333	0.7	0.233333
ENSG00000087253	LPCAT2	lysophosphatidylcholine acyltransferase 2 [Source:HGNC Symbol;Acc:26032]	0.171	0.839333	0.888	0.0893333
ENSG00000087258	GNAO1	guanine nucleotide binding protein (G protein), alpha activating activity polypeptide O [Source:HGNC Symbol;Acc:4389]	-0.615	0.344667	0.275	0.711333
ENSG00000087263	OGFOD1	2-oxoglutarate and iron-dependent oxygenase domain containing 1 [Source:HGNC Symbol;Acc:25585]	0.41	0.565833	-0.502	0.441167
ENSG00000087266	SH3BP2	SH3-domain binding protein 2 [Source:HGNC Symbol;Acc:10825]	-0.082	0.709667	-0.877	0.104333
ENSG00000087269	NOP14	NOP14 nucleolar protein homolog (yeast) [Source:HGNC Symbol;Acc:16821]	-0.015	0.845	-0.877	0.107333
ENSG00000087274	ADD1	adducin 1 (alpha) [Source:HGNC Symbol;Acc:243]	0.342	0.613333	-0.348	0.613833
ENSG00000087299	L2HGDH	L-2-hydroxyglutarate dehydrogenase [Source:HGNC Symbol;Acc:20499]	-0.751	0.206667	-0.6	0.35
ENSG00000087301	TXNDC16	thioredoxin domain containing 16 [Source:HGNC Symbol;Acc:19965]	-0.386	0.556	0.52	0.448667
ENSG00000087302	C14orf166	chromosome 14 open reading frame 166 [Source:HGNC Symbol;Acc:23169]	-0.65	0.32	-0.903	0.088
ENSG00000087303	NID2	nidogen 2 (osteonidogen) [Source:HGNC Symbol;Acc:13389]	-0.956	0.046	-0.766	0.1965
ENSG00000087338	GMCL1	germ cell-less, spermatogenesis associated 1 [Source:HGNC Symbol;Acc:23843]	0.266	0.699667	0.424	0.545667
ENSG00000087365	SF3B2	splicing factor 3b, subunit 2, 145kDa [Source:HGNC Symbol;Acc:10769]	-0.341	0.560833	-0.833	0.144833
ENSG00000087448	KLHDC5	kelch domain containing 5 [Source:HGNC Symbol;Acc:29252]	-0.191	0.596	0.054	0.808667
ENSG00000087460	GNAS	GNAS complex locus [Source:HGNC Symbol;Acc:4392]	-0.325	0.571667	-0.513	0.456
ENSG00000087470	DNM1L	dynamin 1-like [Source:HGNC Symbol;Acc:2973]	-0.364	0.589167	-0.591	0.3855
ENSG00000087502	ERGIC2	ERGIC and golgi 2 [Source:HGNC Symbol;Acc:30208]	-0.401	0.435	0.426	0.543333
ENSG00000087510	TFAP2C	transcription factor AP-2 gamma (activating enhancer binding protein 2 gamma) [Source:HGNC Symbol;Acc:11744]	-0.183	0.713333	0.107	0.938333
ENSG00000087586	AURKA	aurora kinase A [Source:HGNC Symbol;Acc:11393]	-0.646	0.300167	-0.883	0.0975
ENSG00000087589	CASS4	Cas scaffolding protein family member 4 [Source:HGNC Symbol;Acc:15878]	-0.553	0.402833	-0.881	0.1025
ENSG00000087842	PIR	pirin (iron-binding nuclear protein) [Source:HGNC Symbol;Acc:30048]	-0.311	0.653667	0.86	0.116167
ENSG00000087884	C11orf67	chromosome 11 open reading frame 67 [Source:HGNC Symbol;Acc:30205]	0.46	0.508167	-0.367	0.556667
ENSG00000087903	RFX2	regulatory factor X, 2 (influences HLA class II expression) [Source:HGNC Symbol;Acc:9983]	-0.167	0.611	0.952	0.0486667
ENSG00000087995	METTL2A	methyltransferase like 2A [Source:HGNC Symbol;Acc:25755]	-0.64	0.321833	-0.844	0.124
ENSG00000088002	SULT2B1	sulfotransferase family, cytosolic, 2B, member 1 [Source:HGNC Symbol;Acc:11459]	0.215	0.6735	0.706	0.237167
ENSG00000088035	ALG6	asparagine-linked glycosylation 6, alpha-1,3-glucosyltransferase homolog (S. cerevisiae) [Source:HGNC Symbol;Acc:23157]	-0.417	0.477167	0.499	0.436333
ENSG00000088038	CNOT3	CCR4-NOT transcription complex, subunit 3 [Source:HGNC Symbol;Acc:7879]	-0.89	0.0901667	-0.883	0.101167
ENSG00000088053	GP6	glycoprotein VI (platelet) [Source:HGNC Symbol;Acc:14388]	-0.195	0.551333	-0.243	0.546
ENSG00000088179	PTPN4	protein tyrosine phosphatase, non-receptor type 4 (megakaryocyte) [Source:HGNC Symbol;Acc:9656]	0.433	0.486167	0.857	0.117167
ENSG00000088205	DDX18	DEAD (Asp-Glu-Ala-Asp) box polypeptide 18 [Source:HGNC Symbol;Acc:2741]	-0.701	0.238667	-0.78	0.185833
ENSG00000088247	KHSRP	KH-type splicing regulatory protein [Source:HGNC Symbol;Acc:6316]	-0.577	0.371167	-0.91	0.0816667
ENSG00000088256	GNA11	guanine nucleotide binding protein (G protein), alpha 11 (Gq class) [Source:HGNC Symbol;Acc:4379]	0.195	0.691667	-0.861	0.1205
ENSG00000088280	ASAP3	ArfGAP with SH3 domain, ankyrin repeat and PH domain 3 [Source:HGNC Symbol;Acc:14987]	-0.271	0.687	0.2	0.819667
ENSG00000088298	EDEM2	ER degradation enhancer, mannosidase alpha-like 2 [Source:HGNC Symbol;Acc:15877]	0.481	0.486667	0.442	0.523333
ENSG00000088305	DNMT3B	DNA (cytosine-5-)-methyltransferase 3 beta [Source:HGNC Symbol;Acc:2979]	-0.82	0.151833	-0.875	0.105833
ENSG00000088325	TPX2	TPX2, microtubule-associated, homolog (Xenopus laevis) [Source:HGNC Symbol;Acc:1249]	-0.582	0.368	-0.981	0.0293333
ENSG00000088340	FER1L4	fer-1-like 4 (C. elegans) pseudogene [Source:HGNC Symbol;Acc:15801]	0.042	0.860833	0.323	0.646667
ENSG00000088356	PDRG1	p53 and DNA-damage regulated 1 [Source:HGNC Symbol;Acc:16119]	0.333	0.608333	-0.629	0.316167
ENSG00000088367	EPB41L1	erythrocyte membrane protein band 4.1-like 1 [Source:HGNC Symbol;Acc:3378]	0.175	0.8235	0.898	0.0903333
ENSG00000088386	SLC15A1	solute carrier family 15 (oligopeptide transporter), member 1 [Source:HGNC Symbol;Acc:10920]	0.049	0.599833	-0.03	0.609667
ENSG00000088387	DOCK9	dedicator of cytokinesis 9 [Source:HGNC Symbol;Acc:14132]	0.607	0.351167	0.563	0.404
ENSG00000088448	ANKRD10	ankyrin repeat domain 10 [Source:HGNC Symbol;Acc:20265]	0.572	0.378	0.699	0.2525
ENSG00000088451	TGDS	TDP-glucose 4,6-dehydratase [Source:HGNC Symbol;Acc:20324]	0.633	0.314	0.196	0.726
ENSG00000088538	DOCK3	dedicator of cytokinesis 3 [Source:HGNC Symbol;Acc:2989]	0.78	0.181	0.935	0.059
ENSG00000088543	C3orf18	chromosome 3 open reading frame 18 [Source:HGNC Symbol;Acc:24837]	0.587	0.359667	1	0.0166667
ENSG00000088682	COQ9	coenzyme Q9 homolog (S. cerevisiae) [Source:HGNC Symbol;Acc:25302]	0.112	0.720667	-0.91	0.0766667
ENSG00000088726	TMEM40	transmembrane protein 40 [Source:HGNC Symbol;Acc:25620]	-0.296	0.594667	0.567	0.3925
ENSG00000088727	KIF9	kinesin family member 9 [Source:HGNC Symbol;Acc:16666]	0.057	0.691833	0.185	0.675833
ENSG00000088756	ARHGAP28	Rho GTPase activating protein 28 [Source:HGNC Symbol;Acc:25509]	-0.096	0.810167	0.188	0.812667
ENSG00000088766	CRLS1	cardiolipin synthase 1 [Source:HGNC Symbol;Acc:16148]	-0.58	0.396333	-0.409	0.539167
ENSG00000088808	PPP1R13B	protein phosphatase 1, regulatory subunit 13B [Source:HGNC Symbol;Acc:14950]	0.646	0.310667	-0.677	0.2805
ENSG00000088812	ATRN	attractin [Source:HGNC Symbol;Acc:885]	0.664	0.308667	0.907	0.0838333
ENSG00000088826	SMOX	spermine oxidase [Source:HGNC Symbol;Acc:15862]	-0.274	0.662667	-0.838	0.124667
ENSG00000088832	FKBP1A	FK506 binding protein 1A, 12kDa [Source:HGNC Symbol;Acc:3711]	0.386	0.596167	-0.926	0.066
ENSG00000088833	NSFL1C	NSFL1 (p97) cofactor (p47) [Source:HGNC Symbol;Acc:15912]	-0.526	0.440333	-0.864	0.101333
ENSG00000088836	SLC4A11	solute carrier family 4, sodium borate transporter, member 11 [Source:HGNC Symbol;Acc:16438]	0.719	0.242	0.821	0.149333
ENSG00000088854	C20orf194	chromosome 20 open reading frame 194 [Source:HGNC Symbol;Acc:17721]	0.281	0.710167	0.822	0.149333
ENSG00000088876	ZNF343	zinc finger protein 343 [Source:HGNC Symbol;Acc:16017]	-0.191	0.656	-0.522	0.434833
ENSG00000088881	EBF4	early B-cell factor 4 [Source:HGNC Symbol;Acc:29278]	-0.09	0.753333	-0.054	0.596
ENSG00000088882	CPXM1	carboxypeptidase X (M14 family), member 1 [Source:HGNC Symbol;Acc:15771]	-1	0.0166667	-0.853	0.106833
ENSG00000088888	MAVS	mitochondrial antiviral signaling protein [Source:HGNC Symbol;Acc:29233]	0.473	0.483667	-0.855	0.120833
ENSG00000088899	RP5-1187M17.10	ProSAP-interacting protein 1 [Source:UniProtKB/Swiss-Prot;Acc:O60299]	0.92	0.0681667	0.766	0.191167
ENSG00000088930	XRN2	5'-3' exoribonuclease 2 [Source:HGNC Symbol;Acc:12836]	-0.616	0.333333	-0.919	0.0751667
ENSG00000088970	PLK1S1	polo-like kinase 1 substrate 1 [Source:HGNC Symbol;Acc:15865]	-0.465	0.497833	0.303	0.629833
ENSG00000088986	DYNLL1	dynein, light chain, LC8-type 1 [Source:HGNC Symbol;Acc:15476]	-0.007	0.649833	-0.726	0.237167
ENSG00000089006	SNX5	sorting nexin 5 [Source:HGNC Symbol;Acc:14969]	-0.814	0.154	-0.87	0.109333
ENSG00000089009	RPL6	ribosomal protein L6 [Source:HGNC Symbol;Acc:10362]	-0.612	0.360333	-0.842	0.133667
ENSG00000089022	MAPKAPK5	mitogen-activated protein kinase-activated protein kinase 5 [Source:HGNC Symbol;Acc:6889]	-0.66	0.3005	-0.594	0.361667
ENSG00000089041	P2RX7	purinergic receptor P2X, ligand-gated ion channel, 7 [Source:HGNC Symbol;Acc:8537]	-0.038	0.828	-0.486	0.4315
ENSG00000089048	ESF1	ESF1, nucleolar pre-rRNA processing protein, homolog (S. cerevisiae) [Source:HGNC Symbol;Acc:15898]	-0.758	0.195667	-0.523	0.430667
ENSG00000089050	RBBP9	retinoblastoma binding protein 9 [Source:HGNC Symbol;Acc:9892]	-0.113	0.557667	0.092	0.773833
ENSG00000089053	ANAPC5	anaphase promoting complex subunit 5 [Source:HGNC Symbol;Acc:15713]	-0.179	0.7295	-0.94	0.0566667
ENSG00000089057	SLC23A2	solute carrier family 23 (nucleobase transporters), member 2 [Source:HGNC Symbol;Acc:10973]	0.439	0.5335	0.85	0.1245
ENSG00000089060	SLC24A6	solute carrier family 24 (sodium/lithium/calcium exchanger), member 6 [Source:HGNC Symbol;Acc:26175]	-0.175	0.810167	0.684	0.252
ENSG00000089063	TMEM230	transmembrane protein 230 [Source:HGNC Symbol;Acc:15876]	0.374	0.542167	0.901	0.0881667
ENSG00000089091	DZANK1	double zinc ribbon and ankyrin repeat domains 1 [Source:HGNC Symbol;Acc:15858]	-0.33	0.586667	-0.487	0.476333
ENSG00000089094	KDM2B	lysine (K)-specific demethylase 2B [Source:HGNC Symbol;Acc:13610]	-0.647	0.299	-0.889	0.0968333
ENSG00000089123	TASP1	taspase, threonine aspartase, 1 [Source:HGNC Symbol;Acc:15859]	-0.654	0.326	-0.218	0.638167
ENSG00000089154	GCN1L1	GCN1 general control of amino-acid synthesis 1-like 1 (yeast) [Source:HGNC Symbol;Acc:4199]	-0.453	0.514	-0.812	0.161667
ENSG00000089157	RPLP0	ribosomal protein, large, P0 [Source:HGNC Symbol;Acc:10371]	-0.488	0.470333	-0.883	0.101167
ENSG00000089159	PXN	paxillin [Source:HGNC Symbol;Acc:9718]	0.221	0.670333	-0.828	0.149333
ENSG00000089163	SIRT4	sirtuin 4 [Source:HGNC Symbol;Acc:14932]	0.313	0.6645	0.479	0.489333
ENSG00000089177	KIF16B	kinesin family member 16B [Source:HGNC Symbol;Acc:15869]	0.246	0.736167	0.903	0.086
ENSG00000089195	TRMT6	tRNA methyltransferase 6 homolog (S. cerevisiae) [Source:HGNC Symbol;Acc:20900]	-0.555	0.3975	-0.803	0.16
ENSG00000089199	CHGB	chromogranin B (secretogranin 1) [Source:HGNC Symbol;Acc:1930]	0.509	0.454	0.246	0.5975
ENSG00000089220	PEBP1	phosphatidylethanolamine binding protein 1 [Source:HGNC Symbol;Acc:8630]	0.279	0.719333	-0.252	0.715333
ENSG00000089225	TBX5	T-box 5 [Source:HGNC Symbol;Acc:11604]	-0.31	0.645333	0.1	0.95
ENSG00000089234	BRAP	BRCA1 associated protein [Source:HGNC Symbol;Acc:1099]	0.402	0.576667	0.083	0.764833
ENSG00000089248	ERP29	endoplasmic reticulum protein 29 [Source:HGNC Symbol;Acc:13799]	-0.325	0.635667	-0.743	0.209333
ENSG00000089280	FUS	fused in sarcoma [Source:HGNC Symbol;Acc:4010]	-0.745	0.211667	-1	0.0166667
ENSG00000089289	IGBP1	immunoglobulin (CD79A) binding protein 1 [Source:HGNC Symbol;Acc:5461]	0.365	0.608833	-0.206	0.808667
ENSG00000089327	FXYD5	FXYD domain containing ion transport regulator 5 [Source:HGNC Symbol;Acc:4029]	-0.346	0.634167	-0.889	0.0968333
ENSG00000089335	ZNF302	zinc finger protein 302 [Source:HGNC Symbol;Acc:13848]	0.642	0.301	0.9	0.0833333
ENSG00000089351	GRAMD1A	GRAM domain containing 1A [Source:HGNC Symbol;Acc:29305]	-0.606	0.36	-0.885	0.0881667
ENSG00000089472	HEPH	hephaestin [Source:HGNC Symbol;Acc:4866]	-1	0.0166667	-0.525	0.425
ENSG00000089486	C16orf5	chromosome 16 open reading frame 5 [Source:HGNC Symbol;Acc:13234]	0.504	0.4595	0.169	0.835
ENSG00000089505	CMTM1	CKLF-like MARVEL transmembrane domain containing 1 [Source:HGNC Symbol;Acc:19172]	-0.509	0.350667	0.573	0.379
ENSG00000089597	GANAB	glucosidase, alpha; neutral AB [Source:HGNC Symbol;Acc:4138]	-0.393	0.58	-0.845	0.134167
ENSG00000089639	GMIP	GEM interacting protein [Source:HGNC Symbol;Acc:24852]	0.466	0.483667	-0.852	0.122333
ENSG00000089682	RBM41	RNA binding motif protein 41 [Source:HGNC Symbol;Acc:25617]	0.242	0.549833	-0.666	0.2825
ENSG00000089685	BIRC5	baculoviral IAP repeat containing 5 [Source:HGNC Symbol;Acc:593]	-0.607	0.3395	-0.983	0.028
ENSG00000089692	LAG3	lymphocyte-activation gene 3 [Source:HGNC Symbol;Acc:6476]	-0.2	0.803	-0.878	0.103333
ENSG00000089693	MLF2	myeloid leukemia factor 2 [Source:HGNC Symbol;Acc:7126]	-0.28	0.592167	-0.416	0.5435
ENSG00000089723	OTUB2	OTU domain, ubiquitin aldehyde binding 2 [Source:HGNC Symbol;Acc:20351]	-0.769	0.189667	-0.076	0.811667
ENSG00000089737	DDX24	DEAD (Asp-Glu-Ala-Asp) box polypeptide 24 [Source:HGNC Symbol;Acc:13266]	0.443	0.5275	0.852	0.120667
ENSG00000089775	ZBTB25	zinc finger and BTB domain containing 25 [Source:HGNC Symbol;Acc:13112]	0.477	0.495667	0.17	0.6705
ENSG00000089818	NECAP1	NECAP endocytosis associated 1 [Source:HGNC Symbol;Acc:24539]	0.187	0.7225	-0.536	0.420833
ENSG00000089820	ARHGAP4	Rho GTPase activating protein 4 [Source:HGNC Symbol;Acc:674]	0.002	0.725333	0.836	0.149167
ENSG00000089847	ANKRD24	ankyrin repeat domain 24 [Source:HGNC Symbol;Acc:29424]	0.567	0.380833	0.894	0.0848333
ENSG00000089876	DHX32	DEAH (Asp-Glu-Ala-His) box polypeptide 32 [Source:HGNC Symbol;Acc:16717]	0.521	0.432333	0.667	0.286333
ENSG00000089902	RCOR1	REST corepressor 1 [Source:HGNC Symbol;Acc:17441]	-0.737	0.214833	-0.901	0.0881667
ENSG00000089916	C14orf118	chromosome 14 open reading frame 118 [Source:HGNC Symbol;Acc:20210]	0.547	0.418	-0.796	0.170333
ENSG00000090006	LTBP4	latent transforming growth factor beta binding protein 4 [Source:HGNC Symbol;Acc:6717]	-0.208	0.739333	0.924	0.0673333
ENSG00000090013	BLVRB	biliverdin reductase B (flavin reductase (NADPH)) [Source:HGNC Symbol;Acc:1063]	-0.265	0.736	-0.856	0.1255
ENSG00000090020	SLC9A1	solute carrier family 9, subfamily A (NHE1, cation proton antiporter 1), member 1 [Source:HGNC Symbol;Acc:11071]	0.766	0.205667	0.469	0.437333
ENSG00000090054	SPTLC1	serine palmitoyltransferase, long chain base subunit 1 [Source:HGNC Symbol;Acc:11277]	-0.151	0.826333	-0.094	0.866833
ENSG00000090060	PAPOLA	poly(A) polymerase alpha [Source:HGNC Symbol;Acc:14981]	-0.755	0.207333	-0.695	0.270167
ENSG00000090061	CCNK	cyclin K [Source:HGNC Symbol;Acc:1596]	-0.578	0.371	-0.758	0.2055
ENSG00000090097	PCBP4	poly(rC) binding protein 4 [Source:HGNC Symbol;Acc:8652]	0.108	0.764667	-0.836	0.131333
ENSG00000090238	YPEL3	yippee-like 3 (Drosophila) [Source:HGNC Symbol;Acc:18327]	0.652	0.300333	0.51	0.4485
ENSG00000090263	MRPS33	mitochondrial ribosomal protein S33 [Source:HGNC Symbol;Acc:16634]	-0.222	0.726333	-0.788	0.180167
ENSG00000090266	NDUFB2	NADH dehydrogenase (ubiquinone) 1 beta subcomplex, 2, 8kDa [Source:HGNC Symbol;Acc:7697]	-0.155	0.586167	-0.582	0.372667
ENSG00000090273	NUDC	nuclear distribution C homolog (A. nidulans) [Source:HGNC Symbol;Acc:8045]	-0.682	0.2635	-0.863	0.101833
ENSG00000090316	MAEA	macrophage erythroblast attacher [Source:HGNC Symbol;Acc:13731]	0.362	0.621833	-0.817	0.1365
ENSG00000090339	ICAM1	intercellular adhesion molecule 1 [Source:HGNC Symbol;Acc:5344]	-0.9	0.0833333	0.343	0.611667
ENSG00000090372	STRN4	striatin, calmodulin binding protein 4 [Source:HGNC Symbol;Acc:15721]	-0.495	0.464167	-0.88	0.101
ENSG00000090376	IRAK3	interleukin-1 receptor-associated kinase 3 [Source:HGNC Symbol;Acc:17020]	-0.955	0.046	-0.657	0.2895
ENSG00000090432	MUL1	mitochondrial E3 ubiquitin protein ligase 1 [Source:HGNC Symbol;Acc:25762]	0.949	0.0493333	-0.065	0.728833
ENSG00000090447	TFAP4	transcription factor AP-4 (activating enhancer binding protein 4) [Source:HGNC Symbol;Acc:11745]	-0.803	0.166167	-0.819	0.136667
ENSG00000090470	PDCD7	programmed cell death 7 [Source:HGNC Symbol;Acc:8767]	0.751	0.206333	0.799	0.165667
ENSG00000090487	SPG21	spastic paraplegia 21 (autosomal recessive, Mast syndrome) [Source:HGNC Symbol;Acc:20373]	-0.3	0.648	0.763	0.205
ENSG00000090520	DNAJB11	DnaJ (Hsp40) homolog, subfamily B, member 11 [Source:HGNC Symbol;Acc:14889]	-0.3	0.683333	-0.436	0.513167
ENSG00000090530	LEPREL1	leprecan-like 1 [Source:HGNC Symbol;Acc:19317]	0.6	0.35	-0.147	0.784667
ENSG00000090539	CHRD	chordin [Source:HGNC Symbol;Acc:1949]	-0.809	0.1505	0.363	0.561167
ENSG00000090554	FLT3LG	fms-related tyrosine kinase 3 ligand [Source:HGNC Symbol;Acc:3766]	0.371	0.5755	-0.022	0.813833
ENSG00000090565	RAB11FIP3	RAB11 family interacting protein 3 (class II) [Source:HGNC Symbol;Acc:17224]	0.538	0.435167	0.013	0.798333
ENSG00000090581	GNPTG	N-acetylglucosamine-1-phosphate transferase, gamma subunit [Source:HGNC Symbol;Acc:23026]	0.639	0.302667	0.832	0.134333
ENSG00000090612	ZNF268	zinc finger protein 268 [Source:HGNC Symbol;Acc:13061]	-0.441	0.531833	-0.381	0.5625
ENSG00000090615	GOLGA3	golgin A3 [Source:HGNC Symbol;Acc:4426]	-0.771	0.188167	-0.621	0.319833
ENSG00000090621	PABPC4	poly(A) binding protein, cytoplasmic 4 (inducible form) [Source:HGNC Symbol;Acc:8557]	-0.647	0.326333	-0.94	0.0566667
ENSG00000090659	CD209	CD209 molecule [Source:HGNC Symbol;Acc:1641]	-0.667	0.293	0.059	0.553833
ENSG00000090661	CERS4	ceramide synthase 4 [Source:HGNC Symbol;Acc:23747]	0.256	0.75	0.697	0.242667
ENSG00000090674	MCOLN1	mucolipin 1 [Source:HGNC Symbol;Acc:13356]	0.63	0.315	0.87	0.0971667
ENSG00000090686	USP48	ubiquitin specific peptidase 48 [Source:HGNC Symbol;Acc:18533]	-0.16	0.806667	-0.008	0.878833
ENSG00000090776	EFNB1	ephrin-B1 [Source:HGNC Symbol;Acc:3226]	0.003	0.725	0.967	0.0386667
ENSG00000090857	PDPR	pyruvate dehydrogenase phosphatase regulatory subunit [Source:HGNC Symbol;Acc:30264]	0.639	0.318167	-0.885	0.100167
ENSG00000090861	AARS	alanyl-tRNA synthetase [Source:HGNC Symbol;Acc:20]	-0.339	0.64	-0.815	0.152667
ENSG00000090863	GLG1	golgi glycoprotein 1 [Source:HGNC Symbol;Acc:4316]	-0.066	0.766	0.136	0.792667
ENSG00000090889	KIF4A	kinesin family member 4A [Source:HGNC Symbol;Acc:13339]	-0.578	0.37	-0.96	0.0433333
ENSG00000090905	TNRC6A	trinucleotide repeat containing 6A [Source:HGNC Symbol;Acc:11969]	-0.41	0.564167	-0.808	0.1535
ENSG00000090920	FCGBP	Fc fragment of IgG binding protein [Source:HGNC Symbol;Acc:13572]	0.248	0.7565	0.44	0.527333
ENSG00000090924	PLEKHG2	pleckstrin homology domain containing, family G (with RhoGef domain) member 2 [Source:HGNC Symbol;Acc:29515]	-0.359	0.526667	-0.897	0.0883333
ENSG00000090932	DLL3	delta-like 3 (Drosophila) [Source:HGNC Symbol;Acc:2909]	-0.844	0.127333	-0.671	0.273833
ENSG00000090971	NAT14	N-acetyltransferase 14 (GCN5-related, putative) [Source:HGNC Symbol;Acc:28918]	-0.129	0.674667	-0.69	0.273667
ENSG00000090975	PITPNM2	phosphatidylinositol transfer protein, membrane-associated 2 [Source:HGNC Symbol;Acc:21044]	0.27	0.627833	0.124	0.761167
ENSG00000090989	EXOC1	exocyst complex component 1 [Source:HGNC Symbol;Acc:30380]	0.466	0.502833	-0.059	0.709167
ENSG00000091009	RBM27	RNA binding motif protein 27 [Source:HGNC Symbol;Acc:29243]	-0.688	0.262167	-0.809	0.1545
ENSG00000091039	OSBPL8	oxysterol binding protein-like 8 [Source:HGNC Symbol;Acc:16396]	-0.413	0.498	0.886	0.0983333
ENSG00000091073	DTX2	Probable E3 ubiquitin-protein ligase DTX2 [Source:UniProtKB/Swiss-Prot;Acc:Q86UW9]	-0.361	0.436	-0.719	0.237667
ENSG00000091106	NLRC4	NLR family, CARD domain containing 4 [Source:HGNC Symbol;Acc:16412]	0.035	0.5835	0.156	0.483167
ENSG00000091127	PUS7	pseudouridylate synthase 7 homolog (S. cerevisiae) [Source:HGNC Symbol;Acc:26033]	-0.68	0.278667	-0.864	0.1195
ENSG00000091128	LAMB4	laminin, beta 4 [Source:HGNC Symbol;Acc:6491]	0.793	0.181833	-0.447	0.5265
ENSG00000091129	NRCAM	neuronal cell adhesion molecule [Source:HGNC Symbol;Acc:7994]	0.36	0.535167	0.671	0.267167
ENSG00000091136	LAMB1	laminin, beta 1 [Source:HGNC Symbol;Acc:6486]	0.828	0.119333	-0.861	0.102833
ENSG00000091137	SLC26A4	solute carrier family 26, member 4 [Source:HGNC Symbol;Acc:8818]	0.201	0.7555	0.469	0.492333
ENSG00000091140	DLD	dihydrolipoamide dehydrogenase [Source:HGNC Symbol;Acc:2898]	-0.3	0.603167	-0.829	0.130833
ENSG00000091157	WDR7	WD repeat domain 7 [Source:HGNC Symbol;Acc:13490]	0.248	0.727833	0.259	0.728
ENSG00000091164	TXNL1	thioredoxin-like 1 [Source:HGNC Symbol;Acc:12436]	0.313	0.610833	-0.068	0.831667
ENSG00000091262	ABCC6	ATP-binding cassette, sub-family C (CFTR/MRP), member 6 [Source:HGNC Symbol;Acc:57]	0.191	0.738667	0.866	0.108833
ENSG00000091317	CMTM6	CKLF-like MARVEL transmembrane domain containing 6 [Source:HGNC Symbol;Acc:19177]	0.948	0.0513333	0.835	0.131833
ENSG00000091409	ITGA6	integrin, alpha 6 [Source:HGNC Symbol;Acc:6142]	0.204	0.811333	-0.664	0.275333
ENSG00000091428	RAPGEF4	Rap guanine nucleotide exchange factor (GEF) 4 [Source:HGNC Symbol;Acc:16626]	-0.928	0.0646667	0.105	0.941667
ENSG00000091436	AC013461.1	Mitogen-activated protein kinase kinase kinase MLT [Source:UniProtKB/Swiss-Prot;Acc:Q9NYL2]	0.272	0.714667	-0.844	0.125333
ENSG00000091483	FH	fumarate hydratase [Source:HGNC Symbol;Acc:3700]	-0.857	0.119167	-1	0.0166667
ENSG00000091490	SEL1L3	sel-1 suppressor of lin-12-like 3 (C. elegans) [Source:HGNC Symbol;Acc:29108]	-0.268	0.724667	-0.41	0.519
ENSG00000091513	TF	transferrin [Source:HGNC Symbol;Acc:11740]	0.365	0.614167	0.728	0.232333
ENSG00000091527	CDV3	CDV3 homolog (mouse) [Source:HGNC Symbol;Acc:26928]	-0.661	0.2835	-0.313	0.6765
ENSG00000091536	MYO15A	myosin XVA [Source:HGNC Symbol;Acc:7594]	-0.555	0.398	0.128	0.764333
ENSG00000091542	ALKBH5	alkB, alkylation repair homolog 5 (E. coli) [Source:HGNC Symbol;Acc:25996]	0.57	0.387833	0.082	0.930667
ENSG00000091592	NLRP1	NLR family, pyrin domain containing 1 [Source:HGNC Symbol;Acc:14374]	-0.472	0.462	-0.871	0.109
ENSG00000091622	PITPNM3	PITPNM family member 3 [Source:HGNC Symbol;Acc:21043]	0.921	0.0693333	0.052	0.474667
ENSG00000091640	SPAG7	sperm associated antigen 7 [Source:HGNC Symbol;Acc:11216]	-0.234	0.721167	-0.113	0.928333
ENSG00000091651	ORC6	origin recognition complex, subunit 6 [Source:HGNC Symbol;Acc:17151]	-0.54	0.4095	-0.665	0.286667
ENSG00000091656	ZFHX4	zinc finger homeobox 4 [Source:HGNC Symbol;Acc:30939]	-0.813	0.150167	-0.634	0.314
ENSG00000091732	ZC3HC1	zinc finger, C3HC-type containing 1 [Source:HGNC Symbol;Acc:29913]	-0.667	0.292333	-0.773	0.182
ENSG00000091831	ESR1	estrogen receptor 1 [Source:HGNC Symbol;Acc:3467]	0.603	0.367167	-0.187	0.6625
ENSG00000091844	RGS17	regulator of G-protein signaling 17 [Source:HGNC Symbol;Acc:14088]	-1	0.0166667	-0.744	0.213
ENSG00000091879	ANGPT2	angiopoietin 2 [Source:HGNC Symbol;Acc:485]	-0.343	0.3905	0.149	0.5105
ENSG00000091947	TMEM101	transmembrane protein 101 [Source:HGNC Symbol;Acc:28653]	-0.345	0.5965	-0.858	0.1205
ENSG00000091972	CD200	CD200 molecule [Source:HGNC Symbol;Acc:7203]	-0.23	0.632167	0.293	0.681333
ENSG00000091986	CCDC80	coiled-coil domain containing 80 [Source:HGNC Symbol;Acc:30649]	0.781	0.1855	0.705	0.250833
ENSG00000092010	PSME1	proteasome (prosome, macropain) activator subunit 1 (PA28 alpha) [Source:HGNC Symbol;Acc:9568]	0.478	0.468667	-0.669	0.2695
ENSG00000092020	PPP2R3C	protein phosphatase 2, regulatory subunit B'', gamma [Source:HGNC Symbol;Acc:17485]	0.532	0.427833	0.788	0.1785
ENSG00000092036	HAUS4	HAUS augmin-like complex, subunit 4 [Source:HGNC Symbol;Acc:20163]	-0.781	0.183	-0.881	0.100167
ENSG00000092068	SLC7A8	solute carrier family 7 (amino acid transporter light chain, L system), member 8 [Source:HGNC Symbol;Acc:11066]	-0.371	0.563333	0.071	0.863667
ENSG00000092094	OSGEP	O-sialoglycoprotein endopeptidase [Source:HGNC Symbol;Acc:18028]	-0.156	0.6505	-0.914	0.0736667
ENSG00000092096	SLC22A17	solute carrier family 22, member 17 [Source:HGNC Symbol;Acc:23095]	0.698	0.243833	0.951	0.0493333
ENSG00000092098	RNF31	ring finger protein 31 [Source:HGNC Symbol;Acc:16031]	0.064	0.712	-0.923	0.0716667
ENSG00000092108	SCFD1	sec1 family domain containing 1 [Source:HGNC Symbol;Acc:20726]	-0.385	0.592667	-0.521	0.452
ENSG00000092140	G2E3	G2/M-phase specific E3 ubiquitin protein ligase [Source:HGNC Symbol;Acc:20338]	-0.659	0.288833	-0.751	0.202167
ENSG00000092148	HECTD1	HECT domain containing E3 ubiquitin protein ligase 1 [Source:HGNC Symbol;Acc:20157]	0.635	0.344333	-0.865	0.112
ENSG00000092199	HNRNPC	heterogeneous nuclear ribonucleoprotein C (C1/C2) [Source:HGNC Symbol;Acc:5035]	-0.882	0.101167	-0.669	0.283
ENSG00000092200	RPGRIP1	retinitis pigmentosa GTPase regulator interacting protein 1 [Source:HGNC Symbol;Acc:13436]	-0.816	0.147333	-0.451	0.502
ENSG00000092201	SUPT16H	suppressor of Ty 16 homolog (S. cerevisiae) [Source:HGNC Symbol;Acc:11465]	-0.617	0.328167	-0.883	0.101167
ENSG00000092203	TOX4	TOX high mobility group box family member 4 [Source:HGNC Symbol;Acc:20161]	-0.057	0.698167	-0.845	0.129333
ENSG00000092208	GEMIN2	gem (nuclear organelle) associated protein 2 [Source:HGNC Symbol;Acc:10884]	-0.755	0.2135	-0.744	0.208333
ENSG00000092295	TGM1	transglutaminase 1 (K polypeptide epidermal type I, protein-glutamine-gamma-glutamyltransferase) [Source:HGNC Symbol;Acc:11777]	0.745	0.209167	0.781	0.180833
ENSG00000092330	TINF2	TERF1 (TRF1)-interacting nuclear factor 2 [Source:HGNC Symbol;Acc:11824]	-0.238	0.610833	0.153	0.698
ENSG00000092421	SEMA6A	sema domain, transmembrane domain (TM), and cytoplasmic domain, (semaphorin) 6A [Source:HGNC Symbol;Acc:10738]	0.854	0.117833	0.772	0.179333
ENSG00000092439	TRPM7	transient receptor potential cation channel, subfamily M, member 7 [Source:HGNC Symbol;Acc:17994]	0.249	0.681	0.374	0.575833
ENSG00000092445	TYRO3	TYRO3 protein tyrosine kinase [Source:HGNC Symbol;Acc:12446]	0.76	0.188333	-0.838	0.134833
ENSG00000092470	WDR76	WD repeat domain 76 [Source:HGNC Symbol;Acc:25773]	-0.549	0.400167	-0.681	0.2555
ENSG00000092529	CAPN3	calpain 3, (p94) [Source:HGNC Symbol;Acc:1480]	0.31	0.6705	0.847	0.124333
ENSG00000092531	SNAP23	synaptosomal-associated protein, 23kDa [Source:HGNC Symbol;Acc:11131]	0.424	0.549333	-0.452	0.514667
ENSG00000092621	PHGDH	phosphoglycerate dehydrogenase [Source:HGNC Symbol;Acc:8923]	-0.1	0.95	-0.274	0.718
ENSG00000092758	COL9A3	collagen, type IX, alpha 3 [Source:HGNC Symbol;Acc:2219]	-0.939	0.0583333	0.9	0.09
ENSG00000092820	EZR	ezrin [Source:HGNC Symbol;Acc:12691]	-0.56	0.39	-0.957	0.0453333
ENSG00000092841	MYL6	myosin, light chain 6, alkali, smooth muscle and non-muscle [Source:HGNC Symbol;Acc:7587]	-0.15	0.668333	-0.638	0.305667
ENSG00000092847	EIF2C1	eukaryotic translation initiation factor 2C, 1 [Source:HGNC Symbol;Acc:3262]	-0.718	0.243333	-0.618	0.332833
ENSG00000092853	CLSPN	claspin [Source:HGNC Symbol;Acc:19715]	-0.5	0.45	-0.708	0.243167
ENSG00000092871	RFFL	ring finger and FYVE-like domain containing E3 ubiquitin protein ligase [Source:HGNC Symbol;Acc:24821]	-0.836	0.134833	-0.46	0.504333
ENSG00000092929	UNC13D	unc-13 homolog D (C. elegans) [Source:HGNC Symbol;Acc:23147]	-0.031	0.7475	0.69	0.272
ENSG00000092931	MFSD11	major facilitator superfamily domain containing 11 [Source:HGNC Symbol;Acc:25458]	0.694	0.25	0.963	0.0413333
ENSG00000092964	DPYSL2	dihydropyrimidinase-like 2 [Source:HGNC Symbol;Acc:3014]	-0.3	0.683333	-0.052	0.9235
ENSG00000092978	GPATCH2	G patch domain containing 2 [Source:HGNC Symbol;Acc:25499]	-0.63	0.324667	-0.326	0.665333
ENSG00000093000	NUP50	nucleoporin 50kDa [Source:HGNC Symbol;Acc:8065]	-0.184	0.762833	-0.86	0.120167
ENSG00000093009	CDC45	cell division cycle 45 homolog (S. cerevisiae) [Source:HGNC Symbol;Acc:1739]	-0.642	0.305	-0.691	0.243833
ENSG00000093010	COMT	catechol-O-methyltransferase [Source:HGNC Symbol;Acc:2228]	0.775	0.181333	0.847	0.124833
ENSG00000093072	CECR1	cat eye syndrome chromosome region, candidate 1 [Source:HGNC Symbol;Acc:1839]	-0.893	0.0901667	-0.821	0.143167
ENSG00000093100	XXbac-B461K10.4		-0.733	0.213833	-0.881	0.105333
ENSG00000093134	VNN3	vanin 3 [Source:HGNC Symbol;Acc:16431]	0.345	0.621	-0.13	0.627333
ENSG00000093144	ECHDC1	enoyl CoA hydratase domain containing 1 [Source:HGNC Symbol;Acc:21489]	0.423	0.560333	0.057	0.790333
ENSG00000093167	LRRFIP2	leucine rich repeat (in FLII) interacting protein 2 [Source:HGNC Symbol;Acc:6703]	0.133	0.8805	0.981	0.0293333
ENSG00000093183	SEC22C	SEC22 vesicle trafficking protein homolog C (S. cerevisiae) [Source:HGNC Symbol;Acc:16828]	0.344	0.552833	-0.114	0.8065
ENSG00000093217	XYLB	xylulokinase homolog (H. influenzae) [Source:HGNC Symbol;Acc:12839]	-0.256	0.473667	-0.763	0.2055
ENSG00000094631	HDAC6	histone deacetylase 6 [Source:HGNC Symbol;Acc:14064]	-0.276	0.561	-0.64	0.3195
ENSG00000094755	GABRP	gamma-aminobutyric acid (GABA) A receptor, pi [Source:HGNC Symbol;Acc:4089]	0.106	0.5365	-0.225	0.5855
ENSG00000094804	CDC6	cell division cycle 6 homolog (S. cerevisiae) [Source:HGNC Symbol;Acc:1744]	-0.846	0.125333	-0.686	0.249667
ENSG00000094841	UPRT	uracil phosphoribosyltransferase (FUR1) homolog (S. cerevisiae) [Source:HGNC Symbol;Acc:28334]	-0.666	0.294167	-0.432	0.533333
ENSG00000094880	CDC23	cell division cycle 23 homolog (S. cerevisiae) [Source:HGNC Symbol;Acc:1724]	-0.648	0.294	-0.783	0.176833
ENSG00000094914	AAAS	achalasia, adrenocortical insufficiency, alacrimia [Source:HGNC Symbol;Acc:13666]	-0.081	0.6995	-0.662	0.277667
ENSG00000094916	CBX5	chromobox homolog 5 [Source:HGNC Symbol;Acc:1555]	-0.53	0.4195	-0.333	0.646667
ENSG00000094975	SUCO	SUN domain containing ossification factor [Source:HGNC Symbol;Acc:1240]	0.398	0.568667	0.728	0.228333
ENSG00000095002	MSH2	mutS homolog 2, colon cancer, nonpolyposis type 1 (E. coli) [Source:HGNC Symbol;Acc:7325]	-0.94	0.0566667	-0.615	0.3325
ENSG00000095015	MAP3K1	mitogen-activated protein kinase kinase kinase 1, E3 ubiquitin protein ligase [Source:HGNC Symbol;Acc:6848]	-0.271	0.735333	0.718	0.235167
ENSG00000095059	DHPS	deoxyhypusine synthase [Source:HGNC Symbol;Acc:2869]	-0.546	0.430333	-0.919	0.0751667
ENSG00000095066	HOOK2	hook homolog 2 (Drosophila) [Source:HGNC Symbol;Acc:19885]	0.282	0.649333	0.134	0.815
ENSG00000095139	ARCN1	archain 1 [Source:HGNC Symbol;Acc:649]	-0.079	0.732667	-0.758	0.204
ENSG00000095203	EPB41L4B	erythrocyte membrane protein band 4.1 like 4B [Source:HGNC Symbol;Acc:19818]	-0.975	0.0333333	-0.663	0.2845
ENSG00000095209	TMEM38B	transmembrane protein 38B [Source:HGNC Symbol;Acc:25535]	0.6	0.35	0.839	0.131
ENSG00000095261	PSMD5	proteasome (prosome, macropain) 26S subunit, non-ATPase, 5 [Source:HGNC Symbol;Acc:9563]	-0.114	0.655	-0.781	0.185667
ENSG00000095303	PTGS1	prostaglandin-endoperoxide synthase 1 (prostaglandin G/H synthase and cyclooxygenase) [Source:HGNC Symbol;Acc:9604]	-0.695	0.267167	-0.833	0.140833
ENSG00000095319	NUP188	nucleoporin 188kDa [Source:HGNC Symbol;Acc:17859]	-0.368	0.615	-0.874	0.110167
ENSG00000095321	CRAT	carnitine O-acetyltransferase [Source:HGNC Symbol;Acc:2342]	0.574	0.393667	-0.743	0.2235
ENSG00000095380	NANS	N-acetylneuraminic acid synthase [Source:HGNC Symbol;Acc:19237]	-0.427	0.522833	-0.978	0.0313333
ENSG00000095383	TBC1D2	TBC1 domain family, member 2 [Source:HGNC Symbol;Acc:18026]	0.875	0.105667	0.667	0.284667
ENSG00000095397	DFNB31	deafness, autosomal recessive 31 [Source:HGNC Symbol;Acc:16361]	0.472	0.4695	0.761	0.195167
ENSG00000095464	PDE6C	phosphodiesterase 6C, cGMP-specific, cone, alpha prime [Source:HGNC Symbol;Acc:8787]	0.007	0.588	-0.063	0.6895
ENSG00000095485	CWF19L1	CWF19-like 1, cell cycle control (S. pombe) [Source:HGNC Symbol;Acc:25613]	-0.485	0.478333	-0.655	0.292667
ENSG00000095539	SEMA4G	sema domain, immunoglobulin domain (Ig), transmembrane domain (TM) and short cytoplasmic domain, (semaphorin) 4G [Source:HGNC Symbol;Acc:10735]	-0.078	0.9435	0.537	0.420167
ENSG00000095564	BTAF1	BTAF1 RNA polymerase II, B-TFIID transcription factor-associated, 170kDa (Mot1 homolog, S. cerevisiae) [Source:HGNC Symbol;Acc:17307]	-0.365	0.625667	-0.88	0.106167
ENSG00000095574	IKZF5	IKAROS family zinc finger 5 (Pegasus) [Source:HGNC Symbol;Acc:14283]	-0.148	0.7225	-0.122	0.698
ENSG00000095587	TLL2	tolloid-like 2 [Source:HGNC Symbol;Acc:11844]	0.37	0.533333	0.3	0.69
ENSG00000095637	SORBS1	sorbin and SH3 domain containing 1 [Source:HGNC Symbol;Acc:14565]	0.401	0.566	-0.069	0.867
ENSG00000095739	BAMBI	BMP and activin membrane-bound inhibitor homolog (Xenopus laevis) [Source:HGNC Symbol;Acc:30251]	0.742	0.208167	0.415	0.534667
ENSG00000095752	IL11	interleukin 11 [Source:HGNC Symbol;Acc:5966]	-0.849	0.108167	-0.808	0.152333
ENSG00000095787	WAC	WW domain containing adaptor with coiled-coil [Source:HGNC Symbol;Acc:17327]	-0.631	0.324667	-0.358	0.5905
ENSG00000095794	CREM	cAMP responsive element modulator [Source:HGNC Symbol;Acc:2352]	-0.732	0.238333	0.237	0.714667
ENSG00000095906	NUBP2	nucleotide binding protein 2 [Source:HGNC Symbol;Acc:8042]	0.125	0.5425	-0.623	0.322333
ENSG00000095951	HIVEP1	human immunodeficiency virus type I enhancer binding protein 1 [Source:HGNC Symbol;Acc:4920]	0.738	0.248333	0.698	0.2575
ENSG00000096060	FKBP5	FK506 binding protein 5 [Source:HGNC Symbol;Acc:3721]	-0.697	0.25	-0.966	0.0393333
ENSG00000096063	SRPK1	SRSF protein kinase 1 [Source:HGNC Symbol;Acc:11305]	-0.003	0.933167	-0.626	0.319667
ENSG00000096070	BRPF3	bromodomain and PHD finger containing, 3 [Source:HGNC Symbol;Acc:14256]	-0.134	0.5605	-0.706	0.246
ENSG00000096080	MRPS18A	mitochondrial ribosomal protein S18A [Source:HGNC Symbol;Acc:14515]	-0.392	0.555167	-0.809	0.158667
ENSG00000096092	TMEM14A	transmembrane protein 14A [Source:HGNC Symbol;Acc:21076]	0.218	0.6605	0.522	0.431833
ENSG00000096093	EFHC1	EF-hand domain (C-terminal) containing 1 [Source:HGNC Symbol;Acc:16406]	-0.499	0.4635	0.732	0.210833
ENSG00000096384	HSP90AB1	heat shock protein 90kDa alpha (cytosolic), class B member 1 [Source:HGNC Symbol;Acc:5258]	-0.613	0.333167	-0.866	0.108833
ENSG00000096401	CDC5L	CDC5 cell division cycle 5-like (S. pombe) [Source:HGNC Symbol;Acc:1743]	-0.578	0.372	-0.826	0.1495
ENSG00000096433	ITPR3	inositol 1,4,5-trisphosphate receptor, type 3 [Source:HGNC Symbol;Acc:6182]	-0.933	0.0591667	-0.789	0.1785
ENSG00000096654	ZNF184	zinc finger protein 184 [Source:HGNC Symbol;Acc:12975]	-0.382	0.575667	0.235	0.759833
ENSG00000096696	DSP	desmoplakin [Source:HGNC Symbol;Acc:3052]	-0.575	0.372333	0.576	0.372667
ENSG00000096717	SIRT1	sirtuin 1 [Source:HGNC Symbol;Acc:14929]	0.062	0.690167	0.478	0.443
ENSG00000096746	HNRNPH3	heterogeneous nuclear ribonucleoprotein H3 (2H9) [Source:HGNC Symbol;Acc:5043]	-0.743	0.209667	-0.307	0.671333
ENSG00000096872	IFT74	intraflagellar transport 74 homolog (Chlamydomonas) [Source:HGNC Symbol;Acc:21424]	0.477	0.485333	0.677	0.269833
ENSG00000096968	JAK2	Janus kinase 2 [Source:HGNC Symbol;Acc:6192]	0.257	0.678167	0.298	0.564667
ENSG00000096996	IL12RB1	interleukin 12 receptor, beta 1 [Source:HGNC Symbol;Acc:5971]	0.106	0.697667	-0.451	0.438167
ENSG00000097007	ABL1	c-abl oncogene 1, non-receptor tyrosine kinase [Source:HGNC Symbol;Acc:76]	-0.676	0.272667	-0.692	0.2555
ENSG00000097021	ACOT7	acyl-CoA thioesterase 7 [Source:HGNC Symbol;Acc:24157]	0.451	0.5085	-0.872	0.102833
ENSG00000097033	SH3GLB1	SH3-domain GRB2-like endophilin B1 [Source:HGNC Symbol;Acc:10833]	0.358	0.621	0.078	0.657667
ENSG00000097046	CDC7	cell division cycle 7 homolog (S. cerevisiae) [Source:HGNC Symbol;Acc:1745]	-0.652	0.296167	-0.621	0.3255
ENSG00000097096	SYDE2	synapse defective 1, Rho GTPase, homolog 2 (C. elegans) [Source:HGNC Symbol;Acc:25841]	0.257	0.591667	0.249	0.686667
ENSG00000099139	PCSK5	proprotein convertase subtilisin/kexin type 5 [Source:HGNC Symbol;Acc:8747]	0.924	0.0673333	0.983	0.028
ENSG00000099194	SCD	stearoyl-CoA desaturase (delta-9-desaturase) [Source:HGNC Symbol;Acc:10571]	-0.349	0.617	0.14	0.886667
ENSG00000099203	TMED1	transmembrane emp24 protein transport domain containing 1 [Source:HGNC Symbol;Acc:17291]	-0.654	0.323333	-0.544	0.409833
ENSG00000099204	ABLIM1	actin binding LIM protein 1 [Source:HGNC Symbol;Acc:78]	0.624	0.351	0.2	0.783333
ENSG00000099219	ERMP1	endoplasmic reticulum metallopeptidase 1 [Source:HGNC Symbol;Acc:23703]	0.476	0.4965	0.648	0.289667
ENSG00000099246	RAB18	RAB18, member RAS oncogene family [Source:HGNC Symbol;Acc:14244]	0.522	0.436	0.937	0.0613333
ENSG00000099250	NRP1	neuropilin 1 [Source:HGNC Symbol;Acc:8004]	-0.857	0.104833	-0.025	0.858333
ENSG00000099251	HSD17B7P2	hydroxysteroid (17-beta) dehydrogenase 7 pseudogene 2 [Source:HGNC Symbol;Acc:28120]	-0.3	0.683333	0.641	0.316167
ENSG00000099256	PRTFDC1	phosphoribosyl transferase domain containing 1 [Source:HGNC Symbol;Acc:23333]	-0.954	0.0473333	-0.658	0.287167
ENSG00000099260	PALMD	palmdelphin [Source:HGNC Symbol;Acc:15846]	-0.807	0.153167	0.41	0.55
ENSG00000099282	TSPAN15	tetraspanin 15 [Source:HGNC Symbol;Acc:23298]	0.058	0.79	0.69	0.263167
ENSG00000099284	H2AFY2	H2A histone family, member Y2 [Source:HGNC Symbol;Acc:14453]	-0.822	0.1475	0.812	0.1445
ENSG00000099290	FAM21A	family with sequence similarity 21, member A [Source:HGNC Symbol;Acc:23416]	0.357	0.600667	-0.562	0.4015
ENSG00000099308	MAST3	microtubule associated serine/threonine kinase 3 [Source:HGNC Symbol;Acc:19036]	0.688	0.274167	0.885	0.0965
ENSG00000099326	MZF1	myeloid zinc finger 1 [Source:HGNC Symbol;Acc:13108]	0.582	0.362833	0.254	0.653833
ENSG00000099330	OCEL1	occludin/ELL domain containing 1 [Source:HGNC Symbol;Acc:26221]	0.636	0.313167	0.454	0.502167
ENSG00000099331	MYO9B	myosin IXB [Source:HGNC Symbol;Acc:7609]	-0.355	0.578667	-0.866	0.111
ENSG00000099337	KCNK6	potassium channel, subfamily K, member 6 [Source:HGNC Symbol;Acc:6281]	-0.599	0.348	-0.385	0.541667
ENSG00000099338	CATSPERG	catsper channel auxiliary subunit gamma [Source:HGNC Symbol;Acc:25243]	0.318	0.6775	0.651	0.315667
ENSG00000099341	PSMD8	proteasome (prosome, macropain) 26S subunit, non-ATPase, 8 [Source:HGNC Symbol;Acc:9566]	-0.527	0.444	-0.206	0.724
ENSG00000099364	FBXL19	F-box and leucine-rich repeat protein 19 [Source:HGNC Symbol;Acc:25300]	-0.544	0.3795	-0.874	0.108833
ENSG00000099365	STX1B	syntaxin 1B [Source:HGNC Symbol;Acc:18539]	0.218	0.788	-0.453	0.498833
ENSG00000099377	HSD3B7	hydroxy-delta-5-steroid dehydrogenase, 3 beta- and steroid delta-isomerase 7 [Source:HGNC Symbol;Acc:18324]	-0.251	0.6275	0.659	0.285167
ENSG00000099381	SETD1A	SET domain containing 1A [Source:HGNC Symbol;Acc:29010]	-0.315	0.648167	-0.768	0.195
ENSG00000099385	BCL7C	B-cell CLL/lymphoma 7C [Source:HGNC Symbol;Acc:1006]	-0.477	0.494167	-0.807	0.154833
ENSG00000099622	CIRBP	cold inducible RNA binding protein [Source:HGNC Symbol;Acc:1982]	0.645	0.296833	-0.406	0.574
ENSG00000099624	ATP5D	ATP synthase, H+ transporting, mitochondrial F1 complex, delta subunit [Source:HGNC Symbol;Acc:837]	0.213	0.568167	-0.925	0.0708333
ENSG00000099625	C19orf26	chromosome 19 open reading frame 26 [Source:HGNC Symbol;Acc:28617]	0.702	0.2575	-0.914	0.075
ENSG00000099715	PCDH11Y	protocadherin 11 Y-linked [Source:HGNC Symbol;Acc:15813]	-0.214	0.556833	0.039	0.607833
ENSG00000099725	PRKY	protein kinase, Y-linked, pseudogene [Source:HGNC Symbol;Acc:9444]	-0.479	0.479333	-0.862	0.102333
ENSG00000099749			0.409	0.484833	-0.308	0.682333
ENSG00000099783	HNRNPM	heterogeneous nuclear ribonucleoprotein M [Source:HGNC Symbol;Acc:5046]	-0.652	0.289333	-0.966	0.0393333
ENSG00000099785	MARCH2	membrane-associated ring finger (C3HC4) 2, E3 ubiquitin protein ligase [Source:HGNC Symbol;Acc:28038]	0.646	0.327167	0.895	0.091
ENSG00000099795	NDUFB7	NADH dehydrogenase (ubiquinone) 1 beta subcomplex, 7, 18kDa [Source:HGNC Symbol;Acc:7702]	-0.617	0.3555	-0.898	0.0903333
ENSG00000099797	TECR	trans-2,3-enoyl-CoA reductase [Source:HGNC Symbol;Acc:4551]	-0.658	0.3115	-0.606	0.325333
ENSG00000099800	TIMM13	translocase of inner mitochondrial membrane 13 homolog (yeast) [Source:HGNC Symbol;Acc:11816]	-0.489	0.491167	-0.876	0.1055
ENSG00000099804	CDC34	cell division cycle 34 homolog (S. cerevisiae) [Source:HGNC Symbol;Acc:1734]	0.412	0.537167	-0.517	0.444333
ENSG00000099810	MTAP	methylthioadenosine phosphorylase [Source:HGNC Symbol;Acc:7413]	-0.78	0.184333	-1	0.0166667
ENSG00000099814	KIAA0284	KIAA0284 [Source:HGNC Symbol;Acc:20362]	-0.127	0.707	-0.861	0.121333
ENSG00000099817	POLR2E	polymerase (RNA) II (DNA directed) polypeptide E, 25kDa [Source:HGNC Symbol;Acc:9192]	-0.373	0.5325	-0.909	0.0795
ENSG00000099821	POLRMT	polymerase (RNA) mitochondrial (DNA directed) [Source:HGNC Symbol;Acc:9200]	0.368	0.609	-0.445	0.507167
ENSG00000099822	HCN2	hyperpolarization activated cyclic nucleotide-gated potassium channel 2 [Source:HGNC Symbol;Acc:4846]	0.896	0.084	-0.605	0.351833
ENSG00000099834	CDHR5	cadherin-related family member 5 [Source:HGNC Symbol;Acc:7521]	0.313	0.599167	-0.689	0.257
ENSG00000099840	IZUMO4	IZUMO family member 4 [Source:HGNC Symbol;Acc:26950]	0.477	0.466167	0.69	0.262667
ENSG00000099849	RASSF7	Ras association (RalGDS/AF-6) domain family (N-terminal) member 7 [Source:HGNC Symbol;Acc:1166]	0.906	0.0818333	0.276	0.702333
ENSG00000099860	GADD45B	growth arrest and DNA-damage-inducible, beta [Source:HGNC Symbol;Acc:4096]	-0.309	0.65	0.611	0.334167
ENSG00000099864	PALM	paralemmin [Source:HGNC Symbol;Acc:8594]	-0.102	0.685	0.975	0.0333333
ENSG00000099866	MADCAM1	mucosal vascular addressin cell adhesion molecule 1 [Source:HGNC Symbol;Acc:6765]	0.506	0.46	0.711	0.239167
ENSG00000099875	MKNK2	MAP kinase interacting serine/threonine kinase 2 [Source:HGNC Symbol;Acc:7111]	-0.255	0.730833	-0.316	0.667667
ENSG00000099889	ARVCF	armadillo repeat gene deleted in velocardiofacial syndrome [Source:HGNC Symbol;Acc:728]	0.555	0.394167	0.79	0.170833
ENSG00000099899	TRMT2A	tRNA methyltransferase 2 homolog A (S. cerevisiae) [Source:HGNC Symbol;Acc:24974]	-0.21	0.614833	-0.741	0.211333
ENSG00000099901	RANBP1	RAN binding protein 1 [Source:HGNC Symbol;Acc:9847]	-0.513	0.449667	-0.817	0.137833
ENSG00000099904	ZDHHC8	zinc finger, DHHC-type containing 8 [Source:HGNC Symbol;Acc:18474]	0.175	0.628	-0.86	0.1155
ENSG00000099910	KLHL22	kelch-like 22 (Drosophila) [Source:HGNC Symbol;Acc:25888]	-0.283	0.595167	-0.609	0.337667
ENSG00000099917	MED15	mediator complex subunit 15 [Source:HGNC Symbol;Acc:14248]	0.231	0.682167	-0.497	0.469833
ENSG00000099940	SNAP29	synaptosomal-associated protein, 29kDa [Source:HGNC Symbol;Acc:11133]	0.641	0.302167	0.86	0.1235
ENSG00000099942	CRKL	v-crk sarcoma virus CT10 oncogene homolog (avian)-like [Source:HGNC Symbol;Acc:2363]	0.431	0.5275	-0.522	0.436667
ENSG00000099949	LZTR1	leucine-zipper-like transcription regulator 1 [Source:HGNC Symbol;Acc:6742]	0.081	0.9495	-0.623	0.323167
ENSG00000099953	MMP11	matrix metallopeptidase 11 (stromelysin 3) [Source:HGNC Symbol;Acc:7157]	0.38	0.594833	-0.351	0.598333
ENSG00000099956	SMARCB1	SWI/SNF related, matrix associated, actin dependent regulator of chromatin, subfamily b, member 1 [Source:HGNC Symbol;Acc:11103]	-0.629	0.338667	-0.992	0.022
ENSG00000099957	P2RX6	purinergic receptor P2X, ligand-gated ion channel, 6 [Source:HGNC Symbol;Acc:8538]	0.148	0.88	-0.557	0.391667
ENSG00000099958	DERL3	derlin 3 [Source:HGNC Symbol;Acc:14236]	-0.282	0.680667	-0.526	0.415
ENSG00000099968	BCL2L13	BCL2-like 13 (apoptosis facilitator) [Source:HGNC Symbol;Acc:17164]	0.407	0.4065	0.396	0.568333
ENSG00000099974	DDTL	D-dopachrome tautomerase-like [Source:HGNC Symbol;Acc:33446]	0.22	0.5185	-0.591	0.3565
ENSG00000099977	DDT	D-dopachrome tautomerase [Source:HGNC Symbol;Acc:2732]	-0.109	0.5345	-0.669	0.2695
ENSG00000099984	GSTT2	glutathione S-transferase theta 2 [Source:HGNC Symbol;Acc:4642]	0.189	0.603	-0.776	0.186
ENSG00000099991	CABIN1	calcineurin binding protein 1 [Source:HGNC Symbol;Acc:24187]	-0.065	0.648833	-0.889	0.0991667
ENSG00000099992	TBC1D10A	TBC1 domain family, member 10A [Source:HGNC Symbol;Acc:23609]	0.397	0.4835	-0.116	0.923667
ENSG00000099994	SUSD2	sushi domain containing 2 [Source:HGNC Symbol;Acc:30667]	-0.734	0.225833	-0.428	0.549333
ENSG00000099995	SF3A1	splicing factor 3a, subunit 1, 120kDa [Source:HGNC Symbol;Acc:10765]	-0.468	0.493	-0.904	0.086
ENSG00000099998	GGT5	gamma-glutamyltransferase 5 [Source:HGNC Symbol;Acc:4260]	-0.502	0.4505	-0.881	0.1015
ENSG00000099999	RNF215	ring finger protein 215 [Source:HGNC Symbol;Acc:33434]	0.379	0.572333	0.626	0.3275
ENSG00000100003	SEC14L2	SEC14-like 2 (S. cerevisiae) [Source:HGNC Symbol;Acc:10699]	0.312	0.677333	-0.984	0.0273333
ENSG00000100014	SPECC1L	sperm antigen with calponin homology and coiled-coil domains 1-like [Source:HGNC Symbol;Acc:29022]	0.213	0.743	-0.186	0.723167
ENSG00000100023	PPIL2	peptidylprolyl isomerase (cyclophilin)-like 2 [Source:HGNC Symbol;Acc:9261]	-0.659	0.2855	-0.878	0.104167
ENSG00000100024	UPB1	ureidopropionase, beta [Source:HGNC Symbol;Acc:16297]	-0.682	0.275667	-0.424	0.471667
ENSG00000100027	YPEL1	yippee-like 1 (Drosophila) [Source:HGNC Symbol;Acc:12845]	-0.208	0.795167	0.647	0.3135
ENSG00000100028	SNRPD3	small nuclear ribonucleoprotein D3 polypeptide 18kDa [Source:HGNC Symbol;Acc:11160]	0.262	0.72	-0.915	0.0743333
ENSG00000100029	PES1	pescadillo ribosomal biogenesis factor 1 [Source:HGNC Symbol;Acc:8848]	-0.609	0.366667	-0.969	0.0373333
ENSG00000100030	MAPK1	mitogen-activated protein kinase 1 [Source:HGNC Symbol;Acc:6871]	0.232	0.754	-0.356	0.616333
ENSG00000100031	GGT1	gamma-glutamyltransferase 1 [Source:HGNC Symbol;Acc:4250]	0.557	0.3965	0.974	0.034
ENSG00000100034	PPM1F	protein phosphatase, Mg2+/Mn2+ dependent, 1F [Source:HGNC Symbol;Acc:19388]	0.267	0.721	-0.845	0.126833
ENSG00000100036	SLC35E4	solute carrier family 35, member E4 [Source:HGNC Symbol;Acc:17058]	0.546	0.413167	-0.315	0.464167
ENSG00000100038	TOP3B	topoisomerase (DNA) III beta [Source:HGNC Symbol;Acc:11993]	-0.481	0.4895	-0.839	0.139
ENSG00000100055	CYTH4	cytohesin 4 [Source:HGNC Symbol;Acc:9505]	0.826	0.143167	0.685	0.283667
ENSG00000100056	DGCR14	DiGeorge syndrome critical region gene 14 [Source:HGNC Symbol;Acc:16817]	0.448	0.522333	-0.763	0.1945
ENSG00000100058	CRYBB2P1	crystallin, beta B2 pseudogene 1 [Source:HGNC Symbol;Acc:2399]	-0.493	0.483667	0.199	0.789333
ENSG00000100065	CARD10	caspase recruitment domain family, member 10 [Source:HGNC Symbol;Acc:16422]	-0.393	0.531833	-0.98	0.03
ENSG00000100068	LRP5L	low density lipoprotein receptor-related protein 5-like [Source:HGNC Symbol;Acc:25323]	-0.687	0.285167	-0.907	0.0821667
ENSG00000100075	SLC25A1	solute carrier family 25 (mitochondrial carrier; citrate transporter), member 1 [Source:HGNC Symbol;Acc:10979]	-0.391	0.586	-0.74	0.215
ENSG00000100077	ADRBK2	adrenergic, beta, receptor kinase 2 [Source:HGNC Symbol;Acc:290]	0.596	0.359167	-0.354	0.623333
ENSG00000100079	LGALS2	lectin, galactoside-binding, soluble, 2 [Source:HGNC Symbol;Acc:6562]	0.132	0.680333	-0.14	0.808333
ENSG00000100083	GGA1	golgi-associated, gamma adaptin ear containing, ARF binding protein 1 [Source:HGNC Symbol;Acc:17842]	0.201	0.795167	-0.671	0.267167
ENSG00000100084	HIRA	HIR histone cell cycle regulation defective homolog A (S. cerevisiae) [Source:HGNC Symbol;Acc:4916]	-0.738	0.2395	-0.791	0.1775
ENSG00000100092	SH3BP1	SH3-domain binding protein 1 [Source:HGNC Symbol;Acc:10824]	-0.552	0.3975	-0.973	0.0346667
ENSG00000100097	LGALS1	lectin, galactoside-binding, soluble, 1 [Source:HGNC Symbol;Acc:6561]	-0.696	0.278667	-0.916	0.0773333
ENSG00000100099	HPS4	Hermansky-Pudlak syndrome 4 [Source:HGNC Symbol;Acc:15844]	-0.64	0.312	-0.275	0.722833
ENSG00000100100	PIK3IP1	phosphoinositide-3-kinase interacting protein 1 [Source:HGNC Symbol;Acc:24942]	0.6	0.35	1	0.0166667
ENSG00000100104	SRRD	SRR1 domain containing [Source:HGNC Symbol;Acc:33910]	-0.392	0.565667	-0.518	0.433333
ENSG00000100105	PATZ1	POZ (BTB) and AT hook containing zinc finger 1 [Source:HGNC Symbol;Acc:13071]	-0.536	0.435667	-0.749	0.199333
ENSG00000100106	TRIOBP	TRIO and F-actin binding protein [Source:HGNC Symbol;Acc:17009]	-0.877	0.094	-0.706	0.258833
ENSG00000100109	TFIP11	tuftelin interacting protein 11 [Source:HGNC Symbol;Acc:17165]	0.127	0.674833	-0.876	0.0965
ENSG00000100116	GCAT	glycine C-acetyltransferase [Source:HGNC Symbol;Acc:4188]	-0.34	0.5155	-0.866	0.108833
ENSG00000100124	ANKRD54	ankyrin repeat domain 54 [Source:HGNC Symbol;Acc:25185]	0.003	0.741333	-0.176	0.760833
ENSG00000100129	EIF3L	eukaryotic translation initiation factor 3, subunit L [Source:HGNC Symbol;Acc:18138]	-0.47	0.4575	-0.461	0.503833
ENSG00000100138	NHP2L1	NHP2 non-histone chromosome protein 2-like 1 (S. cerevisiae) [Source:HGNC Symbol;Acc:7819]	-0.571	0.398333	-0.565	0.375167
ENSG00000100139	MICALL1	MICAL-like 1 [Source:HGNC Symbol;Acc:29804]	0.044	0.736833	-0.907	0.0831667
ENSG00000100142	POLR2F	polymerase (RNA) II (DNA directed) polypeptide F [Source:HGNC Symbol;Acc:9193]	-0.512	0.457667	-0.704	0.260333
ENSG00000100147	CCDC134	coiled-coil domain containing 134 [Source:HGNC Symbol;Acc:26185]	-0.632	0.320167	-0.715	0.239333
ENSG00000100150	DEPDC5	DEP domain containing 5 [Source:HGNC Symbol;Acc:18423]	-0.13	0.6795	-0.844	0.13
ENSG00000100151	PICK1	protein interacting with PRKCA 1 [Source:HGNC Symbol;Acc:9394]	-0.541	0.419	-0.792	0.172833
ENSG00000100154	TTC28	tetratricopeptide repeat domain 28 [Source:HGNC Symbol;Acc:29179]	-0.242	0.525333	0.591	0.348333
ENSG00000100162	CENPM	centromere protein M [Source:HGNC Symbol;Acc:18352]	-0.611	0.334333	-0.9	0.0833333
ENSG00000100167	SEPT3	septin 3 [Source:HGNC Symbol;Acc:10750]	0.077	0.931	0.137	0.877833
ENSG00000100181	TPTEP1	transmembrane phosphatase with tensin homology pseudogene 1 [Source:HGNC Symbol;Acc:43648]	-0.748	0.218667	0.983	0.028
ENSG00000100196	KDELR3	KDEL (Lys-Asp-Glu-Leu) endoplasmic reticulum protein retention receptor 3 [Source:HGNC Symbol;Acc:6306]	-0.211	0.790167	-0.726	0.226667
ENSG00000100197	CYP2D6	cytochrome P450, family 2, subfamily D, polypeptide 6 [Source:HGNC Symbol;Acc:2625]	0.455	0.442	0.218	0.628667
ENSG00000100201	DDX17	DEAD (Asp-Glu-Ala-Asp) box helicase 17 [Source:HGNC Symbol;Acc:2740]	0.081	0.647	-0.324	0.649
ENSG00000100206	DMC1	DMC1 dosage suppressor of mck1 homolog, meiosis-specific homologous recombination (yeast) [Source:HGNC Symbol;Acc:2927]	-0.813	0.145	-0.761	0.1955
ENSG00000100207	TCF20	transcription factor 20 (AR1) [Source:HGNC Symbol;Acc:11631]	0.117	0.599833	-0.578	0.366167
ENSG00000100209	HSCB	HscB iron-sulfur cluster co-chaperone homolog (E. coli) [Source:HGNC Symbol;Acc:28913]	-0.467	0.498167	-0.714	0.233
ENSG00000100211	CBY1	chibby homolog 1 (Drosophila) [Source:HGNC Symbol;Acc:1307]	-0.379	0.566167	0.879	0.101333
ENSG00000100216	TOMM22	translocase of outer mitochondrial membrane 22 homolog (yeast) [Source:HGNC Symbol;Acc:18002]	-0.696	0.288333	-0.856	0.12
ENSG00000100219	XBP1	X-box binding protein 1 [Source:HGNC Symbol;Acc:12801]	-0.381	0.593333	-0.31	0.674667
ENSG00000100220	C22orf28	chromosome 22 open reading frame 28 [Source:HGNC Symbol;Acc:26935]	-0.523	0.4445	-0.98	0.03
ENSG00000100221	JOSD1	Josephin domain containing 1 [Source:HGNC Symbol;Acc:28953]	-0.078	0.694333	-0.828	0.137333
ENSG00000100225	FBXO7	F-box protein 7 [Source:HGNC Symbol;Acc:13586]	-0.404	0.546	0.085	0.8215
ENSG00000100226	GTPBP1	GTP binding protein 1 [Source:HGNC Symbol;Acc:4669]	-0.032	0.498	-0.832	0.143333
ENSG00000100227	POLDIP3	polymerase (DNA-directed), delta interacting protein 3 [Source:HGNC Symbol;Acc:23782]	-0.554	0.395333	-0.839	0.13
ENSG00000100228	RAB36	RAB36, member RAS oncogene family [Source:HGNC Symbol;Acc:9775]	0.673	0.278667	0.052	0.831
ENSG00000100234	TIMP3	TIMP metallopeptidase inhibitor 3 [Source:HGNC Symbol;Acc:11822]	-0.762	0.194167	0.954	0.0473333
ENSG00000100239	PPP6R2	protein phosphatase 6, regulatory subunit 2 [Source:HGNC Symbol;Acc:19253]	0.245	0.606333	-0.791	0.182667
ENSG00000100241	SBF1	SET binding factor 1 [Source:HGNC Symbol;Acc:10542]	-0.166	0.543333	-0.893	0.0931667
ENSG00000100242	SUN2	Sad1 and UNC84 domain containing 2 [Source:HGNC Symbol;Acc:14210]	0.322	0.620667	-0.724	0.215333
ENSG00000100243	CYB5R3	cytochrome b5 reductase 3 [Source:HGNC Symbol;Acc:2873]	0.693	0.275833	0.994	0.0206667
ENSG00000100246	DNAL4	dynein, axonemal, light chain 4 [Source:HGNC Symbol;Acc:2955]	-0.208	0.7545	0.81	0.163333
ENSG00000100253	MIOX	myo-inositol oxygenase [Source:HGNC Symbol;Acc:14522]	-0.495	0.403833	-0.286	0.6305
ENSG00000100258	LMF2	lipase maturation factor 2 [Source:HGNC Symbol;Acc:25096]	0.645	0.306667	-0.799	0.164333
ENSG00000100263	RHBDD3	rhomboid domain containing 3 [Source:HGNC Symbol;Acc:1308]	-0.181	0.8145	-0.067	0.7395
ENSG00000100266	PACSIN2	protein kinase C and casein kinase substrate in neurons 2 [Source:HGNC Symbol;Acc:8571]	-0.591	0.357167	-0.913	0.0795
ENSG00000100271	TTLL1	tubulin tyrosine ligase-like family, member 1 [Source:HGNC Symbol;Acc:1312]	0.335	0.646667	0.848	0.125167
ENSG00000100280	AP1B1	adaptor-related protein complex 1, beta 1 subunit [Source:HGNC Symbol;Acc:554]	-0.273	0.720667	-0.685	0.2575
ENSG00000100281	HMGXB4	HMG box domain containing 4 [Source:HGNC Symbol;Acc:5003]	-0.597	0.35	-0.791	0.172833
ENSG00000100284	TOM1	target of myb1 (chicken) [Source:HGNC Symbol;Acc:11982]	0.544	0.406	0.631	0.313833
ENSG00000100285	NEFH	neurofilament, heavy polypeptide [Source:HGNC Symbol;Acc:7737]	-0.882	0.0968333	-0.608	0.329
ENSG00000100288	CHKB	choline kinase beta [Source:HGNC Symbol;Acc:1938]	0.603	0.349833	0.161	0.483667
ENSG00000100292	HMOX1	heme oxygenase (decycling) 1 [Source:HGNC Symbol;Acc:5013]	-0.574	0.352333	-0.54	0.418
ENSG00000100294	MCAT	malonyl CoA:ACP acyltransferase (mitochondrial) [Source:HGNC Symbol;Acc:29622]	-0.549	0.412167	-0.809	0.162167
ENSG00000100296	THOC5	THO complex 5 [Source:HGNC Symbol;Acc:19074]	-0.866	0.113667	-0.778	0.174833
ENSG00000100297	MCM5	minichromosome maintenance complex component 5 [Source:HGNC Symbol;Acc:6948]	-0.556	0.394	-0.673	0.264833
ENSG00000100299	ARSA	arylsulfatase A [Source:HGNC Symbol;Acc:713]	0.606	0.336167	0.845	0.132667
ENSG00000100300	TSPO	translocator protein (18kDa) [Source:HGNC Symbol;Acc:1158]	-0.115	0.909167	-0.832	0.143833
ENSG00000100302	RASD2	RASD family, member 2 [Source:HGNC Symbol;Acc:18229]	-0.155	0.545167	0.22	0.7285
ENSG00000100304	TTLL12	tubulin tyrosine ligase-like family, member 12 [Source:HGNC Symbol;Acc:28974]	-0.679	0.257833	-0.936	0.0621667
ENSG00000100307	CBX7	chromobox homolog 7 [Source:HGNC Symbol;Acc:1557]	0.632	0.312667	1	0.0166667
ENSG00000100316	RPL3	ribosomal protein L3 [Source:HGNC Symbol;Acc:10332]	-0.542	0.399167	-0.839	0.139667
ENSG00000100319	ZMAT5	zinc finger, matrin-type 5 [Source:HGNC Symbol;Acc:28046]	-0.209	0.595667	-0.698	0.254
ENSG00000100320	RBFOX2	RNA binding protein, fox-1 homolog (C. elegans) 2 [Source:HGNC Symbol;Acc:9906]	-0.813	0.146667	-0.888	0.100667
ENSG00000100321	SYNGR1	synaptogyrin 1 [Source:HGNC Symbol;Acc:11498]	0.589	0.361	0.923	0.068
ENSG00000100324	TAB1	TGF-beta activated kinase 1/MAP3K7 binding protein 1 [Source:HGNC Symbol;Acc:18157]	-0.189	0.558833	-0.899	0.0918333
ENSG00000100325	ASCC2	activating signal cointegrator 1 complex subunit 2 [Source:HGNC Symbol;Acc:24103]	-0.365	0.609333	-0.858	0.1225
ENSG00000100330	MTMR3	myotubularin related protein 3 [Source:HGNC Symbol;Acc:7451]	0.522	0.4585	0.672	0.288167
ENSG00000100335	SMCR7L	Smith-Magenis syndrome chromosome region, candidate 7-like [Source:HGNC Symbol;Acc:25979]	0.78	0.194333	-0.63	0.320667
ENSG00000100336	APOL4	apolipoprotein L, 4 [Source:HGNC Symbol;Acc:14867]	0.15	0.774667	0.572	0.376
ENSG00000100342	APOL1	apolipoprotein L, 1 [Source:HGNC Symbol;Acc:618]	0.138	0.877667	-0.653	0.298
ENSG00000100344	PNPLA3	patatin-like phospholipase domain containing 3 [Source:HGNC Symbol;Acc:18590]	-0.081	0.717	-0.697	0.253333
ENSG00000100345	MYH9	myosin, heavy chain 9, non-muscle [Source:HGNC Symbol;Acc:7579]	0.041	0.87	-0.935	0.063
ENSG00000100347	SAMM50	sorting and assembly machinery component 50 homolog (S. cerevisiae) [Source:HGNC Symbol;Acc:24276]	-0.695	0.284667	-0.904	0.0773333
ENSG00000100348	TXN2	thioredoxin 2 [Source:HGNC Symbol;Acc:17772]	-0.716	0.258	-0.892	0.0946667
ENSG00000100350	FOXRED2	FAD-dependent oxidoreductase domain containing 2 [Source:HGNC Symbol;Acc:26264]	-0.398	0.590167	-0.843	0.126667
ENSG00000100353	EIF3D	eukaryotic translation initiation factor 3, subunit D [Source:HGNC Symbol;Acc:3278]	-0.739	0.228833	-0.93	0.0666667
ENSG00000100354	TNRC6B	trinucleotide repeat containing 6B [Source:HGNC Symbol;Acc:29190]	0.293	0.612667	-0.399	0.5495
ENSG00000100359	SGSM3	small G protein signaling modulator 3 [Source:HGNC Symbol;Acc:25228]	-0.701	0.279667	-0.583	0.370833
ENSG00000100360	IFT27	intraflagellar transport 27 homolog (Chlamydomonas) [Source:HGNC Symbol;Acc:18626]	0.07	0.933333	-0.481	0.462667
ENSG00000100364	KIAA0930	KIAA0930 [Source:HGNC Symbol;Acc:1314]	0.925	0.0666667	0.966	0.0393333
ENSG00000100372	SLC25A17	solute carrier family 25 (mitochondrial carrier; peroxisomal membrane protein, 34kDa), member 17 [Source:HGNC Symbol;Acc:10987]	-0.628	0.345333	-0.771	0.1925
ENSG00000100376	FAM118A	family with sequence similarity 118, member A [Source:HGNC Symbol;Acc:1313]	-0.227	0.772	-0.832	0.145
ENSG00000100379	KCTD17	potassium channel tetramerisation domain containing 17 [Source:HGNC Symbol;Acc:25705]	0.137	0.611167	-0.596	0.368167
ENSG00000100380	ST13	suppression of tumorigenicity 13 (colon carcinoma) (Hsp70 interacting protein) [Source:HGNC Symbol;Acc:11343]	-0.143	0.692	0.5	0.464667
ENSG00000100387	RBX1	ring-box 1, E3 ubiquitin protein ligase [Source:HGNC Symbol;Acc:9928]	-0.626	0.344333	-0.671	0.283
ENSG00000100393	EP300	E1A binding protein p300 [Source:HGNC Symbol;Acc:3373]	-0.082	0.558333	-0.819	0.1575
ENSG00000100395	L3MBTL2	l(3)mbt-like 2 (Drosophila) [Source:HGNC Symbol;Acc:18594]	-0.619	0.330667	-0.721	0.244833
ENSG00000100399	CHADL	chondroadherin-like [Source:HGNC Symbol;Acc:25165]	-0.281	0.692	0.809	0.156667
ENSG00000100401	RANGAP1	Ran GTPase activating protein 1 [Source:HGNC Symbol;Acc:9854]	0.212	0.694333	-0.675	0.271667
ENSG00000100403	ZC3H7B	zinc finger CCCH-type containing 7B [Source:HGNC Symbol;Acc:30869]	0.599	0.345833	-0.782	0.179
ENSG00000100410	PHF5A	PHD finger protein 5A [Source:HGNC Symbol;Acc:18000]	-0.71	0.271	-0.868	0.101167
ENSG00000100412	ACO2	aconitase 2, mitochondrial [Source:HGNC Symbol;Acc:118]	-0.388	0.578167	-0.841	0.134333
ENSG00000100413	POLR3H	polymerase (RNA) III (DNA directed) polypeptide H (22.9kD) [Source:HGNC Symbol;Acc:30349]	-0.475	0.473333	-0.695	0.2575
ENSG00000100416	TRMU	tRNA 5-methylaminomethyl-2-thiouridylate methyltransferase [Source:HGNC Symbol;Acc:25481]	-0.494	0.4765	-0.724	0.211667
ENSG00000100417	PMM1	phosphomannomutase 1 [Source:HGNC Symbol;Acc:9114]	0.085	0.649	-0.849	0.123667
ENSG00000100418	DESI1	desumoylating isopeptidase 1 [Source:HGNC Symbol;Acc:24577]	0.242	0.753	-0.628	0.317333
ENSG00000100422	CERK	ceramide kinase [Source:HGNC Symbol;Acc:19256]	-0.258	0.684167	-0.214	0.781333
ENSG00000100425	BRD1	bromodomain containing 1 [Source:HGNC Symbol;Acc:1102]	-0.614	0.355333	-0.8	0.163
ENSG00000100426	ZBED4	zinc finger, BED-type containing 4 [Source:HGNC Symbol;Acc:20721]	-0.621	0.323	-0.901	0.0881667
ENSG00000100429	HDAC10	histone deacetylase 10 [Source:HGNC Symbol;Acc:18128]	0.297	0.497	-0.754	0.2035
ENSG00000100439	ABHD4	abhydrolase domain containing 4 [Source:HGNC Symbol;Acc:20154]	0.132	0.896667	0.874	0.0948333
ENSG00000100441	KHNYN	KH and NYN domain containing [Source:HGNC Symbol;Acc:20166]	-0.088	0.576333	-0.889	0.0963333
ENSG00000100442	FKBP3	FK506 binding protein 3, 25kDa [Source:HGNC Symbol;Acc:3719]	-0.783	0.182167	-0.748	0.212167
ENSG00000100445	SDR39U1	short chain dehydrogenase/reductase family 39U, member 1 [Source:HGNC Symbol;Acc:20275]	-0.131	0.571	0.479	0.483833
ENSG00000100461	RBM23	RNA binding motif protein 23 [Source:HGNC Symbol;Acc:20155]	-0.467	0.4885	-0.63	0.315667
ENSG00000100462	PRMT5	protein arginine methyltransferase 5 [Source:HGNC Symbol;Acc:10894]	-0.714	0.247667	-0.65	0.291667
ENSG00000100473	COCH	coagulation factor C homolog, cochlin (Limulus polyphemus) [Source:HGNC Symbol;Acc:2180]	-0.568	0.347667	0.108	0.737833
ENSG00000100478	AP4S1	adaptor-related protein complex 4, sigma 1 subunit [Source:HGNC Symbol;Acc:575]	-0.466	0.460833	-0.57	0.397333
ENSG00000100479	POLE2	polymerase (DNA directed), epsilon 2, accessory subunit [Source:HGNC Symbol;Acc:9178]	-0.624	0.321667	-0.772	0.179333
ENSG00000100483	METTL21D	methyltransferase like 21D [Source:HGNC Symbol;Acc:20352]	-0.679	0.275167	0.05	0.746333
ENSG00000100485	SOS2	son of sevenless homolog 2 (Drosophila) [Source:HGNC Symbol;Acc:11188]	0.294	0.609833	0.632	0.325
ENSG00000100490	CDKL1	cyclin-dependent kinase-like 1 (CDC2-related kinase) [Source:HGNC Symbol;Acc:1781]	-0.083	0.950167	0.17	0.7195
ENSG00000100503	NIN	ninein (GSK3B interacting protein) [Source:HGNC Symbol;Acc:14906]	-0.13	0.697	-0.874	0.107667
ENSG00000100504	PYGL	phosphorylase, glycogen, liver [Source:HGNC Symbol;Acc:9725]	-0.993	0.0213333	-0.594	0.354833
ENSG00000100519	PSMC6	proteasome (prosome, macropain) 26S subunit, ATPase, 6 [Source:HGNC Symbol;Acc:9553]	-0.618	0.352	-0.567	0.4035
ENSG00000100522	GNPNAT1	glucosamine-phosphate N-acetyltransferase 1 [Source:HGNC Symbol;Acc:19980]	-0.638	0.305667	-0.714	0.235333
ENSG00000100523	DDHD1	DDHD domain containing 1 [Source:HGNC Symbol;Acc:19714]	0.583	0.392833	0.368	0.61
ENSG00000100526	CDKN3	cyclin-dependent kinase inhibitor 3 [Source:HGNC Symbol;Acc:1791]	-0.587	0.359667	-0.876	0.101333
ENSG00000100528	CNIH	cornichon homolog (Drosophila) [Source:HGNC Symbol;Acc:19431]	-0.051	0.687	0.004	0.580667
ENSG00000100532	CGRRF1	cell growth regulator with ring finger domain 1 [Source:HGNC Symbol;Acc:15528]	0.256	0.647167	0.736	0.222667
ENSG00000100554	ATP6V1D	ATPase, H+ transporting, lysosomal 34kDa, V1 subunit D [Source:HGNC Symbol;Acc:13527]	0.481	0.497833	0.13	0.780333
ENSG00000100557	C14orf105	chromosome 14 open reading frame 105 [Source:HGNC Symbol;Acc:20189]	-0.725	0.232167	-0.13	0.550167
ENSG00000100558	PLEK2	pleckstrin 2 [Source:HGNC Symbol;Acc:19238]	-0.298	0.6605	-0.988	0.0246667
ENSG00000100564	PIGH	phosphatidylinositol glycan anchor biosynthesis, class H [Source:HGNC Symbol;Acc:8964]	-0.273	0.705333	0.407	0.562333
ENSG00000100567	PSMA3	proteasome (prosome, macropain) subunit, alpha type, 3 [Source:HGNC Symbol;Acc:9532]	-0.435	0.557333	-0.758	0.201
ENSG00000100568	VTI1B	vesicle transport through interaction with t-SNAREs homolog 1B (yeast) [Source:HGNC Symbol;Acc:17793]	0.596	0.369833	0.804	0.157333
ENSG00000100575	TIMM9	translocase of inner mitochondrial membrane 9 homolog (yeast) [Source:HGNC Symbol;Acc:11819]	-0.553	0.383833	-0.552	0.4055
ENSG00000100577	GSTZ1	glutathione S-transferase zeta 1 [Source:HGNC Symbol;Acc:4643]	-0.295	0.666833	-0.877	0.107833
ENSG00000100578	KIAA0586	KIAA0586 [Source:HGNC Symbol;Acc:19960]	-0.784	0.1705	-0.6	0.35
ENSG00000100580	TMED8	transmembrane emp24 protein transport domain containing 8 [Source:HGNC Symbol;Acc:18633]	0.314	0.6685	0.3	0.683333
ENSG00000100583	SAMD15	sterile alpha motif domain containing 15 [Source:HGNC Symbol;Acc:18631]	-0.297	0.650833	-0.742	0.215333
ENSG00000100591	AHSA1	AHA1, activator of heat shock 90kDa protein ATPase homolog 1 (yeast) [Source:HGNC Symbol;Acc:1189]	-0.555	0.390333	-0.768	0.181667
ENSG00000100592	DAAM1	dishevelled associated activator of morphogenesis 1 [Source:HGNC Symbol;Acc:18142]	0.266	0.7085	0.229	0.723833
ENSG00000100596	SPTLC2	serine palmitoyltransferase, long chain base subunit 2 [Source:HGNC Symbol;Acc:11278]	-0.702	0.254833	-0.245	0.726333
ENSG00000100599	RIN3	Ras and Rab interactor 3 [Source:HGNC Symbol;Acc:18751]	-0.441	0.419	-0.919	0.0751667
ENSG00000100600	LGMN	legumain [Source:HGNC Symbol;Acc:9472]	0.826	0.138833	0.795	0.173333
ENSG00000100601	ALKBH1	alkB, alkylation repair homolog 1 (E. coli) [Source:HGNC Symbol;Acc:17911]	0.584	0.3225	-0.734	0.223333
[truncated: 17,238 more rows]
